# Supplementary material for: Prediction of N-linked glycosylation sites using position relative features and statistical moments
Source: PubMed Central journal article supplement (PMC5552137; doi:10.1371/journal.pone.0181966), 2017-08-10
Supplement: pone.0181966.s001.pdf [file pone.0181966.s001.pdf]

## Supplementary Data Set (S1) of Negative N-Linked Site

| Accession No | List of Sequences for Negative N-Linked Sites |
|--------------|-----------------------------------------------|
| P62593       | KVKDAEDQLGARVGYIELDLNSGKILESFRPEERFPMSTF      |
| Q17QI8       | YPDQDVFACFSVVPSSSQNITEKWLPEIRTHNPQAPVLL       |
| P52843       | VPIWNRSPWIETDIGYSALINKEGPRITSHLPIHLFSKSF      |
| Q3LRV9       | VLTTSPPEETDSSINGTGHRNQSSSSPGWTSPLLLVSVQYG     |
| Q13145       | ARNHSGTTIPTLECCHEMCMNYRGLHDVLSPPRGEASGQGN     |
| Q9BUP3       | DRDYVLKSAELAKAGGCKHFNLLSSKGDKSSNFYLYQVKG      |
| Q8VCR9       | DLGPRLNVPDYELKYPVPTNRRDRSRYAAVFQDQYGEFSE      |
| Q9NZQ0       | TIGIDYGVTKVHVRDREIKVNI FDMAGHPFFYEVRNEFYKD    |
| Q8VBX0       | HVACAREHLDCVKVLLNAGANVNAAKLHETALHHAAKVKNV     |
| Q9CQK7       | FTYSEKYPDETPLYEIFSQENLEDNDVSDILKLLALQAEEN     |
| Q9CYZ2       | KLGMSSYSIRHSISMPVMRNSATPKSFEDRVGTIKSKVVG      |
| Q58DW4       | DKHMNLILCDCDEFKIKPKNSKQAEREKRVLGLVLLRGE       |
| Q8R197       | ICFPWAGGSGTHFAKWGRKINGLLEVVHAVRLAGRETRFEEP    |
| O55101       | VDPTPDNPNTAYASYPSASVENYQQPFPTQNVETTEGYQPPP    |
| O43752       | LRSIEWDLEDLDETISIVEANPRKFNLDATLSIRKAFITS      |
| Q08DY9       | KNFHENTGMACRSGTDVDAANLRETFMNLKYEVRIKNDLTC     |
| P18181       | SNVRKEDKGTYYMRVLRRETENELKITLEVFDVPPKPSIEIN    |
| Q9TU03       | TEKAPEPHVEEDDDELGGKLNKPPQKSLKELQEMDKDDE       |
| Q96DR5       | QKSSAWQLAKQKAEKLLNNSKLLPTNTDIFGLKISN          |
| P55789       | RNHPDTRTRACFTQWLCHLHNEVNRKLGKPDFDCSKVDERW     |
| Q9CQF3       | QDGLQDWWIDDICIGNWWRPNFEPQYPIPAHITKPKKHK       |
| Q8NB37       | SESKPICAVGHGVAALCCATNEDRSWVDSYSLTGPSVCEL      |
| P12401       | ELRNMKNLSEAVISSAMEIENMSEKIQAFIESQFRKIIVPV     |
| Q9Y2R9       | AEEQATIERNPYTIFHQALKNCEPMIGLVPIKGGGRFYQVP     |
| Q3UNB8       | ITLELRRAPCIWKVRAMMISNTFNLIILGFVAVVIEVMKTAL    |
| Q1LZ95       | SIWGEHEIDYILLVKKNVTLNPDNPKSYCYVTKKEELEEL      |
| Q96DC9       | SFNLISEKCDILSILRDHPENRIYRRIEELSFRFTAIRKT      |
| O88822       | PATWPEDNIIRQTISLLIVTNLGAIIYFFCATLSYFVYD       |
| Q9CWQ3       | RHLACSEIRAASLSGDCSLVNELFRLRFGLKQHHQIETSCV     |
| Q13326       | NSEGEVTGRLKVGPKMVEVQNFQINSNDGKPLFTVDEKE       |
| P05937       | SGFIETEELKNFLKDLLEKANKTVDDTKLAEYTDLMLKLF      |
| P12004       | ARLVQGSILKKVLEALKDLINACWDISSSGVNLQSMDSH       |
| Q08DU1       | LLSMVEDGNPHHYFLATQDQNLMSKVKKPGIPLMFIQNT       |
| Q0VCP1       | AVILGPPGSGKGTVCQRIQNFGQLHLSGHLRENKANT         |
| P61106       | SWLTDARNLTNPNTVILIGNKADLEAQRDVTYEEAKQFAE      |
| Q5IBH6       | AGLFSWQYRPIHFFLALYLANDMEEDNAPKQDIFYFLYK       |
| Q9HAP6       | PGGVADRHGGLKRGDQLLSVNGVSVGEQHEKAVELLKAAQ      |
| Q2KIR7       | KSLRKSPLMSLKVYGTVMHMNHGNPFNLKALVDKWPDFQTV     |

|        |                                              |
|--------|----------------------------------------------|
| Q9HBL8 | QGAEVVQGDQDDQVIMELALNGAYATFVITVNYWESCSQEQE   |
| Q9QWG7 | LDEEALDRIVHHTSFEMMKENPLVNYTHLPTAMMDHKSPPF    |
| Q8TDU5 | LFESWNIQNNDLKCKIITFLNRVMRGVSICTTCLLSVLQAI    |
| Q8VBT0 | LWAVPGAHGRNRNVRLTDENWTSLEGEWMIIFYAPWCPA      |
| Q43704 | MKENPKKEIKKIIRFLEKLNDEILDRIIHHTSFVEMKDNP     |
| Q5E9L0 | AGASLCLIGGVIFCFISISDNNKAPRMGYTYNGATSVMSRT    |
| Q96CT7 | RAAFTAFEEAQLPRLKQENPNMRLSQLKQLLKKEWLRSPDN    |
| P82348 | LYAKEIRSRVDSLLLQSTQNVTVSARNSEGEVTVGRVKVGA    |
| Q91ZT9 | KEDSCFELLHRAVGFELRKNGIMPREVTKDQQLCEKLTVL     |
| Q5KR47 | KLEEAKEAADESERGMKV IENRALKDEEKMELQETIQLKEAK  |
| Q96EY4 | REAHKQEKKELKNEKALRLNLVGEKQWQFNHLDPQKKRY      |
| Q9Y296 | GQRDGIRVGHAVLAINGMDVNGRYTADGKEVLEYLGNPANY    |
| Q8BVZ5 | LSTYNDQSVSFVLENGCYVINVDDSGKQEQDQVLLRYYES     |
| P15949 | QHRLVKSFLHFGYNRSLHRNHIRHPEYDYSNDLMLRLLSK     |
| Q4JM65 | TWFQNRMKCKKWQKNNWFRNSNGMPQGFAMAEPGFYSYH      |
| Q9Y624 | SLALGSVTVHSSEPEVRI PENNPVKLS CAYS GFSSPRVEWK |
| P50876 | CPKCKVYIERDEGCAQMMCKNCKHAFWCYCLES LDDDFLLI   |
| Q9BVC5 | VFDGSSTSTS IKVKK TENDNDR LKPPQASFTSNAFRKLS   |
| Q0VD59 | DATSARVYRSKTKEKEREQNEKTLGHSMSSHSSNISKAGGS    |
| P33792 | ISAEPADIISSGEQVKIKINKNYTPVGGDRIFGINFSFDT     |
| O89116 | LEAGYQIAVETEQIGQEMLNLSHDREKIQRARDRLRDADA     |
| Q3ZBK3 | KEEERMVEMFLEYQNIQRQNKLIQEKKENLLKLI AEVKDK    |
| Q8NET5 | RLAGGQSVTHTGLPIMASLANTAISFSCRITYPYTPQFKVF    |
| Q3KPI0 | SVVLTCHTNNGTGSFQWIFNNQRLQVTKRMKLSWFNHLTI     |
| P04229 | NSQKDLLEQRRAAVDTCRHNYGVGESFTVQRRVEPKVTVY     |
| Q2KIU7 | MDSLEHDI PKGSWSVQMERGNALVVLRSLLWPGLTFYHAPR   |
| P20827 | SLAAADRHTVFWNSSNPKFRNEDYTIHVQLNDYVDIICPHY    |
| Q9H741 | SLVYFLSSTFKQEERAVRDRNLLQVHDHNQPIPWKVQFNLG    |
| Q5E9I1 | LQLYSSLQENVPHERKSSLNFERLEAQLKACYCRIIFSKA     |
| P00416 | LLASGVSITWAHHS LMEGKRNHMNQALLITIMLGLYFTILQ   |
| P13135 | SGTIGSSELPGAFAAGFRLNEHLYNMIIRRYSDDEGGNMF     |
| Q2TBU3 | GMLKSIQSKMNTLANRFPVAVNSLIQRINLRKRRDSLILGGV   |
| Q8IWD4 | DDDCPVRKKRITEAELCAGPNDWILCAHQDV EGHGVNPSVS   |
| Q53R12 | LMAIPATTMSLTARKRACNNRTGMFLSSLSFVITVIGALY     |
| Q3SZW3 | FIGIFAFWLWERPIRAKEKLNFTLLKALLSSYGKLLLIP      |
| Q9NVZ3 | ESVLCVKPDVHVYRIPPRATNRYRAAEWQLDQPSWSGRLR     |
| Q9WTP6 | VSDVMVELIEKNLETPSCKNGFLLDGFPRTVVRQAEMLDDL    |
| P43407 | EKLGPAIKSTDVYTEKHSNLFKRTEVLA AVIAGGVIGFL     |
| A7E2S9 | TMDLNIRDARKRTALYWACANGHA EVVTTLLVDRKCQLDVLD  |
| Q9H9Q4 | AKELNKRLTAPPAFLCHLDNLLRPLLKDAHPSEATFSCD      |
| Q9UJQ1 | TCLMAEFAAKFIVPYDVWASNYVDLITEQADIALTRGAEVK    |

|        |                                             |
|--------|---------------------------------------------|
| P07628 | PGFNMSLLTLKEIPPGADFSNDLMLLRLSKPADITDAVKPI   |
| P56857 | NVAYRPGGFKASTGFSGNTRNKKIYDGGARTEDDEQSHPTK   |
| Q9CR58 | RDGRCAGYKGTLDCLLQTWKNEGFFALYKGFWPNWLRIGPW   |
| Q60660 | SKEESQQIGDRPSKLDASAARNSVFNQRKQAYLSSFSSTEEDD |
| P0DMM9 | SFFMRKGMAGDWKTTFTTVAQNERFDADYAEKMAGCSLSFRS  |
| Q9P0G3 | LLLTLALQVLAIAMTQSQEDENKIIGGHTCTRSSQPWQAALL  |
| Q60961 | AVNIQYEVIGNYSSERMADNACVLFAVSVLMFIISSMLVY    |
| P25732 | EVYRVYFEAVKPDSENVINDNKKLTTELSVNIYAALIRSL    |
| Q9Y2V0 | SFGDECSHHAYLHDQFWSYWNRFPGPLVIYWYGFIQELDCN   |
| P50194 | AVDFTHYDEKNNEWNLLQVKNRDNTESSSSKIRDNTTIKK    |
| B9A014 | YLNPLDSAWSSLKWFIIINNRNEFCLQSIDSGYSYQCILFSN  |
| Q8C767 | GMVAPAVQEKKVKKRVSFADNQGLALTMVKVSEFDDPLDI    |
| Q9NQ31 | GPGGSYQISEHAPEASQPAENISKDLYTEVYPGTYSVTVGS   |
| P29084 | KKTKVEHGGSSGSKQNSDHSNGSFNLKALSGSSGYKFGVLA   |
| Q9CQT2 | KLKQFAFVNFKHEVSVPYAMNLLNGIKLFGRPKIQIFRSGS   |
| Q3TCJ8 | KEGRILEGRHEEAGVQPQTSNAQEKVSLSDCIQEAKASLQN   |
| P22005 | EGDTLANSSDLLKELGTGDNRAKDSHQQESTNNDDEDMSKR   |
| Q921N7 | VRCFHTQVDKPENGRLIYTGNLARTIFGVKCFYSYSTSVVSL  |
| Q9P015 | AKVNIQVQLASELAIAAIEKNGGVTTAFYDPRSLDIVCKP    |
| Q9P299 | LAKYYDDTFPSMKEQMVFEKNVFNKTSRTESEIAFFGGMTI   |
| Q9BZJ3 | SETFPPGMPWCWVTGWGDVDNNVHLPPPYPLKEVEVPVVENH  |
| Q810M6 | DILNPHKDHGLRAEPRDKENRQTLFYSYSINHPCFAEIED    |
| O43399 | TSAALSTVGSASIRKLGDMRNSATFKSFEDRVGTIKSKVVG   |
| P97461 | VAETPDIKLFGKWSTDDVQINDISLQDYIAVKEKYAKYLPH   |
| P50592 | KTLGQKIESWESSRKGHSFLNHVLFNRNGELVIEQEGLYIYI  |
| Q9BXT2 | TLAVLSVGTEFWVELNTYKANGSAVCEAAHLGLWACTKRL    |
| O75558 | VSGDQIEDMFEQGWKWDVFSENLLADVKGARAALNEIESRHR  |
| A6QNL6 | CVLERQIFDFLGYQWAPILANFVHIIIVILGLFGTIQYRPR   |
| Q9D8X5 | VRPIGEFRSSIDYQYQLLRCNVLLKIIQLGLTFTNEKGEY    |
| Q8R0W6 | RDEDFVGRDDFDDTDQLRIGNDGI FMLTFFMAFLFNWIGFF  |
| Q8BRU4 | HNWIQNGKSCYYVFERWEMWNISKKSCLKEGASLFQIDSKE   |
| Q3UGC7 | RLKKLQEESDLELAKETFGVNNTVYIDAMNPSSRDDFTEF    |
| Q8K2J7 | INENSDTVGQIVQYIMKNEANADILKAMVADNSVGDIESPV   |
| P0CH99 | LLTHSGKKPCVSKQCGKSLRNLLSPKPRQIHTKGKSYQCN    |
| Q9QZN4 | RNLLRNPCAENLSSWRIDSNNGDRWKVETLPGSCGTSFPD    |
| Q8BTF8 | AQKKQLEESIELIQDECVSENADHSTEEPAEGGQEADGGEM   |
| Q8TCD6 | DVAMPKGYTLQKTLSRMSQNLEPMEYSVVVWSSGVDIISH    |
| P01236 | CQVTLRDLFDRAVLSHYIHNLSSEMFSEFDKRYTHGRGFI    |
| P31041 | AGVLCFYGLLVTVLVCVIWTSRRNRLLQSDYMNMTPRRPG    |
| Q13432 | FTVGDKPVNNFRMIERHYFRNQLKSFDFHFGFCIPSSKNT    |
| Q0P565 | VKQLDQCEMILQASEYEDLENKPGRLQDFYDSTAGKFSHPE   |

|        |                                             |
|--------|---------------------------------------------|
| Q08DE6 | GPNGTAGIFATYPSGHLDMVNGFFDQFIGTASLIVCVLAIV   |
| P42216 | ESGTDRLVEVMHKVEADYINLQGDPEMIRPRDVELLQGM     |
| Q6PE84 | IILVLP CIDVFVKVDLRTVTCNIPPQEILTRDSVTTQVDGVV |
| Q5GJ75 | KDLVHELVRHLTPRTHGRINHFVNFHADVEFLSTLYSLDG    |
| Q3KNI6 | GPPKAKESKAIPEPRSDESENIWNPEEVPEGAEHDDIWDVR   |
| Q2KIN3 | SYCSNWRCPTRVQEDQQR TINIKCGGLREFSQRVFCGAPP   |
| Q1LZ96 | DTDVVCYRVEEPETLVELQRNEWDPVISWAEKRYGVEIGSS   |
| Q8IWL3 | PTGVPRRRPLSCDAASQAGSNYPRCWNGGPGWPGREDRFF    |
| Q9QZL9 | LPLAFVSSSALPIHDVDSQQNTSGFLGLQRLLOSFSRFLFK   |
| Q15194 | ELSKVIIVDNSPASYIFHPENAVPVQSWFDDMTDELLDLI    |
| Q9UBQ5 | AKENAYDLEANLAVLKLYQFNPAFFQTTVTAQILLKALTNL   |
| Q9WTY4 | AGAGILYWLAPGNARGNLAVNALSNNTPGKAVVVELILTF    |
| A6NJY1 | CLSIVFYSGGMINNAIASLRNVCISLLAGIVLGFVRYFPS    |
| Q99NH8 | PCQRVVSTHGVWLLAFLLKKNRSTVIADDTLAGTVTITLKN   |
| Q1JQ93 | REKKLGLGTAYIHGMKHATGNYIIIMDADLSHHKPIPEFI    |
| P28070 | GGVVIADMLGSYGLARFRNISRIMRVNNSTMLGASGDYA     |
| Q9Y624 | QDGSPPSEYTWFKDGI VMPNTPKSTRAFNSSSYVLNPTTGE  |
| Q66JT5 | LEKPHFDCRSAIFELDSCNGKVLVYKNGKPLAHDTEI       |
| P20108 | IALRGLFIIDPNGVVKHLSVNDLPVGRSVEETRLRVKAFQF   |
| Q2KIE2 | RDEDEDEEEEEEGVTWGRGNSRFEGPQSPEEFSFGFSFSP    |
| Q9UFF9 | ILNLFPPSIYDVKYLKMSCKNLKGLQEVADQLDLQRIGRQ    |
| P14207 | LLLLVCVATMCSAQDRDLDLNVCM DAKHHKTKGPEDKLHD   |
| Q9H2P9 | THSDLVLRATKLGIPYRVIHNASIMNAVCCGLQLYKFGET    |
| Q9P0W0 | QNLRHLSSMSNSFPVECLRENI AFELPQEFLQYTPMKRDI   |
| Q8BGS0 | FEDMDKLN TDSEEDQDDESSNDEEAHKAKHKGKAPLKGPLR  |
| O75934 | QLEHQAVRIENLELMSQHGCNAWKVYNENLVHMIEHAQKEL   |
| P38573 | AFRTENSADY PWPQRCCVMNSLKEPLNLDACKLGVPGYYH   |
| Q9ERQ8 | PDGLAVVGVFLETGDEHP SMNRLTDALYMRFKDTKAQFSC   |
| Q91VH6 | EHLDKMGMSIIEQLDPVSFSNYLKKYHNTICGRHPIGVLLN   |
| P0DMB1 | DDFSLEFHAQDGDISDMRRENVPFSPAEEGKAAPLYQQPLM   |
| Q9WU03 | EECLDKCAGVTENTTDDMARNRNGADSSVLSVPRKQSAEDL   |
| P08865 | LDFQMEQYIYKRKSDGIYIINLKR TWKLLLAARAIVAIEN   |
| Q71SS4 | SFWFGTRFKACYLPWVILGFNYIIGGSVINELIGNLVGHLY   |
| P29020 | VLEKKRARDPEMGGKQRRRN PQEGVYNALQKDKMAEAYSE   |
| P97371 | HPEAQAKVDVFREDLCSKTENLLGSYFPKKI SELDAFLKEP  |
| A6H7B8 | WNHYSCTSPCAGYRPLCRLNFGLNVVENVALLVLYTVSSS    |
| Q8VCC1 | TYLGLDYMSKQNGGEGGI IINMSSLAGLMPVAQQPVYCASK  |
| O43633 | LLFGRRKTPEELLRQNRALNFRAMRELDRE RQKLETQEKKI  |
| Q9D3X5 | SLTSSPEAARRARPRPSDKLNPKTINPFGQPRAPTAFAAI    |
| Q32L77 | VHRKCRSQFTDLDGSKRVGIN TWHDESGIYANSYVKKRLYS  |
| P08217 | GDPTYPPYVTRVVGGEARPNSWPWQVLSQYSSNGKWYHTC    |

|        |                                            |
|--------|--------------------------------------------|
| Q9H560 | LFAINSRRQQIVEFLLKNQANLHAIDNFRRTALMLAVQHNS  |
| A5PJN0 | RIWRKYDADSSGFIISAAELCNFLRDLFLHKKAKISEAKLEE |
| P81125 | KIEEACEIYARAANMFKMAKNWSAAGSAFCQAAHVHLQLQS  |
| P23184 | REQWKCDGVFVSHIIDIKDNNINVSdstLIWLHLENYHSDI  |
| Q8C8M1 | LKTTLPKPKVKTLSGNRMKSNQISKLQKEFKRHNSDAHSTT  |
| P47803 | LEVLAvgTVLLVEALSGLSLNLTILSfCKTPELRTPSHLL   |
| Q56P03 | CLDCQRHESYKTQYRAMFVMNCSINKEEVLRyKASENRKKR  |
| A0PG75 | LIIIHQQVELLGMILGTETSNKYEIKNSLGQRIYFAVEESI  |
| O60248 | RPMNAFMVWSSAQRQMAQQNPKMHNSEISKRLGAQWKLLD   |
| O43763 | RAALAKALRMTDAQVKTWFQNRRTKWRRTAEEREAEHRHA   |
| P0DML2 | EDGSRRTGQILKQTYSKFDTNshhdALLKnyGLLYCFRKD   |
| P0CI00 | HTGERPYKCHQCGKAFIQSFNLRRHERTHLGQKCYECDKSG  |
| Q5T6M2 | AVPVPHTTWGSLIPIDSQRNKERTFRFTWMDGPPHGGGLGTR |
| Q9WV35 | HAEEAFFNTILPAFDPALKYNVTWYVSSSPCAACADRIKLT  |
| Q6UXX9 | KRASVSNPICKGCLSCSKDNGCSRCQQKLFfflRREGMRQ   |
| A6NKC4 | LALRCHAWKDKLVYNVLYRNGKAFKFFHWNSNLTIKLTNI   |
| P57796 | SRKRTGSSGEQTGPEAPGSSNPPSTGEGPAGAPPASPGPA   |
| P62258 | DTLSEESYKDSLIMQLLRDNLTLWTSdMQGDGEEQNKAL    |
| Q9CY64 | ISIHFKSGSLEEVpNvgvNKNIFLKDQDIFIQKLLGQVSAE  |
| Q6BCY4 | LQDPEAKYPLPLIEKEKISHNTRFRFGLPSPDHVLGLFVG   |
| O14593 | AADGSDTVVLSLFPCTPEPVNPEPDASVSSPQAGSSLKHST  |
| Q9BZM4 | PYLLFDWsgTGRADAHSLWYNFTIHLPRHGQQWCEVQSQV   |
| Q9BUJ0 | YGELDHILARESLRQLRHLPNHSVVKLRNAGHACYLHKPQD  |
| Q3SYR2 | PEDVLGLQRITGDYLCSPeeniyKIDFVRFKIRDMSGTVL   |
| Q8TCD6 | SNGHLTVENYHThSCNRCpKNLCKKVVLIeFVdKlQlQqGVN |
| Q8IUW5 | RCTTEAEQDIEEEKVEKIElNDSVnENSdTVGQIVHYIMKN  |
| Q9DCH6 | QETNHSQAPMLCSTGCGFYGNPRTNGMCSVCYKEHLQRQNS  |
| Q9QXN5 | LQDPRYStELGMYQPHCGLENVlMSWGHDEYLYQMMKFNKF  |
| Q8BFY6 | SVDADHSGYISLkELKQALVNSNWSSFNDETCLMMINMFDK  |
| P21845 | NDEPLPPPYPLKQVKVPIVENSldCRKYHTGLYTGDdFFIV  |
| O43396 | LTEDDIKEDGIVPLRYVKFQNVNSVTIFVQSNQGEETTRI   |
| O08547 | SKANNLSSLSKkyRQDAKYLNRSTYAKLAAVAVFFIMLIV   |
| O14817 | AATQGSFATLSSSFPSLSAANLLIITGAFVMAIGFVGLGA   |
| P63101 | RYDDMAACMKSVTEQGAELSNEERNLLSVAYKNVVGARRSS  |
| Q5PR19 | PLETQGNPTSPRYNPRPLEGNVQLKSLTENNQTDKAQVHAV  |
| Q9D563 | SSHSGLWRTCRVQSSCTPLMNPfWQENVTVSDSSRQLLTMH  |
| Q8BWR2 | EERTDRSKFVESDADEELFNIPFTGNVKLGVIIMGEDDD    |
| Q14088 | SSLDQYVQIRIFKIIIVIGDSNVGKTCLTFRFCGGTFPDKTE |
| P38447 | NRSSCDFHEDDSVHAYHRATNADYRGSGFDRGHAAAAANHR  |
| Q2KIR1 | AMPPQQLMPGQMPPAQPLSENPPNHILFTNLPEETNELML   |
| Q4JM65 | MQELSNILNLSYKQVKTWFQNRMKCKKQKNNWPRNSNGM    |

|        |                                              |
|--------|----------------------------------------------|
| Q6P073 | KLIFPREFPFKPPSIYMITPNGRFKCNTRLCLSLITDFH PDT  |
| Q5E9I1 | LGCVGLSCFYLAVKSTEEERNVPLATDLIRISQYRFTVSDL    |
| P20340 | GEQSVGKTSLITRFMYDSFDNTYQATIGIDFLSKTMYLEDR    |
| Q92629 | PTRSLVMEAPKGV E INAEAGNMEATCRTELRLLESKDGEIKL |
| P08637 | PKATLKDSGSYFCRGLFGSKNVSETVNIITITQGLAVSTIS    |
| Q6Z79  | KCYECDKSGKAFSQSSGFRGNKIHTGEKPHACLLCGKAFS     |
| Q8R2U4 | IPPTVDGMLGGYGHISNIDLNSSRKFQRFLEGNKKTGTS      |
| P00642 | FLTENISITRPDGRVVNLEYN SGI LNRLDRLTAANYGMFIN  |
| O60762 | RELEVRSPRQNKYSVLLPTYN ER ENLPIVWLLVKSFSESG   |
| Q3T0F5 | KVLLKVII LGDSGVGKTSLMNQYV NK KFSNQYKATIGADFL |
| Q9BRJ7 | VRVPLYTQKDRVGGFPNFLSNAFVSTAKQLLFALKVLNMM     |
| P57776 | PGGDHSELIVRITSLEVENQNLRGVVQDLQQAISKLEARLS    |
| Q0IIC4 | SSEVGQRRTKREGNEYKMPNRRNMYAVQNN SAGPYFNPRS    |
| Q3TQI7 | QEEQKAKPKNAEDCLYELPENIRVSSAKKTEEMLSNQMLSG    |
| Q7L2Z9 | QILASEVEEEEEERVKMHQINSSGVLSLPELSQTKLAPTLL    |
| Q9QZM8 | LRVRLLEDEYENEVVKFSASP NVLQWTERSQRVSHVFTNF    |
| Q810M6 | SYSINHPCFAEIEDTLSSQINESLRWDGILT DPEAEKERIR   |
| P05231 | AITTPDPTNASLLTKLQAQNQWLQDMTHLILRSFKEFLQ      |
| Q9TVC8 | GLCYFTNGTERVRYVTRYIYNQEENVRFDS DWDEYRAVTPL   |
| Q8IYI0 | RGQESQKYALRSFQMARVIFNRDGC SVLQRHSRDTHFYPLE   |
| Q9NQY0 | AKLHQAREELRPVREDFEAKNRQ LLEEMPRFYGSRLDYFQP   |
| Q9UBY8 | TCVSWMLLKAGWSESLFWKLNQWLM IHMFHCRMVLT YHMWW  |
| Q08E20 | AETGKCPVLYWLSGLTCTEQNFISKSGYHQASEHGLVVIA     |
| Q00286 | HFGESHKPSSEIIMRMAEELNLEKEVVRVWFCNRRQREKRV    |
| Q3SWY9 | SVVKKVSESE TQPLVALVGNKIDLEHMRTVKPEKHLRFQ     |
| Q9UNN8 | RLHMLQISYFRDPYHVWYQGNASLGGHLTHVLEGPDTNTTI    |
| P57052 | ESVSYAIALLNIRLYGRPINVQYRFGSSRSSEPANQSFES     |
| P53519 | FNNIVEKLVKWHKNGKYLVLKNNTPYYISFSEVFFDS DKVNN  |
| Q99623 | IKLRKIRAAQNISKTIATSQNRIYLTADNLVNLQDESFTTR    |
| P04769 | KLGVIMRKEFFMNSFSSETFNKIILDHLKSTENITKAFNSC    |
| Q920C4 | PLWGAVFFISSGSLTVAAGRNPTRMLMQNSFGINIASTTIA    |
| Q9MZ13 | QLHTHVNDGTEFGGSIYQKVNEKIETSINLAWTAGSNNTRF    |
| Q9HDB8 | KEIPKESKNT EVLVWEECVANSAVILQNN EFGT IIDWAPRG |
| Q8NDB6 | CECRYCQSHRPNLSGIPGESNRAPHSSWETLVQGLSGLTLL    |
| Q9P126 | LSRQKSNEVWKWEDGSVISENMF EFLEDGKGNMNCAYFHNG   |
| Q9CZJ6 | ARCRRPLGDSL TWASQEDTNCILLRSVSCNVSDKEPKLS     |
| Q96BQ1 | PTKEIQVKKYCGLIKPCFANYFAFKICSGAANVVGPTMCF     |
| O75360 | RHRTTFSPVQLEQLES AFGRNQY PDIWARES LARDTGLSEA |
| Q2KIN3 | YSAAFQIDGHWMHYDGLRNVN LILLNKPP E FLLLSLVYIR  |
| Q9JHE6 | VHTFVSTCQAI DATVSAELLNHLESMP LREGSSFDLLGD    |
| Q3SZ18 | CVLKGGYKFFADLLDYIKALNRNSDKSIPMTVDFIRLKSYC    |

|        |                                           |
|--------|-------------------------------------------|
| P28651 | VEWGLVFPDANGEYQSPINLNSREARYDPSLLDVRLSPNYV |
| Q00187 | YWGPIEHGKGFELKAYTANKGRVSAIQIPALKEETYGR    |
| P59539 | SNWPATSLSIFYLLKIANFSNLI FLRLKRRVKSIVLVLLG |
| Q06323 | VHELDEAEYRDIRLMVMEIRNAYAVLYDIILKNFEKLLKPR |
| Q9ERQ8 | YEACMSLSITNNGHSVQVDFNDSDDRTVVSGGPLEGYPYRK |
| P27792 | AFaelRkLlPThPPDRkLSkNEVLRlAMkYIGfLVrLLRDQ |
| A0PJX2 | RWRYTRLPSQVEDTLSGEEGNEEEEEEAAPDAAAPEPT    |
| P46926 | GSSLVSRTRVKTLAMDTILANARFFDGLTKVPTMALTVGV  |
| Q96CS2 | DSVALETKDTSLASFIPAVNDLTSDFRTKSKSEEIKIEL   |
| Q8SPU8 | RERLVATAVKLHGGVDILISNAAVSFFFGSLMDVPPEVWVK |
| Q14201 | CEVCCRYGKKNNAFIVASFENKDEKDEISRKVTRALDKVT  |
| P18121 | PENREEVHETKTEDLLKAMINVSISWKEPLKHLVSALTALP |
| Q58DS9 | NWVKELQRQASPNIVIALAGNKADLASKRAVEFQEAQAYAE |
| Q61451 | KLNTLVAEGLNDSIQHYHSDNSTMKAWDFIQTLQCCGVNG  |
| C9JJ37 | VKELRLALLAPAELSALEEQRQEPLIPVEQIVEAWKCHAL  |
| Q9Y277 | ETKYKVCNYGLTFTQKWNTDNTLGTEISWENKLAEGKLTL  |
| Q96EY4 | LNASNLKTFREWDFDLKLPNIKMRKICANDAI PKTCKRKT |
| P63046 | YRFLPSDLHNGDSKVIYMARNPKDLVVSYYQFHRSLRTMSY |
| A5PJT0 | RSLPEYLYSSGLLRDRAARDNAACRPLLAVATHVHFDHSGG |
| Q3YBM2 | LAVCVLKVIVSLVSLGVGLRNLCGQSSQFLNEEGSEKRLLG |
| Q32LM6 | PGGVAERHGGLKRGDQLLSVNGVSVVEGHEKAVELLKAAK  |
| Q3MHP2 | RWLKELRDHADSNIIVMLVGNKSDLRHLRAVPTDEARAFAE |
| O00233 | MSRKLQSESQGPPRAFAKVNSISPGSPASIAGLQVDDEIV  |
| Q7Z5A4 | CISSRFHYSVKMGDRSVYNTSVVVSQRAFVHPKFSTVT    |
| Q9UBS3 | FTSGKGQRGSGSFEQSFNFNFDDLKDFGFFGQNTGSK     |
| P31268 | LAKGACDKTDEGALHGAAEFRIYPWMRSSGPDRKRGRQT   |
| O14893 | TVRQNVNKHRSHWKSQQLDSNVTMPKSEDEEGWKKFCLGEK |
| O95571 | TLNPRLTLSCFEFVKIMGNLNLPKPQQIDFAVPMNRCGVQ  |
| Q8BYP3 | PSVFEKYTASVTGNKEVTLNLYDTAGQEDYDRLRPLSYQN  |
| Q9JI59 | GTSLGNPKGGTHNNSYTMNTKSGILQFNMISKMDSGEYY   |
| P81126 | YAAQLEQYQKAIIEFEQIGANTMDNPLLYSAKDYFFKAAL  |
| Q80WR1 | TDVFSATWNSVMITFGCCGVNGPEDFKLASVFRLLTLDTEE |
| Q9WTN0 | YRYLLQLPGKQVRSKLSQAFNHWLKVPEDKIQIIIEVTEML |
| Q9CZX7 | PCNCLLICKDTSRRIGCPRPNCRIINLGPVMLISEEQPAQ  |
| P07628 | TKWQKDDLQCVFLKLLPIKNCIENHNKVTDVMLCAGEMS   |
| Q2TBU3 | RMFETMAIEIEQLLARLTGINDKMAEYTSAGVPSLNAALM  |
| Q6PHW0 | HNHYPEKEMVKRSQEFYELLNKRRSVRFISNEQVPMVIDN  |
| Q47427 | NSELIAIQAGNIIVYNYDGGNREYISASTEYLAVGVGIPAN |
| P49888 | LVDRIIHHTSFQEMKNPSTNYTTLPEIMNQKLSPFMRKG   |
| Q9H0U4 | QESYANVKWLQEIDRYASENVNKLVLGNKSDLTKKVVVN   |
| P33783 | LRHMQDQPVYTGVDLNLNGLPGESTAMKTSDIPGTLQT    |

|        |                                            |
|--------|--------------------------------------------|
| Q9NSE7 | SPLIMKQIIIFCEHSSDFGWNGYGYAVALLVVVFLQTLILQ  |
| Q8BYP3 | RLRPLSYQNTHLVLICYDVMNPTSNDVLIKWFPEVTHFCR   |
| O08602 | ATEVGECLTQPLKDLKQKLRNKVSNTKVDTHKTNQGYPHLQV |
| P42574 | PVEADFLYAYSTAPGYYSWRNSKDGSWFIQSLCAMLKQYAD  |
| Q9QZM8 | LYALAQRCPADADADADAGNRHDEFPCALARFCLRAPFG    |
| Q3T0Y3 | SPRVVKTHLPIDLIPKSFWENNCKIIYLARNAKDVAVSFYH  |
| P50615 | RCIRVNKFQRVDPDLKACENSILYSDLGLPKELTLWVDP    |
| Q8NAJ2 | PCLGPDCLLCTQGCELHEGRNHMAVHSCVARAWPGDPQEV   |
| P12970 | EAIRTNYNDRYDEIRRHWGGNVLGPKSVARIAKLEKAKAKE  |
| Q58CY8 | RGNLTREFFTKELTKHYQGSNDTDVFSATWNSVMITFGCCG  |
| Q8N565 | QKEADSLLSVTKLSTISDSKNTRKAREMLLKLAEEETNIFPT |
| Q5SSG5 | VAVLGARGVGKSAIVRQFLYNEFSEVCVPTTTRRLYLPAVV  |
| Q9QWV4 | HDRGHVIRKSKNNKTGDEEVNQEFINMNESDAHAFDDEWQN  |
| Q2KJ84 | ARDRNIQESNFDRVNFWSMVNLVVMVVVSAIQVYMLKSLFE  |
| Q6UXP7 | GIKLDFKSLAVVEPSMMLLENVKRHLKRPVWINADILPGPN  |
| Q9NQ60 | NGTESEISVRATTDLNFALKNDKTVNATYKSTIEEETTT    |
| Q9D9F8 | DEAIAHVKHEMSLKMLENINPKENDMTLQELLDRIINNADT  |
| Q8NGN8 | YPLLKLACTDTHVIGLLVVANGGLSCTIAFLLLLISYGVIL  |
| Q9D8N6 | SNTYVIKLFDRSVDLAQFSENTPLYPICRAWMRNSPTVRER  |
| Q50H32 | LARTASEKAFGTRRVNLSKNGTVRGVKYKVSAGQALFNNL   |
| A3KN24 | LTGRLMFMGKIILILLQGDRNDIKEYLILQKTCKVDVDSG   |
| Q04323 | SLIEMGFPRGRAEKALALTGNQGIEAAMDWLMHEDDPDVD   |
| Q3ZCK9 | LNEDMACSVAGITSDANVLTNELRLIAQRYLQYQEPIPCE   |
| Q0P565 | VSDHMYRMAVMALVTKDEHLNKDRCVRLALVHMAECIVGD   |
| Q9HC57 | RQITRALCLLLLLHAGSAKNIWKRALPARLAEKSRABEAG   |
| Q9CWT3 | NALLVQLPELPSKNLFFNMNRQHVDQRRQGLEDFLRKVLQ   |
| Q14749 | KNIYYKSDLTKDVTTSVLIVNNKAHMVTLDTYTVQVPGAGQD |
| P31273 | RIEVSHALGLTERQVKIWFQNRMRKWKKENNKDKLPGARDE  |
| Q9NVT9 | EEDALSVVNQLRDLAADPLNRRAIVQDQGCPLGLILFMDH   |
| Q8C3X2 | VKQQLTNETSRIRADNKLDINLERSRVTDQEKQLIEA      |
| Q3I5F7 | ITKSGFLTfMDTWSNPLEEHNHQSLVPLEKAQVVPFLFIVGM |
| B2RXH8 | PPPPPIALAVVPSKRQRISGNTSRRGKSGFNSKSGKRGSSK  |
| Q9BSN7 | GLVTFYRIGPYTNLSWSCYLNIGACLLATLAAAMLINILH   |
| Q3SZR3 | MDLLSGKWFYIGSAFRNPEYNKSARAIQAFFYLEPRHAED   |
| Q8BQN6 | GKSNLTEHEKIHIGEKPFKNECGTAFGQKKYLKHKQNIHT   |
| Q9R1P1 | LWEPNMDPEHLFETISQAMLNAVDRDAVSGMGVIVHVIEKD  |
| Q9D3J8 | PLFPGAIPPSGQAGTKPDVQNGVLPTRQAGAKAVNQGTTPG  |
| Q3SZJ9 | VEKDGYKTIYFFGDKTMPGGNDHEIFTDPRTVGYTVAAPED  |
| Q9H4Y5 | PYSHRTRVLKAKDIRHEVVNINLRNKPEWYTTKHPFGHIP   |
| Q9BXU9 | FMTILGPKLVSEGRDGLGNTIDSIFWQFDMQRITLLEELK   |
| Q78PG9 | FHRQKDVKIVTVEKKVNEILNRLEKTKLEKFPDLAAEKEGR  |



|        |                                               |
|--------|-----------------------------------------------|
| Q8IVQ6 | HHCSRGCVCRRMDHHC PWINNCVGEDNHWF LQLCFYTEL     |
| P97428 | KERSFSEDLV LGWRESFDLLNSKNGVAAFHAF LKTEFSEEN   |
| P07992 | SNSIIVSPRQRGNPVLKFVRNVPWF EFGDVI PDYVLGQSTCA  |
| Q2KI30 | VLI FG TLYPAYSSYKAVKTKNVKEYV KMMYI WIVFAFFT A |
| Q5E993 | YINEHDYAKAAFCLEELMMTNPNYHLYCQQYAEVKYTQGG L    |
| Q9BUN5 | SFLTEVTDVYEMEGGLNLLNDFHSGRLQAFGKECSFEQLE      |
| O95073 | NKHSVIVEKNRCWDI IAVNYNAIGVDRP PRTAQGLRTLYKR   |
| P68002 | KLTRNNFAVGYRTGDFQLHTNVNDGTEFGGS IYQKVCEDLD    |
| Q5SSH8 | TKGMEANEQE QREKQKFP PCNSEWSSAKGSR LWC SQKSGGV |
| Q2TBV3 | AEKEKVDLVLLGKQAIDDDCNQTGQMTAGFLDWPQGT FASQ    |
| P68510 | LETVCNDVLALLDKFLIKNCNDFQYESKVFY LKMGDYRY      |
| Q9BG79 | AKPVTELVCSGCGPARLLPNAIGRGKWRP SGPDFRCIPD      |
| P15327 | GEGQWNKENRFCSWVDQKLNNDGLEEARNCGRQLKALNFEF     |
| Q6ZUS5 | SASRYAEQISVLKTALLQKENIQSS LKRKLQAMRDI ALKE    |
| Q60652 | TGVKHWFCYGTCKCFYFIMSKNTWSGCKQTCQHYS LPLVKIE   |
| Q9D1B9 | PESQQGLWGGGLILGYRYANNDKLSKR VKKVWK PQLFTRE    |
| P06342 | EGGNSERHFVAQLKGECYFTNGTQRIRSVNRYIYNREEWVR     |
| Q3ZCC4 | EFASESSRSLTEEEQQR IERNKQLALERRQAKLLSNSQSLG    |
| O55135 | NRHGLLVPNNTDQELQHIRNSLPDSVQIRRVEERLSALGN      |
| Q14761 | LWASPPGRWLQARAELGSTDNDLERQEDEQD TDYDHDVADGG   |
| P00766 | QK LKI AKVFKNSKYNSLTINNDITLLKLSTAASF SQT VSAV |
| Q9NWX6 | PSNQTLKDYLSWRQADCHINNLYNTVF WALIQSGLTPVQA     |
| P70677 | KNFHKSTGMSSRSGTDVDAANLRETFMGLKYQVRNKNDLTR     |
| Q8WU20 | ERRRGASPRGGGLI LLDLNDENSNSQSFHSEGLQKGTEP      |
| Q9H1Y0 | SQVINEMQKDKHKQLWMGLQNDRFDFWAINRKLMEYPAEE      |
| Q5JUQ0 | TETCTIVGPTKRDSKFIISMNDNFYPSVTWAVPVSESNAK      |
| Q8VBV7 | PVAVMADNAFSFRKLLDQCENQELEAPGGIATPPVYGQLLA     |
| P62995 | RHSHSHSPMSTRRRHVGNRANPDPNCCLGVFGLSLYTTERD     |
| Q96DG6 | PVDAGKAVIVIQDIFGWQLPNTRYIADMISGNGYTTIVPDF     |
| Q5E997 | IHAPPGEFNEVFNDVRLLLNNDNLLREGAAHAFAYNLDQF      |
| Q8N5J4 | GKRKGNRKTMTYQKMARALRNYGRSGEITKIRRKLYQFSE      |
| Q8WWZ3 | LLDVIRIKLDPCHPTVKNWRNFASKWGMSYDELCFLEQR PQ    |
| Q8K3V1 | YIYQMRPLVPRNTVSKSIKNNIRLSELLSNPNVLSNELKI      |
| P97299 | KSVLWLKDSLQCTCEEMNDINAPYLVMGQKGGELVITSVK      |
| Q8CGF5 | FQILFHFVSYWFSARVSSGYNSLSIDKIEWNSRVVSTCHS      |
| P52907 | TVSNEAQTAKAFIKI IENAENEYQTAISENYQ TMSDTTFKA   |
| Q9JK39 | EGMELRWYRDKPSSVVHVYKNGEDVYDEQMV EYKGRTSFNG    |
| Q2TA29 | VVLIGDSGVGKSNLRSRFRTRNEFNLESKSTIGVEFATRSIQ    |
| P04095 | TIKNVPDIIISKATDIKKKINAVRNGVNALMSTMLQNGDEE     |
| P04390 | IGYVYTRVATRKS SLKTYNINELNEIPKPYKGVKVF LQDKW   |
| Q9ULZ2 | MLQKNPSLGNMILRPGSDSRNYSITIRQEIDIPRIKHYKVM     |

|        |                                            |
|--------|--------------------------------------------|
| P08884 | RYCGGFLVQDDFVLTAAHCRNRTMTVTLGAHNKAKEETQQ   |
| Q9NXJ5 | VVHVGVSGMATTVTLEKCGHNKGYKGLDNCRCFPGSQCCVE  |
| Q9CZ92 | VFPKLDLLTKVPERALGLDKNRVIETAPLSFRSLLGVLGIE  |
| Q9D035 | AALQRQIFDFLGYQWAPILANFLHIMAVILGIFGTVQYRSR  |
| Q9BPW5 | QPSSTPEKRRTSLIPRPKSPNMQDLKRRFKQALSAKVRTVT  |
| Q8BHI7 | YFKAFLGPRDTRVKGWFLLDNYIPTFVCSVIYLLIVVLGPK  |
| A2AKM2 | RVCQSISLLELLHIYIGIESNQLFPRFLQLTERVIILFGVI  |
| P31041 | ALCVIWTNSRRNLLQSDYMNMTPRRPGLTRKPYQPYAFAR   |
| O08603 | LWYEAKCFVGEILILHLSNINKTMTSGDPGETANATEVKKC  |
| P30405 | FTNHNGTGGKSIYGRFPDENFTLKHVPGVLSMANAGPNT    |
| Q92871 | LLSKQTIQNHLEELLQDLINFCLSYMALLRLPKRGTFIE    |
| Q99LD8 | RPGLPGATPFLHRGGDLPSQEALQKLSDVTLVPSVCSSE    |
| Q8R3S2 | KKFSCCGGISYRDWSQNMYPNCSEDNPSRERCSPVPSCLLP  |
| P05837 | LWQINFPDYFFFALNQSGSNTNTSDKLTIWNDLSPGTLVV   |
| Q99JY3 | KAPKPFQEVMEHFQNRXYCLFNNRASGAKEEQKMLLTLVQ   |
| Q5E9T4 | CGLIPVGQPCNQVTTTGLKWNLTHQMLGFGTLVSTSNYDG   |
| P55258 | EKLALDYGIKFMETSAKANINVENAFFTLARDIKAKMDKKL  |
| Q8N8R7 | LSSNDMLLQLRTGMTLSGNN TICFHHVKIYIDRFEDLQKS  |
| Q12999 | QFVISCSCLA INRSKQTDVINASWVMSNKTRDELERSFDC  |
| P59539 | CSVELRTTAYNIWAVTGHFSNWPATSLSIFYLLKIANFNL   |
| Q9JJU9 | EFPGYRGRQYVFERGEFRHWNEWDANQPQLQSVRRIRDQKW  |
| Q99623 | IRARPRKISSPTGSKDLQMVNISLRVLSRPNAQELPSMYQR  |
| Q8IY49 | ELLCYVVMGFFPALVILSMPNTEGIWELVTGGVFYCLGMVF  |
| Q9EST5 | GGLDRLAEEPLSLTHLNLSGNNLKDISTLEPLKRLDCLKSL  |
| Q6P6J4 | WVPVLERVRDRVCEVTGQTFNFVLVNRXYKDCDHIGEHRDD  |
| P0C0E4 | QAYAERLGVTFEVSPLCNFNIESFTELARIVLLRHRLNW    |
| P11456 | SNGKETVVGRFNETQIFNGSNWIMLIYKGGDEYDNHCGREQ  |
| Q3TAS6 | GPETAAFIERLEMEQAQKAKNPQEKSFFAKYWMIIPVVL    |
| Q71SV0 | DHYHFSSELGGDFEFMDANMCIAIAISVLMILICAMATY    |
| Q14493 | DFETDESVMRRQKQINYGKNTIAYDRYIKEVPRHLRQFGI   |
| Q9DAZ2 | GERDIATYSAWGLASLQSSNEDVRCFSFYTMIRCLLRDSR   |
| Q61335 | PKRWQKVFKSRLVELLVTYGNTFFVVLIVLVLVIDAVRE    |
| Q3SX44 | DGVRKALQDLGLRIVEMGDENATLDGTDVLTGREFFVGLS   |
| A5D7P8 | SEPNPDYRGQQNKGAHNEQKNNSMNSNNVGTGTGFGPMGNG  |
| P10284 | QIKIWFQNRMRKWKDHLKLPNTKIRSGGTAGAAGGPPGRPN  |
| Q6ZP29 | VIGSISSVLYLLSRLPQIRTNFLRKSTQGISYSLAFVMLG   |
| Q9D338 | FLGICIKRSGNGLGATFTLRNTIEGQGVIEICFELYNPRIQE |
| Q9D0I8 | NSKLDIRNAWKHSRMFFGKNKVMVALGRSPSDEYKDNLH    |
| Q91VJ5 | DRSHEKPDRSHEKADRNEKNDREERERNYDKVDREDRDRE   |
| Q8NCL8 | AFVFSSLIPLLLMTPVFLGNTSECFQNFSSQSHKCILMHSP  |
| O15537 | VQYRTDERLNWIYYKDQGTGNNRVFYGNSDRTSTVQNLLRPP |

|        |                                             |
|--------|---------------------------------------------|
| O76038 | QIWRKYDADSSGFISAELRNFLRDLFLHKKAISEAKLEE     |
| Q2T9T3 | EPEKVGIKTIKVYQQRMQEENITRALIVVQQGMTPSAKQSL   |
| Q925U0 | TTWPNDTYEFIIYRTYSCGIANKVLCDDVTLTKTQLTYISKNA |
| Q32KV0 | WTILDGTDQMWLPVVRTWRLNERHYGGLTGLNKAETAACHG   |
| Q8K479 | SESRVPPADTPLPFDRVLLNEQGHYDPTTGKFTCQVPGVY    |
| P54920 | IAHYEQSADYKGEESNSANKCLLKVAGYAALLEQYQKAI     |
| P59024 | SKHEVKVYLQKEFEKHAUVNESHHDALVEDIFDKEDEKDK    |
| P01138 | KCRDPNPVDSGCRGIDSKHNSYCTTHTFVKALTMGKQA      |
| Q3SZ72 | SVGSGLLSVSLGLVALLASRNLFPRRLHWALLALVNL       |
| Q5VW22 | FALSSFLNKASAVYQALQKSNGLPELQCHGTADLVLS       |
| P47741 | GYKLGVDVPCPPGHFSPGNNQACKPWTNCTLSGKQTRHPA    |
| Q9N0T5 | PGCDYSLFKDGIEMWEDEKNRGRWLITLTKQRRSDLD       |
| Q148E0 | PGNNIHFTHHDRNRLDHPINSVLQLVGVQHVDFTSRPSVI    |
| Q32L79 | SSSSQDISPYIHEIIIEFQKKNTKIKTSLNLFWGNHPQRKR   |
| Q9NYK6 | VCKLGTDKETLSFCHICFELNIEGVPKSDDLHTKSLRGHKD   |
| Q2MH31 | ERLNAYEREVVNMNLSLRNRTLQIVPRCGVDPLPGR        |
| Q5E988 | REAAFRNIKTIAECLADELINAAGSSNSYATKKKDELERV    |
| Q8R1L4 | ETITTHYLFFLGLYRLLYLANWIRRYQTENFYDQISVVSGV   |
| Q08DJ0 | GQPLDINMAGEPKPYRKPKNRPIALYRLESKEPFLSVG      |
| P04394 | VLPVLDLAQRQNGWLPISAMNKVAEILQVPPMRVYEVATFY   |
| Q15286 | FSGSYITTIQVDFKIRTVEINGEKVKLQIWDTAGQERFRTI   |
| Q9NP95 | TYSSNIYKHGDTGRRYFVALNKDGTPRDGARSKRHQKFTHF   |
| Q9JJR9 | LGSSKDTQPHNILQRRMETNLSKLRSTRVPWASKTNKFNQ    |
| P57784 | GLPTDKKGGPSAGDVEAIKNAIANASTLAEVERLKGLLQS    |
| Q8CGF5 | RFGFVIQSVWIVTCVILDVMNIMMIKIKTKGCIKVISLIRQ   |
| Q8C5C9 | QSPSLSRFFTSADILDFSVENATVYHLQFGVPSDDDFMK     |
| O43759 | EGYLNASASEGEEFCIYNRNPACSYGVAVGVLAFITCLLYL   |
| Q9QWZ1 | LLTQYNEEEYEQYCLVASLDNVRNLSTVLKAIHFREHATCF   |
| P04393 | NRDDVVYCDPPYIGRHVDYFNSWGERDERLLFETLSSLNAT   |
| P61247 | KVVDPFSSKDWYDVKAPAMFNIRNIGKTLVTRTQGTKIASD   |
| P58321 | KKFLEESVSMSPPEERAKYLENYDAIRVTHETSAHEGQTEAP  |
| P08962 | MSKNRVPDSCCINVTGCGINFNEKAIHKEGCVEKIGWLR     |
| Q91XQ6 | WYLIINAVVLLILLSALADPNQYHFSGSELGGEFEMDDAN    |
| Q86UA6 | RDRLLNRYRQAGSSGPGNSQNSFLVQEVMEEEWALQSVEN    |
| Q96AX2 | AWLTEIHEYAQRDVVIMLLGNKADMSSERVIRSEGETLAR    |
| Q96SZ5 | ASDRDAASGPEAPMQPGFPENLSKLSLLTQLRAEDLNAP     |
| Q9NWZ8 | AMAWMQSHHNAYRKAVESCFNLPWYLPQSSYDNEAA        |
| Q3T0S3 | VVVPNIKKEYGSQKDFTVVNSTMAGLCCGFTNYTDFEGS     |
| Q9BQQ7 | MREVKPWHRWTLRDPKGLLPNVLPKPGWQYQQTWARFQCS    |
| Q8K177 | GHVNLLVGAVLHGTVLRHVANPRGAVTPEYTTANVISVSGS   |
| P20040 | FYNGTQVRVFLKRYFYNLEENLRFDSVGEFRAVTELGRPD    |

|        |                                             |
|--------|---------------------------------------------|
| Q9ES30 | GPPGPPGPPGI PGNHGNNNGATGHEGAKGEKGDGLGP      |
| P00847 | LGLPLVTLIVLFPSSLFPSTNRLVSNRFVTLQQWMLQLVSK   |
| Q7M729 | AINGSSILLPCTFSSCYGFENLYFKWSYNNSETSRILIDGI   |
| A6NDR6 | SEEQKKQLAQDTGLTILQVNNWFINARRRIVQPMIDQSNRT   |
| Q8NC06 | CLVPRPGFWDPIGRYKWDANSLGKMSREEAMSAYITEMKL    |
| O75663 | QHSGFGIEFNATDALRCVNNYQGMLKVACAEWQESRTEG     |
| Q92904 | PGAEVVPNECSVHEATPPSGNGPQKKSVDRSIQTVVVSCLFN  |
| P14436 | GGLQNI AVVKHNLEILT KRSNFTPAANEAPQATVFPKSFVL |
| Q6NVG5 | VSGNNPYSSFGATLERDDEKNLWSMPHDVSHTEADDDRILY   |
| P05531 | TYIKDSFKDSNVKLEQLWKTNKQERKKINNKFCQYITTFQ    |
| Q9CQ07 | ELDLSRNMIRKIPDSIAKFQNLRWLDLHSNYIDKLPESIGQ   |
| P55212 | HDVPVPLDVVDNQTEKLDTNITEVDAASVYTL PAGADFLM   |
| Q9NZC4 | NLQHLKWNQCSSDLFQSTHNVI V KTEQTEPSIMNTWKDEN  |
| P11352 | LMTDPKYI I WSPVCRNDIAWNFEKFLVGPDGVVRRYSRRF  |
| Q1LZH0 | KKESGQLRFGGRDRPFRKPINLPVVKNDQFREGKRERRERS   |
| Q4VBF2 | GIFAEACSNATYVEVWDFMNRSGEEQERVLRYLEDESQ GK   |
| Q6ZP80 | HHEGFFWRCWFNGIVEENDSNIWKFWYTNQPPSKNCTHAYL   |
| Q13268 | LSVNVKSPALLS QLLPYMENRRGAVILVSSIAAYNPVVAL   |
| Q8BVG8 | REDEKPLVLEMLKAGVKDTENRVALHALTRPPALLLAAAS    |
| Q9NX63 | TFEADENENITVVKGIRLSENVIDRMKESSPSGSKSQRYSG   |
| Q96LR2 | MELAYLRAIDVKILQQLVTLNEGIEAVRWLLEERGTLTSHC   |
| Q3KPI0 | QASSTTVTEKGSVVL TCHTNTGT SFQWIFNNQRLQVTKRM  |
| P35625 | KYQYLLTGRVYDGMYTGLCNFVERWDQLTLSQRKGLNYRY    |
| Q58DS9 | AQAAIVVYDITNTDTFARAKNWV KELQRQASPNIVIALAGN  |
| O95456 | KTSESTGSLPS PFLRALKTQNFKDSACCPLLEQPNIVHDL P |
| P63139 | EEAFTNQLPAGLITADGQQQNVMYTTSYQQISGVQQIQFS    |
| P50295 | LKTLTEILQHQIRAI PFENLN IHCGESMELSLEAIFDQIVR |
| Q0IIB1 | FEKGVFDRQGNFLVPPEKSINKIGHALHALDPIFRCVTHSH   |
| Q9D7F7 | LRNMGFAAKAMKAVHDNMDLNKIDDLMQDITEQQDIAQEIS   |
| Q96PP4 | LILSDDPTSKREQWFRFSTDNDFKSEGKYSKVYALRTQKKM   |
| Q8N6I1 | LLGEPVDEEGPEGRPRS RHGNGGLAALPYLRLRHPLSVLGI  |
| O43291 | GPCRASFP RWYFDVERN SCNNFIYGGCRGNKNSYRSEEACM |
| Q5VTT2 | KLSQMCLNTEWVEMKSKALLNEETVSSGI IERVTGLPATGF  |
| P61982 | TELNEPLSNEERNLLSVAYKNVVGARRSSWRVISSIEQKTS   |
| Q6QRN8 | FIIFKAYLINCWNCYKY INNRNMPEIAVYPAFEAPPQYVL   |
| A6NM15 | EHLNMFIQNLLWEKNVRNKDNHCMEVIRLKLGLVSIKDKSQQ  |
| Q8K386 | QQQLAKEYGMDFYETSACTNLNIKESFTRLTELVLQAHRK    |
| Q6P047 | QRQIQNTFAILD LKQLKKTNLNAPTPIPPPITSHAGQEEA   |
| Q8WTT0 | IGLSDPGGRRHQWVDQTFYNENVTFWHSGEPNNLDERCAI    |
| Q9EP73 | SRTEGMLLNVTS SLRVNATANDVFYCTFWRSQPGQNHTAEL  |
| Q3T166 | QSFVGEIWDVSLWDHVVSLKNLCFTCYTSNINLWKALIYQA   |

|        |                                            |
|--------|--------------------------------------------|
| Q08DY6 | PSLLVDPABETVRRRCRDPINVEGLLPSKIRINLEDNVQYV  |
| Q8WUU8 | GATVVQYIPPPYGSPEPMGINTSYLQSVVSPCGLITSGGAA  |
| P53026 | VLCLAVAVGHVKMTDDELVYNIHLAVNFLVSLKKNWQNR    |
| P00639 | YLNQDDPNTYHYVVSEPLGRNSYKERYLFLFRPNKVSVDLT  |
| Q99KR3 | ILGEGTTIFEDLYDYMNSLNNLLKIKANIIYPGHGVPVIHNA |
| Q7Z692 | MLLRRAQPTDSGTYQVAITINSEWTMKAKTEVQVAEKNKEL  |
| A6NJI9 | LKGMLNLKILSLYQNPQCYNLYRLYIIYHLPGVELLDNRQ   |
| Q9P2Z0 | VSCTRPRAGKQAAASQITCENELVQTQPHADNPSNTVTSVP  |
| Q9BXN2 | DGSKRQCWQLGSNLTKIDSSNELGFIVKQVSSQPDNSFWIG  |
| A8MUP6 | AGLLGMVAHMMYTTTFQITVNLGPEDWKPQTDWDYGSYCLA  |
| Q3T110 | SLLIPLALWSIIVNILLYFPNGQASYASSNKLTNYVWYFEG  |
| Q15006 | YLEQFVGDQEAWEHAEALYINEHDYAKAAFCLEELMMTNPH  |
| Q2TBH7 | KDLDTDREVTFLASRFAQENELMFLETSALTGENVEEAFV   |
| P19404 | SAALRARAAGLTAHWGRHVRNLHKTVMQNGAGGALFVHRDT  |
| Q8VC04 | TFEDAHVQLNTTNVNLNIFNSNFYPIITVQTAEVLHQASVV  |
| Q9R1A9 | SEPPRAETFVFLDLEATGLPNMDPEIAEISLFAVHRSSLEN  |
| O70435 | DGVVFGVEKLVLSKLYEEGSNKRLFVNDHRVGMVAVAGLLAD |
| P15177 | IQANVLKADKMDLRESQGWLNRYEGAAVGAALGAGITGYN   |
| P20339 | EESFARAKNWVKEQQRQASPNIVIALSGNKADLANKRAVDF  |
| Q00977 | MHVAYRRHEKRRKFMKGEIKNEFKDIEEIKTKQVRIEGSLW  |
| P09629 | RIEIAHTLCLTERQIKIWFQNRMRKWKKENKTAGPGTTGQD  |
| P31273 | FQHASHHVQDFHHGTSGISNSGYQQNPCSLSCHGDASKFY   |
| Q9UPY8 | KGKFQDNFEFIQWFKKFFDANYDGKDYNPLLARQGDVAPP   |
| P51908 | YEINWGRHSVWRHTSQNTSNHVEVNFLEKFTTERYFRPNT   |
| Q9NQR4 | SFIREAATQGAKIVSLPECFNSPYGAKYFPEYAEKIPGEST  |
| Q8BHL8 | LNLDDYIDAEDLSDFHRTYKNSEELRSQIRSGIITPIHEQW  |
| Q96KN8 | IIRQTKKVMNKIVQYSLIEGNCEHFVNLGRYGVPRSQQVEH  |
| Q3U0B3 | ILSMFSAVRSQHSGVDICINNAGMARPDTLGSGTSGWKDM   |
| P39687 | EEEEEEEDVSGEEEEDEEGYNDGEVDDEEDEEELGEEERGQ  |
| Q32KM6 | FKCPQKSEPLWKEWDQKAQKNGLRHQVFAVNGDHYVGEWKD  |
| Q8VHX2 | KYPIQDTGLPKAKECDTVNSNCPNSDDQPQGEENDFPDST   |
| Q2T9Y6 | RKKCPSTHSEELRDCIQKTLNEWSSQISFDLIREFPDVEC   |
| Q56A07 | SKYDVSVTLKNVQLEDEGIYNCYITNPPDRHRHGKIIYLQV  |
| Q9EQ06 | VYTADLFATQDPQIEKTFEVNVLAHFWTTKAFLPVMMKNNH  |
| Q8VHW3 | MQEEDRRRTAVGRRRAQEQQNLGLTPEREGKIKLGLLVAIV  |
| Q03255 | QQTTLAFRKDSSLCTDSHSANDQCERGEHVRESSQDHVKRP  |
| Q9NYP7 | TLLSLYMFCELVTGVWEGKYNFFCQGTRTAGESDMKIIIRVL |
| Q8R1J3 | PFAKCFVCGEMGHLRSRCPDNTKGVYADGGSCCKLGSVEHF  |
| Q9H3V2 | FLIAVKKRTTETLIILSRIMNFLSALGATAGIILLTFGFIL  |
| P16563 | ENLYMSTDPTLWSTVIQSWYNENEDFVYGVGAKPNSAVGHY  |
| Q8WV92 | EGIDLLQVLKGTKDNTKRCNLREKISKYMDRAENIKKYLD   |

|        |                                            |
|--------|--------------------------------------------|
| Q922U0 | AWKANAIGRGAKSVREFLEKNYTDDAIETDDLTIKLVIKAL  |
| P78417 | AERTRLVLKAKGIRHEVININLNKPEWFFKKNPFGLVPVL   |
| P10861 | VDVVKTRFVNSSPGQNTSVPCAMMMLTREGPSAFFKGFVP   |
| Q16854 | LLTKTYPEWHVATEPVATWQNIQAAGTQKACTAQSLGNLLD  |
| P05531 | APELDVIEEHNPNVTRDDENANPEEVVGDTRSPVQNILGKFE |
| P43320 | LSSLRPIKVDSQEHKIILYENFNFTGKKMEIIDDDVPSFHA  |
| Q9DC16 | INKVPGNFHVSTHSATAQPQNPDMTHTIHKLSFGDTLQVQN  |
| Q0VCM2 | AEAPVTSLPAFLAMPFNSLVNMAYVFLGVYWLRSQARAPGG  |
| Q5JBG6 | ASFKRLIQICNMMTMADLKKNLIAKVHDESYLNYYYYYKNP  |
| Q9H7T3 | SRRLPKAEGDKSGSAGAPSKNSSRLGGRPCMCTAGRPRNRA  |
| Q9GZP9 | QAFTIMLVYVWSRRNPYVRMNFGLLNQAPFLPWVLMGFS    |
| Q4JM65 | QQNSPVCDEATLGTAGENYNVIQQTVKYFNSQQQITDLFP   |
| Q9CQE6 | VLITCTYRQEFIRVGYVNNNEYTETELRENPPVKPDFSKL   |
| P19404 | RKPVGKYHIQVCTTTPCMLRNSDSILEAIQKKLGKIVGETT  |
| Q99MS4 | AGLGSDVALLQLAVSVQSFPNVKPVKLPSESLEVTKKDVCW  |
| Q9H3S4 | PLLSTGNLKYCLVILNQPLDNYFRHLWNKALLRACADGGAN  |
| Q5EA90 | HSLLLHIGPLASEQMFYAVTNRINDENTYKICTWLEIKVHH  |
| Q9D7L8 | IVDLKNGKINISSVCVSPINESDNGVRFTCKLQRDQTVSV   |
| Q96HA8 | DGPVIWDYHVLLHVSSGGQNFYIDLDTVLPFPCLFDTYVE   |
| A6H7I7 | ARRQEPALRGGPGPLTPHTCNELGPPPSRTPRPARRGSGR   |
| P48755 | EEERRRVRERENKLAALKRNRKELTDFLQAETDKLEDEK    |
| P20851 | LGTIVCIKGYHLVGKKTLCFNASKEDWNTTTECRLGHCDFP  |
| Q28153 | TLSNVQLGVLQSGTILANNTPCYITGWGRKTNGQLAQT     |
| Q9JKK1 | LRSIEWDLEDLDETISIVEANPRKFNLDATELSIRKAFITS  |
| O18879 | QQVPMVEIDGMKLVQTRAILNYIATKYNLYGKDMKERALID  |
| Q9BZG1 | RFKCIASYRGAQAIIVFNLDVASLEHTKQWLADALKE      |
| Q0V7M7 | LKELFESLEEDYKDVEHLKENIPPHLPQVTVTQNFVNGSDL  |
| Q9CRA5 | LMEEVLLGLKLDREGYTSFWNDCISSGLRGCMLELALRGR   |
| Q9Y6H3 | PERLAQGNPQQGFFSSFFTSNQKCLRLLKTLNPNYVKLL    |
| P42574 | NLEPKIIHGSESMDSGISLDNSYKMDYPEMGLCIIINNKNF  |
| Q60753 | GAAARGPGPEPVTVALFTANSTAGIFSAKVLGFHVCGLYG   |
| P49788 | TTQVSHYYLAQLTSVRQWKTNDTIDFDYTVLLHELSTQEI   |
| P56966 | DLKPLLDTLGLFFQIRDDYANLHSKEYSENKSFCEDLTEGK  |
| P39905 | FRYCSGSCDAAETTYDKILKNLSRNRRLVSDKVGQACCRPI  |
| A6QPH1 | PITASRPEGGEFALSKTAKRNLKRKEKRRQQQEKGEAEALS  |
| A0JN69 | LFTIYLFWTLVSVFRYHCRLYNEWRRTNQRVILLIPKSVNIP |
| P70377 | GWYLGLENKEGEMKGNHVKNKPAAHFLPKPLKVAMYKEPS   |
| P98086 | LFIKSSSGGQPRDSLSFSNTNKNGLFQVLVAGGTVLQLRRGD |
| O75636 | SLSLHSGRPFTTYDADHDSSNSNCAVIVHGAWWYASCYRSN  |
| P97299 | LGSARGLFLFGQPDFSYKRSNCKPIPANLQLCHGIEYQNMNR |
| A6ND01 | RMSYTCKSNWRGGWDSQGNKRCPKGAQCLPFSHYFPTPAD   |

|        |                                            |
|--------|--------------------------------------------|
| A1E959 | GFLGATLSAPLIPQRLMSASNSNELLNLLNNGQLLPLQLQG  |
| Q6IC10 | SSMYYGKCRLLGWGYMTAILNAVLASLLPIISWPHTTKVQG  |
| Q96IL0 | EFLSKNFQKHMYYNRDWKRNFAITFFMGKVALERIWNKLLK  |
| Q8N1B3 | FQVSFQHPKYLHLYLVSLQNLNRHSWQRTFVAVTAWALL    |
| Q96CE8 | ICFSGIMMLIVTTVLLVLENNNNYKCCQSENCSSKKYVTLLS |
| Q8WWG9 | QTVSLAPAVEAASMLKMEPLNSTHPGTAASSSPLESRAAGG  |
| P31946 | TEQGHELSENERNLLSVAYKNVVGARRSSWRVISSIEQKTE  |
| P61106 | AFLEAAKKIYQNIQDGSLLDNLAAESGVQHKPSAPQGGRLTS |
| Q47456 | KTGRYLQOGLVEEGYQADLFNNGRDGLGAASKGQYDLIILD  |
| Q56A07 | TRLPCTFNSCYTVNHKQFSLNWTYQECNCTEEMFLQFRMK   |
| Q8BGI3 | LGLGITIAFLATLITQFLVYNGVYQYTSPDFLYIRSWLPCI  |
| Q6NXY9 | EDGEEDAEQEDYDEEEQEEENDYINSYFNGDDFGVSDDDN   |
| P08218 | GVSTYAPDMSRMLGGEEARPNSWPWQVSLQYSSNGQWYHTC  |
| O75934 | VREAAAALVEEETRIRYRPTKNYLSYLTAPDYSAFETDIMRN |
| Q9CR68 | KPEWVILIGVCTHLGCVPIANAGDFGGYCPCHGSHYDASG   |
| Q6PKH6 | VSKTALLGLNNTLAIELAPRNIRVNCLHLDLSRLASAGCSG  |
| Q2TBL9 | GVDVNGKYTAGKEVLEYLGNPANYPVSIIRFGRPRLTSNEK  |
| Q8WUN7 | AAHAFESNDHELAQAIIDGANITLPHGALTECYDELGNRYQ  |
| P57087 | TRSDAGKYRCEVSAPSEQQNLEEDVTLEVLVAPAVPSCE    |
| P31275 | DPPSCQSLESDSSSSLLNEGNKAGAGDFGSLVSPLNPGGG   |
| O43610 | GTCLCCVKGLFYHCSTDDEDNCADEPCSCGPSSCFVWAAM   |
| Q9Y3E7 | KEMIRSRKAVSKLYASKAHMNSVLMGMKNQLAVLRVAGSLQ  |
| Q8NH89 | TAVTIFYGTLASYMLQPQSNNSEQENMKVASIFYGTVIPMLN |
| Q3SYP2 | RLWTNGPIAEVLQQGLQPIVNHTTCSRDLWWFIKVRTMVC   |
| P32850 | LEITGRTTTEELEDMLESGNPAIFASGIIMDSSISKQALS   |
| Q6IR41 | KTGLHSSENFSLFLFDRVFNVDGHFDMATGSFVAPLRGLY   |
| Q9BVG4 | VSGELVSAHALSLPAESYGNPDIEMAWAMRAMQHAEVYY    |
| Q8K3A2 | AVFIDGPLALTDGIPFFCSANGVILTPGNAEGFLLPKYFKE  |
| Q9H8T0 | DPTSGELDVKRAFAKWRNRNHNHIWQVLMYARRVYKIDTAS  |
| Q96D96 | QFEALGLLILLRLWRVARIINGIIISVKTRSERQLLRLLKQM |
| Q9BQ51 | VTSVLRLLKPPGRNFSVFNTHVRELTLASIDLQSQMEPR    |
| Q9NWC5 | LFLTICFCWHYAVTIVIVGMNYAFITWLKVSRLKRLCSSEV  |
| A1A4Q8 | PQLKESLQTLMKVAAQNLIQNTNIDNGQKSSDGPQRFDKC   |
| Q8N6M8 | ESKAEAKTPVLVETQTVDNANEKSEKPPENQKLSDKDTVA   |
| Q3T160 | TVSLGAGAKDELHVVEAEAMNYEGSPIKVTLATLKMSVQPT  |
| Q2KIG1 | VVLITCTYRGQEFIRVGYVNNNEYTETELRENPPVKPDFSK  |
| Q2KIN3 | HHYSAAFQIDGHWMHYDGLRNVNLIILLNKPPEFLLSSLVY  |
| Q8WXI8 | FQSNCFPLTDNKTWAESERNCSGMAHLMTISTEAEQNFI    |
| Q9DCT5 | VSAFGEEGEGDYLLDDWTVLCNGPYWVRDGEVRFKHSSTDVL |
| Q96PB8 | NLKEIPRDLPPETVLLYLDNSQITSIPNEIFKDLHQLRVLN  |
| Q8BX10 | VWDTNWDRREPLSLINLKKRNVESGEDELTSRLDHYKAKAT  |

|        |                                             |
|--------|---------------------------------------------|
| O35723 | SCGGGAAGNYKSVSTSTEIINGKKITTKRIVENGQERVEVE   |
| P0CW71 | SAIDDLQFKFLQVDDKDDHFNLPVIAETFRGLSPKMKPLKG   |
| P0DMB1 | PAEEGKAAPLYQQPLMIPQANHMAGISPSFLVTPLCIPRCR   |
| Q14493 | TVPADFETDESVLMMRQKQINYGKNTIAYDRYIKEVPRHLR   |
| Q61199 | IHNTEVDWEDRTVPETLVGNLFHSRITSPLRRLFVKQPPDP   |
| A6NCD4 | TAEEIIDKHLQKDLDAEENQNVAKTLRGKVVREKLIKISKINK |
| Q9D1D1 | AAEITASVDRLQQDFKCCGSNSSADWQHSAYILSQEALGRQ   |
| Q61885 | PIRALVGDEAEELPCRISPGKNATGMEVWYRSPFSRVVHLY   |
| Q9XSK2 | EKILAVTNKVPDSCCVNITHNCGINFVKDIHTEGCEKIA     |
| Q8BG84 | LSALLFCFLRHRQKKQGLPNNKRQQRPEERLNLATNGLEM    |
| Q32KY8 | QTRQSNILKILLYGILERENNPINIVLTILLYPSRVRIMV    |
| P97461 | RRVNQAIWLLCTGAREAAFRNIKNAECLADELINAAGSS     |
| Q02738 | EERERKHLRKHGPNAPALYSNLSKRRGLWWTYLLSLIFKA    |
| Q9NQ48 | ITSSNKKPILDVTKPKLAPLNEGGAELLNKEILRLQEENE    |
| Q60631 | KVLRDAGAGYFLWVVKFNSLNLVDYHRSTS SVSRNQI FLR  |
| Q9H4A5 | ATEPTETVQTWIELLTGETWNFFKLQYQLRNVREERIAKNLV  |
| A6NGC4 | TAVLSGHYVGFMSVSLLELNSACLHLRKL LLSRQAPSLA    |
| P08311 | CGGFLVREDFVLTAAHCWGSNINVTLGAHNIQRRENTQQHI   |
| Q8N4E7 | PAAGPSRVQRNFHPDSEAAINRQINLELYASYVYLSMAYF    |
| Q14919 | HMDGDKGARRGRKPGSGGRKNGMGTKSKDKKLSGT DSEQE   |
| Q58DM4 | AGLAEEEGNSKKNPRRAAPGNQVDSAGLTWGRIRAEGLNCD   |
| Q28132 | CYYLQLLLNFNPLVHTQGICSNRVTDVVDVTKLVANLPKDY   |
| P18181 | NELKITLEVDFVVPKPSIEINKTEASTDSCHLRLSCEVKDQ   |
| Q9CRB9 | TFEADENENITVVKGIRLSENVIDRMKESSPSGSKSQRYSS   |
| Q3SX30 | LNLDYIDSEHLVD FHRVYKNSEELRSRIVSGIITPIHEQW   |
| Q5VXU3 | PSVLTGKVAPEEFKTSIGRVNACLKALPVNVKWL LCGCLC   |
| P97765 | FMPFYLKMDCEIKQPVFGANFIKIVKAEAGGWEGSASY      |
| A6QLP7 | TSSQNDVMSWIPQETLNQINKASPRRLPRKRAQKRSVGS D   |
| P35288 | FTKDYKKTIGVDFLERQIQVNDEDVRLMLWDTAGQEEFDAI   |
| P13761 | LLVCSVSGFYPGSIEVRWFRNGQEEKAGVVSTGLIQNGDWT   |
| P49721 | YKMRNGYELSPATAANFTRRN LADCLRSRTPYHVNLLAGY   |
| Q8WTZ3 | IKIIHTEEKPKCEECNKVFNWSSHTTKYKRIHTEDKFYKY    |
| Q5E943 | RQIMRFAMKSRRGPHVPVGH NAPKDLKEEIDIRLSKVQDIK  |
| Q9Z1Y9 | SDGWAVPGDSSLSFEVKKHRNQEDRCAAHQLLERFSLFPQ    |
| Q9H082 | SMVQHYRNVHAVVFVYDMTNMASFHSLSWIEECKQHLLA     |
| Q8NCR9 | KGTTHSYGYSFWLILLVILLNIVTVTIIIFYQKARYQRKQE   |
| Q9NP55 | SGGLLGGLLGKVTSVI PGLNNIIDIKVTDPPQLELGLVQSP  |
| Q3T0N1 | GTPASFGKTFQAQKSGYFLCLNPLGSLNPLEN VVDIQILV   |
| Q920L5 | ITLSQITQMLMGCVINYLVFNWQHDNDQCYSHFQNI FWSS   |
| Q60654 | TTKYNIRDGLCMSLSKTRLDNGDCDSKYICICGKRLDKFPH   |
| Q9Y272 | AMRRLSILTGDVFI L VFSLDNRDSFEVQR LRQQILDTKSC |



|        |                                             |
|--------|---------------------------------------------|
| Q5E948 | DNLEKEMLPHYEPIPPFSASLNESTPTGITDHTIAQGPDPNTE |
| O60258 | KSKDCVFTEIVLENNYTAFAQNARHEGWMAFTRQGRPRQAS   |
| P04390 | LGSDTKVLSTIFELFSRPIINKIAEKHGYIVEEPKQNHYP    |
| Q9BTE7 | TWPLFSVFYQYLEQSKYRVMNKDQWYNVLEFSRTVHADLSN   |
| P48230 | GCARCLGGTLIPLAFFGFLANILLFFPGGKVIDDNDHLSQE   |
| Q0V881 | KAGDAGRYWCALLGQRYRYQNWRVYDVSVLGRSQFSARAAD   |
| Q5VWW1 | YHVLMRGGDGTSMWADLCKNNQVRASAIQAQDADQNYDYASN  |
| P49406 | ELKVKMKPKPWSKRWERPNFNKIGIRFDLCLTEQQMKEAQK   |
| P46926 | ESYHSFMWNNFFKHIDIHPENTHILDGNAVDLQAECDAFEE   |
| P04483 | DRHHTHFCPLEGESWQDFLRNNAKSFRCALLSHRDGAKVHL   |
| Q9NYP7 | ITVLHVYHHASMLNIWWFVMNWVPCGHSYFGATLNSFIHVL   |
| A2VDR2 | VASREQLLYLYARYKQVKVGCNTPKPSFFDFEGKQKWEAW    |
| Q8R035 | PLDRLSISYCRSSGPGGQNVNKNVSKAEVRFHLASADWIEE   |
| Q7L0L9 | ARFIVVPAAYALALGLGLPANVAALAMFIRSGGRLGQALLL   |
| P09926 | IVPSTKNRHQLFCKLTLRHINKSPEHVLRHQTGRRYQRALH   |
| P0DMR3 | SKENLLALNTHSRRQKQKRENKVCVSTWQKSRGDRTYSSMA   |
| P09012 | ILFLTNLPEETNELMLSMLFNQFPGFKEVRLVPRHDIQFV    |
| Q61999 | GSCVKIESPCYPCPCPCPCPCPCPCPCPCACACGCGCGCG    |
| P17433 | HYWDFSAHHVHNNEFENFENHFTELQSVQPPQLQQLYRHM    |
| P13661 | TWMQFSVVWVSQEITQKIGLNKIKNYLKDIFYGNQDFSGDK   |
| Q17QN8 | HDQPIPWVQFNLGSSRFSNQCRRNSIQGKHLITDELGYVC    |
| Q5E995 | VAADALGEEWKGYYVVRISGGNDKQGFPMQGVLTHTGRVRL   |
| P50540 | AKAHIKKLEEAERKSQHQLENLEREQRFKRRLEQLQGPQE    |
| Q9DCS2 | WEWEQWGGIPPRSLLCINMIHISPLNCTEGLFRAAGHL      |
| Q32PI9 | KDRVSWAGDLKDKDASINIENMQFIHNGTYICDVKNPPDIV   |
| Q92527 | DCATILLNFGADPDLRDIRYNTVLHYAVCGQSLSLVEKLE    |
| P28063 | LPRGMQPTAFLRSFGGDQERNVQIEMAHTTTLAFKFQHG     |
| P08218 | VSLTDKIQLACLPPAGTILPNNYPCYVTGWGRLQTNGALPD   |
| O35671 | AIEKLAVSEGKSLEGPLDLINYIDVAQQDGKLPFVPLEEEF   |
| Q99L83 | RSIVEHVAAKLNIPPTNVFANRLKFYFNGEYAGFDEMQPTA   |
| Q8K2M3 | PTVFYMPHCGTALYNLLWSNWSADALSRVLIIGNSFRLGLE   |
| O54709 | VSSREGYCGPCPNWICHNRNQCQFFNEEKTWNQSQASCLS    |
| Q3ZBY3 | TEFMEAWRKYDTRSGYIEANELKGFSLDLLKKNRPPYDEP    |
| P48758 | LSRILARKLNEQRRGDKILLNACCPGWVRTDMAGPKATKSP   |
| A5PKI3 | NVLMGKNNVGRGINVALVNGKTGELIDTRFFDMWGGNVA     |
| Q92874 | VYLDVIDKWGTDMLFLGDFNADCSYVRAQDWAAIRLRSSSE   |
| Q7L2Z9 | VIMTILSNSIKEKEEIQYHLNFKKRLQLQCETLKVPPKMM    |
| O00560 | GFIFKNGKITSIVKDSSAARNGLLTEHNICEINGQNVIGLK   |
| Q9D5K1 | NLKFKVRLYFGLRVLPPKLVNLFQQSLTEDQKLIKDGWEV    |
| O43513 | QQVSALPPPPMYIKEYTDENIQEGLAPKPPPIKDSYMMF     |
| Q6MZM9 | RNLPPPLYRPNVTVPSYPGNVYTDGLPSYPWILTSPGFP     |

|        |                                             |
|--------|---------------------------------------------|
| Q9WTQ8 | MNGLRLGLKETQSMAWSKPRNVQILNMVTRQ GALWANTLGS  |
| Q9JKX8 | LVRVGNNGTCFWDPNFQGLCNPPLTAATEYRFKYVLVNMST   |
| P70331 | PEEAAPSMPHDSGLRAQQALNSIDLDPTEAVTCQPQGNPQ    |
| P11900 | VFEGLVNPRFTDQNIAYKWNGLSKAEMAGYVEKLMPGQSA    |
| Q32KP7 | ADQEDSLPKLCTAWGLRSHLNGMKERLSKLPAGHPARLLK    |
| Q9D6Y1 | EMLCDQAWGSMLEVPAGSRLNLTGLGYFSCHSHTVVQDYSY   |
| P07477 | DRKTLNNDIMLIKLSRAVINARVSTISLPTAPPATGTKCL    |
| P47754 | ESWRTSVETALRAYVKEHYPNGVCTVYKVKVDGQQTIIACI   |
| Q9CPX5 | AVVKYSRLEDVLHGCSWKINNKLDGTYLPLPVDKIMQRTKN   |
| P13765 | SDVGMFVALTKLGQPDAEQWNSRLDLLERSRQAVDGVCRHN   |
| Q96BD8 | CDEFNGVPSYMKSRLTYNQINDVIKEINKAVISKYKILHQP   |
| Q8R191 | QTLLRVVSWVFSIAVFGPIVNEGYVNSDSGPELRCVFNAGNA  |
| A6NJ46 | GLSSQGVYYSPOVGNFSKAGNEYPTRTRNCWADTGQDWRGG   |
| P41317 | SFEDLTGNRVRYTNWNDGEPNNTGDGEDCVVILGNGKWDV    |
| Q29438 | RTTNRILASSCCSSNILGSVNVCGFEPDQVKVRVKDGKVCV   |
| P31275 | PPHDPSPSCQSLESDDSSSLLNEGNKGAGDPSLVSP LNP    |
| Q505H4 | CEPSNEVHCVVADCAVPECVNP IYEPEQCCPVCKNGPNCFA  |
| O54831 | ELFEYTQSILNSIYGTTTTGNVEYTVFSGLEDLKS SDEEFS  |
| Q60930 | AIEDQICQGLKLTFDTTFS PNTGKKS GKIKSAYKRECINLG |
| Q9H1E3 | DEDFLMEDDDSDYGS SKKNKMMVKKS KPERKEKKMPKPR   |
| Q2TBH5 | TSWVNSFKPSQVYLKEEEEKNEKRQKLRKKQQAQGEKVS     |
| Q8WXK3 | ANVNAAKLHETALHHA AKVKNVDLIEMLIEFGGNIYARDNR  |
| Q2KJD3 | PSHTKIKYRQTQDAPEEVRNRDFRRELEERERAAAAREKNR   |
| O75954 | AIGTIVMTGFLGCLGAIKENKCLLSFFIVLLVILLAE LI    |
| P07478 | VVSNGLQGIVSWGYGCAQKNRPGVYTKVYVYVDWIKDTIA    |
| Q3SZ18 | PDFVGF EIPDKFVVGYALDYNEYFRDLNHVCV ISETGRAKY |
| Q1LZC5 | RRLGPTGKEVHALKRLRDSANANDVETVQQLLEEGTDPCAA   |
| Q9D0I8 | IEELRKCVDTYKYLFI FSVANMRNSKLDIRNAWKHSRMFF   |
| Q06186 | LLPTGGDRAQGVQDLEGTDLNLFKVAFSKPKGLATPSKER    |
| P47878 | ESKRETEYGPCCREMEDTLNHLKFLNVLS PRGVHIPNCDK   |
| Q92535 | ERQPFDPNYVDRRFL EELRKNIHARKYQYWAVVFESSVVIQ  |
| O95237 | LLISNFTLFSSGAAGEDKGRNSFYETSS FHRGDVLEVPRTH  |
| Q9NPC3 | VLGFPLGNNSKFPLDNT PVRNRGDGDGDFQFRPFFAGSPTA  |
| P01583 | KKRRLSLSQSI TDDLEAIANDSEEEI IKPRSAPFSFLSNV  |
| Q9H741 | DELGYVCERKDLLVNGCCNVNVPSTKQYCCDGCWPNGCCSA   |
| Q86VG3 | KDVLDKFLNCHEQTYDEEFLNTFFTHLSQEDHVS KRGVFGTD |
| Q8QZV2 | GARAPPTRSQTNCCLPEGTMNNVYVNMPTNF SVLNCQQATQ  |
| Q8BGC9 | EKIQGLPFGSCLAISDGPVHNSTGIPFFYMTAKDPAVADLV   |
| O95407 | PCPPRHYTQFWNYLERCRCYCNVLCGEREBEERACHATHNRA  |
| P06342 | RWFRNGQEETVGSSTQLIRNGDWFQVLVMLEMTPHQGEV     |
| Q9BY71 | AVAVFCSLRGLQEVPE DIPANTVLLKLDANKISHLPDGAFAQ |

|        |                                            |
|--------|--------------------------------------------|
| Q96FW1 | MDLIEQVEKQTSVADLLASFNDQSTSDYLVVYLRLLTSGYL  |
| Q8BNL5 | FDLLRKEADFYQIEPLIQCLNDPRPLYPMDTFEEVVELSST  |
| Q8BGF6 | NLTEMAYSLKSEALKHLHLYNFVPGVPTMEHFHQFYCYLVY  |
| Q9ERQ8 | LTDALYMRFKDTKAQFSCFNPKLLPSTRHYWYTPGSLTT    |
| A5PKE4 | NAQKLLSEALELEMDHLLVENIERETFHLCSRLINGPYRRT  |
| Q9Y657 | TEDGSKDEWRGMVLARAPVMNTWFYITYEKDPVLYMYQLLD  |
| Q9H7X0 | HISTTAQDHCKAIYLHVLTNNNTAINFYENRDFKQHLYLPY  |
| Q9H400 | RALPAAAATAGCAGLEATYSNVGLAALPGVSLAASPVAEY   |
| Q9NVK5 | EIDEQQGCKEQERIFQLEQENKGLREILQITRESFLNLRKD  |
| P22676 | AEFMEAWRKYDTRSGYIEANELKGFSLDLLKKNRPYDEP    |
| P26892 | LDYLQNEYEGNQENVRDLRKNIRTLIQILKQKIADLITPA   |
| P53026 | AFLASESLIKQIPRILGPGLNKAGFPSSLTHNENMVAKVD   |
| P97348 | MVFAKGAFFESYSPTVFERYNATLQMKGKPVHLQIWDTAGQ  |
| P61982 | ARRSSWRVISSIEQKTSADGNEKKIEMVRAYREKIEKELEA  |
| Q75VT8 | AKNLQQRERESCWAQINFNTDMSFDNSLFAISTKMTQED    |
| Q2HJF3 | LNSNIGIRDLAVQFSCTEAVNLASKILQSYESSLPQTQQVD  |
| Q91ZT8 | TIDWRTPLFNACVSGSQDCVNLLQHGGATPHPETELASPIH  |
| Q2HJ54 | KEDFLIKIETWHKPDGLTENVHKLEPEAWKHVEVIYIDIA   |
| Q3SZC2 | YQLELHGMELEEPPLVLAANVVRNITYKYREDLSAHLMVA   |
| Q28110 | VTLCQGTFSFAGNLTTWFHNGSSIHTQKQPSYSFRAGSND   |
| Q9D4V7 | HDLTNKSSQNLYRWSLEVLNRDAVPTGVLVNTNGDYDREQF  |
| Q91XD3 | GCARCLGGTLIPLAVFGLLANILLFFPGGKVVDKSHLSDE   |
| P54821 | DQLNSEKKKRRQRNRRTFNSSQLQALERVFERTHYPDAF    |
| Q8N4E4 | EDVWVIHLYRSSIPMCLLVNQHLSLLARKFPETKFVKAIV   |
| P14435 | VFPKSPVLLGQPNLTLCFVDNIFPPVINITWLRNSKSVTDG  |
| P08294 | SIVGRAVVHAGEDDLGRGGNQASVENGNAGRRLACCVGV    |
| Q9NPE2 | GSGALPSGQKLEELKAEFPDNFSSKVVQRGREFFDSSNGNFL |
| Q9Y255 | QSVLRSSWDQVFAAFWQRYPNFYSKHVLTEDIVHREVTDPQ  |
| Q5H9L2 | EKGREDEGEPGDEGQLEDEGNQEKQKSEGEDKPKQSEGKPA  |
| P05231 | QIRYILDGISA LRKETCNKSNMCESSKEALAENNLNLPKMA |
| P00435 | RGLVVLGFPNCQFGHQENAKNEEILNCLKYVRPGGGFEPNF  |
| Q9H560 | ALMLAVQHNSSSIVSLLLQNNINIFSQDLFGQTAEDYAVCY  |
| C9J442 | AVVGFPHGPEWEPVQGLLSQNHSCRDPCCGNLLVLCLFLV   |
| Q3MHY7 | LLRREIAAVFRDNRMIAVCQNVAMSAEDKLLMRHQLRKHKI  |
| P00403 | IILVLIALPSLRILYMTDEVNDPSLTIKSIGHQWYWTYEYT  |
| A6NNA5 | SVATLRMKAREHSEAVLQSANLPPSTSSSPGPVAKPAPPDG  |
| P14439 | EPLRKHWEFEEKTLLEPETKENVVCALGLFVGLVGVVGIIL  |
| P41272 | FLIFVLGAILFFHQRRNHGPNEDRQAVPEEPCPYSCPREEE  |
| Q9D6N1 | DSSLRPLSIKYDPASAKIISNSGHSFNVDFFDDEDKSVLRG  |
| P48230 | FFGFLANILLFFPGGKVIDDNDHLSQEIWFVGGILGSGVLM  |
| Q3UA16 | QELKEEYARKRETISTANKANEERLKGKQKSADLYRDYLG   |

|        |                                            |
|--------|--------------------------------------------|
| Q28030 | IGDPTHYGYSTGQPCVFIKMNRVISFYAGANQSMNVTCVVK  |
| Q5T0J7 | LHHCCTCCEKCLLALKNNYNRGNIPSEASGLYKGGEEPVT   |
| O70435 | STFSPDGRVFQVEYAMKAVENTSSTAIGIRCKDGVVFGVEKL |
| Q8K3A2 | LQLPQFHSFSIEDVQLVVNTNEKQRFLLQPGEPSTGLLIRA  |
| Q9EQ06 | GRLTAYEFAKLNTKLVLDINKNGIEETAACKRKLGAQAHP   |
| Q8WXI8 | WVDQTPFNPRRVFWHKNEPDNSQGENCVLVYNQDKWAWND   |
| P14190 | RTKLFGLSRNDILGQIQRVNANITSLVDVAGSYRENMEYT   |
| Q9NPJ6 | YPTDLEMRSGLLGQMNPNSTNGVNGHLPGDALAGRLPDVL   |
| Q2KJ84 | RLSKSGHIQTLLRAFEARDRIQESNFDRVNFWSMVNLVVM   |
| Q5E9K3 | KDGFRTFTNFESRKGKELDSNPFASLVFYWEPLHRQVRVEG  |
| P50296 | IEDFWSISTYYQVSRTSVMTNTSLCSLHTKDGVMGLMGTIL  |
| Q14002 | TRQFYVFSEPPKPSITSNFNPNVENKDIVVLTQCPETQNTT  |
| Q9D3G5 | ARAFQQAMYEYNQAEMKQRDNCKIRIQRQLEIMGKDMSEGEQ |
| P27512 | PWTSCEKDNLEVLQKGTSTQTNVICGLKSRMRALLVIPVVMG |
| Q91WB7 | FEGRKEIWDALKAAAYAAEANDHELAQAALDASITLPHGT   |
| A7MAZ5 | GVSLAALKKALAAAGYDVEKNNSRIKLGKSLVSKGTLVQT   |
| P98066 | GIIDYGIRLNRSERWDAYCYNPHAKECGGVFTDPKQIFKSP  |
| Q8NBR9 | TMYPWGLPPSHLGSSSPFSANMEQWDYKYSQTRFAPFLPES  |
| Q9NQ35 | METNLSKLRSGPRVPWASKTNKLNQAKSEGLKKSEEDMIL   |
| Q96HZ4 | VHTFVSTCQAIDATVAAELLNHLESMPREGSSFQDLGD     |
| Q3ZCA1 | LVVQNACGHLGLKSEEICWTNSESAFAAWCRFGKREFKAGGE |
| P31213 | PGEISYRIPQGGFLTYYVSGANFLGEIIEWIGYALATWSLPA |
| Q32KU2 | PYLVLKSHFNPCVGLIKSNWVLAAPAHCYLPNLKVMLGNL   |
| A5PJA8 | NTSDPDMRREMEQSMNMLNSNHELDPVSEFMTRLFSSKSSD  |
| P27144 | ETLKDRLSRRWIHPSPGRVYNLDFNPPHVGHIDDVTGEPLV  |
| Q00059 | ERFQEAKGDSPOEKLKTVKENWKNLSDSEKELYIQHAKEDE  |
| P20645 | QDLGNLVDGCDVFCRSKPRNVPAAYRQVGGDQLGESEER    |
| Q96SJ8 | FRENLTREFFTKELTKHYQGNNDDTVFSATWNSVMITFGCC  |
| O00338 | TQLLPPSFWENNCKFLYVARNAKDCMVSYYHFQRMNHMLPD  |
| Q9BRP0 | DTFDLKRHRVTHTGIRPYKCNVCNAFTQRCSESHLKKIH    |
| Q3SZY9 | SGSVLDYFSERSNPFYDRTCNNEVVKMQRLLLEHLNQMVGV  |
| Q99J59 | DGTSFLKVFGSLSSAMQFVNVGYFLIAGAVLFLILGFLGC   |
| P01584 | LSTFFPFIIEEPIFFDWDNEAYVHDAFVRSLNCTLRDSQ    |
| Q9D1E6 | LTDFKPGYWGVVRYDEPLGKNDGVSNGKRYFECQAKYGAFV  |
| Q9CY52 | LRRCLRLGVAMAKSKFEYVRNFEVQDTCLPHCWVVRLDGR   |
| Q86Y82 | SAEERQREEQLVSDSHEEWNQMQSQEDEVATEQDLELIK    |
| Q29460 | RVVVLGGLPRGQHPNPLREKNRRVNELVRAALAGHPRAHFL  |
| A3KMZ6 | CQTTGLGGSVAVAGHASDQIENMVPVKDRIKIFNADVHAS   |
| Q8IZ81 | KTDFRMGILGLINLVYFSENNTSEAHQILSRSNHPKLGYS   |
| Q86WH2 | FVLRHEIEGEWEAFSLPELQNFRLRILDKEEDEQLQNLKRRY |
| P00920 | PALQPLLI SYDKAASKSIVNNGHSFNVEFDDSDNAVLKGG  |

|        |                                             |
|--------|---------------------------------------------|
| O88792 | SSPRVEWKFEVQGSTTALVCYNSQITAPYADRVTFFSSSGITF |
| Q8WUB2 | PDLTTGQKRYLCSIAKIYNANYLKMMLKRQYMHVLQHSSQK   |
| Q96EC8 | MRDLKAVGKKFMHVLYPRKSNLTLRDWDLWGFLIILCVTLAL  |
| Q99M03 | GQRKFPIL EEKAFSVHGARGNHMDFGQLYQFLNARGCGDVF  |
| Q0VCA9 | AIEESTRKVHYNI FHMWRHYNFARMRKTDFFLLQSNYNYV   |
| Q5SQ13 | AFPQDLSPAWPQKGAGTHPANAGPGPLSRSSQLRTPLEAG    |
| Q58DS5 | AMGIILVYDITDEKSFENIQNWMKSIKENASAGVERLLLGN   |
| Q8WV48 | EEIGDSQAWEEPWNSTETWNLATSWEVGRGLRRRCSQAVA    |
| P14138 | CHLDI IWINTPEQTVPYGLSNYRGSFRGKRSAGPLPGNLQL  |
| Q9NPA1 | PCLQVFNLSHPGQKALLHYNEEAQINPKCFYTPKCHQDR     |
| Q3ZBP0 | EEQIMIGDQKAGSSFQGDNLNAGKVKVDNFLDIEDLDLDE    |
| P12034 | ASAKFTDDCKFRERFQENSYN TYASAIHRTEKTGREWYVAL  |
| P62956 | TATPPFMVSLFLVFTA FVISNIGHIRPQRTILAFVSGIFFI  |
| Q9D5U5 | PNGVEAAIHCGMQVVMVPHENLSADLTKRATLVLSLHDFK    |
| Q8VH27 | SRLKMF AKELKLVFPGAQRMNRRGRHEVGALVRACKANGVTD |
| Q6ICL3 | TTDVDSL SYLKKVSMEGHLYNGFNLIAADLSTAKGDVICYY  |
| P05813 | SGSNAYHIERLMSFRPICSANHKESKMTIFEKENF IGRQWE  |
| P18917 | HQWTYNLVRGSCLLLLLVMSNLLLCQGI LCPSLCPDGDVVC  |
| Q5SS90 | PVGAPPASQIPGLS DLRDSPNVNLP RARRYWIKETDSEYVK |
| P21311 | KIAADCEAFISRARVLF EIANREVAYYNI RQEFNYSTEITD |
| Q6QRN6 | CARHLKLFYQPTIYYPKRPNKPLFTALVTQCQKMDIPFLG    |
| Q8BSU7 | QLPPGEDLNDWVAVHVVDFFNRINLIYGTISDGCTEQSCPV   |
| Q8VHW4 | RYTAEDMYRPHPGFYRPRLSNCS DYSQFLHPDAWIRGRSP   |
| Q5E9C4 | ILVFAVEILLTFKIKVMALNSAEKITKFL ENIPQDSSDAI   |
| Q9D3N2 | TFGMTDDMIMDRVFRGFDKNDG C ISVSEWHGLSLFLRGT   |
| P25393 | NFNQILMQLRMSKAALLLENSYQISQISNMIGISSASYFI    |
| Q91WB2 | DGARERRQSQQLPEEDCMQLNPSFKGIAFN SLLAIDICMSK  |
| P01915 | RRVEPTVTVYPTKTQPLEHNNLLVCSVSDFY PGNIEVRWFR  |
| O43704 | PMLEMTLPGLRTSGIEQLEKNPSPRIVKTHLPTDLLPKSFW   |
| Q4KUS1 | FDSQKHQCRAFLYSGCRGNANNFLTKTDCRNACMFVEKKGQ   |
| Q8N5J4 | SAADFYFEGNIHQSLQNI TENQLVQPTLLQQKGGKGRKKLR  |
| Q9BXN2 | KIDSSNELGFIVKQVSSQFDNSFWIGLSRPQTEVPWLWEDG   |
| Q8QZV2 | LPEGTMNNVYVMPTNF SVLNCQQATQIVPHGQYLHTPYV    |
| A7E2S9 | CVHQQLLEYKQKISKNSQNSNPEGTSEGT PDEAAPLAERTP  |
| Q5E9C0 | TLPRGFGLPALEVL DLTYNL NENSLPGNFFYLTTLRALY   |
| O95816 | HSIQNSQDMRQISDGEREELNLTANRLMGR TLTVEVSVETI  |
| P15947 | WQVAVYRFTKYQCGGILLNANWVLTAAHCHNDKYQVWLGN    |
| P70280 | TEQILAKIPSENNKLTYSHGNYLFHYICQDRIVYLCITDDD   |
| Q10738 | IIIGFARRDHGDSFPFDGFGNTLGHAFAPG PGLGGDAHFDK  |
| Q3T189 | FRRSCREGICGSCAMNINGNTLACTR RIDTNLSKVS KIYP  |
| P32243 | LFAKTRYPDIFMREVALKINLPESRVQVWFKNRRAKCRQQ    |

|        |                                             |
|--------|---------------------------------------------|
| Q91V08 | GLHRESSEHPWKWTDNTEYNNTIPIRGEERFAYLNNNGISS   |
| P40293 | RKRWQNMKFGADIQDDYEDENLYEGLNLDDCSMYEDISRGL   |
| O88452 | SQQKGRSLQNTAEIQHCLVNAGDVGCQVFEFENNSCEIQ     |
| Q9D9V4 | LDSLEYDIPRGSWSIQMERGNALVVLRSLLWPLTFYHAPR    |
| Q6GTx8 | PDSPDTEPGSSAGPTQRPSDNSHNEHAPASQGLKAEHLIYL   |
| Q9D7K5 | EEWIRPNNRSHFLAEIQKFQNVVPEAVDASGCAINYQGLSN   |
| Q3S2Z7 | KEKTKLGSADETETPAETHNLKHSVPLPAELSSSETKTKST   |
| Q91X52 | PHKAKAMLDRIPLGKFAEVENVVDITLFLLSNRSGMTTGST   |
| Q08DG5 | EFGQRCEAIISSPPPPCAQNPLHPSPSHSACKEPVVYPWM    |
| P68510 | KELETVCNDVLALLDKFLIKNCNDFQYESKVFYLMKMGDYY   |
| Q5VXU1 | QYRPRYITGYAVWLVLWVTWNVFVICFYLEAGDLSKETDLI   |
| Q497Q6 | IIEKVHSHKNIKKRRRQELDNFLKHSNKKGNAFIEHYDPKE   |
| Q78PG9 | ANSIQGCKMNNVNVVYTPWSNLKKTADMVGGQIGFHRQKDV   |
| Q17QR7 | HTGERPYECTECGRTFSDISNFGAQRTHRGEKPYRCTACG    |
| Q96S21 | DRWIKEIDEHAPGVPRILVGNRLHLAFKRQVTEQARAYAE    |
| Q9D7W5 | FNPGDTNALVAAVAFGKGLSNWRPSGSSGPGQPGGAGTI     |
| Q28071 | NQTDIYFCKLEVLYPPPYIDNEKSNGTI IHVKEKHLCPSPR  |
| Q8CJC5 | WAALLPEGFVRAGNVVCFWVNRRLWLFKAVNAGRPLLLRKD   |
| Q0VD00 | SPVSPLAAQGIPLPAQLTKSNAPVHIDVGGHMYTSSLATLT   |
| Q3UF25 | RIWFLDTSKQAIQMLFIHFANVYLADLTBEDPCSLYLINFL   |
| P05305 | SFRSKRALENLLPTKATDRENRCQASQDKKCCWNFCQAGK    |
| Q9JIQ3 | FGMTLCAVPIAQKSEPPQSLSNEALMRRAVSLVTDSTSTFLS  |
| Q7M3E1 | VCAGGDGVI SACNGDSGGPLNCQAENGNWDVIRGIVSFGSGL |
| Q3URF8 | IFSTSCLFLKLLGSKLLYCSNGLSSITSHLQDPNHLTLDW    |
| Q9NVL8 | LNRPNGSKNTEFLKHQAVNNYCPWKIGKMETWLHEQEAGG    |
| Q2KHY5 | MEASCLIIQLVQEQTREPSKNPFLRKKRALVSEPALLRVQ    |
| Q8R2M0 | LKKKMPREVLRLSTRIGHAVNKMRRHSDPEVAGLAKEVYTE   |
| Q99627 | IWSVGQRIWQRDFPGIYTTINAHQWSETVQPIMEALRDATR   |
| Q3SWZ3 | PDDEFFQKVRTIRQTIIVKLENKVRELEKQVITILATPLPEE  |
| P17918 | ARICRDLSHIGDAVVISCAKNGVKFSASGELGNGNIKLSQT   |
| Q9Y5K2 | PLYHPSMFCAGGGHDQKDCSNGDSGGPLICNGYLGGLVSG    |
| Q91WL6 | LEEIVTVRVQDPRVQNEGSWNSYVDYKIFLHTNSKAFTAKT   |
| Q8R2N0 | RGSVRKGGQFAFRRLKIQQNYKLLWKVKEAPASQESQFT     |
| P53004 | ETEKKSPLSWIEEKGPGLKRNRYLSFHFKSGSLENVPNVGV   |
| P49675 | MERLYEELVERMEAMGEWPNVKEIKVLQKIGKDTFITHEL    |
| Q3UV31 | VGLSKPAEPTLPVPVQDPAPNPGWLARCWARFRDWRVALV    |
| Q6UX52 | PANFSFLPSQTSDFWCQAANNANVQHSALTVVPPGGDQKM    |
| Q03358 | KLKMAAKPMLPSGFSLPFPINSPLQAASIYGASYPFHRPVL   |
| Q9D504 | DTDLAHKDIYGFTAEEYASFNQFTMYHHITANNENKKKTEQ   |
| Q24JQ0 | SCCASGFLGFFLMFSTVKLNLLAPGQCAAWIFFAKIITAG    |
| Q0II87 | RDGTSQVKLKAINENWKNLSNSQKQVYIQLAKDDKIRYYNE   |

|        |                                            |
|--------|--------------------------------------------|
| Q4VAE3 | IELSIGIILGISTMAAAALGNLVSDLAGLGLAGYVEALASR  |
| Q96LT6 | EELKGLGFLTFLGLHILEIGENSLIVSPEHVCQHLEQVLLGT |
| P19652 | TNATLDRITGKWFYIASAFRNEEYKNSVQEIQATFFYFTPN  |
| P48758 | AFKVNDTTFPHIQAEVMTKTNFFGTRDVCHELLPLIKPQGR  |
| A5PLL7 | HRIHHVSPHETYFCITTTGWLNYPLEKIGFWRRLEDLIQGLT |
| Q8R1Q0 | KTFIVRQLEVAGKEVSEEEVNDMLHHGKWEVFNESLLTETS  |
| P30404 | KGSTFHRVIPSFMCQAGDFTNHNGTGGKSIYGSRFPDENFK  |
| P08294 | VHAGEDDLGRGNQASVENGNAGRRLACCVVGVCGPGLWER   |
| Q29974 | RWFLNGQEEKAGMVSTGLIQNGDWTFTQLVMLETVPRSGEV  |
| P28585 | QQKLAELERQSGGRLGVALINTADNSQILYRADERFAMCST  |
| Q12846 | VSDEELEQMLDSGQSEVFSNLIKDTQVTRQALNEISARHS   |
| Q9Y5N6 | LNSNIGIRDLAVQFSCIEAVNMAKILKSYESSLPQTQQVD   |
| P62696 | LSSLRPIKVDSQEHKILYENPNFTGKKMEIVDDDVPSFHA   |
| O35166 | IEQIFSHLERLEILSSKEPLNRRQNAKLRVDQLKYDVQHLQ  |
| Q8BL95 | LWAAKELRRTKKLSDYVGKNEKTKIIVKIQRGGQAPARE    |
| Q13907 | ILIDENDNKIGAETKKNCHLNENIEKGLLHRAFSVFLFNTE  |
| A9UHW6 | REQLRARSLOGWVCYVTFICNIFDYLRVNNMPPMALVNPVY  |
| O08992 | PSLEDLKVQVIAQATAYSANPASQAFVLVDASAALPPDGN   |
| Q9D883 | KYGEVEEMNVCNLDHVLGNVYVKFRREEDAOKAVIDLNN    |
| Q6P575 | PPHPVVFLPGTGYPKGYFVQNTDFDFFSYAGLLWSLLYTT   |
| Q8BIX3 | HVKIYIDRFEDLQKSCDFFNIHKKLAKKNLHVIDLDDATF   |
| Q96HV5 | ILNIPIVQFFFVLIIGLIPYNFICVQTSILSTLSTLSDALF  |
| O77512 | EMADDFDHYTNTYQIYSKDLNQCESLATSVDINWKQHLQI   |
| Q8N7R0 | TQGCLVNPTGNLPMWSNQTNWNSWNSQTNIQSWSNHSWN    |
| Q91WG1 | NVVIRGVVLFVIGVFLALVNLQIQRNVTLPDPDVTISIF    |
| Q99801 | ETLAETEPERHLGSLYLDSENTSGALPRLPQTPKQPQKRSR  |
| O95983 | GSMDLSTDFRTGKMLMSKMNKSRQVRVYDSSNQVKGKFDL   |
| P25731 | NTGNVRVGIKDAFFCKKTSINNDDCIKKTYNKNIYPGSSFD  |
| P16562 | SLKYYVVCQYCPAGNNMNRKNTPYQQGTPCAGCPDDCDKGL  |
| G3X9C2 | HVFRQYGPVRFVYFQHKAKNRMEPGGLRRTRVTDSSVSVQ   |
| Q2M2T2 | WKYTPMGRDAAGQLWYTLTNSDSREAWYTLPRAPDSPYRE   |
| Q59I47 | HRSYVTRYCQGPQVFLGMNPGPFMAQTGVPFGEVSVVR     |
| P27348 | TEQGAELSNEERNLLSVAYKNVVGRRSAWRVISSIEQKTD   |
| Q8MJ87 | LVYMGFDAAKAAALRVFRDNVQLAAQTLVHNGGRLPPDLQ   |
| Q6PEB6 | KECPAIDYTRHTLDGAACLLNSKNYFPSRVS IKESSVAKLG |
| Q9D241 | IALLMSTLFCCHPQSQSNWLCPRTLFCREQKQTQITSI     |
| Q3T0Z7 | RARNWWASIDVQENEEASANVVVKMTDSFTEQADQVTAEV   |
| O95843 | MQEKMEQKWKWYFKLYDADGNGSIDKNELLDMFMAVQALNG  |
| Q8N1D0 | EHAHKPELTTPDSGLPRFPNLAGFRALAQHSPPLGTST     |
| O35164 | VRKRECTQKIKVEKYILPPNYVSSKFNDIVLLKLLKQAN    |
| Q6PHZ8 | SISAQLEEASSTGGFLYAQNNTKRSIKERLMKLLPCSAAKT  |

|        |                                              |
|--------|----------------------------------------------|
| Q2QD12 | MLDSGADYLHLDVMDGHFVFNITFGHPVVESLRKQLGQDPF    |
| Q924T2 | PYIFGNRLGQDIIDLDQ TALNLQ LALNFTA HVAYRKGIILF |
| Q9D1N2 | VVKAHPQSDGANLPKSGKANQPQSGGAGYPSGWTKFGNIA     |
| Q86UA6 | EKSLQFDEKCLSIMLAWEANPLICPVCTKYNLRTSGVVV      |
| Q8NBQ5 | IYSSAKVKAEIGDVSILVNNAGVVYTSDLFATQDPQIEKT     |
| Q9JKT3 | LIHSLRRHIQKMQRNRTSFWNPQTEAHMGAMRLMICFLVLY    |
| Q95407 | LEHASCPPGAGVIAPGTPSQNTQCQPCPPGTFSSASSSSSEQ   |
| Q9QYN3 | TDGCEQRRMATESFPHPDFNNSLPNKDHRNDIMLVKMSSPV    |
| O00584 | EVQTIQIQLCLTKQDQQLQNTCEPGEQSPKQEVWLANGA      |
| P24592 | AEENPKESKPQAGTARPDVNRDQQRNPGTSTTPSQPNSA      |
| Q3TDE8 | HTGERPYECTECGRTFSDISNFGAQRTHRGEKPYRCTLGG     |
| A8MVS5 | RDRESCWAQINFSDTMSFDNSLFTVSAKTMPEEDPATLDD     |
| P40617 | RISENQGVPLIVANKQDLRNSLSLSETEKLLAMGELSSST     |
| Q2HJF5 | EVEGISVGAILSDYQVRVVENVCKRLNLQPLAYLWQRNQED    |
| Q14681 | GNEDQAEFLCVVSRELNNSTNGIVIEPSEKAKILQERGRM     |
| Q96FV3 | LGALFLAIGLWAWGEKGVLSNISALTDLGGDPVWLFVVVG     |
| P60487 | APELLQRLARAGKNTLFVSNNSRRARPELALRFARLGFAGL    |
| P39942 | AFSLAEAKFTAGDFSTTVIQNVKAQVKIRAKKDNVAGVTL     |
| Q6BDI9 | QKLKEYLGFYPPSKLCPAANTLNEIFLIHFITFCQEKGV D    |
| Q9BXY4 | EANNHTMECVSIVHCEVSEWNPWSPECTKKGKTCGFKRG TET  |
| Q6BCY4 | TRRRFRGLPSPDHVLGLPVGNYVQLLAKIDNELVVRAYTPV    |
| Q8WUE5 | GPSDSGTRVLIQCVTSINEDNIYISNSIYFSAIVSEDFVP     |
| P06748 | TVSLGAGAKDELHIVEAEAMNYEGSPIKVTLATLKMVSQPT    |
| P55327 | SQVLAAKEKHLAEIKRKLGINSLQELKQNIAGWQDVTATS     |
| P10415 | VNREMSPLVDNIALWMTEYLNRLHHTWIQDGGWD AFVELY    |
| Q9CQ37 | RPSLNIAATVLTSLQLLMAEPNDDPLMADISSEFKYNKIAF    |
| Q3SZR9 | VFVTEVVVVVLGYVYRAKVENEVDRSIQKVYKTYNGTNF DA   |
| Q64008 | LKVAQEIKAEYWAVS SLTGENVREFFRVAALTFEANVLAD    |
| Q32L49 | QRHLLSGEFDQLRDFRIFESNFVQVTRLGEVANKVTMGVAA    |
| Q9Y3Y2 | PSVQAALKLKQSLKQRLGKSNIQARLGRPIGALARGAIGGR    |
| Q8WXF0 | RSKSLPRRSTSARQSRTPRRNFGSRGRSRKSLQKRK SIG     |
| P12961 | NKKLLYEKMKGGQRRRRSVNPFYLGKRLDNVVAKSVFHF      |
| Q13868 | VKRQKTHFHDLP CGASVILGNNGFIWIYPTPEHKEEEAGGF   |
| Q8JZX9 | PRLHLESPQSPQPS PQGAGNV DVWRIP EAGSPHNGMSEP   |
| P47741 | ALYLLRKAWRLPNTPKPCWGNSFRTPIQEHTDAHFTLAKI     |
| P70452 | ELHEIFTFLATEVEMQ GEMINRIEKNILSSADYVERGQEHV   |
| B7ZW38 | KIAGCSVHKGF AFVQYDKEKNARA AVAGEDGRMIASQVVDI  |
| O35166 | QVREQQERQRDELLSRTFTTNDSDTTIPMDES LQFNSSLHN   |
| Q9D4F2 | LDLLLVAVIKGLVRRRRPAHNQKDMFFTLSVDVRYSPSGHA    |
| Q08D83 | VDSLKLAVFMWLMTYVGAVFNGITLLILAELLVFSIPIVYE    |
| Q9Y5N6 | NKETYQSCLKSFECLLGLNSNIGIRDLAVQFSCIEAVNMAS    |



|        |                                            |
|--------|--------------------------------------------|
| A6H759 | LHGITFLTRNYCLAELYLNNAIFDIEGLHYLPSLHILLH    |
| Q3UPR9 | CSGDGLSDGNQTLRWQAIGNPRCQGTWKKVRRVEQCSCPD   |
| O88822 | SAADYFFTPYVYPATWPEDNIIRQTISLLIVTNLGAYILY   |
| Q3KNV8 | TVTECLHTFCRSCLVKYLEENNTCPTCRIVIHQSHPLQYIG  |
| I3L3R5 | EERKRGPMEFEDLWQRHLENGGDLQKRVAEKASDKETAQF   |
| P06346 | CRHNYEGVETPTSLRRLQPNVVISLSRTEALNHHHTLVCS   |
| Q925G2 | LFFVLKHPYSHSFPPEGVFTNTLGLLILVFGALIFWIVTRP  |
| P09056 | AVSLQVKLNATIDVMRGLSNVLCRLCNKYRVGHVDVPPVP   |
| Q8N5I3 | LNPYLLQPRPALVEVHFLSRNTQAFFRVFGSCSKTIEMLTG  |
| A5PKE4 | VIDIKRWKTMLELPDQSKENLVEALRELKKKIPSRVCLKS   |
| Q8R3S2 | ASKVIYTNGCIDKLVNWIHSNLFLLGGVALGLAIPQLVGIL  |
| Q07699 | VVWNGSRGTKDLQDLSIFITNVTYNHSGDYECHVYRLLFFE  |
| Q6PCP5 | GVPNASVIMQVPERIVVTGNNEDISFSRPADLDLIQSTPFK  |
| P08218 | GTILPNNYPCYVTGWGRLQTNALPDDLKQGLLVVDYATC    |
| Q58DM8 | RNSNVGLIQLNRPKALNALCNGLIVELNQAQAFEDPAVG    |
| Q9D504 | NGRDKRSRTPHLACANGYTNIVSLLIENQCKINVQDSENR   |
| Q8K3A0 | HCRAHQPPDPTRDYFSLMNCNRSFRVDVTKLQHRVQQLQRL  |
| Q9GZV9 | IFGSHYFDPENCRFQHQTELENGYDVYHSPQYHFLVSLGRAK |
| Q2YFS1 | FIYNSMPPFIHEHFKGRILINWTQGGQTSGLVRLINFKESDQ |
| A6H7B8 | CILWRLTKKHTVSQEDRKSYNWKQRLFIFNFVSFFTALAVY  |
| Q9D7A8 | RAIVQDQGCLPGLILFMDHPNPPVHSAALLALRYLAECRAN  |
| Q148G4 | ALMDLGLYIGFNGCSLKTEANLEVLKSIPESEKMIETDAPW  |
| Q8N966 | FSPALLHGALFLFLSANALGNVVLVIQNSPDDLGCQGASA   |
| Q96NL8 | VVSYYDDYMDKSCDYLFFRNNMPEFHKLKAKLIKKKGTRAY  |
| Q8BHL8 | SQIRSGIITPIHEQWEKARANSPPREFFPATAREVDPLQIS  |
| Q8NG11 | WDESIFTRGCIQALESWLPRNIYIVAGVFIASLLQIFGIF   |
| Q5E9C8 | RFGGWFAIRGVVLLRGTEVPNLPPTKPVDCVPTRADRISLL  |
| Q8K396 | YYWAFPSKALHARKRKLALNSQLSEGSQKHADLQKSIEKA   |
| P0DMR1 | PPPPPIALAVVPSKRQRISGNTSRRGKSGFNSKSGKRGSSK  |
| P14190 | KLFGSLSRNDILGQIQRVNANITSLVDVAGSYRENMEYTDG  |
| P56966 | RRGFVAHSIYGIPSVINSANYVYFLGLEKVLTLNHPDAVK   |
| Q61754 | LNPNWVLTAAHCYGNATSQYNVWLGKKNLQREPSAQHRWV   |
| Q9NSI2 | LPPELLGLEAGSRRQARSRESNKPRPSELRSMSAAQRQQLLE |
| Q3KNI6 | KDPSTACCQELVVKIKLPNTNPSEIQIDIQEMLLDLRTPRK  |
| B6A8C7 | ILESPKPLDSTEGAAEFHLNLLKVRNAGEYTCYYRKASPH   |
| Q9GZX9 | LSHHENLVSFLETVNQPHHQNVSPSNVHAPYSSDKEHMC    |
| Q0VCF3 | YKPHILLSQENTQIRDLOQENRELWVSLBEEHQDALELIMSK |
| O08337 | VTRLDRWETELNEALPGDARNTTTPASMAATLRKLLTSQRL  |
| P62753 | PRVLQHKRRRIALKKQRTKKNKEEAAEYAKLLAKRMKEAKE  |
| Q02105 | LYYFVYYTSHANLCVHLNLNLARVASFCDHMFNSKQVSSG   |
| Q9P0N9 | LNTKYRDSLPLQPKAFEQYLNLEDGRLLTHLRMCSAAPKLP  |

|        |                                             |
|--------|---------------------------------------------|
| Q8BGZ2 | EFQFLHSAYATLLMKQAWPQNSSSCGTEGTFHLPVDTGTEN   |
| Q9BZX4 | ELAQMWKVVNLPDLDLNSVMNVGRFTEEIEWLKFLALACSA   |
| P09021 | APPAQPQIYPWMRKLHISHDNIGGPEGKRARTAYTRYQMLE   |
| Q5SVD0 | ERAPVAGTLEPDAAVTPIVNPASLTHSLAAICSPRLCPLS    |
| Q5EA33 | DSKDTLELLLMNRYIKPGLKNSLEETAFDIARRTGIIHYLF   |
| P41976 | HINAQIMQLHHSKHHAAYVNNLNVAEEKYREALEKGDVTAQ   |
| O00584 | LYRELDLNSVLLKLGKPSINYQVADFKDALARVYGVIPK     |
| A6NIK2 | ERLPDGLCRLPRLRLRYLGGNRLALPADFAQLQSLRCLWI    |
| P36369 | GIDAAPPLQSRVVGGFNCEKNSQPWQVAVVYQKEHICGGVL   |
| P20160 | QLDREANLTSSVTILPLPLQATVEAGTRCQVAGWGSQRSG    |
| Q9NVV9 | KYSSICSEHFTPDCFKRECNNKLLKENAVPTIFLCTEPHDK   |
| O15400 | LGMMIHEQGDVIDSIEANVENAEVHVQANQQLSRAADYQR    |
| Q6NZE7 | LSPSLQMFVSSSGMPPSPVLNPRHFSRRSQSPVKCIRPSVL   |
| Q99750 | PLLPNDSGHPSELGGTRRAGNGALGGPKAHRKLQTHPSLAS   |
| Q3ZCD8 | TLSERPLDFDLERPAPTQNEEIRAVGRLLKRERSMSENAV    |
| Q96EI5 | KPEVTCTLEDKLENEGKTENKGTGDEEMLKDKGKPESEG     |
| P02763 | TNATLDQITGKWFYIASAFRNEEYKNSVQEIQATFFYFTPN   |
| Q9BXU9 | MKDIENIIINEEESLNETSGNCQTEFEGVHSQKQNRQTCVR   |
| Q8IW03 | HLRHHAPHHLHHQEAGLHANPVTCLCMCPLFSCQWEGRL     |
| Q86V81 | GTADVHFERKADALKAMKQYNGVPLDGRPMNIQLVTSQIDA   |
| Q96GG9 | KMEQELKEPGRKDFYQFTFNFAKNPGQKGLDLEMAIAYWN    |
| Q9Y6H3 | KHSGCAVNKDRHFSCEDCNGNVSGGFDASTSQIVLCQNNIH   |
| Q15773 | MSRMLSGGFGYSPFLSITDGNMPGTRPASRRMQQAGAVSPF   |
| P10628 | RSRTAYTRQQVLELEKEFHFNRYLTRRRRIEIAHTLCLSER   |
| A2VDH3 | FESLESQVLELNDNNLRSLNVAALDALPALRTVRLDGNPW    |
| P41317 | TLTEGVQNSCPVVTCSPLNGFPKDGKRDGAKGKGEFGQ      |
| Q9WUJ8 | NKMMYQSCCLKSFECLLGLNSNVGIRD LAVQFSCTEAVNLAA |
| Q9EQC7 | CRAAPCPVPSNPGQELCGNNVTYISSCHLRQATCFLGRSI    |
| Q6UWV2 | VGNVYKGDASISISNPTIKDNGTFSCAVKNPPDVHNNIPMT   |
| O70552 | GHWHPDCPSKGQAFRCIRINNENKDPVLERACAESNVNFF    |
| Q6IPT2 | QRYLQSGEFDQFRDFPIFESNFVQFCPDIYPAPTSDLWPQV   |
| P50553 | VKLVNLGFATLREHVPGAANKMKSQVETLRSAYEYIRALQ    |
| Q8R023 | CSVRAEVRHLRRVLCRMLNLPQHVQLLFDNEVLPDHMTMK    |
| Q9Y277 | SQNNFALGYKAADFQLHTHVNDGTEFGGSIYQKVNEKIETS   |
| Q3MHR7 | SKAYIHTRMRAKTSDFLKVLRARPDAAEKEMKTIITGKTFS   |
| Q5T0U0 | VAKQQSQASEIEKNKVLNKLHELEKEIAAISAEATK        |
| Q2KHY8 | HIPSMRRESEGDRVPCSCYNSSATNDSTIFDKISPQFSRL    |
| Q3UFY7 | MDFSSEDGFLKGFKQLIHTYKNSSVCENSSYFQQLQNKTN    |
| O70378 | NSYVIAGYYQANERVKDASPNQVAEKVASRIAEFGDAALI    |
| P97436 | ERKFSHQYLSAPERAHAKNLKLTETQVKIWFQNRRYKTK     |
| Q8BSU7 | PGEDLNDWVAVHVVDFFNRINLIYGTISDGCTEQSCPVMG    |

|        |                                            |
|--------|--------------------------------------------|
| Q5HZK2 | VCSHGTSVEESTWYGFDFYPNLFYNDWLGTTTLPYNPERIP  |
| P20783 | NSPVKQYFYETRCKEARPVKNCGRIDDKHWSQCKTSQTY    |
| Q7Z3S9 | ETDVNECDIPGHCQHGGTCLNLPGSYQCCLQGFTGQYCDS   |
| Q923D2 | ADVDKTVAGQEAVIVLLGTGNLSPPTVMSEGRNIVTAMK    |
| Q15102 | LENGELEHIRPKIVVVVWGTNNHGHTAEQVTGGIKAIVQLV  |
| Q96EQ8 | VRTRCGHVFCRSCIATSLKNNKWTCPYCRAYLPSEGV PATD |
| Q3T112 | YYVDENGTRLSGNMFSTGSGNSHAYGVMDSGYRPDLSEEA   |
| Q3T113 | EELLWYREDGRVDLKGSKNKINSSVVCVSGISEDNGITFTC  |
| Q9BRU9 | PHFKNAVSGSECLLSMVEEGNPHHYFVATQDQNLVSVKVKKK |
| Q8K386 | QQLAKEYGMDFYETSACTNLNIKESFTRLTTELVLQHRKEL  |
| Q9CRC9 | RLVILDNYDLASEWAAKYICNRIKFKPGQDRYFSLGLPTG   |
| Q8BZI6 | YQGHFIVLRGYNRATGCIFYNNPAYADRMCSSTISNFEEAR  |
| Q9DBU2 | HISTTAQDHCKAIYLHVLTTNNTAINFYENRDFRQHLYLPY  |
| Q077R2 | TKISNQIHFMETEKVFFSYSNYIEKDFVITGVFSSPPEIN   |
| P19256 | TSIYFKMENDLPQKIQCTLSNPLFNTTSSIIITTCIPSSGH  |
| O43399 | RHCGELKRRLGLSTLGELKQNLRSWHDVQVSSAYVKTSEK   |
| Q8VCR9 | ASRRGRGRLARLSGPEATCNSRPAARGRQRAAAPRMPAPE   |
| P61087 | LAAAEPDDPQDAVVANQYKQNPWFQKQARLWAHVYAGAPV   |
| Q3ZBS1 | TPCSFMRRTVSGYQILHMDSNYLVGFTTGEELLKLAQKCTG  |
| Q8WXH6 | LPLPSTLRSHLKSFSMAKGLNARMRGLSYSLTTSSSTHKSS  |
| P97371 | EKKKGDEDDKGPVPCGVNCKEIVVLLQRLKPEIKDVTEQ    |
| Q9Z2H6 | TCCPVSWRAFQSNCFPLNDNQTHESERNCSGMSHSLVTI    |
| Q9DCY0 | NSLRKHLPESLKVYGTVFHINQGNPFKLTLDKWPDFNTV    |
| Q925G2 | IVTRPQWKRPREPGSVPLQLNGGNAECRMEGAIAISSAHSM  |
| P37141 | IDGEEYIPFKQYAGKYILFVNVASYUGLTGQYVELNALQEE  |
| A6H789 | ANNPWHCDCTLQOVLRSVMVSNHETAHNVICKTSVLDEHAGR |
| O35975 | SPEKKSNFNCFYNGSAQTVNIDFSISGSRSCVSLFLVVL    |
| Q8R3T5 | EGSTSFVRRSQWMLEQLRQVNGIDPNRDSAEFDLLFENAFD  |
| Q8N5S3 | KPCSGIVPLASPGTSAELQNNFIEYISFIHQYDARKTPNEP  |
| P20108 | VAVSVDSHFSLAWINTPRKNGGLGHMNTLLSDITKQISR    |
| Q8NEG2 | VRAVSMPDYMVHEEFNPQANGSYASRRGPFDFDMKTWVQR   |
| A2VE67 | EVWGDEQADFCNTLQPGCKNVCYDHYFFISHIRLWALQLI   |
| Q96MV1 | FSKAVSPGFNSLSFKKKIEWNSRVVSTCHSLVVGIFGLYIF  |
| Q58DF9 | SDLRYFFLFCIQVEILAGEFNDSAASEMFI FHNGGVQILCK |
| Q13326 | EIHSRVDSLLQSTQNVTVNARNSEGEVTGRLKVGPKMVE    |
| P00915 | PATAKEIINVGHSHFVNFEEDNDRSVLKGPPFSDSYRLFQF  |
| Q2YDG1 | QQQATPRLFSGGLQDLLLLPQNQFAMFLYCFIFIHIIVYTKE |
| Q969E2 | TLGVNLIACLAWWIGGGSGTNFGLAFVWLLLFTPCGYVCWF  |
| Q0P5H5 | FLAVQHECGPMDKGAGTGPKNEEKREKMKRTLLKDWKSRLS  |
| Q8BR70 | GGNISFFQSLCVLGYCILPLNIAMLICRLLLAGQGPINFM   |
| O18870 | NENESQISTDESENSRSPLNKPNNIRSRAAPWNSFLPPPP   |

|        |                                             |
|--------|---------------------------------------------|
| Q2HJH8 | SESSGEWLTGTEVKKIEAINVPCQLSMSFFNRLYDEAIV     |
| Q92506 | RGSIINISSIVGKVGNGQTNYAASKAGVIGLTQTAARELG    |
| Q9DAE8 | ELQGLGFLEPGLHILEIGENNFIVSPEYACQHLEQTLTGTV   |
| Q6PZD9 | SPLLKAPSPAGPSHKGKAVNKDSLEYLRRRERNNAVRKS     |
| Q8WW43 | MFRFAYYKLLKASEGLKSINPGETAPSMRLLAYVSGLGFG    |
| Q9UBD9 | TYDLTRYLEHQLRSLAGTYLNYLGPFFNEPDPFNPPRLGAET  |
| Q5VST6 | YADIEAAWLALRTRYGIRPENVIYQSIGTVPSVDLAARY     |
| Q9D939 | EDMKRNPKEIQKVMQFMGKNLDEDVVVKIVLETSFEKMKKE   |
| Q9BXJ2 | GKFICAFPGIYFYSYDITLANKHLAIGLVHNGQYRIKTFDA   |
| Q99388 | LTIVIIAIVSQSLQLRKECFNPFVYGLHNRDLQSKLYPWLC   |
| Q96E09 | VRMHSSRLHQIKQEEGMDLINRETVHEREVQTAMQISHSWE   |
| Q9CY50 | EMGTSSQNDVDMSWIPQETLNQINKASPRRQPRKRAQKRSV   |
| O60499 | AVQEMKDHMVSPTAVAFLEARNREILAGKPAQKSPSDDLDD   |
| Q07699 | VTYNHSGDYECHVYRLLFFENYEHNTSVVKKIHIEVVVKAN   |
| O09101 | VPCLCLLGNLKAWLRFVSRNGVTSIWENSLQITTISSFTG    |
| O88456 | SFLKGGGGGGGGGLGGGLGNVLGGLISGAAGGGGGGGGGG    |
| Q2TBU3 | DYTHEFHKTKANFVAIIRERENLMGSRVKDIESYKSGSGVNN  |
| P54149 | PQEALPGRKEPLVVAAKHHVNGNRTVEPFPEGTQMAVFGMG   |
| A7MBB3 | AWICILRYQLRDWGVKWHNQVILWTGLLALGTSIVGNF      |
| Q9BQI9 | IHQESRRKTSRTEIPALLVNCKCQDQLLRVAVDGTGTQYNR   |
| Q96EC8 | VMFAWSIVASTAFLADSQPPNRRALAVYPVFLFYFVSWMI    |
| Q9JJE4 | TGYRPASSGSGCLRSFLYLHNELGNIYTHGLALLGFLVLP    |
| Q8K1I3 | VYDYDPSSLQEALSASVAKVNSQSLSPYLFRATRSCLKRVN   |
| Q6UX65 | LNKAGLVGLSCLGLSIVANFQKTTLFAAHVSGAVLTFGM     |
| Q9NYP7 | TFICSVIYLLIVWLGPKYMRNKQPFSCRGILVVYNLGLTLL   |
| Q96A35 | KQGVVQVIRQRNWWVVGGLNTHYRYIGKTM DYRGTMIPSE   |
| A6NLU5 | PRELLHELALSVPGARSKVTNKDATKISTVRVQGNDISHRL   |
| Q9JKY0 | QEIVNIYPSINPPTLTAHQSNRVCNALALLQCVASHPETRS   |
| Q8TCT1 | AAPGQRLPESLRATYREGFYNEYMQRVFKYLGEQGVPRDL    |
| P31098 | NSVSSEETDDNKQNTLPSKSNEDPEQTDDLDDDDNSQDVN    |
| Q6UX52 | LIGKDGQVHLQQRPCRQPANFSLPSQTSDFWCQAANNA      |
| Q9BQY4 | IWFENRRAKWRRHQRALMARNMLPFMAVGQPVMTAAEAIT    |
| P36369 | LSLGGIDAAPLQSRVVGGFNCEKNSQPWQVAVYYQKEHIC    |
| Q14CZ0 | RTIRREDLISFLCGKVPFPRNSRAPPRLLTVVSPNRATSTET  |
| Q08DY9 | RSSFICVLLSHGEEGIIFGTNGPVNLKKLASFFRGDYCRSL   |
| Q9Z0F1 | ATALLWLSCSIALLRALASSNARAQQRAAQRRSFLNAHRS    |
| P49772 | WIEQLKTVAGSKMQTLEEDVNTEIHFVTSCTFQPLPECLRF   |
| Q07444 | WEESLQACASKNSSLLCIDNEEEMKFLASTLPSSWIGVFR    |
| Q96BH3 | ALVPGFPCHFPFNYKNKNYFNCTNEGSKENLVWCATSYNYD   |
| Q58DS9 | SLAPMYRGAQAAIVVYDITNTDTFARAKNWKELQRQASP     |
| Q8N9N7 | GALPPQLCSLRHLDVMDLSKNQIRSI PDSV GELQVIELNLN |

|        |                                              |
|--------|----------------------------------------------|
| Q3SZ90 | GRKVVVVRCEGINISGNFYRNKLYLAF LRKRMTNPSRGP     |
| Q61806 | LSNMFMEQQKFIHESLTLQKNRMEEFKSLCEKYLEKLEVL R   |
| P01882 | EMRNGNYTMVLQVTVLASELNLNHTCTINKPKRKEKPFKFP    |
| Q9Y5K2 | QMVEASLSVRHPEYNRPLLANDMLIKLDES VSESDTIRSI    |
| A6NI73 | RLVKEGSPEPWTQNPLEPKNKARFSIPSMTEHHAGRYRCY     |
| Q3V2Q8 | SRANRNQGRNSEPSSSGGYWNTYTELPNRRANGLYSNEGYR    |
| Q8VHQ4 | LPLPVTIKSHLKSFSMANGMNAVMMHGRSYS LASGAGGSGS   |
| P0C646 | IIPHSYCEHIARLACGNINVNIIYGLTVALLSTGLDIVLII    |
| Q3T116 | ADWIAEPVRQKMALTHKNKINRAGELILTSEYSRYQFRNLA    |
| Q58DH1 | SIPVPESNICCHYCNQMI PGNKYFHHLDRCRVSGAVTFSP    |
| Q5UBV8 | SYEPARLLTGSKSVCEISNNWFQSLYL GAMFSL EEGDRLM   |
| Q96L08 | ALSLSGSSSSPQAQVMVHMANPRQPLPASGLATGMPQQPAA    |
| P09926 | PELQEYTRGKKYQRLSSSFSNFDYAAFEPHIVPSTKNRHQL    |
| Q3MHP2 | IGDSGVGKSNLLSRFRNEFNLESKSTIGVEFATRSIQVDG     |
| Q91ZW8 | VDGSPLSPSFTRYWNRGEFNNVGD EDCAEFSGDGWNDLSCD   |
| Q62276 | ETLLQSYNKRLKDDIKSIMDNFTEI IKTAKIEDETQVSRAT   |
| Q62189 | GFKEVRLVPRHDIAFVEFDNEVQAGAARDALQGFKITQNN     |
| Q64374 | CCFGKDYSEMYVTCARDGLNAEGLLRQPDAGNIFKITGLG     |
| Q3TLP5 | RGMEVDIASGMAIEQMCAQNIPTQDRLEGMAAFREKRAPK     |
| P30041 | PVCTTELGRAAKLAPEFAKRNVKLI ALSIDSVEDHLAWSKD   |
| Q9JHL0 | LLLGATAWLCVHCSRPGVKRNEKIYEQRNRQENAQSSAAAQ    |
| Q9CR58 | CLLQTWKNEGFFALYKGFWPWNLRLGPNWNIIFFLTYEQLKK   |
| Q8N4S7 | PASSGSGCLRSLFYLNELGNIYTHGLALLGFLVLPMTMP      |
| Q1JQA4 | KTIDKERLSVQNVIVRGCTNAVLMWFTDNYTIMAGVLLGI     |
| Q8HZJ5 | ENPDIVLIGNKADLPDQREVNERQARDLAEKYSIPYFETSA    |
| Q8WUK0 | TVLLGALPLRSLTRQLVQDENVRGVITMNEEYETRFLCNSS    |
| O60762 | ADLSHHPKFIPEFIRKQKEGNFDIVSGTRYKNGGVYGWDL     |
| Q9XT98 | FAFFSAGFLVVATWTDWVMNADDSLEVSTKCRGLWWECVT     |
| Q3TQI7 | SNQMLSGIPEVDLGDIAKIKNIISTEDAKARLLAEQQNKKK    |
| Q5JQF8 | KNLGKTIDNKALYNIFSAFGNILSCKVACDEKGPKGYGFBH    |
| Q9NP55 | GLLDSL TGI LNKVLPELVQGNVCLVNEVLRGLDITLVHDI   |
| P30281 | WMLEVCEEQRCEEEVFPLAMNYLD RYLSVCPTRKAQLQLLG   |
| Q9NRX1 | GKEETRKI PV PANRYT PLKENWMI FTPIVEHLGLQIRFNL |
| Q91VT1 | QSQTNFICPITQLEMKKPVKNKMC GHTYEEEAIVRMIESKH   |
| P30048 | LALRGLFIIDPNGVIKHLVNDLPVGRSVEETLRLVKAQFY     |
| Q96S19 | AAGHLLKPRALLITYGPIYINGKIS PQSNVDFDMLRCRNP    |
| Q9D9G2 | ALDGALYLLVMVDPDAPSRSNPVMKYWRHWLVSNITGADMK    |
| Q62276 | LKQFLILNDFPSVNEAIDQRNQQLRALQE ECDRKLITLRDE   |
| Q8TED1 | IVLCTVTLFLLQLKFLPKINSFYAFEVKDAKGRTVSLEKY     |
| Q5E9L0 | TATYWANLWKT CVTDSTGVS NCKDFPSMALDGYIQACRGL   |
| P50289 | FEGGKLQFMVQGCENMCP SMNLF SHGTRMQIMCCRNEPLCN  |

|        |                                              |
|--------|----------------------------------------------|
| Q9DCZ9 | VSGLGFGIMSGVFSFVNTLSNSLGPVTGIGHGDSPOFFLNS    |
| Q2MH31 | TGMESVRGMPLEYPPKQERLNAYEREVVVNMLNSLSRNRTL    |
| O54830 | RINLSEGTFGIDDDILPIYKNIETKIAELLEDSKSILSQAY    |
| P32043 | ACSAAAPGHALGRDEAAPLNPGMYSQKAARPALEERAKSS     |
| P51164 | EEGKPCFI IKMNRIVKFLPSNGSAPRVDCAFLDQPRELQGP   |
| Q9UKK9 | AVCMDPGLSNCTIHIVTVTINGDDAENARPKPKPGDGEFVE    |
| Q3T123 | EPMDTDDSNNCIGQNEQQRENSGHRDQIIEKDAALCVLID     |
| Q9JJW0 | THQMHSFLAAFIGLLLFGENNNINSQINMYLTSRVLYALC     |
| Q9CQ58 | LNVMQDVPETILSKVRQIEENKRKLEDLRWILTQVYPTAE     |
| O55023 | VYSCVEDKMYTGRKKGAFNGQKLVQSVQEDITKSLLVTE      |
| P20645 | INKSNGKETVVGRNLNETHIFNGSNWIMLIYKGGDEYDNHCG   |
| A5D7F5 | TIGIDYGVTKVQVRDREIKVNI FDMAGDPFFYEVRNEFYKD   |
| P0C7V0 | SSALSHQGWKNTRCATRGLVNTLVNTGHFLYLQPPAPLIMP    |
| Q3T0F5 | KVILGDSGVGKTSLMNQYVNNKFSNQYKATIGADFLTKEV     |
| Q91VT1 | EKVPDLKLLVEKKFLALQDKNSDADFKENEKQVFKQQLRE     |
| Q8NG11 | YYRYRNAKVSQWYKYLFSYNII FWLAGVVFLGVGLWAWSE    |
| Q8MJ87 | ELDQIKKEEREKKRRLENINHLKGMGYSMRAARQALHQAA     |
| Q2KI56 | ELANVQELAEAGANAAYLQLLNLFAYGTYPDY IANKESLPEL  |
| Q9CZ82 | MGDKNRHALVRNCVDIATSENLTDFLMEMGFRMDHEFVAKG    |
| Q80W35 | SPEVIKIKGLRYQRPTLFTNQSVSTQKRQYVNEACTYI       |
| P0DMD0 | YTRLGLTGYLLSRGVKKREINDIETVDDLAIAACDSQRPSVV   |
| P33784 | VSGEVTPEAEKQVQRQLWQVNGYEWTPDYAGLTARPDAFIS    |
| Q17QQ3 | REQMAISGGFIRRVTDARENEMDENLEQVSGIIGNLRHMA     |
| Q810N5 | NRFVELFNLTMKTQILPMNLNEESC IKDFFEQMIRNFKEMQ   |
| Q7Z309 | IHGLSDLQVFPYTLRTRRNSTTIMSRHSLEEGLDMVNRE      |
| P00766 | IQKLIKARVFKNSKYNSLTINNDITLLKLSTAASFQTVSA     |
| Q3UTB7 | GRLWSRPLHYFHLIALALRNSPPCGLSVQQIYSFTREHFP     |
| O75608 | ESGIKQAAENIKALIDQEVKNGIPSNRIILGGFSQGGALS     |
| P19157 | VEDLRGKYVTLIYTYNENGNKYV KALPGHLKPFETLLSQN    |
| Q6NXS1 | EREKKRQFEMRRKLNHYNEGLNIKLARQLISKDLHDDDEDEE   |
| Q9ESJ7 | NAYHMAEVCITTFTEFGKMQNICNFLVEKLDSSVVISPPEF    |
| Q9JKY0 | RLTSLGVIGALVKTDEQEVINFLTTEI IPLCLRIMESGSE    |
| Q9D3G5 | DVHELFLQMAVLVEKQEDTLNVIELNVQKTLDYTGAKAQV     |
| Q3ZCC4 | ERRQAKLLSNSQSLGNDLSVNTPTSTQTSEAGSTGEEQKEE    |
| P97447 | VAYEGQSWHDYCFHCKKCSVNLANKRFVFNHNEQVYCPDCAK   |
| Q08DC7 | YVSILSPKEVSLDSRVREGINKMQEPSAHTFDDAQQLIYT     |
| Q9HB71 | ERSFDLLVKNLNGKSYSMIVNNLLKPI SVEGSSKKVKTDTV   |
| Q9R0Q4 | AKKNVDAILEEYANCKKSQGNVDNKEYAVNEVVGKIKEYFN    |
| P08637 | APRWVFEEDPIHLRCHSWKNTALHKVTYLQNGKGRKYFHH     |
| P01582 | SLNQTIYQDVKHYLSTTWLNDLQEQVKFDYAYSSGGDDS      |
| Q969T7 | DFDMTLRSRFAYNGKRCPPSSYNILDNSKI ISEECRKELTALL |

|        |                                             |
|--------|---------------------------------------------|
| Q99P58 | DLTSQQSFLNVRNWMSQLQANAYCENPDIVLIGNKADLPDQ   |
| Q8WW62 | FGVFEYEGPETDHKQKERKQLNDTLDAIEDGTQKVQNNIFHM  |
| P61328 | MHPDGTIDGTRKDENSDYTLFNLI PVGLRVVAIQGVKASLYV |
| Q9NW97 | AMWNLVPGFSAAEKPTAQGSNKTEVGGGILKSKTFSVAYVL   |
| A5D7F5 | WAESKGFYFETSAQTGEGINEMFQTFYLSIVDLCENGGKR    |
| P23888 | GAGKSTLLRIIGGIDRPDSGNIITEHKISWPVGLAGGFQGS   |
| Q3T169 | VEVRVTPTRTEIIILATRTQNVLGEKGRRIRELTAVVQKRF   |
| Q9D1N9 | VVFHSHQWKVTAEDLILIENELDIKCGERIRLEKVLVGA     |
| Q9DB32 | TLGTLPPETKVFCGHEHTLSNLEFAQKVEPCNEHVQAKLSW   |
| P04925 | KPGGWNTGGSRYPGQGSPPGNRYPPQGGTGWQPHGGGWQP    |
| O00299 | IEEFLEAVLCPFRYPKLAALNPESNTAGLDIFAKFSAYIKN   |
| Q5QGZ9 | YDYWLGLSPEEDSTRGMRVDNIINSSAWVIRNAPDLNMYC    |
| Q8R1J3 | GTGICYRCGSTEHEMSKCRANVDPALGEPFAKFCVCGEMG    |
| A6H7F6 | TWNPFKLQYQLRNVREIRAKNLVEKGILTEKQNFLLFDMT    |
| P17931 | TILGTVKPNANRIALDFQRGNDVAFHFNPRFNENRRVIVC    |
| Q6XJV4 | CHWEQNNVSVVSVCLVSHSTGNQSLSELSQGTMTTPRSLLT   |
| O15194 | TNPKEDEGRPLPGAGEKASQCNVSLKQKRSRSLSSFFCCFR   |
| P55083 | FANLNGFYLGGSHLSYANGINWAQWKGFYYSLKRTEMKIRR   |
| Q9NZQ0 | ALDAWLAEMKQELGPHGNMENIIFVVCANKIDCTKHRCVDE   |
| P13661 | ISKSGHKYVVSALVTGNLGSNLTSSIKAKKNAITILNLTNL   |
| Q8C996 | GLEDRLLESSTRLPHEAQNYRKKALVWSLSIIVTLALA      |
| P28231 | LWHGFTMPRLVQCASIVPCPNTVDCYIARPTKVKVFTYFMV   |
| Q3T095 | GMYLEHYLDSIENLPFELQRNFQLMRDLQRTEDLKAEDIK    |
| P21926 | LWLRFDSTKSI FEQETNNNNSSFYTGVIILIGAGALMLV    |
| A4FV42 | ETAEMGLQRFHKPLATFSFANHTIQIRQDWKQLGVAVVWD    |
| Q96BX8 | EAQINNEDLFPTNVGT PFPKNFLQTVRKLILSRLFRVHVY   |
| P07361 | HGAFMLAFDLKDEKKRGLSLNAKRPDITPELREVFQKAVTH   |
| Q17QL1 | DEYVGLPRNHPEYHSYMWNNFFKHIDIDPNNAHILDGNAT    |
| Q8BJ25 | SYALSDLDTLKKKFLTLKENKRLKRLKAQRLLLRRTCGR     |
| Q9D099 | WLRGLGYTSLTVFLLGFLWLNIDNIFCDSLNRNFRKRVPPVL  |
| Q5T1C6 | RSFSSEEVILKDCSVPNPSWKNDLRLLFDQFMKKCEDGSWK   |
| A6H7F6 | LMEEVLLGLKDEGYTSFWNDCISSGLRGGILIELAMRGR     |
| A6H793 | RIPNGAFQHLHLQRELDLSQNAIETIGPAAFSGLAGGLRLL   |
| Q6ZMS7 | VLGTLLEQYGLLQRRLENVENLLRNRNFWILRLPPGSKGEA   |
| Q96M98 | PVHQPHSLVSEGFTVKAMMKNVVRGPPAAGAFKERPTKPT    |
| P20489 | NHLQMNSTTKWIHNGTVSEVNSSHLVIVSATVQDSGKYICQ   |
| Q9D1R1 | LNHGTLVFGTSSSLSGIMANLVFRNSFKVKYEALKTYASL    |
| Q3ZCK5 | QKDLKFLSEEEYWKLIFFFTNVIQALGEHLKLRQQVIATAT   |
| Q99JL1 | MHNYVPANSLQKLSNWHGLNRKVLNKLNFVSPDDVMRKIA    |
| O95833 | YRESNTAGNDVFHKFSAFIKNFPVAQDEALYQQLRALARL    |
| Q9ULC0 | PVTIPENTSQSQVIGTEGGKNASTSATSRSYSSIIILPVVIA  |

|        |                                              |
|--------|----------------------------------------------|
| Q2MKA7 | RRVPCPEGQKRRKGGQGRRENANRNRLARKESKEAGAGSRRR   |
| P24539 | VMVYGIKKYGPFVADFADKLNQKLAQLEEKQASIQHIQN      |
| P48060 | QFCPKVSGFDALSNGAHFICNYGPGGNYPTWPKRGATCSA     |
| Q9D902 | KKAKVEHGGSSGSKQNSDHNNGSFNLKALSQSSGYKFGVLA    |
| Q6UX98 | PPLGPLARALQLALAAQQLLNLLGNVGLFLRSDPSIRGVML    |
| Q765P1 | VVGGVFFILGGLLGFIPVAVNLHGILRDFYSPLVPDSMKFE    |
| Q96DX5 | LLKHGAQVNGVTADWHTPLFNACVSGSWDCVNLQLHGASV     |
| Q9Z2H6 | FQSNCFPLNDNQTHWESERNCSGMSHSLVINTAEAQNFV      |
| Q9H5J8 | SDSSLFKTQCI PYS PKGEKRNPIRKFVRTPESVHASDSSD   |
| Q3URF8 | LTLDWVANVEGLPEEEYTKQNLKRLVWVPANKQINSFQV FV   |
| P03038 | WHFRNKRALLDALAEAMLAENHHSVPRADDWRSFLIGNA      |
| Q61334 | LITQLAKEIANKGVLKIQAENTNKAARKFMEENEKLLKGLR    |
| Q17RH7 | STSSPSSSSSSSSSSPSSSSSSSSSSSSSSSSSSSSSSSS     |
| Q56K12 | FNVQSRLTEAKHINWRAVLSNSCLYVEIPGGALPEGSKDSF    |
| Q5SSG5 | NGHVHDLQILDFFPISAFVNTLQEWADACCRGLRSVHAYI     |
| A7MBI7 | LQFFGRAFIVWNEFIMKPIRNLMLGSSKEQRILQHVQLHAV    |
| Q9BSU3 | NAQPDDLMMQHCHNLLCLPENYQMKYYLYHGLSWPQLSYIA    |
| P0C7V9 | PYFCRMYKECLSCWLESIPNLGVWPKRIHTTAEKYREYEA     |
| Q29RZ5 | ERGRELPRDALVAQLLAVLSNDEAQLPDPATIEAQGREYVRP   |
| Q92567 | GYPTAYPAAAPAYNPSLYPTNSPSYAPEFQFLHSAYATLLM    |
| P0C672 | FLVLGLLFMGFGAWLLDRNNFLTAFDENNHFIVPISQILI     |
| A5D9C6 | TARSHEFSREPSLSWVWNAVNCSLFSAVREDFKALKPQLWN    |
| Q60931 | QLHTHVNDGTEFGGSIYQKVNERIETSINLAWTAGSNTRF     |
| P51504 | LGTGDGLHSQVLQE QVSTGDNLHECDSQGPSKDTLVREGKT   |
| O70338 | NGRKRARAGIGVYWGPGHPLNVGIRLPGRQTNQRAE IHAAC   |
| Q3MHP2 | YRIVSQKQIADRAAHDESPGNVVDISVPPTDGGKPNKLO      |
| O95750 | SEKHRLPVSLSSAKQRQLYKNRGLPLSHFLPMLPMVPEEP     |
| O95633 | AECCASGNIDTAWSNLTHPGNKINLLGLGLVHCLPCKDSC     |
| Q8BW00 | RHSVGMVVLGQIARRLGAENWTRDSRCAADLALAPLGDQ      |
| Q15116 | AVLQLGWRPGWFLDSPDRFPWPPTFSPALLVVTEGDNATFT    |
| A2ADA5 | RGNPRAVGVLNLFLEAAKRLNSVDPVRF TISSRTDAGVHAL   |
| O70255 | TALCPTEAVEIYTSGALEAVNGTDVRLKCTFSSFAPVGDAL    |
| P37237 | EDRPFQQRSRAGKNFTNPAPNYPEEGSKEQRDSVLPKVTQR    |
| Q9D720 | HCYQVHDRNATVDKLEDFINNINSVLESYIEIKKGVTEDD     |
| Q60931 | HAYTDTGKASGNLETKYKVCNYGLTFTQKWN TDNTLGTEIS   |
| Q5JUR7 | VPNKSLTYGII LTHGASGDMNPLHMLSLASHLASHGFFCLR   |
| O95416 | EVPHTLATGALPYASTLGYQNGAFGLSCLSPQHTHTHPSPT    |
| P41217 | VFWKVPRSGIENSTVTL SHPNGTTSVTSILHIKDPKNQVGK   |
| O43763 | QDALPRPLRPPLPPDPLCLHNSLFFALQNLQFPAEDNKVAS    |
| Q9WVL0 | KYCVGDEVSMADVCLVPQVANAERFKVDLSPYPTISHINKE    |
| O54836 | KMVATRRNMNPFVQSNSSGPFYFNARSRQIRPRDLAMCVTPSGQ |



|        |                                             |
|--------|---------------------------------------------|
| P0C7W6 | AIKKQMIIEEDKFIKEITDFNNDYEITKKRELLMKENVKIE   |
| Q2KI39 | KEGDEPITQWKGTVLDQVPINPSLYLVKYDGDICVYGLELH   |
| P06748 | KMQASIEKGGSLPKVEAKFINYVKNCFRMTDQEAIQDLWQW   |
| P46782 | GRYAAKRFRKAQCPIVERLTNSMMHGRNNGKMLTVRIVK     |
| Q8NGY7 | HTVVGHHFFCDILPVMKLSICINTTINEIINFVVRLFVILVPM |
| Q0VB26 | PILNESQYHDEYTWKLRSKENMVKTGTSRQVWNHKTTHPGQE  |
| Q58DS3 | LGTYGLAEAGGYLHTAEGTLNPFVRSAAAAGALAGVMGAYLGS |
| Q9H8W4 | EGVLTCLCRKKPKARQFFLFNDILVYGNIVIQKKYKQHI     |
| Q9DB29 | NTRWAKIILPRLIRKPGMENFVAVTIFFGANDSSLKDENP    |
| Q3ZBV0 | CACLALNQEQAQLLEVGNNTASARDDIQRNLNCCGFRSF     |
| P81269 | RKILKDLSSDTRGRKGEGENPISISAITSMSVPAPIYQTSS   |
| P60153 | IEPGMPLNHIEYCNHEIMGKNVYKHRVWAEHYFLLMQYDE    |
| Q96C19 | MELKLMMEKLGAPQTHLGLKNMIKEVDEDFDSKLSFREFLL   |
| Q077R2 | IDKEDYALWLNILSKGIKARNTNLVDTYRVHAGSVSANKF    |
| Q9R0M5 | GLKWNLTNDVLFQGTIVSTSNITYDGSGLVTVETDHPLLWMT  |
| P79124 | ISGLERGLGTFDSTIEIIFQNLKTELESRCLNDVVEETQQT   |
| Q9GZN2 | FINARRRLLPDMLRKDGKDPNQFTISRRGGKASDVALPRGS   |
| P00639 | RDSHLVAVGKLLDYLNDQDDPNTYHYVSEPLGRNSYKERYL   |
| Q8N4C7 | REPVAERHLHEIQKLQESINNADNVQKFGQQKSLVAMR      |
| Q8NDY6 | NYILMQAALDEMRRLVAFNLQGGLAAPVNAAPLTPFGQA     |
| Q3URK1 | KGVDPKDVSVPCHDQELSTNKTEDSGVSSQDGERGSAPAN    |
| Q8R0F8 | TQSCMASTKPLSRFEWEGKNIVCVGRNYADHVEMRSTVL     |
| Q8R0A6 | DTKPRKNASSVVPSSVHNSANQRMHSTSSPQAVAKIPKQSP   |
| Q9BQT8 | LEFWRKFGIGLLSGTIASVINIPFDVAKSRIQGPQVPGEI    |
| Q3TT38 | EQDQDRLSQSSVNLSPSSPANNLSVVYTSKGLHGPPYFGQS   |
| Q9Z0S7 | GILVLI PVCWTAHAI IQDFYNPLVAEALKRELGASLYLQWA |
| Q60595 | LSRKLTSDAYKLLKQAEITLSNMFMEQQKFIHETLTLQKNRM  |
| A6QNY1 | TEVPNGSPSPCDIMDDCPDHKNLLNCGPQSCPEGELCCPL    |
| Q9H7E9 | ADSRAPLGDEGGTASKKQKNKKTRNRASVANGGEKASEK     |
| Q32KP7 | VSLFSELEAKQLRKLYKYTKNNQTTKFLMAFCPLDAPSSL    |
| P25393 | ADAFNVSEITIRKRLESENTNFNQILMQLRMSKAALLLEN    |
| Q8K0Z7 | SIRLAVKEGGPNENNSSLANILELCRSKNMPKSTIESALK    |
| Q3S2X8 | KMERFPDLEAEKECRDHEERNEKKAQIQEMKRREKEEMKKK   |
| Q8IUA0 | KKCMDPFQEPCLPVRHGNCNHEAQRWHFDFKNYRCTPFKY    |
| Q8WVE0 | LQEFYAEQKQIEPGEDDKYNIGIIEENWQLSQFWYSQETA    |
| Q8K1A0 | GAGLCVGFDI DEDALEIFKNVVEEFELTNVMDIQCDVYLSL  |
| Q61200 | ESSKDLSISRLLSQTFRGKENDTDLDLRYDTPPEPYSEQDLW  |
| P27144 | AVILGPPGSGKGTVCQRIAQNFGQLHLSGGHFLRENKAST    |
| Q92637 | PTPVWFHVLVFLAVGIMFLVNTVWLWVTIRKELKRRKKWNLE  |
| P56966 | ILRQRTENIDIKKYCVHYLENVGSFEYTRNTLKELESKAYK   |
| Q9ZIS7 | CTAERKARDRLAMERHLGIANEIKDYGYYSVIYRTKLRKFI   |

|        |                                             |
|--------|---------------------------------------------|
| P18021 | VPDLRRKMLLATLWNTGARINEALALTRGDFSLTPPYPFVQ   |
| P35452 | EFLVNEFINRQKRKELSNRLNLSQQVKIWFQNRMRKMKRV    |
| P30279 | SIKPQELLEWELVVLGKLNLAAVTPHDFIEHILRKLFPQQ    |
| Q96HA9 | MEAQMQSEALSLLSNLADLANAVHWLPRGVLWAGRFPPWLV   |
| P07203 | LMTDPKLIWSPVCRNDVAWNFEKFLVGPDPVPLRRYSRRF    |
| P01904 | GALANIAVDKANLDMKERSNNTPDANVAPEVTLSRSFVN     |
| A8E4L3 | EYFYYVDHQQLFLDDSRMKNFTTCFKDPQFLVMFFSRLRP    |
| P53811 | IETWHKPDGLTENVHGLDPNTWKTVEIVHIDIADRSQVEP    |
| Q8K136 | LKTESKTEAPLLTQTRIIITQNALHRAPHYNSCCRRKHREPA  |
| A0PK11 | LVVPHWLSGKILCQTGVDLVNATDRELVKFIGDIYYGLFRG   |
| Q6ZVK1 | NGHDFRGRCLLFTEGMWLSANLTVQERERFTVQEWGPPAAC   |
| Q3T0F5 | KTLDSWRDEFLIQASPRDPENFPFVVLGNKIDLENRQVATK   |
| Q9QZN4 | PVEDWKVFIYILCSLQRNLLRNPCAEBENLSSWRIDSNGGDRW |
| Q60817 | EEVDETGVEVKDIELVMSQANVSRKAVRALKNNSNDIVNA    |
| Q86VZ6 | PVPGCKKRYKNVNGIKYHAKNGHRTQIRVRKPFKCRGKSY    |
| Q93LM8 | AFLRQIGDNVTRLDRWETELNEALPGDARDTTTPASMAATL   |
| P56404 | LGIEIILTMLLVLAVCMGAVNEKTMGPLAPFSIGFSVIVDI   |
| P18468 | RWFRNGKEEKTGIVSTGLVRNGDWTFTQTLVMLETVPQSGEV  |
| Q96MV1 | GVLAYIGNFRLLAELSSPFVNQRWFFEALKYPKFSKAIVIN   |
| Q9ET43 | LSFLCGIASVAGLFAGTLLPNWRKLRLLITFNRNEKNLTIYT  |
| Q8VBV8 | LRGSLHKLKWTFKIYDKDRNGCIDRLELDIVEAIYKLLK     |
| P80217 | LRLSEELLDKLEIFFGKTRNGGGVDVRELLPGSVMLGFA     |
| O54917 | IELVEKSKNHIRWIGSDLNNFGAAPQQKQLQAEISDLSAM    |
| Q5E9M6 | VDHNGTFSVYFRHNSTGQGNVSVSLVPPTKIVEFDLAQQT    |
| O35381 | DLSTIEPLKLENLKSLDLFCNEVTNLNAYRENVFKLLPQV    |
| O14972 | FPLHLKGNKVLYETIYHGVFNIQYTLRCDMKRSLAKDLTK    |
| P62242 | WGSECCTRKTRIIDVVYNASNNELVRTKTLVKNCIVLIDST   |
| Q15475 | ETSYCFKEKSRGVLREWYAHNPYPSPREKRELAEGTLTTT    |
| Q9CQ29 | RLPCSHIFCKKCIFRWLARQNTCPCCRKEVTRRRKMVEVNKL  |
| P19387 | LDVRCNEDQTRHVTSRDLISNSPRVIPVTSRNRDNDPNDYV   |
| Q505G4 | PGASAQMDVVDTLTSLRLTNSALRREASTLRAEKANLTM     |
| Q9BY08 | VCELYGCWMTFLPEWLTRSPNLNTSNWLYCWLYLFFNGVW    |
| Q0IIG7 | AKTSMNVNEIFMAIAKLPKNEPQNPGANSTRGRGVDLTEP    |
| P46638 | DEYDYLKVVVLIGDSGVGKSNLLSRFTRNEFNLESKSTIGV   |
| Q9CZJ0 | VKQDYRFPFSVSKLPEDFDNVQSLLTNSIYLQDSEVTVKG    |
| Q17QN4 | YENEVLQLEEDERFEGRVVWNGSRGTDKLDLSIFITNVTY    |
| P24071 | QLMIIKNSTYREIGRRLKFWNETDPEFVIDHMDANKAGRYQ   |
| P82923 | TVGVVDTNCNPLITYPVPGNDDSPPAVQLFCQLFQTAVTR    |
| Q9D9W1 | GMVQKVDTLSEKHKKSFAFPNIMPRFRSAAKGDSPGPGT     |
| Q86UF1 | MCGQGMQAFDYLEASKVIYTNGCIDKLVNWIHSNLFLLGGV   |
| P14191 | AYFVLPKNAEGTKVGSVKVNASYAGALGRGGVTSADGELM    |

|        |                                            |
|--------|--------------------------------------------|
| Q9NP90 | YRGADCCLLTFVDDRQSFENLGNWQKEFIYYADVKDPEHF   |
| Q56P03 | MFVMNCSINKEEVLYKASENRKKRRVHKKMRSNREDAAEK   |
| Q17R16 | LAFVLGNRQTDLLQEELKQENKDFVGSTVSSVLRPGGDVSG  |
| P08883 | KLESKAKRTKAVRPLKLRPNARVKPGHVCSVAGWGRTSIN   |
| Q01362 | GAGEELKGNKVPEDRVYEELNIYSATYSELEDPGEMSPPID  |
| Q29S11 | TKKDDSHSAEDSEDEKEDHKNVRQQRQAASKAASKQREMLM  |
| Q6PHN9 | LLIIGDSGVGKSSLLRFADNTFSGSYITTIGVDFKIRTV    |
| Q9NZD2 | RFIQVFLQSIDGERDENHPNLRVFNATKAYEMALKKYHW    |
| Q7TSP5 | APRWFPPQPTVAWASQVDQGANFSEVSNFSFELNSENVTMKV |
| Q9BSM1 | LNLCLERLSSGKDKNKSVLQNKYVRCVRAEVRHLRRLVCH   |
| Q9H2W2 | RERLAALTLLPESRIQVWFQNRRAKSRQSGKSFQPLARPE   |
| Q8WU03 | LYKSLEKSIPESIKVYGAI FNKDKNPFNMEVLVDAPDYQ   |
| P54368 | LHSRGGSSSESRVSLHCCSNPGGPRWCSDAPHPLKIPG     |
| A6NJ46 | GAGAGAGDRAPSENEDEYNKPLDPDSDEKIRLLLRKHR     |
| P43275 | GVSLAALKKSLAAAGYDVEKNNSRIKLGKLSLVNKGTLVQT  |
| O55135 | IPVVHASIAGCRIIGRMCVGNRHGLLVNNTDQELQHIRN    |
| P53026 | CDERKAVIDPHMDIEALKKLNKKNKLVKKLAKKYDAFLASE  |
| Q9QZE7 | EAVSFQHFIKTRSLISMEEINKQLTFTAEDSGKESKTPPAE  |
| P23560 | KCNPMGYTKEGCRGIDKRHWNSQCRTTQSYVRALTMDSKRR  |
| Q9JL16 | LPVSAEQLAGPLLCGRQCQGHNGALQNLATQSPARAALFWD  |
| P07738 | NERIAPEVLRGKTILISAHGNSSRALLKHLEGISDEDIINI  |
| Q9D8M4 | ELILKRGQAKINNKTVPLTDNTVIEEHLGRFGVICLEDLIH  |
| Q2TJ95 | SSSSDSKGLESSIETPDQENKERQQQKRRARDKQKSVS     |
| P11456 | VCREAGNHSSGAGLVQINKSNGKETVVGRFNETQIFNGSNW  |
| P01131 | IVLPIALLILLAFGTFLWKNWRLKSINSINFDPVYQKTT    |
| P13284 | YKTGNLYLRGPLKKSNAPLVNVTLTYEALCGGCRAFLIREL  |
| Q2YDL1 | FQILHHTCQRYLTDKRPFINCQSKIMGGNSILHSAADSVT   |
| Q29RK9 | SLNSGVDLKAAVQLPSGEDQNDWVAVHVDFNINLIYGT     |
| P11843 | IGRQWEICDDYPSLQAMGWPNNEVGSMIQCGAWVCYQYPG   |
| Q32L00 | WHPVLLMLKNQIEENTGHSFNLLCNLYRNEKDSVDWHSDD   |
| Q5TGL8 | GPLRQGLVAIKEAHDIETRLNEVEKLLKTIISMPCYRSSE   |
| Q53RY4 | SVSGLLSVSGLVALLASRNLLRPPLHWVLLALALVNL      |
| Q9D1F4 | SVPVWAFKEKRTEARSSDEENGPPSSPDLRIAASMRALVL   |
| Q14331 | GPREQWEPVFQNGKMALLASNSCFIRCNEAGDIEAKSKTAG  |
| Q9DCK3 | VGLTNAWSIIQTDFRCCGVSNYTDWFEVYNATRVDPSCCLE  |
| P41439 | RWWEDCRTSYTCKSNWHKGNWNTSGINECPAGALCSTFESY  |
| P17981 | VAYTGNIHRSLEATREFKINPGNFHYKAFHYLTRALQLL    |
| P20033 | CKTRTVIYEIPRSQVDPTSANFLIWPCCVEVKRCTGCCNTS  |
| Q99623 | AQNISKTIATSQNRIYLTADNLVNLQDESFTRGSDSLIKG   |
| Q96KN8 | AVVKYSRLEDVLHGCSWKVNNKLDGTYLPLPVDKIQRKTK   |
| Q9H400 | DLAYQTLPLRALDVGSPLENVYESIRELGDPAGRSSTCGA   |

|        |                                            |
|--------|--------------------------------------------|
| P53811 | SKNETGGGEGIEVLKNEPYENDGEKQYTHKIYHLKSKVPA   |
| P81126 | KLHMQLQSKHDSATSFVDAGNAYKKADPQEAINCLNAAIDI  |
| P04390 | VYTRVATRKSLLKTYNINELNEIPKPYKGVKVFLODKWVIA  |
| Q96FV3 | VVGGVMSVLGFAGCIGALRENTFLKFFSVFLGLIFFLELA   |
| P23185 | METGSMYQNAVLVADQIGLKNRVWAGYTDYSYVAKTMNLDQR |
| Q5T681 | HFSRLSEEKALDNNASASGNATQTESGSEVSSTVHIETF    |
| O95297 | AGDLDDKASINIENMQFIHNGTYICDVKNPPDIVVQPGHI   |
| Q9ERI2 | QSFLNVRNWSQLQMHAYCENPDIVLCGNKSDLEDQRAVKE   |
| Q16740 | IAQLLFLQSESNKKPIHMYINSPGGVVTAGLAIYDTMQYIL  |
| P53519 | SIRGCIKLIYRPASVPSPVFNIVEKLVKWHKNGKYLVLKNN  |
| Q9JM71 | HPDYNMSLLNDHIPHPEDKSNLMLLRLSKPADITDAVKPI   |
| A6NJ46 | RARLAYS LGMTESQVQVWFQNRRTKWRKKSALPSSSTPRA  |
| Q8WU03 | EIPFYFHVADNNEKSLQALNNGFKICPCGWHQWKCTPKKY   |
| P43464 | GIIVADADDVLDTFKSIDHNDDSRITSDLIYLISKIENNR   |
| Q148M8 | VPGIVYLGHIPPRFRPLHVRNLLSAYGEVGRVFFQAEDGFV  |
| P62079 | EYWQCCGAFGADDWNLNIYFNCTDSNASRERCGVFFSCTK   |
| P00766 | RYTNANTPDRLQOASLPLLSNTNCKKYWGTKIKDAMICAGA  |
| O95156 | VHATEGLDWEKDPAGTLVGNVVHSRIISPLRFLVKQSFVP   |
| P40261 | KEPEAFDWSVVVYVCDLEGNRVKGPEKEELRQAVKQVLK    |
| Q8TAA3 | VTVEYITRFIATLKQKYTQSNRRPFGISALIVGFDDGIS    |
| P06344 | RWFRNGQEETVGVSTQLIRNGDWFQVLVLEMPRRGEV      |
| Q3ZCD0 | ETLNCCGSNTLMTLTTSVLKNSLCPSSGNVITNLFKEDCHG  |
| P17931 | PLPGGVVPRMLITILGTVKPNANRIALDFQRGNDVAFHFNP  |
| Q99990 | PNQWRYSSPWTKPQPEVPVTNRAANCNLHVPGPMAVNQFSP  |
| P50538 | EHGYASMLPYSKDRDAFKRRNKPKKNSTSSRSTHNEMEKNR  |
| Q92520 | VFCGKGKIKTKSPFEQHIKNNKDTNKYEGWPEVVEMEGCIP  |
| F7BWT7 | MELIGGIVALIFRNQTIIDFLNDNIRRGIEINYDDLDKFNIM |
| P41976 | LQPALKFNGGGHINHSIFWTNLSPNGGEPQGELEIAIKRD   |
| P05839 | FFLFCALGFTEMLCSDRYFGNKVEDYVVTFGSWFLLAPGI   |
| Q9UMY1 | SQTNIKKSFGKVEVNLQKKNEDCEKGNDSKKVKVQKVQSV   |
| Q924T2 | LLFGPSVRLPDLIIFLHTLNNVFEPHVAVRDAAKMNIPTVG  |
| O60637 | VFVTEVVVVVLGYVYRAKVENEVDRSIQKVYKTYNGTNFDA  |
| Q08DZ3 | KTDFRGMGILGLINLVYFSENYTSEAHQILSRSNHPKLGYS  |
| Q3UP87 | VPRRQAGICFGDGGPLVCNNLVQGIDSFIRGGCGSGLYPD   |
| Q9ULC3 | KIGVFNTSGGSHSGQNSGTLNGGDVINLRPNKQRTKKNRNP  |
| O77512 | KTVVIRPQEQEMADDFDHYTNTYQIYSKDLNQCESLATSD   |
| P41217 | LSHPNGTTSVTSILHIKDPKNQVGKEVICQVLHLGTVTDK   |
| P07903 | LRYHNLHPDYIHERLQSLGKNFALRVLLVQVDVKDPQQALK  |
| Q3ZBP0 | GKVKVDNFDIEDLDLDEEINPQLSKDVLVLLPGQVEQEVSL  |
| O35526 | PDEKTKEELEELMSDIKKTANKVRSKLSIEQSIEQEEGLN   |
| P14148 | NKASINMLRIVEPYIAWGYPNLKS VNELIYKRGYKINKKR  |

|        |                                             |
|--------|---------------------------------------------|
| Q14406 | EDGSHLTGQTLKQTYSKFDTNSHNDALLKNYGLLHCFRKD    |
| Q43930 | RFLYMLMEYVPGGELFSYLNRNGHFSSTGLFYSAEIIICAI   |
| QOVBU9 | RTDKTEIKEAFLAVSLALALNGVCTNTIKLIVGRPRPDDFFY  |
| P05820 | NITLKTEGTLTISANGSWTYNGVVRSYDDKYDFNASTHRGI   |
| Q6P6J4 | VEVVRLQLAHGSLMMNPPTNTHWYHSLPIRKRVLAPRVNL    |
| P04224 | AVDKANLDMKERSNNTPDANVAPEVTVLSRSPVNLGEPNI    |
| Q3ZBE1 | DSFNEMNSRRRKAQFFLGTTNKRAKTVVLHIDGLDDTSRRN   |
| Q8VC88 | SGQIPGMQMQMPGAGPNMFGGYPGLGYSDSYSFAD         |
| Q3SYV5 | AGVLGFVFSKVRGVSEIINNAIVHYRDDLDLQNLIDFGQ     |
| Q6NXT1 | DPCAADDKGRALHFASCNGNDQIVQLLLDHGADPNQRDGL    |
| Q32L31 | RPPSGFFLFCSEFRPKIKSANPGISIGDVAKKLGEMWNLS    |
| P06345 | RLEQPNVVISLSRTEALNHNHTLVCSVDFYPAKIKVRWFR    |
| P20719 | SYFVNSFCGRYPNGPDYQLHNYGDHSSVSEQFRDSASMHSG   |
| Q9H008 | SNPNCVVIADAGESFSYQNMNNAFQVLMLEKPVLSLKGK     |
| P62491 | YRIVSQQMSDRRENDMSFSNNVVP IHVPPTTENKPKVQCC   |
| P45379 | EEEEENRRKAEDARKKKALSMMHFGGYIQKQAQTERKSGK    |
| Q3LUH2 | QQLNKTFSYFLGLSDPQNGNWQWIDQTPYKENVRFWHQNE    |
| Q9GZU8 | SQENKKEVEKKLTVKPIETKNKFSQAKLLAGAVKHKSSESG   |
| P05538 | NNYKDFLEQERAAVDKVRHNYEAE LR TTLQRQVEPTVTIS  |
| Q9WU03 | WWYNITDGSCQPFVYGGCEGNGNNYQSKEECLDKCAGVTEN   |
| P13972 | VDVFSIPACVRNTNGDLSATNEKFSKEFIGSLDIKEWFYSL   |
| Q32KY9 | EFAMMDRELNHYLKAVQSTINHVKEESEKIPDLKLLVEKK    |
| Q96DX5 | HEAARRGHVECVNSLIAYGGNIDHKISHLGTPLYLACENQQ   |
| P06717 | GGLMPRGHNEYFDRGTQMNINLYDHARGTQTGFVRYDDGYV   |
| Q6P3D7 | ANYYGMSPTENPLYDWRGVTVNGSADLYLEGGFHQSVQNTAE  |
| P01920 | NSQKEVLERTRAE LDTVCRHNYQLELR TTLQRQVEPTVTIS |
| Q14002 | TLVLLSATKNDIGPYECEIQNPFVGASRSDPVTLNVRYESVQ  |
| Q8CD60 | DSVDGPEAPRPGTGPDYQLMNGGLPIPNGPRVETPDSSSEE   |
| P41439 | NACCTASTSQELHKDTSRLYNFNWDHCGKMEPTCKRHF IQD  |
| Q8N6D2 | DNNILVNLTGCGGKGGKCLPENPTE LLLTPKRLASLVSPSHT |
| Q9D287 | WQECVNNSMAQLEHQAVRIENLELMSQHGCNAWKVYNENLV   |
| Q9BQD7 | AGSVCYRRKDLWKVSLRDCRNVSVFLAPSVLPLEDKLRTE    |
| Q6UWN0 | KFQAGFLNTTFLLMGCAREHNQLLADFHHSIKVTEVLNI     |
| Q9QY33 | VFVTEVVVVVLGYVYRAKVENEVDRSIQKVYKTYNGTNSDA   |
| Q9XSK0 | LFAKTQYPDVYAREEVALKINLPESRVQVWFKNRAKCRQQ    |
| Q8C5C9 | NSAEDPSPAQVGKESPWSPCNKSVVGKCKLWMVIVTIFLCF   |
| Q3SZX8 | FHRQKDVKIVTVEKKVNEILNRLEKTKMERFPDLEAEKECR   |
| Q9HBJ8 | WLLFFLVTAIHAELCQPGAENAFKVRLSIRTALGDKAYAWD   |
| A4FV54 | AMGIMLVYDITNEKSF DNIRNWRNIEEHASADVEKMILGN   |
| A5PJK7 | ENVLGGHAPSPTAVAAAENGNREPRPSLFFQCPKDDAGSWG   |
| Q6UXN2 | SGFYWCGIYNASENIITVLRNISLVVSPAPTTSPMWTLPWL   |

|        |                                             |
|--------|---------------------------------------------|
| P13949 | YRNSPVPVCRNKNRKILYANGAFIELFSREDKPLSGESYI    |
| Q9H446 | AEEAEKQLFHGTPVTIENFLNWKAKFDAELLEIKKKRMKEE   |
| Q148K5 | VLLLARVLRGHPPLLLDVVRNACDLFIPLDKLGLWRCGFGI   |
| Q01081 | EVFTEEMEEKYGEVEEMNVCDNLGDHLVGNVYVKFRREEDAE  |
| Q9JL62 | AALYAAPYKSDFLKALSKGQNVTEEECLEKIRLFLVNYTAT   |
| P07738 | NRFCSWVDQKLNSEGMEEARNCGQLKALNFEFDLVFTSVL    |
| Q08DH5 | ESAHKSQRALDDCKMLVQEFNTQVALYRELVISIGDVSVSC   |
| Q9BT09 | TETICKRLLDYSLHKERTGSNRFKGMSETFETLHNLVHKG    |
| Q9H7V2 | QKSMLVHSKI SDAGKRNLINTRNLMAESRDGLVSVYPAPQ   |
| Q5EA90 | LILPPNPAFGSKAASYSSMGNSRPFSCVPCERAAGAGFVT    |
| Q9CPX5 | DGTYLPLPVDKIMQRTKNMINKIVQYSLIEGNCEHFVNDLR   |
| Q96ET8 | ALYWKAPARLSSPPLRAAPGNCQQMAPARLFLSLRLWAWRG   |
| P07743 | QNLNLDVELLQQATSWPLAKNSILETLNTADLGNLKSFTSL   |
| Q8NGA4 | HLKFRTRTKWNGCMQCYLQFNLENETAQMWTTQEVFGRQMAV  |
| Q9CR57 | KFPHSARQKYVRKAWEKADINTKWAATRWAKKIDARERKAK   |
| Q3ZBP0 | DEEFDYDAVVLTPKFTPAEMNAIKELSKQTKSADLEDPHD    |
| Q8R1J3 | DGGSCKLCGSVEHFKKDCRENQNSDRIITVGRWAKGMSADY   |
| Q32PI9 | TMILAVIYRRRNSKRDIYACNTSENVSPVKQVSRKSPSDE    |
| Q8N9E0 | KQLENKKTGSKALAEFEEKMNENWKKEKSREKLLSGNES     |
| Q3SZ16 | PPPLCEAAWAQECLQQGCKLNRLNSVVEYARACLQVAQDC    |
| O88396 | LEKEVQDLTLRYQRAVADCENIRRRTQRCVEDAKIFGIQSF   |
| P46412 | ENSEILPSLKYVRPGGGFVVPNFQLFEKGDVNGEKEQKFYTF  |
| Q9CZQ6 | PWCDVKCSVDEITILHLNNINKTMTSGDPGKMANATGKCLT   |
| Q9NWU2 | GQIQEAIALINSLHPELLDTNRYLYFHLQQQHLELIRQRE    |
| Q6GTx8 | PDTEPGSSAGPTQRPDSNSHNEHAPASQGLKAEHLYILIGV   |
| P62609 | KAGNKSLENTMVPQKQKVTVNIIPGGYTGDDITYKTINDYGA  |
| Q5E9C8 | TKPVDCVPTRADRISLLERFNFHWRDWTYRDAVTPQERYSE   |
| Q53TN4 | VAAILAIISVVAVFENHNVNNIANMYSLHSWGLIAVICYL    |
| Q9Y277 | QKVNEKIETSINLAWTAGSNNTFRGIAAKYMLDCRTSLSAK   |
| Q0VC58 | GGGILSCVLLAEPPRLFLANN'TNILLASSIWIYIAFFCPCDL |
| Q8WY22 | VVLFMSMVCVYILHKYEGEPENAVLPLCFVVAVYFMTGPMGF  |
| Q2KIA1 | NFSKPEAAARARIELHETDFNGRKLKLYFAQVQMSGETRDK   |
| Q3T040 | RKQFEKYHAASAEEQATVERNPHYTFHQALKNCEPVIGLVP   |
| Q6P047 | VKEVFQLQRPQGRERLRLLNWEEFDEQRDSRRSILLDTLY    |
| P58499 | SLLFMVTYDDGSTRLNNDKNAIEALGSKEIRNMKFRSSWV    |
| Q14618 | LHVHQYGDLTNNCNSCGNHFPDGAHGGPQDSDRHRGDLG     |
| Q00169 | SVAEASKNETGGGEGVEVLVNEPYEKDGEKQYTHKIYHLQ    |
| Q9EQ00 | HKQCSHKQYVELADLEKKWKNLCLPVEKLRITILELDPCEDK  |
| A0JN86 | TMEFIYMRWRLRGENFRCLNCSASQVCSQDGLYQSYPMV     |
| Q0VC58 | GWIVMIAVGWARGAGGSIITNFEQLVKGCWKPEAEWLKMS    |
| O00560 | EVILCKDQDGKIGLRLKSIDNGIFVQLVQANSASPASLVGLRF |

|        |                                           |
|--------|-------------------------------------------|
| P15173 | KRRLKVVNEAFEALKRSTLLNPNQRLPKVEILRSAIQYIER |
| Q9NX20 | AVSRGTLEKMRKDQEERERNQNPWTFERIATANMLGIRKV  |
| Q5U4E0 | LAIIGILNALILSFLAFVLGNRQTDLLQEELKQENKDFVGT |
| Q9CZD0 | VTEKFPEVHMEVIADYEVHPNRRPKILAQTAHVAGAAYYY  |
| Q2KHU3 | VTINEETALAEVNLKSKSLNIRTHPVATSFVFDLTLIV    |
| Q9BZD6 | AGVFLVIFGLLGYLCITKCNRLQHPCSSAVYERGRHTPSI  |
| Q80SV1 | AGCALYPLGWNSPEVMQTCGNVSNQFLGTCLRGWAYYCAG  |
| P62593 | HLTDGMTVRELCSAAITMSDNTAANLLTTIGGPKELTAFL  |
| P09024 | AGQSAAGVYAAGYGLEPSSFNMHCAFPEQLNSGVCPCGPAK |
| P00918 | LSVSYDQATSLRILNNGHAFNVEFDDSDKAVLKGGLDGT   |
| Q9D0L6 | AQNHSGPAMPTLECCHEMCMNYRGLHDVLSPSKSEASQGN  |
| O54907 | QDGAQAGVDGTVSGWEETKINSSSPLRYDRQIGEFTVIRAG |
| Q8WV22 | KALELIDSETGFASSTNILNLVDQLKGGKMRKKEAEQVLQ  |
| Q7YRZ7 | RRYMALIKGLKLCAGALIKENWVLTAAHCDLKGNPQVILGA |
| Q0V7M7 | HLKENIPPHLPQVTVTQNFVNGSDLDPEEPVKVEEPAPTKK |
| P53516 | ATETNARVFSHLGATRUVYNPASSGETLTVINDQDYPMLV  |
| P07516 | LKAVQRIAESHLQSI SNLGENQASEEDELGELRELGYPRE |
| P13726 | ARTLLLGWVFAQVAGASGTTNTVAAYNLTKWSTNFKTILEW |
| P50591 | KGFYYIYSQTYFRFQEEIKENTKNDKQMVQYIYKYTSYPDP |
| Q3TT38 | EAWPPGVCLKYVGGDQFGHVNMMVRSLEPQEIADVSVQMC  |
| Q3SZW3 | KSCQKPVDKYIEYDPVILINAILCKAQAYRHILFNTKINM  |
| Q9D6D8 | KKRELKGETWVYSSVVMCFVNDQLLGNADFLLKKAQKVWDV |
| O54901 | SSITFWNTTLEDEGCYMLFNFTFGSQKVSCTACTLYVQPI  |
| O75845 | TLSYYFVFDHALMKHPQLKNQVRREIKFTVQALPWISILT  |
| Q9Y255 | INHARLMVVEERCVCVNSDMSGWTEIRREAWSSSLFGVS   |
| P00757 | SGWGSTTPIKFKYPDDLQCVNLKLPNEDCDKAHEMKVTD   |
| Q4U5R3 | DEKKKGEDEBKPPCGPVCNEKIVVLLQRVKPEIKDVIEK   |
| Q9H8U3 | KCFADFQKQPDDDSAPSTSNQSDLFSEETSDNNNTSIT    |
| Q9D172 | VPQMHVIDHTKGEPSERESRNVLAESARIARGKITSLAQLN |
| Q8N1Q1 | AAHEPDGLAVLGVFLQIGEPNSQLKITDLDLSIKEKGKQT  |
| Q2TBT8 | GAYHRCSLGCGATLGPVERANHCYRELREAWCQRQQRST   |
| O94903 | GHQRTFGENYVQELLEKASNPKILSLCPEIKWHFIGHLQK  |
| Q6PFX2 | LTGAKSSTRDKVVKPAMNQNEVQEIIGVTKQVFPADDVS   |
| P63101 | TELRDICNDVLSLLEKFLIPNASQPESKVFLKMKGDYRY   |
| A6H789 | TLQTLDSLSDNRISVHKNAFNLLKARARIANNPWCDCTLQ  |
| P46412 | IDGEEYIPFKQYAGKYILFVNVASYUGLTDQYLELNALQEE |
| Q47036 | ITTRPRRREPLWAVTDETMRNWLKQAVRRAEADGVHFSISV |
| Q9DCX7 | SGAAAAAPSPQYTYIYPQDNAAFVESEGFSPFVGTGYDRP  |
| Q8VCZ2 | GLWWSVKYFLKYFHHKGLKNNRLSRQERIEIEGAVKTLF   |
| A6NH52 | FSLKLLKWLALVVAGISLQANLYGYILCKMGGNSDIGKVT  |
| P97382 | PGLQGSLDRLQLEYVDIVFANRSDPNPMEIEVRAMTYVIN  |

|        |                                             |
|--------|---------------------------------------------|
| Q9D5H4 | ETHYLHEQVKS IKELGDHVHNLVMTGAPAAGLAEYLFDKHT  |
| Q62283 | FVFRHEIKDTFLRTYTDAMQNYNGNDERSRAVDHVQRSLSC   |
| Q13868 | KRQKTHFHDLPCGASVILGNNGFIWIYPTPEHKKEEAGGFI   |
| Q16623 | IRKTQHSTLSRKFVEVMSEYNATQSDYRERCKGRIQRQLEI   |
| Q17QW4 | RRFVEACRAREAAFDAEYQRNPQRMDFDILTFSITLTASEI   |
| Q9CWU6 | VCLGSEQTVGADTAQNRKYHNTSKLLTTQDFPQPVEEKVGP   |
| Q3TZ65 | PRPLEDTPGPGTHNPEQVTVNRARAPAYTMGIRHSKRASTM   |
| Q9Y399 | ALNFTAHMAYRKGII LFI SRNRQFSYLIENMARDCEGYAHT |
| P41047 | PSQPLPLPPLTFLKPKDHNTNLWLPVVFMMVLVALVGMGLG   |
| P49888 | PFLECRKENLMNGVKQLDEMNSPRIVKTHLPELLPASFWE    |
| Q9NZQ0 | WAESKGFLYFETSAQTGEGINEMFTFYISIVDLCENGGKR    |
| Q9DB26 | APSDSGPGTSFLGSDPAWASNLVPLPVRGGGLVIHGEVV     |
| P47753 | DEEKVRIAAKFITHAPPGFNEVFNDVRLNNDNLLREGA      |
| P11842 | GRKGELSDDYPSLQAMGWDGNEVGSFHVHSGAWVCSQFFGY   |
| Q9BQ50 | VRTLQAFLSRQAGPICLVAHNGFDYDFPLLCAELRRLGARL   |
| Q6F5E0 | LLVRWGRPRGLQCDLLLFSTNAHGRAFFAAAFHRVGPPLLI   |
| Q6UWM5 | PPYVRGESCSLCSKEEKCVKNLCRTPQLIIPNQNPFLKPTG   |
| Q3SZD1 | FTSCLKETLSGLAKNATDLQNSGMSEELTKAMEGLGMDEG    |
| Q8WXX5 | VDSLKAAIQSRQKDRQKEMDNFLAQMEAKYCKSSKGGGKKS   |
| O88958 | GSSLVSRTRVKTLAMDTILANARFFDGLAKVPTMALTVGV    |
| Q3SZ18 | QSTGDIKVIIGDDLSTLTGKNVLIVEDIIDTGKTMQTLAL    |
| Q7L0L9 | CSRQALGHLSGRGPSPRSEMNSSVGDVGCGCSLWDDPARF    |
| Q60590 | YRQAIQTMQSEFFYLTTNLINDTIELRESQTIQDQCVYNST   |
| Q16594 | LIGSKNILITTNMSSQNTANESSNALKRKREDDDDDDDD     |
| Q9BQ15 | ASQPTTGPSAASPASENQNGLSAPPGPGGPHPPHTPSH      |
| P12319 | NFFEVSSTKWFHNGSLSEETNSSLNIVNAKFEDSGEYKQCH   |
| Q9ES30 | YGFRGYQGPPGPPGPIPGNHGNGNGGATGHEGAKGEKG      |
| Q32KX8 | DVDQRCLDSILATTQAHGLPNVKAPMYLDVTWDWKQWGGIL   |
| Q1LZ83 | GDICKSINNDTTYCVKCLPRNPERKEIIGNGEQQYVYVKDG   |
| Q14893 | LSIVSRMNQATVTSVLEYLSNWFGERDFTPELGRWLYALLA   |
| Q9NS28 | HGSGKEETSKEAKIRAKEKRNRLSLLVQKPEFHEDTRSSRS   |
| Q32KY3 | KKSNNKTGDEEVNQEFINMNECDAHAFDDEWQNEILKYQP    |
| Q01081 | GDRCSRLHNKPTFSQTIALLNIRNPQNSSQSADGLRCAVS    |
| Q91WD9 | KNKDGRLDLNDLARI LALQENFLLQFKMDASSTEERKRDFE  |
| O14972 | NVKERALLPKFLLRGHLNSTNCVITQPLTGEVLVESSEAAI   |
| Q3MQ24 | DHKQLWMGLQNDRFQFWAINRKLMEYPAEENGFRYIPFRI    |
| Q8BNX1 | LSQHTRGRGYWGLRAVRHLNKIQGYRWVDGASLNF SHWNS   |
| P09016 | SGTALKQPAVVYPWMKKVHVNSVNPNTYTGGEPKRSRTAYTR  |
| Q6PHZ8 | VLKEDAPRQHVETFFQKMDKNKDGVVTTIDEFIESCQKDENI  |
| Q96BH3 | DTRISALVPGFPCHFPHYKNKNYFNCTNEGSKENLVWCAT    |
| Q9BZM6 | HGRGSWQFLFNGQKFLFDSNNRKWTALHPGAKKMTKEWEK    |



|        |                                             |
|--------|---------------------------------------------|
| Q9NRX1 | VTRTRIVLADVHVHILGSFQNIKMARTAICNLILGNPPSKV   |
| Q5JUQ0 | QEGKIQAISSDSGVDVNYPWYGNTECTIVGPTKRDSKFIIS   |
| P20934 | AEIKSQGETFKKEVCEENTSNTAMLI CLIVIAVFLICTFL   |
| Q8K3I6 | AESRLPGVNLDDLPLGYHLPNVSLTFQAWHHLSDSERLCFL   |
| Q9D0V7 | QDMPFIHQSSSELGDLDTWQENSNAWEEEDAAWQAEEVLRO   |
| P11911 | FFPEVKNHRGLYWCQVIENNILKRSCGTYLRVRNPVPRPF    |
| Q8TCF1 | CHRWSIGKAIDFAASLARLKNNDNNKFTAKKLRRLCHITSGEA |
| P19075 | NGKQVYKETCISFIKDFLAKNLIIVIGISFGLAVIEILGLV   |
| Q5SRD1 | SHADLAGVPLTGMNPLSPYLVNVDPRYLVQDTDEFILPTGAN  |
| P46952 | PVCNKLHQEQQLKVMFIGGPNTRKDYHIEEGEEVFYQLEGD   |
| Q8CCA0 | NKDQWCNVLEFSRTISLDLSNYDEDEGAWPVLLEDFVEWYKD  |
| Q05B78 | FYDRQLKLLLSGATFLVTFENSEKPDVMCRLSSNQRFLLL    |
| Q96EU6 | QRQLALAEKFKELKRSKKLENFLSRKRRRNAGKDRRHPLPS   |
| P20336 | TITTAAYRGA MGFI LMYDITNEESFNAVQDWSTQIKTYSWD |
| Q92688 | RIHLELRNRTPAAVRELVLDNCKSNKDGIEGLTAEFVNLEF   |
| Q9D968 | ANAHIDYTSRPAIVFRISAKNEKGYGPAQTQIRWLQGNKKA   |
| Q9BZE7 | TYTPGTCELLRVMKESKLTNIQQRHIMDIMKRGDALPLQC    |
| Q8R3G9 | PEYNRILNETLYENAKLLSDNTDEAKDFQKAMIVFQSEFKC   |
| Q9BPZ2 | KEGDEPITQWKGTVDQVPIINPSLYLVKYDGDICVYGLELH   |
| P01909 | QFRFDPQFALTNIAVLKHNLSLIKRSNSTAATNEVPEVTV    |
| Q3TQI7 | VNYVQHNRFYHEELNAPIRRNKEEPKARPLRVGDTEKPEPE   |
| P10144 | GDPEIKKTSFKGDSGGPLVCNKVAQGVISYGRNNGMPPRAC   |
| Q3S2R5 | AFSFGSPYGTTLKYFQDQRNAALGRSSTAFSRGGHFPTIF    |
| Q9BW66 | KIQVKMEKLSSTTKGICELENYHYGEESKRPLFHTWPTTH    |
| Q91V41 | YYRGAAGALMVYDITRRSTYNHLSWLT DARNLTPNPTVII   |
| P01882 | FFPENIHLMWLVHVKMSTNFVTANPTAQPGGTFQTSVSL     |
| Q58DI5 | VLVVLWAFILGLSRVMLGRHNVTDVAFGFFLGYMQYSIVDY   |
| A6NIH7 | CEHIYEFQLSSEDEVIRLMIENPYETRSDFSFYVDNKLIMHN  |
| Q16611 | HCIARWIAQRGGWVAALNLGNGPILNVLVVLGVVLLGQFVV   |
| P78345 | KQQVSGWTPAHVRKQLAIGVNEVTRALERRELLLVLVCKSV   |
| Q9CPQ5 | LTSEVEEEEQEVKQVFHIDSNKVLALPELSQKSLKAPILQE   |
| P31213 | NRGRPYPAIILIRGTAFACTGNGVLQGYLIYCAEYPDGWYT   |
| O43543 | SVNLQESTLRKCSQCLEKLVNDYRLVLFATTQTIMQKASSS   |
| O09131 | PFAQRTLMVLKAKGIRHEVININLKNKPEWFFKPNPLGLVP   |
| P21266 | PDYDRSQWLDVKFKLDLDFPNLPYLLDGKNKITQSNAILRY   |
| Q8BG94 | KWKQNASTLAQWAMGQTLMVNQLIDMEWRFGVTSGSSELEK   |
| Q1WG82 | LEISSATSPASLQRRPRKQLNPRMGIEKVDPRFKGVTLFQ    |
| Q2YDG2 | EVYFSGKKRLLPRPTDMSFYNWDSHIAIWNSTPNYQVIADN   |
| Q865R3 | SDDQWGEYSCVFLPEPMGTANIQLHGPPRVKAVKSSEHINE   |
| A0JNC4 | TWWFGVKFAAGGLGTFHAFLN TAVHVVMYSYGLCALGPDY   |
| Q9D1H0 | FGSPARTRPAQPDFDPPWVQNCNRSRGVGGPPKGLAKRD     |

|        |                                               |
|--------|-----------------------------------------------|
| Q8C5C9 | REELELSMLDGPQEELTPLNNDLRIQPNSAEDPSPAQVGKE     |
| Q9CRA7 | TLCKCHYIEDNCLQRLSQQLENLRKSLLELEI IACGNVTDNG   |
| P00915 | GSEHTVDGVKYS AELHVAHWNSAKYSSSLAEAAASKADGLAVI  |
| Q8N7B6 | NRATGNYDQRTSSSTQLKHRNAVQGSKSSLSSTSSPESARKL    |
| Q6QLQ4 | SWYGSKRHCSQLGAHLLKIDNSKEFEFIESQTSSHRINAFW     |
| P97766 | QLIGLGSYQSEGDGAREVSNILSPVIPGTTLDRTLSN SSR     |
| Q495A1 | TTAQVTQVNWEQQDQLLAICNADLGWHISPSFKDRVAPGPG     |
| O55183 | VVRCLNSALQVCGGAFACLENSTCDTDGMYDICKSFLYSAA     |
| Q8TCZ2 | RAPANTLGNDFDLADALDDRDRDDGRKRPIAGGGGFSDDK      |
| P41732 | DESRVAVDQVRSLSCCGVQNYTNWSTSPYFLEHGIPPSCC      |
| Q9Y2Y6 | SELELDDVVITNPHIEAI LENEWDIEDASGLMSHCIAILKI    |
| P26892 | LLEYQIYLDYLNQNEYEGNQENVRDLRKNIRTLIQILKQKIA    |
| P19397 | DNSTKAAWDSIQSFLQCCGINGTSDWTS GPPASCPSDRKVE    |
| Q6P5X7 | NAESVITSSSSHIISQPPGGNSHLSLSLQSLTASERFQENS     |
| O75712 | EQKDFDCNTKQPGCTNVCYDNYFPI SNIRLWALQLIFVTCF    |
| Q9H0T7 | WLKDL EEELHPGEVLVMLVGNKTDLSQEREVTFQEGKEFAD    |
| Q9Y5Z4 | STSVESMDWDSAIQTGFTKLNSYIQGKNEKEMKIKMTAPVT     |
| Q9HAV5 | ESLFPVPPSKETS AESQVSENIFQTQPLNPILEDDCSSTSG    |
| Q99618 | SELDLPLGTQLSVEEQMPPWNQTEFPKQVFSKEEARQPT E     |
| Q3KPI0 | HFQNVTL EDTGYITLQV TYRNSQIEQASHHLRVYESVAQPS   |
| Q28071 | KEFRASLYKGADSAVEVCAVNGHSHPLQSTNKEFNCTVKV      |
| Q8BH50 | LASTESDKP TTRGVYESDSSNHCM LSPSSSGHLADSDTLSS   |
| P56750 | VGTLAT TLLPQWRVSAFVGSNIIVFERLWEG LWMNCIRQAR   |
| P97769 | PSFNLHPTPHLMASMLQKLN SQYQGAATAAAAL TGAGLP     |
| Q9BXS1 | AKSDRIWGEHEICYLLLRKNVTLNPD PSETKSILYLSQEE     |
| O60812 | LQAIKQELTQIKQKVDLLENLEKIEKEQSKQEVEVKNAKS      |
| P09021 | VSEQFRDSASMHSGRYGYGYNGMDLSVGRSGSGHFGSGERA     |
| P47876 | AAQQKAGDEIYK FYLPNCNKNGFYH SKCETS LDGEAGLCW   |
| Q8C7B6 | EDWLKSA LQRSIC SQHESLVNDFLLQVCNRCPNLTSVTL SG  |
| Q91ZT8 | VSDWSPLHDAAIHGCLLTLRNLISQGW PVNIITADHVSPLH    |
| Q9GZT6 | SETSNKIDAEIASLKTLMESNKLETIRYLAASVFTCLAIAL     |
| P50992 | YYGKKAQPHYSNPLVAAKLLNVPKMQVSI VCKILADHVTF     |
| A1A546 | LFHFTHYPDIHVRSQLASRINLPEARVQIWFQNRQAKWRKQ     |
| Q05685 | TCKRDWHKGWDWSSGINKCPNTAPCHTFEY YFPTPASLCEG    |
| Q96E17 | DWSTQIKTYSWDNAQVILVGNKCDME DERVISTERGQHLGE    |
| Q9MZ06 | NPTSCL ELHKNNAYWKQIGRNLRSQKVICGDAKSVLKTRVC    |
| Q9CQ52 | MVCAGGDIQSGCNGD SGGFLNCPADNGTQWVHGVT SFVSSL   |
| Q92737 | QRI AETRPA G APEAPILVVG NKRRDRQLRFGPRRALAALVR |
| Q3MHF7 | LLARHGRQHTIMP SKVNYQANIWALKEEGCTHVI VTTACGS   |
| Q9Z260 | SAFIESNIVVFENRWEGLWMN CMRHANIRMQCKVYDSL LAL   |
| Q9BV86 | IPPTVDGMLGGYGHISSIDINSRKF LQRFLREGPNKTGTS     |

|        |                                             |
|--------|---------------------------------------------|
| Q9D6K7 | LGEIVLAIRSFQIALHIYPMNPELWKEDLSWARKLQEQQKV   |
| P56537 | NSLPDTVQIRRVEERLSALGNVTTTCNDYVALVHPDLDRETE  |
| Q80X91 | VRRQEPALRGGPGPLTPHFCNELGASASPRTPGPARRGSGR   |
| O70273 | ESPDMMKKEQDHFVKSHTKKHNRGTHLWEFIRDILLSPKDN   |
| P14509 | LRWLAGHISVPSVVSFVRTPNQAWLLTTAIGHKTAYQVLKS   |
| Q9Y478 | EEIKAPEKEEFLAWQHDLEVNDKAPAQARPTVFRWTGGGKE   |
| O43731 | FLGLYRALYLANWIRRYQTENFYDQIAVVSQVQTI FYCDF   |
| P15328 | PNLGPWIIQQVDQSWRKERVNLVPLCKEDCEQWEDCRTSYT   |
| B1ANY3 | GLSLPSGGPVLFPVKESARRNPASAATPSAAVGLFPAPTEY   |
| Q14964 | SITRSYYRNSVGGFLVFDITNRRSFEHVKDWLEEAKMYVQP   |
| P54709 | KLHVGYLQPLVAVQVSFAPNNTGKEVTVECKIDGSANLKSQ   |
| Q9ESG4 | CIVTVAIALLVLSGIRQRRRNKGGPPVEDAEDKCENIITI    |
| Q32KW0 | DEAFTNQLPAGLITADGQQQNVVMVYTTTSYQQISGVQQIQFS |
| Q9NYP8 | LLLISTLGVFALNCFKTKGKNSTLIFTRENTIRNCSCSADI   |
| Q9NPF0 | LRNATTMGPPVTLESVPSVGNATSSSAGDQSGSPTAYGVIA   |
| A3KN25 | PSSNYSPTSQSAKRCKAPTDFPVVEIRERPEAGERGSEV     |
| P27811 | YNSFWIGLRYTLPDMNWKWINGSTLNSDVLKITDDTENDSC   |
| Q8IUI4 | SDHSSVNIMSAFESPFGPNSNGSQSSNSWKIDSLSLNREFG   |
| O43657 | KIQNTLHCCGVTDYRDWDTNYYSEKGFPSCKLEDCTPQ      |
| Q7Z6A9 | SWKEEKNI SFFILHFEPVLPNDNGSYRCSANFQSNLIESHS  |
| Q8N5P1 | SPKSSLHRKSRSKDYDVYSDNDICSQESDNFAKELQQYIQ    |
| P19075 | KQFQEAIIVFQEEFKCCGLVNGAADWGNFQHYPELCACLD    |
| A5D989 | KIWFDKFKYDDAERKFYEQMNGPVAGSSRQENGASVILRDI   |
| P01911 | SDVGEFRAVTELGPRDAEYWNQKDIQARAAVDTYCRHN      |
| Q9JL59 | LNAHNDVWDEPCCTEHEVSVNRGSRVVMACNISNNLRDVTI   |
| Q3ZCH5 | YYKDREGSHTFQGAFGCELRNNESSGAFWGYAYDQDFIKF    |
| Q9X2V8 | HLNIFKSDCLTYSYALKRILNSRNI DAHLVIGVRTQPPYSH  |
| P19217 | VITYPKSGTTWLSEIICMIYNNGDVEKCKEDVIFNRVPYLEC  |
| Q8N144 | SVAELGHLLWKGRPRAGERDNRNRAHEEAQKLLPPPPPPP    |
| Q9R1Q6 | SCLLLLACIATAAAAATVLGVNSLIRQTSVPYYVEIFSTCNP  |
| P10279 | GWGQPHGGGGWQGGTHGQWNKPSKPKTNMKHVAGAAAAGA    |
| P70190 | PFLTQVTGRIFVQAHFFRCVNLHIEVSKDLKESLEVVNQAQ   |
| Q96PM5 | ENCGICRIGPKEDFFHCLKCNLCLAMNLQGRHKCIENVSQ    |
| P09237 | LYAATHELGHSLGMGHSSDPNAVMPYPTYGNGDPQNFKLSQD  |
| P68401 | NHENTAEEVAGGIEAIVQLINTRQPQAKIIVLGLLPRGKEP   |
| P08865 | NLKRTEKLLLAARAIVA IENPADVSVISSRNTGQRAVLKF   |
| P61267 | PDEKTKQELEDLTTDIKKTANKVRSKLAIEQSIEQEGLN     |
| Q3KNM2 | LVFPPTIATIVGKLMFSSVSNLQRTILGGIAFVAIKGAFKV   |
| P41238 | CLLYEIKWMSRKIWRSSGKNNTNHVEVNFIIKFTSERDFH    |
| Q9EP73 | YGGADYKRITLKVNPYRKINQRISVDPATSEHELICQAEG    |
| Q9CR00 | KQARDMAEAREEAMNRRLASNSPVLQAFARVNSISPGSPA    |

|        |                                             |
|--------|---------------------------------------------|
| Q08624 | RIETIAHSLCLSERQIKIWFQNRRMKWKKDHRLPNTKVR SAP |
| Q9D3G2 | VLSVSLGLGDKDVAFTCIASNPFVSWDMTTVTPWESCHHEAA  |
| Q99N09 | CLQSKELRPTEYHYHQFLDRNECFAAKSVLAGVFSMLLIST   |
| Q5SX19 | GLARLEQQVSLLCFSSGNYYNQGEIRKKELLQSCAVLGIPP   |
| Q9CXW3 | IETELKNKMQQKSQKKPELDNEKPAAVVAPLTTGYTVKISN   |
| P40259 | QSPRFIARKRGFTVKMHCMNSASGNVSWLWKQEMDENPQQ    |
| H3BS89 | HRDRCKAFNTRRVDPGFIYNNNNLPLRASRSLDRWEGKL     |
| Q8BGN8 | NQGRYNQESYGSSGGYSQQANLGPSTSEDFGQQPSGPTS FNN |
| Q9NVV0 | EVTRTWKIVGGVTHANSYKNGWIVMIAIGWARGAGGTIIT    |
| Q8C8C1 | GTARLDESSMLEENTESLVDNLITSLREQCYGERGGHYRIH   |
| Q91WG1 | VLFFIGVFLALVNLQLIQRNVTLPFPDVTISIFSSAWWVP    |
| O00161 | TMLDEQKEQLNRIEEGLDQINKDMRETEKTLTELKCCGLC    |
| Q15475 | AAEAKERENTENNNSSNKQNLSPLEGKPLMSSSEEEFS      |
| Q3TEW6 | LLTARISALEVHTPKEIFVVNGTQGKLTCTFDSPTTGWLT    |
| Q9D9F8 | RELGNEVPSEDELELPGRKTSNFQVLQPCRDEGASAECSIVE  |
| Q9HAT0 | ALSRGETPPVRERSERVALCNRAELTPELLKILHSQVAGRL   |
| Q9D6Y1 | NCSQGQQLTTFSSDWEVQEDNRLMCSSVQKALFEEEDHVKK   |
| Q96SN7 | FALLISTCILPNVEAVSNIHNLNLSISESPHERMHPYIELAW  |
| O95848 | SVGRCAASPYLRPLTLHYRQNGAQKSWDFMKTTHDSVTVLLF  |
| Q2HJ54 | YHLQSKVPTFVRMLAPEGALNIHEKAWNAPPYCRTVITNEY   |
| Q9Y5U4 | MRCVAVFVGINHASAKVDFDNNIQLSLTLAALSIGLWWTFD   |
| Q92600 | NIYPSINPPTLTAHQSNRVCNALALLQCVAHPETRSAFLA    |
| Q6ZQT7 | WLSAAFPGPAFDWRPLQAQNLPSGGLQARPRRPHSGLS      |
| P02763 | LPLLEAQIPLCANLVPVPI TNATLDQITGKWFYIASAFRNE  |
| Q80ZA7 | DDFFPTACIIRDNQVVACNNQPYLSESECLKSKCCSSTSG    |
| P70280 | WCGGNFLEVTEQILAKIPSENNKLTYSHGNYLFHYICQDRI   |
| Q9P0W0 | WKERHLKQIQIGLDQQA EYLNQCLEEDKNENEDMKEMKENE  |
| Q7Z5L0 | LVAFSLRVEAPTTLGDNTAANNVFRCS DGEELQGPGLSWG   |
| Q99LQ7 | PFREHHIDPTA ITRHDFIETNGDNCLVTLPLLN MAYKFRT  |
| Q7TQB9 | MIVASLASSRFCLHGIAI LANLLASFDFCYQANLIGILWDF  |
| P49406 | DALPEYSTFDVNMKPVVQEPNQKVPVNELKVKMKPKPWSKR   |
| Q9CQJ2 | HAELDAKGQGTAYDVAVNSNFYLRMQNSDFLRELVTIAR     |
| A5D7F5 | SFDALDTWLAEMKQDLGPHGNMENIVFAVCANKIDCTKHRC   |
| Q96DX8 | LKTGNSSPGIGAVYLANQAKNQSAEAKGSGYEKLGPSR      |
| Q8WVD5 | LVRESGSLTYEEFLGRVAELNDVTAKVASGQEKHLLFEVQP   |
| A8MXD5 | LPVVFDGHYLGGAEKILSMNESGELQDILT KIERVQHPHE   |
| Q29463 | ASAGTECLISGWNTLSSGVNYPDLLQCLVAPLLSHADCEA    |
| Q9P0W0 | IGLDQQA EYLNQCLEEDKNENEDMKEMKENEMKPSEARVPQ  |
| P26441 | MPVASTDQWSELTEAERIQENLQAYRTFHVLLARLLEDQQV   |
| Q9D112 | TTDPDSNSLNTEQKGSWDS ENFWLDPSSKGQLETNEEDGL   |
| Q5E9K1 | VSSLQGEDCREAVQH LRAGANLPEEQLGAL IAGTHTLQQA  |

|        |                                             |
|--------|---------------------------------------------|
| Q5JPT9 | GSITIEKEGLSNIKLVKVEDFLNLSTQLSGFHCIDKGTFDAT  |
| Q8N4C9 | IRELQMQETHETETKRRTTFIQNRTIATLQCLGSDSKVKVNLV |
| Q9Y3B6 | VWGAQAGLVVAGYHANAANDQSPGPLALKIAGRIAEFFP     |
| P51809 | LDKVMETQAQVDELKGMVRNIDLVAQRGERLELLIDKTEN    |
| Q99614 | RMKQDKKEMAINDCSKAIQLNPSYIRAILRRAELYEKTDKL   |
| Q9NYZ1 | FITCMVTIILLSCDFWAVKNVTGRMLVGLRWNNHIDEKGK    |
| P43487 | THADFADECPKPELLAIRFLNAENAQKFKTKFECCRKEIEE   |
| Q08E12 | AIPEGTKLELPLWLAKGLFDNKRRLISVELPKIYQEGWRTV   |
| P18128 | RLMCADLCQTGFCLSIENRNFPESSILYLASKGVFSFICL    |
| Q5E9B7 | NPESNTAGLDIFAKFSAYIKNSNPALNDNLEKGLLKALKVL   |
| Q30167 | FECHFFNGTERVRLERRVHNQEEYARYDSDVGEYRAVTEL    |
| P50553 | GYSLPQQPAAVARNRERERNRVLNVLGFATLREHVPNGA     |
| Q32L47 | ESNNLRLVTEYNAITAIGLFNSMIPHLLLMNKASSEFEE     |
| Q9NP55 | LDGLGPLPIQGLLDSLTGILNKVLPVLQGVNCPVNEVLR     |
| Q9Z0H7 | PFSSMASSLNLPLVLEVGRTESSFSFSSATLPRPGDPGAPFLP |
| P24863 | LMAPTCVFLASKVEEFGVSNTRLIAAATSVLKTRFSYAFP    |
| Q9JHB3 | EPWEDLSLVQRESLNHHYHQNCGCQITTCYAVPCTISAPNE   |
| Q9CQ56 | QGLQEKLAEEMGLARSLKTNLAAQSVIKKDNQTLSHSLK     |
| P50289 | TPLPSTSAAITINCHTCAYMNDDAKCLREGVCTTQNSQQC    |
| P05141 | LSFWRGNLANVIRYFPTQALNFAFKDKYKQIFLGGVDKRTQ   |
| Q14002 | YVFSEPPKPSITSNFNPNVENKDIVVLTCQPETQNTTYLWW   |
| Q99627 | STTRMVLPRKPVAGALDVSFNKFIPLSEFAPVPPIPNEQQL   |
| A6QLC6 | IPVRSRVREFDSSSTLNESVQNTIMRDLKAVGKFMHVLYPR   |
| Q9UF72 | SPSIGTVPPPVAVGHTSLLPVNPPAISTTSDLSAREDATPS   |
| Q505H4 | NCFAGTTIIPAGIEVKVDDCNICHCHNGDWWKPAQCSKREC   |
| P56966 | GLFFQIRDDYANLHSKEYSENKSFCEDLTEGKFSFPTIHAI   |
| Q8N144 | LVLATVGGAVFEDEQEEFVCNTLQPGCRQTCYDRAFPVSHY   |
| P32326 | SHRCGFGSNAYFCDVFKRKYNMTPSQFRLQSRQSNDFNIT    |
| Q8HXY9 | TSEEDEDYVPSGGEYSEDDINELVKEDEVDGEEETQKTGT    |
| Q96EC8 | FVIVWFGAVTTTLNSKLLGGNISFFQSLCVLGYCILPLTVA   |
| A6NCJ1 | RASDYVPSLSAPQRPPTQNYREWVLEPYCPSTCQRSPPS     |
| P28068 | GSLTNRTRPPSVQVAKTTFNTREPVMMLACYVWGFYPAEVT   |
| P58417 | IVEFDLAQQTVIDAKDSKSFNCRIEYERVDKATKNTLCNYD   |
| Q9CQD1 | AKTSMNVNEIFMAIAKKLPKNEPQNPGANSARGRGVDLTEP   |
| Q9HB31 | CLPEAKVQVWFQKRWAKIKNRKSGLSPGSECPQSSCSLP     |
| P16152 | ELQQKFRSETITEEELVGLMKNKFVEDTKKGHVHQEGWPSSA  |
| P10144 | EQEPTQQFIPVKRPIPHPAYNPKNFSNDIMLLQLERKAKRT   |
| P70379 | GYLQMHDPDGDALDGTKDDSTNSTLFLNLPVGLRVVAIQGVK  |
| Q921D4 | GSVLDYFSERSNPFYDRTCNNEVVKMQRLTLEHLNQMVGIE   |
| Q7M721 | FGISLNCVLLLIYSLSKHLKNMIFYGKGCQDQSTMVHIKAL   |
| Q24K06 | PVHVCSFQELVKLYLSDNRLNSLPELQQLQNLQILALDFN    |

|        |                                              |
|--------|----------------------------------------------|
| A5PJN0 | SIRGVDLDFREILLRHCDVNDGKIQKSELALCLGLKINP      |
| P0C8J7 | MYASAPVLDFSRLLENIRQWVNLPLVLHGASGLSTKDIQQT I  |
| Q0VCT4 | KGPSEMEDSEDKCENVIT IENGI PCDP LDMKGGHINDAFVT |
| Q9Y287 | LNLDRKYVIPLNTSIVMPPRNLELLINIKAGTYLPQSYLI     |
| Q6ZMS7 | QEYGLLQRRLENVENLLRRNFWILRLLPPGSKGEAPKVPVT    |
| Q35723 | VSTSTEIINGKKITTKRIVENQERVEVEEDGELKSLIING     |
| Q5XFZ0 | GSCPQARYLLWAYSSTHEDNSTFQETCPHCFQLLVLDNSR     |
| P61266 | RDRCKDRIQRQLEITGRTTTNEELEDMLBESGKLAIFTDDIK   |
| Q99JZ0 | GLSLSSQEVQKNTQIPDSDNMVVTSPPGPGVVAAPVSGNNL    |
| Q43423 | RIHSELNRNAPS DVKELALDNSRSNEGKLEALTDEFEELEF   |
| Q8N9P0 | LFPFIHFCWSPRAAAPGVAMNGWMPARWDHQVRRDVAGARG    |
| Q0VD07 | FMLAWLGVTAF TSLPVYMYFNLWTICRNTTLVEGANLCLDL   |
| Q15771 | LFLDLACRLISEARQNTLVNNVSSPLPGEGKISYLTCCNF     |
| A6H707 | EQSYAGRVLPDDL LLLHMNARYLREADVARIAHLTRCGV     |
| Q6L8G5 | GCGSCGSGKGGCGSGCSQCNCCKPCCSSGCGSCCQSSCC      |
| Q9NQT4 | TSVLAGVYGPAEVKVSKEIFNKATLEVILRPKIGLPGVAEK    |
| O08849 | EKEAPKEINIDFQTKSLIAQNIQEATSGCFTTAQKRVSLSM    |
| Q9CZ92 | ELRALEAEVAALQRECRMLQNAEKASGAWKSFQKISQSDS     |
| Q9BXL8 | QSLDMSLVKQLQCHMLVEPNLCRSVL IANTVRQIQEEMTQ    |
| Q9BPX1 | GRMGQPAEVGAAAVFLASEANFCTGIELLVTTGGAELGYGCK   |
| Q0V7M7 | VVSKYKILHQPKKSMSSVARNLYHRFIDEETKETKGHYFVV    |
| Q3T040 | SSVFEDPVISKFTNMMMKGGNKILARSLMTQTLEAVKRKQF    |
| P47962 | IVCAAYAHELPHYGVKGLTNYAAAYCTGLLLARLLNRFG      |
| O35621 | AEQLGEGDEVIEKFDYVFAENGTVQYKHGRLLSKQTIQNH     |
| P48787 | SDAAGEPQPAPAPVRRRSSANYRAYATEPHAKKSKISASR     |
| Q15404 | NSLPGNFFYLTTLRALYLSDNDFEILPPDIGKLTQLQILSL    |
| Q02878 | VKKGNLKA KPKKPKGPHCSRNPVLRGIGRYSRSAMYSRKA    |
| Q16637 | LLSPICEVANNIEQNAQENENESQVSTDESENSRSPGNKSD    |
| Q8WXJ9 | TRQSNIFKILLQYGILEREKNPINIVLTVLYPSRVRVMVD     |
| Q15848 | PLPKGACTGWMAGIPGHPGHNGAPGRDGRDGTPEKGEKGD     |
| Q9BX51 | TINLYFGSKVRSPVSGILLNEMDDFSSTISITNEFGVPPSP    |
| P26717 | NKSSISGTEQEIFQVELNLQNPSLNHQIDKIYDCQGLLPP     |
| Q9BXN2 | PCPPNWIIYEKSCYLFMSLSLNSWDGSKRQCWLGSNLLKID    |
| Q8NAJ2 | AVHSCVARAWPGDPQEVRLNPLLCDPGSQVEPSWPHHPGL     |
| P97351 | QQVRQIRKKMMEIMTREVQTNDLKEVVNKLI PDSIGKDIEK   |
| Q14847 | TCKMTLNMKNYKGYEKKPYCNAHYPKQSFTMVA DTPENLRL   |
| Q5JUQ0 | TCTIVGPTKRDSKFIISMNDNFYPSVTWAVPVSESNVAKLT    |
| P00493 | PSVVISDDEPGYDLDFCIPNHYAEDLEKVFIPHGLIMDRT     |
| A1YQ93 | APEIAAMPAEVSPYLQKEMINFQHTNAGIFIPSTS QKPSTT   |
| Q9UHQ4 | FWLVLRRLVTLITQLAKELSNKGVLKTAENTNKA AKKFME    |
| O88574 | KSARHLYICDYHKNLIQSVNRNRKRKGSDDDDGGDSPVQDID   |

|        |                                               |
|--------|-----------------------------------------------|
| Q8QZV2 | CCCRCLRPKQDPQQSRAPGANRLMETIPMIPSASTRGSSS      |
| Q9EQF4 | SPERRNSGRCLQKWFEP T LSNPNVEVALHFAGSALAPQLSY   |
| Q14847 | KFWHKACFHCETCKMTLNMKNYKGYEKKPYCNAHYPKQSFT     |
| O35257 | DEYGEMSIYDLLDHVTILSHNVSELTAEMHRIFMEDVRYKP     |
| Q8N6D2 | DTAESQASDELECKICYNRYNLKQRKPKVLECCHRVCAKCL     |
| Q8BJU2 | STTPLWRTGCYEKVKLWFDDNKHVLGTVMCILIMQILGMA      |
| Q3T0X5 | KHGLRALRETLPAEQDLTTKNVSIGIVGKDLEFTIYDDDDV     |
| P47757 | HIANIGRLVEDMENKIRSTLNEIYFGTKDIVNGLRSLDAI      |
| Q02878 | VVFLKQLASGLLLVTGPLVLRVPLRRTHQKFVIATSTKID      |
| Q68D42 | GLRGKPPPPQSQGEVSVASSINSPTPTEEGECQSLVQNGHQE    |
| Q78JT3 | PVCNKLHQEQQLKIMFVGGPNTRKDYHIEEGEEVFYQLEGD     |
| Q05B50 | YPSNQTLKDYLSWRQADCHINNLYNTVFWALVQQSGLTFLQ     |
| Q8NGU1 | GTLELALMGMAVDRYVAVCNPLRYNIIMNSSTFIWVIIVS      |
| Q4KXC9 | LRILNECPNIRWDNLSECLLNRYRIHNKSTQKSALAYECAS     |
| C9J442 | THSEPIFCFTTISINTCLLPQNSSWKAQVVPCLHDGQTRPA     |
| H7C241 | YPPGIACVGI FRVCIYRRRTNSTTTKFCYRYSYQDTFLPFE    |
| Q3UPR9 | PFAMNSVSLRCSGDGLSDGNQTLRWQAIGNPRCQGTWKKV      |
| P55075 | DTFGSRVRVGAETGLYICMNNKKGKLIAKSNGKGDVCFTE      |
| Q6S5G4 | SAWSDEQFEFH CNTQQPGCENVCYDHAFPI SHVRLWVLQVI   |
| P23560 | FEHVIEELLEDEDQKVRPNEENNKDADLYTSRVMSSQVFLE     |
| Q15493 | TKFCALNWKEQS AVVLATVDNDKKNR FNDGKVD PAGRYFA   |
| Q497H0 | KAPSLPPRCPCGFWSKTMNLCSKCFADFQKKQPD DDSTP      |
| Q64317 | EDPGADSEKSTVVEGGEVRFNGKGGKIRKPRTIYSSQLQA      |
| Q2HJ1  | PESQLGLWGEGWLKGHRYVNNDFSKRVKVKVWKPQLFQRE      |
| Q7Z7D3 | IGFGISGRHSITVTTVASAGNIGEDGILSCTFEPDIKLSDI     |
| Q14331 | KREDEETQLDIVGIWWTNFG EISGTIAIEMDKGTIYIHA      |
| O15217 | LELLIMHPFLKPDDQKEVVNMAQKAIIRYFPVFEKILRGH      |
| Q92637 | RNGKAFKFFHWSNLTILKTNISHNGTYHCSGMGKHRYTSA      |
| Q0VCT9 | PGTVNGGHPPSALAPAARFNNSQFMGPPVASQGGSLPASMQ     |
| Q9CQ28 | MQCI AEGHQI VALANLRPDENQVESDELDSYMYQTVGHAI    |
| P20826 | LLL FNPLVKTKEICGNPVTDNVKDITKLVANLPNDYMITLN    |
| Q00169 | CPYMCA YKLVTVKFKWGLQNKVENFIHKQERRLFTNFHRQ     |
| P02830 | SGYGP GAGAFAS TVPGLYNVNSPLYQSPFASGYGLGADAYN   |
| Q8K3W2 | IRYFPSLAHLTNLKLVIYDHNPCR NAPKVGKGVRRVGRWAE    |
| P82348 | LESPTRSLSMDAPRGVHVKANAGKLEALSQMDIILQSSEGV     |
| Q05717 | ASLQELKASPRMVPRAVYLPNCDRKG FYK RKQCKPSRGRKR   |
| Q9P0I2 | IRENGKYIPKQSFLTRKY YFNNPEDGFFKTKRKVVPPSPM     |
| Q0I187 | YVRF SKEQLPIFKAQNPDAKNSELIKKI AKLWREL PDSEKK  |
| Q9CZE3 | STFD AVLKWKNDLDSKVHLPNGSPIPAVLLANKCDQKKDNS    |
| Q3TEW6 | PPFKDRVTWAGDLDDK DASIENIENIQA VHNNGTYICDVKNPP |
| Q8TDQ7 | DEYVGLPRNHPE SYHSYMWNFFKHIDIDPNNAHILDGNAA     |

|        |                                               |
|--------|-----------------------------------------------|
| Q8BV13 | CEAVLLGIEQQVLRANQYKENHHRTOQQVEAEVSNIKKTLK     |
| P23409 | QQEKMQELGVDFPFSYRPKQENLEGADFLRTCSSQWPSVSDH    |
| P80219 | GMMCSVAGWGR LGVNM PSTDNLQEV DLEVQSE EKCIARFKN |
| P18128 | AGRRRCRVGIRPPCRASVPCGNPPTLPGAGAVWKF AHLHDKN   |
| Q8BVH9 | SCREYEGQKLTLEAGCGVGNCLFPLLEEDLNL FAYACDFS     |
| P22615 | NLPENHLN ISSLPWVSFDGFNLNITGNDDYFAPVFTMAKFQ    |
| Q8N614 | QDITGEFKMCSSCLVCE SKGNMDFISQEQTSKVLIRRGSM E   |
| P15246 | ATISAPMHAYALELLFDQLNEGAKALDVGSGS GILTACFA     |
| Q16635 | TVLIGKPF SALPVLERLRAENKSAVEMRKAL TDFIQEEFQH   |
| P60880 | NLEQVSGIIGNLRHMALDMGNEIDTQNRQIDRIMEKADSNK     |
| P36369 | TPTRWQKSDDLQCVFITLLPNENCAKVYLQKVTDVMLCAGE     |
| Q8R1J3 | ALKKDSRREGRR LKRAAKKNAMVCFCHRQPGHGIADCPAV     |
| Q9WV35 | KEAGCKLRIMKPQDFEYIWQNFVEQE EGESKAFEPWEDIQE    |
| A1YQ93 | LGATMSAPLI PQHLSASNSNELLLNLNNAQLRPLQLQGPF     |
| Q60932 | SPNTGKKNAKIKTYGKREHINLGC DVDFDIAGPSIRGALVL    |
| Q3T168 | AESVQVNFTE RSFDLLVKNLNGKSYSMIVNNLLKPI SVEGS   |
| Q61168 | ILTLCSSYMEVPTYLNFKSMNHMNYLPSQEGVPHSQFINMM     |
| P48230 | NSTWGYPFHDGDYLNDEALWNKCREPLNVV PWNLT LFSILL   |
| P02746 | KVPGLYYFTYHASSRGNLCVNLMRGRERAQKVVTFCDYAYN     |
| Q6P073 | VVEEIKQKQKAQDELSNRPQNLPLPDVVFDGELHRGQHGIQ     |
| Q96B26 | LKENCRPDGRELGEFR TTTVNIGSISTADGSALVKLGNTTV    |
| Q9CQ29 | PLAHRKEHQDSCPFELMACPNEGCTVQVLRGVLDEHRQHCQ     |
| Q8BXV2 | RGSPGGLCSPSVEEKLEHLENQVRLNIRLN RVLENLDRSK     |
| Q9H7V2 | EEEEFQELES DYSSDTESEDNFLMPPRDHLGLSVF SMLCC    |
| P62993 | DELSFKRGDILKVLNEECDQNWYKAE LNKGDGFIPKNYIEM    |
| Q9NP15 | GGMTNGGKTTLTNSLLRALPNCCVIHQDDFFK PQDQIAVGE    |
| Q92979 | VVLEGASLETVKVGKTYELLNCDKHKSILLKNGRDPGEARP     |
| O08542 | AALLGSRLPGCSSLRHP IYWNSSNPRLLRGDAVVELGFNDY    |
| Q8WV35 | VLQFLQLRQLSLSLPELTDNGLVAVARGCPSLEHLALSHC      |
| Q8TD07 | IKSLSRPGQPWCEAQVFLNKNLFLQYNSDNNMVKPLGLLGK     |
| Q86UD3 | LYNEWRRTNQRVILLI PKSVNVPSNQPSLLGLHSVKRNSKE    |
| Q8IVV8 | QYRLRYVMVYTLWAAVWVTWNVFIICFYLEVGGLLKDSSELL    |
| Q8BQP9 | HRKGKEASGGAKNLD SKIEENAETPALED SLSPPLESQQQC   |
| Q9NPB3 | ETADMIGVREL RDAFREFDTNGDGRISV GELRAALKALLGE   |
| P16152 | SIRALRDFLRKEYGGLDVLVNNAGIAFKVADPTPFHIQAEV     |
| Q4U5R3 | GSYFPKKISELDAFLKEPDLNEANLSNLKAPLDIPVPDPVK     |
| Q9UFN0 | IFYEFRSYLLKPSKMNEFLENFEKNAHLRTAHSELVGYWSV     |
| P48230 | PKCLMANSTWGYPFHDGDYLNDEALWNKCREPLNVV PWNLT    |
| P97382 | NRSDPNSPMEEIVRAMTYVINQGLALYWGTSRWSAAEIMEA     |
| Q1HCM0 | RQSVRSPSSQPEKKPLL VKSNSGGRKAGSDPVPEPPAAAGF    |
| P57746 | AFSLAEAKFTAGDFSTTVIQNVNKAQVKIRAKKDNVAGVTL     |



|        |                                             |
|--------|---------------------------------------------|
| Q8BVA2 | DNCHSHVALALNLMRYNNSTNWNMVTLCFCFLIYGKYVSVG   |
| Q9NZ43 | LEDMLQALKVHASKPASEVINEYSWKVDFLKGMLQAEKLS    |
| P24158 | NYDAENKLNVDLLIQLSSPANLSASVATVQLPQQDQPVFHG   |
| Q92482 | GLEAFTVGLVVLVIGTSMGFNSGYAVNPARDFGPRFLTALA   |
| Q9CRA4 | QKDKPETFEGQWKCLKKILFNHFFIQLPLICGTYFTEFFN    |
| P10629 | SRGPYDYGNSFYQEKDMLSNCRQNTLGHNTQTSIAQDFSS    |
| Q9H0Z9 | GYGFVTMADRAAAERACKDPNPIIDGRKANVNLAYLGAKPR   |
| Q2YDP6 | DPLHQDCSCFEKCLLCTPQNNYDRGKLPYHAWASFPLASG    |
| Q810M1 | VSGYIDYAHRLKSEDFEVYFNGKRRLPRTTDMSFYNWDSH    |
| Q9NP72 | VILVYDVTRRDTFVKLDNWLNELETYCTRNDIVNMLVGNKI   |
| A4IFL0 | LLYSAFGVIIEKTRGAEDDLNTVAAGTMGMLYKCTGGLRG    |
| Q8TAZ6 | KHEVGTRRGCRRYRWELKDSNKEFWLLGHAEIKIRSLGLI    |
| P53674 | EQSNFRGEMFILEKGEYPRWNTWSSYSRDLMSFRPTKMD     |
| Q9JHL0 | ERKNKMLFSLHLEGPESPRYQNFYKGSNQEPAAYVDPIPTN   |
| P20774 | IKPAPPTQQDSRIIYDYGTDNFEEISFSDYEDKYLDGKNI    |
| P01189 | LECIRACKPDLSAETPMFPGNGDEQPLTENPRKYVMGHFRW   |
| Q08DA8 | GTTILQYAQTSDGQQILVPSNQVVVQTASGDMQTYQIRTP    |
| Q08DY6 | YLTRKFMDLVRSAPEGGILDNLKVATKLGVRKRRVYDITNVL  |
| Q8VCI7 | AYLAALLLDTAFFSHRLGANGSCGLVVALETQKEAEADAP    |
| Q9NP55 | PLNVNPAFLSPTGLAGSLTNALSNGLLSGGLLGIENLPL     |
| Q9ESJ7 | YHTPGSVENLRRQACLVAVENAWRKAQEVCDLVGQTLGKPL   |
| A6NN92 | LVIVLVPALFHYAACKSINQECILQKPIYTIYIILSVLL     |
| A4FV75 | LEAYICPVLFGSASGGHHHNNHGGSQGGSGPGSPHSPPLPS   |
| P20783 | SSAIDIRGHQVTVLGEIKTGNSPVKQYFYETRCKEARPVKN   |
| Q8N567 | GTSQNLPKRKQLEANRLSLKNDAPQAKHKKKKKKKEYLNED   |
| O35975 | VLIPIGYEVYHKVTAQNDNGYNEIFLDSPERKKSNNFCFYNG  |
| Q9UMS0 | SVFFGPDFITVTKENEELDWNLLKPDYATIMDFASGLPL     |
| P04187 | QVIMVKCIPHPDYNPKTFSNDIMLLKLSKAKRTRAVRPL     |
| Q9D1G5 | LLKSLSLNNKLTVLPDELCLNKKLETLSLNNHREL PST     |
| Q9NYV7 | YVLCNLITITWEEFNILTFWLNSSLTVFYCIKVSFTHHIFL   |
| P08882 | LTVQKDQVCESQFQSSYNRANEICVGDGSKIKGASFEEDSGG  |
| Q810N6 | NFRGEKARDVAARYSQVECVNFLDWADARLIKKIITKSSL    |
| Q9D099 | VFLLGFLWNIDNIFCDSLRNFRKRVPPVLGVTTQFHAWWH    |
| Q9D8C8 | DHELEAPALQSSALSLELQNARAASVAVASQDFDASKAVEEQ  |
| O60671 | YGYPLMLFLEEGGVTVCKINTQPEETLDFDFCSTNVINK     |
| Q6P1B3 | WAIWGPVTSREDGGDPNSVNPGLPLDYGFAPPHGLATPH     |
| Q9BQ51 | TPEGLYQVTSVLRLLKPPGRNFSCVFWNTHVRELTASIDL    |
| Q9JIM5 | QSPSVDTFDEEPPLLEELGINFDHIWQKTLTVLNPMPKPADG  |
| P14148 | PKTLKKKVPFVAVPETLKKKRRNFAELKVKRRLKFKALKTLRK |
| Q96MC9 | GTSQAAERQRIAHTRALSVMGNCPRSHFQCEFSISKWSEGT   |
| P46638 | DLRHLRAVPTDEARAFAEKNNLSFIETSALDSTNVEEAFKN   |

|        |                                             |
|--------|---------------------------------------------|
| P32971 | ILKRAPFKKSWAYLQVAKHLNKTKLSWNKDGILHGVRVYQDG  |
| Q8C432 | PLEEPAESQASDELECKICYNRYNLKQRKPKVLECCHRVCA   |
| P49888 | EIMNQKLSFFMRKGITGDWKNHFTVALNEKFDKHYEQQMKE   |
| P14231 | KFHVNYTQPLVAVKFLNVTPNVEVNVETRINAANIATDDER   |
| Q9R061 | CGPSIPHMLRAQGKAVHQCDNGWVVPVFDQEQSISLMSVGF   |
| P10949 | GQKSSDQNFDMFKLLIIGNSSVGKTSFLFRYADDSFTSA     |
| Q32KQ5 | HSPWICCTPLWPSDGLVIRNILIVVLSLSFMHLLLGFEF     |
| O75822 | RLKKLQEEEDLELAKETFGVNNNAVYIDAMNPFSSRDDTEF   |
| Q8N4E4 | KQKFGELREISGNQYVNEVTNAEEDVWVIHLYRSSIPMCL    |
| Q08624 | PPRPSYPERQYSCTSLQGFGNSRAHGPAQAGHHHPEKSQPL   |
| Q9NRN9 | NRMSKSFDTVIMNPPFGTKNNKGTDMAFKLTALEMARTAVY   |
| Q9QY36 | NARPELMMQHCNLLCLPENYQMKYYFYHGLSWPQLSYIA     |
| P70331 | TEAVTCQPQGNPQGCTPLLPNGSSHDHLESEPGSAGHAGNGA  |
| Q0VCQ4 | IINLEEVDEEMKSVIEALKDNFNKTVNIRTSFGALDNITVV   |
| Q969F1 | DTLGTCVI FEENVEHADTEGNNKTVLKYKCHTMKKLSMTRT  |
| Q9XT56 | PPSEYKWKDGVEMPLEPKSNRAFSNSSYTLNQKTGELIFD    |
| Q9CQ07 | ASIAKLPKLLKLNKRNPPFNADESEMFDVSIKRENLVYLV    |
| Q0Z7W6 | ILMSSMSALFQLSMWIRTCHNYFIEDLGLPIWGSYTVFALA   |
| Q96S19 | RALLITYGPIAINGKISQSNVDFDMLRCRNPEWGLRDTA     |
| Q2KIB6 | PGGVADRHGGLKRGDQLLSVNGVSVEGEQHEKAVELLKAAQ   |
| Q9JJV3 | LLVAFILSSGGLLTFIILLKNQINLLGFTLMFWCEFTASFL   |
| Q8IWZ4 | PILTQCFECIKTIQQRNLKTNIRLKKMASLARKASLWFLS    |
| Q91U24 | KIALEYIVPCLHEVGFCYLDNFLGEVVGDCVLERVKQLHYN   |
| P04224 | NNTPDANVAPEVTVLSRSPVNLGEPNILICFIDKFSPPVVN   |
| Q3ZC48 | YVRYKQVHALNPEENRIIRLNKAGLVLLSCLGLSLVANF     |
| P98173 | GLPQPCPEEHLAFRVVSGAANVIGPKICLEDKMLMSSVKDN   |
| P61087 | SLQALLAAAEPPDDPQDAVVANQYKQNPPEMFKQTARLWAHVY |
| Q4JM65 | RFQRQKYLSQLQMQELSNI LNLSYKQVKTWFOQRMKCKKW   |
| Q7RTU5 | PKPGPFGGGLALGPAPRGTMMNNFCRALVDRRPLGPPSCMQ   |
| Q8NHS0 | VMSSTEMINGHKVTTKRIVENGQERVEVEEDGQLKSVTVNG   |
| Q3LI81 | TFEDRLCLPSSFHSRTCFLDNFQETCNETTSCQMTNCEQDL   |
| P39039 | WKKDEPNNHGSGEDCVIILDNGLWNDISCQASFKAVCEFPA   |
| Q8CBW7 | PVICLNKRTRRSIQKLEWENNRLYHKLALHWKLTKRKCET    |
| Q719I0 | WGQGNPHWIVEEREDGTNVNNNRWTERDATSLSKGKFQELL   |
| Q9D0U9 | INAILCKTQAYRHILFNKINHGLKCMFCLLCEAYLRWQ      |
| A8C927 | YKLAINDQNTFYIGIDPVKENLFDISKI IKKPSKGLSNV    |
| Q2KIR7 | LPEVINWKQHLQIQSTQSSLNEVIQNLAATKSFVKRSKNI    |
| Q9D6E4 | SREPTDTNVLRYIQLTQLKMNRCSLQREDSGGTGGPARNV    |
| O95685 | VCLERVTCSDLGISGTVRVCNVAFEKQVAVRYTFSGWRSTH   |
| Q3T0M9 | ELHKITRISENQGVPLIVANKQDLRNSLSLSEIEKLLAMG    |
| P57076 | LWAAKELRRTKKLSDYVGKNEKTKIIAKIQQRGQGAPARE    |

|        |                                              |
|--------|----------------------------------------------|
| Q9CWQ3 | DTNPYVKLLLDAMKHSGCAVNRGRHFSCEVCDGNVSGGFDA    |
| A4QP2  | KANRDV I IDQLPDLMLKAVNVKVVGTNPHADRNGGAATC    |
| Q3U4G0 | SFGDEC SHHAYLHGQFWSYWNRFPGPLVIYWYGF IQE LDCN |
| O43247 | QQDLDPWKAAYSSLDTSKFKNQGLSSPQPLPLGASAQGSSL    |
| P61086 | VSSPEYTKKIENLCAMGFDRNAVIVALSSKSWDVETATELL    |
| F1MIW6 | CCPEVAKSYGHKLLTLPSFYNYLNPLDSAWSSLKWF I INNR  |
| P0C866 | TGSRVLNKNYTLVSMAPLTNEIRPVSSCTPQHIGPAIPEV     |
| Q9CYX7 | STVSKKDF I SVLRGMDGTSRNSPAGKSPKARQTEVKSEESP  |
| Q9Y3B9 | GDAEPCDKENENDGESSVGTNMGWADAMAKVLNKKTPESKP    |
| Q6NTF7 | RLRRPYYPKALLCYQLTPQNGSTPTRGYFENKKKCHAEIC     |
| Q91WK7 | RRLGPTGKEVHALKRLRDSANANDVETVQQLLEDGADPCAA    |
| P52823 | THEAEQNDSVSPRKSVAQAQNSAEVVRCNLNSALQVGCGAFA   |
| Q9H5V9 | TIDEEEEIEAREVADSYAQNKVIEKQLERKGMKRRRLQE      |
| Q5E9C0 | PRGFGSLPALEVLDLTYNNLNENSLPGNFFYLTTLRALYLS    |
| Q9D0A3 | GDGPFIDS LAKLELGTVTKCNFAGDGKTGASWTDNIMAQKS   |
| P27512 | EFSAQWNREIRCHQHRHCEPNQGLRVKKEGTAESDTVCTCK    |
| Q8TAG5 | DANYGELQEHKAQAYLKVNSHARRMQAFEASPMWLQDMK      |
| Q6ZTW0 | RLGRALWHLRLAHHSQRAAFNNVSVAYECL SAGRRKRKPG    |
| P20339 | MNVNEIFMAIAKKLPKNEPQNPGANSARGRGVDLTEPTQPT    |
| A1E960 | LISQRLLSASNSHELLLNLNNGQLLPLQFQGFNSWIPFPF     |
| Q03402 | ENLFMSSYLVPWSSVIQGWYNESKGLIFGVGPKQNVSVVGH    |
| Q30154 | RWFRNSQEEKAGVVSTGLIQNGDWTFTLVMLETVPRSGEV     |
| P20490 | RIGQELESKVPDDRLYEELNVYSPIYSELEDKGETSSPVD     |
| Q86W47 | DEHQLLTNPKCSYIPPCRENQKNLESVMNWQQYWKDEIGS     |
| Q91X91 | TLKARFPSSVSEASGGVTLDNLTQFCGTHIDVISLGMLTQA    |
| Q3TQI7 | KDKVSEEDLHLGTSFSAETNRDEDADMMKYIETELKRRK      |
| A8MWL6 | YGEGYSNTHKSKQMYCVFNHNEDACRYGSAIGVLAFLASAF    |
| Q1JQA8 | QIKRANKLFTNDCIFLKKTLNIPVISEKPLLFNGLNSVDSF    |
| O09044 | ASGGYIKRITNDAREDEMEENLTQVGSILGNLKNMALDMGN    |
| Q8CDS7 | DSAKRRQCLQYLNALRSLQHNGYKTVYFGETEIPETLVTGE    |
| P14847 | SFSVFSYATKKNNDILIFWNKDKQYTFGVGGAEVRFMVSE     |
| P13789 | EKFDLQEKFKQKYEINVLNRINDNQVSKTRGKAKVTGR       |
| Q60930 | GWLAGYQMTFDSAKSKLTRS NFVGYRTGDFQLHTNVNNGT    |
| Q8QZW2 | ALYKLPAGLAPLPFPGLSKLNLMAASAGVAPAGFSYWP GPN   |
| Q96CS2 | ESEAKYLQDLLMESVNFSPANLSS TGSRYLNALVDSVALE    |
| Q5E995 | RPRRTGERKRKSVRGCIVDANLSVLNLVIVKKGEKDIPGLT    |
| Q8R2Y9 | APQATTGPPAASPASENQNGGLSTQLGVPVGGPHPSHTPSH    |
| Q5U3C3 | LACPPCRGAI VVFKLQMHMLNGALLALLFPVNVNTRLPPFEL  |
| Q8IUI4 | ERSSMLPTMAAGPNSILFAINIDNKDLNGQSKFAPTVDLL     |
| P79391 | CPQDWLWHEENCYQFSSGSFNWEKSQENCLSLDAHLLKINS    |
| Q99N10 | AKSWEPEQERLTWQPGTVMNVTSPGPMANSVYVVAPPNS      |

|        |                                              |
|--------|----------------------------------------------|
| Q96HF1 | CEACKNKNDNDNDIMETLCKNDFALKIKVKEITYINRDTKI    |
| P62701 | TDITYPAGFMDVISIDKTGENFRLIYDTKGRFAVHRITPEE    |
| Q5E9C0 | LPPELGNLDTGQKQIFKAENNPWVTPIADQFQLGVSHVFE     |
| Q16878 | HGSSIHDHTNSHCFLKMLQGNLKETLFAWPKKSNEMVKKS     |
| Q32KN9 | SSLFGVSRVQEFGLARFKSNVTKTMKGFEYILAKLQGEAP     |
| Q8BGA2 | DWLI GKAKTRSGSGDEQAGMNSEPHYLGILCIRT PAMQQVS  |
| Q92564 | VFHQFLEQSKYKVINKDQWCNVLEFSRTINLDSLNYDEDGA    |
| Q8WWC4 | EKPQQHQKTKMIVLGFSPINWVRTRIKAFLIWAYFDKEFS     |
| P35428 | PADIMEKNSSSFVAATPASVNTTPDKPKTASEHRKSSKPI M   |
| Q9BQ24 | TFLVTFGNSEKPEMTCLRLSNNQRVLFLDGDSHYEIEIVHI    |
| Q92913 | TYSSMIYRQQSGRGWYLG LNKEGEIMKGNHVKKNKPAAHF    |
| P55918 | SCHFANLNGFYLGGSLSYANGINWAQWKGFFYS LKRTEMK    |
| Q9CZ04 | LAAKVKCI PYAVLLEALALRNVRQLEDLVIEAVYADVLRGS   |
| P07451 | PSLQPWSVSYDGGSAKTI LNNGKTCRVVDDTYDRSMLRGG    |
| Q96H79 | CLLYNKGEALYGYCNLKDCKNFHVCKSVFKGECKLQTCKR     |
| P55041 | HCRRSWSSDSTDSVISSESGNTY YRVVLIGE QVGKSTLAN   |
| Q8K5B8 | FRASGAQLPGLPSLSYPRRDNVCSLPWPSAEPCNGYPQPYL    |
| P35428 | FLIPNGAFAHSGPVI PVYTSNSGTSVGNVAVSPSSGSSLTS   |
| Q8R2N1 | DQFIGTAALIVCVLAI VDPYNNPVPRGLEAFTVGLVVLVIG   |
| O60487 | SILLWKLQFDDNGTYTCQVKNPPDVGVI GEIRLSVVHTVR    |
| P09661 | EIRKLDGFLLRRLKTL LVNNNRIRIGEGLDQALPCLTEL     |
| Q6IMB1 | NKGDLLHARQVQTHEGLQLANELGSLFLEISTSENYEDVCD    |
| Q02399 | NVVPKLNATGRDLLQNLKCNFVQRISAEALQHPYFSDFC      |
| P13349 | SPVWSRKSSTFDSIYCPDVS NVYATDKNSLSSLDCLSNIVD   |
| Q91XF0 | KGKELDSNPFASLVFYWEPLNRQVRVEGPVKKLPKEAENY     |
| Q9UUK9 | ARPKPKPGDGEFVEVISLPKNDLLQRLDALVAEEHLTV DAR   |
| Q9UIW0 | RTELARQLNLSETQVKVWFQNRRTKQKKDQSRDLEKRASSS    |
| Q504P2 | TWQESVMAC SARNASLLKVKNKDVLEFIKYKKLRYFWLALL   |
| Q9D4G1 | SLYKGWQTCMFI SFLDVALFNGDSSLKSYSIDNISLSDSF    |
| Q922H7 | LQLASMLGCSFYEVSVSENYNDVYNAFHVLCKEVSPKQQPS    |
| B7ZAP0 | TSKIALRNDLDQAEDKADVLNKELLLTKQRLVETEEERKQ     |
| P33681 | GGFPEPHLSWLENGEELNAINTTVSQDPETELYAVSSK LDF   |
| P62820 | KEFADSLGIPPLETS AKNATNVEQSFMTMAAEIKKRMGPGA   |
| Q8TBZ9 | EQIIKYLCKSEEFMDPATFINMYNRP IHTLDSEVVWPAPS    |
| P49721 | LLLCVGEAGDTVQFAEYIQKNVQLYKMRNGYELSPTAAANF    |
| Q3T0I4 | ADALKAMQYNGVPLDGRPMNIQLVTSQIDTQRRAQSVNR      |
| Q9CQJ2 | LNPEWRMLKYRSFLGSI SQNIRSQRPRIQELGTL DASGS    |
| P53994 | EAFAREHGLIFMETS AKTASNVEEAFINTAKEIYEKIQEGV   |
| Q13571 | FLLITMLFIIISLSLLIGVVKNREKYL LFPFLSLQIMDYLLCL |
| Q6IRU5 | KKDLEEWNRQSEQVEKNKINNRIADKAFYQQPDADTIGYV     |
| Q80XD9 | QSSCIALDAHLALFDSLEELNFLKRYKGASDHWIGLHRESS    |

|        |                                               |
|--------|-----------------------------------------------|
| Q0IIL5 | LQSNALLVQLPELPSKNLFFNMNQRHVQDQRRQGLEDFLRK     |
| Q924N9 | QRVPLQPPYQLHEVKIPIQDNKSKRAYRKKSSDEHKAVAI      |
| Q0IIG8 | FEELVEKI IQTPGLWESENQNKGVKLTHREEGQGGGACGGY    |
| Q58D63 | ERSCPIMSGGPKYEURWQDENKFRRPTALSAPRYMDLLMDW     |
| P15946 | LSLGGIDAAPPVQSRIVGGFNCEKNSQPWHVAVYRYNKYIC     |
| P31955 | KNGKGRRNKKKKNPCTAKFQNFCHGECRYIENLEVVTNCN      |
| Q9Y294 | QRNILASNPRVTRFHINWEDNTEKLEDAESSNPNLQSLST      |
| P61006 | TITTAYYRGAMGIMLVYDITNEKSFDNIRNWIRNIEEHASA     |
| P14901 | MASLYHIYTALEEEIERNKQNPVYAPLYFPEELHRRAALEQ     |
| P10628 | QIKIWFQNRMRKWKDHLKLPNTKGRSSSSSSSSSAAPGQH      |
| ALL157 | VYYQRLSDELKQHLNRTLAENYGQPGATQITASVDRLQQDF     |
| P35270 | LGALRELPRPKGLQRLLLINNAGSLGDVSKGFVDLSDSTQV     |
| P14483 | GECYFTNGTQRIRYVTRYIYNREEYVRYDSVGEHRAVTEL      |
| Q8K1E6 | WTLKSRIEENTSHTFNSLLCNFYRDEKSDVDWHSDEPSLG      |
| Q15266 | SEARVQVWFQNRRAKCRKQENQMHKGVILGTANHLDACRVA     |
| Q8BRX9 | CTGTLGTIHRSCLEHWLSSNNTSYCELCHFRFAVERKPRPL     |
| O89116 | MGKLETDFKRSRIAYSDEVNELLGDAGNSSENQRAHLLDN      |
| A5D989 | AERKFYEQMNGPVAGSSRQENGASVILRDIARARENIQKSL     |
| P0C7Q3 | FQVSFQHPHYLLYYLVSLKNWLNCHSWQRTPVAVTAWALL      |
| Q6PK04 | IPFRLREIMRSRQEMKNPISNKKRKAQVTRFRKLEKEAK       |
| O88452 | IVEMIHFKDLLHEPYVDLVNLLLTCGEDVKEAVTRSVQAQ      |
| Q64695 | QIYLTQFESLVKLVYRERKENVFFPLTVSCSLGCELPEEEE     |
| Q9BQ15 | YSEVPNFSEPNPEYSTQQAPNKAVQNDNSPSASQPTTGPSA     |
| Q9UBX7 | WLLTAAHCLKPRYIVHLGQHNLQKEEGCEQTRTATESFPHF     |
| P68509 | QACLLAKQAFDDAIAELDTLNEDSYKDS'TLIMQLLRDNLTL    |
| O95992 | LATQYMSVWELFSLGFFDMNVTLGCHPLTTLTFHVVNIW       |
| Q17R31 | AKRLNLPVNVHSRSAGRPTINLLQEQAEBKVLHAFDGRPS      |
| Q2KIR7 | ILYMASETIKELTPSLLDVKNLPVGDGPKAIDPEMFKLSS      |
| P28845 | AEQFVAQAGKLMGGLDMLILNHTNTSLNLFHDDIHHVRKS      |
| Q9P0L0 | VLDPPTDLKFKGPF'TDVV'TNLKLRNPSDRKVCFKVKTAP     |
| Q6P9H5 | EEQEAQLRELMEKVEAIMWENEGDYYSNKAYQYTQQNFRLK     |
| Q99LU8 | KSALFEVSEVI PVMTNNEYENILKGVDRDSSYSLESSLELQ    |
| Q80SV1 | YWLFGSQLGKPVSFSTFRRCNYPVRGDGHNLIMVEECGRYA     |
| Q9UEU0 | AGTEKKKLI'IRDFDEKQ'QEANETLAEMEEELRYA'PLSFRNP  |
| P07478 | CYKSRIQVRLGEHNI'EVLEGNEQ'FINAAKI'IRHPKYN'SRTL |
| P62702 | DANGNSFATRLSNIFVIGKGNKPWISLPRGKGI'RTIAEER     |
| P35232 | QKKA'IAISAEGDSKAAELIANSLATAGDGLIELR'KLEAAED   |
| Q0VCB1 | FQSIQEYDSGTYRCDVQLLKNLRLVKRLYFGLRVLP'PNLVN    |
| Q16740 | SPGGVV'TAGLAIYDTMQY'ILNPICTWCVQQAASMG'SLLLAA  |
| A6QP24 | RLKQELMSMKEVGDGLQDMNCMMGALQELKLLQV'TALEQ      |
| P21337 | SISHFTLGAVLEEQATNQIENNHVIDAAPPLQEA'FNIQAR     |

|         |                                             |
|---------|---------------------------------------------|
| Q8VI33  | GSKNILITTNMVSQNTAESANALKRKRREDDDDDDDDDDDD   |
| A4FV27  | RVLLMLFHTVTRIMAEQEVENLSGLSTNPEKDI FVVRENGT  |
| Q2T9T5  | LVGLGCLGDCLGLEWLDLSGNALTQLGPLASLRQLAVLNVA   |
| O43731  | ETITTHYLFFLGLYRALYLANWIRRYQTENFYDQI AVVSGV  |
| P10649  | AYDILDQYRMFEPKCLDAFPNLRDFLARFEGLKKSAYMKS    |
| P21237  | FLTMVISYFGCMKAAPMKEVNVHGQGNLAYPGVRTHGTLES   |
| P62826  | SRVTYKNVPNWHRDLVRCENIPIVLCGNKVDIKDRKVKAK    |
| Q96K30  | GGLHSSRPLKRGLSHSLTHLNV PSTGH PATSAPHTNGPQDL |
| Q9CR02  | LDSNTLQTFREWDFDLKLPNIKMRKLCADDAVPPKRRKQKN   |
| Q5T0U0  | DFEEHMIKYNAYYAKIKAHKNSLGEVESKWSFMTELHEKRD   |
| Q9H1R2  | RIPVADTPEVPIKHFKECINFHCCRLNGGNCLVHCFAGI     |
| Q9H2C2  | SCQYRCIECNQEAKELYRDYNHGVLKITICKSCQKPVDKYI   |
| O95473  | TFFSILVWIFQAYLAFQDLRNDAPVPYKRFLEDEGGMVLTTL  |
| A6NC51  | LWTGLL CALGTSVVGNFQEKQRPTHLAGAFLAFLILGNVYF  |
| P45880  | GTLETKYKWEYGLTFTEKWN TDNTLGTETIAIEDQICQGLK  |
| Q96S79  | NGHVHDLQILDFFPISAFPVNTLQEWADTCCRGLRSVHAYI   |
| Q9D0M0  | HTDILVGVKAEMGTPKLEKPNEGYLEFFVDCSANATPEFEG   |
| P09012  | PQQMLPGQMPPAQPLSENPPNHILFLTNLPEETNELMLSML   |
| P56857  | IISGICAIIGVSVFANMLVTNFMSTANMYSGMGMGMVQ      |
| Q9NQY0  | QIQKTVIEFLKKFGSVFPSLNMAVKRREQALQDYRRLQAKV   |
| P19075  | FQHYPELCACLDKQRPCQSYNGKQVYKETCISFIKDFLAKN   |
| Q969J5  | QSTHESLKPQRVQFQSRNFHNLQWQPGRALTGNSSVYFVQ    |
| Q6ZUJ4  | ENWRKENLRKDMERDLKADSNMPLNNSQEVTKDLLDMIDH    |
| Q96MW1  | EKDDSGATTMNIGSKLLFRNTNVEDVLNARKLERDSL RDE   |
| A5D7A0  | SRRLQMEGEGGGAPEQPGLNGAAAAAAGAPDETAEALG      |
| A4QP B2 | PEMGLTYWIDWGENPEIKRANLDRQELRVLVNASLGWPNGL   |
| Q01730  | PPELGNLDLTGQKQVFAENNPWVTP IADQFQLGVSHVFEY   |
| P62079  | QQIVIYTRGCVPFQFEKWLQDNLTIVAGIFIGIAL LQIFGIC |
| P19437  | RLELIQTSKPYVDIYDCEPNSSEKNSPSTQYCNSIQSVFL    |
| Q9JL59  | EHEVSVNRGSRVVMACNISNNLRDVTIELVTSEKTSIIFNH   |
| Q9CPY3  | VPDVHTVRRSPRISFILEKENNPPLKVPTKEDLFKTC SVPG  |
| Q0P5E2  | CEALNRSVQVVNLDPAAEHFNYSVMADIRELIEVDVDMEDS   |
| P40337  | EPSQVIFCNRSFRVVL PVWLNFDGEPQPYPTLPPGTGRRIH  |
| Q9NVX0  | FVNFTRLQQITNIQAEIYQKNLEIELLKLEKDTADV VHPFF  |
| Q6ZSR6  | LPKCWDYRHEPPRLAPLLIFNPHPSTVLS CNCEYNSFFFC   |
| Q8VC04  | VRPVGLNSSTVTFEDAHVQLNTTNV LNIFNSNFYPI TVTQL |
| O95926  | EQLRKRFR ELHMRNEARKLNHQEVVEEDKRLKLPANWEAK   |
| Q86UD7  | RAGAAVDLGHEQVDVRKYTNNLGIVHEMELPHVSALEVKQR   |
| Q1JQA7  | QEAPSSCLESSLAEIFPLGKNCASTFNSDSGTPGLAASVLV   |
| Q3T0Y9  | TLTAGQPREAGEEEQDAVTNRAAARRLAHLLLVLLIIL      |
| Q08DM6  | QYQSCRVVGSVASAGPDGARNEPLQQLLDPSTLQQSVESRY   |

|        |                                             |
|--------|---------------------------------------------|
| P58417 | ESSKDLSTSRLLSQTFRKGENDTDLDLRYDTPPEPYSEQDLW  |
| Q9H2W6 | TAERTLATLSENNMEAKFLGNAPCGHYTFKFPQAMRTESNL   |
| E1BC52 | RLGTVERPRGGGGFFGHQNRAEAKENLRSAETFEKEDDL     |
| Q9P2W1 | GRAEAAAAGAAGILLRRLQEQRNPYSSQDVFGNLQREHGLGK  |
| P49427 | RTILLSVISLLNEPNTFSPANVDASVMYRKWKESKGDREY    |
| P55918 | TYHSGQKFSTFDRDQDLFVQNCALSSGAFWFRSCHFANLN    |
| P09038 | LLASKCVTDECFERLESNNYNTYRSRKYTSWYVALKRTG     |
| Q5JBG6 | IPFSTFMESDLIGVIHPGYKNRISILYPWERKNATCYLGY    |
| Q2TA03 | EFPFKPPSIYMITPNGRFKCNTRLCLSTDFHPDTWNPWS     |
| Q8TAE8 | AECMAKMPQMIWNWQQQRENWEKAQADKERRARLQAEAEQ    |
| P0C0E4 | QAQAYAERLGVTFEVSPLCNFNIIESFTELARIVLLRHRL    |
| Q1LZC0 | RLGKPKGGISRSSSQGVYENQRKTGRQRQWGMTVRFDS      |
| Q6PZD9 | KGKKAVNKDSLEYRLRRERNNIIVRKSJKAKRRIMETQQK    |
| P15945 | AQHRLVSKAIPHPDFNMSLLNEHTPQPEDDYSNDLMLRLK    |
| P30041 | VFGPDKKLLKLSILYPATTGRNFDEILRVVISLQLTAEKRVA  |
| Q0P5H5 | SSKAKKIYDFIEKEAPKEINIDFQTKSLIAQNIQEATSGC    |
| P51164 | GTFSLHYFPYYGKKAQPHYSNPLVAAKLLNIPRNAEVAIVC   |
| Q3UBZ5 | REQLRACSLQGWVCYVTFICNIFDYLRVNNMFMALVNVFY    |
| P02720 | KECSGETVVYVQVKYFPFMSNRDYVYVRQRQELDFEGQKVH   |
| Q9CQT2 | SFHADQLGFSPSAQPHGHTFNQSSSQWRQDALSSQRKRQN    |
| Q96FV3 | LQNLIDFAQEYWSCCGARGPNDWNLNIYFNCTDLNPSRERC   |
| Q16637 | SDLLSPICEVANNIEQNAQENENESQVSTDESENSRSPGNK   |
| Q8IZS5 | RTLAAHQKQFRLPASAEKPGNEYGRNYFDPLMDEEINPRQC   |
| Q8BXX9 | HRTNNERSYIAEMTQVSGSNQVSKRQMDPLPRMKESPVK     |
| Q92876 | GDSGGPLVCGDHLRGLVSWGNI PCGSKEKPGVYTVNCRYTN  |
| Q8VI64 | SVPESTQEVESAAPDQDDVCNEGADTSQEGADTSQEGADTS   |
| Q8NI29 | PDPIPQWNNACLHVTHVFSNIKMGVRFVVSFEHRGQDTQFW   |
| Q8N755 | TWSLSSYTCATRIITTLMTTNDFTILLRFVIMLALNIWTV    |
| Q9DB05 | VEKATAHYEQSADYKGEESNSSANKCLLKVAGYAAQLEQY    |
| Q03401 | KCTFSHSPIELRTTNLRGENLFMSSYLASWSSAIQGWYNE    |
| Q92730 | AFTSEKSIHSIFRTASMLCLNKPSPLPQKSPVRSLSKRLH    |
| Q6PHN7 | MFFYHFSFLQILGLVTEVNLNMLCPAISDPFYGPWYRIWA    |
| Q9UBX7 | ATESFPHPGFNNSLPNKDHRNDIMLVKMASPVSIWAVRPL    |
| P52943 | SGPPKGPSRASSVTFTTGEPNTPRCCKKVVYFAEKVTSLGK   |
| Q9DAK2 | LLPYRQILPILNIFKNMNVNSGDGIDYSQQKRENIGDLIQ    |
| A4IFA7 | LSCDVAKEHDVQNTFEEIEKNLGRVNFVNAAGINRDNLV     |
| Q99M71 | CQAPQQWEGRQVLYQQSSGHNNRALVSYDGLNQRVRLDER    |
| A2AUU0 | HPVAPLGSRIITDPAKVFEHNMWDHMWQSKEEDAARKKVE    |
| Q96L16 | ISRLEPVTKTKPWREPLWERNWQGHLDNRGYLAGPREDG     |
| P04768 | SHNISIEVSELFNEFEKHYSNVSGLRDKSPMRCNTSFLPTP   |
| Q96DN0 | GVSFGISTDSEVLTHYNI TGNTICLFRILDVNEQLNLEDEDI |

|        |                                            |
|--------|--------------------------------------------|
| Q7L4S7 | CNSFLQQAGLNLISMTVINNMLAKSASDLKFPLISEGSGC   |
| P52840 | LSLLPQSLLDQKIKVIYVARNAKDVVVSYYNFYKMAKLHPD  |
| P60033 | TLDCCGSSTLTALTTSVLKNNLCPSGSGNIISNLFKEDCHQK |
| P79125 | TGVRIRNVQVPDITFEATSSENSANVLIPITADVTVSLPFLG |
| Q9BYN8 | VLAERKALKDAAEHRELMAWNQAENRRLHELRIARLRQEER  |
| Q8N5S3 | HHSKSHVGRGRIYYAKFINTNARTYNEFPFYIDPKKGPEIQ  |
| P30405 | ENFTLKHVGPVLSMANAGPNTNGSQFFICTIKTDWLDGKH   |
| P30041 | NAYNCEEPTEKLPFPIIDDRNRELAILLGMLDAPKDEKGM   |
| P23889 | IFSSISKRSIGAIEANQGLFNYPVKPIDTIARALLETLI    |
| Q17QN8 | LLQVQDHDQPIPWKVQFNLGNSRSPSNQCRNSIQGKHLITD  |
| Q5S2D4 | QGLQSELYDVSKAVANSKQLNIKLTSFKAVHFSVPVSSLPDT |
| Q8WUN7 | HDSSGSLNENSEGTVGALGRNQPLKKEKPKWKS DYPMTDGQ |
| Q96PB8 | NQITSIPNEIFKDLHQLRVNLNSKNGIEFIDEHAFKGAET   |
| Q9DAT2 | SPEVEVCLFHAMLGHKPVGVNRHFMICIRDKFSQNIQRVQ   |
| P52803 | NFDGYSACDHTSKGFKRWEENRPHSPNGPLKFEKQFLFTP   |
| O15520 | GSKEFNNDCKLKERIEENGYNTYASFNWQHNGRQMYVALNG  |
| Q9UGN4 | GPVGGSLSVQCPYEKEHRTLKNYWCRRPPQIFLCKIVETKG  |
| Q8IUH2 | TGIPFFYMTAKDPVVADLMKNFMASLMLPESEGEFCKRNIV  |
| Q9D819 | IPQTWEDPGHSDKHTGCCGDNDPIDVCEIGSKVCARGEIIR  |
| Q96BS2 | LHRRFKQLSGDQPTIRKENFNVPDLELNPIRSKIVRAFFD   |
| Q2KIP7 | PELNQYIQDTLHCVKPLLEKNDVEKVVVVILDKHEHRPVEKF |
| Q4KUS1 | CPRQRLECRNESLSSCKTDFNCKAHFKCCQFACGRKCMDPY  |
| Q3SWY4 | RAELKGLNPGGAYVVCVVAANDAGESRAPGGAEGLDSADG   |
| P60191 | QASHESIEDSMNSYGSEGNLNYGGVCLASDAQFSDFLGS MG |
| P17981 | MSYPAGFHDFHGTALVAYTGNIHRSLEATREFKINPGNFH   |
| Q9S169 | HLADGMTVGELECAAATMSDNSAANLLLATVGGPAGLTAFL  |
| Q5NCY3 | MDQTLLENGIRDEEEEFDYLNMDGKLTFAIILLYFNDDLTE  |
| Q99LD8 | DGTDVLFRTGREFFVGLSKWTNHRGAEIVADTFRDFAVSTVP |
| P05839 | YINLPMVVPVPSWAHPETASNTMHAMASRGYDYPVDFPRLI  |
| Q3SZ48 | QSLINLDGKLGHVVKCTVCNEATPIKNPPAGKKYVRCFCN   |
| Q9Y5X0 | RIQKEDFWHSYIDYEICIHNTSMCFMTMTSCVRRRYREFVW  |
| Q13907 | AQSDGIWGEHEIDYIILLVRKNVTLNPDNEIKSYCYVSKEE  |
| Q28151 | QKQYVIKHQNTHTGEKLECECGKSFSQKENLLTHQKIHT    |
| Q9UBP6 | IRALRAAPAGGFQNIACLRSNAMKHLPNFFYKGLTKMFFL   |
| P35282 | NWVKELRMLGNEICLCIVGNKIDLEKERHVS IQEAEASYAE |
| P25401 | KGAEEGISLQSRPDGRTMLVNTTPYIFAIGSLDNGGKKIA   |
| Q9D7L8 | ENYILDQHGVSASLECAVQNHTEDEELWYREDGIVDLKN    |
| P24071 | LVLVALLAILVENWHSHTALNKEASADVAEPSWSQQMCQPG  |
| Q9D9B0 | TFWKYRTFWKEDKAFWREDNALWERDRNLIQEDKALWEEE   |
| Q96DX5 | TASEELACLMDFGADTQAKNAEGKRPVELVPPEPLAQLF    |
| Q95JH2 | ILFLAVLAI PVC AVRGRNVENMKILRLMLLHKYLYGIRVE |



|        |                                             |
|--------|---------------------------------------------|
| Q3ZBP0 | NNFTSIKFTQRNEPNDCLSNKAIPLHTSSQCSEEEQIMIG    |
| Q2NL23 | DAGQVGPAAAEFRRQSPPSKNQRERARSGALPLGALYTAAA   |
| Q0V7M7 | DVEHLKENIPPHLPQVTVTQNFVNGSDLDPEEPVKVEEFAP   |
| O14753 | HMKCHNDVKRHLCTYCGKGFNDTDFDKRHRVTHTGVRPYKC   |
| Q2NL11 | SITEAVTILGNKLRDYQGQFNTHLLALCDYFHNTFIRHYK    |
| P45379 | RKRMEKDLNELQALIEAHFENRKKEEEELVSLKDRIERRRA   |
| Q4G0S7 | DQSSEGCMMKISSVNLDKLINDFSQIEKKMVETNGKNNILD   |
| P60033 | LAGGVILGVALWLRHDPQTNNLLYLELGDKPAPNTFYVGIY   |
| Q28030 | RYYEQPDNGVNLNYPKRACQFNRTQLGDCSGIGDPHTHYGST  |
| Q96FF9 | VPAVQSPRRSPRISFFLEKENEPFPGRELTKEDLFKTHSVPA  |
| Q9NV56 | SPEVEVCLFHAMLGHKPVGVNRHFHMICIRDKFSQNIGRQV   |
| Q9D1G1 | TTAKEFADSLGVPFLETSAKNATNVEQAFMTMAAEIKKRMG   |
| P25322 | ISNPPSMVAAGSVVAAMQGLNLGSPNNFLSCYRTHFLSRV    |
| Q2HJ1  | ESQLGLWGGEGWLKGHRYVNNDFSKRVKVKVWKPQLFQREL   |
| P13760 | NSQKDLLEQKRAAVDTCRHNYPVGVESFTVQRRVYPEVTVY   |
| Q3SZC6 | NRICGGLDMLAEKLPNLTHLNLSGNKLDISTLEPLKKEC     |
| Q9BQ24 | FYDKQLKVLVLSGATFLVTFGNSEKPEMTTCRLSNNQRYLFL  |
| Q8CAK3 | NRREPHVPGTSCAHPKSRKQNLHPKVLHPSNPHISSGSTVA   |
| Q9NY30 | PKEMTIWVDPFEVCCRYGKKNHFFTVASFKGRWEWELYQQ    |
| Q96S90 | SIFLKKTYIPILTEPRDLFNGLDSEEEKDGEEKVHPSNSE    |
| Q3SZX8 | ANSIQGCKMNNVNVVYTPWSNLKKTADMVGGQIGFHRQKDV   |
| Q2TA24 | HRNYHAGYSMFGAGLTVGLSNLFCGVCGVIVGSGAALADAQ   |
| Q99714 | TIAPGLFGTPLLTSLPEKVCNFLASQVFPFSLRGDPAEYAH   |
| O15247 | QVDPEIELFVKAGSDGESIGNCPCQRLFMILWLKGVKFNV    |
| P22615 | IYLISRAVNQFPEFRMALKDNELIYWDQSDPVFTVFHKETE   |
| P19071 | WRKTAPKYGFRTELMPVRSNSEGIGRYVGVYISKGIESRT    |
| P79391 | ETLAHKLDEKSKKLMELHRQNLNLQEVLEKAAANSYSGPCFQD |
| Q3SZW3 | VTMTSNTDASASCQYRCIECNQEAKEYRDYNHGVLKITIC    |
| P28069 | HFGEQNKPSSEIMRMAEELNLEKEVVRVWFCNRRQREKRV    |
| Q58DS9 | TDTFARAKNWVKELQRQASPNIVIALAGNKADLASKRAVEF   |
| P23025 | EFDYVICEECGKEFMSYLMNHFDLPTCDNCRDADDKHKLI    |
| Q8BMB3 | SDFHLFKGKIPMWEDDANKNGGKWIIRLRKGLASRCWENL    |
| Q2HJ38 | QVQSTLLALASMAKTGKNKVNVGKYAEKQERRFEPEKLRE    |
| Q9QZ28 | KRELAQATGLTPTQVGNWFKNRRQRDRAAAANKRLQQQVLS   |
| P63011 | GQKESDQNFDMFKILIGNSSVGKTSFLFRYADDSFTPA      |
| P29084 | QHLDIGLKQKQWLMTEALVNNPKIEVIDGKYAFKPKYVNRD   |
| Q8BK84 | PGAFELERLFWKGSPOYTHVNEVWPRHLIGDEATALDRYGL   |
| P62906 | GNQRKRRKLETVELQISLKNYDPQDKRFSGTVRLKSTPR     |
| Q1JQA7 | LSRSELTSVSPNTGMTVFIILNFEKGGKGRPTAQCVCVNLQG  |
| O14925 | LLYSAFGVIIEKTRGAEDDLNTVAAGTMTGMLYKCTGGLRG   |
| P04481 | YAHALYQLTQCPVPVDSKLERNTLTALLNVASWLKRPKGTPE  |

|        |                                             |
|--------|---------------------------------------------|
| Q3UZ26 | ISTYPKSGTTWVSEILDLYNNGDAEKCKRDAIYKRVPFME    |
| Q5TA50 | EGLRTPEDARTSALCADSYNASLAAYHPWVVRRAVTV AFC   |
| P32972 | TLKSTPSKKSWAYLQVSKHLNNTKLSWNEDGTIHGLIYQDG   |
| Q9DCH6 | NRCFCRKKVGLTGFECCRGVYCGVHRYSDVHNCSYNYKA     |
| A6NFK2 | YGGRDQHDRPLVEAESTLPQNRYTQEGDIPEDSCFHCRCSSG  |
| P25444 | KQTRAGQRTRFKAFVAIGDYNGHVGLGVKCSKEVATAIRGA   |
| Q96NT3 | KGYKNQSFYRKHFDEETRVNQLFAQAKACKVLVEKCTVSV    |
| O15305 | KVQEQLGNDVVEKYDYVFPENGLVAYKDGKLLCRQNIQSHL   |
| Q3V2J0 | RLRDKADQLVKQLIDFANTENPELRATIRDF AEDLAKVQDY  |
| O43708 | KQVGEEMQLTWAQNAITCGFNALEQILQSTAGIYCVGDEV T  |
| Q9Z2F7 | ENGNKNGGLEHVPSSSSIHNGDMEKILLDAQHESGQSSSR    |
| Q3SZU4 | HLYSPFFDTCHAFDQRTGHKNKVIIMTFHSGFKIKTFFTTSG  |
| Q32LNO | SMSLQEFTRAAGTAGQLLYSNLQHLKWNQCSSDLFQSTHN    |
| Q9BRK0 | RDKSYETMMRVGKRGLNLAANAATAAAKGV LSEKLRFSFM   |
| Q9DCC4 | NLPCVVQEGAMVMARGHHAGNDDAELLQNLLEACGQCIEVP   |
| O18870 | DFKRETCVVVYTGYNREEQNLSDLLSPTSEVANIEQNAQE    |
| P62577 | HDDFRQFLHIYSQDVACYGENLAYFPKGF IENMFFVSANPW  |
| Q9P299 | EIVDGGVILES DPQQVIQKVNFRADDGGLTEQSV AQVLQSA |
| P18124 | EYRQMYRTEIRMARMARKAGNFYVPAEPKLA FVIRIRGING  |
| P56856 | SGIMFIVSGLCAIAGVSVFANMLVTNFWM STANMYTGMGGM  |
| P68250 | RYDDMAAAMKAVTEQGHELSNEERNLLS VAYKNVVGARRSS  |
| Q7TSP5 | IGFGISGKHFITVTTFTSAGNIGEDGTL SCTFEPIKLNIGI  |
| P45879 | FGIAAKYQIDPDACFSKVNSSSLIGLYTQ TLKPGIKLTL    |
| Q3V038 | SSRLSEEQSKTVEAIEIDCYNLSLAAC LLQAELVNYERVKEY |
| P51150 | SPRDPENFFVVLGNKIDLENRQVATKRAQ WACYSKNNIPY   |
| P79107 | TADPSKAVLLDPQWNHVLTDNRVTLKCG DY PVEDNSTKW   |
| P26717 | YYIGKERRTWEESLLACTSKNSSLLSID NEEBEMKFLASILP |
| Q8N4E7 | PSRVRQNFHPDSEAAINRQINLELYASY VYLSMAYYFSRDD  |
| Q1ZYI8 | PGYFPNELRNI FREQVHLIQNAIIESR IDCQHRCGIFQYET |
| Q5EBJ4 | DEQPVFGKKGDIARNSYSRYNTISYRK IRKGNTRKQRIDEFE |
| Q8C4B4 | GPGGLVAGKEEKKKAGGGVLNRLKARRQ PPHTPDDGSGAA   |
| Q9JM71 | IGGFKCKNSQPWHVAVLRSNKYICGGV LLDPNWVLTAAHC   |
| A6QLZ5 | VNASGAAAASAFRESAQQMSNERGFEN VELGVIGKKKVPVR  |
| Q3SZM1 | LFREWHMPFKRPSYPAVKRYNQNRSLV QKLRMEERFKKKEK  |
| Q8K3B1 | DDQSWGWNLVDNLLHNGEVNGSFPQC NNAPKYQIGERIRV   |
| P30932 | LSVGLWLRFDSTKSI FEQENNDSSFYTG VYILIGAGALMM  |
| Q9BRN9 | VKPSVTCVDQDFKSQKNFIINMTCRC FWCQLPETDYECTNST |
| Q9D142 | GVQKSWDFMKT HDSVTILMFNSSRRSLVLVKQFRPAVYAGE  |
| Q6P8Y1 | EEAEELFQRFDRDGGSGTIDFNEFL LTLRPPMSRARKEVIMK |
| Q32L00 | RLTAWYGELPYTYSRITMEPNPHWHPV LLMKLNQIEENTGH  |
| Q9D8B3 | QLAQIDGTLSTIEFQREALENANTNTEV LKNMGYAAKAMKA  |

|        |                                            |
|--------|--------------------------------------------|
| A5PJT0 | ERLIELVDRGLVEKVLPGHFNTFGAERLFRLASNYISKAGI  |
| A6QQ24 | GLARLRHQFLFLCFSAGNYNQGEIRKKELLQSCDVLGIPP   |
| P04228 | LLGQPNTLICFVDNIFPPVINITWLRNSKSVTDGVYETSFL  |
| Q92527 | GQSLSLVEKLLLEYEADLEAKNKDGYTPLLVAVINNNPKMVK |
| P08760 | SRITKHFELKHLSSGDLLRDNMLRGTEIGVLAKTFIDQGKL  |
| Q9NY12 | PCEDDIVCKCTTDENKVPYFNAPVYLENKEQIGKVEIFGQ   |
| Q9BRQ6 | SFGVDEEERVRVLQGVRLSENVVNRKPESSPPAPTSTF     |
| Q1RML7 | LGKQFCSEFKIRTKTQSFRCRNEYSLTGLCNRSSCPLANSQY |
| Q12918 | IGLNFSLSEKNWKWINGSFLNSNDLEIRGDAKENSICISISQ |
| Q3UPL6 | THFGCQATRAQTNASVIFLPNAFGTDFNIPSPAVSPPPAYD  |
| Q6PEY0 | LVYMVAAEHVWKDEQKEFECNSRQPGCKNVCFFDDFFPISQV |
| Q7Z7J7 | LAFVLGNRQTDLLQEELKPENKDFVGSTVSSVLRPGGDVSG  |
| Q92564 | LQEWLKGMTSLQCDTTEKLRNTLDYLRSLNDSTNFKLIYR   |
| Q9Z084 | GLLMLVPLSWVTHNIHGFNPLLGFSKVKMGSSLSLAWT     |
| Q6NXY9 | EDAEQEDYDEEEQEEENDYINSYFDNGDDFGVDSDDNMDEA  |
| Q9BXJ5 | AIGLVHNGQYRIRTFDANTGNHDVASGSTIILALKQGDEVWL |
| P47753 | THAPPGEFNEVFNDVRLLLNNDNLLREGAAHAFAYNMDQF   |
| P20456 | LLVTELGSSRTPETVRIILSNIERLLCLPIHGIRGVGTAAAL |
| P23774 | AEEMHISEISVRKRLEQECLNFNQLILDVRMNQAAKFIRS   |
| O75828 | IRALRDFLRKEYGGLNVLVNNAAVAFKSDDPMPFDIKAEMT  |
| Q9D7D7 | LSGVVFFVAGLFSFLIPVSWYNHFLSDPDVLAAPSSPVTQVQ |
| P47756 | QPLKIARDKVVGKDYLLCDYNRDGDSYRSPWSNKYDPPLED  |
| P20764 | VDGVVPTQGVETTQPSKQTNNKYMVSSYLTLISDQWMPHSR  |
| Q6UX27 | AEFLSLLCLGLCLGYEDEKKNKPKPKPSLHAWPSSVVEAES  |
| Q2T9Y1 | ALSKKVKPPKECFLIQPKETNEDATKTRKRKKKKITDILAK  |
| Q3ZBM6 | EGNQESEEDDTGPPARKLRNQQDDDDDDDEGFFGALPPG    |
| Q60651 | HELKEFLKHHNNCSIMQSDINLKDELLKNKSIECNLLLESLN |
| Q8BWP5 | KIAAVLTDSFPLKVRGIHLINEPVIHFHAFVSMIKPFLTEKI |
| P24668 | QDLGNLVADGCDVCRSKPRNVPAAYRGGVDDQLGESEER    |
| Q2NL33 | MTYATLTFQDSVAAGNNQDRNNLRKRGYPAPSSIWRQAALG  |
| Q96EU6 | FDDLSEYNEPVFDKTYQFLNDIRAKEKELVKKQLKKHLSG   |
| Q8TAK6 | QQQLRRKINSRERKRMQDLNLAMDALREVILPYSAAHCQG   |
| Q3KNV8 | PEEDNDYHRSDEQVSIACLECNSSKLRGLKRKWRCSAQATV  |
| Q8TDN7 | LGSGYSIWMPCYFSPFLGGNRSQFIRLVFITTVVSTLLSF   |
| Q8IWP9 | KRRSPKSFSAHCTQVNAKKNAPVSKSTGFSNPASQSTSQ    |
| P14206 | TIALCNTDSPLRYVDIAIPCNNKGAHSVGLMWWMLAREVLR  |
| Q08331 | SGYIEANELKGFSLDLLKANKRYPDEPKLQEYTTITLRMFD  |
| Q00356 | SGGPLLCAGVAHGIVSSGRGNAPPAIFTRISPHVPWINRV   |
| Q0IIC4 | RKEGNEYKMPNRRNMYAVQNNASAGPYFNPRSRQRIPRDLA  |
| P00918 | LKEPISVSSEQVLKFRKLNFNAGEPEELMVDNWRPAQPLK   |
| Q0VB26 | IRPKSTRRLGFTYSIGDPILNESQYHDEYTWKLRSKENMVK  |

|        |                                                |
|--------|------------------------------------------------|
| P41247 | LYVNI AKQDIMLSLANLVRLN QALFP PPSKRK MESLYQCGFD |
| P11672 | QP DFRSDQFRGRWYV VGLAGNAVQK KTEGSFTMYSTIYELQ   |
| Q8IUA0 | LPV RHGNCNHEAQRWHFD FKNYRCTP FKYRGC EGNANNFLN  |
| Q62189 | ATIATMPVPETRANHTIY INNLNEKIKKDELKKS LYAIFSQ    |
| P20489 | DSGKYICQKQGLFKSKPVYLNVTQDWLL LQTSADMVLVHGS     |
| Q14966 | SMTRLYYRDASACVIMFDV TNATTF SNSQRWKQD L DSKLTL  |
| Q80ZQ3 | VVRHEQQVAELSTAEVEK RANVLM LKETLRMEQA QMLQKAF   |
| Q9BTT0 | KINLELRNRSPEEVELVLDNCLCVNGEIEGLNDTFKELEF       |
| Q4VAA2 | VDYSGLRVQAMQISEKEDDDNEKREDPGDNWEEGGGGSGAE      |
| A2VE33 | NETFHFESQCCLGEP CNQTSNTTASPHQV GSGNMECPACYG    |
| Q9NVP2 | LNPELRENPPMKPDFS QLQRNILASNPRVTRFHINWDNNMD     |
| Q86UD1 | AVRQAE EVRGLEHLHMDVAVNFSQGALLSPHLHNVC AEAVD    |
| Q91ZW7 | QLKSEVDRLCRLCPWDWTF FNGNCYFFSKSQRDWHDSMTAC     |
| Q8BHD0 | QLWDTAGQERFRSITRSY YRNSVGGFLVFDITNRRSFEHVK     |
| P54107 | RVVP PASNMLKMSWSEEA AQNARIFSKYCDMTESNPLERRL    |
| O88992 | TYHVLMRGGDGTSMWADLCKNGQVRASAI AQDADQNYDYAS     |
| P70447 | GAKTAETVQRIKKTRRLKANNRERNRMHNLNAALDALREVL      |
| Q59I47 | LRLNDELRLQLQFSELVGI VYNPVEYAWEPHRSYVTRYCQGP    |
| O14668 | STRLSNCDPPPTYEEATGQVNLQRSETEPHLDPPPEYEDIV      |
| Q86W74 | KLETMQTA ESESAMESHSL LNP LQQGEGV LSSFR TTWQEF  |
| Q9WTP7 | PRTL PQAEALDKVYQIDTVINLNV PFEVIKQRLTARWIHPA    |
| Q32L35 | EELRCRDAFYKEQLGR LERQNLEAYRLSSQQFHEAATKIEG     |
| Q8R5M0 | ITDNGAGYAFIKRIKEGSI INRIEAVCVGDSIEAINDHSIV     |
| O15217 | LSLADVILLQTILALEEKIPNILSAFPFLQEYTVKLSNIPT      |
| A5D7K7 | QFGYVYGMSAIGCLGIHALLNLMS SSGVSYGCVASVLGYCL     |
| P04183 | LVIKYAKDTRYSSSFCTH DRNTMEALPACLLRDVAQEALGV     |
| P31944 | FLKGEDGEMVKLENLFEALNNKNCQALRAKPKVYI IQACRG     |
| Q64704 | IRKSQHSVLSRKFVEVM TKYNEAQVDFRERSKGRIQRQLEI     |
| Q99P30 | DAKARLRKSDV GTRYSHLSSNKFSVLVPLLARGGKLYLMFT     |
| Q2KI22 | SIRPDELLHMELVLVNKLKWNLAAMTPHDFIEHFLSKMPVA      |
| Q99811 | TVPPYSPGSSGPATPGVNMANSIASLRLKAKEFSLHHSQVP      |
| Q9Y3B8 | LDIEKDQIEMACLITDS DLNLAEGPNLIKQPDEL L DSM      |
| Q9D5L7 | GVATADAPLHSVGYTTLVGN NHESWGWDLGRNRLYHDGKNQ     |
| Q8N5M1 | QDTIKYYTMHLTTLCNTSLDNPTQRNKDQLIRAAVKFLDTD      |
| Q9CRA7 | KKIPWSCDSRYFWEWLNTVFNKVDYERLRDVGPDRAASEWL      |
| Q8K201 | SENPPNNAVSSPVVVTAPGNHTSPSVSQISTTLPASAEK        |
| O75832 | RDEIVKALLGKAQVNAV NQNGCTPLHYAASKNRHEIAVML      |
| O08738 | ADRDNLTRRFSDLGF EVKCFNDLRAEELLLKIHEVSTSSHI     |
| Q9CQ89 | FIEKFETHLETVKNSPHLDANLQMSKALAKMDI LVNKTEE      |
| Q0VCV7 | AKTPARPVTSEPKSANLCGNRTY GKALMPVARISVKAPT       |
| P15483 | SLKTL CVRGIPPKQGD L WANN EKEFVGMKLNVSINTCIKLI  |

|        |                                             |
|--------|---------------------------------------------|
| O95976 | CLDGCKSEADKFTVREALKENQVSLTVNVRTSNDSDAIYICG  |
| Q0P5F2 | KTSESTSSLHTPFLKALKTQNFKEPPFCSLLEQPNIVHDLF   |
| Q13253 | RRKLQMWLWSQTFPCPVLYAWNLDGSRFWPRYVKVGSFCFSKR |
| Q727J7 | RNSRAIGVLWAIFTICFAIINVVFIQPYWVGDSVSTPKPG    |
| Q6S5G4 | LLLGTAIESAWSDEQFEFHCNTQQPGCENVCYDHAFPI SHV  |
| Q86YB7 | PDQGITEILMNRPSARNALGNVVFSELLETLAQLREDRQVR   |
| Q9H560 | AVHCQEEACAIILLEHGANPNIKDIYSNTALHYAVYNKGTS   |
| Q70YC4 | ESVSTSQSRNISLLTLGQLQNCVIGKLTIIDLLEHLLGVR    |
| Q9EQ48 | YCSVYIRNAFFSEIGIGISANSCLLLFHTFMFIRGHRPRLT   |
| P63162 | DKHMNLILCDCDEFKRIKPKNAKQPEREERKVLGLVLLRGE   |
| P14106 | VRGRDRDSMQKVVTFCDYAQNTFQVTTGGVVLKLEQEEVVH   |
| P05531 | LKLSKCSQSQTLEAIKDMHENYMEGLMNETNYYNMLFDVD    |
| Q3SZ72 | GHVNLLLGAVLHGTVLRHVANPRGAVTPEYTTANVISVSGS   |
| O35885 | VPREHFSCAAPELVAGAQLNASLMDGGALPRLMPTSSGVA    |
| P70202 | STEDTWYKMLKIQTVKVQRNDDFIELDYTIILLHDIASQEI   |
| P22005 | YGGFMKMDLYPMEPEEEANGGEILAKRYGGFMKKDADEG     |
| Q9NPC6 | FKVPDFELLLLTPRFMSFVNPLSGRRSFNRTPKGWISENI    |
| Q148M8 | LSRVERGQRFLAADGDSTRPNGSWAFAQRPTQEMRARKAA    |
| O70552 | SREAQIIPKVNNPKSVYQVENFKQSLQPWFCLPRRKHLDG    |
| Q0II6  | EVLSDAKKRDYDRYGKEGLNGGGGGSHFDSPFEGFTFR      |
| P30932 | DCCGLTGVPEQFLTDTCPPKNLIDSLKTRPCPEAIDEIFRS   |
| P49427 | SILHPPVDDPQSGELPSEWRNPTQNVRTILLSVISLLNEPN   |
| Q9HBM1 | EIRKIYGEKLQFIFTNIDPKNPESPFMSLHLNEARDYEVS    |
| Q3U1J1 | IVLEDDGSQGTDVPTPGNAENEPPEKEGLSPSQRTTATLDP   |
| Q5KR48 | EKLEQAEKKATDAEADVASLNRRIQLVEEELDRAQERLATA   |
| Q9DAS2 | GCFPTIFSPNSPLVLTDNSQNWDRWLHQPTYRSRNSQDNGRT  |
| Q96BH3 | TNEYGGNSLRKPCIFPSIYRNNVSDCMEDESINKLWCPTTE   |
| Q9WU03 | SCGVSKVVGKCRASIPRWWYNITDGSCQPFVYGGCEGNNGN   |
| Q8BGS0 | KVIERAAFPRRLWERVRLSKNYEKALEQIDENLIYWPRFIR   |
| P82979 | VKITSEIPQTERMQKRAERFNVVPSLESKKAARAARFGISS   |
| Q9BZM6 | GRGSWQFLFNGQKFLLFDSNNRKTALHPGAKKMTKEWEKN    |
| Q9QVN7 | GKEEIIARIARRLDKMVTTRKNAEGAMDLLRELKNMPITLHL  |
| Q86T03 | AADGERSPLLSEPIDGGAGGNGLVPGGSGAGPGGLTPSA     |
| Q9H2R5 | WVLSAAHCQSRFMRVRLGEHNLKRKRDGPEQLRTTSRVI PHP |
| Q6PZD9 | AVKEEPRGPEGNRGTSRGSYNPLQYQVAHCGQTAHVHLPPTL  |
| Q3T0Z5 | GGTAAPEEQPEEVDERRRRYNSQFNPQLARRPRRQDPPVAP   |
| P07738 | DQLPRSESLKDVLERLLPYWNERIAPEVLRGKTIILISAHGN  |
| Q6UX82 | VAAVESLSCVQCNSWEKSCVNSIASECPSHANTSCISSAS    |
| O95857 | GQLLEVGNNTASARNDIQRNLNCCGFRSVNPNDTCLASCV    |
| P29965 | GSALFAVYLHRRLDKIEDERNLHEDFVFMKTIQRCTGERS    |
| Q9DC07 | VCKMALNMNYKGYEKKPYCNAHYPKQSFTTVADTPENLRL    |

|         |                                                                              |
|---------|------------------------------------------------------------------------------|
| Q8K015  | QTFSFSARLLYEDPTAALPTNVTVTRPGVEASSPPWEEHRA                                    |
| Q9JJJ3  | IGLLIIVISCSLGLNSGCAMNPARDLSPRLFTALAGWGFV                                     |
| P52797  | YWNSSNQHLRREGYTVQVNVNDYLDIYCPHYNSSGVGPGAG                                    |
| A8E4L3  | GGGEALAVPFEPARLLPLATNGRLYHPAPERAGGVGLVRSA                                    |
| P57729  | DPETVVRLQLWDIAGQERFGNMTRVYYREAMGAFIVFDVTR                                    |
| Q32L15  | DKWSDRHRNCPICRQMGTGANESWVVS DAPTEDDMANYILN                                   |
| P10747  | TGNKILVKQSPMLVAYDNAVNLSCKYSYNLFSREFRASLHK                                    |
| P51157  | KQYKQTIGLDFLRRITLPGNLNVTLQIWDIGGQTIIGKML                                     |
| P58417  | KDSKSFNCRIEYKVKDKATKNTLCNYDPSKTCYQEQTQSHV                                    |
| Q32KY8  | TISIREIEMQLSLGRRPIISNWLDYIPSTRYKDPCELLHC                                     |
| O43557  | QLIQERRSHEVNPAHLTGANSSLTGSGGPLLWETQLGLAF                                     |
| P31041  | KEFRASLYKGVNSDVEVCVGNNGFTYQPQFRSNAEFNCDDG                                    |
| O60487  | TALWPIAAVEIYTSRVLEAVNGTDARLCKTFSSFAPVGDAL                                    |
| Q9NY30  | HSDCPSKGAFCRIRINNNQNKDPIERACVESNVDFSHLG                                      |
| P09631  | ACGSPPVDRKQPSEGAFSENNAENESGGDKPPIDPNNFAA                                     |
| Q61754  | ICDGIHIGITSWGPVPCGKPNAPAIYTKLIKFFASWIKDTMA                                   |
| Q9NX53  | TNGPPWNSLGAPWNTNGPPWNRHGAPPQNSLDAPWNSLGAP                                    |
| Q9BYG3  | GIDYDFPSLILQKTESISKTNRQTSTKGQVLRKKKKKVSQT                                    |
| Q9D8N6  | DLAQFSENTPLYPICRAWMRNSPTVRERERSPGSPLPLPE                                     |
| Q8R173  | RCIRKMDHHCWPVNNCVGENNQYFVLTMYIALISLHALI                                      |
| Q8TDC0  | QEFVSYRDYQSDGRSHTPSPNDYRNFNKTVPVFFGGPLVGGT                                   |
| Q9H0X6  | RKGSSELGFPRVAPEDDEVIVNQYVIRPGFSAASAASAAAGE                                   |
| Q07817  | FVELYGNNAAESRKGQERFNRWFLTGMTVAGVVLLGSLFS                                     |
| Q80WR5  | EEVRASVLQMDSSIFLDDDSNQMPVSRFFGNVELMQDLPP                                     |
| P19404  | ETTPDKLFTLIEVECLGACVNAPMVQINDNYEDLTAKDIE                                     |
| P02741  | DSFGGNFEGSQSLVGDIGNVNMWDFVLSPEINTIYLGPPF                                     |
| Q3Y523  | SVLLYLEKGDQVWLQVYEGENHNGVYADNVNDSTFTGFLLY                                    |
| Q9QY76  | HELKFRGPFTDVVTTNLKLGNTDRNVCFKVKTTPRRCYCV                                     |
| Q925N4  | IGSVWYAVDVYVERSSSLVHNIIFLGIQYKFGWSCWLMAGS                                    |
| P49888  | KEDVIFNRIPFLECRKENLMNGVKQLDEMNSPRIVKTHLPP                                    |
| Q9NQ T5 | VGGSEPASLSYLSFEGATKRNRPNVQVGLIYGQFVVANKD                                     |
| Q80X85  | ALRAPLRWSSLALGVRCVWNLPLGTQVRGSRYAPEFREPL                                     |
| Q9CZB6  | QEGLAPKPPPPKDSYMMFGNQFQDDLIIRPLESQGIERL                                      |
| Q0ZUP1  | LKYEEVDKVVWMMNGSILNTNLLQITGKDEENSCALISQTE                                    |
| Q9ESK4  | CVESLPHMQRNVSVLRELDNKYQETLKEIDDVYEKYYKED                                     |
| Q8WU03  | KEIPFYFHVADNNEKSLQALNNLGFKICPCGWHQWKCTPKK                                    |
| P18124  | ELIYKRGYKINKKRIALTDNALIARSLGKYGIICMEDLIH                                     |
| Q2KHY8  | SRLGSLAQPRHNVECVSPANSYIYQQGCERNLSNWL TNNL                                    |
| Q15773  | MLGMSGGFMDMFGMMNDMIGNMEHMTAGGNCQTFSSSTVIS                                    |
| Q8BG31  | TKTPSRPVGISEPKTSNLCGNRAYGKSLIPPARISVKAPA                                     |
| Q9Y624  | RNGYGT P M T S N A V R M E A V E R N V G V I V A A V L V T L I L L G I L V F |

|        |                                             |
|--------|---------------------------------------------|
| P51159 | FRDAMGFLLLFDLTNEQSFLNVRNWISQLQMHAYCENPDIV   |
| Q5HZI9 | QLYGIKTRDAVLQLRKDGFRNLYRGIPLPPLMQKTTTLALMF  |
| Q9CX92 | LVIVLLPGAIFHLYAACKSINQDCILQKPVYTVIYVLSVLL   |
| Q2PT27 | LSGTEFIGCQFYDRESQKGCNFSRANLKDAIFKSCDLSMAD   |
| Q9CRA8 | SITVVQLQVVS DAGSLLACCLNAACMALVDAGVPMRALFCGV |
| Q6ZVX7 | LELPQRLTWKLLLLRRPLRNLRSNPEGINIYEPAPPTG      |
| A5PJA8 | PMVMMVLP LLIFVLLPKVNTSDPDMRREMEQSMNMLNSN    |
| Q91ZR1 | AWLTDARTLASPNIVVILCGNKKDLDPEREVTFLEASRFAQ   |
| Q95106 | RAQGS LAYPGV RTHGTLESMNGPKVGSRLTSSSS LADTFE |
| Q80XM9 | RRTQNADGFSTHVCLVLLVANILRILFWFGRHFESPLLWQS   |
| O00212 | EMARSVGAVAYLECSARLHDNVHAVFQEA AEVALSSRGRNF  |
| Q9BXY4 | SGFYLHLGKCLDNCPEGLEANNHTMECVSIVHCEVSEWNPW   |
| Q924N9 | CWKS NKWIQVGVVSKGIDCSNNLPSIFSRVQSS LAWIHQHI |
| B1ATL7 | PPALIVGGTKVNNGGTERGSNNARLHVLPQKGFPPRGP      |
| P07203 | LLIENVASLUGTTVRDYTMNELQRRLGPRGLVVLGFP CNQ   |
| O75496 | ALYEALKENEKLHKEIEQKDNEIARLKKENKELAEVAEHVQ   |
| O15247 | RLFLDGDQLTLADCSLLPKLNI IKVAAKKYRDFDI PAEFGS |
| Q60961 | VLVFFVVFIIFKAYLINCWNCYKY INNRNVPEIAVYPAFE   |
| Q61759 | VGGFNCEKNSQPWHAVFRYNKYICGGVLLNPNWVLTAAHC    |
| P51151 | YRSDCCLLTF SVDDSQSFQNL SNWKKEFIYADVKEPESF   |
| Q9NVT9 | LASEIYDILQSSNMADGDSFNEMNSRRRKAQFFLGT TNKRA  |
| O89094 | KGEDEKMVRLEDLFEVLNNKNCKALRGKPKVYIIQACRGEH   |
| Q9QWV4 | FSEPLGRDLLSISDGRGRTHNRERDDGEDSLTHADV NPFQ   |
| Q0VCY7 | GGGGGAPRGRYGPSSRSEN RVVVSGLPPSGSWQDLKDHM    |
| P59095 | SDFLYQTGDRTW DKS LQVYNMVHRIDSDTFICHTITQSFA  |
| Q9CQS9 | AVLKEKHAIRQRLLRPMCQENLPLEAVYHRYVHMLDLAVT    |
| Q9WUZ7 | GDEDNRKWMRENVPGEKKPQNGIPLPPQIFNEEQYCGDFDS   |
| Q93015 | LTLEPVHRRPEL LDACADLINDQWPRSRTSRLHSLGQSSDA  |
| Q5E943 | GRHPHSLMGKNFRSYLLDLRNTSTPFKGV RKALIDTLLDGY  |
| Q9CY28 | NNLKR TFLLVDSVVGITKLDNIAIEMCEEFALPYVMILTKI  |
| Q3MHR2 | GQSLELDGIIYLRATPEKCLNRIYLRGRNEEQGIPLEYLEK   |
| Q9NNZ3 | MLAGMGLHYIAFRKVKQMH LNFMDKDRITITAFYN EARARA |
| P42125 | VNSLSLECLTEFTISLEKLENDKSIRGVI LTSECPGIFSAG  |
| Q8N7C4 | AQIFRGLVIYIVWIFFYETANVVIQILTNNDFDIKEVRIMR   |
| Q9UIJ7 | PVLEY YQKKGVLETFSGTETNKIWPYVYAF LQTKVPQRSQK |
| Q8N1A0 | LPSAINEISFTTKVPQKYENENETVTKQAILNGSIVKES     |
| P15173 | RLKKNVNEAFEALKRSTLLNPNQRLPKVEILRS AIQYIERLQ |
| Q8BGU2 | SEMSNRTMTIYFDQVLV NIGNHFDLASSIFVAPRKG IYSFS |
| A6H6X4 | TTFLEITDNHDRSQGLRIFCNAPDFISKIKSRIVLVSKSRL   |
| Q91VH6 | MSIIEQLDPVSFSNYLKKYHNTICGRHP IGVLLNAITELQK  |
| P08884 | DSGGPLVCDNKAYGLLAYAKNRTISSGVFTKIVHFLPWISR   |

|        |                                             |
|--------|---------------------------------------------|
| Q9WUK2 | QRPRLQLKPRVTATPLNQVANPNSAIFGGARPREEVVQKEQ   |
| Q9Y508 | STDTKSVVCPCASMPWGDPNYRSANFREHIQRRHRFSYDT    |
| P14148 | CMEDLIHEIYTVGKRFKEANNFLWPFKLSPPRGGMKKKTTH   |
| O55125 | DQAVHLWRFSGGYPALMDCMNKLNKNEYLEFRKERSKMLL    |
| P55064 | IGLSVTLGHLVGIYFTGCSMNPARSFGPAVVMNRFSPAHWV   |
| Q9JKY0 | KEPSARLLKHVVRCYLRLSDNPRAREALRQCLPDQLKDTTF   |
| O43704 | SFFMRKGTAGDWKNYFTVAQNEKFDAIYETEMSKTALQFRT   |
| Q96CX3 | TKAILVQHLRIHTGEKPYKCEGKAFQCSPLIKHQRIHT      |
| P41220 | EKEAPKEINIDFQTKTLIAQNIQEATSGCFTTAQKRVYSLM   |
| Q15526 | LESRVLAEPVPLPADPMELKNLEYRFPVKVRGCFDHSKELYM  |
| P56402 | FGLGIGTLVQALGHVSGAHINPAVTVAACLVGCHVSFLRAAF  |
| Q9BRV3 | TATLLGVLLLGYGFWLLVNPPEARLQQLGLFCSVFTISMY    |
| P31098 | SERCMSTKKT SRLTDHSKETNRCELSKELMPKAKDKNKHSN  |
| Q96EF6 | RDRSAEGRALYAVAQRCLPSNEDKEEFLCALARYCLRAPF    |
| Q96GV9 | SSRLYKTRSRYYPYIIPAVNGRRRRRMPSSGDKCTKSLPY    |
| Q3T0C6 | PRIECTGKSESTAFSTYPSNGTIDLKYPYGGKHLGNYL      |
| O75937 | TDEEIKKRFRQLSILVHPDKNQDDADRAQKAFEAVDKAYKL   |
| Q8IVU9 | IGPTHSQKSEDWNI FDKVQANAIIDYDKISLFQHYKLYEFM  |
| P28033 | DKAKMRNLETQHKVLELTAENERLQKKVQLSRELSTLRNL    |
| Q3SZW3 | LIKVFVLTSNFQAIRVTNLNKRKLAFLAILSGLLVESTMVY   |
| P41227 | KEKGRHVVLGAIENKVESKGNPPSSGEACREEKGLAAEDS    |
| Q8R4X1 | LASGYSVWLPRCYFPKFKVGNRFYFSCLVTTITTIISTFLTTF |
| A2AFE9 | MALMIGGPRVGSRVLERSGNNKPYIPVPRSQGFFPPRGSQ    |
| P01906 | VFSKFPVTLGQPNTLICLVDNIFPPVVNITWLSNGHSVTEG   |
| A9UHW6 | EEVDCLVLQLHRVGEQLEKMNGQRMDEL FVLIRDGFLPTG   |
| O43240 | SSITILSPKECEVFYPGVVTNNMICAGLDRGQDPCQSDSGG   |
| Q9HBH0 | SACEQIRAALYLECSAKFRENVEDVFREAAKVALSALKKAQ   |
| Q04917 | THPIRLGLALNFSVFYIEIQNAPEQAQLLAKQAFDDAIAEL   |
| Q9ER80 | SPLPKSSSPKSCPPPPQTRNTDFGNKTFQDFGNRTFQGCR    |
| Q15537 | SVQYRTDERLNWIYKDKQTGNNRVFGNSDRTSTVQNLRLP    |
| Q9NQT5 | GMNGRIWVKAKTIQQTLILANILEACEHMTSDQRKQIFSRLL  |
| Q9BVM2 | KDVYSVVDQKERCIIVRTTNKKYKFKFSIPDLDRHQFLPD    |
| Q9CWJ3 | AYLVRIEDLGVVVDCLPVLTNLSQEELQYISLGCCVDLLPL   |
| Q5E9E3 | SGPMGPAGLPGLKGTGKSPGNIKDQPRPAFSAVGPNVSVD    |
| P33792 | SESGTVDVSKVSEKNKYIKNNTNKVMDVWADYCGSYNNK     |
| Q6UYE1 | QTLQLLQEWGWDGVPVAPGNPRDPDHVSTAPARRSGPPRA    |
| Q99KJ0 | KCLSPTEQKKQVDVNIKLWKNGFTVNDDFRSYSDGASQQFL   |
| P19388 | LVDMPKYILEQFLQOELLINITEHELVEHVMTKEEVTE      |
| A5D7R8 | CRLCYFKKASGQPAVLDSSEENKENCPMTLGKPAEAPGVRKL  |
| Q17QQ2 | PRANIGKFDRIWDRGALVAVNPSDRKRYSDVMSLTPGFR     |
| A6QNL6 | KETDLILTFNISMHRSWWMENGGCTVTSVTPAPDWAPEDH    |



|        |                                             |
|--------|---------------------------------------------|
| P20774 | YEDKYLDGKNIKEKETVIIPNEKSLQLQKDEAITPLPPKKE   |
| P0CG22 | FRPLPGFSPYNVSKTALLGLNKTLAIELAPRNIRVNCLAPG   |
| P18669 | WRRSYDVPFPPMEPDHPPYSNISKDRRYADLTEDQLPSCES   |
| Q86W47 | MNWQQYWKDEIGSQPFTCYFNQHQRDDVLLHRTHDEIVLL    |
| Q3TR08 | LLLVSCDLGFVRADRPPSPVNVTVTHLRANSATVSWDVPEG   |
| P61296 | PGAGPPGLGGPRPVKRRGTANRKERRRTQSINSFAELREC    |
| A6NCD4 | KSSEQRPVNRSYPKCFSLGVNLQNVASEEEEEFMKEFILTD   |
| P40630 | QEAKDSDAQGKLLVNEAWKNLSPEEKQAYIQLAKDDRIRY    |
| O54831 | LAKNIETKLAELFEYTSILNSIYGTITTTGNVEYTVFSGLE   |
| Q5NE16 | MNAFGEMTSEEFQVNVNGFQNKHRKGVLEPLLDIRKS       |
| Q3T062 | QRIATRGVVQLFNAVQKHQKNVDEKVEAGGSIRKRAKLIS    |
| Q5E9A1 | SKLGLRQVTGVTRVTIRKSKNILFVITKPDVYKSPASDTYI   |
| Q8K3A2 | HIHLASGLPGDPGVIISGIRPNCEVAVFTDGPLALTDGIPFF  |
| Q9CX99 | HPWYSGRISRQLAEETLMKRNHLGAFLIRESSESSPGEFSVS  |
| Q05685 | YSRSGSRCIQMWFDDSTQGNPNEDVVKFYASFMTSGTVPHAA  |
| Q2TBU2 | TIDEELERDKRVTWIVEFFANWSSDCQSFAPIYADLSLKYN   |
| Q15527 | RASPAFDYAEFEPHIVPSTKNPHQLFCKLTLRHRINKCPEHV  |
| P30681 | AFFVQTCREEHKKKHPDSSVNFAEFSKCKSERWKTMSAKEK   |
| P12319 | NPPWNRIFKGENVTLCNGNFFEVSSTKWFHNGSLSEETN     |
| Q9BYD2 | YWCEVTVNGLDTVRVPMSVVNFEPKPKTKRYKYWLAQQAACA  |
| Q8N6S5 | EFSAGAWSEPRKRSVLPDNGGSPVLPDKRNGIFPAAAGSR    |
| P60879 | ISGGFIRRVTDARENEMDENLEQVSGIIGNLRHMALDMGN    |
| Q9JHW2 | KSDNLTRACSLVREAAKQGANIVSLPECFNSPYGTTYFPDY   |
| Q96HV5 | LFCGAYLYKQGFAIPGSSFLNVLGALFGPWLGLLLCCVLT    |
| P20718 | GILVRKDFVLTAAHCQGSINVTLAGAHNIKEQERTQQFIPV   |
| Q9D270 | FVVDPHGWCCMGLIVFVWLYNIVIIIPKIVLFPHYEEGHI PG |
| Q9Z2X2 | AGRDEIVKALLVKGAVHNAVNGCTPLHYAASKNRHEIAV     |
| Q9H2P9 | SLENLIKGRKIYEPPTYMSVNQAAQQLLEIVQNQRIRGEEP   |
| Q9JL59 | TIELVTSEKTSIIFNHPTPPGNYSKDSWLHIQGVQAQLVIT   |
| Q96L15 | QNGIAIMVYTNSSNTLYWELNQAVRTGGGSRELYMRHFFFK   |
| P51945 | GRDLTFWQELVSKCLTEYSSNKCSKPNQKQKLVIVSGRTAR   |
| P57776 | AERRFYEQMNGPVTSGSRQENGASVILRDIARARENIQKSL   |
| P54116 | VLTKDSVTISVDGVVYRVQNLAVANITNADSATRLLAQ      |
| Q99P30 | VPYVFDNDALVTPVVGFLDHNFOAQPNADEVKEVFFVPLDY   |
| Q8CDN6 | PQAVFLEVDVHQCQGTAAATNNISATPTFLFFRNKVRIDQYQ  |
| P79125 | KSGLERGLDTFDSTIEIIFQNLKTELESRCSDEVEQQETE    |
| Q9WUI0 | RERLAALTLPEMRIQVWFQNRRAKSRRSQSGKSFQPLSSRR   |
| Q3SZZ2 | DRKKARMSELEQQVVDLEENQKLLLENQLLREKTHGLVVE    |
| A5D7U1 | PNSTDITTVKINIYTVNSLRNAELDSITLPEVGTVTVKHVS   |
| Q9EQ48 | LSIFYTSISSQILIAAIPQNTIFVNLIIYITNSCSFLPLSS   |
| P13805 | EKFDLMAKQKQKYEINVLYNRISHAQKFRKGAGKGRVGGRR   |

|        |                                               |
|--------|-----------------------------------------------|
| Q3TQI7 | KKDSETS FVPTNMAVNVYQHNRFYHEELNAPIRRNKEE PKA   |
| Q6UXN8 | CALQMKY CQAFMQNSLSSAHNSSPCPNW IQNRESCY YVSE   |
| Q14749 | NIYYKSDLTKDVTTSVLIVNNKAHMVTL DYT VQVPGAGQDG   |
| Q99KL7 | SVVKT VSE ESETQPLVALVGNKIDLEHMRTVKADKHLRF CQ  |
| Q8BQM7 | EVNRLHQQLLDCLSDSFQVTNKL TGVLNTHLGCRLAFIEMK    |
| Q8VHX2 | DELCFLEQR PQSPTLEFLFRNSQRTV GQLMELCRLYHRADV   |
| A8MUZ8 | LLTHSGKKPYVSKQCGKSLRNLLSTEPHKQIHTK GKSYQCN    |
| Q60819 | TCPPPVSIEHADIRVKNYSVNSRERYVCNSGFKRKAGT STL    |
| Q8VDP6 | SFYLLSGLLDAFDGHAARALNQGTRFGAMLDMLTDRCATMC     |
| Q69395 | AALEKSSGGRLGVALIDTADNTQVLYRGDERFPMCSTSKVM     |
| Q43396 | PFINKAGCECLNESDEHGFDNCLRKDTTFLESDCDEQLLIT     |
| Q921J4 | PASPPKGYFLTKIFHPNVGPNGEICVNVLKR DWTAE LGIRH   |
| Q8BTQ0 | IRCSAQATV LHLKKFIAKLNLS SFNELDILCNEEILGKDH    |
| P52743 | GKSSLFYHQAIHG VGKLCCKNDCHKVFSNATTIANHWR IHN   |
| Q6UWN0 | TSASCSCPTCVGEHMKDCLPNFVTTNSCFLAASTCYSSTLK     |
| Q0VCT9 | PQHAFNALMGEHIHYGASNMNASSGIRHAMGPGTVNGGHPP     |
| P07146 | NSWTL DNDIMLIKLASPVTLNARVASVPLPSSCAPAGTQCL    |
| Q88587 | HLGWGLVAIGWFEFVQQPVHNLMMGGTKEQRILRHVQQHAK     |
| Q8NA92 | SQRRTSTQKPVSPPPPLQKNTPLPQSPAIPVSGPVRLVVL      |
| A6NC86 | CQSDGCNSAFLSVPLTNLTENGLMCPACTASFRDKCMGFMT     |
| P28676 | DRDHTGKMGFNAFKELWAALNAWKENFM TVDQDGS GTVEHH   |
| Q8BHI7 | ITV LHVYHHATMLNIWWFVMNWVPCGHSYFGATLNSFIHVL    |
| B6A8R8 | QLTATSPKTPGMT EGYTVDNLIRVGVA AAILLIVGGFLVE    |
| P62823 | EESFNAVQDWSTQIKTYSWDNAQVILAGNKCDME DERVVST    |
| A2VE67 | TEKTVFTVFMIAVSGICILLNVTELCYLLIRFCSGSKKPV      |
| Q9Z2X2 | HYAASKNRHETAVMLLEGGANPDAKDHYDATAMHRAAAKGN     |
| Q6IMH0 | YAVRYLKPEVTQNWRYCLNQNP SLDRYGQKPLPFDSLNAFR    |
| Q9JM71 | TPTKYQIPNDLQCVFIKLLPNENCAKAYVHKVTDVMLCVGE     |
| Q2HJF3 | AASCMKCP LDRAYLIKLSGLNKKMYQ SCLKSFECLLGLNSN   |
| Q96A61 | LQLANMVQIIRQMCPTPYRGNRSNDQGMCFKHQEALKFCE      |
| Q32LD7 | SIQVSI EKNLEISKARDIVINRLLYGSTEISTQSLHISQY     |
| Q35387 | PRGGMRFHGNFGFDDLVRDFNSIFSEMGAWTLPSHSPELPG     |
| Q8NC96 | KLDLGFKEGQTIKLCIGNITNKKG GASKPRTARGGGLSLLP    |
| Q5E9Q4 | NGRRAFIGIGFGDRGDAFDNFVALQDHF KWVKQCEFAKQA     |
| Q9BRK0 | VLI FG TLYPAYSSYKAVKTKNVKEYVKWMMY WIVFAFFT TA |
| P51572 | IDAVREIRKYDDVTEKVN LQNNPGAMEHFHMKLFRAQRNLY    |
| P42125 | LVETEGPAGVAVMKLRNPPVNSLSLECLTEFTISLEKLEND     |
| Q71SV0 | ILLFISII LAFKGYLISCVWNCYRY INGRNSSDVLVYVTSN   |
| P0C6B7 | VLQPGYLEVDY GSDAVTMECNFSTVGC PVPVPKSLWFRCGT   |
| Q8BL95 | VMIVYPMGLPPYDPIRMEFENKEDLSGTQA ALEVIQESEAQ    |
| P52803 | PHYEDSV PEDKTERYVLYMVNFDGYSACDHTSKGFKRWE CN   |

|        |                                            |
|--------|--------------------------------------------|
| Q8BHK2 | QDVSITVLNVTLNDSGLYTCNVSRFEFEFAHRPFVKTTRLI  |
| Q04743 | DFIRPAALSYANSSPINPFLNGFHSAAAAAAGRGVYSNPD   |
| P53519 | KSKLIILLTLVPFSSFSTGNNFEINKTRVYSDSTPSVQIS   |
| P55258 | TITTAYYRGAMIMLVYDITNEKSFNIRNWIRNIEEHASA    |
| Q9D287 | QLEHQAVRIENLEMSQHGCNAWKVYVENLVHMIEHAQKEL   |
| P07766 | THWRVLGLCLLSVGVWGDGNEEMGGITQTPYKVISIGTTV   |
| Q7M729 | LPMYLSLEVSVGKATTIYAINGSSILLPCTFSSCYGFENLY  |
| Q8CCI5 | AFKCSICDVRKGTSTRKPRINSQVLAQQVAQQYATPPPKK   |
| P06717 | RSGGLMPRGHNEYFDRGTQMNINLYDHARGTQTGFVRYDDG  |
| Q96H79 | ECQACDQLHFRRHMLGKCPNRDCWSTCTLSHDIHTPVNMQ   |
| Q077R2 | YRVHAGSVSANKFKELIRQSNVLKSIGIKAHHRIICLFYVA  |
| Q3T075 | RQNLLDDLVTRELLLASFKNEGAEPDLIRSSMTGGAKRG    |
| Q64152 | RTATADDKQLQFSLKKGVNNISGIEEVENMFTNQGTVIHFN  |
| Q2TBX6 | SASAMLQPLLDNQVGFKNMQNVEHVPLSLDRAMRLVKDVI   |
| Q8R2N0 | RTGGFAARGEGISQVRFNGQNGKRRRTWRPNPQAFRGSVRK  |
| Q12981 | MLSNQASWRKANLTCKIAIDNLEKAELLQGGDLLRQRKTK   |
| P41439 | MEPTCKRHFIQDSCLYECSPNLGPWIRQVQNSWRKERILNV  |
| Q3SZX4 | QLLLDALDKIKTKGKEAPFNNFNPSCLFPACRDYWTYHGSF  |
| Q9DCX7 | ERVPSDQTSGGQSFVFTGINQPIITFHGATVVQYIPPPYGS  |
| Q9BT67 | ESAAYFDYKDESGFPKPPSYNVATTLPSYDEAERTKAETI   |
| Q8VBV8 | NEEASQYVESMFRAFDKNGDNTIDFLEYVAALNLVLRGSLE  |
| O75712 | LVYVVAERVWGDQKDFDCNTKQPGCTNVCYDNYFPI SNI   |
| B7ZW38 | PPPPPIALAVVPSKRQRI SGNTSRGKSGFNSKSGKRGSSK  |
| P15946 | PDYNMSLLIIHNPEPEDESNDLMLLRLSEPADITDAVKPI   |
| Q96PU9 | FRGAPMLLAENCSPGPRYNVNPKILRTGKDLGPAYSILGRY  |
| P0DMN0 | WWELSRTHPVLVLYFYEDMKENPKREIQKILEFVGRSLPEET |
| Q86W74 | CGHVDTIQFLVSNGLKIDICNHQGATPLVLAKRRGVNKDVI  |
| Q96FA7 | HWKQVLVYKVEIRVSEYSLNSPSPQLQSPRGLCVDPTRVAK  |
| Q8IXA5 | YFTSGFNAAALDYEADGSTNNGIFQINSRRWCSNLTPNVPN  |
| Q86V81 | GRGGGAQAAARVNRGGPIRNRPAIARGAAGGGGRNRPAPY   |
| Q8N699 | LFLVDIMANNNTSLGSPWPFENFWEDLIMSFTVSMAGLVLG  |
| Q64ET8 | TAFSHSSEKHIQRQGSEPNPNKENSEETKLKAGNSTAGSEP  |
| Q01362 | FWGAIFFSISGMLSII SERRNATYLVRGSLGANTASSIAGG |
| Q9QXV3 | AITQADKPNNKRSRRQRNNENRENASNNHDDITSGTFKE    |
| Q96BD6 | PPVSYDVQLLHSSWNNDRSLNVFVKEDDKLIFHRHPVAQST  |
| Q3V3F6 | RSGYKSSIEVSDDDQEDSNDCMTRLCVRCAECLDSYEE     |
| Q75WM6 | KAARKAREVWRRNARAKAKANARARRTRRARPRAKEPPCAR  |
| Q9JIN6 | DQHQLLTNPKCSYIPPCRENQKNSESVMNQYWKDEIGS     |
| Q00322 | AGKRGPDGRGPEYRQRRENNIAVRKSRDKAKRRNQEMQQK   |
| Q8C8M1 | SPCYSNQSDGSDTEMASSNRTPVFSLDLTYWKRQKICC     |
| Q9QXT1 | AAEALLSNGRDGSYLLRDSNEQTGLYSLSVRAKDSVKHFH   |

|        |                                             |
|--------|---------------------------------------------|
| Q86TL2 | RIWFLDTSKQAI GMLFIHFANVYLADLT EEDPCSLYLINFL |
| Q9UJQ1 | YDSSEKTHFKDAVSAGKHTANSHHLSALVTPAGKSYEQAAQ   |
| Q9D710 | DFDWREVEILMFLSAIVMMKNRRSITVEQHVGNI FMFSKVA  |
| Q9H0R3 | TAVHDASEEYKHRMHNLCCDNCHSHVALALNLMRYNNSTNW   |
| Q2TBU3 | HSSARDGRRDRYSSDTTPLLNGSSQDRMFETMAIEIEQLLA   |
| P22061 | KTDKVFVMLATDRSHYAKCNFYMDSPQSIGFQATISAPHM    |
| P30084 | EKRGKNNTVGLIQLNRPKALNALCDGLI DELNQALKTFEED  |
| P53994 | TAKEIYEKIQEGVFDINNEANGIKIGPQHAATNASHGNSQG   |
| Q80XC2 | LPQVYNVRTVSLPLPDLGANNLETNMGSDASFFRSRGTMPKE  |
| Q9D5W8 | FRILLDYVAHEKSETEFMLQNMKIVVASHNIPTRLFMQWHI   |
| Q9BYE0 | NRDGPMLKPLVEKRRRDRINRSLEELRLLLELERTDQNLR    |
| P47754 | DQVLI TEHGDLGNGKFLDPKNRICFKFDHLRKEATDPRPYE  |
| Q9CQC5 | NYELLPGNQEKAHSGQFPGHNDFFRANSTSDSMFTETPSPV   |
| P55253 | TVFAYHVNDPERYGVVEFDNNGTAISLEEKPLEPKSNYAVT   |
| P50283 | QEPTVDRTFSGRINFSGSQKNLTITISSLQLADTGDYTCEA   |
| Q08DD7 | TSCVRRRYREFVWLKQLQRNAGLVPVPELPGKSTFFGSSD    |
| Q8BGN8 | WHSSGQRYLSDPMEKHSSSYNQGRYNQESYGSSGGYSQQAN   |
| Q86U90 | HAFMQDLAQMFEGPLALTSANLSSQASSLNVEEFQDLWFPQL  |
| Q6UWN5 | PVTLVRKGCWTGPPAGQTSNADALPPDYSVVRGCTTDKCN    |
| Q9JM90 | PVTLPNLFSVIDYFVKETRGNLRPFISADDNFGQDPNIED    |
| Q8N6M0 | KEMEQKHRELEQLKLTTKENKIDSVAVNISNLVLENQPPR    |
| Q35565 | GDVRRWRLFSFTKYFLTIEKNGKVS GTKNEDCPYSVLEITS  |
| Q9DC07 | CLDKYWHKGFHCEVCKMALNMNMYKGYEKKPYCNAHYPKQ    |
| P38572 | EVVFPWPPLCCRRTGNFIPVNEEGCRLGHLDYLFTKGCFEH   |
| P26998 | AGKSHGDLGGSYKVI LYELNFQGKRCELSAECPSLTDSSL   |
| Q9JM14 | PGFFLNLEPIPGALDALREMNDMKDTEVFICTTPLLKYDHC   |
| Q8TBE3 | DLGQREEDLQGLPLVEMPRKNSRDGAELDPEANQDAPDAGA   |
| Q6ICI0 | TPTFSFGILTYCSWPQGNSSWQSCVTFSSLEDIPDFAWKVS   |
| P46425 | GRSLGLYGKNQREAAQVDMVNDGVEDLRGKYGTMIYRNYEN   |
| Q9CPZ1 | NKIAQSKPRSNGYDILTI LPNENINRDPGNPQDEEFLDCHT  |
| G3X9C2 | NIYQPAPPTGPTRKPLKELGNFRGWYITTONLQGPLSWTVK   |
| Q5EA33 | EKVNDEKPPENSLDFSEHFNQLELELTHGLIPTGTQSLW     |
| Q9UGB7 | EAVDLLDGLVDESDDVDVDFPNSFHAFQTAEGIRKAHPDKDW  |
| Q7YRA3 | IQARMGVFAQADGSAYIEQGNTKALAVVYGPHEIRGSRARA   |
| P20334 | VGAVQNSCDNCQPGTFCRKYNPVCKSCPSTFSSIGGQPNC    |
| Q9BXN2 | AVVLGTMAIWRNSNGSNTLENGYFLSRNKENHSQPTQSSLE   |
| Q32LD7 | YWRITSIKEKNSLQMOKPISNAVLNEYLEQKLVELYKQYFM   |
| Q06599 | LRWWSYANALMANGVKLEDNQLVVPADGLYLIYSQVLFGR    |
| Q99N05 | GAIQVMIAFINFSLGII IILNRVSERFMSVLLLPFWGSIM   |
| Q15744 | DKAKRRILETQQKVLEYMAENERLRSRVEQLTQELDTLRNL   |
| P00484 | SVMERYKSDTKLFPQGVTPENHLNISALPWVNFDSFNLNVA   |

|        |                                            |
|--------|--------------------------------------------|
| P0DML3 | LKQTYSKFDTNSHNDALLNKYGLLYCFRKMDKVFETFLRM   |
| Q9HB20 | HSSPSAENMNEASSLLSATCNTFITTTLEECVKIANAKFKPE |
| P00551 | CIDVGRVGIADRYQDLAILWNCLGEFSPSLQKRLFQKYGID  |
| O55126 | EVLPKIHEGKQYPCTLVGTWNTWYGEQDQAVHLWRYEGGYP  |
| Q96L46 | RQQFTQLAGPDMEVGATDLMNILNKVLSKHKDLKTDGFSLD  |
| Q2TA29 | IGDSGVGKSNLLSRFTRNEFNLESKSTIGVEFATRSIQVDG  |
| Q8R2Y9 | EPNPEYNTQQAPNKSQVQNNDNSPTAPQATTGPPAASPASEN |
| O14798 | NSPEMCRKCSRCPSEVQVSNCTSWDDIQCVEEFGANATVE   |
| Q8N567 | ALKKDSRREGRRKRQAACKNAMVCFHCRKPGHGIADCPAA   |
| Q28132 | KSSKSPPEPRQFTPEKFFGIFNKSIDAFKDLIVASKMSECV  |
| Q92930 | EKLAIYGIKIFLETSAKSSANVEEAFFTLARDIMTKLNRKM  |
| Q9NP50 | SPCYSNQSDDGSDTEMASGSNRTPVFSFLDLTYWKRQKICC  |
| P97361 | GQLLPLAQGLPLAVSPALPSNPTDLLAGKFTDALSGGLLSG  |
| O08602 | DPLWYEAACLVDIILHLHLSNINKTMTSGDGETANATEVG   |
| Q9UPY8 | KNMQTSGRLSNVAPPCILRKNPPSARNGGHETDAQILELNQ  |
| Q8N8J0 | YCSSDQVEIFSSLLQRSMSLNIGGAKGSMNRHVAIIGPRFK  |
| Q5E9I1 | WQELVSKCLAEYSSNKCAKPNVQKWKWIVSGRTARQLRHSY  |
| Q9GZN7 | GSQRLEVSHVHKVECVI PWLNDALVYFTVSLQLCQQLKDKI |
| Q80ZA7 | NRDDTLALSMYQGPPSADQGNMADAPRFGFWTSVVSQCLQY  |
| P59024 | HYEGYLEKDGSLFHSHTKHNNQPVWFTLGILEVLKGDQGG   |
| Q32L00 | GAWAGPAKSQATAQPAPTAENNLQORPGKAWMNKEQHLSDR  |
| Q96CG8 | LPIEAIIYLDQGSPEMNSTINIHRTSSVEGLCEGIGAGLVD  |
| Q28110 | LNKITYQDRKSKIFSYQRTNFSIPRANLSHSGQYHCTAFI   |
| Q32KV0 | SLRGIVKHLEGMSDQAIMELNLPITGPIVYELDQALKPTKP  |
| Q8IXM7 | FGMSSCPQVPMERISNLRLNPTLASCQYYFEKIHPPGERR   |
| Q969T7 | NKNSSACENSGYFQQLEGKTNVILGDSIGDLTMADGVPGV   |
| Q9JLJ4 | PFGLIFQSSYMMTLVILFLNFYIQTYRKKPVKKELQEKEV   |
| Q3SYT7 | PNLSKCGEELGRLKLVLELNFPTTGTKLTKQQLILARDI    |
| Q68D91 | YQFDRVAVHHAEEALARGDNFETVWLSDSSEVVRTPSPGW   |
| Q6ZN79 | DASTSMTMENSLILEDPFECNDSGEDCTHSSSTITQRLLTHS |
| O18870 | LSDLLSPTSEVANIEQNAQENENESQISTDESENSSRSPLN  |
| P01921 | SLRRLEQPNVAISLSRTEALNHHNTLVCSVTDYFPAKIKVR  |
| Q8BX32 | YLLYCQNPRHRGRVYVGFVTVPARRVRQHNAGRKKGGAWRT  |
| P00586 | GHPVTSEPSRPEPAIFKATLNRSLKTYEQVLENLESKRFO   |
| Q6PCP5 | DGVPNASVIMQVPERIVVTGNNEISFSRPPADLDLIQSTPF  |
| Q9BR10 | QARGCPGGTSWETLRKEYSRNCHKFPHRVQLESGLWDNGYS  |
| Q8CG50 | WDTAGQERFRTITQSYYSANGAILAYDISKRSTFLSVPHW   |
| P35270 | VSKGFVLDSDSTQVNNY WALNLTSMCLCTSSVLKAFPDSPG |
| P20490 | IVSSIAAGTGIAMLILNLNNTNFAVMNCKNVTEDDGCFVAS  |
| Q9QY80 | SFYTFSLLDHLPHFIKWARYNLFIIILYPVGVAGELLTIYAA |
| P07361 | MILVMVSLPLLEAQNPEHVNITIGDPI TNETLSWLSDKWF  |

|        |                                            |
|--------|--------------------------------------------|
| Q9BX4  | YPDINKCTKCKADCCTCFNKNFCTKCKSGFYHLHGKCLDNC  |
| Q9Z2X2 | KMVHILLFYKASTNIQDTEGNTPLHLACDEERVEEAKFLVT  |
| Q5QGZ9 | LKIEMKKMNKLQNISEELQRNISLQLMNMINISNKIRNLST  |
| Q80X85 | LADRRRRFLAMKWMITECRENKPRRTLMPEKLSHELLEAFH  |
| Q96E22 | MAVGISYISVYDHQGIKFRNNSRLMDEILKQQQELLGLDCS  |
| O43513 | GMRVKTEPMDADDSNNCTGQNEHQRENSGHRDQIEKDAA    |
| Q99LZ3 | SPEEFVFAKEYMDHTETHFKNVALKHMPNQLQKVDLLRAVP  |
| Q8CB49 | GDGLRIFWGSTEGWSLLSRWNPWSTEVYATFTEHPMKQTS   |
| Q9UKD2 | NSKLDKIRNAWKHSRMFFGKNKVMVALGRSPSDEYKDNLH   |
| Q9NVX0 | AVLKEKRSRQRLLKPMCQENLPIEAVYHRYMVHLELAVT    |
| A7MAZ5 | VSLAALKKALAAAGYDVEKNNSRIKGLKSLVSKGLTVQTK   |
| O95997 | KSSVPASDDAYPEIEKFFFPNPLDFESFDLPEEHQIAHLPL  |
| Q6ZMS7 | KWAVLGTLLQEYGLLQRRLENVENLLRNRFWILRPPGSK    |
| O95873 | KPMRPDPYPPEPRRDSSSENSGSDWDSAPETMEDVGHPKT   |
| Q9Z2M7 | KLQEQLGNDVVEKYDYVFPENGLVAYKDGKLLCKQNIQGHL  |
| Q8BFR6 | CLRWSIGKVVDFAAASLANLRNENNKLTAKKLRCHVPSGEA  |
| Q32LN5 | DEYGVSSIIPNFQISQDSVGNNSRSETSASDNIETYQENTG  |
| A6NJY1 | HFIEWTKWSQEKMKVQKIITNVWDIFQPLLFLVGAEVSVS   |
| Q16763 | RHVLLTIKCLLIHPNPESALNEEAGRLLLENYEEAARARL   |
| P10103 | KGEHPGLSIGDVAKKLGEMWNNTAADKQPYEKKAALKKEK   |
| Q3LI81 | CHSLRSFHNAPPLSAITHGTNPITFEDRLCLPSSFHSRTCF  |
| Q9JJ57 | VLKEDTPRQHVDFVQKMDKNKGIVTLDLEFLESCQEDDNI   |
| P60410 | ACCTSSPCQQACCVPVCCCKSNCKPVCCVSI CSGASSPCCQ |
| O15551 | AGVLFLLAALLTLVPVWSANTIIIRDFYNPVVPEAQKREMG  |
| Q47066 | RVEIKKSDLVNYNPIAEKHVNGTMTLAEALGAAALQYSDNTA |
| Q9NTI7 | RGRNRQPLVLGDNVFDLWLDLPELEKGGKGETGGAR       |
| P61087 | TPYEGGRYQLEIKIPETYFPNPPKVRFTIKIWHPNISSVTG  |
| Q6UWM5 | DFDSLSCSRVCGHYTQLVWANSFYVGC AVAMCPNLGGASTA |
| Q0P5N1 | KKQCDVLEVEEFEEVIEDWYRNHQEEDLTQFLCANHVLGKD  |
| P16035 | VIRAKAVSEKEVDSGNDIYGNPIKRIQYEIKQIKMFKGPEK  |
| P0AC11 | LDSYQPATQAYALSRGVAYLNDIRGFDDAAFYPLAKSSAK   |
| Q91UZ4 | FVADVEPIFDRLLFFWSDRRNPHEVQPSYATRYAMTVWYFD  |
| Q2KI06 | LLNFIRKNKNKFDCCIISDSNSVFDWVLEATNFHDVFDKV   |
| Q5TGJ6 | KFGKPNKRRGFSAGLWEIENNPTVQASDCPLASEKSGDGP   |
| Q3SZ16 | DSPVAVTIFFGANDSALKDENPKQHVPLEEFVANLRSMVRY  |
| A6NDR6 | GCREDFEDYPASCPSLPDQNNIWRDHEDSGSVHLGTPGPS   |
| Q9CQG3 | PVLNVTRYYNANGDVVEEENSCTYYECHYPCTVIEKQLR    |
| P82918 | KVAGNPCPICRDQKLHVDFRNVKLLKQFVCAHTGII FHAPY |
| Q7YS81 | CSSHSASCSPQWGSALFPGPNPGDHLHPADPTDAHNLHSLT  |
| P11900 | TSYSGFHNWDDLSHSNYTSANKASYLSYSGSVSAGSTLVMN  |
| Q58DM4 | QEQTGGGPAGLAE EEGNSKKNPRRAAPGNGVDSAGLTWGRI |

|        |                                            |
|--------|--------------------------------------------|
| Q58D78 | LYLLHTLWYGFMPRLVQCANVAPCPNTVDCYIARPTEKKL   |
| Q0VCP1 | QNFGQLHLSSGHFLRENKANTEVGDMAKQYIEKGLLVPDH   |
| Q2KIG1 | FSKLQRNILASNPRVTRFHINWEDNTEKLEDAESSNPNLPS  |
| Q9NYZ1 | IDEDGKSHWVFESRKESSQENKTVSEAESRIFWLGLIACPV  |
| Q8R0J7 | QTVQLNKEMTLASNRSLAEGNLLYQPQLDAQKARLTQKYQE  |
| P27707 | I IYLQATPETCLHRIYLRGRNEEQGI PLEYLEKLYKHESW |
| Q08E08 | LPCTFSSCFGFENLHFWSYNSSDTYKILIDGTVKNEKSDP   |
| P49070 | GSSEEEENQTKSKPQDSKLNLSLIPSVSKRVVLGDSVDGG   |
| Q47036 | SALLFYMPDQRHMLFATLWNTGMRIGEARIVTPESFDLDG   |
| P00405 | AYPFQLGLQDATSPIMEELMNFHDHTLMIVFLISSLVLYII  |
| Q99619 | LEELLSAPPPDLGAQRHRGWNPKDCSENI EVKEGGLYFERR |
| Q9NPL8 | RTAVFVTIFNTVNTSLNVYRNKDALSHFVIAGAVTGSLFRI  |
| P25322 | RACQEQIEALLESSLRQAQQNVDPKATEEEGEVEEEAGLAC  |
| Q9ULY5 | QWVDGTPLTKSLSFWDVGEPNNIATLEDCA TMRDSSNPRQN |
| Q4U5R3 | EKLNLVTTWLQLQIPRIEDGNNGVAVQEKV FELMTALHTK  |
| Q9R1P4 | ARSQSARTYLERHMSEFMECNLDELVKHGLRALRETLPAEQ  |
| Q2HJF5 | VGAILSDYQVRVENVCKRLNLQPLAYLWQRNQEDLLQEMI   |
| Q8BHE8 | LMCFWYLT SANIPSESLSGANVFQVKLGDQSVETKQLLSAS |
| Q15493 | EQIPDGMCIDAEGLKWVACYNNGRRVIRLDPVTGKRLQTVKL |
| Q12918 | AILFWIGLNFSLSEKNWKWINGSFLNSNDLEIRGDAKENSC  |
| P04116 | GCGHEALTGTEKLIETYFSKNYQDYEYLINVIHAFQYVIYG  |
| A5D7U1 | GSWENPSDHCEGRAEYYLKGNFSTLFKAKWMSPNSTDI TTV |
| Q9DB26 | LSSGDKIRFFFEKGVFDEKGNFLVPPKESINKIGHALHAHD  |
| Q35164 | QKIKVEKYILPPNYNVSSKFNDIVLLK LKKQANLTSAVDVV |
| Q14925 | MTGAAFGAMNGLRLGLKETQNMMAWSKPRNVQILNMVTRQGA |
| A6ND01 | LELWTVMPTWAGDELLNICMNAKHHKRVSPEDKLYEECIP   |
| Q9H1U9 | HEKRPPILTSSKQDISPHITNVGEMKHYLCGCCAAFNVAI   |
| Q9ER80 | PPPPQTRNTDFGNKTFQDFGNRTFQGCREPPQREIEPPLFL  |
| Q99KJ0 | LSAVSLNNLEPI TRIQIWLANGERTVQRFNVSHRVSHIKDF |
| Q02539 | VSKGTLVQTKGTGASGSFKLNKKASSVETKPGASKVATKTK  |
| P08505 | VLWEIVEMRKELCNGNSDCMNNDALAEENLKLPEIQRNDG   |
| Q9EQK7 | RHPSYVGWFYWSIGTQVMLCNPICGVVYALTVWRFRDRTE   |
| Q9ESN5 | NIQDSNAQLITLNEILEMLINRMFDVPHDPYVKIRDSFWPP  |
| P34057 | QKLEWAFSLYDVGNGTISKNEVLEIVMAIFKMIKPEDVKL   |
| Q6PII5 | FCGHEHTLSNLEFAQKVEPCNDHVRAKLSWAKARPLSRRGK  |
| Q8K572 | GEMRRDVFFFHFCMEGASQEFNEICLELMSEHLARAVKNAGN |
| A7YY49 | DYIDTTWNCGYLLASSFVFLNLLGQLTGCILVLSRNFVQYA  |
| P27105 | VDGVVYYRVQ NATLAVANITNADSATRLLAQTTLRNVLGTK |
| P04233 | TAYFLYQQQGRLDKLTVTSQNLQLENLRMKLPKPPKPVSKM  |
| Q96L46 | EQLYQMIVRRYANEDGDMDFNNFISCLVRLDAMFRAFKSLD  |
| Q3U497 | DTYWCGIEKFGTDRGTRVKVNVY SVGKDTMSTSNQLPWPTV |

|        |                                              |
|--------|----------------------------------------------|
| Q9CQT2 | ASVSYPQHVVGNLSPTSTSPNSYERTVGNVSPTAQMVQRSF    |
| P78380 | FNWEKSQEKLCLSLDAKLLKINSTADLDFIQQAISYSSFFFW   |
| Q9CXX9 | ETPRQAEKLEEEERPPAAPGNLDEAAAAEELPGVDVLEEV     |
| Q8R1L4 | FLGLYRLLYLANWIRRYQTENFYDQISVSVGVVQTI FYCDF   |
| Q673H1 | ARLREENARLRLENRRLRRENRSLFRQALRPLGDSGEREAA    |
| Q07424 | ASNFTAAPVYPHYVGYPHMSNMDPHGPSLGAWSSPYSPPRE    |
| Q2NL24 | QLRSTPFRYLLTPSMQKSVQNKIQSLNWEEMEKTPCIPEID    |
| Q9H082 | KFADTHSMPLFETSAKNPNDNDHVEAIFMTLAHLKLSHKPL    |
| Q9JI59 | GGTHNNSYTMNTKSGILQFNMISKMDSGEYYCEARNSVGH     |
| P01138 | RRARSAPAAAIAARVAGQTRNITVDPRLFKRRRLRSRVLV     |
| P27814 | ECPQDWLLHRDKCFHVSQVSNWEEGQADCGRKGATLLLIQ     |
| Q2KIE2 | PEEFSFGFSFSPGGMRFDNFGFDDLVRDFNNIFSEMGAW      |
| P20352 | NLTWISTDFKTI LEWQPKPTNYTYTVQISDRSRNWNKCFCS   |
| P43120 | RQVKTFWQNRRAKWRLKQENPQSNKKDALDSLDSCEQGGQ     |
| P15945 | SGWGSITPVIYEPADDLQCVNFKLLPNEDCVKAHIEKVTDV    |
| Q3ZBL4 | ENTVAALKSEFQKTLNDQ TENQKSLEENLATAKHDLRLVQE   |
| Q86UA6 | SIMLAWEANPLICPVCTKYNLRLITSGVVVCQGLSIPSHS     |
| A6QR46 | TGYNVKQLFRRVASALPGMENVQEKSEKGMIDIKDKPQEP     |
| Q8TAB5 | PGAEPEKMGAGTVCSPLEDNGYASSLSIDSRSSSPEPAC      |
| Q9DAY2 | EMTEEFPHWEYLSFLKSSDKNNKFLAMFNLSYCIDHDSKYI    |
| P17931 | HDALSGSGNPNPQGWPGAWGNQPAGAGGYPGASYPGAYPGQ    |
| Q9CX11 | PHFKSPVSGSECLLSMVDEGNPHHYFVATQDQNL SVKVVRT   |
| Q91W82 | SPDYPFKPKVTFRTRIYHCNINSQGVICLDILKDNWSPAL     |
| Q9NRE1 | HEDGWPFDPGGILGHAFLPNSGNPGVVHFDKNEHWSASDT     |
| P25325 | RGTEPEPRDGI EPGHIPGTVNIPFTDFLSQEGLEKSPEEIR   |
| Q9D8U3 | NVTSNSICLFRLVDDQQLHLNAEDIENLDAAKLSRF IHVNN   |
| Q80XM9 | MVFGGVVPIYIPQYRDIRRTQ NADGFSTHVCLVLLVANI LRI |
| Q9H825 | NLDSEKHKKGP METGLFPGSNATFRILEVGCAGNSVFPIL    |
| Q96GG9 | MAIAYWNLVNLGRFKFLDLWNKFLLEHHKRSIPKDTWNL LL   |
| Q99MS4 | KWPWQVSLRIYRYWAFWVHNCGGSIIHPQWVLTAAHCIRE     |
| Q43822 | LAELFYLKGLPRLRVLWLAENPCCGTS PHRYRMTVLRTLPR   |
| Q8K4T5 | EATFTTALS LVKEARPSICPNPGFMEQLR TYVQVKESNGGD  |
| Q17QH6 | AIGEMDNQVTQLTAE LKFIKNAVAGVRETEQKMYLLVKEEK   |
| Q16637 | YGNREEQNLSDLLSPICEVANNIEQNAQENENESQVSTDES    |
| P13598 | HDTVLCQCHFTCSGKQESMNSNVSVYQPPRQVILTLOPTLVA   |
| Q0X0E2 | RMESHSEEDRPGAGGGLGWNGRS PRTQSLGACSAEAMLAR    |
| Q8K3A0 | EAAMEEIEATVRAKQKEFTDNINS AFEQGF EKAKEL LTKM  |
| Q9UKR3 | NIQLRSDEECRQVYPGKITDNMLCAGTREGGKDSCEGDSGG    |
| Q969X5 | NELYVDDPKDSSGGKIDVSLNISLPNLHCELVGLDIQDEMG    |
| P51911 | DGIILCEFINKLQPGSVKINESTQNW HQLENIGNFIKAIT    |
| Q3T0C2 | FRKVVDHFGKLDILVNNAGVNN EKNWEKTLQINLVSVISGT   |



|        |                                            |
|--------|--------------------------------------------|
| Q9H2P9 | QNGMHTLCLLDIKVKEQSLLENLIKGRKIYEPPIRYMSVQAA |
| Q61199 | SFNCHIEYEKTDRAKKTALCNFDPKICYQEQTQSHVSWLC   |
| Q9BRX8 | FIRLGVVYNFFRAWNGGFSGNLEGEFILLGGVFFVVGSGKQG |
| P46425 | NDGVEDLRGKYGTMIYRNYENGNKYVVKALPGHLKPFETLL  |
| Q969T7 | FNEDGFLQGFKGQLIHTYKNKSSACENSGYFQQLEGKTNVI  |
| Q96E22 | SAAVLAPLGFTRKPPAVGRNRRHRHPRGGSCLAHAHRM     |
| Q3UY34 | EAGAADKQAPTQPSPRRHEVNQHEEDGNLRTTPEFRAHVA   |
| Q06600 | KPAAHLVGDPTQDSLWRANTDRAFLRHGFSLSNNSLLVP    |
| Q99KR3 | VTHWSDHSGGIVDICKNINNDTYCIKKLRNPQREIIG      |
| Q9D241 | EVRLCPQRLVGSAASTRPANWTGEEQDTVSVNRVAARRL    |
| P59542 | SMWLAASLSIFCLLKIANFNSLISLHLKRIKSVVLVILLG   |
| Q9DAF8 | RMSPCMQPKKPGFELLMSYRNRGKALLKRLQRQWDYESKLG  |
| Q3SWZ6 | LKEKMKIERAHMRLRFILPVNEGKLLKEKPLIKVIESED    |
| Q9QZ4  | VFYILCSLQRNLLRNPCAENLSSWRIDSNNGDRWKVETLP   |
| Q58DH1 | KSTRQAPRGTKNTNLSLKSNGKLRASSVEDETAIDILRR    |
| Q96AH0 | EQKNNSMNSNMGTFGPGVNGVHTGPESREHQFSHAGRSN    |
| P70190 | VEEQENKFQAAVIEELQELSNEALRKILRRDLPVTRTLIDW  |
| Q8K2U2 | RQVFNAPKPKWTQLSGRKLQNWGGLPHPRGMVPERLPPWLQ  |
| Q5JBG6 | VIHPGYKNRISILYPWERRKNATCYLGYLKKGIYYQGCENG  |
| P59279 | SWLEDARQHSSNMVIMLIGNKSDLESRRDVKREGEAFAR    |
| Q00188 | SGFAQLASQFPAAELFVVWLNFPYWGPIEHEGKSFEQMAYT  |
| Q64471 | ELYLDLLSQPCRAIYIFAKKNNIPFQMHTVELRKGHELSDA  |
| P24390 | HDTFRVEFLVVPTAILAFVLNHDFTPLEILWTFSIYLESVA  |
| Q14AM7 | EAAAAAQPEHKQQLWHLFQNSATAVAQLYKDRVCQQPGLS   |
| Q2MKA7 | CSEVNGCLKCSPKLFILLERNDIRQVGVCLPSCPYPGFYDAR |
| Q00286 | ASAALPLRMHHSAAECLPASNHATNVMSTATGLHYSVPSCH  |
| Q6URK8 | TTYCRKDEFDHAFTLLGVPNKPLQCLDITATGQKLRNRYH   |
| Q5T1C6 | VVMINSQLDKVEGRKFFVSCNVQSVDEKTYSEATSLFIKL   |
| Q7TQI3 | AAEEPQQQKQEPGLSDSEGVNCLAYDEAIMAQDRIQQEIA   |
| P22692 | EIEAIQESLQPSDKDEGDHPNNSFSPCSAHDRRCLQKHFAK  |
| P39687 | LEFLSTINVGLTSIANLPKLNKLELSDNRVSGGLEVLA     |
| P09611 | LFERATLVASNNYRLAREMFNEFNKQFGEGKNFTSKVINSC  |
| P52743 | QQSNLAQHQRVYTGEKPYKCNWGWKALSGKSSLFYHQAIHG  |
| H3BQB6 | QGGKPLKRKSKCDATLIDRNESEDFGVVESDMSYNQADD    |
| Q8BGZ2 | PYKVPPTQSNAPPYSPSPNYQTAMYPIRSAYPQONLYA     |
| P05142 | QIQIPNQRPPPSGFPQRPVNGSQGGPPPPGGPQPRPPQGP   |
| O43692 | LLCEASTVVLLNSTDSSPTNFTDIEAALKAQLDSADIPK    |
| P51908 | ISSGVTIQIMTEQEYCYCWRNFVNYPPSNEAYWPRYPHLWV  |
| P41976 | LKFNNGGHIHNSIFWNTLSPNGGEPQGELEAIKRDFGSF    |
| Q8CAK3 | SCAHPKSRQNHLPKVLHPSNPHISSGSTVATCLSQGGGLVD  |
| Q9NXJ0 | SQPGQGNIQMINPSVGTAVMNFKEEAKALGVIQIMVGLMHI  |

|        |                                             |
|--------|---------------------------------------------|
| Q9NZ63 | VPTNMAVNYVQHNRFYHEELNAPIRRNKKEPKARPLRVGDT   |
| Q8K3K7 | DLMVKENLKVWIYPEGTRNDNGDLLPFKKGAFYLAIQAQVP   |
| Q96LR5 | ELAEITLDPPPNCASAGPKGDNIEWRSTILGPPGSVYEGGV   |
| Q17QJ0 | VLVGPVPAGRHMVFQADAPNPSLIPETDAVGTVVVLITCT    |
| Q43763 | RLTAALSPFSGTRRIGHYPYQNRTPPKRKKPRTSFSRSQVLE  |
| Q9JL62 | SKGQNVTEEECLEKIRLFLVNYTATIDAIYDMYTKMNAELD   |
| Q5Y7A7 | SECHFFNGTERVRFLDRYFHNQEENVRFDSDVGEFRAVTEL   |
| Q3SZI4 | FDISKKEMQPTHPIRLGLALNFSVFYIEILNNPELACTLAK   |
| O00560 | SSAARNGLLTEHNICEINGQNVIGLKDSQIADILSTSGTVV   |
| Q14135 | PGERQQNRPSVITCASAGARNCNLSHCPIAHSGCAAPGFAS   |
| Q15526 | IPVTAFLGLGTWQVQRRKWKLNLIAELESRVLAEPVPLPADP  |
| Q8N2G6 | LAFGKGRPEQLGSPHSSYLNSFFQLQRGEALSNSVYKGAS    |
| Q9UNI1 | TLNSYVQLGVLPEGAILANNSPCYITGWGKTKTNGQLAQT    |
| Q9UF11 | RRIWVRVYSPYQDYEVVPPNAHEATYVRSYYPYAGPGV      |
| Q5E9L3 | APYPAPAGSYPTPGLYPTFNNPFQVPSGFSGAPPMPGGFHS   |
| O95749 | LAVGLMQLFSDYKEDLKPLLNTLGLFFQIRDDYANLHSKEY   |
| Q8IZJ6 | GPFYISDILDYKNLREIVVNNRITWLFHYSALLSAFGEANV   |
| P53701 | ARIRSWMGYELPFDRHDWIIINRCGTEVRVYIDYDGGEVNK   |
| Q8WW43 | VLLTHLLVSAQTFISSYYGINLASAFIILVLMGTWAFLAAG   |
| Q8N5S3 | SIHHSKSHVGRGRIYYAKFINTNARTYNEPPYIDPKKGPE    |
| Q9D7T1 | IFGVPGEPKAIRGVVLESVRNGMMESQLPGRKAVEQFVLET   |
| P56749 | GTLLENWRKRLRITFNRNKLNLTVYTG LWKCARVDGSSDC   |
| Q9D7I0 | FGEDNSIPVFCPDFCCGSCSNQYCCSDVLRKIQWNEMCPE    |
| Q8N7R0 | KQVKTWFQNRMKSKRWQKNNWLKNSNGVTQGCLVNPTGNL    |
| Q9D1G5 | TEFPSELQKLTSNLRTIDLSNNKIDSLPPLIIGKFTLLKSL   |
| O14593 | YTDIVGLLLERDV DINIYDWNGGTPLLYAVRGNHVKCV EAL |
| Q3ZCD8 | EGVSNASVIMQVPERIVVAGNNEDIPFSRPADLDLIQSTPF   |
| Q6QRN6 | SSAVKYLSEQEAAQAVDQELFNEYQFSVDQLMELAGLSCATA  |
| Q8NHV1 | AEKESQVQELVELIEKMVQCNEGAYFSDDIYKDTEERLKQR   |
| Q9Z120 | KPEEMDWSELYPEFFAPLIQNKSHDDPKDEKEKHSQAQVEF   |
| Q6P1N9 | GEFEKNNPDLYLKELLNLAENNKGVVAIGECGLDFDRLQF    |
| P53701 | ERAYEYVECPIRGTAAENKENLDPSNLMPPPQTPAPDQPF    |
| Q96LD8 | NSNQAAAGGTHWSLLVYLQDKNSFFHYDSHSRSNSVHAKQVA  |
| Q99426 | PGYWIGVRYDEPLGKNDGSVNGKRYFECQAKYGA FVKPAVV  |
| Q8BJ83 | FDCTVKPSVTCVDQDLKPQRNFVINMTCRFCWQLPETDYEC   |
| Q64695 | ELPEEEEEGESEPHVFFDVAVNGSAFVSFRPKTAVWVSGSQE  |
| F1MN90 | VARVTFDLYKVNPDQDFIGCLNVKATLYGTYSVSYDLHCSGA  |
| Q3T014 | RLNERHYGALISLNREQMALNHGEEQVRLWRRSYNVTPPPI   |
| P12544 | DPATREGDLKLLQLMEKAKINKYVTILHLPKGDDVVKPGTM   |
| Q14C20 | SVDTHQRSFDIGIQIGYQRRNKDVLAWVKRRRTIRREDLI    |
| O00161 | ETEKTLTELKCCGLCVPCNRTKNFESGKAYKTTWGDGGE     |

|        |                                            |
|--------|--------------------------------------------|
| Q5EA91 | GCQPEQVTQRPEEGKESLSKNLLLVALCLTFGVEVGFKFAT  |
| P97361 | TGILTKVLPPELIQGGKVCPLVNGILSGLDVTLVHNAELLIH |
| P15177 | VSSTLALSGCGAMSTAIAKKRNLEVKTMSETIWLEPASERT  |
| P20160 | VAGWGSQRSGGRLSRFPRFVNVTVTPEDQCREPNNVCTGVLT |
| Q9P0N8 | CTGTLGAVHKSCLEKWLSSSNTSYCELCHEFEFAVEKRPPL  |
| P50172 | QTSLSLFHDDIHSVRRVMEVNFLSYVVMSTAALPMLKQSNQ  |
| A6QQC0 | KWGQGDPRWIVEEREDGTNNVNNHWHTERDATSWSKGRLREL |
| P07628 | KPDDLQCVFLKLLPIKNCIENHNKVTDMVLCAGEMSGGKN   |
| Q8R5B6 | KLYPVVSAVWGHCEVTMRYINGLDPEPLPLMDLCRRSIRSA  |
| P40337 | ELGAEEMEAGRPRPVLRSVNSREPSQVIFCNRSRPRVLPV   |
| P10738 | TTDVPDKYWKLYTYFVSKWVNREYRQLFTKNQFHQAMKHAK  |
| Q6UW56 | ICQGGKNLCNNTGDEPEMCPENGSCVPDGPGLLQCVCADGFH |
| Q64302 | KCARYIGYSLVWAAVFCIVANALLYFPNGETKYATEDHLSR  |
| O75192 | TVKNLCDILNPLDQLGIYKSNPGIIGLGLVSSIAGMITVA   |
| Q99KR7 | ENFTLKHVGPVLSMANAGPNTNGSQFFICTIKTDWLDGKH   |
| O14990 | ESSILAAHRATYRDYDLMKANEPGTSYMSVQDNGEDSVRDV  |
| Q3T0B6 | KKIQKYKSLPKMSGWELEVNGTEAKLVRKVAGEKITVTFN   |
| Q3SZD7 | AFKTADTTFPHIQAEVTMKTNFFGTRDVCTELLPLIKPQGR  |
| P50539 | SSGSSNTSTANRSTHNELEKNRRAHLRLCLERLKVLIPLGP  |
| Q62193 | NEFTAHILEVNSHMMLSKPNSQASAGRPSMSNPGMSESN    |
| P11672 | MCLGLALLGVLSQAQDSTQNLIAPASLLTVPLQPDFRSDQ   |
| Q8BKT2 | RINRSLEELRLLLLLERTRDQNLRNPKLEKAEILEFAVGYLR |
| O70338 | VYWGPGHPLNVGIRLPGRQTNQRAEIIHAACKAIMQAKAQNI |
| P01882 | STHPMSSWLLCEVSGFFPENIHLMWLVHVKMKSTNFVTA    |
| Q99KF1 | SLFAGGMLRVHLDIQVGEHANDYAEIAAKDKLSELQLRVRQ  |
| Q9NUM4 | SYDVQKRTIYLNITNTLNIITNNYYSVEVENITAQVQFSKT  |
| P19437 | IYDCEPSNSSEKNSPSTQYCNISIQSVFLGILSAMLISAFFQ |
| Q01730 | NNQIEELPTQISSLQKLKHLNLGMNRLNTLPRGFGSSRLE   |
| Q497H0 | STPSTSNSQSDLFSEETSDNNNTSVTPTLSPSQQLPTE     |
| P36369 | NWVLTAAHCYVDQYEVWLGKNKLFQEEPSAQHRLVSKSFPH  |
| Q86XI6 | ESESFVLDQSADYLDFRNRLQADHVCLENCVLKDKAIA     |
| Q2KIV0 | ADELDRLVAKTESVQYDHPNHTVTVTTISDLDLSGARLLG   |
| Q2T9L9 | EVGKLRIAKNQGRTEVSFTLNEDLANIHDIGKPPASVSAPR  |
| Q8N1B3 | KVEEQHLRTRDIINVSNRYPNPSGEPLELDSRFWELRDSIV  |
| O35381 | GDLEVLAEKCPNLKHLNLSGNKIKDLSTIEPLKLENLKS    |
| Q3T112 | SRASAGNYIATLKVNVKIEINPYLLGTMSGCAADCLYWERL  |
| Q3T0X5 | LLIAGYDDMGPHIFQTCPSANYFDCRAMSIGARSQSARTYL  |
| P08505 | SSGLEYSYLEYMKNLKDKNKDKARVLQRDTETLIHIFN     |
| O55144 | LPASFAGLGAPFEDAGSYSVNLSLAPAGVIRVPAHRPLPGA  |
| P56749 | LPLSMLIAMGALLLCLIGMCNTAFRSSVPNIKAKCLVNSA   |
| Q28153 | LLVFTSLVLYGHSTQDFPETNARVVGGTAVSKNSWPSQISL  |

|        |                                              |
|--------|----------------------------------------------|
| O75461 | YLTRKFMDLVRSAPGGILDLNKVVATKLGVRKRRVYDITNVL   |
| P62242 | NFSWGSECCTRKTRIIDVVYNASNELVTRKTLVKN CIVLI    |
| A4FV75 | EAYICPVLFGSASGGDHHHNNHGGSQGGSGPGSPHSPLFSK    |
| Q6IMH0 | AIEDWSKFVSRSEEFKLCANKRVVEGFSGYAVRYLKPEVTQ    |
| Q9XT98 | IGSVWYAVDVYVERS SSVLHNI FLGIQYKFGWSCWLG MAGS |
| Q9CQX0 | QTPNDLLAAGFEEHKFRNFFNAFYSVVELVEKDSVSSLLK     |
| Q32KY9 | LVEKKFLALQNKNSDADFQNEKVFQFKQLKELKKQYGLQ      |
| Q8NC06 | MPRPPETFLRRVTGWKEQVVNGDVGAVSEPPCLPKEPAPS     |
| Q9Z120 | EDPIVEHLGSSTEEGKKVLRNGGKNFPAVFRRIQDPLLQAV    |
| A4QP2  | VARSLYWHTGTGTEHIEVTCLNSTSHKILVSEDMDEPRAIAL   |
| P35242 | IAAPRNPEENEAIASITKKYNTYPYLGVIEGQTPGDFHYLD    |
| Q8NDC0 | WGSMSGWPAPGMGGQYPTPNMPYPSPGPYPAPPPPQAPGA     |
| Q1RML1 | GKDFPASPPKGYFLTKIFHPNVGANGEICVNVLKRWDTAEL    |
| Q9D8T4 | IDEDGKSHWVFESRKSTPQDNKTI SEAESRIFWLGLIACPV   |
| P51159 | I ALAEKYGIPYFETSANGTNISQAIEMLLDLIMKRMERCV    |
| P49406 | LDDSLLYLRDALPEYSTFDVNMKPVVQEPNQKVPVNELKVK    |
| Q9D650 | VIHLHQGEIRQDSLYQAGAA NVGRVVNSWYRVRPLVAELVV   |
| P15530 | SCGTELLVLGFSTLDQLKRRNTLKDGI ILIQTLLI ILFIIV  |
| Q504P2 | YSQLNQYGTWQESVMAC SARNASLLKVKNKDVLEFIKYKKL   |
| Q0P5E2 | IRELIEVDDV MEDSTLQFGPNGGLVFCMEYFANNFDWLENC   |
| Q2KHU0 | EHPHHTPGIRELVSRLQERNVQVFLISGGFRSIVEHVASK     |
| Q925U0 | ISLQCADHWFHRLRIRPTIFHNI FMEPDEVFLGIGCPVTTTW  |
| P14231 | CVFIKMRVINFYAGANQSMNVT CVGKRDEDAENLGHFVMF    |
| Q8N1N2 | HGKYILNVEHSENQPPITHPNDQEAHSSICWCLPSNDITSD    |
| Q3ZBX1 | ANTKEVRWQKVLYERQPF PDNYVDRRFL EELRKNIYARKYQ  |
| P22676 | MKSNDNFGEKMKEFMQKYDKNSDGIEMAELAQILPTEENF     |
| P51151 | AWCRDNGDYPYFETS AKDATNVAAAFEEAVRRVLATEDRS D  |
| P12544 | ICAGALIAKDWVLTAAHCNLNKR SQVILGAHSITREEPTKQ   |
| Q3ZCC4 | QTSEAGSTGEEQKEEESNGFNKDLLDSPHNAGAASTVNEEE    |
| Q99390 | PEGNIKHPLIILCHGFCGIRNVLLPCFANAFTEAGFATITF    |
| A7E2S9 | SGADPNIVDVYNTAVHYAVNSENL SVVAKLLSCGADIEVK    |
| A4D1T9 | EAPVMSDRECQKTEQGKSHRNSLCVKFVKVSRIFGEVAVA     |
| Q53H82 | TGEPAPIEYISCLKQALTEFN TAIQEIVVTHWRDHSGGIG    |
| Q5BU09 | EDEDKTVTKKKKKQHRIPTNDEL LYDPEKDNRDQAWVDAK    |
| P04179 | DVTAQIALQPALKFNNGGGINHSIFW TNLSPNGGGE PKGEL  |
| Q8TDU5 | SANHTLGFILFSWV LNMFITNNLLFIVPTPNRIGASLLFV    |
| Q9D4V7 | RHEVLIRTAFLAEDFNAEEINLDCTNPRSSAAGSSNAVKLS    |
| P62261 | DTLSEESYKSTLIMQLLRDNLTLW TSDMQGDGEEQNKEAL    |
| Q9QVN7 | PSTPRITTFPQVPITCDAVRNKREMLT LALQTDHHDHVAVG   |
| P49863 | LREVTVTLSRKL CNSQSYNGDPFITKDMVCAGDAKGQKD     |
| Q9WUJ8 | FLRLSKVKCVSLSARSSETSN AVICLDLAASCRKCPDRAY    |

|        |                                            |
|--------|--------------------------------------------|
| Q9P016 | SGKRKTENSGEALAKVEDSNPQKTSATKNCLKNLSSHWM    |
| P48307 | LSSMTCEKFFSGGCHRNRIENRFPDEATCMGFCAPKKIPSF  |
| Q02013 | GCGINPARSFGSAVLTRNFSNHWFVWGFPIGGALAVLIYD   |
| Q3KR8  | SLRSSENKMDSSNLAVIFAPNLLQTSEGHEKSSNAEKKGV   |
| P32972 | LVVAVAIILVVLVQKKDSTPNTEKAPLKGNCSEDLFCTL    |
| O60248 | PRRKAKSSGAGPSRCQGGRGNLASGGPLWGPYATTQPSRG   |
| Q8NEA5 | QGAASRSTAASPTNPMKFLRNKAIIRHRPALVKVILISSVA  |
| Q9CWE0 | VAADAASASLTPDFFSSGSSNVSSPLPCFGSSLHSTTSFVI  |
| Q8N6I1 | RHPLSVLGINYQQFLRHYLENYPIAPGRIQLEERRRRRFE   |
| Q28151 | QKKYLKHXNIHTGKPYECNECGKAFSQRSTLIVHVRHS     |
| Q96MF7 | LVEKKFLALQSKNSDADFQNEKFFVQFKQLKELKQCGLO    |
| Q27956 | SSANSFLILYYTAQGEPPFNLDKLCSPNVTDFFPFHANGT   |
| Q08DN6 | TRTATLCGRELPDGPSPLLKNAISLPVIGGPQALTLPAQA   |
| O35622 | YGWGITRQLYLSAGPYVSNCFLRIRSDGSDCEEDQNER     |
| Q6PF2  | TLKSGGAVSTPASTLWRATNNSSPDSFASLCSNSNSTSSS   |
| Q8BX65 | QEPGKEETGKIKNGGHRMSNGNGIPHGAKHVSVENHKISA   |
| O43711 | LPASFAGLGAPFEDAGSYSVNLSLAPAGVIRVPAHRPLPGA  |
| P09025 | FQHASHHVQDFHHGTSGISNSGYQQNPCSLSCHGDASKFY   |
| A4FUA8 | TIDGQOTI IACIESHQFPKNFWNGRWRSEWFTITPPTAQ   |
| Q9H2A3 | GAKTAETVQRIKKTRRLKANNRERNMHNLAALDALREVL    |
| Q30154 | NSQKDFLEDRAAVDTYCRHNYGVGESFTVQRRVEPKVTY    |
| P97428 | ASRAHHIFDEYIRSEAPKEVNI DHETRELTKTNLQAATTSC |
| P07288 | EPEEFLTPKKLQCVDLHVISNDVCAQVHPQKVKFKMLCAGR  |
| Q96KN4 | LVVQNACGHLGLKSEEICWTNSESFAAWCRFGKREFKAGGE  |
| P97466 | LRAAPAGGQHYLHIRPAPSDNLPVLDLIEHPDPIFDPKKED  |
| Q8BVN0 | LYEKRDLIKLNKTMKEDLMENLQDSQGNCTIQIQEDISEIK  |
| Q9P1T7 | VPSGEEIGKIKNGHTGLSNGNGIHHGAKHGSADNRKLSAPV  |
| Q96E11 | VNEEMKSVIEALKDNFNKTLNIRTSFGSLDKIAVVTADGKL  |
| Q9CQI0 | ESAAIGLQKFKPLATFSFANHTIQIRQDWRQLGVAAVVWD   |
| Q9TVC8 | TWQRQVEPTVTIFLSRTEALNHHNLLVCSVTDFFYPGQIKVR |
| Q9D3F7 | LVLRLDSRLWPKIQGLLSSANSLSLPGYSQSLTLSTGFRVI  |
| Q9NP50 | NSDAHSTSSASPAQSPCYSNQSDGSDTEMASGSRNRTVVF   |
| O35963 | KFADTHSMPLFETSAKNPNDNDHVEAIFMTLAHKLKHKPL   |
| Q2NL33 | WEDSSRPSPLFSAYEYAQINESKGCAYFQNGNIYISRCSA   |
| Q61160 | RSLSERVRESLKVWKNAEKKNASVAGLVKALRTCRNLVAD   |
| Q2HJI0 | TFILRNTIEGQGVIECFELYNPRIQEIQVVKLEKRLDDSL   |
| Q8BX65 | LPQLQTSAQEPGKEETGKIKNGGHRMSNGNGIPHGAKHVS   |
| Q9CVB6 | CFASVFEKYFQFQEEGKEGENRAVIHYRDEETMYVESKDR   |
| O35658 | KEVSFQATGDSEWRDNTNYTLNTDSLWDALYDHLMDFLADRG |
| Q96GG9 | RQFMIFTQSSEKTAVSCLSQNDWKLDVATDNFFQNPELYIR  |
| Q61200 | DLRYDTPEPYSEQDLWDWLRNSTDLQEP RPRAKRRPIVKTG |

|        |                                            |
|--------|--------------------------------------------|
| Q8CCI5 | PPSEANSIQSANATTKTSETNHTSRPRLKNVDRSTAQQQLAV |
| Q96LD8 | FLGRKGDKLAFVEEKAPAQQNSYDCGMYVICNTEALCQNF   |
| Q3MHM8 | ACLLAITYLIVKELHAENLKNEDDVNTGLLGFWSLLIISLT  |
| Q9NVX0 | ASAPNGAGLVLGHF IASGMVNQEMLNMSKKTVSCFVNFTRL |
| P17931 | DVAHFHFNPRFNENRRVIVCNTKLDNNWGREERQSVFPFES  |
| Q99KI3 | PPSPMTDPTMLTDMMKGNVTNVLPMILIGGWINMTFSGFVT  |
| Q8BWX2 | NRKLIETLQQVAVKLCRELYNKSGGHRCSPECWKWYGDK    |
| Q8MJ50 | GYADIVQLLEKGARTDLRNNKLLALDMATNAACASLKK     |
| Q78HU3 | QKAGYFLCLSTLGI PENPQDNVVDMQIVMDKGPLPSGFSA  |
| P29020 | LYLRAKFSRSAETAANLQDPNQLYNELNLGRREEYDVLEKK  |
| Q8BVA2 | KHRMHNLCDDNCHSHVALALNLMRYNNTNWNMVTLCFCFL   |
| Q9CY52 | VRLDGRNFHRFAEEHNFAKPNDSRALHLMTKCAQTVMEELE  |
| P43528 | YNDGYVSTTTTLRQAHFLGQNM LGGYNEYYIYVVAAPNLF  |
| P25732 | EQNISLNI SRNAKKN I IYNNGNVRAGKDIYFCKSSNIDD |
| O75822 | LKKLQEE SDLELAKETFGVNNAVYGDAMPSSRDFTTEFG   |
| Q14990 | CTSPCSPCSPCPCNPCSPCPCSPYDPCNCPYPCGSRFSC    |
| Q80WB5 | WREPPPEYPC IETGDSKMNLNDFISMDPAVGWAVYTLPEF  |
| Q8BXX9 | VVQLSTLEIRHKIAELEANLNGDLAGSEWKTRYETQLELND  |
| O18870 | ESQISTDESENSSRSPLNKPNNISRAAPWNSFLPPPHMP    |
| Q9JIQ3 | WVTRSVCSLFRYRQRFVPLANSKKRCFSELIKPHWHTVLTG  |
| Q8N131 | AAMAASANIENSGLPHNSSANSTETLQHVPSDHTNETSNST  |
| Q9BQP9 | NIQLDCGGIQISFHKEWFSANISLEFDLELRPSFDNNIVKM  |
| Q8VD53 | VVCVLSAITTCLAFIKPAINNISLMLGLPCTALLVAELKR   |
| Q6UXV1 | ARAGAVLMGMEGPFPRDYALNVFVGKVTNQLDLVASFVKN   |
| A6QP81 | PGDSNEIEASLRSLQKFVPTNYASYTQEYYRFVGGKIVIQE  |
| Q9S169 | ADKTGAGERGARGIVALLGPNNKAERIVVIYLRDTPASMAE  |
| P28585 | AELERQSGGRLGVALINTADNSQIILYRADERFAMCSTSKVM |
| P16152 | GTRDVCTELLPLIKPQGRVVNVSSIMSVRALKSCSPELQQK  |
| Q9DB75 | PPYEPGPQVPVPGFVPPHMADGTYMPAGFYPPPGPHPPM    |
| P33783 | TPGEDFSGELKLEGAVTSTRNFWVKVQGNGESLEVKQSRG   |
| A6QQ85 | QLRVLRVGNDTRCSPRTRGCNRPLPGPGPYRVKFLVMSDRG  |
| O96011 | KQIRQLESHLSLGRKLLRLGNSADALESAKRAVHLSDVVLR  |
| P97328 | DVSQVTWQSQGDTPCSCCIVNNSNGSRTI ILYDTNLPDVSA |
| Q9EST5 | RIHLELRNRTPAAVRELVDNCKAMDGKIEGLTDEFVNLEF   |
| Q9JKY0 | HSFGTIAALLQEIVNIYPSINPPTLTAHQSNRVCNALALLQ  |
| Q5E9I1 | GRDLTFWQELVSKCLAEYSSNKCAKPNVQKWKWIVSGRTAR  |
| Q2TA42 | KAREEEERAKREELERILEENNRKIAEAQAKLAEEQLRIVE  |
| Q7YRA3 | YGPHEIRGSRARALPDRAVNCQYSSATFSTGERKRRPHGD   |
| Q9JM71 | ICGGVLLDPNWVLTAAHCYGNDSQHNVWLGNKFLQREPS    |
| Q3T123 | PHSEAGMRVKTEPMDTDDSNNCIGQNEQRENSGHRRDQII   |
| Q13158 | EDRYPRNLTERVRESLRIWKNTKENATVAHLVGALRSCQM   |

|        |                                             |
|--------|---------------------------------------------|
| P63013 | LSWGTASPYSAMATYSATCANNSPAQGINMANSIANLRLKA   |
| Q91VN4 | MDEEERVRLQGI RLSESVVNRMKDCSQPSAGEQLVPGFGP   |
| P51122 | DLSTIEPLKKLENLKS LDFNCEVTNLNDYRENVFKLLPQL   |
| O09044 | NGQPQOTTGAASGGYIKRITNDAREDEMEENLTQVGSILGN   |
| Q8BYH0 | SCCVPDPMGLSFLPTYGCQSNRTASVAALRMKAREHSEAVL   |
| Q9EQC7 | VVCRAAPCFVPSNPGQELCGNNNVTYISSCHLRQATCFLGR   |
| P00847 | I IETISLFIQPMALAVRLTANITAGHLLIHLIGGATLALMS  |
| O75871 | SLLFQNTILEDAGSYTLRTINASYDSQATGQLHVHQNNVP    |
| P09493 | AELSEGKCAELEEEELKTVTNLKSLEAQAEKYSQKEDRYEE   |
| O00338 | LYVARNAKDCMVSYVHFQRMNHMLPDPGTWEEYFETFINGK   |
| Q3T046 | CVCPGTVDTPSLQERIQARPNFEEALSDFLKRQKTGRFATA   |
| Q96MU5 | GPVSSPLLGDHRCVLPFRDLNPSSEVNTANLLES PSSLLLT  |
| Q92564 | NKDQWCNVLEFSRTINLDSLNYDEDGAWPVLLEDFVEWYKD   |
| A5PKD8 | WVLINPLRKEDEGVYQCHSANAVGEAQSHGTVTVVDRSQYR   |
| Q17QQ9 | SIQTSKTEAETVRVSTEKLNKRKEKRSRDVASKKEERKRK    |
| O08899 | VVTCQRVSEQEEVKWAESLENLIHHECGLA AFKFLKSEYS   |
| Q9BUV0 | GTRNPNEKPTQQRSTAFSSNNSVAKPIQKSAKAATEEASSR   |
| P0CI00 | EEWDMMDTSKRKLYRDVMLENISHLVSLGYQISKSYIILQL   |
| Q8K4T5 | ECFEFIEQAKLKDGVVLVHCNAGVSRAAAIVIGFLMSSEE    |
| Q8C4B4 | RERLLKTFDFDFGFCIPSSRNTCEHIYEFPLQSEDVIRLMI   |
| P0C8J7 | VPAFNIHNLETMQVVVETAANLHAPV IAGTPGTFTHAGTE   |
| A2A8T7 | NVAINTGPPPAVTKTEPEDQNSDSLWELDLSEGRNFVVQDS   |
| Q3T0Q3 | HVTSRD LISNSPRVIPVTSRNRDNDPN DYVEQDDILIVKLR |
| Q8NAU1 | LFMWAGVIALFCRQYDIKDNPNNNKEKTKSASETSTPEH     |
| Q9ESN5 | TEEELIKECEEMWKMEDCQNKLSLIGTETLTNADAQLSLL    |
| A6QQL5 | QHSKPCVGRGRVYAKFINTNVRTCNEPVPI DVKKEPENQ    |
| Q9Y508 | RKNFFLSKIRSHVATCSKYQNYIMEGVKATIKDASLQPRNV   |
| Q9ESP1 | GGASKASAGLVTCGSVLKLLNTHHKVRLHSHDIKYGSGSQ    |
| Q86TL2 | FANVYLADLTEEDPCSLYLINFLLDATVGMLLIYVGVRAVS   |
| Q2KIJ1 | TKEEDDGLRKS LDKFYEVFGNPQPASGNSLSTVCQCLSQK   |
| Q91VT4 | NRDSSLVTRKTEDMISQLHTNLLGSMLTCKAAMKTMIQGG    |
| Q9CPQ5 | LNYLKDVSKMLKMEKAQERANEESLASLQEEIDKIVETTES   |
| Q8IZU3 | LKTIKQLYEQFIKSMEELEKNHDNLLTGAQNEFKKEMAMLQ   |
| P70190 | RRDLPVTRTLIDWQRILSDNLNLMYPKLGVIYSRSLVCNW    |
| Q9H3L0 | NRARLVSYLPGFCSLVKRVVNPKAFSTAGSSGSDESHVAAA   |
| Q8BVD7 | SAFSVGITTSYPEERLPIIFNKVLFNEGEHYNPATGKFICA   |
| O95567 | GLPTEGYQALYHAVVEPMLWNPSGTPKRYSLLELGAIKQKL   |
| Q9CY28 | YGYRAPEDFVDMVETYLKERNLKR TFLLVDSVVGITKLDN   |
| Q3KRB8 | AVIFAPNLLQTSEGHEKMSSNAEKKGVYQTL SWKRYQPCWV  |
| Q7SIB3 | FSTMPFLYCNPGDVCYASRNDKSYWLSTTAPLPMMPVAEE    |
| Q96ES7 | LHQLIKQTQEERSRSEHNLVNIQK THERMQTENKISPYIRT  |

|        |                                            |
|--------|--------------------------------------------|
| Q5E951 | LTDFKPGYWIGIRYDEPLGKNDGSVNGKRYFECQAKYGAFV  |
| Q6IPR3 | MVTEEYIDFLLNVANQKMEENKKRIERFYNCLOHALERETM  |
| P11019 | SDADVQKQIKHMMAFIEQEANEKAEEDAKAESEEFNIEKGR  |
| A6NM15 | IVDSKYGLKHLTEEKPDGLINEATRQVALADIILINKTDLV  |
| O35565 | SSSSSSSFSSPSSAGRHVRSYNHLQGDVWRRLFSFTKYFLT  |
| P20774 | NQLLKLPLVLPKLTFLNAKYNKIKSRGIKANAFKLNNTLF   |
| P09564 | MHRLQLSDTGTYTCAITEVNVYGSGLTLVLVTEEQSQGWHR  |
| Q2TBN9 | EEVQEEDFVLQVAAPPSTQVNRVMYTRDLNDLMKYSAFQT   |
| Q5T0U0 | KRDFVKLKTMKKEELMQDLQNPGGNRITQVQEDITNLKDKI  |
| P81126 | AEAERVKASHSFLRGLFGGNTRIEEACEMYTRAANMFKMA   |
| Q3SZC2 | FDGGVVVGSDSRVSAGEAVVNRVFDKLSPLHQHIYCALSGS  |
| A6NN92 | NEALHFICDPDKREVNLFYCYNQFRPITPQVSFSALQLVIVL |
| A4FV84 | LRKCVDTYKYLFIFFSVANMRNSKLDIRNAWKHSRMFFGKN  |
| O95150 | ALHWEHELGLAFTKNRMNYTNKFLIIPESGDYFIYSQVTFR  |
| Q9D0B0 | PFAFVRFEDPRDAEDAIYGRNGYDYGQCLRVFEPRTYGGR   |
| Q8BPB0 | QEEAHLNTSFKHFIFFVQEFNLIDRRELAPLQELIEKLTSK  |
| Q2TBU3 | ENLMGSVRKDIESYKSGSGVNNRTELFKEHDHLRNSDRL    |
| Q864V4 | QLPCEDPADGSGRAPVLRVGNDAGLADLHQPRYCNAPLPG   |
| Q8JZV9 | VHGTILDCEEKDWDFSMNLNVRSMFLMIKAFLPKMLAQKS   |
| Q6ZWI9 | VGEVKSWSLGVCKEPADRKSNDLFPFHGFWISMKAGAIHAN  |
| H3BNL8 | TNSYLLLFKFTCYVLSVMTCNLSCVKELKDHSAKYHLQM    |
| Q9UBS3 | SFNFNDDLFKDFGFFGQNTGSKRFFENHFQTRQDGGSS     |
| Q8K201 | ESRRFRGFQDSVEVVKLPPPNREDSHFHLLIFAFCAAVV    |
| Q0P5C7 | ITSQEEVQEKYVVCVLFIFRNLLDMVRYTYSMLSVIGISYA  |
| Q9WU03 | NITDGSCQPFVYGGCEGNGNYSKEECLDKCAGVTENTTD    |
| Q9ERS4 | SALHRLPQRRRTYSDTDCNDVPPEDPERPLHCSGNTLNG    |
| Q96E22 | QQQELGLDCSKYSPEFANSNDKDDQVLNCHLAVKVLSPED   |
| Q9Y399 | YRKGIIILFISRRNRQFSYLIENMARCCEYAHTRYFRGMLT  |
| P30931 | EWEKPKINHVVTVQISPRLGNWKNCFYTTNTECDVTDEIV   |
| P30280 | SVKPELLEWELVVLGKLNLAAVTPHDFIEHILRKLFPQQ    |
| P49895 | EAHASDGFWAFKNMDIRNHQNLQDRLQAAHLLARSPQCPV   |
| Q9JKX8 | EILNAYLVRVGNNGTCFWDPNFQGLCNPLTAATEYRFKYV   |
| Q6NZA9 | NPSMIGPKNILITSMVSSQNTATDSNPLKRXHDDDDNDT    |
| Q9CWQ0 | FWTDTWREPESFFDKVKNRANGMHTLCLLDIKVKEQSLLENL |
| A6NJI9 | PKSPFKQKPAQRVPSDFAFANNVDKTVLDDPEDAVFVRSMK  |
| Q9Z211 | TVKNFCDILIPNLQLGIYKSNLGVVGLGLISSLAGLLTVV   |
| Q9H902 | LVQAKDRSYDALVHFGKRLNVAATAAVMAASKGGALSER    |
| Q1LZ95 | DDLDERQVQLMAEMCILVDENDRRIGAETKKNCHLNENIER  |
| Q9WTI2 | CMFAENGLLFLFETSALDSTNVELAFQTVLKEIFAKVSKQK  |
| Q15014 | AKKNVDALIEEYANCKKSQGNVDNKEYAVNEVVAGIKEYFN  |
| Q86V35 | IPEDELEEIREAFKVFDRDNGFISKQELGTAMRSLGYMPN   |



|        |                                              |
|--------|----------------------------------------------|
| Q6PHW0 | EDADEWQESEENVEHIPFSHNHYPEKEMVKRSQEFYELLNK    |
| Q3T040 | AEEQATVERNPYTIFHQALKNCEPVI GLVPTILKGGHFYQVP  |
| Q3ZBL4 | IDSMKPKLAPLHEGGAAELLNKEIIRLQEBENEKLSRLKTI    |
| Q9BXY4 | EAI PDSKSLESSKEIPEQRENKQQQKKRKVQDKQKSVSVST   |
| Q08DT6 | GEEKVKSGASWTCQQLRNKSNEDLHKLWYVLLKERNMLLTL    |
| O55100 | VSWVFSIVVFGSIVNEGYLNNPEEEEEFCIYNRNPACSYG     |
| A2VDU1 | LTILPIDQMKTSHVENDYIDNPGLAPPSGPKRTRGGAPELA    |
| A6NDL7 | QVKELSWGVALDTNFRSSNNFDYILAADVVAHPFLEELL      |
| Q1LZB9 | VVCRAAPCPAPSSPGQELCGNNNVTYLSCHLRQATCFLGR     |
| Q8N2K1 | DYLRKKDFVPYICAEPLFSNILEWHYVVRGPEMTPYEGGY     |
| Q6URK8 | GVPNKPLQCLDITATGQKLRNRYHEGLAPIAPGINRVDWP     |
| Q6ZTC4 | PPTLVPGGSPGTEAQFVAPANALGSRSKNLNTQPSCLSSGS    |
| P10649 | RKHHLDGETEERIRADIVENQVMDTRMQLIMLCYNPDEFK     |
| Q8N7P3 | CLTNYLPHWKNLNLNEMENWTMGLWQTCVIQEEVGMQCK      |
| Q96AH0 | SEPNDYRQGNKGAQSEQKNSMNSMNGTGTGFPVGNVGH       |
| Q921C1 | YVAHLGVRALALEGAALGVQYNLYGFKMSSTFICREDPCIGS   |
| Q9Z1B5 | VQKYGLTLTTTDPelikYLNNVVEQLKEWLYKCSVQKLVV     |
| Q71SS4 | WVILGFNYIIGGSVINELIGNLVGHLYFFLMFRYPMDLGG     |
| Q2PT27 | GIEIRHCRAQGSDFRGSFMNMITTRTWFC SAYITNTNSY     |
| Q0VCQ4 | LAALTRPVSEVTLQTVRGRQNDHGQCMAYAAVVRHFATKK     |
| Q9P0N8 | LWTLVSFRYHCQLYSEWRKTNQKVRKIREADSPGEPQHSP     |
| Q91VJ5 | DRSHEKADRNEHEKDRERERNYDKVDREDRDRERERAFDK     |
| P62955 | FFILSGLSLVVGLVLYISSINDEVMMRPSSEQYFHYRYGW     |
| A4FV75 | GVTLSNLEQLLRGVWKPETNEILHMSFPTKASLYGAILFT     |
| Q13007 | FSTLANNFVLIVSQLQPSQENEMFSIRDSAHRRFLLFRRAF    |
| O35566 | I IAGILAYVYVYQQLNTELKENLKD TMVKRYHQSGHEGVSSA |
| Q8VI88 | ILCYLNHKNYWSLIMSSTTINTACSSSLGPESLVSPSQTFSS   |
| Q9WTY4 | VGAIAGAGILYWLAPGNARGNLAVNALSNNTTPGKAVVVEL    |
| Q62393 | KNYLYLSPSGNTSPPGSPTQNVGLLKTPEVAEEGEDAVTML    |
| O35621 | ALLRLPKKRGTFIEFRNGMLNVSPIGRSCTLEERIEFSELD    |
| Q9JHQ5 | RSEFQKTLNDKTENQKSLEENLAAAKHDLRLVQEQLSMAEK    |
| Q5E9J3 | IEGETLAIQVQDTPGIQVHENGLSCTEQLNRCIRWADAVVI    |
| Q9BQP9 | EWFSANISLEFDLELRPSFDNNIVKMAHMSIVVEFWLEKD     |
| Q6ZUJ4 | HTSIRTIEELAGKIEFENELNHMCGHCQDSPFKEEAWALLM    |
| Q64669 | GWFERVLVAGFAYTYAAMYDNGPFQNKKTLLSITTTGGSGSM   |
| Q58D49 | VCRAERRVPLVQTGETDANVVKFLNRLSDYLFTLARYTA      |
| Q9H8T0 | ARLFDQPKIEDPYAISFSFVNPSVHDEAREKMLTQKKPEEQ    |
| Q8BWP5 | VFRVSLITSELIVQEVETQRNGVKAIFDLEGWQVSHAFQIT    |
| P18469 | RWFRNGKEEKTGIVSTGLVRNGDWTFTQTLVMLETVPQSSEV   |
| Q8VC52 | NGIRFDPENPQTLRLEFAKANTKMAKSLIATPNPTSVHPA     |
| P52797 | STSHSGEKPVPPTLPQFTMGPNVKINVLEDFEGENPQVPKLE   |

|        |                                            |
|--------|--------------------------------------------|
| Q8BX65 | HTRMSGNGIPIHGAKHVSVENHKISAPVQSQKMRKIQSSLS  |
| Q3ZBL4 | DLSDLNTVAALKSEFQKTLNDQNTENQKSLEENLATAKHDL  |
| Q9Y6N1 | VKDRIKIKISFNADVHASLQWNFRPQQTEIYVVPGETALAFY |
| Q8K354 | DTLTEVDLVDLMKKFVEDTKNEVHEREGWPDAYSAGVSKLGV |
| Q8SQ24 | LGKKISVPRDVMLEELSLLTNRGSKMFKLRQLRVEKFIYEN  |
| P00492 | CVLKGKGFADLLDYIKALNRNSDRSIPMTVDFIRLKSVC    |
| Q8NFX7 | RQVNGIDPNGDSAEFDLLFENAFDQWVASTASEKCTFFQIL  |
| Q9D387 | EVFVVDHAYTLRMLFVKESHNTSKGPEATWNLNKVHFVYDS  |
| Q0IIL5 | RIQKEDFWHSYIDYEICHTNSMCFMTKTSVRRRYREFVW    |
| O55100 | DIGVSAFWAFFWVFGFCFLANQWQVSKPKDNPLNEGTAAR   |
| Q3UG98 | PYRTRKAEFVTATLSEQKSWNCPLPRPDGCMGDTSAVSSVC  |
| P01881 | KEPDMFLLSECKAPEENEKINLGLCLVIGSQPLKISWEPKKS |
| O88452 | FVTLALVFATLDPAQGTSTNPPPEGPQDRSSQKGRSLQN    |
| Q3UFS4 | RNRQKSVKEEERERRDIGLKNALGCENKGFALLQKMGYKSG  |
| Q9P0W0 | TQPMKRDIKKAIFYEMSLQAFNIFSQHTFKYWKERHLKQIQI |
| Q7TNV1 | VCLGKILIQYKQHTLLHKVNGALMLLSFLCCRVLLFPYLY   |
| Q99463 | LRRRNAKVDKKKENEGRLENKRINTMLISIVVTFGACWLP   |
| Q8WUB2 | DGYKVNSHIAKLQELWKTQNTIHLKSKMMEASFFKHFDL    |
| Q3T054 | YIQAQCAIIMFDVTSRVTYKNVPNWRDLVRVCENIPIVLC   |
| Q5E948 | ITDHIAQGFDPNTEESPKRKNITYEELRNKNRESYEVTLTH  |
| Q9D176 | GEDLETVQAAYLGLKGNHNNSSSVGGGNGGPPSGGGKPGI   |
| O09164 | VVVHAGEDDLGKGGNQASLQNGNAGRRLACCVVGTSSSAAW  |
| O02659 | YIRLATSERATLQSELNQIKNWLIFSLGKRVGKKAFFTINGK |
| Q91ZT8 | GEQRGRSDRPGGSPHLPFLSNPLMGDVVSDWSPLHDAAIHG  |
| Q5TBK1 | RALIFSTDDFFREDGAYEFNPDFLEEAHEWNQKRARKAMR   |
| Q9ER80 | FQELMQEEKPGAKWSLHLDKNIVPDGAALGWRQHQQTVLGR  |
| Q9QZ28 | CFKERTRHLLREWYLQDPYPNPSKKRELAQATGLTPTQVGN  |
| P13621 | QIYGIEGRYATALYSAASKQNKLEQVEKELLRVGQILKEPK  |
| P09056 | LLLVLHWKHGAGSPLPITPVNATCAIRHPCHGNLMNQIKNQ  |
| Q08DG5 | SACKEPVVYPWMRKVHVSTVNFNYAGGEPKRSRTAYTRQQV  |
| Q5U4N7 | ERALISLKNRSRFLVRPNTRNRAFSWTCRAARSKPRPRRST  |
| Q9JMG4 | TALERQVDFDLGYQWAPILANFTHIIVVILGLFGTIQYRPR  |
| Q9H3R5 | IRQNLQMEIKITTVIQHVFNLLILGSKVNAEDPALKEIVL   |
| Q0IIL2 | LPLSILIAMGALLLCLIGMCNTAFRSSVPNIKAKCLVNSA   |
| Q5VVY1 | LYLLEKIPLVKLYALTSQVINGEMQFYARAKLFYQEVPAE   |
| Q9Z0G4 | GPSGRGAVCLFEEDDGSCENVGRRYLDGETFKPNCRVLCRC  |
| P97930 | ETGTFQKQVLLCFQQLMEEKNLNWKVVDASKSIEEVHKEIR  |
| Q7Z5L3 | KAQPPGPSTAALEVMDLSANPPPPFIQGPKGDPGRPGKPG   |
| Q08DP3 | VNENSDTVGQIVQYIMKNEANVDILAAMVEDNNVCDPESPV  |
| Q922M7 | EFLLLLEQKNIAVENEVRVKNLDLTDLYVQHAIPLPQRDL   |
| Q9P015 | PIPKRMLPPEELVPYYTDAKNRGYLADPAKFFPEARLELARK |

|        |                                            |
|--------|--------------------------------------------|
| Q1LZE2 | DIQTPESPGQGEPIPSELRENSLPSCSLHTSTPKSPEPGPV  |
| O35426 | TSWTLSCFSNVLPQSLLVWRNSQRSTQKDLVPYQPPFLCQW  |
| Q9NY12 | LGEFLHPCEDDIVCKCTTDENKVYPYFNAPVYLENKEQIGKV |
| Q3MHP2 | NLSFIETSALDSTNVVEAFKNILTEIYRIVSQKQIADRAAH  |
| Q9NPE2 | GHSVSGSLLMPGHEASSKDPNHSTALKVIESDTHRTNTPRR  |
| Q8R0A6 | EQGTEAAGSQVELLPDRDPDNDGTKISTVKVQGNDISHKLQ  |
| O88696 | QATDIAIQAEEMKLLKQLYNIYAKHTKQSLQVIESAMERD   |
| Q8CG50 | SLAEHYDILCAIETSAKSSNVVEAFTRVATELIMRHGGPM   |
| Q91V64 | VSERCKLRLVPLQIQLTTLGNLTPPSTVFFCCDMQERFRPA  |
| Q8VBT3 | ASYPQFWLGAHPAAVVTPGINVTLTCRAPQSAWRFAFKSG   |
| P49406 | VNELKVKMKPKFWSKRWERPNFNKIGIRFDLCLTEQQMKEA  |
| Q9Y272 | DLHRKVSQYCDVLHKKALRNKLLRAGSGGGGGDPGDAFG    |
| O60238 | HNNNNCEENEQSLPPPAGLNSWVELPMNSSNGNDNGNGK    |
| P12342 | VKQVTPAPEEHREKKHTDAQNTQPPEEADLPGHCEEPFPPW  |
| Q9QUN5 | LWVYVTATRYDRKSNEEIIDNLLSSSRHIHRVAKKMYKILD  |
| Q9NZD2 | RGLRFIQVFLQSIDGERDENHPNLIIRVNATKAYEMALKKY  |
| P09936 | IQAAHDAVAQEGQCRVDDKVNFFHFI LNNDVGHLYELDGRM |
| Q9BXS1 | RIWGEHEICYLLVRKNVTLNPDPSSETSILYLSQEELWEL   |
| Q5VZY2 | EIKEAFLAVSLALALNGVCTNTIKLIVGRPRPDDFFYRCFPD |
| Q91W82 | DYFFKPPKVTFRTRIYHCNINSQGVICLDILKDNWSPALTI  |
| P50296 | LDLQTLTEILQHQIRAI PFENLNHCGTMELSLEDTFHQI   |
| Q99612 | PPEDTLISFSCYNLETNSLNSDVSSSESSSSEELSPTAKF   |
| A0JN69 | LCHFRFAVERKPRPLVEWLRNPGPQHEKRTLFGDMVCFLFI  |
| Q8NBA8 | ARTLQEPVARPSGASSQTPNDKERREGGAVPAAAALGAEA   |
| Q9EQF4 | LGLWAVLPTLAGDKLLSVMNSKRHKQEPGPEDELYQECRP   |
| Q9QXN5 | EAVGMLDDLVDSDPDVDFPNSFHAFQTAEGIRKAHPDKDW   |
| Q08DH5 | SKLRETMPLPLKNQDDSSLLNLTPYPLVRRRKRFFGLCCL   |
| Q3T189 | SKIYPLPHMYVIKDLVPDLSNFYAQYKSIEPYLKKKDESQG  |
| Q32L19 | RKRKLEVLDSQLSEGNQKYANLQKSIEKAKVGRHETEERTM  |
| Q28151 | HTGEKLLCNECGKSFSQKENLLTHQKIHTGEKPFECKDCG   |
| P10301 | LFTQILRVKDRDDFPVVLVGNKADLESQRQVPRSEASAFGA  |
| Q28030 | HVQKLNKFLPEYNDSIQAQKNDVCRPGRYEYQPDNGVLNYP  |
| P50194 | SGTSVKAVDFIHYDEKNNEWLLQVKNRDNTESSSSKIRD    |
| P32972 | VQFPGLYFIVCQLQFLVQCSNHSVDLTLQLLINSKIKKQTL  |
| Q9NZ63 | EQQNKKDSETSFVPTNMAVNIVQHNRFYHEELNAPIRRNK   |
| Q9EQC7 | CGPGKACRMLGGRPHCECVPNCEGLPAGFQVCGSDGATYRD  |
| Q99J99 | AEFSAQLDPSFIKTHEDIENLDARRFQVVDARAAGRFGGT   |
| Q00188 | DTDPVNATFEGYKALNVRRNLNIMAGDEINSRNFDTLVELIA |
| Q9H1Y0 | WHYPIGLLFDLLASSALPWNITVHFKSFPKDLLHCP SKD   |
| Q92520 | WVFCGGKGIKTKSPFEQHIKNNKDTNKYEGWPEVMEGCI    |
| Q3MHR7 | ADELLKRVYGSYLVNPESGYNVSLLYDLENLPASKDSIVHQ  |

|        |                                            |
|--------|--------------------------------------------|
| P30041 | KLIALSIDSVEDHLAWSKDINAYNCEEPTEKLPFPIIDDRN  |
| Q15286 | YKFAGQMGIQLFETSAKENVNVEEMFNCTELVLRRAKKNL   |
| Q3ZBM4 | AIEKCLKSEKSLGEGPLDLINYIDVAQQDQGLPFVPLEEEF  |
| Q76JU9 | LVLCHLGLALGLETSWLDNSTSSLGINIPVNGSPVCL      |
| Q9CRA5 | VLTTEKQNFLLFDMTHPLTNNNIKQRLIKKQEAVLKQW     |
| Q5VT99 | VHEDAFETLESQVLELNDNNLRSLSVAALALPALRSRL     |
| Q9ULY5 | QLPENFTELSYNYGSGSVKNCCPLNWEYFQSSCYFFSTDT   |
| A8MXV6 | KSIKTRLGRRVPAAPPALRRNLLLQAWKVCVNWASRLFAPN  |
| Q7TS99 | TPVSHKVIKRRDRINRCLNELGKTVPMALAKQSSGKLEK    |
| P00915 | DIKTSEKHTSLKPI SVSYNPATAKEI INVGHSPHVNFE   |
| Q91ZD6 | ECILINHDTGECRLEKLSNITVKKTRVEGSSRIQYRLEQ    |
| P45877 | MTVVHSIELQATDGHDRPLTNCISINSKIDVKTFFVVEIA   |
| Q17R06 | DEDSFQVKVNWVKELRKMLGNEICLCIVGNKVDLEKERHVS  |
| P32856 | VEEIRNSIDKITQYVEEVKKNHSIILSAPNPEGKIKEELED  |
| O14494 | LGETLSVYCNLLHSNSFIRNNYIATYKAIGTFLFGAAASQ   |
| Q80XD9 | NTEYNNLVLTRGGGECAYLSNRGIYSSGDIHKKWICKNPN   |
| P00435 | LGFPCNQFGHQENAKNEEILNCLKYVRPGGGFEPNFMLEK   |
| Q3ZBW4 | ARLVQGSILKKVLEALKDLINACWDISSSGVNLQSMDSH    |
| O94903 | HGLPPSETIAIVEHINAKPNLEFVGLMTIGSFGHDLQGP    |
| Q9DBJ1 | SLRGIVKHLEGLSEEAIMELNLTGIPIVYELDKNLKP IKP  |
| P56177 | LANGRALSAGSPVPPGWNPNSSSGKSGGNAGSYIPSYTS    |
| Q8C0Y1 | LHRYNAYPSEQEKLSSGQTNLSVLQICNWFINARRRLLPD   |
| Q5QGZ9 | RVDNI INSSAWVIRNAPDLNMYCGYINRLYVQYHCTYKK   |
| Q96DC9 | SLLGKSREIFKFKERVLTQPNDLAAGFEEHKFRNFFNAFY   |
| Q3ZBD9 | EKERDFYFGKLRNIELICQENEGENNPVLRIVDILYATDE   |
| Q17QJ0 | QRNILASNPRVTRFHINWDNNMDRLEATENQDSSLGCGLPL  |
| Q2KIV9 | GESGDYKATQKIAFSASRTINHHQRQGFIRFDHVITNANE   |
| Q9CWJ3 | PCYKTKQSPKSGGCDMANKENELACAGHLPENLRHDSRTFV  |
| Q3TT38 | LSSFETEFTQPHRKEVGNFNFASPPQKNRQSDENNLDPG    |
| Q9D8U4 | GKFVCSVPGIYYFTYDITLANKHLAIGLVHNGQYRIRTFDA  |
| P47756 | SLTRQMEKDETVSDCSPHIANIGRLVEDMENKIRSTLNEIY  |
| Q99JV5 | GRKIKLEGLSDVASISTKLQNTLIQYHSIKEDEWRVAKKVK  |
| O88441 | WPENATLYQQLRGEQILLSDNAASLAVQAFLQMCNLPVKVV  |
| P46777 | IVCAAYAHLPKYGVKVLGTNYAAAYCTGLLLARRLLNRFG   |
| Q5D525 | RLEKVEQRLQEAETWDSFGNCGLKTELEEELEGQSQRSPEA  |
| P21266 | WFAGEKLTQVDFLTYDILDQNRIFDPKCLDEFPNLKAFMCR  |
| Q9BTL4 | AEGAFPNLARVLQRRFSGLLNCSPAAPPPTAPPACEAKPACR |
| Q96L16 | MLKSERDALFDIDRERQGHQNRMRPLPKRVFLAVQKNKPI S |
| O75494 | RRRSRSRSDYNYRRSYSFRNSRPTGRPRRSRSHSDNDRFK   |
| P43528 | RSGGLIPRGQDEAYERGTPININLYDHARGTATGNTRYNDG  |
| Q99N05 | MLEFCIAVSVSFAFGCKASCCNSSEVLVLPNSAVTVTAPP   |

|        |                                            |
|--------|--------------------------------------------|
| Q5VWW1 | GEKGEPRQGLPGPPGAPGLNAAAGISAATYSTVPKIAFYA   |
| P36542 | FNKFRSVISYKTEEKPIFSLNNTVASADSMIYDDIDADVLO  |
| Q95IE3 | RWFRNGQEERTGVVSTGLIHNGDWTFTQTLVMLETVPRSGEV |
| P30280 | VDPVRRVPRNLLLEDRVLQNLITIEERYLPQCSYFKCVQK   |
| Q2YDG7 | QDPSLAREGEGEPEGDEEPENDSETEKEPQAEAEEDDSEGIG |
| Q3T0B6 | KEVSFQATGESDWKDTNYTLNNTDSLWDGLYDHLMDFLADRG |
| Q9D753 | VKAEFAAPPVDAPDRGYVVPNVDLPLCSSLRFRTPGPPGEEA |
| Q9JKK0 | SPPASPPVGWKQSEDAMPVINYDLLCAVSKLGPGEKYLHA   |
| Q8NCW5 | STVVKYLSQEEAQAVDQELFNEYQFSVDQLMELAGLSCATA  |
| Q8BGF6 | KTDFRGMGILGLINLVYFSENYTSEAHQILSRSNHPKLGYS  |
| P56856 | VSIFALKCIRIGSMEDSAKANMTLTSGIMFIVSGLCAIAGV  |
| Q9D7I8 | NHTEDEELLWYREDGIVDLKNGKNINISSVCVSPINESDNG  |
| Q9NVK5 | ASRHILEAPQHGLERRHLEANQNELQAHVDQITEMAAVMRK  |
| Q58CX6 | RVEPHQLAIDRPSQKLLKFLNKHYNLETTVPQVNNFVIFEG  |
| P16015 | PMTVSSDQMAKLRSLFSSAENEPVPLVGNWRPQPVKGRV    |
| Q9H008 | DTSNPNCVVIADAGESFSYQNMNNAFQVLMLEKPVLI SLG  |
| O14893 | WKKFCLGEKLCADGAVGPATNESPGIDYVQIGFPPLLSIVS  |
| Q15014 | NVDAILEEYANCKKSQGNVDNKEYAVNEVVAGIKEYFNVML  |
| P0C7V0 | SHQGWKNTRCATRGLVNTLVNTGHFLYLOPPAPLIMPYLDD  |
| Q9D8B3 | TIEFQREALENANTNTEVLKNMGYAAKAMKAAHDNMDIDKV  |
| P12980 | AFAELRKLTPHPPDRKLSKNEVLRAMKYIGFLVRLLRDQ    |
| Q6P8M1 | IETDAPWCVKSTHAGSKYINTSFPTKKKWENGHCLKDRNE   |
| P09586 | KLSQLQPCSFSGALLLAVSNLLVWEKVTSLPNYRLPTESL   |
| Q8BGU2 | GAVLALLLLLLPACCPVRAQNDTEPIVLEGKCLVVCDSPPS  |
| Q9DCH6 | GNPRTNGMCSVCYKEHLQRQNSSNGRISPPAASVSSLSSEL  |
| O43692 | MIAILDYHNQVRGKVFPPAANMEYMWVDENLAKSAEAWAAT  |
| P57776 | SGPGGDHSELIVRITSLEVENQNLRGVVQDLQQAISKLEAR  |
| P97805 | EIPDSTLVLVASYDDPGTKMNDKIKTLFSLNLSYAKQLGF   |
| Q8N8I0 | EGIKLQIEGEGVESQSIKNKNFQKVPDQKGTPKRLQAEAEET |
| A4IFN5 | LGFLTFIWWMFCLTAVYFHNLSQKVFGTLFGLLWYGYTYG   |
| Q9CQE8 | LAVRLEYGDNAEKYKDLVPDNRKNTDNAAKNAEPLINLDVN  |
| Q7Z7J5 | CSRKRKAVTKRARLQRSYEMNERAEETNTVEVITSAPGAML  |
| Q9BQ13 | IFGEQVSRKQFLQVPGYSENLELMVRLARAEAITARKSSV   |
| Q05433 | ADQTRYIFRGDKDALITITVTNNDKERTFGGQAWVDNIVEKD |
| Q9NUN7 | WCEENYSVTWYIAEFWNTVSNLIMIIPPMFGAVQSVRDGLE  |
| Q9Z2X2 | AASAGRDEIVKALLVKGAHVNAVNGCTPLHYAASKNRHE    |
| O43482 | HFCLSSDKMVCYLLKTKAIVNASEMDIQNVPLSEKIAELKE  |
| Q96IL0 | RFCPPRKSCHDWIGPPDKYSNLRPVHFYIIPENESPLEQKLR |
| Q13268 | PGIIKTDFSKVPHGNESLWKNFKEHHQLQRIGESEDCAIV   |
| Q8N7C4 | QKHLGNGSCTEITPKYRGASNIINNFIICWSFKIVLFLSFI  |
| P08311 | FVLTAHCWGSNINVTLGAHNIQRRENTQQHITARRAIRHP   |

|        |                                            |
|--------|--------------------------------------------|
| P09023 | RIETIAHALCLTERQIKIWFQNRRMKWKKESKLLSASQLSAE |
| B1ATL7 | CRGKLAHVSPFLRGPCHPMHNWPRPIPLSSSTPGLPSCSTV  |
| Q8VDV8 | SSGLEEIKQSLGSHGVVLEINYSSSIHDREIRFNNGWMIKI  |
| Q6P7N7 | LVKNLRLVKRLYFGLRVLPPNLVNLNFHQSLTEDQKLI DEG |
| Q32L47 | SMIPIHLLIMNKASSEFEENLHRFQEAAKLFQGRRQNHEA   |
| A5D7C9 | LVALCLASFGMTLLGNFQLTNDEEIHNVGTSLTFGFGTLTC  |
| Q91WE2 | IEKQRREEEELKEYSNLNKVGI SAENKEVEKKLAVKPI    |
| Q9DAP7 | RVTRFHINWDNNPDSLEAIENQDPNVDFSLSLCTPVKSLG   |
| Q9CQE1 | LRTAHSEMIGYWTVEFGGRTNRVFIWKYDNFAHRTAVRKA   |
| Q645M6 | HSVSAGLSSSDLTQLKFLCQNHISKRKELELAQSGLDLFTVL |
| Q9WV55 | YDPNEKSKHKFMVQTI FAPPNISDMEAVWKEAKPDELMDSK |
| Q8BS03 | YTMVWATSNRIGCAIHTCQNMNVWGSVWRAVYLVCNYAP    |
| Q8BWR2 | NIPQMSFDDTEREPEQTFSLNRDITGELEYATKISRFSNVY  |
| O95865 | DGVRKALQDLGLRIVEIGDENATLDGTDVLFRTGREFFVGLS |
| P10629 | YDYGNSFYQEKMDSLNCRQNTLGHNTQTSIAQDFSSEQGR   |
| Q9WTL2 | RWLKELYDHAEATIVVMLVGNKSDLSQAREVPTEACMFAE   |
| P61588 | ALQSENSVRDIFHVATLACVNKTKNKNVKNKSQRATKRISH  |
| A2AFE9 | RHPLTLTPAIEEESLATAEINSSEGLSESQSKGHDSINMSQ  |
| D3Z690 | INTWHKQDEKMRTPAFLSQNIKCLEPQHLVNLTKLVSEC    |
| Q08DD7 | CVQGRSPVSVSDAILRYAMSNCGWAQEERRGSSHLAEGDQP  |
| O35164 | KRECTQQIKVEKYILPPNYNVSSKFNDIVLLKLLKQANLT   |
| Q28035 | DIHLVELLYYVEELDPSLLANFPLLKALKARVSNIPAVKFF  |
| Q9JTT2 | RCLRVIYAGLIGTVVTPNYLDNVSARVAPWCGCAASGNRREE |
| Q08DC7 | ADQPPSMSSHDAAPPAPRRNPCCLCWCCCCSCSWNEERRR   |
| O35949 | IFVHWYHHSTVLLFTSFGYKNKVPSGGFMTMNFVHVSVMY   |
| P62753 | DTTVPRRLGPKRASRIRKLFNLSKEDDVRQYVVRKPLNKEG  |
| Q9P126 | VGLVALGIWSVMQRNYLQGENENRTGTLQQAKRFCQYVVK   |
| Q64368 | ESQINFHGKLLKLGPAIRKQNLCTYHVQPRPLIFNPPPPQ   |
| Q13156 | RDTTVESVPVSPSEVNDAGDNDESHRNFIQDEVLRLIHECP  |
| Q86UF1 | CGGISYKDWSONMYFNCSNEDNPSRERCSVPYSCCLPTPDQA |
| Q9NUM4 | ENITAQVQFSKTVIGKARLNNITIIIGPLDMKQIDYTVPTVI |
| P20339 | AKTSMNVNEIFMAIAKKLFPKNEPQNPANSARGRGVDLTEP  |
| P63032 | RKVYNIHGDMYQLDILDTSGNHPPFAMRRLSILTGDVFIIV  |
| Q2NL33 | LFSAYEYAQINESKGCAYFQNGNIYISRCSAEISWICEKTA  |
| Q921K9 | FPSDASANSSLLLEFQDENSNQSSVSDVYQLKVDSSSTNSSP |
| Q9NX20 | LHWGHFEMMRLTINRSMDPKNMFAIWRVPAPFKPITRKS VG |
| O00212 | FADGAPPESTPTVFERYMVNLQVKGKPVHLHIWDTAGQDD   |
| Q9XSK7 | YPHWPARIDEMPEAAVKSTANKYQVFFFGTHETAFLGPKDL  |
| A5PJG7 | YVQCPITGAKAANKENLDPSNLMPPPNQTPAPDQPFPLSTV  |
| Q14201 | FPPLPMWHPLPRKKPGMYRGNGHQNHYPVFFGYPNQGRK    |
| Q3LUH2 | QWIDQTPYKENVRFWHQNEPNFSAEECASVFWDGRGWGN    |

|        |                                             |
|--------|---------------------------------------------|
| A4FV54 | IEEHASADVEKMILGNKCDVNDKRVQSKERGEKLALDYGIK   |
| Q9D0E3 | DEIGSSSGRRKNRSGSGRPNGTGLPPHQETSTPSHDLASAS   |
| Q2LGB5 | GALGTVGRLSVTVVQAKLAKNYGMTRMDPYCRLRLGYAVYE   |
| Q00169 | WGLQNKVENFIHKQERRLFTNFHRQLFCWLDKWVDLTMDDI   |
| Q9GZN7 | VYINLNLKCLTVYQLHALQPNSTKNFRPAGGAVLHSPGAMF   |
| Q8BS03 | KARRKRYISQNDMIAILDYHNQVRGKVFPPAANMEYMWDE    |
| Q8CGZ9 | PLKSPKTEKEAKRISLPDFMNMILSILRAWDNPLHHMETEL   |
| A6NLW8 | REELAKEIGVPESRVQIWFQNRRLRLQKREPVASLEQE      |
| Q1JQA4 | VQNVIVYRGCTNAVLMWFTDNYTIMAGVLLGILLPQFLGVL   |
| A6PWV3 | KDEFYRLGNETWKGVFIIQGNLLEIRQNLEKKTQIIKNFS    |
| Q9QZ28 | LGRFLWSLFPVAPAAACEALNKNESVLRARAIVAFHGGNYREL |
| P25402 | VQEIPPAKPGDGGSLSLAINNRVKLIYRPIALKNGRDEAEN   |
| O08584 | ESELKISSPPEDSLISSSFNYNLETNSLNSDVSESSDSS     |
| Q9R0P9 | SVPSACALLLFLPLTAQHENFRKKQIEELKGQEVSPKVYF    |
| Q92522 | YSIKALVQNDTLLQVKGTGANGSFKLNRRKLEGGGERRGAP   |
| Q9MZ13 | FGIAAKYKLDCRTSLSAKVNNASLIGLYTQTLRPGVKLTL    |
| Q56P03 | LRKASENRKKRRVHKKMRSNREDAEKAETDVEEYIHPVM     |
| Q99967 | PQHAFNALMGEHIHYGAGNMNATSGIRHAMGPGTVNGGHPP   |
| Q8K015 | AAAHLQTDVQRFLFRLWEYLNAYAGRKYQADQLESDFCDVL   |
| Q8ND25 | DSERAPGGGGSASDSTYAHNGYQETGGGHRDGMLYLGSR     |
| P50135 | VVEPSAEQIAKYKELVAKTSLNENVKFAWHKETSSEYQSRM   |
| P51157 | IDLEHMRTIKPEKHLRFQENGFSSHVSFAKTGDSVFLCFQ    |
| Q9NRH1 | GDVFDDEADESLLAQREWQSNMQRVKEGYRDGIDAGKAVT    |
| Q13145 | AGGLILVLLIMLALRMLRSENKRLQDQRQQLSRLHYSFHG    |
| O35326 | KDFMRQAGEVTFADAHRPKLNNEGVVEFASYDLKNAIEKLS   |
| P43528 | PNSCLPNNKASSDTTCASLTNKLSDHDLADFKKYIKRKFLL   |
| Q9BRV8 | YKPHILLSQENTQIRDLOQENRELWISLEEHQDALELIMSK   |
| Q6UWN0 | HNQLLADFHIGSIVKTEVLNILEKSQIVGAASSRQDPAWG    |
| Q8WU03 | DNKEGNFSNMFLDASHAGLVNEHWAFGKNERSLKYIERCLO   |
| Q96BX8 | TALSAPRYMDLLMDWIEAQINNEDLFPNTVGTFFPKNFLQT   |
| Q9WTP6 | ATMDAGKLVSDMVEVLEIKNLETSPCKNGFLLDGFPRTVR    |
| Q9CY45 | IFEYDRRFAIYGDEFIFYDYNHPELEPERIAAHSFDLVVAD   |
| Q2YFS2 | GVLRIINLKESDQAQYFSRVNLQSTEGMKLWQSIPTQLNV    |
| Q99436 | KNLVSEAIAGIFNDLGSNSNIDLVCVSKNKLDLFLRPYVTP   |
| Q9D1C9 | HRVRQGTQSTWPPDRTLFILNVPPYCTQESLSRCLSCCGTI   |
| P31955 | QNFCIHGECRYIENLEVVTNCNCHQDYFGERCGEKSMKTHSE  |
| O95744 | TVSVKQLFSTLPVRHKEFQRNIKKKRACFPFAFCRDCQFLE   |
| Q9CPX5 | SKKRTELIPTSNSEIESTQKNQAVEGNPRPRPGDLIEIFRI   |
| O75323 | PNIYELRSYQLRPGTMIEWGNWYWARAIRFRQDNEAVGGFF   |
| P43430 | GNPSENKATGKGDSGGPFVCNGVVQGIIVSCLCTGTLPRVF   |
| Q03255 | PRRRAKRPQKSLPADSSILCNPMHVETLHPFTYRDGCAKTT   |

|         |                                                                     |
|---------|---------------------------------------------------------------------|
| P09611  | PGNCRIPLQSLFERATLVASNNYRLAREMFNEFNKQFGEGK                           |
| P16562  | AFTALLTTQLQVQREIVNKHNELRKAVSPPASNMLKMEWSR                           |
| P31947  | TNPIRLGLALNFSVPHYE IANSPEEAISLAKTTFDEAMADL                          |
| P04973  | PPGIPDAVDGVTNGDYQESNGPTDSYAAISQVDRLQSEPE                            |
| P70677  | VDAANLRETFMGLKYQVRNKNDLTREDILELMDSVSKEDHS                           |
| Q8BSA9  | QHALKRETI SN SHS K I KERN N P L C T H K N R R S Q G K A Q G P S T T |
| Q92520  | LLTFYVISQVFEIKMDASLGNLFARSALDTAARSTKPPRYK                           |
| Q9JII2  | QPHQSGTLLLLLLSNLLMWNVASVPRCIMEDGGCQKVLNY                            |
| P01246  | LPWTQVVGAFPAMSLSGLFANAVLRAQHLHQLAADTFKEFE                           |
| Q14847  | YDYSAADEDEVSFQDGDITVNVQQIDDGWMYGTVERTGDTG                           |
| Q5VWC8  | RLCQSVSLELLELHIYVGIESNHLLPRFLQLTERIIILFVVI                          |
| Q1ZZU3  | VSEGYSVDELEDHITQLHEYNDIKDVGQMLMGKLA VIRGVT                          |
| Q96B77  | QEDPKRWVGSSSPISKEKLPNAETEKFWMFYRFDAIRTFGF                           |
| Q3UC65  | SEKQTEDATKNTSEKSSTQRNIAFSSNNSVAKPLQKTTKAA                           |
| Q35565  | KLYGSKEFNNDCKLKERIEENGYNTYASFNWQHNGRQMYVA                           |
| Q9BYD2  | SVENVGVRGDLVSVKSLGRNRLLPQGLAVYASPENKKLFE                            |
| Q8BIG7  | GKRWPWPWGSRRQERLLPPEDNPLWQYLLSRSMREHPALRSL                          |
| Q9Z260  | NIVVFENRWEGLWMNMRHANIRMQCKVYDSLALSPDLQA                             |
| Q3ZBR0  | PLLTQTRLITQSALHRAPHYNSCCRKRYRPEAPRPSVSRPP                           |
| Q9UI95  | IFQKRKKYNVPVQMSCHPELNQYIQDTLHCVKPLEKNDVE                            |
| Q9D0B0  | EKDLEDLFYKYGRIREIELKNRHGLVPFAFVRFEDPRDAED                           |
| Q3T0C2  | VGFTRSAAMAANLMNSGVRLNAICPGFVDTPILKSIEKEEN                           |
| P0C7Q3  | YLAGKVEEQPLWAHDIISVSNRYFNPSSEPLGLDSRLWELR                           |
| Q9ES30  | RGYQGPFGPPGPPGIPGNHGNNGNGATGHEGAKGEKGDKG                            |
| Q50H32  | AIDGLSDSEGGQNGHIGSEDNEQEKDQDNLLVLARTASEKA                           |
| Q9D7I0  | CCGSCSNQYCCSDVLRKIQWNEEMCPEPESRFPSTPAEETPE                          |
| Q7SIB2  | GTAGSCLRKFS TMPFLFCNINNVCFASRNDYSYWLSTPEP                           |
| Q2HJI8  | AMGIMLVYDITNEKSF DN IKNWIRNIEEHASSDVERMILGN                         |
| Q2KIR7  | RKSLPMSLVYGTVMHMHNPNFLKALVDKWPDFQTVVIR                              |
| Q3LI81  | KSKNFETLERASSQCQCQSQNPESSSCRPLVNVAPEPQLLE                           |
| Q04744  | RKQLAHSLSLTETQVKVWFQNRRTKFKRQKLEEEGSDSQQK                           |
| P43528  | PININLYDHARGTATGNTRYNDGYVSTTTTLRQAHFLGQNM                           |
| Q8HZJ5  | FRDAMGFLMFDLTSQQSFLNVRNWSQLQANAYCENPDIV                             |
| Q14AM7  | GLHDVDLNTFITTEEMALHLDNGGTRKRRTSAQCGDVIDTSPT                         |
| Q6Z WV3 | FKFPGRQKIHI SKKWGFTKFNADFEFDMVAEKRLIPDGC GV                         |
| Q9BUV0  | DGTRNPNEKPTQQRSIAFSSNNSVAKPIQKSAKAATEEASS                           |
| P30042  | GFGAAKNLSTFAVDGKDCKVNKEVERVLKEFHQAGKPIGLC                           |
| Q8BHL8  | LRYESKDGARKLLLKAVSVENGMINVLELGTQQVADLTLN                            |
| Q9Z2U0  | SGGKNIELAVMRDQPLKILNPEEIEKYVABIEKEKEENEK                            |
| P10628  | KQPAVVYPWMKKVHNSVNPNTGGEPKRSRTAYTRQQVLE                             |
| Q64362  | FIRHGLYQDGVFKFTVYIPDNYPDGDCPRLLFDIPVFHPLV                           |



|        |                                                |
|--------|------------------------------------------------|
| Q9BQ24 | FLVTFGNSEKPEMTMTCRLSNQRYLFLDGDSDHYEIEIVHIS     |
| A2A5I3 | GHTV GALRMPNTTLVQGRPKNTAVWPLSGLGVPRHRRKRHI     |
| Q9D112 | SLSSLESHFPLSSSTTDPDSNSLNTEQKGSWDSENFWLDPS      |
| Q9NVZ3 | TAVESVTDSSRYFVIRIEDGNRRRAFIGIGFGDRGDAFDNF      |
| Q9Y696 | ADCNLLPKLHIVKVVAKKYRNFDPKEMTGIWRYLTNAYS        |
| Q8N0W7 | RAMRVAHLELATYELAATESNFESSHPGYEAMADRPQPGW       |
| Q5U649 | LTELF SRSMNTQIILMAVKNNYSIKDFFEQMLKIFKEMQSV     |
| Q9H2P9 | VLRATKLGIPYRVIHNASIMNAVCCGLQLYKFGETVSIVF       |
| Q1JQE1 | NGTVTGKGRGSHIVGLLTLNFGDGPDRNKQTQTFQAQVQGS      |
| O70514 | VCRKRFPE SNLKLVPNARGNTKPRKEKAEVSAREHNKVQE      |
| O14813 | SPLRPAFPAAGPPCPALGSSNCALGALRDHQFAPYSAVPYK      |
| Q9D5L7 | NNHESWGDWDLGRNRLYHDGKNQPSKTYPAFLEPDETFIVPD     |
| Q8BKE5 | MIPQIASFGLIRDRSHIQSANLDETAQAGTSSLQVMVDHHP      |
| Q1LZ83 | GHGPIVHNAEKILQYISHRNIREQQILTVFHENFEKSFTA       |
| Q5E9B7 | ICPGGQLPFLLYGTEVHTDTNKIEEFLEAVLCPPRYPKLAA      |
| O43704 | SPRIVKTHLPTDLLPKSFWENCKMIYLARNAKDVSVSYYH       |
| P01582 | HETCTDQFVSLRTSETSKMSNFTFKESRVTVSATSSNGKIL      |
| Q99N03 | VSRWQNLGPAQPAQKVAQPQNLVDPGHLEKALEGSDLLQKL      |
| P22794 | IIAVLFLICTFLFLSTVVLANKVSSLRRSKQVGRQPRSN        |
| P84751 | WFRQPPGKALEWLGLIRNKGNGYMEYSASLKRFTISRDN        |
| O75629 | PEMKTWPSSHNWFFAKLNI TN IWVLDYFGGPKIVTPEEYYN    |
| Q8C7V8 | AFFGDVLRFPKIVHHYFDHNSNWNLLIRWGISFCNQTVF        |
| Q3SZM1 | REWHMPFKRPSYPAVKRYNQNRSLVQKLRMEERFKKKEKLL      |
| Q9D0V8 | KIQMKMEKLSSTTKGICELENYHYREESSRPLFHTWPTAF       |
| P17981 | SPKRKSNFNCFYSGSTQAANVSSLGSRESCVSLFVLVLLG       |
| Q5JUR7 | FRLKEPVLVSVGSADEMCEKNLLEKVAQKMQAPHKIHWIEK      |
| Q8CHQ9 | TLYSFLFLCLWLIFWISCRNYVAKSLQADLADITKSYLNA       |
| Q32LD7 | MEATAAASLSYSSVDETQVQNLVVSCKSSGKVISSVYSRES      |
| P00847 | VTLIVLFPSSLFPPTS NR LVS NR FVTLQQWMLQLVSKQMMSI |
| Q9BR61 | LYHEETIREEDKNIFDYCRENNIDHITKAIKSKNVDVNVKD      |
| Q9H467 | PRGTIGDMMQKLSGQLSDARNKENLQPQSSGVQGVPI SPE      |
| P22692 | ERLAASQSRTHEDLYIIPNCDRNGNFHPKQCHPALDQQR        |
| P11226 | TCEDAQKTCPAVIACSSPGINGFPKGDGRDGTGKEKGEFGQ      |
| Q9UPY8 | KMGVDKII PVEKLVKGFQDNFEFTIQWFKKFFDANYDGKDY     |
| Q96CJ1 | ECILII NHDTGECRLEKLSNITVKKTRVEGSSKIQRKEQ       |
| P26838 | MAGNQGHRYDWSSFFFFYMNEEPAFKSVDAFQ RAGDTVI       |
| P33782 | SAVDNGQVITQGLADGRVMNLAAAYASAVSDFELRLPAEG       |
| Q58DM8 | GEKVFAAGADIKEMQSLTFQNCYSGGFLSHWDQLTRVKKPV      |
| P0C646 | GLHTWISIPFSFMYIVAVAGNIFLIFLIMTERSLHEPMYLF      |
| Q3KQJ0 | TVRLGAGRIDILSLKTCLLQNFSSLPRTWLSFQVCMRK         |
| Q6RXL1 | VEGPTAGDFYYLDGAPVNYTNWYPGEPRGRGKEKCV E IYTD    |

|        |                                             |
|--------|---------------------------------------------|
| Q13268 | AVILVSSIAAYNPVVALGVYVNSKTALLGLTRTLALELAPK   |
| Q6P1S2 | KESYYEKLKRTYEIWKDNMNNCSLILKFRELISRINFRRKG   |
| A8MXK1 | KPGTQANISQSHKDRVCTFDNGSIQLFSVGVDRDSGYVYVITV |
| Q8BVF2 | LARKFPDVKFIKAISTTCIPNYPDRNLPTVFVYREGDIKAQ   |
| Q86YI8 | IECNECHTWIHLSCAKIRKSNVPEVFVCQKCRDSKFDIRRS   |
| Q5E943 | YEPQLLADDDARLLQLETQGNHNCYNYLYRMKALDAIRASE   |
| O08734 | ETQGAAAPANPEMDNLEPNLSILGQVGRQLALIGDDINRR    |
| Q08331 | GSGYIDENELDALLKDLYEKNKEMNIQQLTTYRKSVMSLA    |
| P52803 | AIPDNRRSCLKLVFVRPTNSCMKTIGVHDRVFDVNDKVE     |
| Q9D270 | GRLPENPKIPHAERELWELCNKCNLMRPKRSHHCSRCHGCV   |
| Q9JHL0 | RQVWPGPQMDTAPNKSFERKNKMLFSHLEGPESPRYQNFYK   |
| P27701 | FAFLLLILIAQVTAGALFYFNMGKQEMGGIVTELIRDYN     |
| Q9Y6N3 | LKSSLVTLNNGYDGIIVTAINPSVPEDEKLIQNIKEMVTEA   |
| Q6PZD9 | DKAKRRIMETQQKQVLEYMAENERLRNRVQDLTQELDTLRNL  |
| Q3ZBE1 | SESGEEMLVFPQDTPVEVEQNTLDPDYLPEDESPTEQDKA    |
| Q2NL01 | MVLCTVMLFLLQLKFLPKINSFYTFEVKDANGRVVSLKLF    |
| Q9BTE7 | VFYQYLEQSKYRVMNKDQWYNVLEFSRTVHADLSNYDEDGA   |
| Q9QY31 | HTGEKPYTCSHCSRAFADRSNLAHLQTHVGTKKYRCAVCP    |
| P20160 | QSRQTFSSISSMSENGYDPQQNLNDLMLLQLDREANLTSSVT  |
| A6H7I7 | LPRPDSLIFYRQKRCKASVKNENAKGQGLVRRFLGSPRD     |
| Q2TBQ5 | GKKVAPAPAVVKKQEAKKVVNPLFEKRPKNFGIGQDIQPKR   |
| O14798 | KSSCTMTRDTCQCKEGTFRNENSPEMCRKCSRCPSGEVQV    |
| P06730 | IEPMWEDEKNKRGRWLI TLNKQQRSDLDRFWLETLLCLI    |
| Q58CY6 | ALGKPVREVAAKAKAVGIQGNLSGDLQSGGLLVVAKGGDK    |
| Q2KIR7 | LFGGNERSLRFIERCIQSFPNFCLLGTEGTPVSWSLMDQTG   |
| Q9QZL9 | DFRDLPRNFHQEENQEHMGNHTLSSHLDIKVTDNQTGEV     |
| P43464 | RMSKAALLLDNSYQISQISNMIGFSSTSYFIRLQVVKHFGI   |
| P30301 | EIFLTLQFVLCIFATYDERRNGQLGSVALAVGFSLALGHLF   |
| Q6F5E0 | AHGGATDAPGLAGTPPNASANASFTNEHSTPRLLASAASAP   |
| Q9ET43 | LPLSIVIAMGALLLCLIGMCNTAFNSSVPNIKAKCLVNSA    |
| Q9NWZ8 | SCFNLPWYLPSALLPQSSYDNEAAYPQSFYDHHVAWQDYPC   |
| Q9HD33 | LRNKSNEDLHKLWYVLLKERNMLLTLEQEAQRQLPMPSPPE   |
| Q9DB98 | SGPVDLFRELLLEERKGVPRGNKEHEEERREKERQEALGI    |
| Q6ZUL3 | LLWGCLMPRAQPLLVHTAYENTGHWERLASVVSSTQOQPTV   |
| P08831 | ANNTEEEI IKPRSAHYSFQSNVKYNFMRVIHQECILNDALN  |
| Q9UPY8 | KSKKLIGTAVPQRTSPTGPKNMQTSGRLSNVAPPICILRKNP  |
| Q9CY21 | LITTQATRAGFTGGVVDFPNSAKAKFYLCFSGPSTSLP      |
| P45879 | IYQKVNKKLETAVNLAWTAGNSNTRFGIAAKYQIDPDACFS   |
| Q4JM65 | NQTWNNPTWSNQSWNSQSWNSHWSNSQAWCPQAWNNQPWNN   |
| P24855 | LVQEVDRSHLTAVGKLLDNLNQDAPDTYHYVSEPLGRNSY    |
| P97361 | PLPLGQGPPLPLNQGPPLPLNQGLLPLAQLPLAVSPALP     |

|        |                                             |
|--------|---------------------------------------------|
| P05305 | CSSLMDKECVYFCHLDIIWVNTPEHVVPYGLGSPRSKRALE   |
| Q9P013 | RNRDRFRELEERERAAAAREKNRDRPTREHTTSSSVSKKPRL  |
| O88513 | DLAEVAEHVQYMAEVIERLSNEPLDNFESPDSQEFDSEEEA   |
| Q4VC05 | DTSLR IYKWVPVTEPKVDDKNKKNKKGKDEKCGSEVTTPEN  |
| Q8ND94 | GLEGADIPAFGPCSRLAVPPNPRTLHVHAAVGVGTALALLSC  |
| Q9QZ06 | VAPQPRCNEEDLKAIQDMFPNMDREVIRSVLEAQRGNKDAA   |
| Q8K1A0 | NRMSKLFDTVIMNPPFGTKNNKGTDMAFKLTALGMARTAVY   |
| P02747 | KFTCKVPGLYYFVYHASHTANLCVLLYRSGVKVVTFCGHTS   |
| P62820 | QESFNNVKQWLQEI DRYASENVNKL LVGNKCDLTTKKVVDY |
| Q9QZ26 | GYGYPYQQYQDYGDGWWNLNRQGFYSQCPCPHGQVVAVRSI   |
| Q16635 | ASSVVMGLVGTYSFCFWTKYMNHLTVHNREVLIELIEKRGPA  |
| Q7RTU3 | DLQQLRKINGRERKRMHDLNLAMDGLREVMPIYAHGSPVRK   |
| Q1LZC5 | ADPNQRDGLGNTPLHLAACTNHAPVITTLRGGARVDALDR    |
| Q3UA16 | ILEYKNQLCKQNKLIQEKKENVLKMAIEVKGKEQESEELTA   |
| P52803 | SQDPGSKAVADRYAVYWNSSNPRFQRGDYHIDVCINDYLDV   |
| Q9BVC5 | LSNSSSSVSPLILSSNLPVNNKTEHNNNDAKQNHDLTHRKS   |
| P25325 | AFGHHAVSLLDGGLRHWRQNLPLSSGKSQPAPAEFRAQLD    |
| Q3UPL6 | FEWGGACFIISGSLSVAERNHTSCLLKSSLTGNTILSAMAA   |
| Q9D7S0 | LNCTQCYTYNSTCDGQATECNEQSFSCVESSINSTLGGFLH   |
| Q15363 | TAVKHEQEYMEVRERIHRAINDNNTNSRVVLSFFEALVVA    |
| Q60651 | HHNNCSIMQSDINLKDELLKNKSI ECNLLES LNRDQNILCD |
| Q16611 | NRRYDSEFQTMQLQHLQPTAENAYEYFTKIATSLFESGINWG  |
| Q9JJE4 | GGSPVYTRLLALDMCGVCLVNTLGALPIIHCTLACRPWLRP   |
| P09067 | SYFVNSFSGRYPNGPDYQLLNYGSGSSLSGSRDPAAMHTG    |
| P56880 | SGVLTATLLPNWKNVVDVDSNIITAIIVQLHGLWMDCTWYST  |
| O95567 | INVRDRPSIPTYGLRQSI LLNTRLQDCYVDSPALTNIMMAR  |
| A1E959 | SAPLIPQRLMSASNSNELLLNLNNGQLLPLQLQGPLNSWIP   |
| Q9NQY0 | TDADLAMSKSAVKISLDLLSNPLCEQDQDLLNMVTALDTAM   |
| P41976 | NAQIMQLHHSKHHAAVNNLNVAEEKYREALEKGDVTAQIA    |
| P10746 | GLIFTS PRAVEAAELCLEQNNKTEVWERSLKEKWNKSVYV   |
| P35242 | LQGSMLSVGDKVFNSTNGQSVNFDTIREMCTRAGGHIAAPRN  |
| Q99JZ0 | DNMVVTPSPGPGQVAVPVSGNNGILRAEIKPGVREIHLCKD   |
| Q1RML1 | GYFLTKIFHPNVGANGEICVNVLKRDWTAELGIRHVLLTIK   |
| A0JN87 | GLTEAIVVNPFEVVKVGLQANRNRFTQFPSTMSYARHIKK    |
| P08861 | INSGDLFVHPLWNRSCVACGNLIALIKLSRSAQLGDAVQLA   |
| Q58D45 | VCPHCQQAITTKISYEIGLMNFVLGFFCCFMGCDLGCCLIP   |
| Q4JM65 | NLPMWGNQTNWNPWNSQSWNSQSWNSHNSQAWCPQAWN      |
| Q96A37 | QMANCPKFVVPVPTSQPIPSNIPNRSTFACPYCGARNLDQQ   |
| P29972 | TTLFVFISIGSALGFYKYPVGNQTAVDQNVKVSFLAFGLSIA  |
| Q9CPY6 | AFYQYAKSFNSDDFDYEEELKNGDYVFMWKEQFLVPDHTIK   |
| P56966 | AIWSRPESTQVQNILRQR TENIDIKKYCVHYLENVGSFEYT  |

|        |                                             |
|--------|---------------------------------------------|
| Q92914 | PVGLRVVTIQSAKLGHYMAMNAEGLLYSSPHFTAECRFKEC   |
| Q04743 | RIRTAFSPSQLLRLEHAFEKKNHYVVGAEKQLAHSLSLTET   |
| P10833 | GAMREQYMRAGNGFLLVFAINDRQSFNEVGKLFQTILRVKD   |
| Q96LL9 | TQAQIKAAAYRQCFLYHPDRNSGSAEAAERFTRISQAYVVL   |
| Q3TZ65 | EVTGPGGAYSPEKAPPVRQRNAPFTLGSRLRQKPPDTSVP    |
| Q0P5C7 | QLCQSIISLELLELHIYVVGIESNHLPRILQLTERIIVLFMVI |
| Q15560 | SAQIEECIFRDVGNTDMKYKNRVRSRISNLKDAKNPDLRRN   |
| P55064 | AGAGILYGVAPLNARGNLAVNALNNNTTQGQAMVVELILTF   |
| Q5KR47 | RAELAESKCSLEEEELKNVTNNLKSLEAQAEKYSQKEDKYE   |
| A6QPN6 | EQKIAFLTIVCLEEMDDMEQNLKPCQLIYAPKVSADSIMEC   |
| Q8BPB0 | AHIYHQHFDPIQLQEEAHLNTSFKHFIFFVQEFNLIDRRE    |
| Q96HS1 | WKPEAVQYYEDGARIEAAFRNYIHRADARQEEDSYEIFICH   |
| Q9ESJ7 | VCRRLDYITQSLQQGFQAENVTVTKNIRRVENAYHMEAEV    |
| A2VDP0 | EFLLLTLEQKNITVENDMRVNKDSLTDLYVQHAIPLPQRDL   |
| P39905 | IKRLKRSPDKQMAVLP RRERNRQAAAANPENSRRGKRRGQR  |
| Q6P1S2 | KKESYIEKLRKTYEIKWKNMNNCSLILKFRELISRINFRRK   |
| Q3TBL6 | GEQSEGEPTAAGPHVFSSKNLALQAQKKILSKIASKTVAN    |
| Q62193 | NSQASAGRFSMSNPGMSESFNFGNNFMPANRLTVVQNQVL    |
| Q9BQI4 | YNLLPHGVNFQDAIFPDTQENRRMFSSLFQFSNCSQGGQLA   |
| P98066 | VFTDPKQIFKSPGFPNEYEDNQICYWHIRLKYGQRIHLSFL   |
| Q96PP4 | SFMLKVTQYDQDKTLLIMTNNPPPCSITQQDKESASKYFSK   |
| Q2KIV9 | KPGTPTGKGEKGLPGLVSHLNENGEKGDGPGMPGKVGPK     |
| P26373 | TIGISVDPRRRNKSTESLQANVQRLKEYRSKLIILFPRKPSA  |
| Q8K3J1 | GHLNGQSLHSSAVAATYKYVNKKEQESEVDMKSATDNAARI   |
| O55101 | LVSMLLALIVFSCIFGEGYTNIHSTSDQLYCVFNQNEDACRY  |
| Q2KJF9 | EGLPNSQRAVKALGDQILFVNRPDKKKILFFNDKSCQFSVD   |
| Q9CPR7 | QVDDNQFCKVQERLAQLELENKELRELLSISSESLQVGKES   |
| Q9CQ83 | EESYGKYLRRESHQIGDAYSNSDKSLTELESKFKQGQEQDS   |
| Q0VD59 | GSSVASAPVSSFPRTSVTPSNQDICRICHCEGDDESPLITP   |
| O70552 | ASFGRWENWELAQHVSQAVNRATGDCSSGTSDEESCSRE     |
| A1L3X0 | TWWFGVKFAAGGLGTFHALLNTAVHVVMYSYGLSALGPAY    |
| Q8K4T5 | NAFLSEFTYKTIISILDVPETNILSYFPECFEFIEQAKLKD   |
| P57746 | STTVIQNVNKAQVKIRAKKDNVAGVTLVPFEHYHEGTDSE    |
| O00625 | YLLEGGSMAHEDFCGHTGKMNPGDLQWMTAGRGILHAEMPC   |
| P12004 | MSKILKAGNEDIITLRAEDNADTLALVFEAPNQEKVSDYE    |
| Q3T0L1 | STALKKHLEKVDIKTSVLMNMQILNLNKLIMKSQQETWD     |
| Q9Y2D1 | QRKRAEGEALGECQGLEARNRELKERAESVEREIQYVKDL    |
| Q6BBL6 | GVVFLLAGLLVMVPVSWTANNVIRDFYNPLVASGQKREMGA   |
| Q3ZCD8 | ASLRRQIIKLNRRQLLEENKERAKREMMYSITVAFWLL      |
| Q9BY27 | VADQQSTLEKAGVAGFYVTNFPQELMLQMNLELIRKLQQR    |
| Q8N7N1 | LAACREHKRAPEVYVAFTVRNPETCQLFTTELGRDGIRWEA   |

|        |                                              |
|--------|----------------------------------------------|
| Q5HYI8 | DVGGSVGSASSVKSTRAVFYNSVNGIIFVHDLTNKKSQNL     |
| Q9CQI7 | MEQAAAAANKKPGQGT PNAANTQGTAAPNPQVPDYPPNYIL   |
| P42574 | RSSFVCVLLSHGEEGIIFGTNGPVDLKKITNFFRGDRCSRSL   |
| Q14002 | YRVCIPWQGLLLTASLLTFWNLPSAQTNI DVVFPNVAEGK    |
| P20336 | EESFNAVQDWSTQIKTYSWDNAQVLLVGNKCDMEDEVVSS     |
| Q5E9C4 | LNSKYRDTLPQLPKAFEQYLNLEDSRLLSHLKACCAVSTLP    |
| Q96DN0 | AAKLFQGGKILFILVDSGMKENGKVISFFKLKESQLPALAIY   |
| Q9D387 | VENLSGLSTNPEKDI FVVRENGTTCCLMAEFAAKFIVPYDVW  |
| O14668 | IFGLFILLVIFLIWRCF LRNKTRRQTVEGHI PFPQHLNI    |
| Q96PU9 | YSFRGAPMLLAENCSPGPRYNVNPKILRTGKDLGPAYSILG    |
| Q9UKW6 | SLQSSHLWEFVRDLLLLSPEENCGILEWEDREQGI FRVVKSE  |
| A1XBS5 | IFAAAYVRKTARLRDKADLLVNEINAYAATETPHLKLGLMNF   |
| P61588 | PETLDSVLKWKGETIQEFCPNTKMLLVGCKSDLRTDVS TLV   |
| Q60809 | VWACNLDEEMKKIRQVIRKYNVAMDTEFFPGVVARPIGEFR    |
| Q60932 | RVTQSNFAVGYKTDEFQLHTNVNDGTEFFGGS IYQVKNKLE   |
| A7Z070 | RNKTRRQTVTESHIPFPQHLNIITPPPPDEVFDNSGLSPG     |
| Q6PID6 | LEGCAEKSQQLKDEGASLAENKRYREAIQKWDEALQLTPND    |
| Q2HJC9 | LFYYWNVDTDLVSWLSPHPNSVVTKS AKKLRSSNADAEK     |
| Q9D305 | KLKSRNLLKTNNSFPPTGPCNLKNGSQV VLEHSYAFRNP     |
| P59279 | TAKEIYRKIQQLFDVHNEANGIKIGPQQSITSSVGP CSPQ    |
| Q3ZBW4 | AVVISCARDGVKFSASGELGNGNIKLSQTSNVDKEEEAVAI    |
| Q8K305 | LALRDAQWTFESAVQENVSFNGQAWEEAKEHGLMDSDIKVL    |
| Q9CXV9 | LQCDCTEKLQSRFDLRSQLNDISSFKNIYRYAFDFARDKD     |
| Q8N1Q1 | LSIKYDPSSAKIISNSGHSFNVD FDDTENKSVLRGGPLTGS   |
| P79124 | CPNNPESTSLTVLHRRPGLLNDVVD FGVNLRQLVSSVVQH    |
| P16114 | EKIIESIYISSVSFFSDKVRN LIEKDLSRKWTLGIIADAFN   |
| Q3UK78 | SDPQIAICLDCLRNNQSGDNVVKGLMKKFI RCSTRVTVGT    |
| O60725 | WYMCSLSLFHYSEYLVTA VNNPKLSLDSFLNHSLEYTVA     |
| Q9DD18 | KGNKPDFHLAMPTEQAESFYNSFLEQLRKSYP E LIRDGKF   |
| Q2HJF2 | QLNRECLLHLFSFLDKDSRKNLARTCPQLQDVFEDPALWPL    |
| Q9H560 | ANLHAIDNFRRTALMLAVQHNS SIVSLLLQQNINIFSQDL    |
| P0CI32 | HAATGLIRQLAYELAPKVRVNGVGP CGMASDLRGPQALGQS   |
| O35739 | GDTWKDYCTLVTIAKSLLDL NKYRPIQTSPVCSDSLES PDE  |
| Q3SWZ3 | QQFVELINKCNLMQSEYREKNVER IRRQLKITNAGMVS DKE  |
| P14415 | HVQKLNKFLPEPYNDSIQAQKN DVCRPGRYYE QPDNGVLNYP |
| Q3MHR2 | YLEKLHYKHESWLLHRTLKTNF DYLQEVPI LTLDVNEDFKD  |
| P97436 | TPTEPESDAH FETYLLDCEHNP GD LASAPQVTKQPQKRSRA |
| Q969T7 | IRQMKVFHPNIHIVSNYMDFNEDGFLQGFKGQLIHTY NKNS   |
| Q8TCQ1 | NTRTPEISGDLADASQTSTLNEKSPGRSASRSSNIS KASSP   |
| Q9BTT0 | GGLEVLAEKCPNLTYLNL SGNKIKDLSTVEALQNLK NLKSL  |
| Q9BY14 | PMFVREACPHQLLTQPRKTENGATCLPI PVWGLQLLLPLLL   |

|        |                                              |
|--------|----------------------------------------------|
| Q91WG1 | FLYVRSWLPCEIFFAGGITMGNIGRQLAMYECKVIAEKSHQE   |
| P23888 | TPTGRHYVFKNLNIIFFPKGYNIALIQNGAGKSTLLRIIGG    |
| P29692 | KPATPAEDEDDEDDIDLFGSDNEEDKEAAQLREERLRQYAE    |
| P35232 | CRSRPRNVPVITGSKDLQNVNITLRLFRPVASQLPRIFTS     |
| P01131 | NEAIFSANRLTGSDISLMAENLLSPEDIVLFHNLTPRQVGN    |
| Q96BD8 | VINELLNKLELEIQYQEQTNNSLKELCESLEEDYKDIEHLK    |
| P01589 | MQPVDQASLPGHCREPPWENEATERIYHFVVGQMVYYQCV     |
| Q8R2N0 | EGISQVRFGNQNGKRRTWRPNPQQAFRGSVRKQGFAFRRK     |
| Q5EAA4 | ESLINDEDVFPTRVGVPPFKNFQQVCTKILTRLFRVHVHY     |
| Q9UBX3 | LLGSVSGLAGGFVGTTPADLVNVRMNDVKLPQGGRRNYAHA    |
| Q9QW08 | SLACLAVEYPMVKFCKIKASNTGAGDRFSTDVLPDLLVYKG    |
| Q9Z1P5 | IDKIFQEEENATTTTRISTTMENETSFRNVFTSAGDSSRNPS   |
| O95661 | TLLHKWASGNFRHEYLPTIENTYCQLLGC SHGVL SLHTDS   |
| Q8K2W6 | KRTIVRQKQVFRDEDESTGNEDEDIMVSDDDSDWLVTCFC     |
| Q8BSU7 | RKFEPGTQRFELHKRAQASLNAGLDRLAVQLPPGEDLNDW     |
| Q9NVV0 | GWIVMIAIGWARGAGGTIITNFERLVKGDWKEGDEWLKMS     |
| Q8R107 | QSVLRSSWDQVFAAFWQRYPNPYSKHVLTE DIVHREVPDQ    |
| P33781 | KDITARSVKPYDFFI V PVSGNVT PGAPVTRDTSANINSVNA |
| Q5TFG8 | QCMLAIKEGRPLPPPPPSLNPDIQRPYCMRRFNESAAR       |
| Q06323 | DEKKKGEDEDKGPVPCGVNCEKIVVLLQRLKPEIKDVIEQ     |
| O43657 | FRHEIKNSEFKNNYEKALKQYNSTGDYRSHAVDKIQNTLHCC   |
| Q9H063 | LDSDFPGEDGSLWSFNFFYNKRLKRIVFFSCRISISGTYT     |
| O09044 | TMLDEQGEQLNRIEEMDQINKDMREAECTLTENKCCGLC      |
| Q91WB4 | MNHINKCVTDLLSKSGKTPSNEHAAVVWVPDSEATVCMRCQK   |
| Q9Z261 | ACSWIGHQIVTDFYNPLTPMNVKYEFGPAIFIGWAGSALVL    |
| O43759 | VVSWLFSIVVFGSIVNEGYLNSASEGEEFCIYNRNPNACSY    |
| P56371 | AAGALLVYDITSRETYNALTNWLTDARMLASQNIIVLILCGN   |
| Q3TP92 | TVIQYQTVRYDILPLSPLSRNRLAQVKRKILVLDLDETLIH    |
| Q3ZBW7 | RIGTNLPLKPCPRASFETLPNISDLCLRDVPPVPTLADIAW    |
| P08962 | FKCCGAANYTDWEKIPSMKSNRVPDSCCINVTGCGINFNE     |
| Q8CBG9 | LVAVVVS LALTATLLYALLRNQQNIHPENQELVRVLRQF     |
| Q5FWC3 | IVAASLTIVELSHFRSVSYRNYGQAKLGREVSRVLLCSYPL    |
| P18468 | LDEKRAAVDTYCRHNYEIFDNFLVPRRVEPTVTVYPTKTQP    |
| Q3T165 | IGKFG LALAVAGGVVNSALYNVDAGHRAVIFDRFRGVQDIV   |
| Q7RTY3 | HLQTPVTFSEYVQPICLPEPNFNKVGTCQWVTGWSQVKQR     |
| Q2TBT5 | FAKMEEDGDFVGWALDVLSPNLISTSM LGRVKYNLNLASHD   |
| O75841 | FTPNLFLKQMLERYQNNSPNNDDQWKNNGVTKTWDRLMLQ     |
| P18468 | RRVEPTVTVYPTKTQPLEHHNLLVCSVSDFYPGNIEVRWFR    |
| Q96PG2 | GLPSWQVLSPVQFWQTSAPQNTTQPKLLAPHQHEKSQKSS     |
| P41976 | GWGWLGFNKEQGRQLIAACSNQDPLQGTGLIPLLGIDVWE     |
| P35278 | AKTAMNVNEIFMAIAKKLPKNEPQNAAGAPGRTRGVDLQES    |

|        |                                            |
|--------|--------------------------------------------|
| Q9NXJ5 | LYQSHGRSAFVHVPPGLGKPYNADQLGRALRAIEEMLDLLE  |
| O43482 | QNVPLSEKIAELKEKIVLTHNRLKSLMKILSEVTPDQSKPE  |
| P61006 | RGEKLALDYGIKFMETSAKANINVENAFFTLARDIKAKMDK  |
| P70396 | HHPHAHPPTSNOQSPASSYLENSASWYPSAASSINSHLPPPG |
| Q9BVX2 | RDSITCLTCQGTGYIPTEQVNELVALIPHSQRLRPQRTKQ   |
| P11456 | VVGAKGMEQFPHLAFWQDLGNLVADGCDVFCRSKPRNVPA   |
| Q3UZ26 | STYPKSGTTWVSEILDLIYNNNGDAEKCKRDAIYKRVPFMEL |
| Q92637 | VYNVLYYRNGKAFKFFHWNNSLTIKNTNISHNGTYHCSGMG  |
| Q8BJ83 | CPRQRYFANCTVRDHIHCLGNRTFPKLLYCNWTGGYKWSTA  |
| Q32LN3 | FPETKFKAIANSCEIHYHDNCLPTIFVYKNGQIEGKFIGI   |
| Q3T0S3 | KDFTQVWNSTMAGLKCCGFTNYTDFEGSPYVRKNGTFPPYC  |
| A5D7U1 | AEYYLKGNFSTLFKAKWMSPNSTDIITVKINIYTVNSLRNA  |
| Q0VC80 | LLPGPVTLVMERSEELNKDLNPFPTPLVGIRIPDHAFMQDLA |
| Q9DCH6 | TTQQPSEEQSKSLEKPKQKKNRCFCMRKVVGLTGFECCRCGN |
| A6NDY0 | TQAWLQTVSSDPEAQGWGAWNETKEILGPEGGEGKEEKEE   |
| O35723 | GFGGFASLDTGFTSFGSPGNSGLSSFSMSCGGGAAGNYKS   |
| Q96KN4 | I IHLHQGEIRQDSLYEAGAANVGRVNSWYRVRPLVAELVV  |
| P60191 | QVLLFPESFQGVKLVQVIVWGNVGRMERKQFMGVARVLEEL  |
| Q9MYP6 | LLGTYTLTKLALPHLRKSRGNVINISSLVGAIGQSQAVPYV  |
| P26884 | TLDEGPPKYTKSVLKKGDKTNFPKKGDVVHCWYTGTLQDGT  |
| Q9CY57 | VVLKSTTKMSLNERFTNMLKNKQMPVNIIRASMQQQQLAS   |
| Q9DAU1 | TETICKRLLDYSLHKERTGSNRFAGMSETFETLHNLVHKG   |
| P13972 | QVATSFLEELDAMSLPSSMNKIQSVAIQDKLWLQVFIPLI   |
| Q9UL40 | KIVLNSIEQYQAHVSGFKHKNQSPKTVASSLQIIPMQRQPI  |
| Q9CQN4 | IILYSHVVKPVPAPSSNSTLNQARNNGRHSSTGLDRNSRV   |
| Q5SSH8 | TGPPSDQQDNPRHSNHGDLNPNLEEYTGCPPLATTCSEFPL  |
| Q969G5 | TTSNTLAQLLAKAERVSSHANAAQERAVRRAAQVQRLEANH  |
| P51749 | ASSKTTSVLQWAPKGYTLSNNLVLENGKQLAVKRQGFY     |
| Q9CQJ2 | GQGCTAYDVAVNSNFYLRMNSDFLRELVVTTIAREGLEDKY  |
| Q6PDY0 | REEAARLAALVQRGRIMQEVNRQLQGHLEIRELKQLNRRL   |
| P63011 | EESFNAVQDQWSTQIKTYSWDNAQVLLVGNKCDMEDERVSS  |
| Q9BQ83 | YLLYCLNPRYRGRVYVGFVTNTARRVQQHNGRKKGGAWRT   |
| Q60653 | FLLLITVAVLAVKIFQYQGHQEIHETLNYHHNCSNMQSDF   |
| O89051 | NKKLTAYLDLNLKCYVIFLNTSIVMPPKNLLELLINIKAG   |
| Q9D780 | SIERAGMDVTYIWLSSQDSTNTSHEGSVLSTSWRPGDKAPS  |
| P70280 | CGGNFLEVTEQILAKIPSENNKLYSHGNLYLFHYICQDRIV  |
| Q46668 | GDSNSFGELRNWQIMPGRPNTIQFRNVVDVGTCTMSTFPQFK |
| Q0VD86 | SGAASEPVVLGEEGCGFPSTNEYPDLEERATYPQEEEDRFL  |
| Q86WA6 | VLLLPGLGSGETDFGPQLKNLNKLFVVAWDPRGYGHSR     |
| Q3T0D3 | CVYNscyEENIWKLCEYIKNHDQYPLEECYAVFISNERKM   |
| Q9D061 | SPSQAMQEYIAAVKKLDPGWNPQVSEKKKKEGSSGFGGPVV  |

|        |                                             |
|--------|---------------------------------------------|
| Q9NPC6 | LYPKLFKPEGKAEPLDYRSFN RVATPFGGFEKASRMVKFKV  |
| P61981 | THPIRLGLALNYSVFYIEIQNAPEQACHLAKTAFDDATAEL   |
| Q9H560 | RRQQIVEFLLKNQANLHAIDNFRRTALMLAVQHNSSSIVSL   |
| P09488 | YEEKYTMGDAPDYDRSQWLNEKFKLGLDFPNLPYLIDGAH    |
| Q91VX5 | LVTGKIVDHGNGTFSVHFRHNATGQGNISISLVPPSKAVEF   |
| Q8QZV2 | PTRSQTNCCLPEGTMNNVYVNMPTNFSVLNCQATQIVPHQ    |
| O70552 | HPDCPSKGAFCIRINNNENKDPVLERACAESNVNFFHLG     |
| Q922H7 | QPSSTPEKRRTSLIPRPKSPNMQLKRRFKQALSAKVRTVT    |
| A5PLL7 | RHDFIETNGDNCLVTLPLLN MAYKFRTHSPEALEQLYPWE   |
| P62917 | AYHKYKAKRNCWPRVRGVAMNPVEHPFGGGNHQHIGKPSTI   |
| P05529 | PLLEINLSFSYKVNLPVFNLSLKIEQGELIGLLGENPA      |
| O35425 | CTVLLRLGDELEQIRPSVYRNVARQLHIPLQSEPVVTD AFL  |
| Q9JKD3 | RSGGSFSKAQE EWTGAWKNPHVQQAQAAMGAAQGAMN      |
| Q8BR90 | LVDGINYLLQMLNYRCPVQLNEGVSFQDLDTAKLLSTGVFS   |
| Q9GZV9 | GFVVTIGVMSRRYLCMDFRGNIFGSHYFDPENCRFQHQTLE   |
| Q04741 | RIRTAFSPSQLRLLEAF EKHYVGAERKQLAGSLSLSET     |
| O88552 | FSLVAGVILCFSCSPQGNRTNYDGYQAQPLATRSSPRSAQ    |
| Q6PKH6 | ALLGLNNTLAIELAPRNIRVNCLHLDLSRLASAGCSGWTRK   |
| Q96JQ5 | LMSLSMGITMCMASNTYGSNPISVYIGYTIWGSVMFIISG    |
| Q17QI5 | LDKVMETQAQVDELKGMVRNIDLVAQRGERLELLIDKTEN    |
| O14494 | PDWSKINCS DGYIEYYICRGAERVKERLSFYSGHSSFSM    |
| Q13277 | LHDMFMDIAMLVENQGEMLDNIELNMVHTVDHVEKARDETK   |
| Q8BW11 | YLPCTGVLIHPLWVITAAHCNLPNLQVILGITNPADPMERD   |
| Q3ZBK2 | YGPQRRKMMFMGFVRLGVWQNF FRAWNGGFSGNLDGEGFIL  |
| Q9DB15 | GINLVQAKKLVESLPQETKANVAKAEAEKIKAALEAVGGTV   |
| Q5T0T0 | PETSKNIFEKSPLTEPNFENKHG YGICHSDTNSCCTEPE    |
| O94778 | HGLALGLVIATLGNISGGHFNPAVSLAAMLIGLNLVMLLP    |
| P57052 | SDLYQMTAPLPNSASVSSSLNHVPDLEAGPSSYKWHQQPS    |
| Q9CRA4 | IRLLETIDVHSGYDIPLNPLNLVPPYTGARHHDFHMHNF IG  |
| P62080 | QLYFFINNNIRAYRDDIDLQNLIDFTQEYWQCCGAFGADDW   |
| Q9Y5U5 | PWTDCTQFGFLTVPGNKTHNAVCPGSPPAEPLGWLTVVL     |
| Q9CWU6 | DEGILSDDHGLAAALWRTFFNQKCEDPRQLELLVEYVRKQM   |
| Q9CQ58 | MQTAGTLRRTLADQFYVELYHNQFSSGQFLIFNSNLIRRDET  |
| Q99JT6 | MMMKNNAQDLLLLYKVNKYINLV MYFLRFLAPQAYLTKFFL  |
| Q6Q7D1 | AAPAGTRVRSSQSTRWLMQMNFLSYVQLTSSALPSLTD SKG  |
| Q5E9J3 | VQDTPGIQVHENGSLCTEQLNRCIRWADAVVIVFSITDYKS   |
| Q3SZI4 | MATCMKAVTEQGAELSNEERNLLSVAYKNVVGRRSAWRVI    |
| P14191 | GSITADDYRQKWEWKVGTGLNGFGVNLNLTNGGKLTITV     |
| P23709 | KTYTDELTFIESSVPVYKAA NWYEREIWD MFVGFVANHPDL |
| Q5T0T0 | KVYVQLWKRKAYNRVIYVQNCPE TSKNIFEKSPLTEPNF    |
| Q8NEB5 | DSRQACLAASLALALNGVFTNTIKLIVGRPRPDFFYRCFPD   |



|        |                                            |
|--------|--------------------------------------------|
| Q9HBM6 | DQSFTSPPPRDFLLDIARQKNQTPLEPLIKPYAGPRLPPDRY |
| Q6UX82 | FLSGENKTLGGVIFRKFECANVNSLTPTSAPTSSHNVGSKA  |
| A6QL48 | LTRSDECAITGFLRDKLQYRNRLQYMKHYFPINRVSVFYE   |
| Q13145 | KKGQVAKLDLECMVPVSGHENCLTCDKMRQADLNDKILS    |
| Q9CQA5 | GRLPDVLAQPYPWQSNDSVNMLPPNHSSDFLEPPGHNKE    |
| A6NNP5 | NDELEKQIVYLKEKVEKIHGNSDRLSSIRVYERPVESLN    |
| P13378 | VQYPDCKSSSGNIGEDPDHLNQSSSPSQMFPWMPQAAPGR   |
| Q6UJB9 | PALLRRLYLWVEHRTTTSWNLAYLVTTTCLASHLLQAAF    |
| Q3MHM8 | RKDPVLQPDGSGSPVLPDKRNGIFSADAGGKALARRWPVQV  |
| Q969T9 | VPSTPAEAKAAEAAAAYYNPGNPHNVYMPQSPPPPPY      |
| Q99P51 | EKVHKYNSAVTDKLMKTLNSNGIYTGFIKVQMELCCKPAQPS |
| Q6ZWI9 | KVPALEEWQVSVLTLMTKQHNRSLEQSLHVREELRHFREDV  |
| Q9CQX3 | FRHGLLSGGILSFLEHIPLLNYVRPTGSNAGGLVGVLGKVI  |
| Q969E2 | QTEWNTGTWRNPPSREAAQYNNFSGNSLPEYPTVPSYPGSGQ |
| Q15475 | KNRRQRDRAAEAKERENTENNSSSNKQNLSPLEGGKFLM    |
| Q8BX10 | RATEPPAWTGARAGRGVWDTNWDREPLSLINLKKRNVEG    |
| P0C7W6 | SKVQQFFEKSFFLQLLKAHENALEKQYSEITNHRNMLLQTF  |
| Q32L08 | LLHLCNCRKLLKLNKSSKENRISITSGKIKAVASSCSYLH   |
| P00642 | GKRGDQDLMAAGNAIERSHKNISEIANFMLSESHFPYVFLFL |
| Q96PB8 | VTMFGWFTMVISYVVYYVRQNQEDARRHLEYLKSLSRQKK   |
| Q16878 | VLRENQAYINDSIGLHRVENISHTEPAVSLHLYSPPFDTC   |
| Q96CE8 | VTTVLLVLENNNNYKCCQSENCSSKKYVTLLSIIFSSLGIAF |
| Q9QZ28 | ERLGRFLWSLVPAPAACEALNKNESVLRARAIVAFHGGNYR  |
| Q0VD50 | AKVLRHHQEKLEASICDPQQNSPVLEKPKRKRKWAQKQDI   |
| Q5SZJ8 | HSLTGAKSSTSRDKAVKPMNQNEVQEIIIGVTKQLFPNTDD  |
| Q2TA24 | YITGSSIIIGGVKAPRIKTKNLVSIIFCEAVAIYGIIMAIIV |
| Q9ER00 | ELIKERETAIRQLEADILDVNQIFKDLAMMIHDQGDIDISI  |
| P48307 | LLLFLTEAALGDAAQEPTGNNAEICLLPLDYGPCRALLLRY  |
| Q0VCT4 | PSRNHTLPAVEVQSAIRMNRNRINNAFFLNDQTFLEFLRIPS |
| Q9DAS2 | ASSFGSSYGNTTFKYFQDLRNTGLEKSYALLSGGCFPTIFS  |
| Q2HJH2 | NVNKLLVGNKSDLTTKKVVDNTTAKEFADSLGIPFLETSK   |
| Q75508 | VVGFTVSFVGWIGVIVTTSTNDWVVTTCGYTIPTCRKLDELG |
| Q9D753 | LKENCRRPDGRELGEFRATTVNIGSISTADGSALVKLGNTTV |
| Q924T2 | VHLGHKAGCRHRFMEPYIFGNRLGQDIIDLQDTALNLQAL   |
| Q60660 | TLLKTNDEDELKFLKSQLQRNTYWISLTHHKSKEESQQIGD  |
| Q3T0X7 | YALVNLATTSVSKMASDFAENELDFRKALELIIDSDTGFA   |
| Q9WTJ2 | QSRDQGFLRTKMKVTLGDSPNGDLFTCHICQKSFTHQRMLN  |
| Q91VU0 | NVLMGKVVNNVGRGINIALVNGKTGEVIDTKFFDMWGGDVA  |
| Q9BUA6 | RDGFIDKEDLRDTFAALGRINVKNEELEAMVKEAPGPINFT  |
| Q3KNM2 | ILGKMIRWEDYVLRWRKYSNKLQILNSIFPGIGCPVPRIP   |
| Q077R2 | KEDYALWLNILSKGIKARNTNLVDYTYRVHAGSVSANKFKE  |

|        |                                            |
|--------|--------------------------------------------|
| Q5M956 | LSGDKSLIEEVFPEIGDVMCNSVAGWNHDSHTVIRFPPLNG  |
| Q96MV1 | DKFFIMHHCASLYAYLVKNGVLAYIGNFRLLAELSSPFV    |
| Q9JKT3 | FFLLCWKFLDANSLWLVTLNLSLYCVKITNFPQHPVFLLLKR |
| Q9D9S3 | ITLQIEEPKVTIDLQVTPHNYPYVALQLFGRSPELDRQQQ   |
| Q6ZMS7 | LEWGKLEDWQKELYKHVMRGNJETLVSLDYAISKPDILTRI  |
| Q9CWG1 | WDPKLAQIAKAWTKSCEFKNPQLHSRIHPNFTALGENIWL   |
| Q35660 | VYDVLQHRMFEPTCLDAFPNLKDFMARFEGLRKISAYMKT   |
| P13634 | QKVLDALNSVKTGKRAPFTNFDPSLLPSSLDYWTYFGSL    |
| Q9BSU3 | ENQETQGSTLSDSEACQQKNPATEESGSDSKEPKESVEST   |
| Q8K0E1 | LSGEKALIEEVFPETGDVMCNSVAGWNQDPTHVIRFPPLNG  |
| P43320 | IIFEQENFQGHSHENGLPCPNLKETGVEKAGSVLVQAGPWV  |
| P58753 | LGMADWFRQTLKPKKRPNSPESTSSDASQPTSQDSPLP     |
| O08859 | LCVLLWEEAHGWGFKNGIFHNSIWLEQAAGVYHREARAGRY  |
| Q2KJD3 | ENILSGNPLLNLTGPSQPANFKVRRDDDDVVFKNCAKGV    |
| Q8WUU8 | PQDNSAFVVDEGCLSFTDGGNHRPNPDVDQLEETQLEEEAC  |
| Q8TAL6 | SFFCHLCQGYFDGPLYPEMSNGTLHHYFVPGDYEENDDPE   |
| Q8TBG9 | KVATDPKEVLLMSACKQPSNKCMAIHSPPVMSLNTSVVFG   |
| P15483 | PIKLIFAALSFPSCNIYANNITTKQFEAILGATRVIYHLD   |
| Q0VCH8 | QEKLEAQPPTPGQLRYVFIHNAIPFIGFGLDNAIMIVAGT   |
| P97299 | DLKKSVLWLKDSLQCTCEEMNDINAPYLVMGQKQGGELVIT  |
| Q8R1M8 | WDVSLWDHVVPLEKVSDCNNGNLINWQALNYEDNGYVVIK   |
| Q0P5A4 | QYNFDHPDAFDNDLMHRTLKNIIVEGKTVEVPTYDFVTHSRL |
| Q9CQ61 | QLFFINHVILTDTFIGYLVGNTLWLIYVYIYVTFGLGSA    |
| Q2TBH7 | SRFAQENELMFLETSALTGENVEEAFVQCARKILNKIESGE  |
| Q8C1T8 | SDHWIGLHRASTQHPWIWTDNTEYSNLVLRGGGECGF LSD  |
| Q96HJ5 | CSSGTLVVAGIKPRTWTIQNSFGMNIASATIALVGTAFLS   |
| Q5E9D3 | TFEADENENITVVKGIRLSENVIDRMKETSPPSGPKSQRYSG |
| Q96E22 | ALLCLHRTLTSWLRVRFGTWNWIWRRCCRAASAVALPLGF   |
| O14966 | YRDASACVIMFDVTNATTFSNSQRWKQDLDSKLTLPNGEPV  |
| Q8BLR7 | TEEQRVELSLWDTSGSPYDNRPLCYSDSDAVLLCFDISR    |
| Q9BSU3 | ELRRQMDLKKGGYVVLGSRENQETQGSTLSDSEACQQKNP   |
| Q86VX2 | LTEPKEVERFLAQLSEFATTNQISLGSLSRIVKSLLLVFNQ  |
| Q3SZY9 | DIRDNLLGISWVDSWIPILNSGSVLDYFSESRNPFYDRTC   |
| Q9P0G3 | RWEATQQVLRVVRQVTHPNYNSRTHDNDMLLQLQQPARIG   |
| Q9Y294 | RENPPVKPDFSKLQRNILASNPRVTRFHINWEDNTEKLEDA  |
| Q8VE10 | AANRLGDPLEAFPVFKKYDRNGLNVSIECKRVSGLEPATVD  |
| Q9UGN4 | HSELSQNPQAATQSELHYANLELLMWPLQEKPPAPPREVEV  |
| Q8BGB7 | VEASAAEEADVHVAVVVRPAGNAGLTDDEKTYYNLITSFSEL |
| P28063 | MGSMICGWDKKGPLYVDDNCTRLSGQMFTSGSGNTYAYG    |
| P62080 | VVGGVMFILGFAGCIGALRENTFLKFFSVFLGIIFLELT    |
| H3BQB6 | KTKEEIRKRLRSRLLPSANHSDSAELDGAEVAFAGLQR     |

|        |                                            |
|--------|--------------------------------------------|
| Q3MHR7 | YITFVLFPRHTNASARDNTINLIHTFRDYLYHYHIKCSKAYI |
| Q9BQ75 | VHLGVGTGRIKELVKQGGNLNSPLKFLVFDWNWRDQKLR    |
| Q9DCT2 | HIAANWYEREVWDMFGVFFFNHPDLRRLITDYGFEGHPFRK  |
| Q6ICC9 | TGEAEKWAI PHMQPDSPLRNNYQGFLAELRRTYKSPLRHAR |
| P51674 | LAGAGAAVIAMVHYLMVLSANWAYVKDACRMQKYEDIKSKE  |
| Q969X5 | PTVYEDKSGKQRYSYQYTVANKEYVAYSHTGRIIPAIWFRY  |
| Q9CPR8 | QGTPI SGLLMIVLGLIFMKGNTITETEVDWDFLRLGVYPTK |
| Q9BYJ0 | EYRQPSMCQAFADPKPYWNQALQELRRLHHACQGAPVLR    |
| Q9D8X5 | DDAKYCGRLYGLGTGVAQKQNEVDCAQEKMSILAMINMQ    |
| Q9JKF4 | LSDFQNGKQWIDDTFFSQNVRFWHPHEPNLPEERCVSIV    |
| Q8VHW4 | YISSINDEMLNRTKDAETYFNKYGWSFAFAAISFLLTESA   |
| Q32LJ6 | YNSVNGIILVHDLTNKSSQNLWRSLALNRDLVPTGVLV     |
| Q9D1J1 | NPDEGPKLDLGFKDGQTTKINIANMRKKEGAGTPRARPTS   |
| P0DMB1 | VEQGPSTGAKKPSISGAPHLNSYQSLELPQNQQDSGTEELM  |
| Q9CQ01 | QFWKHEWVKHGTCAAQVDALNSEKKYFGKSLDLYKQIDLNS  |
| Q2KI95 | NPISGLGGTKYISFEERQWHNDCFNCKCSLSLVGRGFLTE   |
| Q9D305 | HRFPLDPKRRKEWVRLVRRKNFVPGKHTFLCSKHFEASCFD  |
| P61296 | FAAAAAAAAAAASRCSHEENFYFHGWLIGHPEMSPPDYSM   |
| Q5TFG8 | QSKSPPVRKSNWRQHQHEDFINAIRSAKQCLAIKEGRPLPP  |
| Q8N4E7 | AAASSRDPTGPAAGPSRVRQNFHPDSEAINRQINLELYAS   |
| O95407 | RRDSPPTCGPCPPRHYTQFWNYLERCRYCNVLCGEREEEAR  |
| P68401 | LKNGELENIKPKVIVVWVGTNNHENTAEVAGGIEAIVQLI   |
| P17976 | ISLSDLRFFMPSLTAELRGNRSQWLYAVDVLIEQTQGEVCL  |
| P09629 | RGRQTYTRYQTLELEKEFHYNRYLTRRRRIEIAHTLCLTER  |
| P15946 | DDLQCVSIKLLPNEVCVKNHNQKVTDVMLCAGEMGGKDTC   |
| Q7Z7H5 | LFAGGKLRVHLDIQVGEHANNYPEIAAKDKLTELQLRARQL  |
| Q07021 | IFSIREVSFQSTGESEWKDTNYTLNTDSDLWALYDHLMDFL  |
| Q9ESK4 | SQELGDEKIQIVTQMELVENRARQMEHLSQCFQDPAESER   |
| Q61334 | SKENLKTTELKASDALLKAQNDVMTMKIQSERLSKEYDRLL  |
| Q9CR48 | YVRYKQVHALNPEENLI IKLNKAGLVGLSCLGLSLVANF   |
| P14206 | QMKEEDVLKFLAAGTHLGGTNLDFQMEQYIYKRKSDGIYII  |
| Q5E9L3 | EFSLADALPENS PAKTSAVSNTPGQPPQGWPGSNPWNPNPS |
| Q8CFP6 | TIGIDYGVTKVQVRDREIKVNI FDMAGHPFFFEVRNEFYKD |
| P57076 | QKQLMLYHRRQEELKRLEENDDAYLNSPWADNTALKRHF    |
| Q01105 | EIDRLNEQASEEILKVEQKYNKLRQFFQKRSELI AKIPNF  |
| P15319 | EGEFETVMLSPRSEQTVKSANYNTPYLSYINDYGGRPVLSF  |
| Q1LZ83 | SSRVIRVLGCNPGPMTLQGTNTYLVGTGPRRILIDTGEPSI  |
| P61019 | AFINTAKEIYEKIQEGVFDINNEANGIKIGPQHAATNATHA  |
| Q8N7P3 | SLSLLGWVLSCLTNYLPHWKNLNLNLNEMENWTMGLWQTCV  |
| P18021 | SALLHYVPDLRRKMLLATLWNTGARINEALALTRGDFSLTP  |
| Q99N84 | KVAGNPCPICRDHKLHVDFRNVKLEQFVCAHTGII FHAPY  |

|        |                                             |
|--------|---------------------------------------------|
| O43423 | GGLEVLAEKCPNLTHLYLSGNKIKDLSTIEPLKQLENLKSL   |
| Q9D5K1 | KFVKRLYFGLRVLPPKLVNLNFQQSLTEDQKLIKDGWEVNL   |
| Q80WB5 | ADSYLKHFASDRSHMKDSSGNWREPPPEYPC IETGDSKMNL  |
| P15927 | ISNPGMSEAGNFGGNSFMPANGLTVAQNQVLNLIKACPRPE   |
| Q9H2A3 | SPASTWSCTNSPAPSSSVSSNSTSPYSCTLSPASPAGSDMD   |
| P0C7M4 | GGGEEKDGGGAGVPGHLWEGNLEGTSGSDGNVEDSDQSEKE   |
| Q58DU5 | TLYSAVRPFGCSFMLGSYSVNDGAQLYMIDPSGVSYGYWGC   |
| P51911 | PKLGTDQPLDQATISLQMGTKNGASQAGMTAPGTRQIFEP    |
| Q3UZZ6 | EEMDHSVSPFMRKGISGDWKNQFTVAQYKFEEDYVKKMED    |
| O60930 | YTDSMFTINGITNWVQGWKKNGWKTSAGKEVINKEDFVALE   |
| P09629 | DSAKAAGAKEQRSDLAAESNFRIYPWMRSSGTDKRGRQT     |
| Q6ZT21 | KLFEMTGERRLGEEIKIKITNMFTQYRKLKCMTDESAPPD    |
| Q8BX35 | TCITCAVINRVQKANCNTNSAICGDCLPRFYRKRTRIGGLQ   |
| Q9QZ73 | RQFMIFTQSSEKTAVSCLSQNDWKLDVATDNFFQNPPLYIR   |
| Q9XSK2 | AVTNKVPDSCCVNITHNCGINFVVKDIHTEGCVEKIAAWLR   |
| P14231 | VAVKFLNVTPNVEVNVECRINAANIATDDERDKFAGRVAFK   |
| P28907 | FNTSKINYQSCPDRKDCSNNPVSFVWKTVSRRF AEAAACDV  |
| Q9P1T7 | GICTSEACCCCGDEMDDCNCPCDMDCGIMDACCESSDCL     |
| Q7YRQ8 | ICRLKVNKKQCGELREQYFFNLSSMTCKKFI SGGCHSNENR  |
| P50295 | IRREQYVNPQEFINSDLLEKNKYRKIYSFTLEPRTIEDFES   |
| Q8CBW7 | VICLNKRTRRSIQKLEWENNRLYHKLALHWKLT KRKCETS   |
| Q8R2Y9 | TCKVADKTGSINISVWDDVGNLIQPGDI IRLTKGYASVFKG  |
| Q9CQF3 | LFAVPKNYKLVAAAPLFELYDNAPGYGPI ISSLPQLLSRFNF |
| Q8NC96 | PPPPGGKVTIPPPSSSVAISNHVTPPPIPKSNHGGSDADIL   |
| O15120 | LGERMVRENKLVWIYPEGTRNDNGDLLPFKKGAFYLAVQAQ   |
| O15217 | VEFDEEFLETKEQLYKLDGNHLLFQQVPMVEIDGMKLVQT    |
| P33946 | ACSFTTVWMIYSKFKATYDGNHDTFRVEFLVIPTAILAFLV   |
| P05452 | TPQTGSENDALYEYLRQSVGNEAEIWLGLNDMAAEGTWVDM   |
| Q6Y1H2 | AALPFVRQAGLYSISLPNKYNFSFDYYAFLILIMISYIPIF   |
| Q8K4Z3 | GAAVKYLSQEEAQAQVDQELFNEYQFSVDQLMELAGLSCATA  |
| Q9DB20 | KSLNDITKREKFSPLTANLMNLLAENGLRGNTQGI ISAFST  |
| Q6P9G0 | HRYLPYNSHAASYTWKYEGKNLNMDFTL EENGIRDEEEFFD  |
| Q765N9 | AGVLFLLAALLTLVPVWSANTI IRDFYNPLVPEAQKREMG   |
| P97952 | VVWNGSRGTKDLQDLSIFITNVTYNHSGDYECHVYRLLFFD   |
| Q96SI1 | GWNQDPHVIRFPLNGYCR LNSVQVLERLRFQRGFSVAASCG  |
| P52801 | LRARNEDPARANADRYAVYWNRSNPRFQVSAVGGGGYTV E   |
| Q5SVD0 | STTIVYPKYPKTVYTTTLDYNCHKKLRFLSSVELEATEFL    |
| P22615 | LAETGYKFYPLMIY LISRAVNQFPEFRMALKDNELIYWDQS  |
| P43307 | LESRRKRRIQKVEMGTSQNDVMSWIPQETLNQINKASP      |
| Q6UWV2 | SISISNPTIKDNGTFSCAVKNPPDVHNI PMTELTVTERGF   |
| P20334 | GQELTKQGCKTCSLGT FNDQNGTGVCRPWTNCSLDGRSVLK  |

|        |                                            |
|--------|--------------------------------------------|
| P35509 | NFRVGGKIGCGNFGELRLGKNLYTNEYVAIKLEPMKSRAPQ  |
| Q99JY3 | IPQLRIVLLGKTGAGKSSTGNSILGEKVFNSGICAKSITKV  |
| P23812 | LENEFLVNEFINRQKRKELSNRLNLSQQVQIWFQNRMMKK   |
| Q923D2 | VLLGTGNDLSPTTVMSEGRNIVTAMKAHGVDKVVACTSAF   |
| Q91VR2 | VSSDRGLCGAIHSSVAKQMKNEVAALTAAGKEVMIVGVGEK  |
| Q80VP8 | LLASGLVFFFLFPHSVLVDDNGIKVTKVTFNEQDSLVLVDV  |
| P62577 | CTYNQTVQLDITAFKLTVKKNKHKFYPAFIHILARLMNAHP  |
| Q9D504 | DPNLVDVYSNTALHYAVCGQNISLANKLQYKANLEAKNKD   |
| Q3T0C6 | TKTDKKSFNQSLAEWKLFYINRTTGEFLGRATAKSWGLILLF |
| P97299 | RSNCKPIPANLQLCHGIEYQNMRLPNLGHETMKEVLEQAG   |
| Q96S21 | QARAYAEKNCMTFFEVSPLCNFVIESFTELSRIVLMRHGM   |
| O35075 | NVKERASLPKFFIRGHLSNTCAITQPLTGELVVEHSDAAI   |
| Q9QYI7 | SFGSGSSGFKSVMSSTEMVNGRKTTKRIIENGQERVEVE    |
| Q9QZC7 | AGVYQQPANQVIIRERYRDNDSDLALGMLAGAAATGMALGS  |
| P23184 | QWKCDGVFVSHIIDIKDNNINVDSTLIWLHLENYHSDIVK   |
| P12980 | QPQKVARVFTNSRERWRQNVNGAFALRKLPLTHPPDRK     |
| Q99967 | GGSTPGGSGSSGGGAGSSNSGGGSGSGNMPASVAHVPA     |
| P04156 | KPGGWNTGGSRYPGQGSPPGNRYPPQGGGGWQPHGGGWQ    |
| P62258 | DYHRYLAEFATGNDRKEAAENSLVAYKAASDIAMTELPPTH  |
| Q1JQA4 | GPLACGVPYTCCFRNTTEVVNTMCGYKTIIDKERLSVQNVII |
| O55144 | ASAQTPHPHEPISFGIDQILNSPDQDSAPAPRGPDGASYLG  |
| Q9H4A6 | RMDRRLALITYLAHASDVLENAFAPLLEQYDLATKRVQRQL  |
| Q8K201 | EEEADSNEEDPSMEEEDLLALNSSPATGKDTLDNGDYGEFDY |
| B6A8C7 | GSLPKPPLSAWPSSVVPANSVTLRCWTARGVSVFLRKG     |
| Q9WU03 | SSVLSVPRKQSAEDLSAEIFNYEYCVPKAVTGPCRAAFPR   |
| P99026 | SPRAIHSWLTRAMYSRRSKMPLWNTMVIIGYADGESFLGY   |
| P21583 | EGICRNRVTNNVKDVTKLVANLPKDYMITLKYVPGMDVLP   |
| O88456 | AAQYNPEPPPPRSHYSNIEANESSEVRFRKLFVQLAGDDM   |
| Q5U4N7 | FRKIRSSAPSSPFSFRALMSNTYLCFLTGPSSRENTQKS    |
| Q0VCY1 | TDLKFKGPFTDVVTTNLKLRNPSDRKVCFKVKTAPRRYCV   |
| Q16611 | WIAQRGGWVAALNLGNGPILNVLVVLGVLLGQFVVRFFK    |
| Q6P9H5 | TNNQALAWLDVTLARRHCGFNNRAQEEQEAQLRELMEKVE   |
| P63073 | AVVNVRAGDKIAIWTTECENRDAVTHIGRVYKERLGLPPK   |
| P26715 | IYSDLNLPNPKRQQRKPKGNKNSILATEQEITYAELNLQK   |
| Q1ZYL8 | YNCESSAQWKSAVQGLLNYINNWHKQDTSMRPRSSAFSWPG  |
| Q9WVS0 | PYFCRVFVFCFLIRLLTGEINGSADHRMFSFHNGGVQISCK  |
| Q9DAK2 | GGNKILPVIPLIIPKINALNRNRQIICVTLKVLQHLVVS    |
| Q56JV9 | KIASDGLKGRVFEVSLADLQNDVAFRKFKLITEDVQGNKC   |
| A7MBB3 | MCLAFWAIAGIWTVPFSLAVVNKAVNLTDGPPYISVCGNVPP |
| Q08091 | QREQELREWIEGVTGRRIGNNFMDGLKDGIIICEFINKLQP  |
| Q9BQR3 | RQLVQPGPHAMYARVRQVESNPLYQGTASSADVALVELEAP  |

|        |                                            |
|--------|--------------------------------------------|
| Q08D83 | GHPFKAYLDVDITLSSEAFHNYVNAAMVHINRALKLIIRLF  |
| Q00977 | MILVVAAKEVWGDEQADFCNTLQPGCKNVCYDHHFPIISHI  |
| Q29S19 | RRLFPQSPETRPILGLDVGCNSGDLSSVALYKHFLSLHDGET |
| 054830 | SDSYDQFMLEFLGQQEELLTKNLTYCHKYSIKVPEDIEEAQN |
| Q02878 | PLRRTHQKFVIATSTKIDISNVKIPKHLTDAYFKKKKLRKP  |
| Q35975 | SVRFGQFSSSSLTKRVALSSNFFSNHGTFLIIRTCLGVNIK  |
| A1XBS5 | VNEINAYAATETPHLKLGLMNFADFAKLQDYRQAEVERLE   |
| Q9JLK7 | MRTMGYPTEMELIELSQQINMNLGGHVDFFDVELMGFKL    |
| A1E959 | ELLLNLNNGQLLPLQLQGFLNSWIPPFSGILQQQQQAQIPG  |
| Q504M8 | KSKGGSEPATSTLPAAAAATNGPRLAHPRTVVRPGPEAPNG  |
| Q96L14 | KQLQAINAMIDPDGTLEALNMGFPSAMLSPPKQKSSFVN    |
| P04394 | PETPFDFTPENYKRIEAIKKNYPEGHAAAALPVLDLAQRQ   |
| Q497K7 | GDGPGLESVELPLPLETEHRNAMELEKVRMEFELTLKYLH   |
| Q5VST6 | SGMRVAFPDTKKTYCFDAFPNIDKISKITSPLVIHGTETE   |
| Q3SX30 | HWEVVTHGYGLGAGDQPGPNKKSELLPVEWNSNKDLYVL    |
| Q8R088 | KSSEKKIESEEDTNQERSPDNEDPGDSKDIRLTMEEVLLL   |
| Q62283 | DERSRAVDHVQRSLSCCGVQNYTNWSSSPYFLDHGIPPSCC  |
| Q2YDD6 | LLTDGYQNKTDNSELHCVLNSNSTACSIAGAGLLAFLLSS   |
| P52803 | LGFEFRPGREYFYISSAIPDNGRRSCLKLVFVRPTNSCMK   |
| A5D7C9 | LVVAVLRFIQLKPKVLPWLNISGLVALCLASFGMTLLGNF   |
| Q9WU03 | CLDKCAGVTENTTDDMARNRGADSSVLSVPRKQSAEDLSA   |
| Q8R4V2 | GLGWQEVLEAIKASRPIANPNPGRQQLEEFGWANSQKLRR   |
| Q9CWY9 | HIPVHSTDLTEQKLRACLEENVNEHSVHCPHTPVFVVTGGT  |
| Q9BUT1 | AVIGLTKSVAADFIQQGIRCNCVCPGTVDTPSLQERIQARG  |
| Q921H9 | VDYLEGIQKNFDEAAKVLKFNCEKYGHGDSYKLGAYVVTG   |
| Q9NVV5 | FFGSTTILMNFYLLGEVLNNYIWDTQKPPSWQDMKIKFM    |
| Q9CRD2 | KRKIAIRKAQGKTVEAIRELNEYLEQFVGDQEAWHELAEY   |
| Q3T0A3 | PLVCGSVAEGVVTSGSRICGNHKKPGIYTRLASYVAWIDGV  |
| A5D7A0 | EALGSADEELSAKLLRRADLNQGIGEPQSPSRRVFNPHYEF  |
| Q3UME2 | IYAGSKALSRLAVPVFFILHNVAEVLTCGYQKCVWKEKTSL  |
| 035565 | SVEIGVVAVKAINSNYLAMNKKGLYGSKEFNNDCKLKER    |
| Q9TTJ5 | VALRQSGGYVATVGTKFCALNWEDQSAVVLATVDKEKKNR   |
| Q8K015 | PGRKCKGGVLAHLERLEAQTNISNRKSEEPVRRKKESSLRT  |
| P97930 | VTLVLDRYAFSGVAFTGAKENFSLDWCKQPDVGLPKPDLIL  |
| Q8NDD1 | KNTKQANPSVLERDVTQEFNLEKARLEVHRFGITGYGK GK  |
| Q2HJH7 | NYLKKYHNTICGRHPIGVLLNAITELQKNGMMSFSFFQQA   |
| Q9P0W0 | EARVPQLSSLELRRYFHRIDNFLKEKKYSDCAWEIVRVEIR  |
| Q8BHC4 | RINAQLPLKDKARMANHVLDNSGEWSLRRQAAILLHAKLER  |
| 035740 | GAGNMNATSGIRHAMGPGTVNGGHPPSALAPAARFNNSQFM  |
| Q8N8R7 | CHKTYTRHTGFKTLQELSSNDMLLLQLRTGMTLSGNNTIC   |
| Q96F25 | VVAGSGGHTTEILRLLGSLSNAYSPRHYVIADTDEMSANKI  |

|        |                                             |
|--------|---------------------------------------------|
| Q96AQ7 | VARVTFDLYKLNPDQDFIGCLNVKATFYDYTYSLSYDLHCCGA |
| P20489 | TSADMVLVHGSFDIRCHGWKNWVRKVIYRNDHAFNYSYE     |
| Q8R3G9 | VFQSEFKCCLENGAADWGNFVEAKESCQCTGTDCATYQG     |
| P24042 | ISDILYADIESKAKELTVNSNNTVQPVALMRLGVFVPKPSK   |
| P06870 | DDENTAQFVHVSESFPHPGFNMSLLENHTRQADEDYSHDLM   |
| Q9Z1L2 | LTDBGYQNRTEPQLRCVLNSNHMACSFAVGAGFLSFLSCLV   |
| Q6P8I6 | QQTEIYVVPGETALAFYKAKNPTDKPVIIGISTYNVVPFEAG  |
| Q9ESJ7 | QQQGFQAENVTVTKNIRRVENAYHMEAEVCITTFTEFGKMQN  |
| P00846 | TKGRTWSLMLVSLIIFIAATTNLLGLLPHSFTPTTQLSMNLA  |
| Q8VCC1 | LRDTFRKVVDFHFRGLDILVNNAGVNNEKNWEQTLQINLVSV  |
| O00124 | RILLLLALLTLII SVTTSWLN SFKSPQVYLKEEEEKNEKRQ |
| Q5SRE7 | RAPVGSAPGTSFLGSEPARDNSLFVPTPVQRGALVLIHGEV   |
| Q9D7J9 | TCSEVMMLIRNHPVPI LAMVNGLATAAGCQLVASCDIAVAS  |
| Q8R088 | TRRTEVSKSSEKKIESEEDTNQERSPDNEDPGDSKDIRLTL   |
| P43274 | VSKGTLVQTKGTGASGSFKLNKKAASGEAKPKAKRAGAAKA   |
| P49069 | IKTTLVTAALLSGIPAEVINRSMDTYSKMGEVFTDLCVYF    |
| Q8BVD7 | SGSTVIYLPPEDEVWLEIFFNDQNGLFSDPGWADSLFSGFL   |
| Q62447 | QKDLKFLSEEEYWKLQIFFTNVIQALGEHLKLRQVVIATAT   |
| Q6PER3 | FEFIQWFKKFFDANYDGKDYNPLLARQQQDVAPPNPGDQI    |
| P50194 | FIHYDEKNNEWNLQVKNRDNTESSSSKIRDNTTIKKWFR     |
| P23946 | FVLTAAHCAGRSITVTLGAHNITEEEDTWQKLEVIKQFRHP   |
| Q64317 | PESLNSPVSGKAVFMEFGPPNQMSPPMSHGHYSMHCLHS     |
| P70195 | IDLCVISKSKLDFLRPFSVPNKKGTRLGRYRCEKGTAVLT    |
| Q9Y5K2 | GGGHQKQDSCNGDSGGPLICNGYLQGLVSFGKAPCGQVGVV   |
| Q149M0 | CNPCPKTWQWYGNSCYYFSINEEKSWSDSRKDCIDKNATLV   |
| Q8JZS9 | KAKVELRAINVGTDYEGVLNIHLTAYDMSLAESYAQYVHR    |
| Q58CY6 | VAGLRRFGCMVCRWIARDLSNLKGLLDHGVRVLVGVGPEAL   |
| A1XBS5 | TYGTIVKMRDDLKATLTARNREAKQLTQLERTRQRNPSDR    |
| Q3SZY3 | KSSVPASDDTYPEIEKFFFPNPLDFENFDLPEEHQIARLPL   |
| Q0VCD4 | GSVLDHSLES LIHRLRGLCDNMEPETFVDHEMVFLKGGQA   |
| A5D7U1 | IISVVLEARDQNKSVIGSWENPSDHCEGRAEYLLKGNFSTL   |
| Q96BQ1 | NVVGPTMCFEDRMIMSPVKNNVGRGLNIALVNGTTGAVLGQ   |
| Q9NUS5 | SDEQVPLHEAPRGAFLAAENPFQEPRTVVVLGVLSLGFAL    |
| Q2WG77 | YWPKSHSFDYLYSAGEILLNFPVQATINLYEDSDSADNEE    |
| Q91XE0 | NWKQHLQIQSSQSHLNKTIQNLASIQSFQIKHSENI LYVSS  |
| P35695 | NISGGIDKFWLEGQLRISAVNQVEFLESFLNKLKLSASKENQ  |
| Q9DB52 | VRMHSSRLHQIKQEEGMDLINRETVHEREVQTAMQISHSWE   |
| Q13868 | KRWKVETNSRLDSVLLSSMNLPGGELRRRSAEDELAMRGF    |
| Q3SY17 | IRGPIKEHLPTATTHSAHLVNDFIGGGLGAMLGFLCFIN     |
| Q2QD12 | MHMMVSKPEQWVKPMAVAEANQYTFHLEATENPGTLIKDIR   |
| Q9D8K3 | QALMAMLVYVWSRRSPHVRVNFGLLNQAPFLPWALMGFS     |

|        |                                            |
|--------|--------------------------------------------|
| Q3SX42 | ALEKQEKQLELEIKKMAKIGNKEACRVLAKQLVHLRKQKTR  |
| Q29RT9 | SKVGSQPCDHTVSSHSPNENIMRHLRKYLKAYQRCFSYVR   |
| Q14593 | VDINIYDWNNGGTPLLYAVRGNHVKVEALLARGADLTTEAD  |
| Q5IBH6 | QYRPIHFFLALYLANDMEEDNQAPKQDIFYFLYGKSYAQRP  |
| Q2HJH2 | QESYANVKQWLQEIDRYASENVNKLVLGKNSDLTTKKVVDN  |
| Q9NZC2 | PCQRVVSTHNLWLLSFLRRWNGSTAITDDTLGGTLTITLRN  |
| Q9D198 | LAAQKREQRLRKFRELHLKRNEARKLNHQEVVEEDKRLKLP  |
| Q95857 | SARNDIQRNLNCCGFRSVNPNDTCLASCVKSDHSCSPCAPI  |
| P26441 | ELMILLEYKIPRNEADGMPINVDGGLEKKLWGLKVLQEL    |
| Q62276 | LMKLVSDLKQFLILNDFPSVNEAIDQRNQQLRALQEEDRK   |
| Q95471 | WAGSALVILGGALLSCSCPGNESKAGYRVPRSYPKSNSSKE  |
| P04184 | IGIDEGQFFPDIVDFCEMMANEGKTVIVAALDGTQQRKAFG  |
| Q9JJG7 | MKDIENIITINEEESLNETSGNCQTEFEGVHSQKQNRQTCVR |
| Q9H765 | DEACVEVLLEYGANPNALDGNRDTPLHWAAFKNNAEVREAL  |
| Q8BH93 | AAPYPGPAGSYPTPAPHPALNNPYQVPSGPAGAPPMPGGPH  |
| Q9UKQ9 | KWEGPEQLFRVTDFFPHPGFNKDL SANDHNDIMLIRLPRQ  |
| Q7Z4H3 | VSDHMYRMAVMAMVIKDDRLNKDRCVRLALVHDMAECIVGD  |
| Q9ES81 | YALNDRVYIGKHHYDIRLPNYHMSTPDLRSRPLTEQFRN    |
| P06340 | AAIKAHLDILVERSRRRAINVPRTVLPKSRVELGQPNI     |
| P37141 | FGLVILGFPCNQFGKQEPGENSEILATLKYVRPGGGFTFNF  |
| Q8WWF3 | AWDPSQTMKKPKQNQLTPVTNSEVALVNAYPEQRARRQSQ   |
| Q8WU03 | KTSSNDKMELEFVDDDNKEGNSMFLDASHAGLVNEHWAF    |
| Q8C4A0 | FNLATATAVQISWKTSGAHANPAVTLAYLVGSHISLPRAMA  |
| Q9KIP8 | FKHIALEEIYALCSAYSTTYNMLALHLDHHESLDDIRRV    |
| A6QLZ5 | QADSVVQSDQPETLASSSFVNLFEMEGDCEVITESKQNPV   |
| Q06520 | VDYVVDKQQLLRKGVSGDWKNHFTVAQAEDFDKLFQEKMAD  |
| Q8WUE5 | VKPIRCIHTEEVCITSVHGRNGVIDYTIFFTLDSVKLPDGY  |
| A6NJY1 | AITGFNTCLSI VFYSGGMINNAIASLRNVCISLLAGIVLGF |
| Q15537 | YHKPLGFESGEVTPDQITCSNPEQYVGVYSSWTANKARLNS  |
| A5D7J5 | LCAEEIKATSYIECSALTQKNLKEVFDAAIIVAGIQYSDSQQ |
| P62258 | MVESMKKVAGMDVELTVEERNLLSVAYKNVIGARRASWRII  |
| Q9H8T0 | WQVLMYARRVYFKIDTASFLNPEAAVLYEKDIQLFKSKVVD  |
| Q0VD27 | HKVESESYQKIASSIGCSTNNILFLT DVSREASAAEEAGVH |
| A5PJS2 | RGGKPMPLYAFLLAFIFCTYNGYLQSRYSQYAVYADDWLS   |
| Q15520 | GDVWRKLFSTKYFLKIEKNGKVS GTKKENCYPYSILEITS  |
| Q8N9P6 | QRWMLPLRRGARLLPLASSKNPRARSPGLDPLGSSETLWSH  |
| Q6Q6R3 | NGRPYCHKPCY GALFGPRGVNIGVGCYLYNLPTPPASRI   |
| P58418 | LVMILFASEVKIHHLSEKIANYKEGTYYVYKQSEKYTTFSW  |
| Q15181 | KDPLNPIKQDVKKGKLRVANLFPYKGYIWNYGAI PQTWED  |
| Q58DW6 | LAFETVLKEIFAKVSKQRQNNARTNAVTLGSGPAGQELGPG  |
| Q8BX07 | ICVVIDLDETLVHSSFKPINNADFIVPEIEGTTHQVYVLK   |



|        |                                             |
|--------|---------------------------------------------|
| A3KN05 | STEEQPQQRQKTMIILGFSNPINWVRTRIYSFLIWAYFDQ    |
| Q30167 | LLVCSVNGFYPGSIEVRWFRNGQEEKTGUVSTGLIQNGDWT   |
| Q0VCU8 | LKKLQEESDLELAKETFGVNNTVYGIDAMNPSSRDDFTTEFG  |
| Q6UWM5 | SSKIPSIDPHFIDNCIEAHNEWGRKVNPPAADMKYMIWDK    |
| P04769 | TFNKIILDHLKSTENITKAFNSCHTVPINVPETVEDVRKTS   |
| A6NJY1 | FQPLLFGLVGAEVSVSLESNIVGISVSTLSLALCVRI LNI   |
| Q3TC33 | VISEHRAVAQLSLELEKEQNRTSSFREALISQGRKLAEK     |
| P62491 | YRGAVGALLVYDIAKHLTYENVERWLKELRDHADSNI VIML  |
| Q722X4 | KPVIELWKKHTLAREDVFPANALLEIRPFQVWLHHLDHKGE   |
| O69395 | SKVMAAAAVLKQSETQKQLLNQFVEIKPADLVNYPNPIAEKH  |
| Q5HZI9 | LRGPIKESLPTATTYSAHLVNDVICGGVLGAVLGFLSFPIN   |
| Q8R0K4 | IPFRLREIMRSRQEMKKTLSNKKRKEAQVAFKKTLEKEAK    |
| Q00623 | EQMRESLAQRLAELKSNPTLNEYHTRAKTHLKTLEGEKARPA  |
| Q53RY4 | ARGPRRLMRVGLALILVGHVNL L LGAVLHGTVLRHVANPRG |
| P11912 | I IQNVNKS HGGIYVCRVQEGNESYQQSCGTYLRVRQPPFRP |
| Q86XT2 | QGLQLEREACLASNYALAKENLALRPRLEMGRAALAIKYQE   |
| Q96LD8 | QQNSYDCGMVICNTEALCQNFRRQOTESLLQLLTPAYITK    |
| Q8NGY7 | CDILPVMKLSICINTTINEIINFVVRLFVILVPMGLVFI SYV |
| P58499 | NLLMGEQLGNVARGINIAIVNYVTGNVTATRCFDMYEGDNS   |
| Q80ZS3 | RKAQQAITEHRELMAWNDRNRMQELRIARLQLEAQAQEV     |
| Q8C6C7 | KCPSGIPLNIWNKFQELHKKNSEQKNSTPRFRQKRRKRKSK   |
| A4IFN5 | FCALMIVEEMAVLHEVKTDRNHCLHAAITTLVVALGFLTFI   |
| Q62N79 | HMISMHPITRKDASTSMTMENSLILEDPFECNDSGEDCTHS   |
| P07203 | MNELQRRLGPRGLVVLGFPNCQFGHQENAKNEEILNSLK YV  |
| Q3TB82 | GTVCGASSGDDDDSDREGNGDGDWPTQVEFYASGVSWSA     |
| O95073 | TKKVMEMIPQISSFCVLRDRNHISANLDEEAQAGTSSLQV    |
| Q6IRU2 | RAEVSELKCGDLEELKNVTNNLKSLEAASEKYSEKEDKYE    |
| Q9JM14 | LRPDLAEKVASVYESPGFFLNLEPIPGALDALREMNDMKDT   |
| Q2KIR7 | MKDDL DHYTNTYHVYSEDLKNCQEFDLPEVINWKHLQIQ    |
| P09326 | HMTVVSGSNVTLNISESLPENYKQLTWFYTFDQKIVEWDSR   |
| Q9D3W4 | TYCSTMVQHCEALNRSVQVNLDPAAEHFNYPVMADIRELI    |
| A2VE58 | VNEGYVNADSGPELRCVFNGNAGACRFGVALGLGAF LACSC  |
| Q96PB8 | VICKTSVLDEHAGRPFLNAANDADLCNLPKKTTDYAMLVTM   |
| P01213 | DCLSRCSLCAVKTQDGPKPINPLICSLQCAALLPSEEWER    |
| A1A4L1 | QLFTRGFEDGLGFEYVIFKNNDEKRTVCLFQGGPYLQGVPG   |
| P16110 | SGKPFKIQVLVEADHFVAVNDAHLLQYNHRMKNLREISQL    |
| A6NGA9 | FAGIISLLNYLTSRSPACDENVTVIPTERSRLGVGPVTVS    |
| Q32KW0 | DYIGGSHYVIQPHDDTEDSMNDHEDTNGSKESFREQDIYLP   |
| Q9UKR8 | SGIILVGLGIGGKCGGASLTNVLGLSSAYLLHVGNLCLVMG   |
| Q504P2 | LQRAKEELQENVFLQLKHNLNSSKIKNLSAMLQSTATQLC    |
| P14207 | YSRSGRCIQMWFDSAQGNPNEEVARFYAAAAMHVNAGEM LH  |

|        |                                             |
|--------|---------------------------------------------|
| Q9D7S9 | DAELVKYKDQIKKMREGPAKNMVKQKALRVLKQKRMVEQQR   |
| P48060 | RDQVKRYYSVVYPGWPIYPRNRYTSLFLIVNSVILILSVII   |
| Q9BUE0 | LVELSVVAPAGQDMVSDDMKNFAEQLKPLVHLEKIDPKRLM   |
| Q7YRQ8 | EFMYGGCEGNANNFETLEACNEACWKIEKVPKICRLKVNKK   |
| Q9NYV7 | GISRFCLQWASMLNNFCSYFNLNYVLCNLITITWEEFNILTF  |
| P0DMM9 | LALLPQTLDDQKVKVYVARNPKDVAVSYYHFHRMEKAHPE    |
| P15428 | VYCASKHGIVGFTRSAALANLMNSGVRLNAICPGFVNTAI    |
| Q5EAE5 | QRLSPNTMVTPHKKSMLGNGNYDVNVIMAALQTKGYEAVWW   |
| Q3TBW2 | LLRQDIVAVFRDNRMIAVCQNVALSATEDKLLLRHQLRKHKI  |
| Q8BTG6 | REQPIPWKVQFNLGNSSRPSNQCRRNSVQGHLLTDELGYVC   |
| Q60720 | ALLFKLGSKYSTFEPEGVLANVLGLLLVCFGVVLYILAQA    |
| Q5E995 | PRVLQHKRRRIALKQRTKKNKEEAAEYAKLLAKRMKEAKE    |
| Q8NGU1 | FIIIGSLIPTIVSYTYIISTNLKIPASAGWRKSFSTCASHF   |
| Q96BX8 | VHVIHFFDRIAQMGEAHVNTCYKHFFYFVKEFGLIDTKE     |
| F6YCR7 | LFEETQYPDLLTRGELARTLNVPEVKVWFTNRRAKQRKI     |
| A6NCN2 | ATVIRHGETLRRTKEEINELNRMIQRLTAEVENAKCQNSKL   |
| Q9BPW8 | AVLPKLHLDEDYPCSLVGNWNTWYGEQDQAVHLWRFSGGYP   |
| P57735 | EDYNFVKVVLIGESGVGKTNLLSRFRTRNEFSDSRTTIGV    |
| Q58DW6 | VVLIGESGVGKTNLLSRFRTRNEFSDSRTTIGVEFSTRVM    |
| Q8BWY2 | ISLYSGTSTVTRRAEPRHSENGTPSSVWRPVALTLLTCLV    |
| Q96DX5 | GMDGSKPAGPRDFPGIRLLSNPLMGDAVSDWSPMHEAAIHG   |
| Q92527 | AVINNNPKMKVFLLEKADVNASDNYQRTALILAVSGEPPC    |
| Q60653 | SDFNLKEEMLTNRSIDSRPGNELLESLNREQNRGYSETKTD   |
| P53516 | PDDVAGKVEWQRAGNRLKGVNPTPFYINLSTLTVGGKEVKE   |
| Q7L4S7 | IKQRPFPYEHKNTWSAQNCKNGSCVLDLSKCLFIQGLLFA    |
| P49069 | EEAMKLRKQLISEKPSQEDGNTTEEFDSFRIFRLVGCALLA   |
| P23946 | LKEKASLTLAVGTLPPPSQFNFPVPPGRMCRVAGWGRGTGVLK |
| Q9NUN7 | IFLLGFLEWNI DNIFCESLRNFRKKVPIIGITTFHAWWH    |
| Q9D9B4 | TPSLEYLSLLGNVACPNELVNLEKDEEDYKRYRCFVHLKLP   |
| Q17QU3 | RKFDPKGNEIEPNFSATRKVNTGFLMSSYKVEAKGDSDRLT   |
| Q9CPR5 | ARGCGTSLDLLRSLPRVSLANLKPSPNRKRERRPRDRRRG    |
| Q9CQE6 | QRNILASNPRVTRFHINWEDNTEKLEDAESSPNLQSLST     |
| P80311 | EDIGRVVIGLFGKTVPKTVDNFVALATGEKGFYKDSKFHR    |
| Q8TAF8 | CFSVLVMALFIQPYWIGDSVNTPQAGYFGLFSYCVGNVLSS   |
| P62259 | VIGARRASWRIISSIEQKEENKGGEDKLMIREYRQMVETE    |
| Q8BH49 | PSVAPQRPPLPPRRRASAANGPLASFAQLHARYGLEVQAL    |
| P20718 | EQERTQQFIPVKRPIPHPAYNPKNFSNDIMLLQLERKAKWT   |
| Q15014 | ENPPSGSVRKTRKNKQKTPGNGDGGSTSEAPQPPRKRARA    |
| Q95249 | EIEQLLARLTGVNDKMAEYTNAGVPSINAAALMHTLQRHRD   |
| P47741 | YDTCKQCTQCNHRSGSELKQNTPTQDQTVCRCPGTQPRQD    |
| Q0VCI6 | EPHAELDAKGGCTAYDVAVNSDFFRMQNSDFLRELVITI     |

|        |                                              |
|--------|----------------------------------------------|
| Q96PM5 | EVAQTPMPSEYQNMTVDILCNDNCNGRSTVQFHILGMKCKIC   |
| O60762 | FIRKQKEGNFDIVSGTRYKNGGGVYGWDLKRKIISRGANFL    |
| P21337 | KHHTRSAPLPTESWQQFLQENALSFRKALLVHRD GARLHIG   |
| Q3KR88 | IHTEGLFRKSGSVIRL KALKKNKVDHGEGLSSAPPCDIAGL   |
| Q8K2U2 | LLHGISATRVDEL DATSLPPNATA CKSALPGAHLVRGTRVS  |
| Q8BVA2 | LCCDNCHSHVALALNLMRYNNSTNWNMVTLCFCFLIYGKYV    |
| P08883 | DPKKIQSTYSGDSGGPLVCNNKAYGVLTYGLNRTIGPGVFT    |
| O15260 | KTKLAALTLVVWLFAINVYFN AFWTIPVYKPMHDFLKYDFE   |
| O88822 | TLSYFVYDHS LMKHPQFLKNQVSREIVFTVKS LFWIS IPT  |
| Q99967 | GPGTVNGGHPPSALAPAARFNNSQFMGPPVASQGGSLPASM    |
| P31213 | VLLGLFCVHYFHRTFVYSL LNRGRYPAILILRGTA FCTGN   |
| Q6NS38 | VAVVRLPLAHGSL LMMNHPTNTHWYHSLPVRKKVLAPRVNL   |
| Q9CXK4 | NNLSWLSYGV LKGDGTLIIVNSV GAVLQTLTYILAYLHYSPQ |
| Q8BWP5 | FSMIKPF LTEKIKDRIHLHGNNYKSSMLQHFPDILPREYGG   |
| Q8TCD6 | LFNFIRKNKDKFDCIIISDSNSVFI DWLEAASFHDIFDKV    |
| Q9D0M0 | VDGRGCEDYRCVEVETDVVSNTSGSARVKLGHTDILVGVKA    |
| P48230 | IFPALVFLGLKNNDCCGCCGNEGCGKRFAMFTSTIFAVVGF    |
| Q9D2R4 | RHDFLESAPGLGMFVTVTYNDVLLSKLYGAQGTFFYFTSH     |
| Q9WVG7 | EITAGGSGAALKTKPRFDFANLALAA TQEDPTKLGRGEGPG   |
| Q91VT1 | RENDLTEGVDEDMIVTQSQTNFICPI TQLEMKKPVKNKMG    |
| Q17QR6 | GPEDERDHWQFYFLSKRRRNL LRPCGEEDLEGWCDVEHG     |
| P10738 | IHQDILQFQFPNKQRYKIVGNIPYHLSTQI IKKVV FESHAS  |
| Q8BPA8 | MAEYDEKTSELLVRKWRVKNALGALGQWQLEVGEPVPSGA     |
| P60334 | FAGDEVNVEEVQAVLEAYESNPAEWALYAKFDQYRYTRNLV    |
| Q9QVN7 | AIREHQMARTGGTQTDLFTCNKCRKKNCTYTQVQTRSSDEP    |
| Q9HBM1 | KEEERMVEMFLEYQNI SRQNKLIQEKKDNL LKLI AEVK GK |
| Q6FIF0 | TAQQPSEEQSKSLEKPKQKKNRCFMCRK KVGLTGFECRCGN   |
| P02702 | PVKAACHRFDFYFPTPAALCNEI WSHSYKVS NYSRGSGRCI  |
| Q6PHW0 | DSSDLHQAEEDA DEWQESEENVEHIPFSHNHYPEKEMVKRS   |
| P20615 | KQGTPEYSLETSAGREAVLSNQRAGYGDNKICEGSEDKERP    |
| Q3SZ22 | QPGETLRQTAERTLATLSEN NLEAKFLGNAPCGHYKFKFPQ   |
| Q5TBK1 | RYEHDVTFH SVLHAEKPSRMNRNQDRNNALP SNNARYWNSY  |
| P61982 | KELEAVCQDVL SLLDNYLIKNCSETQYESKVFY LKMKGDYY  |
| P15949 | GIDAAPPVHSRIVGGFKCEKNSQPWHVAVYRYNEYICGGVL    |
| Q9NP72 | WLNELETYCTRNDIVNMLVGNKIDKENREVD RNEGLKFARK   |
| P01246 | EDGTPRAGQILKQTYDKFD TNMRSDALLKNYGLLSCFRKD    |
| Q99LB2 | SVVIVGSVAGFTRF PPSLGPYNVSKTALLGLTKNFAAELAPK  |
| Q9HAN9 | KKKGLIPAYHRVIMAE LATKNSKWVEVD TWESLQKEWKETL  |
| Q53H82 | RVLYTPGHTDDHMALLEEENAFSGDCILGEGTTVFEDLY      |
| Q5JQC4 | DSDIGPATEEEEEEGNEAANFDLAVVARRY PASGIHFVLL    |
| P08218 | SLQYSSNGQWYHTCGGSLIANSWVLTAAHCISSSGIYRVML    |

|        |                                            |
|--------|--------------------------------------------|
| P61092 | QHKSITTLQGEDIVFLATDINLPGAVDWVMMQSCFGFHFML  |
| Q5JWF8 | VCHATPIYAGHSWHQATFRLNVAGSTLSRYLRDLLVAANPD  |
| Q8WU68 | SFFEEVFTLQEKYGEIEEMNVCDNLGDHLVGNVYVKFRRE   |
| Q80WR1 | KELTKHYQGDNDTDVFSATWNSVMITFGCCGVNGPEDFKLA  |
| Q08331 | EIWKFHDADGNGYIEGKELENFFQELEKARKGSGMMSKSDN  |
| Q9JLK7 | ETADMIGVKELRDAFREFDTNNGDGEISTSELREAMRKLGH  |
| Q32KN7 | QCTLAIKEGRPLPPPPPTVNPDIQCPYCKRRFNETAASR    |
| Q60930 | GTLETKYKWCEYGLTFTEKWNTDNTLGTBIAIEDQICQGLK  |
| Q3ZBR0 | HLSSLQLFYGKPPGKGTQONPRQHNLRRRETTAEAPLLT    |
| Q8BJK1 | TDSEGRYFIDRDGTHFGDVLNFLRSGDLPREHVRVAVHKEA  |
| Q9UBV8 | DSDHSGYISMKELKQALVNCNWSSFNDETCLMMINMFDKTK  |
| Q8IZJ6 | HNLQLFVPSITIGAFGPTSPRNPTDLCIQRPTIYGVSKVH   |
| P09497 | ESKEETPGTEWEKVAQLCDFNPKSSKQCKDVSRLRSVLMSL  |
| Q8N4C7 | ILKSQAAMFRHFQQIMFIYNDTIAAKQEKCKTFILRQLEV   |
| Q7L8S5 | FSNPETSDFSFGYDDFMIYCDNIVRTTAWGGQLELRALSHVL |
| Q8CB49 | LKQEEEDQPSENDHLSTKEGNSGKDPGSRRI SRQQSITKAT |
| P04233 | PLKVYPPLKGSFPENLRHLKNTMETIDWKVFESWMHWWLLF  |
| Q8BVZ5 | YFRKEPTKRYSLKSGTKHEENFSAYPRDSRKRSLGSIQAF   |
| Q9CR35 | TFGCGVPAIQPVLTLGSRIVNGEDAI PGSWPQVSLQDRTG  |
| Q3T166 | VSLWDHVVSLKNLCFTCYTSNILNWKALIYQAKGYVVVKPK  |
| P59796 | HVLFVNVAAYUGLAAQYPELNLQEEELNFGVIVLAFPCNQ   |
| A2RRY8 | GKKKYDIDPRNGIPKLT PGDNPYMFPEQSKEFFKAGATLPP |
| P15483 | ESLKTLCVRGIPPKQGDWANNEKEFVGMKLNVSINTCIKL   |
| Q7YRA3 | QIDIYVQLQADGGTYAACVNAATLAVLDAGIPMRDFVCAC   |
| Q9BRQ6 | KEPSSPPPAPTSSTFGLQDGNLRAPHKESTLPRSGSSGGQQ  |
| Q3UC65 | DATKNTSEKSTQRNIAFSSNNSVAKPLQKTTKAAVEEKSS   |
| Q92564 | LIYRYAFDFAREKQQRSLDINTAKCMLGLLKGKIWPLFPVF  |
| P12979 | RLKKVNEAFEALKRSTLLNPNQRLPKVEILRSAIQYIERLQ  |
| Q6PIL6 | FEDFIKGLSILLRGTVQEKLWAFNLVDINKDGYITKEEML   |
| Q9QY76 | DRNVCFKVKTTVPRRYCVRPNSGVIDAGASLNVSVMLQFFD  |
| Q8TDQ1 | APVTQEETSSSPTLTGHHLNDRHKLKLSVLLPLIFTILLL   |
| Q8MKI3 | KKQTAREMKKVLAEERRKPLNIDHLSSEDKLRDKAKELWDTL |
| Q5XG99 | PVFYLVYFKIQASGETPNSLNTTVIPNGSMAMGTVPQQAPR  |
| Q99807 | GKEGAMACTVAVEESIAHHYNNQIRTLMEEDPEKYEELLQL  |
| P53519 | KNNTPYIISFSEVFFDSKVNNAKDILYVKPYSEKKIDISN   |
| Q8R173 | HHCSVCKRCIRKMDHHCWPVNNCVGENNQYFVLFMYIAL    |
| Q6ZRR5 | LVLGESGTEVNAVLFGSELTPLLQMRWFLRETGHYHSFTG   |
| Q8VCQ3 | SSTWQKFAANTGKAKDIPINLPLDFPSPPELPLMELSEDI   |
| Q8BH58 | VEKLADELHMPSLPEMMFGDNVLRIQHSGSGFIEFNATDAL  |
| O43688 | MIGRLRPNFLAVCDPDWSRVNCSVYVQLEKVCGRNPADVTE  |
| Q969U7 | LKFVSEGDNIPDALGLVEYLNWLQILKPLSDDPTVSASRW   |

|        |                                              |
|--------|----------------------------------------------|
| Q9BSU3 | RLGLAQKLMQASRAMIENFNKAVVSLHVRKSNRPALHLYS     |
| Q8WUU5 | GGGGFGAATFASTSATPPQSNNGGGGKQSKQEIHRRSARLR    |
| Q8WUD1 | YYRGAAGALLVYDITRRETFNHLTSWLEDARQHSSSNMVIM    |
| Q9Z0F5 | LATQYMSFWELLSLTFDFVLNVAVLRCHPLTIFTFHVINIW    |
| Q9P0P8 | GLDIGRNKVEDAFYKGEIIRLNNEEKLWKKSRVTKVGDITLDDL |
| P20645 | VCREAGNHTSGAGLVQINKSNGKETVVGRNLNETHIFNGSNW   |
| Q86WI0 | YWLFGSQMGKPVSFSTFRRCNYPVRGEGHSLIMVEECGRYA    |
| Q32LB5 | MSPYTNGTFCSMCQGDTCENNLRCNKERDKSQRYPNWNPSG    |
| Q8R023 | YRYDEQLSLCLERLSSGDKKNVQLQNKYVRCVRAEVRHL      |
| P57729 | KPVSVVLLANKCDQGKDVLMNNGLKMDQFCKEHGFVGFET     |
| Q8BTZ5 | QGNTALHLCGHVDTIQFLVSNGLKIDICNHQGATPLVLAKR    |
| Q9H2K0 | MEKANPKTGPTLRKELILSSNIGQHDLDTKTKQIQQWIKKK    |
| O08585 | FYKQPFADLIGYVAABEAFVNDIDESSPGTEWERVARLCDF    |
| O95721 | VFGGLVNYFKSKPVETPPEQNGTLTSQPNNLKAEIATSKE     |
| Q2KI11 | VVEWFYRPEGGKDFLIYEYRNGHQEVESFFQGRQLQWNGSKD   |
| Q9QWZ1 | CFATKNGIKVTVENAKCVQANAFIQADVFQEFVIQEEVTF     |
| Q9CY45 | LQEFYAEQKQSVNPRGDDKYNVGVIEENWQLSQFWYSQDTA    |
| Q9D1N9 | KELVRVEATVIEKTESWPKINMKFRKRKNFRKKIIVNFPQT    |
| P97952 | AEMVYCYKKAIAATEAAAQENASEYLAIITSESKENCTGVQV   |
| Q9NWC5 | DILCFTISSLPVSLTKMLSNALFVEAFIFYNHHTGREMLD     |
| Q06432 | AMTAVVTDHWAVLSPHMEHNTTCEAAHFGLWRICKTRIPM     |
| P11049 | AESHYREGCAQGLQKWLHNNLISIVGICLGVGELLELGFMT    |
| A5D6W6 | HVNPRTIFASHGNFFNIKVFNSAWGWTCTFLGGFVLLVVFL    |
| P68252 | THPIRLGLALNYSVFYYEIQNAPEQACHLAKTAFDDAIAEL    |
| Q9NVV0 | YLVSVMAVKRQPGAAALAWKNPISSWFTAMLHCFGGGILSC    |
| Q9NPC8 | TFGFTQEQVACVCEVLQGGNIERLGRFLWLPACEHLHKN      |
| Q8BFX1 | RKALRGKENKGSVEIMRKDLNDARDLHGQAESAAAVWKGHV    |
| Q9CQE6 | FSKLQRNILASNPRVTRFHINWEDNTEKLEDAESSNPNLQS    |
| Q15006 | LENLELSRKYFAQALKLNNRMRALFGLYMSASHIASNPKA     |
| A5D9A7 | VSGINEKLFVSLKNGTKTYSNLPSEAVFANCAGMLVVVFGL    |
| Q05B67 | HLITSAVWFGTFYYAAMKGVNVVFPFLELIGLPDSIVNILKN   |
| Q2HJ48 | LSGDKSLIEEVFPEIGDVMCNSVNAGWNHDSHIVIRFPPLNG   |
| Q28203 | KQYPVNSLCCDLCPGQKLVNDCTEVSKTECQSCGKGEFLS     |
| Q91WN2 | INTTALITGCTNAAGLVVVGNFQVDHAKSLHYIGTGVAFTA    |
| Q9D0Z3 | LELLFDYIEIEREPLLFHVFSNAGVMLYRYVLELLQTHQFR    |
| Q9BXJ1 | CLRCCDPGTSMPATAVPQINITILKGEKGRDRGLQGY        |
| Q9D6Y7 | VQMEAAALRSKEEYQKVLKHNFGPITTDIREGQVFYYAEDY    |
| Q8K2Y7 | VNPKDAAHSGCRSSLSLLHKNTPHVTSLFQCKLLHTLSRK     |
| Q9DCI3 | ENTLTGSQSSHASLRDIHSINPAQLMARIESYEGREKKGIS    |
| Q7Z7J5 | INKVCRDTRLRWCQQGLSTNGKIEVYLRHRHAYPEQRQ       |
| Q8N9N7 | ESLPPLLIKFTLLKSLSLNNNKLTVLPDEICNLKKELETS     |

|        |                                              |
|--------|----------------------------------------------|
| O95619 | DPNERPVTLYHLLKLFQSDTNAMLGKKTVVSEFYDEMI FQD   |
| Q9CQF4 | SSHKL CASWNRYLYFSSTKLNNTSNYKTLFRNIFSLRLEPELL |
| P80724 | KDKDKKAE GAGTEEEGTPKENEQAAAETPEVKEGKEEKEPE   |
| P26717 | TFSEVSLAQDPKRQRKPKGNKSSISGTEQEIFQVELNLQN     |
| Q9H082 | MASFHSLPSWIEECKQHLLANDIPRILVGNKCDLRS AIQVP   |
| Q9D1G1 | QWLQEI DRYASENVNKL LVGNKSDLTTKKVVDNTTAKEFAD  |
| Q8BVA2 | TAVHDASEEYKHRMHNLCDDNCHSHVALALNLMRYNNSTNW    |
| Q5TZF3 | YAACMAGQSDVIRALAKYGVNLNEKTRRGYTL LHCAAAGR    |
| Q3UTB7 | KKTNPDKDGPDIKPNLWMMVNPVMVYPPGKLEVAVKEDQS     |
| P63013 | NLTEARVQVWFQNRRAKFRNRERAMLANKNASLLKSYSGDV    |
| P35276 | SPRDAADQNFDMFKLLLIGNSSVGKTSFLFRYADDSF TPA    |
| Q99LU8 | YEKQFLHVLRSRKDTGIVVNNPNQSVFLFIDRQHLQTPKNK    |
| O75636 | WSSYRAGFGNQESEFWLGNENLHQLTLQGNWELRVELEDFN    |
| Q96S90 | LFNGLDSEEEKDGEEKVHPSNSEVWPHSTERKKQETGAGRA    |
| Q76JU9 | LLTLLCLGPYNASNVASF INPDLGGSWRKLG LITGAWSVV   |
| Q96DN0 | EINSLHMVTEYNPVTVIGLFNSVIQIHL LLMNKASPEYEE    |
| Q8R1H8 | ELLTETDLGESQKQLKKKQKNRVAAQR SRQKHTSKADALHQ   |
| Q9D0S4 | SLPDLVSLGHSWVFAITRHHNRVPREGQPEAEAAVPSGFQA    |
| P24668 | VCREASNHSSGAGLVQINKSNDKETVVGRINETHIFNGSNW    |
| Q13643 | KYIQTDSGPHYCPCYDNTFANTCAEQQLIGHDSRELFYED     |
| Q9H765 | NAECVRALLES GASVNALDYNNDT PLSWAAMKGNLESV I L |
| Q8K3A2 | EKQRFTLQFGEFSTGLLIRANQGHSLQVPELELTPLETPQA    |
| Q8N6G2 | LNEDIFLWTLPHCQQTGTLKNCLPWKI PASMKEVNKALSNO   |
| P57087 | VYYQQLQGDFKNRAEMIDFNIRIKNVTRSDAGKYRCEVSA     |
| O88384 | RLLGTAGTEBKKLVRDFDENQOEANETLAEMEELRYAPL      |
| Q6P1S2 | EPNVVARISQWADHRLRVRNISTGMATAGIMLLRSIRLT      |
| Q9XSA7 | HPESNTAGMDIFAKFSAYIKNSRPEANEALERGLLKT LQKL   |
| Q80WB5 | YNSCYCEENIWKLCEYIKTHNQYLLEECYAVFISNEKKMVP    |
| Q9CZ04 | FRLLTVFAYGTYADYLAEARNLPPLTDAQKNKLRHLSVVT L   |
| Q86W74 | DICQLLHKFGADLLATDYQGNTALHLCGHVDTIQFLVSNGL    |
| Q4VC05 | VTPENSSSPGMMDHDDNSNQSSIADASPIKQENSSNSSP      |
| P28663 | AEAERVKASHSFLRGLFGGNTRIEEACEMYTRAANMFKMA     |
| Q9ESL8 | GILRRRQLYCRTGFHLEIFPNGTVHGTRHDHSRFGILEFIS    |
| Q3KQJ0 | LSPSFQVCMRKIQCYHVSFCNFKKQKAVLPPKKRSTIT YLL   |
| A2A5I3 | VCSHYTQMVWASSSRLGCAINTCSSINWGNWQQAVYLVC      |
| Q9BUN5 | LQHSFLTEVTDVYEMEGGLNLLNDFHSGRLQAFGKECSFE     |
| Q8C7N7 | WLVSLLLSSVFWFLVRVITDNRDGPVQNYLLIFGVLLSVCI    |
| Q9GZU7 | ICVVIDLDETLVHSSFKPVNNADFIIPVEIDGVVHQVYVLK    |
| Q8IXQ9 | NDIDPIAGMAITLNCELNRLNFPFILIQNI LNLEQDKWDLV   |
| Q60652 | KQWAWIDNGPSKLDMKTRKMNFKPGGCI FLSKTRLEDTCN    |
| P13972 | WLFCKNSNVIVDYCRGLRTNITNDRMLEFKNKSTEI QWKV    |

|        |                                            |
|--------|--------------------------------------------|
| P08505 | VGGLITHVLWEIVEMRKELCNGNSDCMNNDDALAENNLKLP  |
| Q9NYN1 | SSVFGKPRAGSGPQSALEVNLAAILGRRGAGKSALTVKFLT  |
| Q91ZR1 | RETYNSLAAWLTDARTLASPNIVVILCGNKKDLDPEREVTF  |
| Q53H82 | SGDCILGEGTTVFEDLYDMNSLKELLKIKADIIPGHGPV    |
| Q2LGB5 | VSAQPRCSEEDLKAIQDMFPNMDREVIRSVLEAQRGSRDAA  |
| Q78HU3 | MDGVPFTHLHPRFEGKSCGPLNLSAFGDLTIKSLADIEKEYN |
| Q8R2H9 | ARGLLTLRPFHTHSCSRCPANMCKHKVLSLEYLRERARDGVH |
| Q91VE3 | VCNDTLQGLVSWGTYPCGQPNDPGVYTVQVCKYKRWMETMK  |
| Q9BYD2 | KAGEATVKFLKSCRLEVMKNNVKWELNPEIVARHFFKNLG   |
| Q9EQQ2 | QFGYVYGISAIIGCLGMFCLLNLMSTGVSFGCVASVLGYCL  |
| Q13445 | ADGVHTVEPTEAGDYKLCFDNSFSTISEKLVFFELIFDSLQ  |
| Q9CXW3 | VQVHFTERSFDLLVKNLNGKNYSMIVNNLLKPISESSSKK   |
| Q9D1H9 | PVFCDMTTEGGKWTVFQKRFNGSVSFFRGWSDYKLGFGRAD  |
| O75558 | AAEAQHGPSAVARISRAQYNALTLTFQRAMHDYNAEMKQ    |
| Q9WTN0 | GLFFQIRDDYANLHSKEYSENKSFCEDLTEGKFSFPTIHAI  |
| Q9JIY7 | VVCIFFLFLFLWFLASKPWKNYVSKLCLTDMADITKSYLSV  |
| Q9H009 | SKLGLLQVTGVTRVTIWKSKNIFVITKLDVYKSPASDAYI   |
| O75832 | NPDAKDHYEATAMHRAAAKGNLMIHILLYKASTNIQDTE    |
| Q2KID0 | FIWVYPTPEHKEDDAGGFIANLEPVSLTDREVISRLRNCIV  |
| P11403 | KLFGVPPFTDECKFKEILPNNYAYESYAYPGMFALSKN     |
| Q47098 | AELLAGAGFDWLLIDGEHAPNNVQTVLTLQQAIAPYPSQPV  |
| Q8TDC0 | SYRDYQSDGRSHTSPNDYRNFNKTVPVFGGPLVGGTFFRP   |
| P31269 | FSENNAEENESGGDKPPIDPNNPAANWLHARSTRKKRCPYTK |
| Q7Z7D3 | GRTAVFADQVIVGNASRLKKNVQLTDAGTYKCYIITSKGKG  |
| A6NKC4 | FTEGEPLALRCHAWKDKLVYNVLYRNGKAFKFFHWSNLT    |
| Q3UFF7 | KETNSKLSLGVSTTFHSLPLNLHNLKTELEKLSWILTR     |
| Q92826 | YATLDGAKDIEGLLGAGGGRNLVAHSPLTSHPAAPTLMFAV  |
| O95983 | VRQTASIFKQPVTKITNHPSNKVKSQKAVDQPRQLFEWK    |
| P0CI32 | QFFPQPADFTGPYVMLTSRRNNRALSVMINADAGLAIRGI   |
| Q2YFS2 | PFIVTSEFTTAGLEHTSDQRNPSLMNLGAMVTMLLAKVLVI  |
| Q8QZY6 | MVGVMFTLGFAGCVGALRENICLLKFFCGAIVLIFLELA    |
| Q8IUI4 | REFGYQLDVKSIDDEDVDENEDDVGNSSGRKHRSSESP     |
| P07451 | DPSLQPWSVSYDGGSAKTILNNGKTCRVFDDTYDRSMLRG   |
| Q96BT1 | YSPKKRPHFPALKKKKRGMENILRKSIDLTVGKLMQVDDLI  |
| Q3U1C6 | LSSICLETDSPALGPEKLRNEPCNISIAAEFIAQVKGISV   |
| Q9NZ43 | QPVSEKQLAAELDLVLRHQNLQEKLAEEMLGLARSLKNT    |
| Q91WN2 | LLEQSRHSWINTTALITGCTNAAGLVVVGNFQVDHAKSLHY  |
| Q15056 | SQKELPTEPPYTAYVGNLFPNTVQGDIDAIFKDLIRSIVRL  |
| Q00188 | TPLCIDTDFVNATFEGYKALNVRRLNIMAGDEINSRNFDTL  |
| Q4JM65 | VPVKKQKIRTVFSQTQLCVLNDRFQRQKYLSQLQMQELSNI  |
| Q8R1Q0 | EHINRALGDVVKEVKKSEVENGPSSVVTRILKSQYAAMFRR  |

|        |                                            |
|--------|--------------------------------------------|
| P56965 | DMKKEALEKLQLNIVEMKDENATLDGGDVLFTGREFFVGLS  |
| Q7M729 | FKWSYNNSETSRILIDGIVKNDKSDPKVRVKDDDRITLEGS  |
| P09920 | LSGISPALAPTLDLLQLDVANFATTIWQQMENLGVAPTVPQ  |
| Q7L4S7 | WTEPGAPGGTEDRPSGGGKANRAHPKQRPPFYEHKNTWSA   |
| Q9CQG3 | HRGGVAPGFQVVHLNAVTVDNRLDNLQLVWPWGWRPKAEETS |
| Q17QJ5 | AGVLAFVFKDWIKDQLYFFINNNIRAYRDDIDLQNLIDFTQ  |
| Q8CIL4 | VLERERAIMLGAKPPKNYVNYKVLQKQIKEKKIAVEEEKR   |
| Q2TA42 | AREEEERAKREELERILEENNRKIAEAQAKLAEEQLRIVEE  |
| Q9ULW5 | KKTPKSKGASTFAASTLPTANGARPARSGTALSGPDAPPNG  |
| Q0P5E2 | FISGILAAALSAMISLEIPQVNVMTKMDLLSKKAKKEIEKFL |
| Q96A56 | EATRGTDELHSPSSPRVEAQNEMGQHIHCYVAALAAHTFL   |
| Q6P5X7 | SKSWLHGSIFGDINSSPEDNWLKGTTRRLDTHCNGNADDL   |
| Q3T033 | PDLVFRADQSRGPRQLLTYNPTGAVLRFVRLCTAPAKYTV   |
| Q96GY3 | SNTYVIKLFDRSVDLAQFSENTPLYPICRAWMRNSPSVRER  |
| Q14593 | SPQAGSSLKHSHTLTNRQRGNEVSALPATLDSLSIHQLAAQ  |
| P51809 | TEQILAKIPSENNKLYSHGNLYLFHYICQDRIVYLCITDDD  |
| P70661 | ELALSQRRSRKKANDREERNMHNLNSALDALRGVLPFTP    |
| Q99N07 | WKQSSSAFSGNVIFLSQNSKNKSSVSSELCNPTYENILTS   |
| B6A8R8 | PSKYFILKKEGFALNSVKPYNLTEETADFHFTDLRQNDGGH  |
| P57784 | NEIRKLDGFPLLRRLKTLVNNNRICRIGEGLDQALPCLTE   |
| Q28030 | QKNDVCRPGRYEQPDNGVLNYPKRAQFNRTQLGDCSGIG    |
| P22794 | HIVALTSKSEQELYTPSVVSNPSTVQSIENTSKSHGEIFK   |
| P08861 | MVCAGGDIRSGCNGDGGPLNCPTEDGGQVHVGVTSFVSAF   |
| Q9R0X0 | EYPLSCFALFENGPCLIADTNFDVLMVKLKGFFQSAKASKI  |
| Q6PIF2 | SLDSSIDILQKRAQELIENINKSRQKDHALMTNFRNSLKTK  |
| Q32L52 | GQIQEAIALINSLHPELDTNRYLYFHLQQQHLELIRQRE    |
| Q9NYN1 | APLTARHGLASCTFNLTSTINLKEMPTVAQAKLVTVKSSRA  |
| Q9Y5N5 | PLVPDLSPKGLFYLVTIKENNPEEILKIMKTGLQGTAL     |
| Q3T0G5 | TKPADMVIEAYSHGQRTFGENYVQELLEKASNPQILSSCPE  |
| Q693B1 | ARRGPHHYELSSVQVDTFRANLFTDSECLGALRARFGVAS   |
| Q00724 | HWIIDTDYDTFALQYSCRLQNLGDGCADSYSFVFSRDPNGL  |
| Q8BHH8 | GLFRGTSAQELNEGLQDLKDNFEVLGILDNSSQKSLHLVVI  |
| Q9UPY8 | GRLSNVAPPICILRKNPPSARNGGHETDAQILELNQQLVDLK |
| Q75431 | TILTTQLTNDLSEKVKYNSNLLAFCCRIEQHYFEDRGKGR   |
| Q9D676 | LPATKTEQILINKTYAACPKNWIWGNKCFYFSEYTSNWF    |
| Q9CQ07 | RLTTNGLPVELNQLKNIRTVNLGLNHLDSVPTTLGALKELH  |
| Q9X2V8 | KKGMAWIFISNKKENRLYSLNEEHLIRKEISNLSIIFHLNI  |
| P70379 | QESGRAWFLGLNKEGQVMKGNRVKTKPAAHFLPKPLEVAM   |
| Q60652 | NKSIDCSPGEBELLESLNREQNRWYSETKTDLDSSQDTGTGV |
| P49716 | SAGKRGPDGRSPEYRQRRERNNIAVRKSRDKAKRRNQEMQQ  |
| P78345 | PRVPSLSVPWLQDRIEDSGENLETEPLESQDRELDTSFED   |



|        |                                            |
|--------|--------------------------------------------|
| Q7TSN2 | KTSSSEEVNRGRVTIRDHPDNLTFTVTYTESLTLEDADTYMC |
| P47753 | EDGNVQLVSHKDVQDSVTVSNEVQTTKEFIKIIESAENEYQ  |
| Q9ESN5 | NVLNSDVENQVVTLTESRIFNELTTKIRGIKEFKELLLTL   |
| P07318 | IKMDAQEHKLCLEFEGANFKGNTMEIQEDDVPSLWVYGFCDR |
| P0CI32 | YQRAVDQILTRSGKLCDFIGNAGIWDHNASLVNTPAETLET  |
| P62258 | LKLICCDILDVLDKHLIPAANTGESKVFYKMKGDYHRYLA   |
| Q15102 | VQLMHQCEIWRELFSPHALNFGIGGDGTQHVLWRENGEL    |
| A5PKI3 | WVFCGGKGIKTKSPFEQHINKNKDNTKYEKGWPEVMEGCI   |
| Q8BJ83 | ECSNSTTCMTVACPRQRYFANCTVRDHIHCLGNRTFPKLLY  |
| Q6QUN5 | VGKYFLEDIPSEGMLQIQMANLQVEDSGLYRCVILGSPDPI  |
| Q8BH50 | LSPSSSGHLADSDTLSSVEENEPSQAETVEGDTSGVSGAT   |
| Q28145 | KFKKMFVGWDFHSNIKTVKLNLLITGKIVDHGNGTFSVYFR  |
| F7BWT7 | NTTDVVNTMCGYKTTDKERLNAQNIHVRGCTNAVLIWFMD   |
| Q96NF6 | RVWWRLPVI PATREAEDNRLNPEGRGCPEPRSRHCTPAWTT |
| P54130 | ELYGSEKLTQECVFREQFEENWYNTYSSNLYKHVDTRGRYY  |
| Q8WXB1 | HLCNSHSVILLACRIRYERDNNFLAMLERQFTVRKVHYDPE  |
| Q9R1P3 | ANFTRRNADCLRSRTPYHVNLLLAGYDEHEGPALYYMDYL   |
| P25402 | RVKLIYRPIALKNGRDEAENNIKLINSGTDSCELENTTPYYF |
| Q62283 | SPYFLDHGIPPSCCMNETDCNPLDLHNLTVAAATKVNQKGCY |
| Q148G4 | LPMFLHCRNSHAFLDIMRRNRDRCVGGVVHSFDGTKEAAA   |
| Q9JJU9 | LLSLRPLHIDGPDHKLHLFENPAFSGRMEIVDDDVPSLWA   |
| O55126 | DSWLKSLFVRKVDPRKDAHSNLLAKKETSSLYKQLQFHNVKP |
| Q3SWZ3 | AQLKAIEPQKEEADENYSVNTMRKTOHGVLSSQQFVELIN   |
| Q64105 | ATLGDVSKGFLNVNDLAEVNNYWALNLTSMCLTSGTLNAF   |
| Q8N402 | YDICNEDAVDISDEDTVDISNEASVHDISNEAAVCDISNDA  |
| Q1JQA8 | CIFLKKTLNIPVISEKPLLFNGLNSVDSPENETVDSFSHEE  |
| P20774 | LYARFNKIKKLTAKDFADIPNLRRLDFTGNLIEDIEDGTFS  |
| Q15404 | EILPPDIGKLTQILSLRDNDLISLPKEIGELTQLKELHI    |
| P01131 | AIFEDKVFWTDVINEAIFSANRLTGSDISLMAENLLSPEDI  |
| Q9DCC7 | LDRGLQVHVAVDACSSQSEMNRVALARMQQSGVFLSTSEV   |
| P01731 | KITWDEKLNSSKLFAMRDTNNKYVLTLNKFSKENEYGYFC   |
| Q96DN0 | HYNITGNTICLFRLDVNEQLNLEDEDEIESIDATKLSRFIEI |
| P49891 | PRIVKTHLPPKLLPASFEWKNCKMIYLCRNAKDVAVSYYYF  |
| Q2HJH7 | GRHPIGVLLNATELQKNGMNMSSFFQQASWRRRMGAAAV    |
| Q28203 | VIPVTMGVLFVLLVSACIRNITKKRQAKALHPTAERQDPV   |
| Q3MHR0 | ALSCWLPLRASFPQGPIGGVNRDISILQCHGDLPLVPLMF   |
| P15692 | SERRKHLEFVQDPQTCKCSCKNTDSRCKARQLELNERTCRCD |
| Q96E11 | VPIPVQVTRHREMLVKLAKQNTNKAKDSLKRVRTNSMNKIK  |
| Q17QJ5 | LGIAFLGIGLWAWNEKGVLSNISSITDLGGFDPVWFLVVG   |
| Q3UFF7 | HLAYRSHPDVAGVFLSGFLNKASVYQDLQGGGRMLPELF    |
| Q8N2U9 | RRTQNADGFSTYVCLVLLVANILRILFWFGRRFESPLLWQS  |

|        |                                             |
|--------|---------------------------------------------|
| Q60660 | EMLRNKSSECKALNDSLHYLNREQNRCLRKTIVLDCSQNK    |
| P70190 | RCVNLHIEVSKDLKESLEVVNQAQLALS FARLVEEQENKFQ  |
| Q96M98 | TFFYEFFARQGIHDMLEHGKNKILPVLPLI IPIKNALNLR   |
| Q14249 | ATNADYRGSFDRGHLAAAANHRWSQKAMDDTFYLSNVAPO    |
| Q1RMJ7 | GYCFVEFADLATAEKCLHKINGKPLPGATPAKRFKLNYATY   |
| Q80WY3 | GATAARLLKPELQVCVFCRNNKEAVALYTHILKGPDGRVL    |
| Q9CQ06 | SSPFYRYGMSRPGSIADKRKNPPWSRRRPVVVEPISEDEWH   |
| Q9BY08 | RSPNLNTSNWLYCWLWYLF FFGVWVLI PGLLLWQSWLELKK |
| Q58DV7 | MRSLFTHDSRYVESFRRFLSNSTEHQCMQEFMDKKLPGIIA   |
| Q86WA6 | PRAGPAAAFGTSVTSAKVAVNGVQLHYQQTGEGDHAVLLLP   |
| Q2NL23 | ASIPFLEDFCIEEDEEEAGDNQAWEEP LNWN TGTRNLTPPR |
| Q2KJ84 | LLRAFEARDRNIQESNFDRVNFWSMVNLVVMVVVSAIQVYM   |
| Q96BI3 | QMAYVSGLSFGIISGVFSVINILADALGPGVVGIIHGDSPIY  |
| Q6P587 | LEEGDI ILTGTPKGVGPKENDEIEAGIHGLVSMTFKVEKP   |
| Q8NH89 | GSINASVHTGFTFSLSFCKSNKINHFFCDGLPILALSCSNI   |
| O35980 | IANRLRWTKKMTKTPEETRKNLEEWLPRVLWSEVNGLLVGF   |
| P24668 | HIFNGSNWIMLIYKGGDEYDNHCGKEQRRAVVMISCNRHTL   |
| Q99714 | LATAERLVGGASAVLLDLPNSGGEAQAKKLGNNCVFAPAD    |
| Q9HA38 | RKEGNEFKMMPNRRNMYTVQNSAGPYFNPRSRQRI PRDLA   |
| Q2KJ37 | ETITTHYLFFLGLYRALYLVNWIWRFYEGFFDLIAVVAGV    |
| Q9Y5K2 | DQEPGSMVEASLSVRHPEYNRPLANDMLIKLDESSES       |
| A6QQC0 | IRESGAKHKGLTEIPSLSEENEVDDETEVNVSKKKGDGDIK   |
| Q96HS1 | PAEPPAWAGGARPGPGVWDPNWDREPLSLINVRKRNVESG    |
| Q9JL95 | RCYRGNLASVHSYSFNYQIQNLARKINQSIWIGGILRGWF    |
| P19437 | QTIKMKEEIIELSGVSSQPKNEEEIEIIPVQEEEEEEABIN   |
| Q9TQE0 | FECHFFNGTERVRYLHRGIYNQEENVRFDSDVGEYRAVTEL   |
| P0C8J7 | GICKINVATELKNAFSQALKNYLTAHPEATDPRDYLQSAKS   |
| P15948 | GIDAAPPVQSRILGGFKCEKNSQPWQVAVVYLD EYLCGGVL  |
| Q9BP22 | RVLSLKILSDRVASSHISDANLANTIIGKAVEHMFEGEHGS   |
| P41272 | GTSFSPDYHTRPHCESCRHCNSGFLIRNCTVTANAECSCSK   |
| Q3T0A9 | CMISHGRKVPWVCPDFCCGNCNDQYCCSDVLKQVMWIEED    |
| Q3MHR2 | TRIKKISIEGNIAGKSTFVNILKQVCEDEWVVEPVARWC     |
| Q17QJ0 | VLENPSPFHSPFRFEISFECNEALADDLEWKIIVGSAESE    |
| Q02739 | AFYPRYTLPSMVKCHAEPNPTVDCFIAKPSEKNIFIVFMV    |
| Q9NQT4 | SITVVLQVVS DAGSLLACCLNAACMALVDAGVPMRALFCGV  |
| Q9UH92 | KGSVVS RANSIGSTSASSVPNTDDESDSYHQEAYKESYKDR  |
| P46412 | LFKGDVNGEKEQKIFYTFLKNSCPPTAELLGSPGRLFWPEM   |
| Q00535 | MTKLPDYKPYMPYPATTSLVNVVPKLNATGRDLLQNLKCN    |
| P17322 | WNFCQAGKELRDQDSMEKAWNNQKRGKDCSKLGEKCLHQQL   |
| P10948 | GVKDASDQNFDMFKLLIIGNSSVGKTSFLFRYADDTFTPA    |
| Q9QZE7 | TPFEVSQFLRQVYDGFSGFIGNTGPYEVSKKLYTLKQSLAKV  |

|        |                                             |
|--------|---------------------------------------------|
| P43276 | VSLPALKKALAAGGYDVEKNNSRIKLGKLSLVSKGTLVQTK   |
| Q9Y696 | KGVVFSVTTVDLKRKPADLQNLAPGTHPPFITFNSEVKTDV   |
| O60573 | EEICGAVVSVRFQEDIISIWNK TASDQATTARIRDTLRRVL  |
| Q9H063 | NCSLFSAVREDFKDLKPQLWNAVDEEICLAECDIYSYNPDL   |
| Q3T165 | CRSRPRNVPVITGSKDLQNVNITLRLIFRPVASQLPRIFTS   |
| Q6GV28 | VCGVLSLLECKLSTSSCTCLNIHKSDNECKESENSIEDISL   |
| Q9H3L0 | MTVWSEEVEIEREVLLEKFINGAKEICYALRAEGYWADFID   |
| P05631 | TISSAESMSIYDDIDADVLRNYQEYSLANIYYSLKESTTS    |
| P63104 | TELRDICNDVLSLLEKFLIPNASQAESKVLYLKMKGDYRY    |
| Q17QI5 | YAMNSEFSSVLAQLKHHSENKGLDKVMETQAQVDELKGM     |
| P10966 | TVLHGNSVLQQTPAYIKVQTNKVMVLSCEAKISLSNMRIYW   |
| A6NJ46 | RTRNCWADTGQDWRGGRQCSNTPDPLSDSIHKKKHTRPTFT   |
| Q9Z1Q5 | DEGISQRKFLDGNELTLADCNLLPKLHVQVVCKKYRGFTI    |
| Q3URK1 | GVSSQDGERGSAPANETRSENASQKPRGDADVQNSPSSVDY   |
| Q8TC22 | QKKFCFSIQQGLNADYVKGENLEAVVCEEPQVKYSTLHTQS   |
| Q9Y3B9 | AMAKVLNKKTPESKPTILVKNKLEKEKEKLERLEKIKQ      |
| Q64267 | ALEVWGSQEALEDAKEVRQENREKMKQKKFDKVKELRRAI    |
| Q9CQI4 | CHEQTYEEFLSTFTTHLSKEDNVAKWGAHGTDSSENI FSTVK |
| P26884 | GDVVHCWYTGTLQDGTVFDTNIQTSKKKKNAKPLSFKVGI    |
| Q149F5 | GYIWTEDSFFCDPDGHITLNPSTSVMYKENLVRIFRKKK     |
| A2AQ14 | MLCYLLKTNAIVNTSEMDFHNVPLPEKIAELKEKIMLMHTR   |
| O14753 | SGDLFTCRVCQKAFTYQRMNLRHMKCHNDVKKRHLCTYCGKG  |
| Q8CBW7 | YAPDPVLVRGAGHITVFLSNKFDTEFPVSVLTGKVAPEEFK   |
| Q9BQY4 | AGVPGHLWEGDLEGTSGSDGNVEDSDQSEKEPGQQYSRPQG   |
| P34927 | QNFLQRHMGPLNTWIGLTDQNGPWKWDGTDYETGFGQNRFP   |
| P08074 | QVSMVARDMINRGVPGSIVNVSSMVAHVTFPNLITYSSTK    |
| Q8BGJ9 | KYGEIEEMNVCNLDHVLGNVYVKFRREEDAERAVAEINN     |
| Q8VCH9 | DLPPETVLLYLDSNQITSIPNEIFKDLHLQRLVNLNSKNGIE  |
| P35509 | LGHNTRGTGSSSSGVLVGPVNFVRGKKIGCGNFGELRLGKN   |
| Q9H115 | ATSFVDAGNAYKKADPQEA INCLNAAIDIYTD MGRFTIAAK |
| Q92813 | LLERFSLPPQCRVVADRMN NANIAYGVAFERVCIVQRQKI   |
| Q7YRD0 | LSRAIGRIAGGGKTKFTIENVTRTRIVLADVKVHILGSFQ    |
| Q9GZU0 | KEKKKKSALFEVSEVIPVMTN NYEENILKGVDRDSSYSLESS |
| Q6IPR3 | VPLSHKGKLMVTEEYIDFLLNVANQKMEENKKRIERFYNCL   |
| P04768 | KKKINAVRNGVNALMSTMLQNGDEEKNPAWFLQSDNEDAR    |
| Q2PT27 | RANLKDAIFKSCDLSMADFRNINALGIEIRHCRAQGSDFRG   |
| P32243 | LNQSPASLSTQGYGASSLGFNSTTDCLDYKDTASWKLNFN    |
| O89104 | SAGATPSMGLANLSVLFGINFFLWAGNCWFVKETPWHGQ     |
| P09661 | DPLASLKS LTYLSILRNPVTNKKHYRLVIYKVPQVRVLD F  |
| Q6QRN8 | VEVTHPNSMPAVNIQYEVIGNYSSERMADNACVLFVAVSVL   |
| Q9D413 | AGRRLSASSIAPALSSSVAENGLLGQPWYSGNCDRQSVER    |

|        |                                            |
|--------|--------------------------------------------|
| Q9BXY4 | MEYIGSQNASRGRRRQRRMHPNVSQGCQGCATCSQDYNGCLS |
| P24539 | RLYRVYKEVKNRLDYHISVQNMRRKEQEHMINWVEKHVVQ   |
| Q14002 | NIDVVPFNVVAGKEVLLVVHNESQNLGYGNWYKGERVHANY  |
| P59544 | LIMVFLVLFNGFANGFIALVNFIDWVKRKKISSADQILTAL  |
| P63073 | QANLRLISKFDTVEDFWALYNHIQLSSNMPGCDYSLFKDG   |
| Q9D8Z6 | SEELDRALRKVVGEFKDALRNSGGDGLGQMSLEFYQKKKSR  |
| Q91X58 | ERSGCRQREMMKLTCDRCGRNFCIKHRHPLDHECSGEGHQT  |
| Q86XI6 | SLPEKIQSYERMEFAVYYECNGQTYWDSNRGKNYRIIRAEL  |
| Q5T0L3 | SFAQALPPQYQSIIVRQGIQNTALSPDCSLGDTQHGEKLR   |
| P54920 | YSAKDYFFKAAALCHFCIDMLNAKLAVQKYEELFPAFSDSRE |
| O08992 | DGNLYPKLYPELSQYMGSLNEAECESMPMVGAPAQGQL     |
| Q9CXK4 | QRTRSVDNIQFLPFLTTDVNLSWLSYGVKGDGTLIIVNS    |
| O88796 | ANLGLLFLGSENDGKAAVSTNCRAVFLHGETRKTAFGIIST  |
| Q91ZW8 | DWTFNGSCYFFSKSQRNWHNSTTACQELGAQLVIEETDEE   |
| Q9WVS0 | QGSYYFCSLSIFDPPPFQERNLSGGYLHIYESQLCCQLKLW  |
| Q3TTJ4 | FCTKKVNLIHQRQDLRAKSNRPKRLQLRWIAETSEVDAFN   |
| Q0IIL5 | RQHVDQRRQGLEDFLRKVLQNALLLSDSSLHLFLQSHLNSE  |
| P57076 | DPIRMEFENKEDLSGTQAGLNVIKAEAEQLWAAKELRRTK   |
| Q01730 | ISLPKEIGELTQLKELHIQGNRLTVLPPELGNLDTGQKQV   |
| P50236 | ELDLVLKYSSFQAMKENNMSNYSLIKEDRVNGLKLMRKGT   |
| Q9Y3B8 | ASHRALDDISESIKELQFYRNIFKKKIDEKKRKIIENGEN   |
| Q5JBG6 | DSDRIYFSKYLNVEVINVEKNCWPLNTLLRFSYFLKVIDKL  |
| O14925 | ELAFFTIGGCCMTGAAGAMNGLRLGLKETQNMASKPRNV    |
| P00760 | QFISASKSIVHPSYNSNTLNNDIMLIKLSAASLNSRVASI   |
| O69395 | SETQKQLLNQVPEIKPADLVNYPNIAEKHVNGTMTLAEISA  |
| Q2KJD9 | LRKNNHQITVHLVYHHASMLNIWWFVMNWVPCGHSYFGATL  |
| Q9D7U6 | DSFLALPAELQVSRVLMSLCNGLGLGLLASGCCGLDCLRLG  |
| P62753 | RPRRTGERKRKSVRGCIVDANLSVLNLVIVKKGEKDIPLGT  |
| O08543 | VRPTNSCMKTIQVHDRVFDVNDKVENSLPADDTVHESAEP   |
| Q6IR41 | FDMATGSFVAPLRGLYFFSLNVHWSWNYKETYVHIVHNEQAV |
| A4FV08 | KKLIEYYKNGDLSFKYVKTFFNMDEYVGLPRDHPESYHSFMW |
| P16035 | CYISSPDECLWMDWVTEKNINGHQAKFFACIKRSDGSCAWY  |
| Q07699 | AEMIYCYKIIAAATETAQENASEYLATSESKENCTGVQV    |
| Q96BS2 | RAFFDNRNLRKGPSGLADEINFEDFLTIMSYFRPIDTTMDE  |
| Q96CJ1 | RVEGSSKIQYRKEQQQQMNSARTPNLVKHSPEDEKMSPA    |
| P16562 | SNMLKMEWSREVTTNAQRWANKCTLQHSDPEDRKTSTRCGE  |
| P55258 | IEEHASADVEKMILGNKCDVNDKRVSKERGEKLALDYGIK   |
| Q9NX40 | PDPNLEESPKRKNITYEELRNKNRESYEVSLTQKTDPSVRP  |
| Q8BK84 | RYGLQKAGFTHVLNAAHGRWNVDTGPDYRDDMAIEYHGVEA  |
| Q9UFF9 | NFKFNLTEDMYSQDSIDLANSGLQFQKHEEEDIDLHFAE    |
| Q8N488 | RPRLKNVDRSTAQQQLAVTVGNVTVIITDFKEKTRSSSTSS  |

|        |                                             |
|--------|---------------------------------------------|
| Q5E9H1 | EESYGYLRRESHQIGDAYSNSDKSLTELESKFKQGQEQDS    |
| P56371 | KKFKDDSNHTIGVEFGSKIINVGGKYVKLQIWDTAGQERFR   |
| Q6ZUI0 | DPMPRQISRQSSVTESTLYPNPYHQFYISRKYFATRPGAIE   |
| O18879 | AQIKERTTNRYPFAFEKVLKNHGQDYLVGNKLSKADHIVE    |
| Q5E9Z5 | TEKTVFTIFMISASVICMLLNVAELCYLLLVCFRRSKRAQ    |
| Q58D49 | RRVVPLVQTGETDANVVKFLNRLSDYLFTLARYTAMKEGNP   |
| Q7TST3 | LVYVEAFSQHAITGRALLRLNADKLQRMGLTQEAQRQEVLO   |
| Q9Y5N6 | AASWMCPLDRAYLIKLSGLNKETYQSCLSKFECLLGLNSN    |
| Q9D7K5 | SLAGCPRISERGLACLHHLQNLRLDISDLPAVSHPGLTQI    |
| Q9NQ48 | LNEGTAELLNKEILRLQEEENEKLSRLKTIETIQATNALDE   |
| Q32LJ6 | FADNQIPLLVIGTKLDQIHENKRHEVLRTAFLAEDFNAEE    |
| Q3UG98 | AEKWQAQPRPPEESCMVGDVNLFLTDLEDPTLGEIEVMIAE   |
| P01895 | ERDRAYLEGECEVWLRRLYKNGNATLLRTPPKAHVTHHRR    |
| P0C002 | GLPVKDLGPASLAAELHAIGNADYVRTHAPGDLRSAITFS    |
| Q9NYW5 | DSSSVWFVTLNLNLYCVKITNFQHSVFLLLKRNISPFI PRL  |
| P09056 | PITPVNATCAIRHPCHGNLMNQIKNQLAQLNGSANALFISY   |
| Q9DAZ2 | SETAKLTFEFNNQYAQGKRYNDRIPGTCHTEFFDTPVNKEQ   |
| Q9BWV2 | ALTSIIYASYAALIYLAVCVNAVLKVKNIHQEESIRQNR     |
| Q8N6F8 | AIPELHVTKPGLVCLTTRTNSNLQYKEALEATLDRLEQA     |
| Q96CS7 | YDDQTRQNIEDKVHMPMDCINIRTGQECRDTQPPDGKSKDC   |
| Q9JKY0 | AAPVPTALAQVDREKIYQWINESSPETRENALLELSKKRE    |
| Q9NQM4 | SKKDSSTGCCSELVAKIKLPNTNPSDIQIDIQETILDLRTP   |
| P13598 | FEVHVRPKKLAVEPKGSLEVNCSTTCNQEVEGGLETSLDKI   |
| P21266 | DGKNKITQSNAILRYIARKHNMCGETEEEEKIRVDI IENQVM |
| Q5QR91 | RVTVHLVYSERRPKVKYIMKNLPVITDLPRNSTASPRCHLR   |
| P01909 | VFSKSPVTLGQFNILICLVDNIFPPVVNITWLSNGHSVTEG   |
| P38117 | KIRVKPDRGTGVVTDGVKHSMPFCEIAVEEAVRLKEKKLVK   |
| Q8N4C7 | ITKAQLSEIEQRHKELVNLENQIKDLRDLFIQISLLVEEQG   |
| Q8VEE0 | MLDSGADYLHLVDVMDGHFVFNITFGHPVVESLRKQLGQDPF  |
| Q9DCQ2 | GPRTVLYEGPVRGLCPLAPRNSNTMAAALAAPSLGFDRVI    |
| P28072 | DTQAVADAVTYQLGFHSIELNEPPLVHTAASLFKEMCYR     |
| P17981 | YEGCVDEMEEKAPQLLQEDFNMEELKLEWEKAEIKWKEIK    |
| Q32NC0 | CNRTVKHHGKRSRFSVSTLKSNPATPTSKLSLKTERRTANP   |
| Q9NYW5 | TCLYITLSQASPFPELVTRNNTSFNISEGILSLVSVLVS     |
| Q9NP55 | SLTNALSNGLLSGLLGI LENLPLLDILKPGGGTSGGLLGG   |
| P04370 | RTTHYGSLPQKSQHGRQTQDENPVVHFFKNIVTPRTPPPSQG  |
| Q9JMG7 | LFYKEYKDKFGKSNKRKGFNEGLWEIENNPVKFTGYQTI     |
| Q9CWP9 | PGPSTGAEQYSRPIWELDINMLGPPGSPPLQPLPPSPSRN    |
| Q9MZ13 | GWLAGYQMSFDTAKSKLSQNNFALGYKAADFQLHTHVNDGT   |
| Q14B24 | QTFSIAAAASHPDFPATQANDICLLRLNGSAVLGPAVRL     |
| Q3UUI3 | DQFMKKCEDGSKRMPSHRQNPTRAIQEFQTLFVDSKFKKE    |

|        |                                                                                |
|--------|--------------------------------------------------------------------------------|
| P43080 | KNLSPSASQYVEQMFETFDFNKDGYIDFMEYVAALSVLKLG                                      |
| Q8IZ81 | ATHVVQSEVDKYVDDIMKEKNINPEKDA SFKICMKMCLLQI                                     |
| P31783 | VGTCGVLLLSLVITGICYRRNRVVCKCPRPVVRQGGKPNL                                       |
| P57729 | AKENINIDEASRCLVKHILANECCLMESIEPDVVKPHLTST                                      |
| Q15661 | QFYTAQIGADIALLELEEPVNVSSHVHTVTLPPASETFPPG                                      |
| Q80ZQ5 | FGGCGLHFPTLADLIEHIEDNHIDTDPVLEKQELQQPTYV                                       |
| Q2HJF2 | EDPALWPLLHFRSLTELKKNFLLSPALRSL SICWHSSRVQ                                      |
| P0DMB1 | KPSISGAPHLNSYQSLELPQNQQDSGTEELMIVLEQGTVEV                                      |
| Q2YDK0 | LVEKPFPAKDERLLCSECYSNECSSKCFHCKKTI MPGSRKM                                     |
| P14436 | ANEAPQATVFPKSPVLLGQPNTLICFVDNIFPPVINITWLR                                      |
| Q5HZI9 | TPFERVQTLQDHHKHKFTNTYQAFRALRCHGIAEYYRGM                                        |
| Q3T0D3 | YQPASPPRDACVYN SCYCEENIWKLC EYIKNHDQYPLEECY                                    |
| Q3ZC48 | LCVATIYVRYKQVHALNPEENRI IRLNKAGLVGLL SCLGL                                     |
| Q3LI83 | TNVS P S P S C S P S T Q T N G Y V C N C H I P T R N A S K A C Q T L R N G S N |
| Q8VE10 | KRVSGLEPATVDWAFDLTKTNMQTMYEQSEWGWKDREKREE                                      |
| Q9D9S2 | LSFFAGCLLFYAI IVYHHKLNKGQYVYFVNYKTKWIAFTVY                                     |
| Q5M8M2 | PRGPAAALYRGP GP KY KLPTNTGYKLHDP SRPAPAFSFGS                                   |
| P06717 | FGVIDERLHRNREYRDRYRN LN IAPAEDGYRLAGFPDPHQ                                     |
| Q9NZH5 | KATRKALGTVNRATEKSVKTN GPRKQKQPSFS AKMTEKTV                                     |
| Q2QD12 | YTFHLEATENPGLTIKDI RENG MKVGLAIKPGTSVEYLAPW                                    |
| O95297 | NPPDIVVQPGHIRLYVVEKENLPVFPVVVVV GIVTAVVLGL                                     |
| Q8TAF8 | GDSVNTPQAGYFGLFSYCVGNVLSSELICKGGPLDFSSIPS                                      |
| Q9BXJ1 | FFSLNVHTWNQKETYLHIMKNEEEV VILFAQVGD RSIMQSQ                                    |
| Q17QL1 | RLVILDNYDLASEWAAKY ICNRI IQFRPQDRYFTLGLPTG                                     |
| A1XBS5 | ELQRAAMDASRTSRHLEETINNF ERQMKDKIKTIFSEFITI                                     |
| Q9BQE9 | NGFPDASANSLLLEFQDENSNQSSVSDVYQLKVDSS TNS                                       |
| Q9Y680 | SCHRTTLHV LKCMYLLV LNNTCAEGKIPPDATLIFEI ELY                                    |
| Q8C767 | VCLENCVLKDKA IAGTVKVQNLAF EKVVKIRMTFDTWKSFT                                    |
| P06730 | SKFDTVEDFWALYNHIQLSSNLMPGCDYSLFKDGI EPMWED                                     |
| P00766 | PWQVSLQDKTG FHF CGGSLINENWVVTAAHCGVTTSDVVVA                                    |
| Q8K5B8 | NPGFVGPLVNIHTGDTFYFPNFRASGAQLPGLPSLSYPRRD                                      |
| Q3T0L1 | HLEKVDIKTSV LMDNMKQILNLNKLIMKSQQETWDL EEKLL                                    |
| Q2WG77 | EEEEEEEDDEEEDEDEDKDVNENEPEVCMGVSEATHKATA                                       |
| Q9D7I8 | NGFQTV EENS DVSLVCNVKSNPQAQMMWYKNN SALVLEKGR                                   |
| P0C6A0 | GIRYKKGTRCSSCWL VPRKNVQPKRLCGRGVS LDPIQEG                                      |
| Q3UFY0 | ELLRLQGGRPKAHKQLVAGNSTRTRSPQPV CVADKHRPL                                       |
| A2A8T7 | TEPEDQNSDSLWELDLSEGRNFVVQDSSPRGEASDLLQHVL                                      |
| P19652 | WVLTVLSLLPLEAQIPLCANLVPV PITNATLDRITGKWFY                                      |
| Q8BJF9 | QTMQNFQKENMKMEMTEEMINDTLDDIFDGS DDEESQDIV                                      |
| P01881 | FPESWDSQSSKRVPTLQAKNHSTEATKAITTKKDI EGAMA                                      |
| Q9D7I5 | SNPNCVVIADAGEAFSYQNMNRAFQVLMEL ENPVLISLGKG                                     |

|        |                                             |
|--------|---------------------------------------------|
| A2A8T7 | QWVEVMRAATFTYSPLLYWINKRRYHGMNVAINTGPPPAVT   |
| P29020 | VIITALYLRAKFSRSAETAANLQDPNQLYNELNLGRREED    |
| A6NMD0 | VIEVYPDTEVNDYLLWSIFNFVYLNFCCLGFIALAYSLKV    |
| Q9NUL5 | NRREPHVPGTSCAHPKSRKQNLHPKVLHPSNPHISSGSTVA   |
| Q9H4A6 | WIELLSGETWNPLKLHYQLRNVRELRKLNVEKGVLTTEKQ    |
| Q9ULR0 | AEKWRRQIIGEISKKVAQIQNAGLGEFRIRDNLNDEINKLLR  |
| Q1LZE2 | FPQLPVVTHTRQVPSKPDVHNTITSWVSPQFDTTAESEWFG   |
| Q9Y2W7 | LIYAQFFPQGDATTYAHFLFNADFADGNGAIFHEDFVVGLS   |
| Q8CEG5 | SFLTEVTDVYEMEGLLNLLNDFHSGRLQAFGKCECFEQLE    |
| P04230 | RWFRNGKEEKTGIVSTGLVRNGDWTFTQTLVMLETVPQSGEV  |
| P07360 | QKPQRPRRPASPISTIQPKANFDAQQFAGTWLLVAVGSACR   |
| Q6P1N9 | FMITGGNLQDSKDALHLAQTNGMFFSTVGCHPTRCGEFEN    |
| P01193 | IDVWSWCLLESSQCQDLTTESNLLACIRACKLDLSLETVPVFP |
| Q497H0 | KCFADFQKKQPDSTPSTSNQSDLFSEETSDNNNTSVT       |
| Q3T116 | PVDRLTISYCRSSGPGQNVNKNVSKAEVRFHLASADWIAE    |
| P51150 | EFLIQASPRDPENFFVVLGNKIDLENRQVATKRAQAWCYS    |
| Q32PI9 | KEIFVANGTQGKLTCKFKSTNTTGTLSVSWSFQPEGDTT     |
| Q8BIL2 | MRGLMLVWEEFFDELKQTKRNVKVEKMASKLFEMTGERRL    |
| Q96Q80 | VWRLVTNLFVFGPLGFSFFFNMLFVFRYCRMLEEGSFRGRT   |
| Q91YP1 | QLFPPEGPEKRPILGLDVGCNSGDLVALYKHFLSPRDGET    |
| Q96PY0 | RRGCGDSGSSGMAQRAQAGSNQSRGKCRDGRCPPRSSPGA    |
| A6H773 | VRCSHQDLKSEDGRLIYTGNLARTVFGVKCFYSYSLISL     |
| P56915 | AKWRRQKRSSSESENAEKWNKTSSSKASPEKREEGKSDL     |
| Q3SZD7 | LSRIHARKLSEQRGGDKILLNACCPGWVRTDMGGPKASKSP   |
| P08505 | CMNDDALAENNLKLPETQRNDGCYQTYGYNQEICLLKISSG   |
| Q5T036 | LPPKQALASAARNLCRGAGCNQAVAGQLLPSTWLSLHAGL    |
| Q9EQF4 | LTPACRKHFIQAICFHECSPNLGPWIQPVVPNGQEEQRVWG   |
| Q9JJ69 | RRELQVLYRGFKNECPSGIVNEENFKQIYSQFFPQGDSSNY   |
| P28067 | FGPTFVSAVDGLSFQAFSYLNFTPEPSDIFSCIVTHEIDRY   |
| O60921 | NLSRALKTAQNARALKIKLTNKHFPCLTVSVLLESMSSSSR   |
| P28069 | LPLIMHSAAECLPVSNHATNMSTATGLHYSVPSCHYGNQ     |
| Q9D061 | LYLYARFKQVKGVCNCTPKPNFFDFEGKQKWEAWKALGDSS   |
| Q9QXV3 | SEAITQADKPNKRQRNRENRENASNNHDHDDITSGTP       |
| O88878 | GSNSPTSDSASVQRADAGLNCEGAAGSTSEKSRNVPAAL     |
| Q9D8P7 | TMKLSMTRTLLEKKEGEENIDGVEWLQMKDNDFSYRPNM     |
| O95475 | KRELAQATGLTPTQVGNWFKNRRQRDRAAAANKRLQQQVLS   |
| Q9TT89 | ASSVFATGAFPEQTSCAFASNPQRPGYGAGSGASFAASMGG   |
| Q8IYP2 | QTVNISVISKPCQRDAYKTYNITENMLCVGIVPGRRQPCKE   |
| O95843 | QGLNQKANKHIDQVYNTFDTNKDGVDVDFLEFIAAVNLIMQE  |
| O43247 | PPTAASRDSLGMDPQSRSLKNAGSRSSRENATSGEGAQP     |
| Q8R5M0 | EGSIINRIEAVCVGDSIEAINDHSIVGCRHYEVAKMLRELP   |

|        |                                              |
|--------|----------------------------------------------|
| Q9CQE6 | EFIRVGYVNNNEYTETELRENPPVKPDFSKLQRNILASNPR    |
| Q9BGI1 | KVGDAIP SVEVFEKEPGNKVNLAE LFKGKGVLFGLPGAFT   |
| Q9Y3Q3 | DSQTHYRLREAQDRARAEDLNSRVSYWSVGETIALFVVSFS    |
| Q9CYH2 | DLKTLKEKEPRTFKAKELWEKNGAVIMAVRRPGCFLCRAEAA   |
| Q9MZ06 | PEKTQTMATKDPQCEEEEDLKNQRKAAL EYCGETWGS LCNFF |
| Q8N3Z3 | RNLKRTFLLVDSVVG IQKTDNIAIEMCEE FALPYVIVLTKI  |
| Q9BRK0 | ITQARDKSYETMMRVGKRGLNLAANA AVTAAAKGVLSEKLR   |
| Q70IB2 | ISEDEVGGDRMLRAEVLLHSNKDYLRSDVMDRECNALMALK    |
| Q9CWJ3 | AVIKRWWSELSTSEI ISDGN IKILKQQLSGLWEQESH LTL  |
| Q61133 | ELYLDLLSQPSRAVYIFAKKNGIPFQTRTVDILKQHMSEQ     |
| Q1LZ75 | KLEQDFVSRVTECLT TVKSVNKTD SQTL LTTFGSLEQLIAA |
| Q91W61 | VYLAQRRGAGLRSLSLAVNANVGD TAVQELARNCPQLEHLD   |
| Q64310 | AIGFKTKLAALTLVVWLFAINVYFNAFWTIPVYKPMHDFLK    |
| P28845 | KFALDGGFFSSIRKEYSVSRVNV SITL CVLGLIDTETAMKAV |
| Q96B36 | SVPVWGFKEKRTEARSSDEENGPPSSPDLRIAASMRALVL     |
| Q3T0Z4 | ITNTANNRVRVNLHFNSIENQHRI IHFSVFLG LLLVIGILE  |
| Q2T9Y1 | ELIKQGGHLNPLKFLIFDWNWRDQKLRMMDIPEIRKEVF      |
| Q3SY17 | ALKCHGIGEYYRGLVPI LFRNGLSNVLFGLRGP I KEHLPT  |
| Q2HJI0 | PQRRESRFLSPEFIPPRGRTNPLKFQIERK DMLERRKI LHI  |
| Q6ZWZ2 | RTILLSVISLLNEPNTFS PANVDASVMFRKWRDSKGKDEY    |
| Q61206 | LKNGELENIKPKVIVVWVGTNNHENTAE E VAGGIEAIVQLI  |
| Q0P5D3 | SIKPQELLEWELVVLGK LKWNLA AVTPHDFIEHILRKL PQP |
| Q9NQX7 | SSQVRTQMELEEDVKIYL DENYERINVPV P QFGGDPADII  |
| Q96AZ1 | DVTITDLPLALEQIQGNVQANVPAGGQAQVRALSWGIDHHV    |
| Q969Q5 | GKTSLVERYVHDRFLVGPYQNTIGAAFVAKVMSVGDRTVTL    |
| Q3TBL6 | NLALQAQKKILSKIASKTVANMLID DTSSEIFDELYKVTEI   |
| Q96MU5 | LLGDHRC LVPFRDLNPSSEVNTANLLESFSS LLLTSCYICS  |
| Q8NE22 | DGVLIDGNDKGI SKVVYRSCNGRDR LGPLKMSDSTWLTSEI  |
| P19639 | RYVMGDAPNFDRSQWLSEKFN LGLDFPNLPYLIDGSHKVTQ   |
| Q62193 | AGRPSMSNFGMSESFNFSGNNFMPANRLTVVQNQVLNLIKA    |
| Q9TQE0 | LAGDTQPRFLKQDKFECHFFNGTERVRYLHRGIYNQEENVR    |
| Q8R092 | RQIMRFAMKSRRGPHVPVGH NAPKDLKEEIDIRLSRVQDIK   |
| Q9CR58 | TVATHFLSSFTCGLV GALASN PVDVVRTRMMNQRALRDGRC  |
| P56880 | LALSGVSGVLTATLLPNWKVNV DVDSNIITAI VQLHGLWMD  |
| P41217 | VTQDEREQLYTPASLKCSLQNAQEALIVTWQKKKAVSPENM    |
| Q9Z1P5 | QSALPCSCDNISGCS DVS DKNLNC SRPPCQSE LHCILDDV |
| Q3T0C6 | QGYIDDLKFLKPYGLEEQKNLTDCTNGTFFEQKGPEYTAC     |
| Q9BXY0 | NAIEKELLERLKQD TYGDIYNFPIHAFDKALEQQEAE SSS   |
| Q8N4E4 | LEELEWKLAEVGAIQTDLEENPRKDMVDMVSSIRNTS IHD    |
| Q9H5J8 | SISPIEESTA EDE DATHLEDNECDIKLAGDSFIVSSEFPVR  |
| Q9BTT0 | NIISGGLEVLAEKCPNLTYLNL SGNKIKDLS TVEALQNLKN  |



|        |                                             |
|--------|---------------------------------------------|
| Q3SWZ3 | FTFLATEVEMQGEMINRIEKNILSSADYVERGQEHVKVALE   |
| Q5SS90 | SHQREVVVSI PDYMYEEFNPQANGSYESRQGPFFDRK      |
| A2VDP0 | LSSNLP TNNKMEHGNNNDKQNHDLTHRKSPLGPVRS PPLSP |
| Q91U24 | VRHVDNPNNGDGRCTICYLLNKNWDAKLHGGVLRIFPEGKS   |
| P11034 | EVELRIMDKKACKMYKHYDYNFQVCVGSSTKLKTAYMGDSG   |
| Q57239 | TASVLPVVRQHTLALITTKNMNPAMVAEAAKAHQALMRSL    |
| Q9ZIS7 | RSAGLTFPNDFYFLAERKIFNYASVFIMLIEYVEGVELNDM   |
| P01584 | KLEFESAQFPNWIYSTSAENMPVFLGGTKGGDITDFTMQ     |
| Q9CXW3 | RSFDLLVKNLNGKNYSMIVNNLLKPI SVESSSKKVKTDTVI  |
| Q96GD0 | APELLERLARAGKAALFVSNNRRARPELALRFARLFGGGL    |
| Q9JII2 | IFNMTSTISENFNNLSSETLNDFDTEYDPHQFQNRPTMTC    |
| Q5BKY9 | AMARSRGPIQSSGPTIQDYLNRPRTWEEVKEQLEKKKKGS    |
| Q03084 | RGGIKYATSEIKAQVHFYRANYISYQDFIINIITRIFVRLI   |
| Q2HJB9 | SELELDDVVITNPHIEAILENEDWIEDASGLMSHCIAI LKI  |
| Q96PQ5 | EREKKRQFEMRRTLHYNEGLNIKLARQLISKDLHDDKVEE    |
| P25401 | VEKDRPTFVVTPSFFKVKPNGQQLRI IMASDHLPKDKES    |
| Q2HJ38 | RFEPEKLREGRNIGLQMGTKNFASQQGMTAYGTRRHLYDP    |
| P35695 | EAPYLVHSKTGFSGVGTESNPGVAWWWGVWEKGAEVYFFA    |
| O08547 | QSGRDLQYQSQAKQLFRKLNEQSPTRCTLEAGAMTFHYII    |
| Q7L9L4 | QEEAHLNTSFKHFIFVQEFNLIDRRELAPLQELIEKLTSK    |
| Q49B24 | LSRRQTEEPWLWEDGSTLLSNLQIRSTVTEKDS SHNCAWI   |
| Q8N699 | RSNLSLASLTFQRQASLEQANSFPRKSSFRASTFHPFLQCP   |
| Q8BV13 | AAYLQLLNLFAYGTYPDY IANKESLPELSVAQQNKLKHLTI  |
| P04370 | G TSAEDTAVTDSKHTADPKNNWQGAHPADPGNRPHLIRLFS  |
| Q9GZU7 | DLRRVLI LDNSPASVVFHPDNAVVASWFDNMSDTELHDLI   |
| Q810N6 | EHPHHEHAVQLLEEDIVGRNLLYAACMAGKSDVIKALAKY    |
| Q8IWL2 | I AVPRNPEENEAIASFVKKYNTYAYVGLTEGSPSGDFRYS   |
| Q9BT22 | RERLVATAVKLHGGIDILVSNAAVNPFFGSIMDVTEEVWDK   |
| Q9EQT3 | LCAEEVKAVSYIECSALTQKNLKEVFDAATVAGIQHSDSQL   |
| Q3T0W0 | RVMGGLLPFFLACAVYLLVRNADQPPWVNVLLKILPVLILA   |
| Q9Y275 | ELSLVTLFRCIQNMPETLPNNSCYSAGIAKLEEGDELQLAI   |
| Q5VXT5 | SAGATPSMGLANISVLFGFINFLLWAGNCWFVKETPWHGQ    |
| P32043 | RSRTSYTRYQ TLELEKEFHFNRYLRRRRRIE IANNLCLNER |
| Q8BQN5 | VSMNDNFYPSVTWAVPVS DSNVPLLTRIKRQSF TTVLVAM  |
| P06343 | PCFYFTNGTQRIRLVIRYIYNREEYVRFDSVGEYRAVTEL    |
| A8MUP2 | SPHPVDVLGVDFSPVAVAHMNSLLEGGPQTPLCPGHPASS    |
| P55212 | TVSHADADCFVCVFLSHGEGNHIYAYDAKIEIQTLTGLFKG   |
| P97801 | DTALIKAYDKAVASFKHALKNGDICETPDKPKGTARRKPAK   |
| O43508 | AQEPAQEELVAEEDQDPSSELNPQTEESQDPAFFLNRLVPR   |
| Q9Z1R4 | ESGGAI PKLDWDPVDSGGVKNLGVSAQGRGLTIGPEALLEK  |
| P59542 | WYATVFNSALYGLEVRIVASNAWAVTNHFSMWLAASLSIFC   |

|        |                                            |
|--------|--------------------------------------------|
| Q0VCI2 | KELPEEEVNDMLHQGKWEVFNESLLTEISITKAQLSEIEQR  |
| Q9QXT5 | SPSADGTRCLSKEGSPVPVNPNTAGVDSMAREEVYRLQARV  |
| P70284 | KALLSQQTHLSTLQVCNWFINARRRLLPDMLRKDGKDPNQF  |
| F7BWT7 | DFVQKKFKCCGGEDYRDWSKNQYHDCSAPGPLACGVPTCC   |
| A4FUA8 | PPTAQVVGVLKIQVHYEDGNVQLVSHKDVQDSVTVSNEAQ   |
| O35381 | RENVFKLLPQVMYLDGYDRDNKEAPSDVEGYVEDDDEEDE   |
| Q8N954 | SLKRKAEEKLESYRKKIHMKNQAEKAAEQFRMRLKKNQDE   |
| Q80YF6 | SVKFLVMDAAGPPKAETKWSNFIYLHQKPNPSIDTWPGRR   |
| P70202 | PQMKPVQHLAWVACGYVMWQNSTEDTWYKMLKIQTVKVQR   |
| Q4VC05 | DNSNQSSIADASPIKQENSNSNSPAPEPNSAVPSDGTEAKV  |
| A7YWN2 | HVNPRTIFASHGNFFNIKVFNSAWGWTCTFLGGFVLLVFL   |
| Q32KQ5 | GESVYSSYKISWIIFTAYLNVFLFISGFLSLLQYKQPID    |
| P15119 | KERCGGFLIAPQFVMTAAHCNGSEISVILGAHNINKNEPTQ  |
| P53811 | FHSVKTKRGLGPNWKKELANTPDCPRMCAYKLVTKFKWW    |
| Q6QHK4 | SGGYSSTENLQLVLEERRVANAKERERIKNLRGFARLKAL   |
| Q6ZMJ4 | QQGLTDVEVSPKVESVLSLLNAPGNLKLVRPKALLDNCFR   |
| P13726 | AGASGTTNTVAAYNLTKWSTNFKTI LEWEPKPVNQVYTVQI |
| O60682 | RLASSYIAHLRQLLQEDRYENGYVHPVNLTPFVVSGRPDS   |
| P00435 | KNEEILNCLKYVRPGGGFEPNFMLFEKCEVNGEKAHPLFAF  |
| Q9H4Y5 | SHRTRLVLKAKDIRHEVVNINLRNKPEWYYTKHPFGHIPVL  |
| P62917 | IAAEGIHTGQFVYCGKKAQLNIGNVLPVGTMEPGTIVCCLE  |
| P59041 | QLERERRLRARREALRKKQENQANKGTSWDDTRDATFFVVL  |
| Q865R3 | GSESFFVSSSQGRSELHIENLNMEADPGYRCNGTSSKGS    |
| Q0III6 | DIKKAYRKLALKWHPDKNPNKKEEAERKFKQVAEAYEVLSD  |
| Q9R1P3 | YKMRNGYELSPTAAANFTRRNLDCLRRTPHYVNL LLAGY   |
| Q9BRN9 | CPRQRYPANCTVRDHVHCLGNRTFPKMLYCNWTGGYKWSA   |
| P14901 | PQDLSEALKEATKEVHIQAENAEFMKNFQKGQVSREGFKLV  |
| O97563 | QKMIRYEIKQIKMFKGFEKVNDIQIYTPFDSSSLCGVKLEA  |
| P04231 | SDVGEFRAVTELGPRDAENWNSQPEFLEQRRAAVDTYCRHN  |
| Q86XK3 | KHIDSEFEENTNLKNTLKNLNVCESQSLDSGSCSALQNEFV  |
| Q02739 | CHAEPCNTVDCFIKPKSEKNIFIVFMVVTAVICILLNLVE   |
| A6PWV3 | YLEKKLEELVEMIKDDGEKNLEFGRSNSNSLTGEP TCAES  |
| Q9JKK1 | WTELLQGPSAATREEIDWTTNELRNNLRSIEWDLEDLDETI  |
| Q9HAN9 | ESDVLWKHRSNIHVVNEWIANDISSTKIRRALRRGQSIRYL  |
| Q9CRC9 | ILITGAHKAFALYKAMEEGVNHMWTVSFAFQQHPRTIFVCDE |
| P61028 | MLVYDITNEKSFNDIKNWIRNIEEHASSDVERMILGNKCDM  |
| P97952 | VTYNHSGDYECHVYRLLFFDNYEHNTSVVKKIHLEVVDKAN  |
| Q8N2K1 | EFPFKPPSIYMITPNGRFKCNTRCLCSITDFHPDTWNPAS   |
| Q86VU5 | TLEQPQGDSSMTCEQAQLLANLARIQAKKALDLGTFGTYS   |
| A6NDL7 | PQVKELSWGVALDTNFRSSNFDYILAADVYAHPFLEEL     |
| Q3ZBK2 | KMMFMGFVRLGVWQNFRAWNGGFSGNLDGEGFILGGVFVM   |

|        |                                             |
|--------|---------------------------------------------|
| Q9NYW4 | IINLLLTVQIGLTFYHPPQGNSSIRYPFESWQYLYAFQLNS   |
| Q2KI75 | ELQEVRRGIERQLQEHEMLLNTKMRLEQEIATYRRLLEKEE   |
| P61294 | GEQSVGKTSLITRFMYDSFDNTYQATIGIDFLSKTMYLEDR   |
| Q9JHK0 | LLEGVKSILIQMQNGDTEDENYPGWSGLASLKSETEDIRLF   |
| Q6QLQ4 | AFFPNSFQVRNTAPQESLLHNCVWIHGSEVYNQICNTSSYS   |
| Q2HJF5 | MQCVAAGHQIVALANLRPAENQVGSDELDSYMYQTVGHAI    |
| Q9H446 | DAELLEIKKKRMKEEQAGKNKLSGKQLFETDHNLDTSDIQ    |
| O18883 | LDRHLVILSKKHLETKFLKLNVEKAPFLCERLRKVIPTLA    |
| Q5MJ68 | TSPVVTTQVELGGCSRQGGGFLRFRQHQEVQAFSLLED      |
| Q15466 | FWSLELSPKEYACLKGTILFNPDPVPLQAASHIGHLQQEAH   |
| P78369 | AGASLCIIGGVIFCFISISDNKTPRYTYNGATSVMSSTRKY   |
| P59034 | DIPADTVLLKLDANRISRVPNGAFQHLPQLRELDLSHNAIE   |
| P98086 | TLGNVVIFDKVLTNQESPYQNHTGRFICAVPGFYFNFQVI    |
| Q0VD01 | ILRYLFPVPKDDSRVITFANQDDYISFRHHVYKKNHNRV     |
| Q8NGN7 | IVIYLPNPSALLGSIQILNNLVTMPLNPLIYSLRNKDVK     |
| Q6QRN6 | FGFSFTGEVREFFRSILSVLNGLTVP IASIDIPSGWDVEKG  |
| Q02242 | QIIQLPNRHFHMNILDTRRNDSGIYLCGAI SLHPKAKIEE   |
| Q9DA08 | YRTKLRGLYTTAKTDAEAE CNILRKALDKIAEIKSLEERR   |
| O55125 | AVLPLKHLDEDEYPCSLVGNWNTWYGEQDQAVHLRFSGGYP   |
| Q62232 | ERENSENSSSSHNPLASSLNGSGKSVLGSSEDEKTPSGTP    |
| Q8BGU2 | HEPSEMSNRTMTIYFDQVLVNI GNHFDLASSIFVAPRKG IY |
| Q5E9F2 | EMTPEVRQRVLDEAKTAFLLNIQLFEELQGLLTQKAKHDHP   |
| Q2M2E3 | YFIGWLVLILYFTCAILCYFNHKSFWSLILSHPSGAVSCSS   |
| P0C8J7 | GQLGGQEDDVQVNEADAFYTNPAQAREFAEATGIDSLAVAI   |
| Q9BRX5 | LVARLDEMERGLFQTGQKGLNDFQCWEKQASQITASNLVQ    |
| Q3T0N1 | GGFPERTLSRLGSRASTLRRNDSIYEASNLYGISAMDGVPF   |
| P05531 | LSSDEM QDGNAPELDVIEEHN PVTRDDENANPEEVVGDTRS |
| Q8MKH6 | EKFDLMAK LKQKYEINVLYNRISHAQFRKGAGKGRVGGRR   |
| O88983 | LLRAVSTRQITQLEGDRRQNLDDLVTRE RLLLASFKNEG    |
| Q8BWR2 | GVIIMGEDDDSHPSMRLYKNIPQMSFDDTEREPEQTFSLN    |
| P20334 | VIVLLLVGCEKVGAVQNSCDNCQPGTFCRKYNPVCCKSCPPS  |
| P68543 | VSKAKNIEVENKNNSAVFLNNLEPITNIQIWLANKRIVQ     |
| Q3V1I0 | DPALIAAII SRESHGGAVLQNGWDHKGQRFGMLQLDKNMYH  |
| Q8WTZ3 | KRIHTEDKFYKYECDKSFKNISTLITHKIIYVVEKFYKCE    |
| P11233 | LVGNKSDLEDKRQVSVEEAKNRAEQWNVNYVETSAKTRANV   |
| P33781 | FNWQGVVPSAPVTQSSWAFVNGLDIPFTPGTEQLNITLDSN   |
| Q17RH7 | RRCISGSTKRCRCSRIAGPNALGSGGSRSSSSSSRSILSS    |
| O54709 | QDFLKLKVSYHWMGLVQIPANGSWQWEDGSSLSYNQLTLVE   |
| P63103 | TEQGAELSNEERNLLSVAYKNVVGARRS SWRVVSSIEQKTE  |
| Q28203 | KCHRWTSCERKGLVEQHVGTNKTDVVCGFQSRMRTLVIIPV   |
| Q8K072 | IVQAKERSYETMLSFGKRSLNIAASAAVQAATKSQ GALAGR  |

|        |                                                                                   |
|--------|-----------------------------------------------------------------------------------|
| P54368 | GPRWCS D A P H P P L K I P G G R G N S Q R D H N L S A N L F Y S D D R L N V      |
| Q9CY66 | G S F R G G R G G F G R G G G R G G F N K F Q D Q G P P E R V V L L G E F M H P   |
| P12402 | T T I M F H E F D E K Y A Q N Q P Y T I N A T K S C H T N S L H T P Q E R E K A L |
| P49615 | K L Y S T S I D M W S A G C I F A E L A N A G R P L F P G N D V D D Q L K R I F R |
| Q8IX05 | S I E D V R N Q C T D H G A D M I S I H N E E N A F I L D T L K K Q W K G P D D   |
| Q8BP99 | C Q P D L Q P D N N S N F V E S A K D A N K N W H G V P G K V D P I L I R S S S E |
| P37980 | V K K G L R Y V A N L F P Y K G Y I W N Y G A I P Q T W E D P G H N D K H T G C   |
| O95452 | L L L K V C F R R S K R A Q T Q K N H P N H A L K E S K Q N E M N E L I S D S G Q |
| Q5E9J3 | L G L Q L A S M L G C S F Y E V S V S E N D N D V N A F H V L C K E V S H K Q Q   |
| Q3T093 | T G R S A F I G I G F S D R G D A F D F N V S L Q D H F K W V K Q E S E I S K E S |
| P35293 | A Q G V I L V Y D V T R R D T F V K L D N W L N E L E T Y C T R N D I V N M L V G |
| Q8TBG9 | M S S L N T S V V F G F L N F I L W A G N I W F V F K E T G W H S S G Q R Y L S D |
| O88452 | Q H C L V N A G D V G C G V F E C F E N N S C E I Q L G H G I C M T F L H N A G K |
| P06344 | S L R R L E Q P N V V I S L S R T E A L N H H N T L V C S V T D F Y P A K I K V R |
| Q5E997 | P V K I E G Y E D Q V L I T E H G D L G N G K F L D P K N R I S F K F D H L R K E |
| Q9EST4 | F Y T D C L V P M V G N N P Y A T E E E N S N E L S I N T E V Y S L P S K K L V V |
| Q96AH0 | N R V N D P L I F I R D I K P G L K N L N V V F I V L E I G R V T K T K D G H E V |
| Q9UN19 | A A E A L L S N G C D G S Y L L R D S N E T T G L Y S L S V R A K D S V K H F H   |
| Q9D0I8 | K Y L F I F S V A N M R N S K L K D I R N A W K H S R M F F G K N K V M M V A L G |
| Q32KM6 | I Y E G Q W R N D K P E G E G M L R L K N G N R Y E G N W Q R G V K N G S G R F F |
| Q9D7J7 | F T Q L A G P D M E V G A T D L M N I L N K V L S K H K E L K T E G F S L D T C R |
| Q08DK7 | E G W R V F T R G L A S T L L R A F F V N A A T F A T V T V V L S Y A R G E E A R |
| Q8C4A0 | G S V L P W P V A L P S V L Q I A I T F N L A T A T A V Q I S W K T S G A H A N P |
| Q5VT99 | G L P S V P D P F P L D V R K L L V A G N R I Q R I P E D F F I F Y G D L V Y L D |
| Q14493 | D E M R T R V N K E M A R Y K R K L L I N D F G R E R K S S S G S S D S K E S M S |
| P70447 | I K K T R R L K A N N R E R N R M H N L N A A L D A L R E V L P T F P E D A K L T |
| A6QPM6 | R S K R L F R D L V S L Q V P E E Q V L N A A L R E K L A L L P P Q A R A P P P K |
| Q9NXJ0 | I V S S I L A F I G V I L L V D M C I N G V A G Q D Y W A V L S G K G I S A T L   |
| P37980 | V V E V P R W S N A K M E I A T K D P L N P I K Q D V K K G L R Y V A N L F P Y   |
| Q9EPA7 | E S D V L W R H Q S N I H L V N E W I T N D I S S T K I R R A L R R G Q S I R Y L |
| Q9CWG1 | T W P Y K Q G A T C S D C P K D D K C L N S L C I N P R R D Q V S R Y S V D Y P   |
| P62996 | Y R R R H S H S P M S T R R R H V G N R A N P D P N C C L G V F G L S L Y T T     |
| P11023 | G Q K E S S D Q N F D Y M F K I L I G N S S V G K T S F L F R Y A D D S F T P A   |
| Q14469 | S R H S K L E K A D I L E M T V K H L R N L Q R A Q M T A A L S T D P S V L G K Y |
| Q80VP8 | T N L F S Q V Q Y M K A V G S Y T T N V S L I A P R S E H L V N F T V K A E V     |
| Q47456 | L Q R T G E V L P R S L I S S L V W M N F D S D T N V I D V A V R R L R S K I D   |
| D3Z423 | K E A Q E M A A S Q N K E L S A L R K E N G E L K K I L D I L K G S P S C Y Y G S |
| A6NGY1 | H S S E K H T Q R Q A G S D P N P N K E N S E E T K L K A G N S T A G S E P E S S |
| Q8N511 | A R L E K I K I Q L A N E E Y K R I T R N V T C Q D T R H G G T L S D L G K Q V R |
| P05208 | A G S A A V Q V S K L V V H Q R W N S Q N V G N G Y D I A L I K L A S P V T L S K |
| Q91X79 | S T E D V P E T D A R V V G G A E A R R N S W P S Q I S L Q Y Q Y G G S W H H T C |

|        |                                             |
|--------|---------------------------------------------|
| Q8NBR9 | LLPVPLAPHPLCLSGQLYLPNIPCTVIDGCGPVIHSHLKLTM  |
| P58465 | KCVVIDLDETLVHSSFKPISNADFIVPVEIDGTHQVYVVK    |
| Q2KJA4 | SYTVVGPSSVLTYSQPLITNVVTRSAAAPVGPPLGFEH      |
| Q5M956 | DKSLIEEVFPEIGDVMCNSVNAGWNHDSHVIRFPLNGYCH    |
| Q8R1H8 | PSGCP IQAKQPSGQPAPLGYNGCQEQLGLFQTPGSSPRAQH  |
| Q15907 | RAFAEKNNLSFIETSALDSTNVEEAFKNILTEIYRIVSQKQ   |
| Q9DAY2 | WEYLSFLKSSDKNNKFLAMFNLSYCIDHDSKYIILLQLRLK   |
| Q6PER3 | GCVHLRKKVFKQAKLEHEYIHNFKVLQAAPFKMGVDKII PVE |
| Q9BTT0 | TYLNLSGNKIKDLSTVEALQNLKLNKSLDLFNCEITNLEDY   |
| Q8BG22 | PSPNPYQTAMYPIRSAYPQQNLYAQGAYTQPVYAAQPHVI    |
| Q8N801 | TDTPIPGTYHLKTFIEESLLNFVIATYNFKNEGRKKPPLVQ   |
| Q6T310 | GKSAMIVRFLTKRFIGDYEPNTGKLYSRLVYVEGDQLSLQI   |
| Q3ZBE1 | EEPDALSVVNQLRDLAADPLNRRRAIVQDQGCLPGLILFMDH  |
| Q6NZB0 | YVEHTVKERKKQLKKEGKPTNVEEDDPELFKQAVYKQTMKL   |
| Q9R0U0 | YSPRNSRPTGRPRRSRSHSDNDRFKHRNRSFSRSKSNRSR    |
| Q5TA50 | GGPQSEHYRSLQAMVAHELNSRLVDLERRSHHPESGCRTVL   |
| Q9BEG9 | AVRKLQESGFYWSTVTGGEANLLLSAEPAGTFLIRDSSDQR   |
| Q58DF9 | ENEDTVSIRNLNVCKFQLSNNSVSFFLYNLDSYASYICK     |
| P41247 | SILPPSAHELAQNRLHVSITNAKTRENHLVSTFSSREDLIK   |
| Q14002 | NVTHNDAGFYTLHVIKENLVNEEVTRQFYVFSEPPKPSITS   |
| P57076 | LQAPGSTELEELTVQVARVYNGRLKVQRLCSEMEELAEHGI   |
| Q99M03 | LAFTRLWIYSHHIYNKCKRRNILEWAKELSLTGFSMPGKPG   |
| Q32PF7 | AGPLPGRCGTESDASPAETENEPLPPRHGAPVGGESNGGCP   |
| Q2KI14 | LRRHLELKEKGRHVVLGSIENKMEGKGNLPSGGEACREEK    |
| Q2NL24 | PMVGNNPYATAEENSAELSINAEVYALPSKKLVALQLRSIF   |
| Q9D4V7 | NAEEINLDCTNPRSSAAGSSNAVKLSRFFDKVIEKRYFFRE   |
| Q86TA1 | ALPAPQYMNLLMDWIEVQINNEEIFPTCVGVFPKPNFLQIC   |
| Q8NC69 | DSMLGAMFGGDFPTARDPQGNFYIDRDGPLFRYVNLNFRTS   |
| O00501 | GGVLYLFCGLLALVPLCWFANIVVREFYDPSVVPVSQKYELG  |
| P09210 | LDSSLISSFPLKALKTRISNLPTVKKFLQPGSPRKPPMDE    |
| Q9D7A8 | EIYDILQSSNLADGDSFNEMNSRRRKAQFFLGTTNKRAKTV   |
| P56965 | DHRYDKLTVPDDTAANCYLNIPSKGHVLLHRTPEEYPESA    |
| Q5XG99 | DSLNLKALQYGCKVADIKKVNNFIREQDLYALKSVKIPVRN   |
| P20618 | DCLTLTKIIEARLKMYSNNKAMTTGATAAMLSTIYLSRR     |
| O70255 | HMDPFRPMSGRFKDRVVWDGNPERYDVSILLWKLQFDDNGT   |
| P19879 | KLTAKDFADIPNLRRLDFTGNLIEDIEDGTFSKLSLLEELT   |
| Q969F1 | TLGTCVIFEENVEHADTEGNNKTVLKYKCHTMKKLSMTRTL   |
| P68509 | TELNEPLSNEDRNLSVAYKNVVGARRSSWRVISSIEQKTM    |
| A0JN87 | FTATLGRHGVFNMVYFGFYFNVKNIIPVKNKPTLEFLRKF    |
| Q99463 | VPLGFILICYLKIVICLRRRRAKVDKKEGRLNENKRIN      |
| Q9CQY8 | GLMAIPATMMSLAARKRACCNNKTMFLSSLSVITVVGAV     |

|        |                                             |
|--------|---------------------------------------------|
| P97428 | NSKNGVAAFHAFKTEFSEENLEFWLACEEFKIRSATKLA     |
| P21311 | YHLASVLEYRSSEGHFVIVSNSDTSLSIRSLYRNFTHHYIKA  |
| Q9DCX1 | TIVMVQGHRCGEDWFQPKLNYRVPSRGHKLTVTLSCGRPS    |
| Q8R191 | VVSWVFSIAVFGPIVNEGYVNSDSGPELRCVFNGNAGACRF   |
| Q3T013 | EVDALKKSVDWVSDWSSRPENIPPKEFHFRHPKRSVLSMR    |
| Q6DKI1 | FPNLKSVRELI LKRGQAKVKNKTIPLTDNTVIEEHLGKFGV  |
| Q96HA8 | ADSYLKNFASDRSHMKDSSGNWREPPPPYPCIETGDSKMNL   |
| A2AQ14 | PFLVGI EGFLKSSTYNLLFCNSCGTPVGFHLYSTHAAMAAL  |
| Q920C4 | SAMWCLGNVCGLREAITSPPNVSESGILPEGSSENENLNTQP  |
| Q9CX62 | DACLEHWQGLEAEDWTAALLNRGRSRQPLVLGDNCFADLVH   |
| Q96F24 | LLIQERWKRAQREERLKAQQNTDKDAAHLQTSHKPSAEDA    |
| P62821 | YRGAHGIIVVYDVTQESFNNVKQWLQEI DRYASENVNKL    |
| P12658 | DLCEKNKQELDINNITTYKNIMALSDGGKLYRTDLALILS    |
| P05402 | SWNNPLHHLVTELQHMKELSN AFLSSATRFENMSEKLQAFI  |
| Q9Z2X2 | NPDAKDHYDATAMHRAAAKGNLKMVHILFYKASTNIQDTE    |
| Q8IUB2 | LESWITAGEHAKEGECPPHKNPCKELCQGDLCPAEQKCT     |
| Q0VCQ4 | TSPGALDNITVVVTADGKLP LNQISQISMKSPQLILVNMASF |
| P08246 | HNLSRREPTRQVFAVQRI FENGYDPVNLNDIVILQLNGSA   |
| Q7Z4H3 | RLALVHDMACIVGDIAPADNIPKEEKHREEEAMKQITQL     |
| A4FUA8 | TVSNEAQTAKEFIKIEHAENEYQTAISENYQTMSDITFKA    |
| A6NLC5 | MTPVEQLPSTEIPARPREPTNTIQISVSLTEHFLKFASVFQ   |
| Q99M02 | CTGTLGAVHKSCLEKWLSSSNTSYCELCHTEFAVEKRPRL    |
| Q91X52 | ALLQPFLVETKEACDTSFNVNLRAVIQVSI VAKGMIARGV   |
| Q9H0E2 | CRLRLGYAVYETPTAHNGAKNPRWNKVIHCTVPPGVDSFYL   |
| Q61759 | QPWHVAVFRYKICYGGVLLNPNWVLTAAHCYGNQYNVWLG    |
| Q9NPA0 | VVNTSDPDMRREMEQSMNMLNSNHEL PDVSEFMTRLFSSKS  |
| Q6Q6R3 | SLVVRHLDPSPIPSDLHPLANKALGDRLSFRCEHWRCGLL    |
| B7ZW38 | ASNVTNKMDPHSMNSRVFIGNLNTLVVKS DVEAIFSKYGK   |
| P14438 | TWLRNSKSVADGVYETSFVNRDYSFHKLSYLTFFIPSDDDI   |
| P46737 | HSLTHLDSVTKIHNGSVFTKNLCSQMSAVSGPLLQWLEDRL   |
| Q62446 | FESKRFGKTETISKVSEQVKNVKSDDKPKDSKSEETLDEG    |
| Q8R1L4 | FALVFTTRYLDLFSNFISIYNTVMKVVFLLCAYVTVYMIYW   |
| P01732 | FSGKRLGDTFVLTLSDFRRENEGYFCSALSNSIMYFSHFV    |
| P25393 | LSERPVAFRLNGDILRHLKNALMI IYGMSKVDTNDCRGMS   |
| Q9D142 | RGGPGGLAEEGELIEVIHLNLDQAQAFADNPDI PKTLGVI   |
| Q32KU6 | LVAAIIGFVFRHEIKNSLKNYKALKQYNATGDYRSDAVD     |
| Q58DH1 | NRHRAPFLSEKSTRQAPRGTKNTNLSLKSNGKLASSFVE     |
| Q96BD8 | KPPKEQRSIKEMPFITCDEFNGVPSYMSRLTYNQINDVIK    |
| Q32LM7 | KELEISELNAKLRTQEREKQNEMIKQLQLEFDAQLARVQIKT  |
| Q01730 | QLKELHIQGNRLTVLPPELGNLDLTGQKQVKAENNPVWTP    |
| Q0VC21 | PWALDLLRALPRVSLANLRPNPGSRKPERRRRGQRRGRKCG   |

|        |                                             |
|--------|---------------------------------------------|
| Q15475 | HLHKNESVLKAKAVVAFHRGNFRELYKILESHQFSPHNHPK   |
| Q3ZCC4 | QTCLKRIRLDLPILHEDFVSNNDVEEENNGHDVTATELDHF   |
| O14668 | NSILKRYPRANGFFEEIRQNIERECKEEFCTFEEAREAFE    |
| Q9Z2C6 | FVGICLFLCLSVLAIVGMKSNRKILLAYFIMMFIVYGFEVA   |
| O55023 | MEKLCSTPIHGIRSVGTAAVNMCLVATGGADAYYEMGIHCW   |
| O75841 | CCGVNGPSDWQKYTSAFRTEENNADADYWPWRQCCVMNLKEP  |
| Q9D1D6 | CSGPLPIEAIITYLDQGSPELNSTINIHRSSVEGLCEGIGA   |
| Q6Y1H2 | SGTRKKKGFPLATAYLVIYVVMTAGVLVIAVGLVRAYLA     |
| Q8R2R5 | LLLKLRGLGVVDLGLGECLNLEWLDLSGNALTHLGPLASL    |
| Q9N0T5 | KTESNQEVANPEHYTKHPLQNRWALWFFKNDKSKTWQANLR   |
| P17026 | HTGKKSHKCADCGKSFQSSNLIQHRRihtGEKPYKCDECG    |
| Q9BYD2 | MKNVWELNPEIVARHFFKNLGVVAPHTLKLPEEPI TRW     |
| O14668 | IERECKEEFCTFEEAREAFENNEKTEFWSYTKAQQGESN     |
| P54368 | LLEFAEEQLRADHVICFHKNREDRAALLRTFSFLGFEIVR    |
| Q95104 | ELMGDAQLNDGALEAEARDSNEEEPKEQVKRYGGFLRKYPK   |
| P61266 | PDEKTKQELEDLTADIKKTANKVRSKLKAI EQSIEQEEGLN  |
| Q91YN9 | IGCALEDQKKIKRRLETLLRNIDNSDKAIKLEHAKGAGSK    |
| Q7TSP5 | NANLEYKTGAFSMPEINVDYNASSESLRCEAPRWFPPQPTVA  |
| P62242 | PAANTKIGPRRIHTVVRVGGNKYRALRLDVGNFWSWGSECC   |
| O88551 | IGSIVSTALPQWKIYSYAGDNIVTAQAIYEGLWMSCVSQST   |
| Q2KIX7 | VFQEVLYNHQGHFDPATGVFNCSVPGVYHFGFDIELFQSAV   |
| Q8TCT1 | LLQFVAKQGACFEVILISDANTFGVLESSLRAAGHHSLFRRRI |
| P19404 | AGLTAHWGRHVRNLHKTVMQNGAGGALFVHRDTPENNPDTP   |
| Q8N4T8 | GRAVAQLMARKGYRLAVIARNLEGAKAAAGDLGGDHLAFSC   |
| Q70IA6 | ELHGHNLTYVHFILFAREFNLLDPKETAIMDDLTEVLCSG    |
| Q9JHL0 | KGSNQEPDAAVVDPIPTNYNWGCFQKPSDEDDDSNSYENVL   |
| Q96CS7 | AGLYQQPANQVIIRERYRDNDSLDLGLMAGAAATGMALGS    |
| Q9JHL0 | YYNWGCQKPSDEDDDSNSYENVLVCKPSTPESGVEDFEDYQ   |
| Q8JZY2 | AKLQSPQAVLQLGVSKEDAKNVEKVLVEFNHKELFDFYNKL   |
| Q9NUR3 | LYRRRTFVPGKSRKTYGSINLRMRQLNGDGGQALVENEV     |
| Q9UHW5 | PAGSGKSTYCATMVQHCEALNRSVQVVNLDPAAEHFNY SVM  |
| Q9JHR9 | LGTSKDLQPHSVIQRRLVEGNQRRLQGESPLLQALIRGHDS   |
| Q9NX04 | DCQPLLSSLSNLAEQLQAAQNLRFEDVPALRAF PDLKERLR  |
| P28074 | SRATAGAYIASQTVKKVIEINPYLLGTMAGGAADCSFWERL   |
| Q8CCX5 | KVSQKYENENMETVTKQAVVNRDVKESAEAHGTIQTEKVDE   |
| Q8VCH2 | GIYWCGITKGGPDPMFVNVNIDQAPKSSMMTTTATVLKSI    |
| P59190 | TELVLQHRKELEGLMRASNELALAELEEEGKPEGPANS      |
| Q80ZA7 | RDDTLALSMYQGPPSADQGNMADAPRFGFWTSVSQCLQYL    |
| Q9BRX5 | SQSLLOTFIGRFRRIMDSQONAYNEDTSALVARLDEMERGL   |
| Q9DCM0 | TAHRDAQLIKELGLKLLYAVNTHCHADHITGTGVLRSLLPG   |
| Q13242 | LRVEFPRTYGGRRGWPRGGRNGPPTRRSDFRVLVSGLPPSG   |

|        |                                              |
|--------|----------------------------------------------|
| Q15631 | VEDYLSGVLILASELSRSLSVNSVTAGDYSRPLHISTFFINEL  |
| Q9NV56 | HLSTMYDMQALHESEILPFPNPERNFVLP EEIIQEVREGKV   |
| Q14469 | LSTCEGVNTEVRTRLGLHLANCMTQINAMTYPGQPHPALQA    |
| Q62066 | SPLRPAFPAAGPPCPALGSSNCALGALRDHQFAPYSAPVYK    |
| Q9R0Q8 | AGEPNNIVLVEDCATIRDSSNSRKNWNDIPCFYSMPWICEM    |
| Q4FZH1 | ARFLEQSSCSMTPDIHELVENIKSVLKSDEGHMEEAITSAS    |
| Q9D1G1 | SYANVKQWLQEIDRYASENVNKLVLGNKSDLTTKKVVDNTT    |
| Q9CQE0 | TRNFVSHLNQRHQFDYGEFVNLQLDEETQYQTAVEESFQVN    |
| Q9CVB6 | SKAYIHTRMRAKTSDFLKVLRARPDAEKKEMKTIIGKTF8     |
| O70302 | VLEEDGTVVDTEEFFQTLRDNTHFMILEKGQKWTPGSKYVP    |
| Q80X71 | IAEEMSYMYDFCTLLS IKVHNIVLMMQVTVTTAYFGHSEQI   |
| O00161 | RTKNFESGKAYKTTWGDGGENSPCNVVKQPGPVTNGQLQQ     |
| P54797 | PILNKYAAVWCRCASYGTRTNTIILVDANGHVTFTERSMLD    |
| Q5TZF3 | ESEGPPESSESSEFFSQEEENEAEQPEETGPKNPLLQP       |
| Q9BX73 | LCSYLPDEFIECEDPVDHVG NATASQELGYGCKLFGGQAYS   |
| Q61469 | SIGESLSVYFNVLHSNSFVGNFYIAT IYKAVGAF LFGVSAS  |
| Q496A3 | FYPRFSSNIHTYHVKGQCF FNGVFLGNKRSLSER TVDKCFG  |
| Q2KIN3 | VHKASLIIDLFGNEHDNFTKNLENLMSTIQESYCSNWRCP     |
| O95983 | GKMLMSKMNKSRQVRVYDSSNQVKGKPDNLALPVRQTASI     |
| Q9CZ96 | DTRKSKGVAFILFLDKDSALNCTRAINNKQLFGRVIKASIA    |
| Q8TCT1 | GVESSLRAAGHHS LFRRI LSNPSGPDARGLLALRPFHTHSC  |
| Q8WUU5 | AAEKKVSTKKGRRHIFKLNPIKAPESVSTIITAESIFYK      |
| P59544 | DQILTALAVSRIGLLWALLLNWYLTVLPNPAFYSVELRITSY   |
| O08899 | HHECGLAAFKAF LKSEYSEENIDFWISCEEYKIKSPSKLS    |
| Q9CY66 | CKCTTEENKVYFNAPVYLENKEQVGVKDEIFGQLRDFYFS     |
| P04233 | QALPMGALPQGPMQ NATRYGNMTEHDHVMHLLQ NADPLKVYP |
| P61028 | NWIRNIEEHASDVERMILGNKCDMNDKRVSKERGEKLA I     |
| Q9Y5M8 | TGLYRDTQTSITDSCAVYRVNNRGNLSLTLIDLPGHESLRL    |
| Q8R0A0 | KLSLEGIVVQRAECRPAASENYMCLKRLQIEESSKPVRLSQ    |
| Q1LZ79 | RFAEDNDSSEDDCGIVCDLSNMVITDEL RQYFAETE QHREE  |
| Q99M54 | PSRDPETPQSSGSKRSRRKANSKVLGRSPLTILQDDNSPGT    |
| Q8N1Q8 | KTAFLAGEGLFTLSLNIRFKNLPVDSLVMVDVELDKIEDQ     |
| Q28071 | AENKILVKQSPMLVVNDNEVNL SCKYTYNLF SKEFRASLYK  |
| Q2KI30 | RDKSYETMMRVGKRGLNLAANA AVTAAAKGQV LSEKLSRF   |
| Q9UGC6 | QQSQNEGTPAVSQAPGNQRPNNTCCFCWCCCSCLTVRN       |
| Q3SZW3 | WEHDYTPLCLRLIKVFLTSNFQAIRVTLNINRKLAF LAIL    |
| P31955 | NKTEGEKSTEKPKRKKKGKNGKGRNRNKKKNPCTAKFQNF     |
| P52743 | NATTIANHWRIHNEDRSYKCNKCGKIFRHRSYLAVYQRTHT    |
| Q32KY3 | HDRAHVIKKSKNNKTGDEEVNQEF INMNECDAHAFDDEWQN   |
| P43487 | YITPMELKPNAGSDRAWVWNTHADFADEC PKPELLAIRFL    |
| Q66JS6 | LKKLQEESDLELAKETFGVNN TVYGIDAMPSSRDDFTTEFG   |



|        |                                            |
|--------|--------------------------------------------|
| Q17QK8 | GTLGDVSKRWVDLTDPTENVNYWTLNLTSTLCLTSSILQAF  |
| Q15024 | ASATPEFEGRGGDDLGEIANTLYRIFNKKSSVDLKTLCIS   |
| A6QQJ5 | KTEKGNSAESKMISPGLCRQNSQELETKTHLSETDIRVAA   |
| Q64326 | NPYCVCYMSLFQVNGMLIMCNAVIDPFIYAFRSPELRDAFK  |
| P32972 | VVQKKDSTPNTTEKAPLKGNCSEDLFCTLKSTPSKKSWAY   |
| Q9Y6H3 | DASTSQIVLCQNNIHNQAHMNRVVTHELIHAFDHCRAHVDW  |
| P07516 | TPPSLKAVQRIAESHLSISNLGENQASEEDELGELRELG    |
| Q57239 | ATIGEYGAGIDGADSLNELSNLMEHGAVAALADKISQIVAK  |
| Q8NGY7 | AINNCFLLTVMGYDHYMAICNPLRYRVITSKKVCVQLVCGA  |
| Q9BR09 | TALDPASLAPVPEFSLPDLVNLGHTWVFAITRHHNRVPREG  |
| Q6UX82 | LVLKGCNSVSNATCQFLSGENKTLGGVIFRKFECANVNSLT  |
| Q5BVD1 | SLDEEVPPAEANKESPWSSCNKNVGRCKLWMIITSIFLGV   |
| P20934 | SVTASGSSNQNGSSRHPSDNNTNLVTPAVGHKVSATDKPAS  |
| P11440 | NTFPKWKPGSLASHVKNLDENGLDLSKMLVYDPAKRISGK   |
| Q9D7K5 | EIQKFQNVFEAVDASGCAINYQGLSNLPLKELRSLSLQR    |
| Q9NQX7 | VVTEHVSDKEALGSFIYHLCNGKDYRLRRRATRRRINKRG   |
| Q9BY27 | VLRQALRQKHQEAQQACRPHNLPVVQAAQQRELEAVEHRIR  |
| Q86V81 | MNIQLVTSQIDAQRRAQSVNRGGMTRNRGAGGGGGGGTR    |
| Q61200 | KDSKSFNCRIEYKVDKATKNTLCNYDPSKTCYQEQTQSHV   |
| Q2HJI8 | IEEHASSDVERMILGNKCDMNDKRQVSKERGEKLAIDYGIK  |
| P16368 | CNADIVIRAKAVNKKEVDSGNDIYGNPIKRIQYEIKQIKMF  |
| Q4G0X4 | DSMLGAMFSGKMPTKRDSQGNCFIDRDGKVFYIILNFLRTS  |
| Q9WV68 | VDQALQEFGKINILINCAAGNFLCPASALSFNAFKTVVDID  |
| Q8BJ73 | ESRKCPKRLCPGERNPRQKNRDRRQRKDRKLERRPHQRG    |
| Q99KR7 | FTLKHVGPVLSMANAGPNTNGSQFFICTIKTDWLDGKHVV   |
| Q9R0M5 | ARFRHLWKALLRACADGGANHLVDLTEGERESFLPEFVSG   |
| Q9UJ68 | FWVLKGVYSTQVGFAGGYTSNPTYKEVCSEKTHAEVVRVV   |
| Q08DP3 | NDSVNENS DTVGQIVQYIMKNEANVDILAAMVEDNNVCDPE |
| Q3ZC25 | YIGVKSAYVSYDVQKRTIYLNITNTLNI TNNNYYSVEVENI |
| P06345 | YINKQYLEQTRAELDTVCRHNYEGVETHSLRRLEQPNVVI   |
| P06798 | EPVVYPWMKKIHVSAVNSSYNGGEPKRSRTAYTRQQVLELE  |
| Q5HZK2 | LLGVAALTTGYAVPPKLELVNESKFSSMEDPVADYNQALMT  |
| P30907 | SLKEFYGEDAKKSRDYGRI INSRHFQRVMGLEGGQKVAYGG |
| Q9CQD7 | KDCYSGFVSTTMTPSDYMVSNAHCCQSDGCNSGSPPLNN    |
| P02747 | PHLGLKLLLLLLLLPLRGQANTGCYGI PGMPGLPGAPGKDG |
| Q9UBW8 | TYADYLAEARNLPPLTEAQKNLRLHLSVVTLAAKVKCIPYA  |
| Q9NQ4  | LRPKIGLPGVAEKSRERLIRNTCEAVVLGTLHPRTSITVVL  |
| Q8K1I3 | NSQSLSPYLFRATRSSLKRVNVLDEDTLVMNLEFSVQETTC  |
| P98086 | ICLFIKSSSGGQPRDSLSFSNTNNKGLFQVLAGGTVLQLRR  |
| Q58DU5 | DGVVFGVEKLVLSKLYEEGSNKRLFNVDHRVGMVAVAGLLAD |
| Q86T03 | GKMHQHVVKCGVCNEATPIKNAPPKGYVRCPCNCLLICKV   |

|        |                                              |
|--------|----------------------------------------------|
| Q2TAM9 | ADLAASHLEATRARDEWDRQNARLRQENARLRLENRRLKRE    |
| Q9D9P2 | AEHARLSDRTAVLGILHSLANTGRFNLNLSLLSHAERESCQ    |
| A5D989 | SGPSGDHSELVTRIASLEVENQSLRGVVQDLQAVSKLEAR     |
| A0PK84 | FSPAFLHGALFLFLSANALGNVYLVIQNSPDDLGTCCQGTMS   |
| Q2M2T8 | TGRFQSQEEQRKKETACIKANNYSKDDFCLATKKVICDPS     |
| P41236 | QPRGNVDEELSKKSQKWDEMNILATYHPADKDYGLMKIDEP    |
| Q29463 | SSWTLNDNDILLIKLSTPAVINARVSTLLLPSACASAGTECL   |
| P25787 | KATAMGKNYVNGKTFLEKRYNEDELEDAIHTAILTLKESF     |
| POC591 | RNMTLVDAIQQVAKNRCVLPNRFGLKQLRELDRLVQQRRQ     |
| Q8K3W2 | RLLPQQLRRLRELRTIWLSGNQLADFPVLLRMPFLEVIDV     |
| Q91238 | MPREEKQKRREESAKLKEEGNERFKRGDYMEAESYSQALQ     |
| Q99JR6 | RDHLHQGTGRYQVIEGIISPVNDSYGKKDLVASHHRVAMARL   |
| Q04743 | PFLNGFHSAAAAAAGRGVYSNPDLVFAEAVSHPPNPAVPVH    |
| Q2HJF3 | LFTTAALLSACKILKLVDRNKMAATSGVKKAI FDR LCKQL   |
| Q8BMB3 | DQATTARIRDTLRRVLNLPNTIMEYKTHTDSIKMPGR LGP    |
| P49795 | HSPAGRSVFRFLRTEYSEENMLFWLACEELKAEANQHVV D    |
| P35270 | AARDMLFQVLALEEPNVRVLNYAPGPLDTDMQQLARETSVD    |
| P68543 | SELQGI FDKEEVDVKVEDKNEICLSTKPVFPFSGQG HRL    |
| Q28001 | ECEKSSATTYFWYREALDISNSISESGGLNWKMTLCLLVAW    |
| Q08DT6 | RLQTTLSRRGLEEFFDDPKNWGEEKVKSASWTCQQLRNK      |
| Q8VI63 | ELHGHNLNLYVHFILFAREFNLDPKETAVMDDLTEVL CSS    |
| Q13126 | LLARHGRQHTIMPSKVNYQANIWALKEEGCTHVIVTTACGS    |
| A6NM10 | LTLFLFLFLAHGVTLDGASANPTVSLQEFLMAEESLPGTLL    |
| Q9EQ00 | IKFLALGCSSLGRTLNTAMKNVCEILTSDEGGPARIPFET     |
| Q8N2G6 | FGEYKCPKCKRKMMSGNSWANMGQECIKCHINVYPHKQRPL    |
| Q9D2E1 | VEAIRYCHGCGVAHRDLKCNALLQGFLNKLTDGFAKVL P     |
| O60258 | IGKPSGKSKDCVFTEIVLENNYTA FQ NARHEGWFMATRQG   |
| Q32NC0 | PATPTS KLSLKT PERRTANPNHDMSGSKGSPASVFRTP TS  |
| Q9DBJ1 | WTVLDAIDQMWLPVVRTWR LNERHYGGLTGLNKAETA AKHG  |
| P15949 | WHVAVYRYNEYICGGVLLDANWVLTAAHCYEEENKVS LGKN   |
| Q2TUM3 | GSDGAAENQAGVRYISIKPDNRKLANGTNVLGLLVD TLLKE   |
| Q9NPC3 | QYQKLQGLYDSLRLRNITIANHEGTLEPSMIAQSGVLGFPL    |
| Q9D3J9 | HARASQHSRSQSRTVLQANSNPFVESP TLAAV GICRDVIRE  |
| Q6P8I6 | VDMPVFFYIDPEFAEDPRMVNVDLITLSYTFEAK EGHKLP    |
| Q5FW52 | DGEDEATCRQGEQPPGGPGNIATRPKSLAISSSLASDVVR     |
| A6H7I7 | GKRALCPTCSLPLSEKERFFNYCGLERALVEVLGAERFS PQ   |
| Q9BYD2 | GAGRLLRGGVQELLRPRHEGNAPDLACNFSLSQNRGT VIVE   |
| Q96FE7 | FLVSNMLLAEAYGGCFWDNGHLYREDQTS PAPGLRCLNW     |
| P28845 | MKKYLLPILGLFMAYYYY SANEEFRPEMLQGGKVI VGTGASK |
| Q8N4S7 | TGYRPASSGSGCLRSFLYLHNELGNIYTHGLALLGFLVLP     |
| Q8NHV1 | EEEEKEIKLLKLYDEKIKNIREEAERNIFKDVFNRIWK M     |

|        |                                             |
|--------|---------------------------------------------|
| Q6P0X2 | DHMRVRLHLYPADFRFDKPKTNRGPAMPAAADAATRAPTDSS  |
| Q8K4Z2 | LFMWAGVIALFCRQYDIKDNPNNNKEKTKSASETSTPEH     |
| A6NGY1 | KTAFSHSSEKHTQRQAGSDPNPNKENSEETKLKAGNSTAGS   |
| Q96QU4 | PEKECSLSLNKKSRSSTPVHNSEIQETCDAAHHRGRSRACTG  |
| Q9P0I2 | QSRMMQEOMTGAAMAMPADTNKAFKTEWEALELTDHQWALD   |
| Q5E9G3 | EMETDKQEKKVVKCGFLPGNEKVLALLALVKPEVWTLKEK    |
| Q9H190 | KGKIVSLVKGSSAARNGLLTNHYVCEVDGQNVIGLKDKKIM   |
| Q6UWN5 | TTSPWTAIDLQSCCEGYLCNRKSMTPFTSASATTPPRAL     |
| Q9QY36 | LRRHLELKEKGMVLAALENKAENKGNVLLSSGEACREEK     |
| P97822 | GGLEVLAEKCPNLTYLNLSGNKIKDLSTVEALQNLKLNKSL   |
| Q3UX61 | VSLHVRKSNRAALHLYSNTLNFQVSEVEPKYYADGEDAYAM   |
| Q8CCM6 | QGPDPKAKEDSTKQVSIIRNQREETGVMSQKVVREAGRNV    |
| Q92930 | IGDSGVGKTCLLFRFSEDAFNNTTFFISTIGIDFKIRTIELDG |
| P04394 | EILQVPPMRVYEVATFYTMYNRKPVGKYHIQVCTTTPCLR    |
| Q8BVP6 | AFRAVSLHNWKWLLLRSMVCNQRGCEETVVFIEGTGSKGV    |
| Q5T0J7 | CGTCCEKCLLCAKNNYNRGNIPSEASGLYKGGEEPVTQP     |
| Q8BZ09 | LEFLRKFVGFVSGTMGSVFNIPFDVAKSRIQGPQVPGEI     |
| Q3SXB8 | GEPGIPCECSQLRKAIGEMDNQVTQLTTELKFIKNAVAGLR   |
| Q8BGI3 | VLSFSGVVLALVNLQIQRNVTLPFDEVIATIFSSAWWP      |
| Q1RMJ7 | IPKASRVKPEYSQMSYSYNQYYQYQNYAQWGYDQNTG       |
| Q9Z1L4 | YHKPLGFESGEVTPDQITCSNPEQYVGVYSSWTANKARLNS   |
| Q8VCH9 | RTQSVHKNFNNLKRARIANNPWHCDCTLQVLRSMASNH      |
| Q9CQ58 | LSFLKSQGHYKLLAMFNLSNCIYNETYHILFYLRLEKQCI    |
| Q6IRU5 | ESKEETPGTEWEKVAQLCDFNPKSSKQCKDVSRLRSVLMSL   |
| Q9KIP8 | AFAGAVKAWFAENPQGNDRNYMRVGMAMDAMKEVVRNKINVC  |
| Q9DBS2 | ALLIQAVKKAQKESPLPGQANTVVLVLERPLLIEYVGLMSF   |
| Q13432 | DSGTVLFEIKKPPVSERLPINRRDLDPNAGRFVRYQFTPAF   |
| Q9H741 | GCCNVNVPSTKQYCCDGCWPGCCSAYEYCVSCCLQPNKQL    |
| Q9D8X2 | RAAFTAEEVQLPRLKQENPNMRLSOLKQLLKKEWLRSQDN    |
| Q8TDU5 | LLFTQAILVSSDLFESWNIQNNDLKCKIITFLNRVMRGVSI   |
| P06880 | LLWPQEASAFPAMPLSSLSFNAVLRAQHHLQLAADTYKEFE   |
| Q92871 | KRYCLDSDLQDSFDTHFFGNETSPPGNDFEIFADPRTVGH    |
| Q920L5 | KFAMFITLSQITQMLMGCVINYLVFNMQHDNDQCYSHFQN    |
| P13727 | DASKKDGAVESISVPMVDKNLTCPEEEDTVKVVGIQGCQT    |
| P14434 | VFPKSPVLLGQFNTLFCFVDNIFPPVINITWLRNSKSVADG   |
| Q6PHZ8 | EIYSQFFPQGDSTTYAHFLFNAFDTDHNGAVSFEDFIKGLS   |
| Q6ZTW0 | GRALWHLRLAHHSQRAAFNNNVSVAYECLSAGRRKRPGLD    |
| Q5T0L3 | ESQLEAYDFPEVQQDEGKWDNCLSEDMAENICSSSSSPENT   |
| Q9NQ48 | QLDQGNQKDFIKAQDLSNLENTVAALKSEFQKTLNDKTEHQ   |
| Q9R0X0 | TAASTLGSQAGKLMYVMHNSEYPLSCFALFENGPCLIAD     |
| A6NI87 | PRRPPLRMPSLSTFYLLDHNTRQAEGLGAYGAPCMRLSNQ    |

|        |                                              |
|--------|----------------------------------------------|
| Q60961 | VFIIFKAYLINCWVWNCYKYINNRNVPEIAVYPAFETPPQYV   |
| P21765 | LNALQEDLKPFGLVILGFPCNQFGKQEPGDNLEILPGLKYV    |
| Q99967 | ASMQLQKLNQYFNHHPYFHNHYMPDLHPAAGHQMNGTNQH     |
| P22061 | LIDQLKPGGRLILPVGPAGGNQMLEQYDKLQDGSIKMKPLM    |
| A6NM15 | AKEEHLNMFIQNLLWEKNVRNKDNHCMEVIRLKLGLVSIKDK   |
| Q8CJ26 | QGQDGDREGMWVGAGGALAPNTSSLPPEPPGASSNIIIPVY    |
| Q5FW52 | ETIKTPTTHPRAAGRETKYANLSSSSSTASESQLTKPGVIR    |
| Q1JQA4 | IELIGGVVALIFRNQTIIDFLNDNIRRGIEINYDDLDLDFKNIM |
| P59025 | BQCYGERGGQYRIHVASRQDNRRHRGEFCEACQEGIVHWKP    |
| P08637 | CLVMVLLFAVDTGLYFSVKTNIRSSTRDWDKHKFKWRKDPQ    |
| Q2KIU3 | KLGLMKNDTQILEKESKAKDNRYHLSGNVVLQTLGDRVWL     |
| Q62276 | VRAGESLMKLVSDLKQFLILNDFPSVNEAIDQRNQQLRALQ    |
| Q9JJW6 | FDSGCGGEGVETGAKLLVSNLDFGVSDADIQELFAEFGTL     |
| Q13670 | FHLLCLLAMCYCNGKNGPEHPNPGKFFTARGFPASATFQTTT   |
| Q15744 | KGKKAVNKDSLEYRLRRERNNAVRKSRDKAKRRILETQQK     |
| Q8CCX5 | QCHHLQVEIESLHAVERGLENSLQASEQHYQMQLQDLESVI    |
| Q8N4C7 | EINITKAQLSEIEQRHKELVNLNENQIKDLRDLFIQISLLVE   |
| P30405 | PAARACSKSGDPSSSSSSGNPLVYLDVDANGKPLGRVVLE     |
| Q99N10 | IISGSLVAEETQPNPCLLNGSVGLNIFSAICSAVGIMLF      |
| Q96EY4 | RKAAQITREAHKQEKKEKLNKNEKALRLNLVGEKQWFQNH     |
| P28801 | EDYVKALPQHLKPFETLLSQNKGGQAFIVGDQISFADYNLL    |
| P14148 | ELIYKRGYKINKRIALTDNSLIARSLGKFGIICMEDLIH      |
| O94903 | GEESKHGLPPSETIAIVEHINAKCPNLEFVGLMTIGSFGHD    |
| Q8TDB4 | TDAAARETTEVNPETTPEVTNAALDEAVTIDNDKDTTKNET    |
| Q3T063 | TLKAQFPSVSVASGGVRLDNLQFCGPHIDVISLGLMTQA      |
| Q3UP87 | HFCGATLIARNFVMSAAHCVNLNFRSQVVLGAHDLRRQE      |
| Q9BY14 | EAITIVQHSSPPGLIVTSYSNYCEDSFCDKDSLSQFWEFS     |
| Q5T013 | VGRPNLQLQMDIFHWQIMDGNLTGNIREFLPIVGHVQVAQV    |
| Q5VZ72 | VKGCLECDPKFIEDVGSLLGNLIPSEVPGRQTLLERQIKEM    |
| Q9Z085 | LLMLGLTLSNSYWRVSTVHGNVITNTIFENLWYSCATDSL     |
| Q9UIY3 | EMEMLFMFPNQGEVKLEDVNALTNIKRYLEGTREALPPKI     |
| Q01718 | FTISIVGVLENLIVLLAVFKNKNLQAPMYFFICSLAISDML    |
| O09172 | AAGALLARASTLHLQTGNLLNWGRLRKCKPSTHSEELRDCI    |
| Q8BHX1 | LMESVNFSPANLSKSGSRFLNALVDSAIALETKDTSLASFI    |
| Q96LT6 | GLQRDLSLAVSYSRLHSSDWNLCTVFGILLGYVPVYTFHLN    |
| Q8K177 | SVGSGLLSVSVGLVALLASRNLLRPRLHWALLTLALVNLLL    |
| Q9D819 | YLEATVDWFRRYKVPDGPENEFNAEFKNKDFAVDIKS        |
| Q5U3C3 | GSQPEQVTQRPEEGKESLKNLLLVALCLTFGVEVGFKFAT     |
| P00848 | STNLLGLLPHTFTPTTQLSMNLSMAIPLWAGAVITGFRHKL    |
| Q32L52 | RIKIREMILKGQIQEAIALINSLHPELLDTNRYLYFHLQQQ    |
| Q96H79 | LRILLQNDPCLLPEVCLLYNKGEALYGYCNLKDCKCNKFHV    |

|        |                                              |
|--------|----------------------------------------------|
| Q9JKT3 | TGRSVYFSTFFLLCWKFLDANSLWLVTIILNSLYCVKITNFQ   |
| A6ND01 | ERRNSGRCLQKWFEPAQGNPNVAVARLFASSAPSWELSYTI    |
| P00551 | DALAVFLRRLHSIPVCNCFNNSDRVFRLAQAQSRMNNGLVD    |
| P02753 | FVDETGQMSATAKGRVRLNNDVDCADMVGTFTDTEDEPAK     |
| Q13491 | GTTGVEQICVDIRQYGIIPWNAFPGKICGSALENICNTNEF    |
| Q9D142 | RPAVYAGEVERHFPGSLTAVNQDQPQLQALPGSAGVMVE      |
| P52483 | AAPEPEEQEERKPSATQQKKNTKLSSKTTAKLSTSAKRIQK    |
| P55041 | RWSIPADARHLMVQKDPHFCNLRNRHSTAPEEHCRSSWSSD    |
| Q8BTF8 | NITNKNDPKSINSRVFIGNLNTAIVKKVDIEAIFSKYKIV     |
| P20036 | AFSFEAQGGLANIAIILNNNLNTLIQRSNHTQATNDPPEVTV   |
| P55327 | SFFDFDAGVNKSYLYLSPSGNSSPPGSPTLQKFGLLRTPV     |
| Q91V37 | LFCGVCVGIVGSGAALADAQNPSLQVVKILIVEIFGSAIGLF   |
| Q96CE8 | SIIVNIILLYFPNGQTSYASSNKLNTYVWYFEGICFSGIMML   |
| Q9GZP4 | NIPQMSFDDTEREPDQTFSLNRDLTGELEYATKISRFSNVY    |
| Q5VXT5 | IFAFGSCGSYSGETGAMVRCNNEAKDVSSIIIVAFGYPPRLH   |
| Q3T062 | EWEMMCRVKPDVVKDKETERNLQRIATRGVVQLFNAVQKHQ    |
| Q9D9B0 | FWKEDKAFWREDNALWERDRNLLQEDKALWEEKALWVEER     |
| Q05716 | QSRTHEDLYIIPINCDRNGNFHPKQCHPALDGRGKWCVCV     |
| P38117 | AEKEKVDLVLGKQAIDDDCNQGTGQMTAGFLDWPQGTASQ     |
| P09611 | MFNEFNKQFGEKNFTSKVINSCHTEFMTTPNNKEAAANTE     |
| Q810N5 | LFFFHIRDLVSVFINRFVELFNLTMTQIILPMMNLNEESCICKD |
| Q95IE3 | RRVHPKVTVYPSKTQPLQHNNLLVCSVSGFYPGSIEVRWFR    |
| Q32KM6 | NDKPEGEGMLRLKNGNRYEGNWQRGVKNGSGRFFHLDHGQL    |
| Q60819 | GFKRKAGTSTLIECVINKNTNVAHWTTPSLKCIRDPSLAHY    |
| Q505H4 | HPKCTKVEHNGCCPECKEVKNFCEYHGKNYKILEEFKPSPC    |
| Q8K1A0 | DIDEDALEIFNKNVEEFELTNVDMIQCQDVYSLSNRMSKLF    |
| Q2M2T8 | RQRPSKAKIKSHPCVFI SRNFHTGRFQSQEEQRKKEACI     |
| Q9H3N1 | ELLEGDWMIEFYAPWCPACQNLQPEWESFAEWGEDLEVNIA    |
| Q60809 | ILRLFFPVIYDVVKYLMKSKCNLKGGLQEVAEQLELERIGPQ   |
| Q3T0Y3 | WWKKKEGHPILFLFYEDMKENPKQEIKKVVRFLEKNLDDEI    |
| Q810P2 | GTNIPVFRAAPSYSLASTNKNWFHKENIAGGPGPAMHTRPE    |
| Q9TR36 | CAYKLVTIKFKWWGLQSKVENFIQKQEKRIFTNFHRQLFCW    |
| P55083 | PVFCDMTTEGGKWTVFQKRFRNGSVSFFRGNWYKLGFGGRAD   |
| Q9D287 | NWQRKNMQLTAGSKLREMESNWSLVSKNYEITERTIVQLEN    |
| P16563 | KKSTPYQQGTPCASCNNCENGLCTNSCDFEDLLSNCESLK     |
| Q6ZUS5 | FLEYLTNKTEEYTEQPEKVVNSYLQKSGEIERRRQESASRY    |
| Q9D883 | NVYVKFREEDAOKAVIDLNNRWFNGQPIHAELSPTDFRE      |
| Q9Y224 | VWLEDQKIRHYKIEDRGNLRNIHSSDWPKFFEKYLRDVNCP    |
| Q8BGR6 | IKAVPFQNAVLNVKELGGADNIRKYWSRYQGSQGVIFVLD     |
| Q47108 | DKIGEHLGDKYKAIADKADNIKNFQGGKTI RSFDDAMASLN   |
| Q9QXV3 | REASPADLPIDPNEPTYCLCNQVSYGEMIGCDNDECPIEWF    |

|        |                                              |
|--------|----------------------------------------------|
| Q8BL86 | KVLPGHFNTFGAERLFRLASNYISKAGICHKVSTFAMRSLA    |
| Q6PHN7 | FKLQMHMLNGALLALLFPVVNTRLPPFELEYIYIQHAMLYV    |
| O35740 | SQGGSLPASMQLQKLNQYFNHHPYPHNHYMPDLHPTAGHQ     |
| Q2TBT3 | TSTLRFPRPWKPLETRGCSSNPGAAGREIQVCALAGPNQGI    |
| P09630 | RGRQIYSRYQTLELEKEHFHFNRYLTRRRRIEIANALCLTER   |
| Q0P5D3 | TNTDVDCLKACQEQIEVLLNSLQYRQDQGDGSKSEDELD      |
| Q9Y680 | LVSCHRTTLHLVKCMYLLVNNNTCAEGKIPPDATLIFEIE     |
| P55212 | CEMLGKYGSSLEFTELLTLVNRKVSQRRVDFCKDPSAIGKK    |
| P16114 | NLIEKDLSRKWTLGIADAFNASEITIRKRESENTNFNQI      |
| Q9D3B1 | TIYAALPFVRQAGLYSISLPNKYNFSFDYHAFILIMISYI     |
| Q3KRA9 | RGMVPERLPPWLQRYVDKVSNSLSLFGGLPANHVLVNQYLPG   |
| Q2WGJ8 | GVGVLWLVISSLPRRRLVNLNHRGVYHFSIQGRVTCQGPL     |
| Q7YRZ7 | IREANVTVIDRKICNDAQHYNFNPVIDLSMICAGGRKGEDD    |
| Q8VEN2 | HLGLFLCLALHLSPLSASDNGSCVVLNDIYTSDILEISTM     |
| A2VE67 | MILVVAKEVWGDEQADFVCNTLQPGCKNVCYDHYFPISHI     |
| Q99J56 | SFWFGRFKACYLPWVILGFNYIIGGSVINELIGNLVGHLY     |
| Q8BHX1 | KASEYESEAKRLEDFLMESVNFSPANLSKSGSRFLNALVDS    |
| Q8K3Y3 | ERRPKGKMQKRRSKGDRCYNCGGLDHHAKECKLPPQPKKC     |
| Q06520 | VLYGSWFDHIHGMPMREEKNFLLSYEELKQDTRTIEKI       |
| P40313 | HCNVSPGRHFVVLGEYDRSSNAEPLQVLSVSRATHPSWNS     |
| Q2TBK4 | IPQYEVNAWTEILYNLSERNRIRDRDVLVLTEDLKQKAKE     |
| P24369 | PKTVDNFVALATGEKGFYKNSKFHRVIKDFMIQGGDFTRG     |
| Q9QXT8 | ILLRGTVHEKWKWAFNLYDINKDGCITKEEMLAIMKSIYDM    |
| Q99437 | SIIFCEAVAIYGIIMAIVISNMAEPFSATDPKAIIGHRNYHA   |
| P97822 | EVTELVLNCLCVNGEIEGLNDTFKELEFLSMANVELSSLA     |
| P09630 | NSTAYDPVRHFSTYGAAVAQNRIYSTPFYSPQENVVSSSR     |
| Q7M759 | QYSSREKDAIECFMTRTSKGNRIACMFVRCSPNACYTLLFS    |
| Q2PT27 | NLKDAIFKSCDLSMADFRNINALGIEIRHCRAQGSDFRGAS    |
| Q9QWG7 | ALDRIVHHTSFEMMKENPLVNYTHLPTAMMDHKSPPFMRKG    |
| Q01081 | SRLHNKPTFSQTIALLNIYRNPQNSSQSADGLRCAVSDVEM    |
| O75431 | TELDALVFGHLYTILTTQLTNDLSEKVKYNSNLLAFERRI     |
| Q17QN8 | DHFELCLAKCRTSSQSVQHENTYRDIKACYGESPPPELFP     |
| Q1JPH6 | EERAQRPRQLKPRTVATPLNQVANPNSAIFGGARPREEVV     |
| Q8IWL1 | VGLTEGSPGDFRYS DGT FVNYTNWYRGEPA GRGKEQC VEM |
| Q5BU09 | TGESESSSEDEFEKEMEAELNSTMKTMEDQLSSSLGTGSSSG   |
| P62609 | PQGLVIPPEQAPGKLEFTRENGGLTLFNPTPYLYLTVTDLKA   |
| O00194 | LGDSGVGKTTFLYRYTDNKFNPKFITTVGIDFREKRVVYNA    |
| Q9D1G0 | QAVAEIDALYDVYLDVIDKWNTDDMLFLGDGFNADCKYVKAH   |
| Q05685 | PEDKLHDQCSPWKKNACCSVNTSQELHKADSRLYFNWDHCG    |
| Q68FG0 | EKMAHVEELRLIHADINVMENTIKQSENDLNKLESTRRLH     |
| Q9ES30 | GNTVFSMYSYETK GKSDTSSNHAVLKLAKGDEVWLRMGNGA   |

|        |                                                    |
|--------|----------------------------------------------------|
| Q1JQA8 | IALKYGVSMEQIKRANKLFTNDCIFLKKTLNIPVISEKPLL          |
| A5PKI3 | LLTFYVISQVFEIKMDASLGNLFARSALDAVVRSTKPPRYK          |
| A2AQ14 | VVLEPFVLVGIIEGFLKSSTYNLLFCNSCGTPVGFHLYSTHA         |
| Q9D9M5 | AVTSLPFTSGMIELLSFLRMNKDRFDCCIISDSNSIFIDWV          |
| Q32KN9 | TWNINHARLMVVEERCYVRVNSDNSGWTEIRREAWVSSSLF          |
| Q8K015 | YQADQLESDFCDVLTGPLQRNALCNLLSFTYKVEQRCQTF5          |
| P53518 | QISNNKAYPLIVQSNIWDENNKNHDFIATPPIFKMESES            |
| Q05B50 | RLQGTLAADKNEILFSEFNINYNNEPLMYRKGTVLIWQKVE          |
| Q9CQA5 | ALEDLEVL5RELIEMLAISRQKLLQLEENQVLELLIHRD            |
| P09211 | GRTLGLYGKQQEAALVDMVNDGVEDLCKYISLIYTNIEA            |
| Q3SZY3 | SDDTYPEIEKFFPFNPLDFENFDLPEEHQIARLPLSGVPLM          |
| Q9UHV2 | CLLDDGLEGLFEDIDTSMYDNELWAPASEGLKPGPEDGPGK          |
| Q9H8H3 | K5IAENRHLQFERFVVAAGENMHQVADGSVDVVCTLVLCS           |
| Q9DCX7 | TFILIAVCKFKMLSCQLCSDNEERVPSDQTSGGQSFVFTG           |
| Q32LN0 | HLLDTNQLDASCIPFQEFVNGEHLCSMSLQEFTRAAGTAG           |
| Q96H12 | CEGTSQPEPSCSAVRITANKNYRSKTSQEGALKKMHEEEHH          |
| Q9NTU7 | SEMSNKTRIIYFDQILVNVGNFFTLESVFAVPRKGIYSFSF          |
| Q64205 | GYYSAPQHDIYSGQPYGQTVNPHYTYHHQFNLNLAGTGAYS          |
| Q3T075 | GLDALSSII5SRQKQMGQEI5GNEI5DDEQNEI5DDL5N5VENTD      |
| Q9UHY7 | REASAAEEADVHVAVVVRFGNAGLTDDEKTYYSLIT5FSEL          |
| Q3KPI0 | VYLPENLYSYGWYKGTVEPNQLIAAYVIDTHVRTPGPAYS           |
| Q3SZX4 | DPSLK5PWTASYPGSAKTILNNGKTCRVVFD5D5TYDR5MLRG        |
| P13675 | RALVGRAVQH5KFERKDGSEVNWRGVVLAQVPIMKDLFYITY         |
| Q9D9W1 | LMPFR5SAAK5D5YPGPGTYNPEMKSVPKVTWPMKFGSPDW          |
| O70456 | HTL5ED5YK5D5TLIMQLLRDNLTLWTADSAGEEGEAP5EEP         |
| Q8BSU2 | VLSL5LAI5V5FLTAAMAYVLCNRRATQQNSAGLQLWYTPVEP        |
| P70202 | TFYQ5LMSLKRPLEAQDIPDNFGNVSPQMKPVQHLAWVACG          |
| B0YJ81 | LSPT5SPRCAATMA5SDE5DGTNGGASEAGEDREAPGERRRLG        |
| Q5HYI8 | VLVLGD5SGV5K5SLVHLLCQNQVLGNPSWTVGCSVDVVRVHD        |
| Q9BYQ8 | SCCV55SCCKPQCCQSVCCQPNCCR5PSC5ISSCCR5PSC5ESS       |
| Q3LI81 | CLP55SFHSRTCF5L5DNFQETCNETT5CQMTNCEQDLFTDD5C       |
| Q3SZU4 | AKFDQYRYTRNLVDQ5GNGKFNLMILCWGEGH55SIHDHT5D5        |
| Q14469 | FLIPNGAF5AH5SGP5VIPVYTSNSGT5V5GPN5AV5P55SGP5SLTA   |
| Q9HBV2 | LTIGV5I5CVF5I5FL5L5FI5I5N5WAAV5KAF5WGAK5ASTPEVQ5SE |
| Q9NX53 | LGAPWNTNGPPWNRHGAPPQNSL5DAPWNSL5GAPWNSL5GAPW       |
| Q9BX46 | GYGFVTMADRAAAERACKDPNPIIDGRKANVN5LAYL5GAKPR        |
| A0PJX2 | GETFL5F5SPQLK5VFKWTGSNSFFVKGDL5SLMMG5SG5GRF        |
| H3BS89 | CSDHWYETDARKHRDRCKAFNTRRVDPGFIYNNNNN5LPLRA         |
| Q99426 | YDQRQD5TVRS5FLKRSK5LGRYNEEERAQQEAEAAQRLAE5EKA      |
| P19879 | EKSFLQ5LQ5DENITPLPKKENDEMPTCLLCVCL5SG5VY5CEE       |
| Q9BSG5 | CRSALGHALPVAAPGARHCFNISISAVPRPRPGRRGREAP5S         |

|        |                                            |
|--------|--------------------------------------------|
| Q8N614 | FSVAPLVDHLEEYNTTCHLKNHTGRSTIMEDEPSKEKSINY  |
| P54709 | GMNDPDFGYSQGNPCILVKMNRIIGLKPGEVPRIDCVSKNE  |
| Q9CQ56 | QSVIKKDNQTLSSHSLKMADQNLEKLESERLEQHAQKSVN   |
| P01138 | FYTLITAFLLIGIAEPHSESNVPAGHTIPQAHWTKLQHSLO  |
| P97822 | DLSTVEALQNLKLNKSLDLFNCEITNLEDYRESIFELLQOI  |
| P29084 | TQHLDIGLKQKQWLMTEALVNNPKIEVIDGKYAFKPKYNVR  |
| Q6UX52 | GTKNIKVAKKVVKTHEPASFNLVTLKSSPDLTYFCWASS    |
| Q3SX42 | DTLDDIFDGSDEEESQDIVNQVLDEIGIEISGKMAKAFSA   |
| Q8VI33 | INPSLIGSKNILITNMVSNQNTAESANALKRKRREDDDDDD  |
| O08585 | PESIRKWREEQTERLEALDANSRKQEAWEKKAIKELEEWY   |
| Q96D29 | ITLAFFLYATQYYQRFDRINWPCLLQGHGQSGGPHPLDLL   |
| P14231 | AGANQSMNVTCVGRKREDAENLGHFVMFPANGSIDLMYFPY  |
| A6QLK2 | YSEVPNFSEPNPEYSAQQAPNKTQVNDSGPAAPQPPTGPPA  |
| Q3SZX8 | VLMDCAHLVKANSIQGCKMNNVNVVYTPWSNLKKTADMVVG  |
| Q9DC70 | LSHLPRRAEYVVTKLDDLINWARRSSLPMTFGLACCAVE    |
| Q3SZA1 | PSVFEKYTASVTVGSKEVTLNLYDTAGQEDYDRLRPLSYQN  |
| Q32L31 | KSANPGISIGDVAKKLGEMWNNLSDSEKQPYINKAAKLEK   |
| Q56K12 | LLEFAEEQLHVDHVFICFHKNRDDRALLRTFSLGFEIVR    |
| P25731 | VYTKKVLNPGTKEEYEVDPNWEGLVTPPSKIVLPGGGSK    |
| P49638 | LLRFLRARDFDLAWRLKKNYKWRACEPEISADLHPRSI     |
| P05531 | RDDENANPEEVVDTRSPVQNILGKFEGDINKRLHIKRRKM   |
| Q9P126 | WEDGSVISENMFLELDGKGNMNCAYFHNGKMHPTFCENKH   |
| Q9Z2R6 | EIKKPPVSERLPINRRDLDPNAGRFVRYQFTPAFLRLRQVG  |
| Q9QXJ4 | SVRLPTKNFEVDLLEIGGSQNLRFYKWEFVNEVDVLFMVD   |
| P04393 | KEPLDFLFLNRSCFNMGIRFNSKGGFNVPFCKKPNRFAQAY  |
| P30931 | ARVLSYPADTSSSTVEPPFTNSPEFTPYLETNLGQPTIQSF  |
| Q9UBU2 | ANRSAGMYQGLAFGGSKKGNLQAYPCSSDKECEVGRYCH    |
| P55041 | IPADARHLMVQKDPHPCNLRNRHSTAPEEHCRRSWSSTD    |
| Q9Y275 | GLKIFEPPAPGEGNSSQNSRNKRAVQGPEETVTQDCLQLIA  |
| Q8CEZ0 | MSDGWKFEQLISIGSSYNYGNQDQAEFLCVVSRELNNSSTNG |
| P99026 | GGVVIADMLGSYGLARFRNISRIMRVNDSTMLGASGDYA    |
| Q28071 | ALSNCWMKNRNRMLQSDYMNMTPRRPGFTRRHYQPYAFAR   |
| Q5SRD1 | MTGAAFGAMNGLRLGLKETQNMASKPRNVQILNMVTRQGA   |
| P10144 | SGGPLVCNKVAQGIVSYGRNNGMPPRACTKVSSFVHWIKKT  |
| Q921J4 | RHVLLTIKCLLIHPNPESALNEEAGRLLLENYEEYAARARL  |
| O00142 | VSSVRLMERSIHSARYIFVENLYRSGKMPEVDYVVLSEWFD  |
| Q9ES56 | VNGKYTADGKEVLEYLGNPANYPVSIRFGRPRLTSNEKMLL  |
| P28069 | KLKAILSKWLEAEQVGALYNEKVGANERKRKRRTTISIAA   |
| Q765P1 | FSLIAGIFLCFSCSPQGNRSNYDAYQAQPLATRSRPRFGQ   |
| Q9NPI7 | TCFRKMKGDYLETQCGYKGEVNSRPTYRMDQRLPSETIQTY  |
| P15947 | YQCGGILLNANWVLTAAHCHNDKYQVVLGKNNFLEDEPSAQ  |



|        |                                             |
|--------|---------------------------------------------|
| P35509 | ISRMEYVHSKNLIYRDVKPENFLIGRPGNKTTQVVIHIDFG   |
| Q9D711 | VLIAGEPLREPVVQHGPFVMMNTNEEISQAILDFRNAKNGFE  |
| Q14249 | QKAMDDTFYLSNVAPQVPHLNQNAWNNLEKYSRSLTRSYQN   |
| Q9DAC0 | LLTMELSICAFFFLYSLAINRYIPFVFWPMDMLMNDLACS    |
| Q9Y624 | SSPRVEWKFDQGDTRRLVCYNNKITASYEDRVTFLLPTGITF  |
| A7MBB3 | PYISVCGNVPPQSCIFSQVLNIGAASAAWICILRYQLRDW    |
| Q17QJ5 | DFTQEYWCQCGAFGADDWNLNIYFNCTDSNASRERCVPFSS   |
| Q9ULY5 | FTELSYNYGSGSVKNCCFLNWEYFQSSCYFFSTDTISWAL    |
| Q49A33 | KNFTNVKNAAKPLLNPHPLINKRIHTGEKPYTCEECGKAFY   |
| Q5EA90 | IGPLASEQMFYAVTNRINDENTYKICTWLEIKVHHVLLYIQ   |
| Q5E982 | ILRATKLGIPYRVIHNASIMNAVGCCGLQLYKFGETVSIVF   |
| Q5FW57 | LGTPDVINWKQHLQIQSSQSNLNEAIMDLAAGKMKVKRTO    |
| P41217 | IVTWQKKKAVSPENMVTFSENHGVVIQPAYKDKINITQLGL   |
| A2AUU0 | QVKFESDANKYWDIFYQTHKNKFFKRNWLLREFPEILPVN    |
| Q9XT56 | VEMPLEPKSNRAFSNSSYTLNQKTGELIFDPVSAASDTGDFT  |
| Q96MV1 | IFLFDEATKADPLWGGPSLANVNIAIASGYLISDLSIILY    |
| Q7TN89 | LQQIWSWTWPHHKQPLVVLVGNKCDLVTTAGDAHAAAALLAH  |
| Q3KRB8 | VHVLRYFFNFLRNVSLRSSENKMDSSNLAVIFAPNLLQTSE   |
| Q8VEJ3 | TVCVNDVCTAVEDTRPVMRNTDGGDQAYAEGTTKWPAAEN    |
| P68254 | FDISKKEMQPTHPIRLGLALNFSVFYIEILNNPELACTLAK   |
| Q6BBL6 | LYVGWAAAGLLILGGALLCFNCPPRNDKPYSAKYSAAARSAP  |
| P18468 | LVRDSRPWFLEYCKSECHFNGTQRVRFKRYFYFNLEENLR    |
| O43513 | QGIERLHPMQFDHKKELRKLNMSILINFLDLLDILIRSPGS   |
| O00194 | QSFLNVRNWMSQLQANAYCENPDIVLIGNKADLPDQREVNE   |
| Q9CWQ0 | ANGMHTLCLLDIKVKEQSLNLRGRKTYEPPRYMSVNQAA     |
| A6NDL7 | VVWPSALVLCYFLETNAKQYNMVDKNVIEIGAGTGLVSIVA   |
| Q3T0Y3 | IYLARNAKDVAVSFYHFDLMNNLQPLPGTWGEYLEKFLTGN   |
| Q15560 | PSTPRITTFPPVPVTCDAVRNKCREMLTAAALQTDHHDHVAIG |
| P04768 | LVNSLLWKNVASFPMCAMRNGRCFMSFEDTFELAGSLSHN    |
| Q99KI3 | KVVPSPMTDPTMLTDMMKGNVTNVLPMILIGGWINMTFSG    |
| Q9CQK7 | EENLGMVMIFTLVTAVQEKLNEIVDQIKTRREEEKKQKEKE   |
| Q9D309 | VNYETGKVIATKYFDMYEGDNSGPMAKFIQSTPSKSLLFMV   |
| O95843 | NGMAKDQDLEIVYKSFDFSNVLRVICNGKQPDMETDSKSKS   |
| Q9CQ37 | GRICLDILKLPKGAWRPSLNIATVLTSTIQLLMAEPNPDDP   |
| Q0VCT9 | SGGGAGSSNSGGGSGGSSSNMPASVAHVPAAVLPPNVIDT    |
| Q91U24 | PRAGVSKRHLRGDQITWIGNEEGCEAINFLSLIDRLVLY     |
| O09101 | LFVVVLTFTTVPCLCLLGPNLKAWLRVFSRNGVTSIWENS    |
| P20618 | AGGSASAMLQPLLDNQVGFKNMNVHEHVPLSLDRAMRLVKD   |
| P29965 | VLQWAEKGYTMSNNLVTLENGKQLTVKRQGLYYIYAQVTF    |
| Q712K3 | PPVDDPQSGELPSEWRNPTQNVRTILLSVILLSNEPNTFSP   |
| Q9NX53 | NGPPWNRHGAPPQNSLDAPWNSLGAPWNSLGAPWNSLVLE    |

|        |                                            |
|--------|--------------------------------------------|
| Q9DAM2 | HRNTLNDVLFHFHQVHTNLNKSQIGMIFDILLDWTAVGEIG  |
| Q3ZCC4 | EEESGRGAPVPPKRTVKRNIPKLNARLISERGLPALRH     |
| Q9H019 | RIGTNLPLKPCARASFETLPNISDLCLRDVPPVPTLADIAW  |
| P80219 | GFLVREDFVLTAAHCLGSSINVTLGAHNIMERERTQQVIPV  |
| Q9NQR4 | ECSIYLIGGSIPEEDAGKLYNTCAVFGPDGTLAKYRKIHL   |
| Q9CPV4 | DDHFVAELTYNYGIGDYKLGNDFMGITLASSQAVSNARKLE  |
| Q9NYP8 | NTIRNCSCSADIRDCDYSLANLMCNCKTVLPLAVERTSYNG  |
| Q5M956 | DSLKQHYFIDRDGQMFYILNFLRTSKLLIPDDFKDYTTY    |
| O94760 | DHRYDKLTVPDIAANCIYLNIPNKGHVLLHRTPEEYPESA   |
| Q3T0C6 | GVDDPTFGYQEGKPCILVKMNRIIGLKPQGEPRIECTGKSE  |
| Q3MHZ1 | REDEKPLVLEMLKAGVKDTENRVALHALTRPPALLLAAAS   |
| Q14088 | DLREQIQVPSNLALKFADAHNMLLFETSAKDPKESQNVESI  |
| Q4G0X4 | LSSITSHLQDPNHLTLDWVANVEGLPEEYTKQNLKRLWVV   |
| P52843 | VLFGSWFHEHVRGWLMSREWDNFLVLYYEDIKKDTKGTIKKI |
| P01190 | TENPRKYVMGHFRWDRFGRRNGSSSSGVGAAQKREEEVAV   |
| Q921I9 | QIDIYVQLQADGGTYAACVNAATLAVMDAGIPMRDFVCAC   |
| Q91WB7 | GRQRERPAAPGHPRKRAGRNEPLKKERLKWSDYPMTDGO    |
| P04925 | IHFGNDWEDRYRENMYRYPNQVYRVPVDQYSNQNNFVHDC   |
| Q8BJU2 | LKEGLLLYNTENNVLKNAWNIQAEMRCCGVTDYTDWYVP    |
| Q8R1M8 | FTLCMKAFTDLTRPYSIFSYNTRTKDNEILLFVENIGEYMF  |
| Q8C8S3 | PYISFAGDDPPASCVFSQVMNMAAFALVAVLRFIQLKPK    |
| Q8CGF5 | NQRWFFEALKYPKFSKANVINGILMTVVFVIRIISIPPMY   |
| Q8CDS7 | ILHAGGSQGWVPWKYRMFLRNDLCIKKEDSLFLEFCDVVKR  |
| O70401 | KIQSTLHCCGVTNYGDWKGTYNYSETGFPKSCCKLEGCPQ   |
| Q9D6D8 | PHNKRGLGMVKRAITPMGHNSTSHYRQLPTWIKNMWLLGN   |
| Q6PGD0 | LQTLILPQDVPCPGGSNAWDNVTFSKDKQICQGQRDLCNST  |
| Q08624 | QIKIWFQNRMRKWKDHRLLPNTKVRSAFPAGAAPTLSAAT   |
| Q9D979 | TAKFLAALCPLDAPERSLLANQEDCLPRLCSAWGLHGNISG  |
| Q53TN4 | IVTRPQWKRPKEPNSTILHPNGGTEQGARGSMPAYSGNMD   |
| Q18870 | KNKSQRKNTTSPSKQWKVGDNCCAIWSEDCIYPATIASID   |
| P97370 | YRACQFPVSLLEECSGVTDANFGYSKGQPCILVKMNRIIDL  |
| Q2T9N3 | SSIDINSSRKFLQRFLREGQNKTGTSYALDCGAGIGRITKR  |
| Q86VG3 | NIFTSAKVTHKNEADYHLRNTIFLRTSSQCLEEQVDNFL    |
| Q96FV3 | ILAFVFKDWIRDQLNLFINNNVKAYRDDIDLQNLIDFAQEY  |
| Q6PEB6 | EGQDEGVWKYEHLRQFCLELNLGLAVKLQSECHPDTCTQMTA |
| Q92913 | AAIASSLIRQKRQAREREKSNACKCVSSPSKGTSCDKNKL   |
| Q6QUN5 | ILGPSDPIILFHPVRLVVTKNLSLGPASDEYPCQVSVQNPT  |
| Q96F25 | LSNAYSPRHYVIADTDEMSANKINSFELDRADRDPSNMYTK  |
| P0C7X4 | ATGCLPLLAPPGGTSMFPFQNILFIFLLSVLPLLAIKLSVL  |
| Q7L4S7 | QGKLLFAEPKDGFFSQDINSHLASLSMARNTSPTPDPTV    |
| Q0VCT9 | GSSSNMPASVAHVPAAVLPPNVIDTDFIDEVLMSLVIEMG   |

|        |                                            |
|--------|--------------------------------------------|
| Q8VE95 | FITCFKDLQFLVTFPFRRLRPNHSGRYEASFPFLSLCGRERN |
| Q8BS03 | QMVWATSNRIGCAIHTCQNMNVWGSVWRRAYLVLCNYAPKG  |
| P05452 | FSLLTQVTTEPPTQKPKKIVNAKKDVTNTKMFEEKLSRLDT  |
| Q9D676 | FDYWIGLHRASSKHPMMWTDNTEYNMVFYHMNAQCLKKPE   |
| Q3TB92 | IRCWLKLLWALTIISITLQNAAVDCTRVENNELPSPNLNS   |
| A4D1T9 | KLAKPAMLNPKVQPLTLATTNVRPGTVCLLSGLDWSQENSG  |
| Q8K0Z7 | LCRSKNMPKSTIESALKTEKNKGIYLLYEGRPGGSSLLIE   |
| Q9BRJ7 | LSNAFVSTAKCQLLFALKVLNMMPEEKLVEALAAATEKQKK  |
| Q9D7S0 | LGGFLHVYQNKFCASNCTENSTEVAFVHFLFDDQRYHFAS   |
| Q3UWA4 | ISHYKERLNRRSRKLRKDLGNLQQLKAQEKMLQALQVDCE   |
| P0C7V0 | SRRGVRRTARPAGADTRSSANQLPQPSGACANADSAPPADV  |
| P35428 | AGFSECMNEVTRFLSTCEGVNTEVTRLLGHLANCMTQINA   |
| P57052 | KWTHQQPSDSDLYQMTAPLPNSASVSSSLNHVPDLEAGPSS  |
| Q9D7G9 | PAQYPTPEASYPSPGLQSPNNPYPLPPGSAASPGPGLSH    |
| P24586 | AQLFKERHKESSFLMVSHSLNSLKEFCDVAIVFKNSYIIGY  |
| P13761 | LAGDTQPRFLWQGYKCHFFNGTERVQFLERLFYNQEEFVR   |
| Q9CXV9 | VFYQYLEQSKYRVMNKDQWYNVLEFSRTVHADLSNYDEDGA  |
| Q8BGT7 | QEREDQVKWQFNNRAYSKNKKQVKRSIFASPESVTGKV     |
| Q60654 | LLAITIFQHSQQKHELQETLNCHDNCSPQSDVNLKDELLR   |
| Q9NVK5 | LNEVARHRPRSTLVMIQQENRQIRELQENKELRTSLEEH    |
| O08585 | AAGGPDVAVDGMNGEYYQESNGPTDSYAAISEVDRLQSEPE  |
| Q9QZ49 | FENSSQASFETINGEAARRQNLPKFSTEISPAARPLLRKEV  |
| Q8R3T5 | FQILHHTCQRYLTDKPEFINCQSKIMGNSILHSAADSVT    |
| P47758 | TGQYRDTQTSITDSSAIYKVNNRGNLSLTLIDLPGHESLRF  |
| A6NJI9 | KSPFKQKPAQRVPSDFAFANNVDKTVLDDPEDAVFVRSMKR  |
| A8MTZ7 | DVDIGSDNTDSRANRLNGDNLWIDKLPKERTKLSVGLLNN   |
| Q9Y581 | ARKLCGRYLVKEIEKLCGHANWSQFRFEEETPFSRLIAQAS  |
| P15018 | LYYTAQGEFFPNNLDKLCGPNVDFPPFHANGTEKAKLVEL   |
| P29368 | MQTEDIISVINWAEKQECIDNQRIGLWGTSLGGHVFSARA   |
| P08579 | GNSTPNPQVPDYPPNYILFLNNLPEETNEMMLSMLFNQFPG  |
| Q9UD71 | LKAVQRIAESHLSISNLNENQASEEDELGELRELGYPRE    |
| Q3UFF7 | TNSKLSLGVSTTFHSLPNLNHELNKTELEKLSWILTRLP    |
| Q99LS1 | NRARLVSYLPGFCSLVKRVINPRAFSTAGSSGDESHVATA   |
| Q3SYS0 | LPPNYRYGMSRPGSLADKKKNPPGTRRRRVAVEPIPEEDWH  |
| P56748 | TVMPQWRVSAFIENNIIVVFENFWEGLWMNCVRQANIRMQCK |
| Q921C1 | PCIGSTTCFQSHPEKTIIFLNIMFGISGACFLFIFLELALL  |
| O70378 | QRISASLLDSRYETLVDFDNHLLDIRSDWTNPEINKAVLH   |
| O88513 | NENKDVGDLTQEAFDLISKENPSSQYWKEVAEQRRKALYEA  |
| Q9CY52 | GTLTADKNEILFSEPHINYNNEPHMYRGTVLVWQKVEEVR   |
| P50294 | GTWYLDQIRREQYVPNEEFVNSDLLEKNKYRKIYSFTLEPR  |
| P50592 | PRGGRPQKVAAHITGITRRSNSALIPISKDGKTLGQKIESW  |

|        |                                            |
|--------|--------------------------------------------|
| Q8BFY6 | DADHSGYISLKEKQALVNSNWSSFNDCTCLMMINMFDKTK   |
| P20339 | AQAAIVVYDITNEESFARAKNWVKELQRQASPNIVIALSGN  |
| Q9JKM7 | ETLAREYGVPFMETSAKTGMNVELAFLAIKELKYRAGRQP   |
| Q9BV99 | ALTHLGPLASLRQLAVLNVSNNRLTGLEPLATCENLQSLNA  |
| Q9JXX8 | VNMSTGLVQDQTLWSDPIWTNRPIPYSAIDTWPGRRSGGMI  |
| P70190 | GECAGHQHCQKYCVPLCIDGNFVLLSHHNVMGDFRFFDYQS  |
| P05142 | VVLFVALLALSSAQGPREENQNIQIPNQRPPPSGFGQPRP   |
| P31273 | HVQDFHHGTSGISNSGYQQNPCSLSCHGDASKFYGYEALP   |
| Q60932 | IYQKVNKKLETAVNLAWTAGNSNTRFGIAAKYQVDPDACFS  |
| Q8BXX9 | KKYRNYDIPAEMTGLWRYLKNAYARDEFTNTCAADSEIELA  |
| Q9GZU8 | QELIEKQRREEELKELKEYRNLLKVKGISQENKKEVEKCLT  |
| Q5E9L3 | PAPYPAPAGSYPTPGLYPTPNNPFQVPSGPGAPPMPGGPH   |
| Q6UWI4 | CCCRCLRPKQDPQQSRAPGGNRLMETIPMIPASASTSRGSSS |
| Q62422 | AAKRNLSWLRECLDNRVGNGLDKAGSTALYWACHGGHKD    |
| Q92904 | QKKSVDRSIQTVVSCLFNPFENRLRNSVVTQDDYFKDKRVHH |
| P62609 | NPTPYLTVTDLKAGNKSLENTMVPQKQVTVNIPGGYTGG    |
| Q6ZVX7 | NIYEPAPPTGPTQRPLETLGNFRGWYIRTEKLQQNQSWTVK  |
| P51151 | EFIYYADVKEPESFPFVILGNKIDISERQVSTEEAQAWCRD  |
| Q96L46 | SVMSDSTTGKLGFEFXYLWNNIKKWQCVYKQYDRDHSGSL   |
| O95476 | DLSSIVILDNSPGAYRSHFDNAIPIKSWFSDPSTALLNLL   |
| P08311 | GFLVREDFVLTAAHCWGSNINVTLAGAHNIQRRENTQQHITA |
| Q7TQI3 | MDLIEQVEKQTSVADLLASFNDQSTSDYLVVYLRLLTSGYL  |
| Q922H7 | ALVVRFLLTKRFIGDYERNAGNLYTRQVHIEGETLAIQVQDT |
| Q8NCR6 | WLSQEEADKCSFNLYGSDWYNTWRMEPYNSSCCNKYTTYLP  |
| Q96BT1 | FKRKGIERWHRAVSTNLLKQNVLPKEESSSDSDMGFHESQ   |
| Q9WTY4 | FGLAIGTLAQLGQVSGGHINPATLALLIGNQISLRLRAIF   |
| P81269 | MSVPAPIYQTSYGQYIAIAPNGALQLASPTDGVQALQTLT   |
| P51674 | EKKICTVSENFLRMCESTELNMTFHLFIVALAGAAVIAM    |
| Q3T160 | APVKKSVRDTPAKNAQKSNQNGKDSKPTPRSKGQESFKKQ   |
| P00639 | VAEINSLYDVYLDVQQKWHLNDVMLMGDFNADCSYVTSQW   |
| Q7Z5A4 | EGGENPEASPAPGPEAGPPLNLFSTFPGDSSLCGRTPLRIV  |
| P20181 | SEFQPMIATDTELLRQRRYNSPRVLLSDSTPLEPPPLYLM   |
| Q8N488 | DKEKPEKDKEISPSVTKKNTNKKTKPKSDILKDPPEANSI   |
| Q9NWX6 | QGRLQGTAAADKNEILFSEFNINYNNEPMPYRKGTVLIWQK  |
| P35846 | QWVEDCQSSFTCKSNWHKGNWSSGHNECPVGASCHPFTFY   |
| Q8CCA0 | NSHLSTLASIHKIYHTLNKLNLTEDVQDDHQTGSLRSCSS   |
| Q8WXI8 | VVFILLLSVCFIASCLVTHHNFSRCKRGTGVHKLHAKLK    |
| Q9NWM8 | KGKIPPESTLIFNIDLEIRNGPRSHESFQEMDLNDDWKLK   |
| Q47066 | AFARSLGDETFRLDRTEPTLNTAIPGDRDRTTTPPLAMAQTL |
| Q61599 | TEKDAQPLEEADDDLSKLNKPPPPQKSLKELQEMDKDDE    |
| Q1ZYL8 | NCESSAQWKSVAQGLLNYINNWHKQDTSMRPRSSAFSWPGT  |

|        |                                            |
|--------|--------------------------------------------|
| P47985 | KPEWVILIGVCTHLGCVPIANAGDFGGYYCPCHGSHYDASG  |
| Q6UXN8 | GLLPAERSQSANQVCGYVKSNSLLSSNCSTWKYFICEKYAL  |
| Q58DM4 | PGNGVDSAGLTWGRIRAEGLNCDYTIILFGKAEADEIFQELE |
| Q9CQQ4 | PGIDYVQVGFPPLLSIVSRMNQTTITSVLEYLSNWFGERDF  |
| Q8N567 | LKNDAPQAKHKKKKKKKEYLNEVDVNGFMEYLRQNSQMVHNG |
| Q9CR57 | RKAKMTDFDRFKVMKAKKMRNRIKTEVKKLQRAAILKASP   |
| Q9DC16 | DDPDKDSGGKIDVSLNISLPLNLHCELVGLDIQDEMRHEVG  |
| P06748 | DEEAEEKAPVKKSIRDTPAKNAQKSNQNGKSKPSSTPRSK   |
| P17751 | GGNWKMNGRKKCLGELICTLNAANVPAGTEVVCAPPTAYID  |
| Q9Y5U4 | ESPGPKKCGPYISSVTSQSVNLMIRGVVLFFIGVFLALVLN  |
| P23812 | PYTKQQIAELENEFLVNEFINRQKRKELSNRLNLSQQVKI   |
| Q5SZD4 | RLVALTLARKLQSRGFPSQGNVLDNTASISLLKSLHAEFL   |
| Q8BIX3 | KFGRQLVPGWKLCPKCTQIINGSVDVSDDRQRKPDSDGR    |
| Q3B7M5 | YDYSAADEDEVSFQDGDITVNVQQIDDGWMYGTVERTGDTG  |
| P17322 | KATVHRKRCQCASQTDKKCWNFCQAGKELRQDSMEKAWNN   |
| P52907 | TIDGQQTIIACIESHQFPKNFNWRWRSEWKFTITPPTAQ    |
| P01911 | RECHFFNGTERVRFDRYFYNQEESVRFSDVGEFRAVTEL    |
| P27105 | ILTKDSVTISVDGVVYRVQNLAVANITNADSATRLLAQ     |
| P17481 | TERQVKIWFQNRMRKWKKENNKDFPSSKCEQEELEKQKLE   |
| O75461 | LDELIKDCAQQLEFELTDDKENERLAYVTYQDIHSIQAFHEQ |
| P53347 | KTPAFPKLDSARHNILGIRNNVFCMARLLNHSLEIPEPTQT  |
| Q8MJ87 | KILLHNPQLWNLDSAPESNNRQSQSPSEKIDQLVYMGFDA   |
| Q8BIG7 | GVLAVLRVLWRGEVLQPQPRNKTVECVRNLNERILRDARVY  |
| Q6P8M1 | STHAGSKYINTSFPTKKKWENHCLKDRNEPCHIIQILEIM   |
| Q32LD7 | EGYLSGLAYRNDIQWSYPSSNEQVAEEKEEEMEATAAASLS  |
| Q2TBK4 | FGDHPQPQYEVNAWTEILYNLSERNRIRDVYLVTEDLK     |
| Q9CPV4 | VLGMQVLRHEEFEEGCKAACNGPYDGKWSKTMVGFGEEDH   |
| P01882 | TEATKAITTKKDIEGAMAPSNLTVNILTSTHPEMSSWLLC   |
| Q2T9R6 | ASPARDEKASYVAWGHSTVVNPWGEVLAKAGTEETIVYADI  |
| Q9DBJ6 | QDSNAFTRETLQEIFQRLSPNMTVTPHKKSMLGNGNYDVNV  |
| Q3T110 | KCGSCLSSLLIPLALWSIIVNILLYFPNGQASYASSNKLTN  |
| Q9UKR8 | DDYSTQWNLVMEKCLKCCGVNNYDFSGSSFEMTTGHTYFRS  |
| P13988 | DIAYDLELGLTLSEIRALTANGFIKFNIIKSFRAKCADLC   |
| Q9JM93 | RSGRRGSEKRSKRSSKSDASRNCSASRSQGHKAGSASGVEER |
| Q24JQ0 | IYAGSRALSRLAIPVFLTLHNVAEVIICGYQKCFQKEKTSP  |
| P12342 | FIVVPGCVTEACHDDPPSLRNAMFKVFRYEVGTMINCDCKT  |
| P47963 | GMILKPHFHKDWQQRVDTFWNPARKIRRRKARQAKARRIA   |
| P27548 | VEEEVNLHEDFVFIKKLKRCKEGESLSLLNCEEMRRQFED   |
| Q96PN8 | GKICLVMELAEGGDVFDVCLNGGPLPESRAKALFRQMV EAI |
| Q8NI29 | DANQTVLDKFSVAPDPIQWNNACLHVTHVFSNIKMGVRF    |
| Q96BZ8 | SGPVDLFRELLEEGKGVIRGNKEYEEERQEKERQEKALGI   |

|        |                                             |
|--------|---------------------------------------------|
| Q9BUT1 | VDTPSLQERIQARGNPEEARNDFLKRQKTGRFATAEETAML   |
| Q99KX1 | MLGMSGGFMDMFGMMNDMIGNMEHMAAGGNCQTFSSSTVIS   |
| P14190 | GNVLNDLTNGGTKLTIITVTGNKPILLGRKKEAFATPVTTGGV |
| Q60930 | KLDVKTKSCSGVEFSTSGSSNTDTGKVSGLTETKYKWCEYG   |
| Q60651 | KDWAWIDNRPSKLALNNTTKYNIRDGGCMFLSKTRLDNNYCD  |
| Q66JS6 | WEGEDEDEDVKNWDDDDDENKEEAEVKPEVKISEKKKIAE    |
| Q9QUK3 | FHITTATGFFFFENAVHLSNLFRTFDLFLVVHHLFAFLG     |
| Q8R4V2 | RPIANPNPGRQQLLEEFGWANSQKLRRLRLEERFGEIPFRDE  |
| P25786 | ARSQSARTYLERHMSEFMECNLNLVKHGLRALRETLPAEQ    |
| Q9Y3Y2 | LRGGRATRTLRRGGMSLRGQNLRRGGRAVAPRMGLRRGGVR   |
| Q9H3H9 | HEGKPEVACILEDKKLENEGNTENTGKRVEEPLKDKKEPES   |
| P51557 | TKLTWLLSIDLKGWLPKTIINQVLSQTQIEFANHLRKRLEA   |
| P04925 | VYYRPVDQYSNQNNFVHDCVNITIKQHTVTTTTKGENFTET   |
| Q13595 | YTTERDLREVFSTRYGPLSGVNVVYDQRTGRSRGFVVFYFER  |
| Q9D1J1 | TAVESVTDSSRYFVIRIEDGNRRRAFIGLGFDRGDAFDNF    |
| Q2LGB7 | MNSVNRQHKYNSVIPMRPLNNPLPRERTPFALRTINALEEE   |
| Q9DCK4 | PFPLLEPFTSAPTGPFLPYLNPAPFGLSPRRLRPFLLAATPG  |
| P10284 | RSRTAYTRQQVLELEKEFHYNRYLTRRRRVEIAHALCLSER   |
| P57784 | RIGEGLDQALPCLTELILTNNSLVELGDLDPASLKSILTYL   |
| P10629 | YGAAVAQNRISTPFYSPQENVVFSRSSRGPYDYGNSNFYQE   |
| P21107 | EKLELAEKKAADAEAEVASLNRRIQLVEEELDRAQERLATA   |
| Q95096 | REHLASLIRLTPQVKIWFQNHRYKMKRARAEGMEVTPLP     |
| P15949 | GGVLLDANWVLTAAHCYEEENKVS LGKNNLYEEEPQAHR    |
| P02662 | LARPKHPKHKQGLPQEVNLNLLRFFVAPFPEVFGKEKVNE    |
| Q8MJI9 | SQPSTGSSFARPYQSEDWYPNLHPTPAGHLACPPPPMLPL    |
| Q9UMY1 | KKRKLLPDTILEKLTTASQTNIKKSPGKVKVNLQKKNEDC    |
| Q9CQ83 | PEMSNGTLHHYFVPDGDYEENDDPEKQQLLFRVSDRRRCSQ   |
| Q3TQR0 | YCEAGVYTI FAILEYTVVLTNMAFHMTAWWDFGNKELLITS  |
| P05937 | GNGYIDENELDALLKDLCEKNKQDLINNITTYKKNIMALS    |
| P60201 | LTVVWLLVFACSAVPVYIYFNWTTTCQSIAPFSKTSASIGS   |
| Q28071 | PSIQVAENKILVKQSPMLLVNDNEVNLSCKYTYNLSKEFR    |
| Q9EP72 | LPKVVNTSDPDMRREMEQSMNMLNSHELDPVSEFMTRLFS    |
| Q9UIY3 | FEELLLAEAGDYGLRNDYHMLGQFLEFLKHKHSEHVQIL     |
| Q9ESP1 | RGLPVRCGQAVRLTHVLTGKNLHTHHFSPPLSNNQEVSAFG   |
| Q8CDY7 | CEQIHTRVRELNLPRYKLVCNVVLGPREGQGVHVVSALWD    |
| Q2HJ98 | LEEGDIILTGTGPKGVGPKENDEIQAGIHGVLMSKFKVERP   |
| Q9Z1L4 | VQYRTDERLNWIYYKDQTGNNRVFYGNSDRSSTVQNLRRPP   |
| O15266 | IASLAESASAAA VAAAAKSNKSNSS IADLRLKARKHAEAL  |
| A5D7C9 | ASFGMTLLGNFQLTNDIEIHNVTSLTFPGFGLTCWIQAAL    |
| Q7SIB3 | DLGLAGSCLARFSTMPFLYCNPGDVCYASRNDKSYWLSTT    |
| O14645 | KCEATEKRESERRQVEEKHNEEIQFLKRTNQQLKAQLEGI    |

|        |                                             |
|--------|---------------------------------------------|
| Q12981 | QLAKEQDKSEKQLLLQEVENHKKQMLSNQASWRKANLTCK    |
| O77512 | MADDFDHYTNTYQIYSKDLNQCESLATSDVINWKQHLQIQ    |
| P00551 | LYGKPDAPFLKHKGKGSVANDVTDEMVRNLWTEFMPPLPT    |
| Q61142 | YMYQLLDDYKEGDLRIMPDSNDSPPAEREPEGEVVDVSLVGKQ |
| P04224 | ANVAPEVTVLSRSPVNLGEPNIIICFIDKFSPPVVNVWTLR   |
| P82918 | IPVSPYEDEPWKYLDSEYHNRNGSRPVDYRRNHKGGIP      |
| Q5SS90 | SVSSKSTEDSKSNQDTETPENPETPEGSEKTPDAEVSSPSE   |
| E9Q9D5 | FSLPLYFVSAADGTNVVKLFNDAIRLAVAYKESSQDFMDEV   |
| Q32L00 | NQIEENTGHSFNLLCNLYRNEKDSVDWHSDEPSLGRCP      |
| Q8VI88 | HSMSTGLLYICVSKSCPSDNGEDNFKMWTIHPVFGVAKIS    |
| O14595 | AQHVGQSSSSTELAAYKEEANTIAKSDLQCLQYQFYQIPG    |
| A6QQA5 | GLQRDRSLAVSCSRLCSSAWNLCVFGILLGYPVPTFHEN     |
| A6H7B8 | NVALLVLTIVSSSEDFTHENAFIVFIASSLSHMLLTCILW    |
| Q9QXN5 | SLVYRPDVPPEMAKSKDSFRNYTSGPLLDVFTTYKLMHMH    |
| Q9JKM7 | FKDGAFLSGTFIATVGDIDSRNKVTVVDGARVKLQIWDTAGQ  |
| Q8TDU5 | ANHTLGFILFSWVLMFITTNNLLFIVPTPNRIGASLLFVT    |
| P08831 | KFMSLDTSETSKTSLKSFKENVVMVAASGKILKKRRLSLNQ   |
| Q9CQY7 | MNHRAPANGRYKPTCYEHAANCYTHAFLIVPAIVGSALLHR   |
| Q8BFR1 | CPHRDCWSTCSLSHDIHTPINVQVLKSRGLFGLNEGQLRIL   |
| Q32L49 | RDFRIFESNFVQVTRLGEVANKVTMGVAASSPALELPDLLL   |
| Q3U4G0 | HHTPEAIESYYQRYLNGVGNKGAAPVLELANEVYAPSLM     |
| Q2YDK0 | KDLCYKGHHWHEGCFNCTKCNHSLVEKPFPAKDERLLCSEC   |
| Q8C552 | TNIYRDQSFTTWLVATNTSTNDMIILQTLHWRMQLSIEVNP   |
| O14595 | LVLTKQGLVSKSSPKKPRGRNIFKALFCCFRAQHVGQSSSS   |
| Q99943 | LPTLWFCSPSAKYFFKMAFYNGWILFLAVLAIIPCAVRGRN   |
| Q8WTV1 | KHNAVPTVFAFQDPTQOVRENTDPASERGNASSSQKEKVLFP  |
| Q6UXP7 | QLLWLLKKSNNRYSLTIWTGKNDNYSVEDLLYIRDHFDKQV   |
| Q5QG29 | QTWQESKMACAAQNASLLKINNKNLEFIKQSRSYDYWLG     |
| P04394 | FTLIEVECLGACVNAVPMVQINDNYEDLTPKDIEEIIDELK   |
| Q5SX19 | LVGFLCVAVAVLTWGFRLRVWNSAERMRSPEQAGLPGAGSRA  |
| Q6ZQI3 | KLPILRSTPEDQIILYQTERYNEETFGEYVVPVKEEGDYVLVL |
| Q96G25 | NLEKISKEERESESGGLRPNKQTFNPTDTNALVAVAFGK     |
| Q6PER3 | LLARQGQDVAPPNPGDQIFNKSCLKIGTAVPQRTSPTGPK    |
| Q9H446 | FETDHNLDTSDIQFLEDAGNNVEVDESLEFQEMDDLELEDE   |
| Q8WV92 | KYLDQEKEDGKYHKQIKIEENATGFSYESLFREYLNETVTE   |
| A6QNY1 | LSNATVTAIEDWDSVQSGNRNVYGI IAAVAVLSISLAAGIL  |
| P28907 | SRDLCQDPTIKELESIISKRNIFSCCKNIYRPDKFLQCVKN   |
| Q64ET8 | QGSEPNPNKENSEETKLGKAGNSTAGSEPESSSYRENCRRK   |
| Q8BMB3 | EEICGAVVSVRFQEDIISIWNKATSDQATTARIRDTLRRVL   |
| P85094 | GRSRLQSVLLCGIETQACILNTALDLLHRGLQVHVVDACS    |
| P06345 | RWFRNGQEETVGVSSSTQLISNGDWTQVLVMLEMTPRRGEV   |

|        |                                              |
|--------|----------------------------------------------|
| Q3T169 | AVQISKRRKFVADGIFKAELNEFLTRELAEDGYSGVEVRVT    |
| P60334 | ESNPAEWALYAKFDQYRYTRNLVDQNGKFNLMILCWGEGH     |
| Q6PFX2 | FTIERWQIARCNKSKPQKFINDLMQVLYTNEYMATHSLTGA    |
| Q9D7V2 | LKKTLSIPIILSEKPLLFNGLNSIDSPESSETVDSSFCQEEEP  |
| Q8CG80 | SRTDAENLLRLCKEASYLVRNSETSKNDFSLSLKSQGFMH     |
| Q9UBX3 | SGLAGGFVGT PADLVNVRM QNDVKLPQGQRRNYAHALDGLY  |
| A6H759 | LKGMNLKTLTLYQNPLCQYNLYRLYIIYHLPGVELLDNRQ     |
| Q9QYM8 | LRLRAQTKQQLLEYKSMIDTNEEKTPEQIMQEKKQIEVKIEE   |
| Q4VAA2 | SRSGDGG SAGPAGKAITKDENEWKEFEQREVDYSGLRVQAM   |
| Q99JV5 | LSCGVSEWSETRPEFVRGYNHPCGWFCVPLKDSQSPSLLT     |
| Q9NVZ3 | NPDQGPKLDLGFKEGQTIKLNIANMKKKEGAGNPRVRPAS     |
| Q6PFG8 | HAANAVHPVHPILGGALSSGNASSPLSATS LPTIGTIRPPH   |
| Q8VI33 | IPATSTVQNVLINPSLIGSKNILITTNMVSQNTAESANALK    |
| Q2T9Y6 | KTQLEQLYQWAQVKPNSNQVNLASCCVMPDLTAFAKQFDI     |
| P59796 | YVCPGSGFVPSFQLFEKGDVNGEKEQKVFTFLKNSCPPTSD    |
| P20774 | AKYNKIKSRGIKANAFKKNLNLFLYLDHNALESVPLNLPE     |
| G3N131 | VSLAALKKALAAAGYDVEKNNSRIKGLKSLVKGKTLVQTK     |
| Q5PR19 | GPSFPARRYGAPRRLCFLPQNTGTPLRVLPSVFWSPSRKK     |
| Q9UNN8 | ADTQVTSGVVFTLQQLNAYNRTRYELREFLEDTCVQYVQK     |
| Q8C407 | VSSADAEDLSGSI AAPDVKLN LGVSGDFIKESTATTFLRQR  |
| P24699 | LKRCTTTNPNQRLPKVEILRNAI RYIESLQELLREQVENYY   |
| P31268 | QRSGYGAGAGAFAS TVPGLYNVNSPLYQSPFASGYGLGADA   |
| O94903 | KILSLCPEIKWHFIGHLQKQNVNKLMAVPNLFMLETVDSVK    |
| Q8NF86 | QSGSWVLVGVVSWGKGCALPNRPGVYTSVATYSPWIQARVS    |
| Q8BHC4 | KHTVVVYCDRDTQLARLMKRNNLNREDAEARINAQLPLKDK    |
| P53519 | NNAKDILYVKPYSEKKIDISNRIKKIKWAMIDDAGARTKL     |
| A0JLT2 | HDNSSLRLS LIEKPPILSSSFNPITGTMLAGFRLHTGPLPEQ  |
| Q9NRG1 | EAPDYGRGVVIMDDWPGYDLNLF TYPQHYYGDLEYVLI PHG  |
| P08166 | RRITGRLIHPQSGRSYHEEFNPPKEPMKDDITGEPLIRSD     |
| Q9NW81 | AAVAPEGNQKKKRTILQFLTNYFYDVEALRDYLLQREMYKV    |
| Q9TR36 | ADEDPALFQSVKTKRGLPGPNWKKELANNPDCPQMCA YKLV   |
| Q8N983 | FVEREVIDFARRNPGVVIYVNSRPCCVPRVVAEYLN GAVRE   |
| Q8TDQ7 | PESYHSYMWNFFFKHIDIDPNNAHILDGNAADLQAECDAFE    |
| P11911 | RKRWQNEKFGVDMPPDYEDENLYEGLNLDDCSMYEDISRGL    |
| Q2M2E3 | HVMSMGLLHFYKSRSCSDELENGKVTFFIFSTLM LFPINIWIF |
| Q06985 | RLTWEATPRSIHEGIATAIMNSDCLVFDTSIAQLFAENGL     |
| P49862 | HCGGVLVNERWVLTAAHCKMNEYTVHLGSDTLGDRRAQRIK    |
| O75792 | LFARMEDTDFVGWALDVLSPNLISTSM LGRVKYNLNSLSHD   |
| Q9D2Z4 | FLGSKGDKLVFVEEKAPAQENSYDCGMVICNTEALCQS LF    |
| P26715 | PKGKNNSILATEQEITYAELNLQKASQDFQGN DKTYHCKDL   |
| P51163 | SATASLVNKIGLDAEGAGSGNAEKLAEYICSKP SSELPLLF   |



|        |                                             |
|--------|---------------------------------------------|
| Q99020 | EYFGQFGEIEAIELPIDPKLNKRRGFVFITFKEEDPVKKVL   |
| Q9Y3B6 | RVPPVIVLENQGLRWVPKDKNLVMWRDWEESRQMVGALLED   |
| Q9BS40 | QRLKSMKEFLEAQNI PDNFGNVSPEMTLVLHLAWVACGYII  |
| C9JJ37 | LGLVVHGKAEPFSAALRSLVNNPRYSDCVFVVGQERQEVFA   |
| P58340 | FSEPFGRDLLSISDGRGRAHNRGRHNDGEDSLTHTDVSSFQ   |
| Q13103 | SYSSEEMIFGDMLGSHKWRNNYLFGLISDESISEQFYDRSL   |
| P59041 | TQAQIKAAAYRQSFLYHPDRNPGSAEAAERFTRVSEAYLVL   |
| A5PJK7 | TGLSRTTAHCFIPRPPSFPNPFLLAMPMAFAPPPIFGPFLP   |
| O08989 | FHQLILRVKDRESFPMILVANKVDLMHLRKVTRDQKEMAT    |
| Q3ZC27 | ARTVDENFDYLFKII LIGDSNVGKTCVVQHFKSGVYMEAQQ  |
| Q8R088 | TWNPFKLQYQLRNVREIAKNLVEKGILTTEKQNFLLFDMT    |
| A6NDU8 | QKVKELISFLSEPEILVKENNMHPKHNCNLLGDELLECLSWR  |
| P14415 | LDVIVNVSDTESWDQHVQKLNKFLPYNDSIQAQKNDVCRP    |
| P23946 | DPQACSHFRDFDHNLQLCVGNPRKTKSAFKGDSGGPLLCAG   |
| Q9HB71 | CKEKEKPSYDTETDPSEGLMNVLKKIYEDGDDMKRTINKA    |
| Q9BQI4 | KKVKRSLRQARKKGRHLELANQKLEKLAAGALPHINARGP    |
| Q9GZ2  | SEQEKLISLGGQTNLSVLQICNWFINARRLLPDMLRKDGKD   |
| Q9H2C2 | LIKVFVLTSNFQAIRVTLNINRKL SFLAVLSGLLLESIMVY  |
| Q8NGU1 | VMAVDRYVAVCNPLRYNI IMNSSTFIWVIVSWVLGFLSEI   |
| Q8IWD4 | ELVLWKPLPELLSDKPKPSSNTKNYTGESQAKHVAAGTAFP   |
| A6NC51 | VFLAVWATSGWVIVFAIAVTNRTVDLSKGFPPYISICGSFPP  |
| P59034 | RVPNGAFQHLPQLRELDLSHNAIEAIGPAAFSGLAGGLRLL   |
| O70338 | TNQRAE IHAACKAIMQAKAQNISKLVLYTDSMFTINGITNW  |
| Q3MHX1 | LTEPKEVERFLAQLSEFAATNQISLGPLRSIVKSLLLVPNG   |
| Q9P031 | RPGGIEARGEGVSTVGYRNKNVRQKTWRPNHPQAFVGSVRE   |
| P50135 | EIDLQILSKVQAQYPGVCINNEVVEPSAEQIAKYKELVAKT   |
| Q86XI6 | LALTMVKVFSEFDDPLDMFPNITELLDNIVSLTTAESESFV   |
| O70250 | QVKIWRRSFDTPPPMEKHNYYT SISKDRRYAGLKPEELP    |
| Q9TS87 | LMALGSLAVTKNDGHYRGDPNWMKKAQEHKREFTESQLQE    |
| Q5T0L3 | TALSPDCSLGDTQHGEKLRNCTIYRPWFSPYSYFVCADKE    |
| Q3UK78 | CPRCGNQVHETNPLEMLRLDNTLEE IIFKLVPLREQELQR   |
| A3KN05 | DEKGRKFVNILMCFWYLT SANIPSE AISGARVFQVKLGDQN |
| P50553 | ERNRVKLVNLGFATLREHVPGAANKKMSKVETLRSAYEYI    |
| P63321 | DLEDKRQVSVEEAKNRADQWNVNYVETSAKTRANVDKVFFD   |
| Q2HJ68 | TEEQRVELSLWDTSGSPYYDNVRPLCYSDSDAVLLCFDISR   |
| Q5BU09 | FGLQRPRQKQPVPNSDAVNLCPACMTTLC LDCQRHESYKT   |
| Q9JME9 | DTQEHHKAQALLRVLSRFAPPNMQA AEAVSHIQSSGPRRHGA |
| O54836 | QRRTRKEGSEFKMVATRRNMNPFVQSNSGPFYFNARSQRIPR  |
| Q99N84 | GGVPPQRTRKTCIRNNKVAGNPCPICRDHKLHVDFRNVKLL   |
| Q9UEE9 | VRVTKEVDATSKEAKSFFKQNEKEKPQANVPSALPSLPAGS   |
| P16402 | VSKGTLVQTKGTGASGSFKLNKKAASGEGKPKAKKAGAAKP   |

|        |                                             |
|--------|---------------------------------------------|
| Q8BRJ4 | GGTLLFALRYRVGTGREFDWNNNGRDYALLGPEHPAGAGAAE  |
| O75489 | LVDLTAVDVPTQRNRFEIVYNLLSLRFNSRIRVKTYTDELT   |
| Q96BH3 | NVVSDCMEDES NKLCPTTENMDKDGKWSFCADTRISALVP   |
| Q8NHY5 | LQFLEGQIHPPTALCNIWDNTLLQLVLVQEDVSLQYFIPA    |
| Q2TA29 | SDLRHLRAVPTDEARAFAEKNGLSFIETSALDYTNVEAAFQ   |
| P81125 | IAHYEQSADYKGEESNSANKCLLKVAGYAAQLEQYQKAI     |
| Q8VDK3 | GIFRVVKSEALAKMWGQRKKNDRMTYEKLSRALRYYYKTGI   |
| Q8MJ87 | LKILLHNPQLWWLNDAPESNNRQQSPSQEKIDQLVYMGFD    |
| Q99935 | PLYRPRWVPPSPPPYDSRLNSPLSLPFVPGRVPPSSFSRF    |
| P17667 | LKRCTTTNPNQRLPKVEILRNATRYIESLQELLREQVENYY   |
| O43709 | KPGTFDGCISISAVQWLCNANKKSENPAKRLYCFFASLFSV   |
| A2VDR2 | ACDRGHKELVTVLLQYRADINCQDNEGQTALHYAAACEFLD   |
| P50518 | VQIDQEAYLPEEIIAGGVEIYNGDRKIKVSNLTLESRLDLIAQ |
| Q6IB77 | TFPFLKSKILSPNGGKPKAINQEMFKLSSMDVTHAHLVKNF   |
| P11456 | DEYDNHCGREQRRRAVVMISCNRHTLADNFPVSEERGVQD    |
| Q149M0 | TYATLMLQDSARVRGNQDGNLRKEGHPAQSSLWRGAALSL    |
| P0C7M9 | FTRREPWIGLRRVGDFFHWVNGDPPDPTFTISGMGECVFN    |
| Q9GZN2 | LHRYNAYPSEQEKLSSGQTNLSVLQICNWFINARRRLPD     |
| O60725 | EYLVAVNNPKSLSDSFLLNHSLEYTVAALSSWLEFTLEN     |
| Q8WTV1 | QLTFHRFPFSRPELLKEWVLNIGRGNFKPKQHTVICSEHFR   |
| Q8BXK9 | DRDPEIELVKAGIDGESIGNCPFSQRLFMILWLKGVVFN     |
| Q6PE84 | TTQVDGVVYRYISAVSAVANVNDVHQATFLLAQTTLRNL     |
| P17483 | RSRTAYTRQVLELEKEFHYNRYLRRRRVEIAHALCLSER     |
| Q9D4V7 | DSGVGKSSLVHLLCHNQVLGNPSWTVGCSVDIRVHDYKEGT   |
| A2VE40 | TVPKPDLDAYVFLRVKERQENILVEPENDEQRDYVIDLEEG   |
| P04632 | SGTICSSSELPGAFAAGFHLNEHLYNMIIRRYDESIGNMDF   |
| Q6UW01 | RQTVQVSLMLNTWPVISAFAANDPDVTREAAATSSVLLPLDPG |
| Q91XE0 | AIDQDKFKLSSLDVVHAALVNKFWLFGGNSRQRFIERCIK    |
| Q9CY45 | LSSHTLAALQEFYAEQKQSVNPRGDDKYNVGVIEENWQLSQ   |
| Q9CR36 | ENSFAATRLFSKSKCIVHRMKNKDAMPQLDLDTMVKEQKQK   |
| P11456 | GREQRRRAVVMISCNRHTLADNFPVSEERGVQDCFYLFEM    |
| Q96BQ1 | WVFIGAKDLRGKSPFEQFLKNSPDTNKYEGWPELLEMEGCM   |
| Q60969 | KSKLPILQKHGITHIICIRQNIANFIKPNFQQLFRYLVL     |
| Q9D9R0 | RTRCGHVFCRSCIATSIKNNKWTCPYCRAYLPSEGVPATD    |
| Q04742 | HSFFSAQHRDPLHFYPWVLRNRFGRFQASDVPQDGLLH      |
| Q3SZX5 | EVLLEAQDMAVRDHNVFRSNLYIAESTSGRGQYLKRIYH     |
| Q2TA29 | TILTEIYRIVSQKQMSDRRENDMSPSNVVIHVPPTTENK     |
| P32885 | IQANVLKADKMDLRESQGWLNRYEGAAVGAALGAGITGYN    |
| Q6P5C5 | FRHCFVHNLCPFLFLAPSGRNLTPAELPAKQREQLLSICDA   |
| P14415 | YGGKFHVNYTQPLVAVKFLNVTNVEVNECRINAANIAT      |
| Q17QR4 | LGKQRAAPRPGPRSKEKKVNCNPKNQDEQEI PFRLREIMR   |

|        |                                            |
|--------|--------------------------------------------|
| Q8N511 | KPPRNPELVARLEKIKIQLANEYKRITRNVTCQDTRHGGT   |
| P29020 | SRSAETAANLQDPNQLYNELNLGRREYDVLEKKRARDPEM   |
| Q9Y508 | SVVCPICASMPWGDPNYRSANFREHIQRRHRFSYDTFVDYD  |
| P97461 | KHAFEIIHLLTGENPLQVLVNAIINSGPREDSTRIGRAGTV  |
| O14931 | SQPPEIRTLEGSSAFLPCSFNASQGRLAIGSVTWFREDEVVP |
| P52793 | MVEHQEYVACQPQSKDQVRWNCNRPSAKHGPEKLSEKFQRF  |
| Q9D7J9 | KQLPQDLRTAYFLASQAMVDNLALQDGGEGIEAFIQKRKPI  |
| Q9JL95 | LASVHSYSFNYQIQNLARKINQSIVWIGGILRGWFWKFCW   |
| P08218 | GGEEARPNSWPQVSLQYSSNGQWYHTCGGSLIANSWVLTA   |
| Q9D3N2 | LFLRGTLDEKMKYCFEVFDLNGDGFISKEEMFHMKNLLK    |
| Q3T040 | KPRRMLMPEKLSQELLEAFGNRGPVIKRKHDMHKMAEANRA  |
| Q9ESX4 | RRRRSFQDYTGQKITLEAVLNTTCKKCGCKGHFAKDCFMQP  |
| Q96MN5 | DHLLVENTERETFHLCSRLINGPYRRTVRALVFTLKHRAEI  |
| Q9DCK4 | TESFPSMQELVAHGKLYKPNRYFKCENCLLRFTRHRSFLK   |
| Q9BX73 | LGCPVSYLLLCGQAALLGNLLLLHCVSRSHSQNATAEPE    |
| Q2KJ29 | VTECLHTFCRCLVKYLEENNTCPTCRIVIHQSHPLQYIGH   |
| Q5EA91 | FFYHFSILQILGLVTEVNLNNMLCPAISDPFYGPWYRIWAS  |
| P62918 | IVCCLEEKPGDRGKLARASGNATVISHNPETKKTRVKLPS   |
| Q29438 | VKIESPCYPTSPCPCPCPCPCPCPCPCPCPCPCPCPCPCPC  |
| Q1RML4 | QHSTGDFQYSSDYKNYLAFINHRSHIRGNSNSYGVQPAEEP  |
| P10279 | GGWGQGGTHGWNKPSKPKTNMKHVAGAAAAGAVVGGGGY    |
| Q80X71 | TAQVQFSKTVIGKARLNNITNIGPLDMKQIDYTVPTVIAEE  |
| Q9BQR3 | VGQSWLQAGVISWGEGCARQNRPGVYIRVTAHNNWIHRIIP  |
| P09025 | LYGAQQEASVVQYPDCKSSANTNSSEGQGHNLQNSSPSLMF  |
| Q8BZJ7 | ELKDKPAFKDLYQFTFTFAKNPGQKGLDLEMAVAYWKLVL   |
| Q9CRA8 | TSVLAGVYGAPEVKVSKEIFNKATLEVILRPKIGLPGVAEK  |
| Q9UBY8 | DLFLVIHHLFAFLGFLGCLVNLQAGHYLAMTTLLEMSTPF   |
| Q6QHK4 | QSYNNSSESHSSARQLSRNITQHISCAFGKNEEGPWA      |
| P11226 | QFVDLTGNRLTYTNWNEGEPNAGSDEDCVLLKNGQWQNDV   |
| Q8BG17 | GRNKKKKRDRGDDRRPRLVLFNDEKREYLTGFHKKRVER    |
| Q9CWY9 | LQLELPLDLAVLQDIEQELCNEEKSIISEYEEDLEFDESCL  |
| B9EJG8 | LTFGFGTLTCWIQAALTLKVNINKEGRRVGI PRVILSASIT |
| O75494 | YSPRNSRPTGRPFRSRSHSDNDRFKHRNRSFSRSKSNRSR   |
| Q9JJK1 | QGPSAATREEIDWTTNELRNNLRSIEWDLEDLDETISIVEA  |
| Q3UBG2 | ATVHMDTFQVARIAYCTADHNVSPNIFAWVYREINDDL     |
| P97348 | DMARSVGAVAYLECSARLHDNVEAVFQEAEEVALSSRRHNF  |
| Q969W9 | PPYQGPCTLQLRDPEQQLELNRESVRAPPNRTIFDSDLMS   |
| Q9JJR9 | DNEKSLSLGLQTLRSLKCIINLDKHRLIVGKTDKEEIPFVE  |
| Q5T036 | EFWSGALSQPSSVPTPRPTPNRDSWRRAWAARGLHPRPSIL  |
| Q99KL7 | KMLDKYIYGAQGILLVYDITNYQSFENLEDWYSVVKTVSEE  |
| Q8BJN4 | ISWSPSEPCLEDYYHIMYRPNWNSIFSGYLRYNFHHEEKVP  |

|        |                                            |
|--------|--------------------------------------------|
| F1MIW6 | PYNYLNPLDSAWSSLKWFIINNKRKEFCLQSVGDVYSYQYIL |
| Q3UGC7 | LKKLQEEEDLELAKETFGVNNNTVYGIDAMNPFSSRDDFTFG |
| Q35417 | DCLSLCSLCAVRIQDGRPFINPLICSLECDLVPPEEWET    |
| Q3V0I2 | FCSFLRRRLKRRQEERLREQNLRALALEPLELEGLAGSPP   |
| Q8NG50 | NGCSKRIIKLQELSLEERENEDSMVPLPKQSLKFFCALEV   |
| Q9D819 | VLGILAMIDEGETDWKVIAINVDDPDAANYKDISDVERLKP  |
| Q9UF02 | GLSLVVGVLVLYISSINDEMLNRTKDAETYFNYKYGWSFAFA |
| Q99P58 | QSFLNVRNWMSQLQANAYCENPDIVLIGNKADLPDQREVNE  |
| Q0VCB1 | LLKNLRLVKRLYFGLRVLPNVLNLFHQSLTEDQKLVDEG    |
| Q8C4A0 | LLYGVTGGIRETLGVNVVHNSTSTGQAVAVELVLTQLVL    |
| A6NJY1 | SNIVGISVSTLSLALCVRILNIYLLMCFAGFSFKEKIFIAL  |
| Q5SXG7 | GTSFLVAFCLRVEPFTFPDNTGVNNVFRCSGDGVELEGG    |
| Q9EST4 | PAVSVGNVQLAIDLIIISTLNMCKIGYFYTDCLVPMVGNP   |
| Q5TBK1 | QKRARKAMRNGISPIIIDNTNLHAWEMKPYAVMALENNYEV  |
| Q17QR7 | EVDEKPFVQVCGKTFNNTSNLRTHQRIHTGEKPYQCSECG   |
| P27814 | REKCCVFIQENLNKTTDCSVNLECPQDWLLHRDKCFHVSQV  |
| Q8IVN8 | PFAMNSVSLRCSGDGLSDGNQTLHWQAIGNPRCQGTWKKV   |
| Q91YQ1 | YRDASACVIMFDVTNATTFSNSQRWKQDLDSKLTLPSEGPV  |
| Q5ND56 | PFMYWSYGQKGLSLLQVPFNIPLHCNMANAVLISPQLYWF   |
| Q8IUW5 | VNENSDTVGQIVHYIMKNEANADVLKAMVADNSLYDPESPV  |
| Q9UIV1 | QLLR CNVDLLKIIQLGLTFMNEQGEYPPGTSTWQFNKFNL  |
| P26892 | TAGLLEYQIYLDYLDQNEYEGNQENVRDLRKNIRTLIQILKQ |
| Q3SX00 | QGNTALHLHCGHVDTIQFLVSNGLKIDICNHQGATPLVLAKR |
| Q5E997 | SFKFDHLRKEATDPRPYEAENAIESWRTSVETALRAYVKEH  |
| Q3SYZ9 | DALAAGRLPDVLPAPQYPWQSNMAMNMLPPNHSDFLLEPP   |
| Q17QK8 | AGTLGDVSKRWVLDTPTEVNNYWTLNLTSTLCLTSSILQA   |
| Q8R3G9 | LQVAAGILGAAFKPEYNRIINETLYENAKLLSDNTDEAKDF  |
| Q567V2 | PAAQFVNFLFVPPQFRVTYINGLTLGWDTYLSYLKYSFVP   |
| Q43482 | VVLEAPFLVGIIEGSLKGSTYNLLFCGSCGIPVGFHLYSTHA |
| Q08738 | QHDVPVPLDMVDHQTDKLDNVTQVDAASVYTLPAAGDFLM   |
| A3KN05 | AKETLHVLKEKVTSLPDNHKNALAADIDEIVYTSTGDISIY  |
| P19639 | LLEYTDSSYEKRYVMGDAPNFDRSQWLSEKFNGLDFPNL    |
| Q810N5 | LPMNLNEESCIKDFEQMIRNFKEMQLMVDGKHKMQKREPL   |
| Q9R0Q4 | RWGGRSAENPPSGSVRKTRKNKQKAPGNGDGGSTSEVPQPP  |
| Q9CQG0 | QRKQLNDTLDAIKDSTQRVENQVFHMWRFYNYARMRVADF   |
| Q8N2C3 | CLSSNDISCLKGVHLCQVLMNHKVFEPVGMKKLFKKEKELE  |
| Q03401 | VLFFLAAVLPPSLLQDSSQENRLEKLSSTTKMSVQEEIVSKH |
| Q9QYI5 | VSTSTTFVQGRRIITRRIMENGQERVEEEDGQLKSVSING   |
| Q9D1D6 | ENPKVKQKALIRQREVVDLYNGMCLQGAPGVPRDGSPPGAN  |
| Q9UPY8 | KNPPSARNGGHETDAQILELNQQLVDLKLTVDGLEKERDFY  |
| Q9NYV7 | SRFCLQWASMLNFCSYFNLNYVLCNLTITWEFFNILTFWL   |

|        |                                             |
|--------|---------------------------------------------|
| E9Q9D5 | GTWYAELEFRPEIPCILVANKIDADIQMTQKNFSFAKKFS    |
| Q2HXU8 | STKELDQINGSKGCAYFQKGNIIYISRCSAEIFWICEKTAAP  |
| A6NJW4 | GLSAVPSGIPNDTRKLYLDANQLASVPAGAFQHLVPLEELD   |
| Q8K2W6 | VPDRCFSHLQPSLLQRAKPSNYLLDRKTTDKLKKKKRRRKR   |
| P47741 | SGYKLGVDVCVPCPPGHFSPGNNQACKPWTNCTLSGKQTRHP  |
| Q9BUJ0 | LQLLSQRGYRAVALDLPFGNSAPSKEASTEAGRAALLERA    |
| Q5SPV6 | QHPKPCVDRRRVNYAKFIHTNARTYNEVPYIDNKGPEKQR    |
| P35625 | GDWGAEACTCSPSPHQDAFCNSDIVIRAKVVGKKLVKEGPF   |
| P61294 | EQRAKELSVMFIE TSAKTGYNVKQLFRRVASALPGMENVQE  |
| Q3LI83 | YVCNCHIPTRNASKACQTLRNGSNCFGQLNCLSKSFQTLNH   |
| Q02738 | EVWDDQKDFICNTRKQPGCPNVYDEFFVSHVRLWALQLI     |
| Q9NZ63 | KKDSETS FVPTNMAVNYVQHNRFYHEELNAPIRRNKEEPA   |
| Q58DU5 | VAGLLADARSLADIAREEASNFRSNFGYNIPLKHLADRVAM   |
| P62258 | VIGARRASWRISSIEQKEENKGGEDKLMIREYRQMVETE     |
| Q91XQ6 | ILLTLKGYLISCVWSCYRYINGRNSDVLVYVTSNDTTVLL    |
| Q3T0X7 | YIEIKKGVTEDDGRPIYALVNLATTSVSKMASDFAENELDL   |
| P25942 | TEFTETECLPCGESEFLDTWNRETHCHQHXYCDPNLGLRVQ   |
| Q13795 | AFEKVVTSEALCGVPVLVLANQDVETCLSIPIKTAFSDC     |
| Q9ESG4 | NYTLPAAEVQSAIRKNRNRINSAFFLDDHTLEFLKIPSTLA   |
| P11403 | VRSGAGDYLLGLKRLRRLYCNVIGIFHLQVLPDGRIGGVHA   |
| P28067 | RYTAIAYWVPRNALPSDLENVLCGVAFGVLGIIVGIVL      |
| P0C672 | LIGMGSSTVLFCLLGYIGIHNEIRWLLIVYAVLITWTFVAVQ  |
| Q6QRN6 | PPTSLSRSPPTVLVICGPGNNGDGLV CARHLKLFQYPTI    |
| Q62283 | FRHEIKDTFLRITYTDAMQNYNGNDERSRAVDHVQRSLSCCG  |
| Q8N144 | ELGHLLWKGRPRAGERDNRNRAHEEAQKLLPPPPPPPPPP    |
| P41732 | HEIKDTFLRITYTDAMQTYNGNDERSRAVDHVQRSLSCCGVQ  |
| P01193 | TENPRKYVMGHRFRWDRFGFRNSSSAGSAAQRRAEAEAVWGD  |
| Q9D1C8 | AMERIKEDRPITIKDDKGNLNRCIADVVSFLFITVMDKLRLE  |
| A5PJN1 | GRTGGLGTRGRVSPVEFRKNVKKRTWRPNHLQAFAGSVRE    |
| Q60817 | QLAAAEKFKVQGEAVSNIQENTQTPTVQESEEEEEVEDETV   |
| P53516 | GVLSVAGLLSAGAYAAGGEGNMSASATETNARVFSLHLGAT   |
| P06753 | EKLELAEKKAADAEAEVASLNRRIQLVEEELDRAQERLATA   |
| P19075 | FLFWLCGILILALAIWVRVSNDSQAI FGSSEVVGSSSYVAVD |
| Q5JQF8 | RPVRI MWSQRDP SLRKSGVGNVFIKNLGTIDNKALYNIFS  |
| P02253 | VSKGTLVQTKGTGASGSFKLNKKAATGEAKPKAKKAGAAKP   |
| Q16890 | KKFGDMSYSIRHSISMPAMRNSPTFKSFEERVETTVTSLKT   |
| F6YCR7 | RGELARTLNVPEVKVWVFTNRRRAKQRKIERREMLRNI PPG  |
| Q9P2Z0 | AAASQITCENELVQTQPHADNPSNTVTSVPTHCEEGPVHKS   |
| Q9BZX2 | EEFCLPTKKYADVII PRGADNLVA INLIVQHIDILNGGPS  |
| Q99LV7 | RERNLTEAVMLSESFNIEAPNYLSNESAVLIYARQDAQCID   |
| Q61334 | EKLLGLRNDNAEEHLEAENKLI ESKENLKTTELKASDA     |

|        |                                             |
|--------|---------------------------------------------|
| Q5SYL1 | GAVSCRQGGHTRVSAPQKGDNIQGHVWQGWKSLWCGMGTIR   |
| O75792 | DVLSFNLISTSMLGRVKYNLNSLSHDTATGLIQYALDQGVN   |
| Q9MZ13 | LTFTQKWNTDNTLGTEISWENKLAEGKLTLDITFVPNTGK    |
| Q8C0Y1 | GNLPKESVKILRDWLYLHRYNAYPSEQEKLSSLGQTNLSVL   |
| Q9CQY7 | HMCDRMVIYFFTAASYAPWLNRELGLASHMRWF IWLMAA    |
| Q6UXN8 | NRESCYYVSEIWSIWHTSQENCLKEGSTLLQIESKEEMDFI   |
| A7E3W5 | TFLWFVGFCLTNQWAATKKNVDVHEADSARAAITFSFFSI    |
| Q96BD6 | VG VATADAPLHSVGYTTLVGNHESWGWDLGRNRLYHDGKN   |
| P08831 | LKNCYSENEYSSSIDHLSLNQKSFYDASYEPLREDQMNKF    |
| Q9D110 | LSTGGDLIFLPLGFGDKGNRLGRGKGYDYTYLKRCVQHQ     |
| Q8N1N2 | AHSRCLQSESCNTQVKEYCRNDWSMWKVF LACLACVIMTA   |
| Q3SZ45 | TVCERGTPIRCGQPIRLTHVNTGRNLHSHHFTSPLSGNQEY   |
| Q8VE70 | NPGLTQDIIMKILEKKSVEVNFTESELLRMAADDVEEYMIER  |
| Q96PU9 | FRVDSTPGPAAYMLPMVMGPNTVGKASQPSFSIKGRSKLGG   |
| Q6ZW22 | PIDYPYSPPTFRFLTKMWHPNYIYENGVCISILHPPVDDPQ   |
| Q9NYN1 | RALPHQAPL TARHGLASCTFNLTSTINLKEMPTVAQAKLVT  |
| P13725 | DLERSGLNIEDLEKIQMARPNILGLRNNIYCMAQLLDNSDT   |
| Q9BX0  | LGKQFCSEFKIRTKTQSFRCRNEYSLTGLCNRSSCPLANSQY  |
| Q8R1J3 | LRNDSQAKRKKKKKKEYLNEDVNGFMEYLYKQNSQVLHNG    |
| Q28105 | IQQLPQEPDQSWALTKIYLNRYLEEFVGLVQVVHQERGVY    |
| P62242 | ALPLGRKKGAKLTPEEEEEILNKKRSKKIKKKYDERKKNKI   |
| Q6UXN2 | TSSKPWTAVQKSHYT IWDKPNAGFFNITMIQLTQNDSGFYW  |
| Q9ERE7 | SILKMTKKGKTLMMFVTVSGNPTEKETEEITSLWQGS LFNA  |
| P0DMS9 | MDEKVKRSFVLDTASAI CNYNAHYKNHPKYWCRGYFRDYCN  |
| P13634 | GVLKMGVPANPSLQKVL DALNSVKTGKRAPFTNFDPSLL    |
| Q9NPI7 | EYICGSHGVEHRVYKHFSSDNSTSTHQASHKQIHQKRKRHP   |
| Q0V882 | LVVMCGFVLFDTQLIIEKAENGDKDYIWHCVDLFLDFVTLF   |
| O75628 | RACAVVFDCKFIETSATLQHNVAELFEGVVRQLRLRRRDSA   |
| Q32PI6 | YRRWGDVLFVLDLEHEDMPQNVAATSGLKT FNLI PAIGLN  |
| Q7Z3H0 | LDLERRDQRGLTALMKAAMRNRCVATLLMAGADLTAVDP     |
| B6A8R8 | AKAPYRASGPSNLLEISVIDNHL PQDLAASTFPPQLTATSP  |
| Q6UWM5 | LGASTAIFVCNYGPAGNFANMPYPYVRGESC SCSKEEKCX   |
| Q13162 | INTEVVACSVDSQFTHLAWINTPRRQGG LGPIRIPLLSDLT  |
| Q9CYX7 | AAESSAGTNSGWADAMAKILNKKTPKSKATILT KNKELEKE  |
| P17041 | ERLHTGQKPYECAICQRSFRNQSNLAVHRRVHSGEKPYRCD   |
| Q2KJF9 | QHDQRGLGGI LLEDIEEGLPNSQKAVKALGDQILFVNRPDK  |
| H3BS89 | PLRASRSLDRWEGKLLRARNRRQLFAMSPADEC SRQYNST   |
| P15428 | RKVVDHFGRDLILVNNAGVNNKNEKWEKTLQINLVSVISGTY  |
| P49798 | VVICQRVSQEEVKKWAESLENLISHECGLAAFKAFKSEYS    |
| Q9D1R1 | AKFRSP I ISEIIEKKFEHYRNDKTLNIHGTLVFGTSSSLSG |
| Q3UHX8 | LAAGTPHGITDILSRPVATPNSLSSGYPHVAGFGLSSQG     |

|        |                                             |
|--------|---------------------------------------------|
| Q8BFR6 | LDHTLERWITKEECPLYNGGNVILEYLNDEEQFLKNVDSYL   |
| Q99811 | REELARRVNLSEARVQVWFQNRRAKFRRNERAMLASRSASL   |
| Q5UCC4 | EHSFEIDDSANFRKRGSLLWNQQDGTLSLSQRQLSEERGR    |
| Q9JJV3 | AFILSSGGLLTFIILLKNQINLLGFTLMFWCEFTASFLFFL   |
| Q6P050 | EDWLKSAFQRSICSRHESLVNDFLLRVCDRLSAVRSPPRRE   |
| Q99895 | VCAGGDGVISACNGDSGGPLNCQLENGSWEVFGIVSFGSRR   |
| Q9H019 | SDTRPLRHTWKPSPLIVMQRNASVFNLRGSEERLLALKKPA   |
| P52907 | PVKIEGYEDQVLITEHGD LGNSRFLDPRNKISFKFDHLRKE  |
| P08263 | AGVEFEEKFIKSAEDLDKLRNDGYLMFQQVPMVEIDGMKLV   |
| A6NCQ9 | TLAVPVGLPSVPPPLDSLGHNTPLAASSPAWRPPPGQARPPG  |
| Q86TN4 | RKQRFALQLGDPSTGLLIRANQGHSLQVFKLELMPLPQA     |
| Q5UBV8 | ALHWEHDLGMAFTKNGMKYINKSLVIPESGDYFIYSQITFR   |
| P60202 | TSASIGSLCADARMYGVLPWNAFPGKVCGSNLLSICKTAEF   |
| Q9H741 | TFKQEERAVRDRNLLQVHDHNQPIPWKQVFN LGNSSRPSNQ  |
| P59025 | FYEKMEEA KPADSWDLIIDPNLKHNVLSFGWKQYLELHAGS  |
| Q9UGN4 | YSTVASPREELHYASVVFDSTNRIAAQRPEEEEPDSYSV     |
| P07992 | QALKPGAKSNSIIVSPRQRGNPVLKFVRNVPWEFGDVI PDY  |
| Q96HF1 | KSVLWLKDSLQCTCEEMNDINAPYLVMGQKQGGELVITSVK   |
| Q3T0U1 | ADVTLLEGQVYPGKGGGSKEKNQTKQEKGKKKKERDLKPRAS  |
| O88822 | IYPFVFP LHKVVYLGLYVLNVWVTISIHGD FRVPQILRPF  |
| Q3UWA4 | SGILSCPVCRKPCSEGLGDNYICHTHQKRVRRFCEASGHL    |
| Q5T9Z0 | SRFMYPKEQH LTMFILLTLNGCVD FMSKNVLPQRVCGLEK  |
| Q6P1S2 | KTVLVKGLKYDSKIYWTVHRNLLKAELTALKKGEGIWKEDS   |
| Q9CZE3 | FETSAKDNINIDEATRFLVENMLANQQSFPSEEIDLDRIKL   |
| Q969T7 | LQGFKGQLIHTYKNSSACENSGYFQQLLEGKTNVILLGDSI   |
| Q17QQ4 | DQSFTSPPPRDFLLDIARQRNQTPLPLIKPYSGPRLPPDRY   |
| Q8NBL3 | RRHKESCERSRAGADPPDQKNRLMPLSHLPLRDS PPLGRRL  |
| O95456 | LSSFVMNSGVWEEVGCAKLWNEWCR TTDTHLSSTEAF CVF  |
| Q52LC2 | YNKLSIQSWFSLRRVEIISNNSIQAVFNPTGVYAPSGYSYR   |
| Q64317 | SALANGRALSAGSPPVPPGWNPNSSSGKSGSSAGSYVPSY    |
| P13727 | FSQAWFTCRRCYRGNLVS IHNFNIN YRIQCSVSALNQGQVW |
| Q86XK3 | VESEENDQTFSEK PASSTEENCLEFQESFKHIDSEFEENTN  |
| P09428 | FVQGEERDNKIPVALGIKDKNLYLSCVKKGDTPTLQLEEV D  |
| Q9P0I2 | RENGKYIPKQSF LTRKYYFNNPEDGFFKTKRKKVPPSPMT   |
| P55061 | LFLGGILMSALSLLLSSLGNVFFGS IWLFOANLYVGLVVM   |
| Q9D1J3 | KQDLINRLQAYLEDHAE EEEANEEDVLGDETEEEEPKPIELP |
| Q9QVN7 | DKMVT RKN AEGAMDLLRELKNMPITLHLLQSTRVGMSVNAL |
| P51150 | IDLENRQVATKRAQAWCYSKNNI PYFETS AKEAINVEQAFQ |
| Q0VD50 | AGNDAQKF IYESDVLWKHQNNIHLVNEWITNDISSTKIRRA  |
| O00142 | FDWILRNMDVSVDLIVYLRTNPETCYQLKKRCREEEKVIP    |
| Q9NY35 | ALFRYNGTVGLWRR CITIPKNMHWYSPPERTESFDVVTKCV  |

|        |                                               |
|--------|-----------------------------------------------|
| Q8N1Q1 | QKITDTLDSIKEKQKQTRFTNFDLLSLLPPSWDYWTYPGSL     |
| Q5SYH2 | TLSDLGKQVRSVKALVVTFIFNFIIITVAAAFVCTYLGSQYVF   |
| Q9DCS2 | KAVLITYGFPYAVNGKISPQSNVDFDLTLRCRNPEWGLRDTV    |
| P32850 | NKVRSKLKSIEQSIQE EGLNRSSADLRIRKTQHSTLSRKF     |
| Q8C4B4 | LLALDTIRPEHVLRNLNRVTENYLCKPEDNVYSIDFTRFKIR    |
| Q9CRA0 | SGSPKGD LINLRSAGNMSTYNCQLLKACSKKCAPPVVIGC     |
| Q8VIM0 | TDERNVTYQKSSRYQLKGD LNKGDVSLI IKNVTLDDHGTYC   |
| Q07011 | DICRQCKGVFRTRKECSSTNAECDCTPGFHCLGAGCSMCE      |
| Q5TFG8 | EPTVTSAVGALLQNRVLVATNEVPTKSGLAMDPASGAKLRQ     |
| Q9NXF7 | PPFQKPLTSPSRLSRDHATLNGALQFATKQLSRTLSRATPI     |
| A6QPL2 | WAAVIGLFCRQYDI IKDNDN NNPKEKKGKPEQSPQGRFVG    |
| Q96GD0 | GRQALVVGKPSPYMFECITENF SIDPARTLMVGDRL ETDIL   |
| Q6BDI9 | KEYLGF EYPPSKLCPAANTLNEIFLIHFITFCQEKGVD EWL   |
| P52483 | SSDYFFKPPKVTFRTRIYHCNINSQGVICLDILKDNWSPAL     |
| Q9D309 | RDKYAKICFEDEV LIG EKTGNVARGINI AVVNYETGKVIAT  |
| Q9H7E9 | VSSARNPSTVCLCPEQPTCSNADSR AHLPLGDEGGT ASKQK   |
| O14818 | DGTPRLYQTDPSGTYHAWKANAI GRGAKSVREFLEKNY TDE   |
| Q9Y399 | AVRDAAKMNIPTVGI VDTNCNPLITYPVPGNDDSP LAVHL    |
| Q91ZX1 | VDGSPLT LSFMYKWSKGE PNNLGEEDCAEF RDDGWN DTKCT |
| P05837 | YRNSPVV CVRNKNR KILYANGAFIELFSREDKPLSGESYI    |
| P08962 | TDWEKIPSM SKNRVPDSCCINVTVGC GINFNEKA IHKEGCV  |
| Q9D7X1 | RHVLNFLRNGELLLPEGFRENQLLAQEAEFFQLKGLAE EVK    |
| Q8IXF9 | LTLFLFLFLAHGVTLDGASANPTVSLQEFLMAEQSLPG TLL    |
| Q9NP50 | SGNRKSNQISKLQKEFKRHNSDAHSTSSASPAQSPCYSN       |
| Q9ULN7 | MKALMNEKAQAALVEFVEDVNHAAI PREIPGKDG VWRVLWK   |
| Q92956 | GGTESQD TLCQNCPPGTFSPNGTLEECQHQT KCSWLVTKAG   |
| Q9BQT8 | LTATLGRHG VFNMVYFGFY NVKNMIPV NKDFILEFWRKFG   |
| Q9QZ23 | RIEGVKS VFFGPDFITVTKENEELDWNLLKPD IYATIM DFF  |
| Q5E9V3 | SGSQQAPFTPPNTPDPRSPPNPENIAPGYSGPLKEIPPERF     |
| O88456 | SGTIGSHELPGAFEAGFHLNEHLYSMI IRRYADESGNMDF     |
| O43736 | MPKSTIYRGEMCFDSEDPANSLRGGEPNFLPVTEEADIRE      |
| Q16740 | QATDIAIQAE EIMK LKKQLYNIYAKHTKQSLQVIESAMERD   |
| Q9BXJ4 | YSFRGYQGPPGPPGPPGIPGNHGNNGNNGATGHEGAKGEKG     |
| A1E960 | GLIGASSAPLISQRLLSASNSHELLLN LNNGQLLPLQFQG     |
| P02702 | CKEDCQSWWEDCRTSYTCKSNWHKGWNWTS GYNQCPVKAAC    |
| Q8WWA1 | TDFHKQDGKAGLFSQEYERNKSSSSSSSSSSSSSSSSSSSS     |
| Q14406 | FCFSDS IPTSSNMEETQQKSNLELLHISLLLIESRLEPVRF    |
| Q6UE05 | VCQKSHCFRLGRQLSKALQVNCVVRKLLVQLRRLYWWWVETM    |
| Q9NQ60 | EKNGNYYKDIKQYVFTTQNPNGTESEISVRATTDLNFALKN     |
| Q60948 | FDGDFARKKTKTAGLVRKGPNNRSSHNELEKHRRAKLRLYL     |
| Q62422 | KGRTGLIPSNYVAEQAESIDNPLHEAAKRG NLSWLRECLDN    |



|        |                                             |
|--------|---------------------------------------------|
| Q3T0C2 | MGPIKDMMKYYGILDPSMIANGLITLIEDDALNGAIMKITT   |
| Q01105 | KEQQEAIEHIDEVQNEIDRLNEQASEEILKVEQKYNKLRQP   |
| Q9ZIS7 | KASMEKHLHALNMLSGDPHRGNFIVSKDGVRIIDLSGKSCTA  |
| Q2KI22 | SMVAAGSVAAAQGLHLGSANGFLSYHRLTRFLSKVIRCDP    |
| Q2KIV9 | GTPGTKEKGLPGLVSHLNENGEKGDPGFPGMPGKVGPKGP    |
| Q3T186 | GSGSTIVHAVQRIAEERVEQENLKLVCIPTSFQARQLILQYG  |
| Q91XR9 | WKWMKVQPKGRGMLGNAIKWNFTKFLIDKNGCEVKRYGPME   |
| Q3SZW3 | VIIILINAILCKAQAYRHILFNTRKINMHGKLCVFCLLCEAYL |
| Q3KNM2 | ILNSIFPGIGCPVPRIPAEANPLADHVSAIRILCGALVFPT   |
| O00560 | SPASLVGLRFGDQVLQINGENCAGWSSDKAHKVLKQAFGEK   |
| Q8BQM7 | QLLDCLSDSFQVTNKLTVLNLTHLGCRLAFIEMKSDGTIKE   |
| P06798 | QVKIWFQNRMRKWKDHLKLPNTKMRSSNTASAPAGPPGKAQ   |
| E9Q7Y3 | AAGPARELAGSVESLPSFPWNSPRVTPKTALESQAGSRRAG   |
| P63013 | QVWFQNRRAKFRRNERRAMLANKNASLLKSYSGDVTAVEQPI  |
| Q5E988 | KAQCPIVERLTVNSMMHGRNNGKLMVTVRIVKHAPEIIHLL   |
| Q8TF63 | RKSLKSSDPWHPPSLSPNSWNRQAGFRWSSHILISLSLTCS   |
| P20160 | GYDPQQNLNDLMLLQLDREANLTSSVTIILPLPLQNAVTEAG  |
| P14190 | VDGIPIHIAFTDYEGASVVLRNPDGETNKKGLAYFVLPMKNA  |
| Q8N5P1 | PEESTKKEGVKDTPQAAKQKNKNLKAGHKNGKQKMKRKP     |
| P61026 | MLVYDITNGKSFENISKWLRNIDEHANEDVERMLLGNKCDM   |
| P59539 | AVSRVGLLWVLLLNWYSTVLNPAFCSVELRTTAYNIWAVTG   |
| A8MT33 | IKLQKEGSLEPQIEDLISRINDLQQAKKKSSEELRETHSLW   |
| Q8TBZ9 | KGSKRPLPLELLFLQVPRSNYLFHQEEKQRLHLKFLDR      |
| Q86XT9 | VPGILPSSQPPISCSSEEGAGNATLSPRMGEECVSVWSHEGL  |
| Q8C3M9 | KKATGQNGDPVKGHTHTPATNISPTPVLSSAQPFHSSTVMW   |
| Q9Z205 | ADASASSLQGSFLKHSTTLTNRQRGNEVSALPATLDSLSIH   |
| Q5BK9  | EQLEKKKKGSKALAEFEEKMNENWKKELEKHREKLLSGSES   |
| P53519 | MPPIEKSTKINRKEGRTDSINISIRGCILYRPAVSPV       |
| Q6PF2  | NQVLRKRKRRTETANSENANSALEKQRPYSGNAFLPGE      |
| P00403 | SYMLPPLFLEPGDLRLLDVDRVLPPIEAPIRMMITSQDVL    |
| Q9NRH1 | KKIDEAKDERLCENNAEFNKNSKSHSGIDCSYVECCRTQE    |
| Q13126 | KYVDTFPGKPSDALILGKIKNVDCVLLARHGRQHTIMPSKV   |
| Q3ZCC4 | RGAPVPVPPKRTVKRNI PKLNAERLISERGLPALRHVFEKA  |
| P37980 | IPIYADKEVFHMVVEVPRWSNAKMEIATKDPLNPIKQDVKK   |
| Q9JL10 | SMYDSELWLPASEGLKPGPENGAKEEPELDEAELDYLMD     |
| Q14201 | MYRGNHQNHYPPVPPFGYPNQGRKNKPYRPIPTWVPPPG     |
| Q17R16 | LLSMVLILGCITCFALFFFCNTATVYKICAWMQLLAALCLV   |
| P52623 | EQKAKALQGQYNFDHPDAFDNDLMHKT LKNIVEGKTVEVPT  |
| O75832 | EERVEEAKLLVSQGASIYIENKEEKTPLQVAKGGLGLIKR    |
| Q58DF6 | CGYVCWFRPAYKAFRSDSSFNMAFFFFIFGAQFILTIIQAV   |
| P02970 | IAFTDYEGASVKLRNTDGETNKGGLAYFVLPMKNAEGTKVGS  |

|        |                                            |
|--------|--------------------------------------------|
| Q5E982 | EPPRYMSVNQAAQQLLEIVQNQRIRGEEPAVTEETLCVGLA  |
| Q2KIX7 | GSMNIAGFWILAQFVLLLVANVKSSADSELCPRGARGPPG   |
| Q96BD8 | EINKAVISKYKILHQPKKSMNSVTRNLYHRFIDEETKDTKG  |
| O95416 | RAQHMKEHPDYKYRPRRKPNLLKKDRYVFPPLPYLGDTDPL  |
| Q61200 | SFNCRIEYEKVDKATKNTLCNYDPSKTCYQEQTQSHVSWLC  |
| O15260 | SFVFLNLLGQLTGCVLVLRSNFVQYACFGLFGI IALQTIAY |
| Q9D176 | RGEDETVQAAYLGLKGHNHNSSSVGGNGGPGSGGGKPG     |
| A0PG75 | TLRSCTLRITDNSGREVITVNRPLRCNSCWCPCYLQELEIQ  |
| Q3ZBY3 | SGYIEANELKGFSLDLKKANRPYDEPKLQEYQTITLRMFD   |
| Q8R1L4 | GKSQILFALVFTTRYLDLFSNFISYNTVMKVVFLLCAYVT   |
| Q2YDK0 | IESGSKDLCYKGHHWHEGCFNCTKCNHSLVEKPFPAKDERL  |
| P01139 | VNINNSVFRQYFFETKCRASNPVESGCRGIDSKHWNYSCTT  |
| Q2HJB9 | GAMETQSEPELELDDVVITNPHIEAILENEDWIEDASGLM   |
| A7E3W5 | CIFGEGYSNTHDSQQQYCVFNREDACRYGSAIGVLAFLAS   |
| Q9EP73 | PQHSNFRGRASLPKDQLLKGNAALQITDVKLQDAGVYCCII  |
| P40293 | MKFGADIQDDYEDENLYEGLNLDDCSMYEDISRGLQGTQD   |
| P35288 | HSSSNKIGVFNASVGSGLGQNSSSLNGGDVINLRPNKQRTK  |
| Q4G0S7 | HNI IKGLQQTIEYQQNLKGENEQLKISADLIKEKLSHEQE  |
| Q9P2Z0 | VICSDHFAPACFDVSSVIQKNLRFSQLRLRVAGAVPTLHRV  |
| P61587 | SENSVRDI FHVATLACVNKTNKNVKNRKSQRATKRISHMPS |
| Q53TN4 | HPNGGTEQGARGSMPAYSGNNMDKSDSELNSEVAARKRNLA  |
| Q1LZ83 | VTHWHRDHTGGIGDICKSINNDTTYCVKKLPRNPERKEIIG  |
| Q17R06 | SNGAILVYDITDEDSFQKVKNWVKELRKMLGNEICLCIVGN  |
| Q5SXG7 | GHAQIQVHVEPRYASIVDVTNGGTWGDWAWPEMCPDGYFAS  |
| Q02013 | GITSSLVDNSLGRNDLAHGVNSGQGLGIEIIGTLQLVLCVL  |
| Q8MJ50 | KGYADIVQLLLEKGAARTDLRNNEKKLALDMATNAACASLLK |
| P28161 | PDYDRSQWLNEKFKLGLDFPNLPYLIDGTHKITQSNAILRY  |
| O60238 | DNGNGKNGGLEHVPSSSSIHNGDMEKILLDAQHESGQSSSR  |
| P46638 | RWLKELRDHADSNIIVIMLVGNKSDLRHLRAVPTDEARAFAE |
| P56537 | IEDQDELSSLLQVPLVAGTVNRGSEVIAAGMVVNDWCAFCG  |
| P28845 | NTSLNLFHDDIHHVRKSMEVNFLSYVVLTVAAALPMLKQSNQ |
| P09417 | LLGEEKVDAILCVAGGWAGGNAKSKSLFKNCDLMMWQSIWT  |
| Q9QZB0 | YISILSPKEVSLDSRVREVINRSLDPSPHMYEDAQLQIYT   |
| Q8N2C3 | PARELMAVLLTPFRRLVSNELPGPLNGPSSRNRRDGF      |
| P50171 | TRDEFLLHMSEEDWRVIAVNLKGTFLVTQAAAQALVS      |
| Q16878 | AWPDKSNEMVKKSERVLRENQCAYINDSIGLHRVENISHT   |
| Q8BR26 | KKTMTNPTTVIEVYPDTEVNDYYLWSIFNFVYLNFCCLGF   |
| Q6NZB0 | QREEEIEAQEKAKREREWQKNFEESRDGRVDSWRNFQANTK  |
| Q9JHS9 | ENILSGNPLLNLTGSPQPQANFKVRRRDDVVFKNCAKGI    |
| Q8N5J4 | GKEIFYSQCQVQPDQEYLSLNNWNANYNYTYANYHELHHDC  |
| Q9JKL5 | NVPDELELNPIRSKIVRAFFDNRNLRKGSGLADEINFEDFL  |

|        |                                               |
|--------|-----------------------------------------------|
| P36543 | SDADVQKQIKHMMAFIEQEBANEKAEIEIDAKAEIEEFNIEKGR  |
| Q9H3N1 | HCKDGEFRRYQGPRTKKDFINFISDKEWKSIIEPVSSWFGPG    |
| P21796 | PSIRGALVLGYEGWLAGYQMNIFETAKSRVQTQSNFAVGYKTD   |
| A6NMD0 | PDTTEVNDYIYLSIFNFVYLNFCCLGFIALAYSCLKVRDKKL    |
| P09210 | IDGMKLVQTRAILNYIASKYNLYGKDIKEKALIDMYIEGIA     |
| Q5E9M6 | WYVLLLLQPTVYLVTCANLITNGGKSELLKSGGSKSTLKHIV    |
| P61289 | CEEAFQGTQKVFVMPNGLKSNQQLVDIIEKVKPEIRLLIEK     |
| Q3SYS0 | VGKTVDFRGTMPSEAPLHNQVKLVDPMDRKPTEVEWRFT       |
| Q61096 | HDLLSSEPEQQKFTISQVFQNNYNPEENLNDVLLQLNRTA      |
| P0A927 | DKTGASERGARGIVALGPNKAERIVVIYLRDTPASMAER       |
| Q9Y680 | IETFKQIDMDNRQLSKAEINLYLQREFEKDEKPRDKSYQD      |
| P31041 | CRYSYNLLAKEFRASLYKGVNSDVEVCVGNNGFTYQPQFRS     |
| Q6ZTI6 | PASEMRPRMLPVFFGESIKVNPEPTHEIRCNSEVKYASEKH     |
| Q3ZBK3 | KLSVKLKEEERMVEMFLEYQNIQRQNKLIQEKKENLLKLI      |
| Q9NQ88 | LSRSELM SVTPNTGMSLFIINFEEGREVKPTVQCICMNLQD    |
| Q9CR50 | QTPMPSEYQNVTVDILCNDNCRSTVQFHILGMCKKLCDSY      |
| Q8N983 | VVIYVNSRCCVPRVVAEYLNQAVREESIHCKSVVEEISTLV     |
| Q8CC84 | NNFIREQDLYALKSIKIPVRNHGILTETHQELMPLGASSE      |
| Q3T144 | MGGPYSYVYFFCTLPYIGVHNVVVFRVTSVKISYIGHVTQS     |
| P43431 | LCLGSIYEDLKMYYQTEFQAINAALQNNHQIILDKGMLVA      |
| A0JN69 | LYNEWRRTNQRVILLIPKSVNIPSNQQSLLGLHSAKRNSKE     |
| B0FP48 | QDIPAPANFSQRGYLTLRANRVLYQTRQGLHVLRVGNDTH      |
| Q2KIB9 | TKHVFKIITKEDRLKVIKLNCFVTEIDGFI SYIYGSKFQ      |
| Q3T108 | MLGSYGLARFRNISRIMRVNNSTMLGASGDYADFQYLKQV      |
| Q8CDN6 | CQGTAAATNNISATPTFLFRNKVRIDQYQGADAVGLEEKIK     |
| Q32L79 | ARRLCGQHLHHEIVKLCGDVNWSHVEKEKPPQTLLSQASEK     |
| P35293 | RDTFVKLDNWLNELETYCTRNNDIVNMLVGNKIDKENREVDR    |
| Q9R088 | PPDKDRENDKEKAVVCIENIASGKTTCLEFFSNNTDDEV       |
| P14190 | WEWKVGTGLNGFGVNLNDLTNGGTKLTIIVTGNKPIILGRT     |
| P97370 | KKLVEDLESFLKPYSVVEEQKNLTS CPD GAPPFIQHGPDYRAC |
| Q8BUY5 | PAFIYAKKRYIEQSQAIEYHNRFDAVQSAHRAATRGFIRYG     |
| Q8BG50 | SFVVSFYGTITWYNI FLVYNEERTFWHKISCCPCLILFYP     |
| P19437 | WKRMC TRSKSNVLLSAGEKNEQTIKMKEEI IELSGVSSQP    |
| Q8N6G2 | TTMRTAFTPKTGAVPALIRQNGIRRLGYTYSLSDFILNQTO     |
| P56537 | NRHGLLVPNNTDQELQHIRNSLPDVTQIRRVEERLSALGN      |
| Q07133 | KGAKGVQQRKSPAKARAANPNSGKAKMVMQKTDLRKAAGRK     |
| Q05717 | AVKKDRRKKLTQSKFVGAENTAHPRVISAPEMRQKSEQGP      |
| Q86Z23 | ADLMKNGQVRASAIADADQNYDYASNSVILHLVDGDEVFI      |
| P22676 | INGDGKLGLEMSRLLPVQENFLLKQGMKLTSEEFNAIFT       |
| P41317 | WNDGEPNNTGDGEDCVVILGNGKWNVDVPCSDSFLAICEFSD    |
| A6H759 | LTEVIDLSRFKCLKYLWLHNNKLGITFLTRNYCLAELYLN      |

|        |                                            |
|--------|--------------------------------------------|
| Q32LD7 | ASELIMTNVDQISIQVSTIEKNLEISKARDIVINRLLQYGST |
| Q8N6Q1 | RNIISLNMDLERDTQRIDEANQKLLKIQEREDKIQRLESE   |
| P35737 | MLACYVWGFYPADVTITWMKNGQLVPSHSNKEKTAQPNGDW  |
| Q2KIJ1 | LSTSVCQCLSQKINELKDQENQTYTLRSFQMARVIFNQNGC  |
| Q2HJ54 | CAYKLVTVKFKWGLQNKVENFIHKQERRLFTNFHRQLFCW   |
| Q8IUB2 | KRCITDETCPGVKKCTLGCNKSCVVPISKQKLAIEFGGECF  |
| Q1JPA6 | NTDLVEFKTLNEKEIEENLKNIFNISLEKCLTPKHGDKFFT  |
| O08756 | YHQKKNKIHTLEDFQRVINVNLIQTFNVIRLVAGEMGQNEP  |
| O35718 | DSSDQRHFFTLSVKTQSGTKNLRIQCEGGSFSLQSDPRSTQ  |
| P20615 | KKRCPYTKYQTTLELEKEFLFNMYLTRDRRHEVARLLNLSER |
| Q86SM5 | PLLNFLLPVFSPLATLLACVNSSSKPLIYSGLGRQPGKREP  |
| Q3T133 | ELQLRVRQLVEQVEQIQKEQNYQRWREERFRQTSESTNQRV  |
| Q5E9Y0 | LLKELNHPNIVKLLDVIHTENKLYLVFEFLHQDLKKFMDAS  |
| P50194 | TVPDEVVSIVLNISFNIQPENLERIKEEHRLSMAAENIVGD  |
| Q9UBY8 | FHITTATGFFCFENVAVHLSNLI FRTFDLFLVIHHLFAFLG |
| Q9JIN6 | NNSESNRALLHSDQHLLTNPKCSYIPCKRENQKNSESV     |
| Q8WVE0 | IFEYDKRFAMYGEEFIFYDYNPLDLPERIAAHSFDIVIAD   |
| O54998 | GQTKKEESTEEVKIEVLHRPENCSKTSRKGDLNAHYDGYLA  |
| Q8VE10 | LQLMANSTQMKKVMLTVFKHNHGAYQFFREALQFEIDDSSP  |
| Q8VI33 | MPASQSPAVKASIPATSTVQNVLINPISLIGSKNILITTNMV |
| Q8R2H9 | APGAPRFLLTDFDETVDENSDDSIVRAAPGQQLPESLRA    |
| P21237 | MLSSQVPLEPPLFLLEEKYKNYLDAAANMSMRVRRHSDPARR |
| P00639 | LIQEVRDShLVAVGKLLDYLNQDDPNTYHYVYVSEPLGRNSY |
| Q8VE42 | ELLKTHGHLIPTGTQSLWVGNSDEDEEQEKEEWEYQLQEK   |
| Q9QXV3 | KRSKAKAEREASPADLPTDPNEPTYCLCNQVSYGEMIGCDN  |
| Q3ZBV9 | VARALVQQGLKVVGCARTVGNIEELAAECKSAGYPGTLPY   |
| Q5E9E6 | ILGPGLNKAGKFPSSLTHNENMVAKVDEVKSTIKFQMKKVL  |
| Q99M54 | KQVFTKEEAKQSAETIAASQNSDKPSRDPETPQSSGSKRSR  |
| P14148 | GNFYVPAEPKLA FVIRIRINGVSPKVRKVLQLLRRLRQIFN |
| Q8R0J7 | ELQVLFAYQIKKTKLQSNNASLETLALLQAEKAKIEE      |
| Q3SYW9 | LRGGRATRLLRGGMSLRGQNLRRGGRAVAPRMGLRRGGVR   |
| Q8BSA9 | THKGKLMVTEEYIEFLLTIANQKMEENKRRIRGFYNYLQHA  |
| Q8K572 | ERMANVGS HVLVEANLNGRMNLTVETDRVTIKSYFKNLGNP |
| Q9BS92 | FWSVEFGGRTNKVFHIIWKYDNFAHRAEVRKALANCKEWQEQ |
| Q2LGB7 | LQNLDVAVNGSAWITILLTENFLRDTWCKFQFYSSLMNSVN  |
| Q9UI43 | KTWAGSQSRRLQRRLTEEFQNVRIKPEASRKESSEVYFLA   |
| Q8N5I3 | PQRPSYHDLVFCQGS DSTDNQTVGVRYVSIKPDNRKLANGT |
| Q9JKT4 | NHLTVWFATSLSIFYFLKIANFSDCVFLWLKRRTDKAFVFL  |
| Q9GZY6 | YYNWGRFSKPPEDDDANSYENVLICKQKTTTGAQQEGIGG   |
| O08602 | DLCQKLRNKVSN TKVDTHKNGYPHLQVTMIY LQSQGQIPS |
| Q8IZS5 | SKSAEFLMVKEDREATEGTGNPAFNMSSPDL SACQTAEKKV |

|         |                                             |
|---------|---------------------------------------------|
| Q17QR4  | DEQEIPFRLREIMRSRQEMKNPISNKKRKEAQAASFSTLE    |
| Q2TBU2  | DFDWREVEILMFLSAIVMMKNRRSITVEQHVGNI FMFSKVA  |
| P52843  | GPDELDLVLKYSSFQAMKENNMSNFSLIKEDQVTNGLKLMR   |
| Q2NL24  | GDSVPDLAGCTLLMPAVSVGNVQLAIDLIIISTLNMHKIGY   |
| Q9D504  | HYAVCGQNISLANKLLQYKANLEAKNKDGHTPLLLAVAENN   |
| Q8VBX0  | ACASGSIECVKLLLSYGAKVNPPLYTASPLHEACMSGSECS   |
| Q9BTT0  | PDSEEEDEDEDGDEDEDEEEENEAGPPEGYEEEEEEEEDE    |
| Q9ULC0  | ILFLLPSICSSNSTGVLEAANNSLVVTTTKPSITTPNTESL   |
| A4IFK7  | TDPNRPRFTLQELRDVLQERNKLSQLLVVQEELQCYKSGL    |
| P33782  | LVSGQSVTDVQSGSLPQGLKNRLSALLLMNKGFNGMSAVD    |
| Q6IED9  | LSLPIRNQKRLVKSALGENELFQQFPNPQSSWVQRTQEA     |
| Q13268  | LPYEMENRRGAVILVSSIAAYNPVVALGVYNNVSKTALLGLTR |
| Q91ZD6  | TSCEGNLEVGKGEQVTITLPIEGSTPPVTVFKGSKRPYLK    |
| Q17QH7  | IVLEDEGSQGTDAPTPGNAENEPDKEGLSPRRT PAPPEP    |
| Q64329  | RAFNLKEEMLTNKSIDCRFSNETLEYIKREQRWDSKTKTV    |
| P19652  | YQTRQNQC FYNSSYLVNQRENGTVSRYEGGREHVAHLLFLR  |
| P25322  | MVAAGSVVAMQGLNLGSPNNFLSCYRTHFLSRVICKDPD     |
| Q96A61  | EAVGAMDGWDGSIREVLYRGNADLELFQDDDELWLGDGSG    |
| Q8IZR5  | GVLLIMFSLNLHMRIPIQINWNLTDLVNTGLSAFLFFIASIV  |
| P10861  | VRLQAQSHLHGPKPRYTGTYNAYRIIATTEGLTGLWKGTSP   |
| P26436  | GSIDHQTSVQQLPGEFFSLENPSDAEALYETSSGLNLTSEH   |
| Q3ZCD8  | YTEGISQRMRVPEKLVAPPNADLEQGFQEGVSNASVIMQV    |
| Q3ZBQ1  | DGASITLPHGTLCECYDELGNRYQLPIYCLSPPVNLLLEHT   |
| Q9Z2Y8  | AVPNLSMLETVDSVKLADKVNSSWQKKGPTPLKVMVQINT    |
| P22794  | YLHLAFLMTTVFSLSPGTKANYTRLWANSTSSWDSVIQNK    |
| Q9BXS1  | IVVDENDKVI GADTKRNCHLNENIEKGLLHRAFSVVLFNK   |
| Q0VCT4  | FSMRKVPNRETTEISHVLLCNVTQRVSFVFWVTDPSRNHTL   |
| Q8BJF9  | KTMQAVNKKMDPQKTLQTMQNFQKENMKMEMTEEMINDTLD   |
| Q5J TZ5 | KLVGSDQRLPPEGDTHLFETNQMTQQGTGIP EAAQLPCQVG  |
| Q5XG99  | YFKIQASGETPNSLNTTVIPNGSMAMGTVPQGAPRLAVAVP   |
| P53701  | RGTAENKENLDPSNLMPPPNTAPADQPFALSTVREESSI     |
| Q60654  | KDWVWIDNGPSKLALNTTKYNIRDGLCMSLSKTRLDNGDCD   |
| Q6IPU0  | KNQLGHLESELSFLSTLTGINIRNHSKQTEDLTSTEMTEKS   |
| Q3SYT7  | VSLEQYLMEGSYNKVFLAKGNIPAESYTFIDILLD TIRDE   |
| Q9Y2V0  | KSIINSMLRDP SQIPDGVLANQVYQCIVNDCCYGPLVDCIK  |
| Q8TDQ7  | ESYHSYMWNFFKHIDIDPNAHILDGNAADLQAECD AFEN    |
| Q00322  | SMAAVPTLELCHDEL FADLFNSNHKAAGGLELLQGGPTR    |
| Q5H913  | CLRTTEETRRNVTIPI IGLNNSGKTVLVEAFQKLLPSKTDH  |
| Q4U5R4  | RQPRSVPNRYTFPCPYCPEKNFDQEGLEHVKLSHSTDTKS    |
| Q9DA17  | NSFMLKVTEYDQDMTLLMTNPPPCSI SQEKDGAPIYFPP    |
| O95567  | NPLIASSFSLVKLVLRRLKKNCCPPCKFGEGKLSKRLKH     |

|        |                                             |
|--------|---------------------------------------------|
| O08543 | ACDHTSKGFKRWECNRPHSPNGPLKFSEKFLFTPPFSLGFE   |
| P62823 | TITTAYYRGAMGFILMYDITNEESFNAVQDWSTQIKTYSWD   |
| Q9HDB8 | KNTEVLVWEECVANSAVILQNNFGTII DWAPRGQFYHNCS   |
| P35705 | HFSHLAWINTPRKNGGLGHMNIALLSDLTKQISRDYGVILLE  |
| Q0P5F2 | KALKTQNFKEPPFCSLLEQPNIVHDLPAAVLSYCVWRIPA    |
| Q00356 | EIIIGGVESEPHSRPYMAYVNTFRKRGYVAICGGFLITPQF   |
| P08074 | RDTVKALHASGAKVAVVTRTNSDLVSLAKECPGIEPVCVDL   |
| P43430 | KKKNTQLIPVSEAI PHESFDNETLVNDIMLLKLERKAQLNS  |
| Q9H8W3 | KTEIIDFSTDEPKTETESNVNAYEECPSGIPI DMWNKFQEL  |
| O43736 | VAVEEIRDVSNLGIPIYQLCNNRKSFRLLRRDLLLGFNKRA   |
| Q91YN9 | TANRLMGRTLTVEVSVETIRNPQQEESLKHATRIIDEVVS    |
| Q2TBX6 | IAAMLSTILYSRRFFPYVYNIIGGLDEEGKAVYSFDPVG     |
| O09101 | CICSASVTTVNLLSYLVVKPNVSSKRSSLSHKVTRALKCCV   |
| Q9DAF8 | AADGKRLPDIASPRDSPLNIKHKVAHQIWSGSEVPCPTFL    |
| Q08E00 | RAVHHQAPL TARHGLASCTFNLTSTSLKEMPAVAQAKLVT   |
| Q9CQD1 | NWVKELQRQASFNIVIALSGNKADLANKRAVDQEAQSYAD    |
| P06624 | VGFSLTGLHFLGMYTGA GMNPARSFAPAILTRNFTNHVY    |
| O60812 | VPSKRQLSGNTRRGKSGFNSSKSGKRGSSKSGKLGDDLQ     |
| A6NM10 | TGMVLAVLLHQGRPLPLFQRNLFYQKNKYRAPRGKPAPAS    |
| P28063 | LGRRAIAYATHRDNYSGGVNMYHMKEDGWVKVSSDVSDL     |
| Q29463 | AVAFPSDDDDKIVGGYTCAENSVPYQVSLNAGYHFCGGSLI   |
| P62956 | FAGREKGRVASEYFLEPEINLV TENTENILKTVRTATPPP   |
| A6NI73 | GFYNKPTLSALPSPVVTSGENVTLQCGSRLRFRDRFILTEEG  |
| P15864 | VSLAALKKALAAAGYDVEKNNSRIKLGKLSLVSKGILVQTK   |
| P41272 | YHTRPHCESCRHCNSGFLIRNCTVTANAECSCSKNWQCRDQ   |
| Q9WV93 | SSSDSELDETIEVEKESADENGLSSALCSMSPTTSSQVLA    |
| Q6GTX8 | QQRPD LAVDVLERTADKATVNLPEKDRETDTSALAAGSSQ   |
| Q9NZ63 | VNYVQHNRFYHEELNAPIRRNKEEPKARPLRVGDTEKPEPE   |
| Q3TBW2 | HFQRQKLMATEIYIPPKPAINPRCLPPPPKPKKEESGLVRL   |
| P35762 | RHDPQTTSLLYLELGNKPAPNTFYVGIYILIAVGAVMMFVG   |
| Q9CR48 | LGIATMYVRYKQVHALNPEENLIKLNKAGLVGLISLCLGL    |
| Q6ICB4 | ALQRRSSWKSVA SRCKPQAPNHRAAGLENGHCLS KDSSFVG |
| P10738 | VTSIELDSHLFLNLSSEKLSNTRVTLIHQDILQFQFPNKQR   |
| Q3T135 | APIPLHPSLQLTNYSFLQAVNTFPAAVDHLQGLYGLSAVQT   |
| O14494 | IIPFSIIVILGETLSVYCNLLHSNSFIRNNYIAT IYKAI    |
| Q16772 | IDGMKLVQTRAILNYIASKYNLYGDKIKERALIDMYTEGMA   |
| Q8VCQ3 | ADLKRHVEFLVAENERLRKENKQLKAEKARLLKGTAEKELD   |
| Q3ZCH9 | MLLVDDRALPDFKGIQTS DPNNAVIGLAPEHFHYQILNQAF  |
| Q14192 | CRKQLSGQRFTARDDFAYCLNCFCDLYAKKAGCTNPISGL    |
| A6NJW4 | LASVPVEAFVGLQIQVNLSANPWHCDALQEVLQVRLVPG     |
| Q9Z0F5 | HLLHHKVPWLYRTFHKVHHQNSSSFALATQYMSFWELLSLT   |

|        |                                             |
|--------|---------------------------------------------|
| Q60994 | GLETRVTVPNVPIRFTKIFYNQQNHYDGGSTGKFYCNIPGLY  |
| Q64329 | TGRGVKYWFCYSTKCYFIMNKTTWSGCKANCQHYSVPILK    |
| Q9JHQ5 | ALDEKSKLERVLQDLQLDQENQQDLLKAQDLDLLENTVATL   |
| Q9CXN7 | VCLLERTLDEDAHQDIAREMNLSETAFVFRKLPQTDDEFTQSS |
| Q3ZBR9 | RQKERISEQPLEEREDEELENLALQATEIEWLGFQKSSQVD   |
| Q9CRA7 | ENLRKSLELELEIIACGNVTDNGVIALRHFRLKYLFLSDLP   |
| P19404 | LIEVECLGACVNAPMVQINDNYEDLTAKDIEEIIIDELKAG   |
| Q8N614 | KNHTGRSTIMEDEPSKEKSINYTCRIMEYPNDCIHSIHLE    |
| Q8IX29 | PPWRSSDKHPTDIIRFNLDNRDPMETVQQGRRKRNRQMTPD   |
| O09044 | SILGNLKNMALDMGNEIDAQNOQIQKITEKADTNKNRIDIA   |
| Q64368 | YPPYPSSPVQVITGYQLPVYNYQMPQPQPAGEQRSYVPPA    |
| Q3MHN0 | FDGGVVLGADSRRTTGSYIANRVTDKLTPIHDRIFFCCRS GS |
| Q96K30 | SPAGTRPTPPDFDPPWEKANRTRGVGKEASKALGAKGSCE    |
| Q9CQS9 | MLDLAVTFIEKFETHLETVKNSPHLDANLQMSKALAKMDI    |
| P35695 | IAREVGEVRMQKYLKFKFSYGNQNISGGIDKFWLEGQLRISA  |
| Q9D7M1 | GQIQEAIALINSLHPELLEDNRYLYFHLQQQHILIELIRQRE  |
| Q9QUK3 | LSSSLNATYRSLAAKEKVFWNLAATRAVFGVQSTTAGLWAL   |
| P15514 | IPGYIVDDSVRVEQVVKPPQNKTESENTSDKPKRKKKGGKN   |
| O75323 | LQRAAPCSLLPRLRTWTSSSNRSREDSWLKSLFVRKVDPRK   |
| Q8BVN8 | PVRRELYSQCFDELIREVTINCAERGLLLLVRDEIHMTIA    |
| Q9BR09 | RLGVLFPCRPDGTADMHIINGEDMGPSARGLPAAQPLYAV    |
| P49615 | EGVPSSALREICLLKELKHKNIVRLHDLVHSDKKLTLVFEF   |
| Q8IVN8 | WMQYLREGYTVCVDCQPPAMNSVSLRCSGDGLDSDGNQTLH   |
| P23185 | IGLKNRVWAGYTDSYVAKTMNLDQRTVAPLIVQFFGDVND    |
| Q5U4E0 | YSLGDCSVRWAYILAIIGILNALILSFLAFVLGNRQTDLLQ   |
| O70552 | CRYGKHKHFFTIASFKGRWENWELAQHVSCAVNRATGDCSS   |
| Q9EST4 | FRYLLTPCLQKSVQNKIKSLNWLEMEKSRCIPEMSDSEFCI   |
| Q0IIC4 | DTALEELCKPLYCKLCNVTLNSAQQAAHYQGNHGGKLRN     |
| Q6ZRP0 | RSMFSPYREGPIRGPCALAPNPSSERRSPRPIFDLEFHLE    |
| Q3SZG6 | LQRATMDATRTTRHLEETIDNFEKQKIKDIKTIFSEFITIE   |
| Q9BQ15 | PHPPHTPSHPPSTRITRSQPNHTPAGPPGSSNPVSNKGET    |
| A6NCD4 | EQRPNRSYPKCFSLGVNLQNVASEEEEEEFMKFILTDLK     |
| Q9NZ63 | KDKISEEEDLHLGTSFSAETNRRDEDADMMKYIETELKRRK   |
| Q1JQ93 | KGNNGVYGWDLKRKIIISRVANFITQILLRPGASDLTGSFRL  |
| P63013 | WFQNRRAKFRRNERAMLANKNASLLKSYSGDVTAVEQPIVP   |
| Q9QZM3 | NEPDFNPPRLGAETLPRATVNLEVWRSLNDRRLRTQNYEAY   |
| Q96BX8 | ALSAPRYMDLMDWIEAQINNEDLFPTNVGTPFPKNFLQTV    |
| Q4VA44 | MRVHTGEKPYVCSECGRGFSNSSNLCMHQRVHTGEKPFKCE   |
| Q9CP21 | FFALNRNLEBESSFTRLQDQNRTRREGQLPPLRETWYGR LPA |
| Q9CR78 | PEEEPEYHQDAAAQESFAVSNRELCEDEKEFGPPVCEGTS    |
| Q8N0Y7 | SLQGIAXHVEGLSEEAIMELNLP TGIPIVYELDKNLKPIKP  |

|        |                                             |
|--------|---------------------------------------------|
| Q96E40 | SGTPVTNNLLEKCKTLVVSQSNLSSLRKYPHDVNVHLSCD    |
| Q96EH8 | LTGDLVRFVWDRRGCLFAKVNAGCRLLREGVPVGPAPLWAV   |
| Q58DT0 | GIFRVVKSEALAKMWGQRKKNDRMTEYKLSRALRYYYKTGI   |
| Q80VY2 | EPKGEGQSRELGRKFALTANIFRKFRLRSVRPDRRLLKEK    |
| Q07133 | MSLAALKKALAAAGYDVEKNNSRIKLALKRLVNVKGLVQTK   |
| Q17QQ2 | HSVVGVEISELGIRDFTEQNLSYSEEPIMEIPGAKIFKSS    |
| Q8QZY6 | REKCGVPFSCCVDPAPQKVVNTQCGYDVRIQLKSKWDEFIF   |
| A0JLT2 | YNLEQAYNKFCGKVKKEKLSNFLPDLPGMIDLPGSHDNSSL   |
| P11352 | LTGGEPVSLGSLRGKVLLENVASLUGTTIRDYTEMNDLQK    |
| Q9CZJ0 | KVTITVDEYSSNPTQAFTHYNINQSRFQPPHVHMDPIPYD    |
| Q3MHQ4 | ERLQSKLSDPHAIEAEKFQCNCNKTYSTFSGLGKHKQLHC    |
| Q8WZ71 | HFCCLDLFSLEELQGEFPGWRLNRKPIESTLVACFMTLVIVVW |
| Q9D8T0 | GLPQPCPEEHLRFIVSQAANVIGPKICLEDKMLMSSVKDN    |
| Q8VCZ2 | FVPDGPLHLHYHENQWVKLMNWQHSMTMYLFFGVSGLMDMIT  |
| Q99944 | CHVDVDECRSTSITLCSHHCFTAGSFTCGCPHDLVLGVDGR   |
| Q9NVV0 | GILSCLLLAEPPLKFLANHTNILLASSIWIITFFCPHDLVS   |
| Q92914 | ANPDGSIQGTPEDTSSFTHFNLIPVGLRVVTTQSAKLGHYM   |
| Q8R173 | HCSVCKRCIRKMDHHC PWVNNCVGENNQKYFVLFMTYIALI  |
| P63101 | FEISKEMQPTHPIRLGLALNFSVFYIEILNSPEKACSLAK    |
| O15520 | YNTYASFNWQHNGRQMYVALNGKGAPRRGQKTRRKNTSAHF   |
| P19437 | LSAMLISAFFQKLVTAGIVENEWKRMCTRSKSNVVLLSAGE   |
| Q64704 | FMDIAMLVENQGEMLDNIELNVMHVTDHVEKARDETKRAMK   |
| Q9NYW5 | IASVILNFVGIIMNLFITVVNCKTWVKSHRISSSDRILFSL   |
| P30301 | VGFSLALGHLFGMYTGAGMNPARSFAPAILTGNFTNHVY     |
| Q96B33 | LSGVVLFVAGLLGLIPVSWYHFLGDRDVLPAASPVTVQV     |
| Q3ZBP0 | NCHEQTYEEFLRTFTHLSKDNVTKREAFGTNSSENNTSIK    |
| P20160 | DQCRPNNVCTGVLTRRGGICNGDGGTPLVCEGLAHGVASFS   |
| P42125 | NMMRKATADNLIKQREADIQNFTSFISKDSIQKSLHMYLEK   |
| Q9JJW0 | QMHSFLAAFIGGLLFGENNNINSQINMYLTSRVLYALCRL    |
| Q2TJ95 | IGVCLSSCPGYYGTRYPDINKCTKCKVDCDTCFNKNFCTK    |
| Q96G25 | YGRLTWPSVLDSFALLSGQLNLTNKLKHEKTPLFRNQV I I  |
| Q96EY5 | GGLLERTASRLGSRASTLRRNDSIYEASSLYGISAMDGVPF   |
| P17041 | HTGQKPYECAICQRSFRNQSNLAVHRRVHSGEKPYRCDQCG   |
| O35943 | TVNAGATRAHHLNLHYLQILNKKQSVCVVHLRNLGTLDNP    |
| O88838 | GVATALAPLQADHYAALLGSNSESWGWDIGRGKLYHQSKGL   |
| P19632 | FSRKMSVQEYELIHKDEKENCLRKYRRQCMQDMHQKLSFG    |
| Q2M2E3 | FIFSTLMLFPINIWI FELERNVSIPIGWSYFIGWLVLILYF  |
| Q9D9M5 | RIVYIGDGGNDVCPVTFLLKNDVAMPREGYTLHRTLAKMSQ   |
| Q58DN3 | IQNLIDFAQEYWSCCGARGPNDWNLNINIFNCTDLNPSRERC  |
| Q16667 | EPIEDEQTPIHISWLSLRVNCQFLGLCALPGCKFKDVR      |
| Q80ZQ3 | NTFIRHYRLYQYVLSQDQEVNLTVAHEQICAPPQPLPLTDG   |



|        |                                            |
|--------|--------------------------------------------|
| Q9D8C4 | NLEDCRLRVQVQPLELPVVVNIQVSSQPDNHRVLSVSGFPAG |
| Q6NZQ8 | CVVWSLYVLIDRTAEEIKQGNNDNGVLEWPFWTKLVVVAIGF |
| P51572 | PKRWQKIFKSRLVELLSYGNTEFFVVLIVILVLLVIDAVRE  |
| Q8BS03 | MIALLDYHNQVRGKVFPPAANMEYMVWDENLAKSAEAWAAT  |
| Q9BVC5 | NAFRKLSNSSSSVSPILISSNLPVNNKTEHNNNDKQNHDL   |
| Q8BG84 | QKKQGLPNNKRQQRPEERLNLATNGLEMTPDIVADDRLEPE  |
| P50225 | SFFMRKGMAGDWKTTFTVAQNERFDADYAEKMAGCSLSFRS  |
| P39905 | PKQMAVLPFRERNRQAAAANPENSRGKRRGQKGNRGCV     |
| Q3U4G0 | QRYLNGVKGNGAAPVLELANEVDYAPSLMARIILERFLQG   |
| P04975 | ASGASEDMGATVNGDVFEANGPADGYAATAQADRLTQEPE   |
| O70514 | LSFLLLATQAFSEKVRKRAKNAPHSTAEEGVEGSAPSLGKA  |
| Q8BLR7 | MLQVLAKDCYPETYVPTVFENYACLETTEEQRVELSLWDS   |
| Q99LU8 | NNPNQSVFLFIDRQHLQTPKNKATIFKLCISICLYLPQEQLT |
| P30084 | ICPVETLVEEAIQCAEKIASNSKIVVAMAKESVNAAFEMTL  |
| P04095 | QSDNEDARIHSLYGMISCLDNDFKKVDIYLVNLKCYMLKID  |
| Q3MHR7 | ELQAHGADELLKRVYGSYLVNPESGYNVSLLYDLENLPASK  |
| Q91V08 | IGLHRESSEHPWKWTDNTEYNNITIPIRGEERFAYLNNNGIS |
| O94811 | FRRFVHGDARATGREMHGKNWSKLCCKQCIDGRNVTVTD    |
| O95997 | KTFDAPPALPKATRKA LGTVNRATEKSVKTKGPKQKQPSF  |
| Q99LS3 | DGATDMEACPPADAFIGFGGNVIRQQVKDNAKWYITDFVEL  |
| P09428 | KGDTPTLQLEEVDPKVYPKRNMKRFVFKTEIKNTVEFES    |
| Q0ZUP1 | LVGFLVQKPLIEKCSVAVQENRTEPTGRSATLECPDRDWHPH |
| Q3T013 | PPPAGLNSWVELPMNSSNGNDNGKNGGLEHVPSSSSIH     |
| Q17QF9 | PAGEIGNGTSGAIYFDQVLVNEGGGFDRTSGSFVAPVRGVY  |
| P19217 | LVDKIIKHTSFQEMKNNPSTNYTTLPEVMNQKVSFFMRKG   |
| Q2KJ37 | ACSYATVYLIYMKFKATYDGNHDTFRVEFLVVPVGGLSFLV  |
| Q9D3J9 | CRDVIRETYLVPPSCKSICKNYNDLHIAGGQVMAINSVMAN  |
| Q93LM8 | DKTGASERGARGIVALLGPNNAERIVVIYLRDTPASMAER   |
| P13980 | LSSVLVLSGCGAMSTAICKRNLEVKTMSETIWLEPSSQKT   |
| A4FUA8 | LLLNNDNLLREGAAHAFAYNMDQFTPVKIEGYEDQVLITE   |
| Q9CY21 | EHSGPPELFYDQNEARKYVRNSRMIDIQTKMTERALELLCL  |
| P35695 | LASSITENTFWNKEFSAEAVNGVFLCKSSSKLACATNNLA   |
| P09038 | ASKCVTDECFERLESNNYNTYRSRKYTSWYVALKRTGQY    |
| O14798 | SFKGEECPAGSHRSEHTGACNPCTEGVDYTNASNNEPSCFP  |
| Q9UMR7 | SSTFWHPREPSDPNERCVVLNFRKSPKRWGWNDVNLGQPQR  |
| Q9D1D6 | RESFEESWTPNYKQCSWSSLNYGIDLGKIAECTFTKMRSNS  |
| P30048 | VNCEVVAVSVDSHFSLAWINTPRKNGGLGHMNIALLSDLT   |
| Q9NS61 | ALREEAPREHVESFFQKMDRNKDGVVTTIEEFIESCKDENI  |
| Q58DM8 | GFLSHWDQLTRVKKPVIAAVNGYALGGGCELAMMCDIYAG   |
| P07992 | IPDYVLGQSTCALFLSLRYHNLHPDYIHGRLQSLGKNFALR  |
| Q8TBF5 | ALENEDICQWNKMKYKSVYKNVILQVPVGLTVHTSLVCSVT  |

|        |                                             |
|--------|---------------------------------------------|
| Q5E971 | TGRIPDQLVILDMKHGVEAKNYEEIAKVEKLPLEVELRRL    |
| P05529 | VFNNLSLKIEQGELIGLLGENPAGKTTLFNLIIRGGVSNYEG  |
| P53674 | FDRVRSIIIVSAGPWWAFEQSNFRGEMFILEKGEYPRWNTWS  |
| Q99N84 | YSWQQPPERELSRLRRLYQGNLLEESGPPPEMPEMPTTP     |
| P07146 | GFLEGGKDSQCQGDSDGGPVVCGELQGIVSWGYGCAQPDAPG  |
| Q3TQI7 | VPTNMAVNYVQHNRFYHEELNAPIRRNKEEPKARPLRVGDT   |
| P10279 | HDCVNIIVKEHTVTTTTTKGENFTETDIKMMERVVEQMCITQ  |
| Q3SX42 | QTMQNFQKENMKMEMTEEMINDTLDDIFDGSDEEESQDIV    |
| Q8CJ61 | VTGVLILFSLNLHMRIPQINWNLTDLVNTGLSTFFFFIAS    |
| Q9R0Q9 | LLALLSPLTPLAVVTLQASNVPAVVVVKLLQAATNYRNGH    |
| P20851 | ICKSRDCDPPGNPVHGYFEGNFTLGSTISYCEDRYLVG      |
| Q9NZQ0 | MKQELGPHGNMENIIFVVCANKIDCTKHRCVDESEGLWAE    |
| Q8N614 | SFVTFLQPVRETQIIMRIFLNPSNFRNFRTRCQDITGEFKM   |
| Q9Y3A4 | AASLRVLERERKRKRKELLNFYAQHRESKMEHLAQLRKK     |
| P47754 | APPGEFNEVFNDVRLLLNNDNLLREGAAHFAQYNLDQFTP    |
| Q9DCS2 | AAGHLLKTKAVLITYGPIYAVNGKISPOQSNVDFDLTLRCRNP |
| P59024 | VHYEGYLEKDGSLFHSTHKHNNQPVWFTLGILEVLKGDQ     |
| Q80YT9 | FGSSRSSEPANQSFESCAKINSHSFRNDEMAGRPSFPVFFF   |
| Q2KIH8 | HTPGQSRPSIRTAALSIAWPNALATRWTHLGLAPAPTMS     |
| Q96B26 | VTINEETALAEVNLKKSXYLNIRTHPVATSFVAFDDTLIV    |
| Q32PI9 | SINIENMQFIHNGTYICDVKNPPDIVVQPGHIRLYVVEKEI   |
| Q9JJJ3 | FATAVVMALYATFGVSGGHINPAVSFAMCTFGRMEWFKFPF   |
| Q9CRD2 | MERYDDAIQLYDRILQEDPTNTAARKRKIAIRKAQGKTVEA   |
| Q08708 | NGRVSIRDSPANLSFTVTLENLTEEDAGTYWCGVDTPWLRD   |
| Q9JIK9 | VRPRLIAELARRVRALREQRNQRDSQLYALDYETLTRPHS    |
| Q9DAP7 | RENPPPKPDFSOLQRNILASNPRVTRFHINWDNNDPSLEAI   |
| Q9CQ52 | ADNGTWQVHGVTSEVSSLCNTLRKPTVFTRVSAFIDWIEE    |
| Q9UF11 | LGYHDETAQDEEDRVLIHFNVRDIKIGPECHDVQPPEGRS    |
| P82347 | PTRSLVMEAPKGEVINAEGNMEAICRSELRLKESKGEIKL    |
| Q9BXU9 | ELKHILYHAFRDHLTMKDIIENIINEEESLNETSGNCQTEF   |
| Q8BPA8 | EPVPSGAGSLGSELIKESNANPIFMRKDKTTSFQWRIRNLP   |
| Q8BZI6 | VSVQDIQVHLAQGHVAIVLVNSGVLHCDLCSPPVKYCCFTP   |
| O94903 | TKPADMVEIAYGHGQRTFGENYVQELLEKASNPKILSLCPE   |
| Q10738 | YLRKFYPHDSKTKKVNSLVDNLKEMQKFFGLPMTGKLSFYI   |
| Q05718 | SVLQQLQTEVFRGAHTLYVPNCDRGFYRKRQRSSSQGQRR    |
| P14847 | DFVLSPEQISTVYVGGTLPNVNLNRALNYKAQGDVFIKQ     |
| Q3ZCA1 | IIHLCQGEIRQDSLIEAGAANVGRVVNSWYRYRPLVAELVV   |
| Q14331 | VKLSDSRIALKSGYKYLGINSDGLVVGRSDAIGPREQWEP    |
| Q17QF2 | MCKFIPEHTRTLGNEFRFCFVNYNSGLDCNLSVQLPVQEGPK  |
| O75841 | KQMLERYQNSPPNDDQWKNGVTKTDRMLQDNCCGVN        |
| Q8N1A0 | IQTEKVDEVIKEWEGSFFKDNPRLRKKSLSLRFDLHLAATD   |

|        |                                              |
|--------|----------------------------------------------|
| Q9H1U9 | PHITNVGEMKHYLCGCCA AFNNVAITFP IQKVLFRQQLYGI  |
| P39687 | EPLKKLENLKS LDFNCEVTNLNDYRENVFKLLPQLTYLDG    |
| O55126 | KNQLLEFSFWNEPVPRGPNIYELRSYQLRPGTMIEWGNY      |
| O08604 | LWYEAKCLVDEILILHLSNINKTMTSGDPGETANATEVGECE   |
| O35906 | FQFSSKHKELLARRWGQQKGNRKRMTYQKLARALRNYAKTG    |
| P62826 | KSIVFHRKKNLQYYDISAKSNYNFEKPF LWLARKLIGDPNL   |
| Q91ZD6 | AFHTVRYDFK PASIDTSCEGNLEVKGQVTTITLPNIEGST    |
| P47876 | LAAAQQKAGDEIYKFYLPNCNKNGFYHSKQCETSLDGEAGL    |
| Q70YC4 | IQGF SQIWVLF PFCGGTFHHNEKDV LGLQDFERESVSTSQS |
| P26452 | NLKRTWEKLLLAARAIVA IENPADVSVISSRNTGQRAVLKF   |
| A6H773 | TYKAITYSVVLSEKSTVFHQNDVKIPNTHVFTTFYAKTKS     |
| A2RRY8 | SKVSLPEIPKEKYPEEFSLNSQTEDGQRPEWTFYPRFSSN     |
| Q2YDG7 | LTIGVIICIFVIFVLI FTI INWTA VKDFWAKASTTEIQSEL |
| P35270 | AGSLGDVSKGFVDLSDSTQVNNY WALNLTSMCLTSSVLKA    |
| Q9NYK6 | LHTKSLRGHKDCFEKYHLIANQGC PRSKLSKSTYEEVK TIL  |
| Q2KIJ1 | QENQTYTLRSFQMARVIFNQGC SILQKHSRDAHFY PVREG   |
| Q8NBA8 | NRCLSTLECAAVALS ILEKNNYIQETLLRPLQALCSFQLQH   |
| Q9BUA6 | RINVKNEE LEAMVKEAPGPI NFTVFLTMFGEKLGKTDPEET  |
| Q3ZBD9 | PITTHR TTATPKAGPVVRKNPGVGNGDDEAAELMQQVNVL    |
| P28676 | ETCRIMIAMLDRDHTGKMGFNAFKELWAALNAWKENFMTVD    |
| P79103 | TDITYPAGFMDVISIDKTGENFRLIYDTKGRFAVHRITPEE    |
| Q9BQ65 | PEDDSTKHGGRVRTFPHERGNWATHVYVPEAKEEFLD LLD    |
| Q9UNK0 | RQNLDDLVTRERLLLASFKNEGAEPDLIRSSLMSEAKRG      |
| Q9Y3B3 | HKTVYDFQVGEDPPLF PSENRVSALTQMESACVSIHEALK    |
| P07306 | LSCQMAALQNGSERTCCPVNWEHERSCYWF SRSGKAWAD     |
| P33681 | SGDMNIWPEYKNRTIFDITNLSIVILALRPSDEGT YE CVV   |
| Q8N4T8 | GLVGFSRALAKEVARKKIRVNVVAPG VHTDMTKDLKEEHL    |
| Q8R3G9 | ILGAAFKEPYNRILNETLYENAKLLSDNTDEAKDFQKAMIV    |
| Q9D8X2 | EQRAEPVEKAKSHLELPLEENLNRR LQEEGVSVEARTVEDAI  |
| P00760 | DKIVGGYTCGANTVPYQVSLNSGYHFCGGSLINSQWVVSAA    |
| P68252 | REKIEKELEAVCQDVLSL LDNYLIKNCSETQIESKV FYLKM  |
| Q3ZC21 | FICNIFDYLRVNNMPMALVNPVYDCLFRLAQPDSL SKEEE    |
| Q9CXK4 | MQRTRSDNIQFLPFLTTDVNNSWLSYGV LKGDGTLIIVN     |
| Q96L14 | RQSIDKTAGKIRILFKDKDRNWDDIESKLRAESEVPIVKTS    |
| Q99N05 | FRQFRSQPAIASLDV LMTILNMLEFCIAVSVSAFGCKASCC   |
| Q923D3 | TTSPATSLSESLSASVTS SHNSTVANIQPT EAPMAPASPTE  |
| Q8QZW2 | LTDPEVARRWGERKSKPNMNYDKLSRALRYYYYDKNIMSKV    |
| P18351 | QQKNLAE LKRSFLDPALKQINEKT PLLAKYSIDDSGKFLFS  |
| Q9NPJ6 | PRRPYPTDLEMRSGLLGQMNPSTNGVNGHLPGDAL AAGRL    |
| Q9Y2B4 | VQGRQPLTEGPRVIFIKPYRNRTPMGHMKQLDVADQWIWFE    |
| Q8VBV3 | AGSV ERVNKLICVKALKTRYNGEVGDIVVGRITEVQQKRWK   |

|        |                                            |
|--------|--------------------------------------------|
| Q9QWG7 | VWRKDLKMIHGYPMIYAFALNWERIEEFQSTPGDIVITYP   |
| P46004 | IAIALSVFTFAHAQSFENVENNAKVFSLHLGATRMIIKPN   |
| Q9NYN1 | ELLALHAKETQRSIPALLGNKLDMAQYRQVTKAEGVALAG   |
| Q8CDN6 | VPLRYVKFQNVNSVTLFVQSNQGEETTRISYFTFIGTPVQ   |
| P61289 | KCNTVKMWVQLLIPRIEDGNNGFVSIQEETVAELRTVESEA  |
| P23888 | KISWVPLAGGFQGSALTGRENKVFARLYAKRDELNERVDF   |
| Q9Y287 | VIPLNTSIVMPPRNLELLINIKAGTYLPQSYLIHEHMVIT   |
| Q00535 | LKGLGFCHSRNVLHRDLKQNLINRNGELKLDLDFGLARAF   |
| P12979 | LEFGPNPGDHLAADPTDAHNLHSLTSIVDSITVEDMSVAF   |
| Q96MP8 | TQAGHALPLLPQEFPEVPLNIGGAHFTTTLRSTLRCEYEDTM |
| P97361 | SLLQLAVKLNITAEVLAVKDNQGRHILVLDGCTHSPGSLKI  |
| P33783 | KKVTFLFVVSLLPSTVLANWTPGEDFSGELKLEGAVTSTR   |
| Q9NP98 | LGIIDLAYGAKAELPKYKSFNRTAMPYGGYEKASKRMTFQM  |
| P10598 | ILPKHKQMPLLNSETVLRRLINSQIPSLASLANLHLPQSLVQ |
| P62754 | PRVLQHKRRRIALKKQRTKKNKEEAAEYAKLLAKRMKEAKE  |
| P35293 | WLNELETYCTRNDIVNMLVGNKIDKENREVDREGLKFARK   |
| Q61955 | SPQENFPNTLNCAEVKIYSQNK CERAYPGKITEGMVCAGSS |
| Q9NS61 | FEDFVAGLSVILRGTVDDRNLNWFNLYDLNKDGCITKEEML  |
| P61982 | MAAAMKNVTELNEPLSNEERNLLSVAYKNVVGARRSSWRVI  |
| Q96F27 | EFTQIEMKVMGLQFGNECLNMHVMSIEEVERILDETQE     |
| P56402 | ILHEITPVEIRGDLAVNALHNNATAGQAVTVELFLTMQLVL  |
| Q96G21 | SRLKMFAKELKLVFFGAQRMNRGRHEVGALVRACKANGVTD  |
| O15217 | KIPNILSAFPFLQEYTVKLSNIPTIKRFLPESKKKPPPDE   |
| Q9D9P2 | SHLKPLEQKDKMGGKRFVFNCHTTRERTSQDQVTEIPQEK   |
| E9PI22 | KPSISGAPHLNSYQSLELPQNQDQSGTEELMIVLEQGTQVR  |
| Q60682 | ESYWIGLSYDKKKKEAWIHNGQSKLDMKIKKMNFTSRGCV   |
| Q9X2V8 | KVFFYSWNIEKKGMAWIFISNKKENRLYSLNEEHLIRKEIS  |
| Q9D9M4 | AAASDGIQPGDVLISVGHANVLGYTLREFLKLQNITIGT    |
| Q8K3I6 | LLSEVQGYVHSFAESRPLPGVNLDDLPLGYHLPNVSLTFQAW |
| Q9NVS9 | KDGFRRFTNFESRKGKELDSNPFASLVFYWEPLNRQVRVEG  |
| Q5E9E3 | SRDNVVVFQKVIITNQENVYQNNTRFRCSVPGYFFTFQVV   |
| Q9UBT3 | QLDEQDGTAEGETTGHPVQENQPKRKPISKKSQGRKGQEGE  |
| P07478 | ISLPTAPPAAGTESLISGWNTLSSGADYPDELQCLDAPVL   |
| O70552 | SGTSSDEESCSREAQIIPKVNPKSVYQVENFKQSLQPWFC   |
| Q6GV28 | TSSCTCLNIHKSNECKESENSIEDISLPECTAMPRESIVRA  |
| P27814 | YNSFWIGLRFTLPDMNWKWINGTTFNDSVLKITGVTENGSC  |
| Q08AT1 | GKSALTVKFLTKRFISEYDPNLEDYSSSEETVDHQPVHLRV  |
| Q9HBJ8 | FKVRLSIRTALGDKAYAWDTNEEYLFKAMVAFSMRKVPNRE  |
| Q9Y651 | RPMNAFMVWSRAQRKMAQENPKMHNSEISKRLGAEWKLLT   |
| Q9CWG1 | WMASSVSSSFTASTLPDITNEDFIKECVQVHNQLRSKVSP   |
| Q8IUX1 | PMVIEIIEKNFDYLRKEMTQNIYQMATFGTTAGFSGIFSNF  |

|        |                                            |
|--------|--------------------------------------------|
| Q3SZJ9 | LSYIAKIKLPKKGTFIEFRNGMLNVSPIGRSCSQEERIEF   |
| P61247 | VAFRKFKLITEDVQGNCLTNFHGMDLTRDKMCSMVKKWQT   |
| F8VTS6 | PQLHRVGIFLDVGMRSIAFYNVSDGCHINTFIEIPVCEPWR  |
| P53519 | PASVPSPVFNNIVEKLGKWHKNGKYLVLKNNTPYYISFSEVF |
| P62821 | YYRGAHGIIVVYDVTDQESFNNVKQWLQEIDRYASENVNKL  |
| P51908 | HPYVTLFIYIARLYHHTDQRNRQGLRDLISSGVTIQIMTEQ  |
| P46065 | TECPSGQLTLYEFRQFFGLKNLSPWASQYVEQMFFETFDNFK |
| Q5SWZ9 | IVDKKVLITGSLNWTQAIQNNRENVLIMEDTEYVRLFLLE   |
| Q9TR36 | IETWHKPDGLTLENVHGLDPNTWKTVEIVHIDIADRSQVEP  |
| Q9NZH4 | KQKQPSFSAKKMEKTKVKAKNSVPASDDGYPEIEKLPFNP   |
| Q3LI81 | SCQPASLKGNSCPPKTSKSKNFETLERASSQCQCQSQNPES  |
| Q9D711 | YLLEGGMAHEDFCGHVGMNPGDLQWMTAGRGILHAEMPC    |
| Q00188 | YKALNVRRLNIMAGDEINSRNFDTLVELIAPTDDVVVDNG   |
| Q9UEE9 | TSEEDEDYVPSGGEYSEDDVNELVKEDEVGEEQTQKTQGK   |
| Q9D309 | EVLIGEKTGNVARGINIAVVNYETGKVIATKYFDMYEGDNS  |
| P09488 | LPEKLYSEFLGKRPFAGNKITFVDLVYDVLDLHRIFE      |
| P04632 | VMSDVTGKLGFEFKYLWNNIKRWQAIYKQFDTDRSGTIC    |
| Q9TT89 | RIEIAHALCLTERQIKIWFQNRMRKWKENKTSVPGTTGQD   |
| Q9D902 | KKKAKVEHGGSSGSKQNSDHNNGSFNLKALSGSSGYKFGVL  |
| P61313 | SLQSVAEERAGRHCALRVLNSYWGEDSTYKFFEVLIDP     |
| O94760 | MQQMSDHRYDKLTVDDIAANCIYLNIPNKGHVLLHRTPEE   |
| Q9Y287 | LQPDDVYYCGIKYIKDDVILNEPSADAPAALYQTIENIKI   |
| P05833 | PISFERLRERLSLISQVKEQNRIKKAITKLDIGNLDASM    |
| P24668 | GKEQRRAVVMI SCNRHTLAANFNVPVSEERGVQDCFYLFEM |
| Q8C552 | QEGKIEATSDSDGVNYPWYGNTECTCTIVGPTKRDSKFIIS  |
| P15692 | MRCGGCCNDEGLECVTEESNITMQIMRIKPHQQHIGEMS    |
| Q2KI19 | KNRQKSIKEEBEQERRDMGLKNALGCENKGFALLQKMGYKSG |
| P29459 | LCLSSIYEDLKMYQVEFKTMNAKLLMDPKRQIFLDQNMLAV  |
| Q8N9P6 | PGPICSANICLSGVRFLTCLNRVREHVGVSPSPAAPICFF   |
| Q9DAS2 | LSGGCFPTIFSPNSPLVLTDNSQNWDRWLHQPTYSRSNQDN  |
| Q9QYB1 | ADCNLLPKLHIVKVAKKYNRFDIPKGMTGIWRYLTNAYS    |
| Q8BJG4 | AKLSAPRYMALLMDWIEGLINDEDVFPTRVGVFPKPFQV    |
| Q9UBT3 | AVLLGLSWLCSPLGALVLDNFNNIRSSADLHGARKGSQCLSD |
| Q96D70 | GIFAEACNNATYVEVWDFMNRSGEEQERVLRYLEDEGRSK   |
| Q91X52 | GVEPVCVDLADWEATEQALSNGVPVDLLVNNAAVALLQFPL  |
| P31041 | NCDGDFDNETVFRWNLHVNHTDIYFKKIEFMYPPPYLDN    |
| P47753 | KEFIKIEISAENEYQTAISENYQTMSTTFKALRRQLPVTR   |
| Q9WTP9 | TPGLPGLPASHRGTSLVDPNRPRLNPMPSASASSPLPPP    |
| P53347 | ANLTGNTESLLEPYIRLQNLNTPDLRAACTQHSVAFPS EDT |
| O55135 | EVFRQTVADQVLVGSYCVFSNQGGLVHPKTSIEDQDELSSL  |
| Q06599 | LRSSQASSNKPAHVVDINS PGQLRWWDSYANALMANGV    |

|        |                                             |
|--------|---------------------------------------------|
| O54831 | MEYLVKALTCCHNYSIKTPENLDEAQQIPFNEFPKLIILSRM  |
| P00757 | NWVLTAACHYNDKYQVWLGKNNFLEDEPSDQHRLVSKAIPH   |
| Q9D2R4 | KEQDYQRDREENFRITSEDTNRNVLWWAFAQILIFISVGIF   |
| Q8HZJ5 | QSFLNVRNWMSQLQANAYCENPDIVLIGNKADLPDQREVNE   |
| P10833 | LDTAGQEEFGAMREQYMRAGNGFLLVFAINDRQSFNEVGKL   |
| Q9CZ04 | ATSQDPEQHLTELREPASGTNRQPSKASKGKGLRGS AKI    |
| Q9HB71 | RKRVRDALTAEKSKIETETIKNMQQKSQKKAELLDNKPAA    |
| Q8VDP2 | MRPRDRSRVIDAAKHAHKFCNTEDEETTYLRRPEGIERQYR   |
| Q9QZE7 | LLGVADLTGELMRMCINSVNGDIDTPPEVVSQFLRQVYDGF   |
| O95073 | EKLDLLKLVKPYVKILEEHTNKHSHVIVEKNRCWDIIAVNYN  |
| Q8BGB7 | EGTTPIAFVKDVLFPYIKENVKEYLQTHWEEECQQDVSL     |
| P24158 | HNVRTQEPTQQHFSVAQVFLNNYDAENKLNVDLLIQLSSPA   |
| O54830 | TRFLALCKLSYCLHVDIHTANFYLQFLRCVALVNSDSC LSS  |
| Q8N2C3 | HLPFLDNILEPPVKTQNLQLNKEEDLVITNTCLDRELIPSL   |
| P21912 | TLTFRRSOREGICGSCAMNINGGNTLACTRRIDTNLKNVSK   |
| P20718 | QFIPVKRPIPHPAYNPKNFSNDIMLLQLERKAKWTTAVRPL   |
| Q08DY6 | STKGPIDVYLCEVEQGS SHSNKTS DNVTGSSSKSPLEHPQ  |
| Q9UI43 | VKAAKVESYRCSRSAFKLLEVNERHQILRPLRVLDCGAAPG   |
| P51858 | EKFGKPNKRKGFSEGLWEIENNPVKASGYQSSQKKSCEE     |
| A6NJV1 | LMERASTRDRWLHKPSYTRFNLD SHRSTELTNFYQMVQQHR  |
| A3KN05 | ELVAKETLHVLKEKVTSLPDNHKNLAADI DEIVYSTSTGDI  |
| Q9QZM3 | LRLTQNYEAYSHLLCYLRGLNRQAATAELRRSLAHFCTSLQ   |
| Q8IVV7 | AFYQYAKSFNSDDFDYEE LKNGDYVFMRWKEQFLVPDHTIK  |
| O55233 | RTVFPNQTI AHEDCQKVVVQNNLCFGKCSSIRFPGE GADAH |
| Q9ZIS7 | IIPENVKAEIKASMEKHLHALNMLSGDPHRGNFIVSKDGVRI  |
| Q1WG82 | LGSCWELMVI GMSDHL SMARNPRGTQCPNLEISSATSPASL |
| Q61581 | KVKRDHSGVQRTELLPGDRENLAIQTRGGPEKHEVTGWVLV   |
| Q3TR08 | LLMWAAVIGLFCRQYDIKDNDSNNNPKEKKGPEQSPQGR     |
| Q3TTJ4 | TTSSEEQDEQSELSLLQK DENKLESEMWINHLKSKEIHSERS |
| Q3SX00 | DPNIRDSRGR TGLHLAAARGNV DICQLLHKFGADLLATDYQ |
| P61026 | TNGKSFENISKWLRNIDEHANEDVERMLLGNKCDMDDKR VV  |
| P21583 | CIYLQLLFNPLVKTEGICRNRVTNNVKDVTKLVANLPKDY    |
| P34741 | KEKVHLSDSERKMDPAEEDTNVYTEKHSDSLFRKTEVLAAV   |
| Q8VE10 | RLGDPLEAFPVFKKYDRNGLNVSIECKRVSGLEPATVDWAF   |
| Q8N0W5 | VSHFTMISRTPCPQDKSETINPKTCS PKEYLET FIFPVLLP |
| P00642 | NIRNGLLVGKRGDQLMAAGNAIERSHKNI SEIANFMLSES   |
| Q2HJF2 | LTAVAAHGRALQTLHVDFCRNVSAAGLRR LRAACPRLTLRA  |
| A7YY49 | SFVFLNLLGQLTGCILVLSRNFVQYACFGLFGI IALQTIAY  |
| Q64152 | PSLPLGSGRGRESQMKETIMNQEKLAKIQAQV RIGGKGTAR  |
| Q96BT1 | EESSSDSMDGFHESQQNQKSNLKT KVKTAFGRMLS YKYRSK |
| A6QLP7 | FEYSFIPAEPMGGRPFGLVINLNYKDLNGNVFQDAVFNQTV   |

|        |                                             |
|--------|---------------------------------------------|
| Q6GTx8 | CRGPVGVQTFRLERESRSTYNDTEDVVSQASPSSESEARFRID |
| Q9D701 | SNAAQNF TAPRKVEDRHAPANFDRNGYYLTLRANRVHYKGG  |
| Q9CQT6 | PCVKAFQERTQRYKEDQQGLNCSVANTPPLKPCSEDTVW     |
| P40313 | SWGCGIPAIKPALSFSQRIVNGENAVLGSWPQVSLQDSSG    |
| Q8VI63 | QYSTISEFCTGETCQTMAVCNTQYYWYDERGKVKCTAPQY    |
| Q9DAE8 | FGILLGYPVSYTFDLNREDDNCLTMTPLRVFTARISWLPGQ   |
| Q5EBN2 | ASCPICLDYLKDPVTISCGHNFCLSCIIMSWKDLHDSFPCP   |
| P12544 | SDTLREVNITIIDRKVCNDRNHYNFNPVIGMMVCAGSLRG    |
| Q99LX5 | QDQFNWEDVKTDKQRENYLGNSLMAPVGRWQKGRDLTWYAK   |
| Q01105 | EDIKSGYRIDFYFDENPYFENKVLKESFHLNESGDPSSKST   |
| Q2TBK2 | KAGEATVKFLRSCHLEVGMKNVWELNPEIVARHFLRNLG     |
| Q9H741 | EYCVSCLQPNKQLLLERFLNRAAVAFQNLFMAVEDHFELC    |
| Q9JIW9 | REQILRVKSEEDKIPLLVVGNKSDLEERRQVPVDEARGKAE   |
| Q920C4 | ILTLLELSVTISISAMWCLGNVCGLREAITSPPNVSESGIL   |
| Q8BVN0 | FEEQMIKYNAYVVKIKAYKDNLGEIKSQCFPMTELYEKRD    |
| P01881 | STHPMSSWLLCEVSGFFPENIHLMWLVGHVSKMKSTNFVTA   |
| Q2HJH7 | VVCREASHAGSWYTASGPQLNAQLEGWLSQVQSTKRPARAI   |
| Q9CRD0 | GELRRSSPPGHYTQKPKFDSNVSGQSSFGTSPAADNIEKEA   |
| Q9CPV4 | SKTMVGFPEDDHFVAELTYNYGIGDYKLGNDFMGITLASS    |
| A6NFK2 | RDFVRKILQKEEEAEEESLMNKEESYGGRDQHDRPLVEAES   |
| O43657 | VFLVELVAAIVGFVFRHEIKNSFKNNYKALKQYNSTGDYR    |
| P35846 | YFPTSAAALCEEIWSHSYKLSNYSRGSRCIQMWFDPAQGNP   |
| Q15040 | KGYEAVWWDKRRDVGVIALTVMGFIMNLPSSLCWGPLKLP    |
| A6QNY1 | VPNGSPSPCDIMDDCPDHKNLLNCGPQSCPEGELCCPLDG    |
| O95992 | HLLHHKVPWLYRTFHKVHHQNSSSFALATQYMSVWELFSLG   |
| P43431 | IILDKGMLVAIDELMQSLNHNGETLRQKPPVGEADPYRVKM   |
| P11911 | IILFCVVPGTLLLFRKRWQNEKFGVDMDDYEDENLYEGL     |
| Q96KX2 | FKYDLLQNQLKDIQSHGI IQNEAEYLRVLLCALKLYVNDH   |
| P56915 | CRRKRRHRTIFTDEQLEALENLFQETKYPDVGTREQLARKV   |
| Q46999 | AISNTSPNLFVPGDRIIAVNSLDGALTNEQTASGGVVVA     |
| Q9CRA5 | NNIKQRLIKKVQEAVLDKWVNDPHRMDKRLALIYLAHASD    |
| Q9QXP7 | FFSLNVHTWNQKETYLHIMKNEEVVILYAQVSDRSIMQSQ    |
| O15520 | NSSSSSFSSPSAGRHVRSYNHLQGDVWRKLFSTKYFLK      |
| Q9BUT1 | YLMIKAFLPKMLAQKSGNIINMSSVASSVKGVVNRVCYSTT   |
| A1YIY0 | CESMAEAQELFPNPELTFEFTNSEMDVILKCTIKVDPKNPT   |
| Q9NQR4 | FNLTTGPAHWELLQRSRAVDNQVYVATASPARDKASYVAW    |
| Q8TBG9 | MAHSPVMSSLNTSVVFGFLNFIWAGNIWVFKETGWHSS      |
| Q96BX8 | PGEDLNDWVAVHVVDFFNRVNLIIYGTISDGTEQSCPVMSG   |
| Q3T0U1 | SILKMTKKGKTLMMFVTVSGNPTEKETEBITSLWQGSLFNA   |
| Q5RKV6 | TRLEEERAAAGLTVALMPVLNQVAGLLSGEGGLTESWAEA    |
| Q8WVN6 | GARDSHAGLYMWHLVGHQRNNRQVTLVSGAEPQSAPDTGF    |

|        |                                            |
|--------|--------------------------------------------|
| O89116 | DANLGKSSRILTGMLRRIIQNRILLVILGIIVVIAILLTAIA |
| Q9D6J6 | VLPVLDLAQRQNGWLPISAMNKVAEVLQVPPMRVYEVATFY  |
| O09164 | LGPGSRLEAYFSLEGFPAEQNASRAIHVHEFGDLSQGCDS   |
| P27348 | LACTLAKTAFDEAIAELDTLNEDSYKSDTLIMQLLRDNLTL  |
| P68510 | AEQAERYDDMASAMKAVTELNEPLSNEDRNLLSVAYKNVVG  |
| Q9BTP7 | ADLVAGNGYRKRLVVRNNSNNLKGIVVVEKTRMSEQYFPAL  |
| Q7L0Q8 | LVSYSYTTNGYPTEYIPTAFDNFSAVVSVDGRPVRLQLCDA  |
| Q96CX3 | KQSNLTQHRLRIHTGEKPYKCNECEKAFQTKAILVQHLRIHT |
| Q64329 | ILCFLLLVTVAVLAVKIFQYNQHKQEINETLNHHHNCNMQ   |
| Q96PB8 | IQSVHKNAFNNLKARARIANNPWHCDCTLQQVLRSMASNHE  |
| Q9NYK6 | NWIVQYAQNKDLDSDSECSKNPQHHLFNFRHKPEEKLLPQF  |
| Q5NE16 | MIEQHNQYREGKHSFTMAMNAFGEMTSEEFQVVGNGFNQ    |
| P04975 | ASKVMEQEWREKAKKDLEEWNRQSQEQVEKNKINNRIADKA  |
| Q9D0L6 | YMCKSELSACFSRLDLPQNTNSPLTHGCLDSLASTADICRA  |
| Q91VR2 | ETMSIYDDIDADVQNYQYENLANLIYYSLKESTTSEQSAR   |
| Q5BIS9 | KDTGISCDPALLPEPNHVMLNHLIALSIKDGVMVLSATHRY  |
| A6NN92 | LFFGSIRIFFLGVLGFAVYGNALHFICDPDKREVNLFQYN   |
| Q99990 | LTPSSQSEGVMLKNDDSMSPNQWRYSSPWTKPQPEVPVTNR  |
| O00322 | AAAAEAKEGSPVVVGLLVVGNIIILLGSLFAETIWTAD     |
| Q2T9X7 | AAPEPEEQEERKPSATQQKNTKLSKTTAKLSTSAKRIQK    |
| Q6ZUV0 | VTMKVMDEVAGILAAHCKTNLVTASMEAINFDNKIRKGC    |
| Q96DN0 | QKFFGVSTGISTDSEVLTHYNITGNTICLFRDVDNEQNLLE  |
| Q9D270 | HCVRRMDHHCWINNCVGEDNHWFQLQCFYTELLTCYALM    |
| Q8WVF5 | EKEKEYEGKHNSLEDTDQGKCKSTLMLTNVGGYLYITQKQ   |
| Q9UKD2 | KRDKKVSLTKTAKKGLELQNLIEELRKCVDTYKYLFIQSV   |
| Q99811 | NLSEARVQVWFQNRRAKFRNRERAMLASRSASLLKSYSQEA  |
| Q32L31 | GKMSAYAFVQTCREEHKKKNPEVPVNFQAEFSKCKSERWKT  |
| Q96LD8 | LLVYLQDKNSFFHYDHSRSNSVHAKQVAEKLEAFLGRKGD   |
| Q7Z692 | TWMATTEKPELGPADAGDNNIYEVMPSPVLLVSPISDTRS   |
| Q9CY24 | AIFLILVSACILRFGTNSFCNSIISLNLTISCSEAQKTSWT  |
| P04085 | CKTRTVIYEIPRSQVDPTSANFLIWPPECVEVKRCTGCNCTS |
| Q9UBV8 | PPSSYGAQQPGLYQGGAPPNVDPPEAYSWFQSVSDHSGYI   |
| P14206 | ADHQPLTEASYVNLPTIALCNTDSPRLRYVDIAIPCNNKGAH |
| Q17QD9 | LIYSQFFPQGDATTYAHFLFNAFDADGNGAIRFEDFVVGLS  |
| P01903 | TKRSNYTPIITNPPEVTVLTNSPVELREPNVLICFIDKFTP  |
| Q15546 | MNHRAPANGRYKPTCYEHAANCYTHAFLIVPAIVGSALLHR  |
| P04095 | LVNSSLLWKNVASFPKAMRNGRCFMSFEDTFELAGSLSHN   |
| A6NCD4 | CWFGESGEIMSLPTPIKQSWNFRLNVRKEPLNPLKTIYRK   |
| Q9UK85 | SHLQIDKMTDNKTGEVLI SENVVASIQPAEGSFEGDLKVPR |
| Q96JQ5 | RGSLGMNITSSVLAASGILINTFSLAFYSFHHPYCNYYGNS  |
| Q32KP1 | VIAVGVLLLLIAVAGLVGAVNHHQVLLFFYMIILGLVFIQ   |



|        |                                            |
|--------|--------------------------------------------|
| P19473 | VKCRMIYFFHDPNFLVSI PVNPKEQMECRCENADEEVAMEE |
| Q8BS40 | SSEDARTSTLCSEAYNATLANYHSWIVRQAVTVAFCALPSR  |
| Q8BGR6 | ESPENVVSTTGFSIKAVPFQNAVLNVKELGGADNIRKYWSR  |
| O95760 | DSSITGISPITEYLASLSTYNDQSITFALEDESYEIYVEDL  |
| Q3UZZ6 | KRDAIYKRVPFMELIIPGITNGVEMLNMPSPRIVKTHLPV   |
| Q3UPR9 | SQSQDCGHSFVPAFITSSVFNKKRIIQAVSPQWSTHTKDAG  |
| Q8JZV9 | FLMIKAFLPKMLAQKSGNIINMSSVASSIKGVENRCVYSAT  |
| Q9Y337 | LLGVTEHVLANNVDSCDHFSNTVPSGSNQDLGAGAGEDARS  |
| O35622 | VSNCFLRIRSDGSVDCEEDQNERNLLEFRAVALKTIATKDV  |
| Q9NQX7 | LVFASVYIYRYFFLAQLARDNFFRCGVLYEDSLSSQVRTQM  |
| Q5Y7A7 | RWFRNGQEEKTGVVSTGLIHNGDWFQTLVMLETVPRSGEV   |
| Q3TWL2 | GKMHQHVVKCGVCNEATPIKNAPPKKYVRCPCNCLLICKV   |
| P04925 | RENMYRYPNQVYYRPPVDQYSNQNNFVHDCVNITIKQHTVTT |
| Q6ZWX2 | NPTQNVRTILLSVISLLNEPNTFSPANVDASVMFRKWRDSK  |
| Q8K2H2 | QLKQLTFKDSKIDSVAVNI SNLVLENQPRI SKAQKRREKK |
| P04467 | NELDALLKDLCEKNKQDL DINNIPTYKKSIMALSDGGKLYR |
| Q9WTY4 | IYFTGCSMNPARSFGPAVVMNRFSPSHWVFWGPIVGAVLA   |
| O75828 | PMPFDIKAEMTLKTNFFATRNCNELLPIMKPHGRVVNISS   |
| Q3ZBH3 | HEGVTSAVDKLQQEFHCCGSNSRDWQDSEWIHSGEAGGRV   |
| Q9CXT7 | NRAKPLPDVLEEEKIYAYPSNTASETGFRTVSSLEEIVEKQ  |
| Q5UCC4 | LSQRQLSEEEERGLRDVAALNGLYRVRI PRRPGALDGLEAG |
| P32243 | LPGPGATLSPMGTNAVTSHLNQSPASLSTQGYGASSLGFNS  |
| Q9D3G2 | AVPKPEVQVFTAAAEETQPLNCTQVFLSCWAFNISDITYSW  |
| Q01730 | SLAHITQLVLSHNKLTTPPNVAELKNLEVLNFFNNQIEEL   |
| Q07424 | TSPVFGSPDYSTLGPTSGASNGGSLPDAASESLVSLDSGTS  |
| Q9D7G4 | GVKTIVSKKINWIVQYQNKNDLESECSKTSQHPLLNFRH    |
| P68402 | KNGELENIKPKVIVVWVGTNNHENTAEVAGGIEAIVQLIN   |
| Q8BR90 | KSNLLQKYLVDGINYLLQMLNYRCPQLNEGVSFQDLDTAK   |
| Q8VHZ7 | AQRMNRRRHEVGALVRACKANGVTDLLVVHEHRGTPVGLIV  |
| P50592 | LACFSKTDEDFWSDTGEILNRPCLQVKRQLYQLIEEVTLR   |
| Q9JJ69 | ALREEAPREHVESFFQKMDRNKDGVVTTIEEFIESCQQDENI |
| Q505H4 | AVPECVNP IYEPQCCPVCKNGPNCFAGTTIIPAGIEVKVD  |
| Q16594 | MPTSQSPAVKASIPATSAVQNVLINPSLIGSKNILITTNMM  |
| P11032 | KGDDVKPGTRCRVAGWGRFGNKSAPSETLREVNITVIDRKI  |
| P10938 | GLAAVSSAYQRFEPRAYLRNNYAPPRGDLSCPDGVGPWKLR  |
| Q9CQJ2 | AEVDLPKLDGAQGLALEIGENRLVIGGPQQLYHLDATVFLR  |
| Q1RMU1 | GFYLHLGKCLDNCPEGLEANNHTMECVSIVHCEASEWSFWS  |
| Q91WN1 | EEAKEAELSRKELGLEEGVDNLKALIQSRQKDRQKEMDSFL  |
| Q32L00 | YSRITMEPNPHWHPVLLMLKNQIEENTGHSFNSLLCNLRYN  |
| A1YIY0 | LLASVKAEWSTKNYSCEAKNNISREISELKKFPLVVSQTAW  |
| Q96L21 | FKFPGRQKIHISKKWGFTKFNADFEDMVAKKCLIPDGGCV   |

|        |                                            |
|--------|--------------------------------------------|
| Q9CR29 | DDAGASTANVSSDRTLFRNTNVEDVLNARKLERDSLRLDESQ |
| Q3TYX2 | LKPGVAYVLCVVAANDAGESNVPGAEEVEGPNWTGPSFGPC  |
| O88992 | AISTATYTTVPRVAFYAGLKNPHEGYEVLKFDVVVTNLGNN  |
| P48739 | SLVFHEKAWNAYPYCRTIVTNEYMKDDFFIKIETWHKPDLG  |
| Q8JZU6 | SRSEVVLTFFERSPLDQVLKNDNVHKIQPSFQSPVKISEIM  |
| Q9NS61 | QIYSQFFPQGDSSTYATFLFNAFDTNHDGVSFEDFVAGLS   |
| Q7RTY3 | QTPVTFSEYVQPICLPEPNFNLVGTQCWVTGWSQVKQRFS   |
| PODML3 | SLLLIESWLEPVRFRLSRMFANNLVYDTSDDYHLLKDLLE   |
| Q99598 | LLGVADLTGELMRMCINSVNGDIDTPEFVSQFLRQVYDGF   |
| Q9BQ13 | TPLPQSPRRRPTMSTVVELNVGGEFHTTTTLGTLRKFPGSK  |
| Q99N08 | AVTVLALGIIILASVPPVPYFNSVFSVLLKSGYPFIGALFFI |
| Q99PG4 | ILKAKAIYEKFIQNDAPKEVNIDFHTKEVIAKSIQPTLHS   |
| P58340 | NMRNYMQKLERNFQQLSVDPNHGHSFCSSSVMTYSKIGDEPP |
| Q8N402 | RVKREPYSTTMLQVTSLSFINEILRRYSLYTNQHRHHGFW   |
| Q5VTT2 | PCQDDYSIVHRKCRSQFTDLNGSKRFGINTWHDESGIYANS  |
| Q9CPS7 | VHVHILGSFQNIK MARTAICNLILGNPPSKVYGNIRAVASR |
| Q96BD8 | FITCDEFNGVPSYMKSRITYNQINDVIKEINKAVISKYKIL  |
| O08583 | SQIDTQRRPAQSINRGGMTRNRSGGGGGGTRRGTRGSSR    |
| P53994 | TRRDTFNHLTTWLEDARQHSNSNMVIMLIGNKSDLESRREV  |
| O88445 | LRREVEIQAHLQHRNILRLYNYFYDDTRIYLILEYAPGGEL  |
| Q58DI5 | LGTLYCLSRSDSWAGREVLNLLFALLLDLLLVSLIKGLVR   |
| Q3MHR7 | CFASVFEKYFQFQEEGKEGENRAVIHYRDETMYESKKDR    |
| F1MM41 | DAERAPGSGGSASDSTYAHNGYQETGGGHRDGMLYLGSR    |
| Q9CPZ1 | LPQAITSERLLCHQEGRTKSNTKQENEKIKLQPMYTSGRQ   |
| P52744 | ITTSKIFQCNKYVVMHKSNSNRHKIRHTENKHFRCKECD    |
| Q29461 | GVPTYPPQLSRVVGEDARPNSWPWQVSLQYSSSGQWRHTC   |
| Q8N6M0 | LLRRHRKEKELQAKIQGMKNVAVPKNDKRRKQLTEDVAKL   |
| Q9H3S4 | ANRLYDITEGERESFLPEFINGDFDSIRPEVREYYATRGCE  |
| O95452 | MILVVAAQEVWGEQEDFVCNTLQPGCKNVCYDHFFPVSHI   |
| Q9D9C7 | GASCAPESENPAFRTHHIPVNSKLLQPLYPKRKLPLTSKENV |
| Q9H4A6 | LMEEVLLLGLKDREGYTSFWNDICISSGLRGCMLELALRGR  |
| P26884 | DSFLAEHKLGNIKNVAKTANKDHLVTAYNHLFESKRFKGT   |
| Q3ZBK8 | YQADRLQSDFAAFLVGPLQRNSLCNLLSFTYKVKPEGQSFP  |
| P41272 | SGFLIRNCTVTANAECSCSKNWQCRDQECTECDPPLNPALT  |
| Q91VF2 | ECYDLVSTMDITDCFIDGNENGLLWDFLTETCNFSKTAPL   |
| Q9ER00 | GTKQDSSKQENLQQLQHSTNQLAKETNELLKELGSLPLPL   |
| Q9BSB4 | VEVMNRHEYLKMPQTQSEVDNVFDTGLRDVPYLYKISFQI   |
| Q15907 | DEYDYLFRVVLLIGDSGVGKSNLLSRFTRNEFNLESKSTIGV |
| Q6UXZ0 | DQSVSVSVVVLNVTFPPLLSGNDFQTVEEGNSVKLVKNVKAN |
| Q8VHX2 | QDTGLPKAKECDTVNSNCPNSDDQPQGEENDFPDSTKDPL   |
| Q60660 | YYFIMDDKKWNGCKQICQDYNLTLKKTNDEDELKFLKSQLO  |

|        |                                              |
|--------|----------------------------------------------|
| Q96Q83 | RLTAWYGELPYTYSRITMEPNPHWHFVLRRTLKNRIEENTGH   |
| Q9H8W3 | SNQLATRELGVKIAKAVACHNFVKAKKEVENSQAARKKKKL    |
| Q9HD33 | GQEKVKSGAAWTCQQLRNKSNEDLHKLWYVLLKERNMLLTL    |
| O95816 | NSQDMRQISDGEREELNLTANRLMGRTLTVEVSVETIRNPQ    |
| P50053 | ATDFEKVDLTQFKWIHIEGRNASEQVKMLQRIDAHNTRQPP    |
| Q01892 | L ELAPSLEAPGGLPAYPTENFASQTLVPPAYAPYPSVLS     |
| Q9CQG0 | FGVFYEGPEVDHKQSQRKQLNDTLDAIKDSTQRVENQVFHM    |
| P47757 | PPLEDGAMP SARLRKLEVEANNAFDQYRDLYFEGGVSSVYL   |
| Q02844 | ASETFFPSGTLCWVTGWGNI DNGVNLPPFPPLKEVQVPI IEN |
| Q9CQ52 | GDIQSGCNGDSGGPLNCPADNGTWQVHGVTSEVSSLCGNTL    |
| Q9CQY8 | LMAIPATTMSLAARKRACCNNKGMFLSSLSFVITVVGAVY     |
| O14595 | RICVVIDLDETLVHSSFKPINNADFIVPIEIEGTHQVYVL     |
| P97805 | EIIMSPVRNNVGRGLNVALVNGSTGQVMKKDSFDMYSGDPQ    |
| Q9CZ04 | ANQHKEQQLGLKQQIESEVANLKKT IKVTTAAAAAATSQDP   |
| O75352 | LQSVMLELVALTGMTVYSITNNFPSSWGEALFLMLQTTI      |
| Q0VCS6 | NRKLAETLHHVAEKLCRELYNKTEHRCSPEKWKWHGDK       |
| Q64374 | ALNWENQSVFVLAMVDEDKNNRFNDGKVDPAGRYFAGTMA     |
| O75940 | LASYKAQLQQVEAALSGNGENEDLLKLLKDLQEVIELTKDL    |
| O18870 | YGNREEQNLSDLLSPTSEVANIEQNAQENENESQISTDESE    |
| P20774 | EKSLQLQKDEAITPLPPKKEDEMPTCLLCVCLSGSVYCEE     |
| P13949 | CALDRRERPLNSQSVNKYILNVQNIYRNSPVPVCRNKNRK     |
| Q96B21 | TGILAEQFVPDGPLHLHYHENHWIKLMNWQHSTMYLFFAVS    |
| Q9D7W5 | ARIGADAAQKQIQSLNKMCSNLEKISKEERESESGGLRPN     |
| Q8IZ81 | HVVQSEVDKYVDDIMKEKNINPEKDASFKICMKMCLLQITG    |
| P57052 | YRNEEMLVGRSSFPMQYFPIINNTSLPQYFYLQKMQWHVYN    |
| Q719I0 | VKESGVKHKGLIEIPNLSEENEVDDETEVSLSKKKGDGVILK   |
| O35403 | GHRNRTE NIETIDRAPFFEYNIHKLDYAKMPSPRIFSSHIP   |
| Q8SQH5 | CWRKIARDEGAKAFFKGAWSNVLRGMGAFVLVLYDEIKKF     |
| Q6S5G4 | VVSFVLDI IELFYVLFKAIKNRMRKADEVYCEDELPCPSHV   |
| P29965 | I EDERNLHEDFVFMKTIQRCNTGERSLSLLNCEEIKSQFEG   |
| A6PWV3 | QGNLLEIRQNLEKLTQI IKNFSEVACSEDCIVIEGPVLDL    |
| Q9BZ81 | GPRAYTETSKMKVLEYLAKVNDIAPGAFSSQYEEALQDEEE    |
| Q6P6M5 | IRTLGYCCQLIGGVLVEQCPNRSEVGRRLLVVSAQFNHCRT    |
| Q1RMT9 | ILVSNMLLAEAYGGGCFWDNGHLYRADQPSFAPGHSCLNW     |
| Q91YN9 | AATAVEQEKEI LLEMIHSIQNSQDMRQISDGEREELNLTAN   |
| Q9CQX5 | IGTDFWYEURSPIQENSSDSNKIAWEDFLGDEADEKTYNDV    |
| Q9WVS0 | GCILIIWFSKKKYGSSVHDPNSEYMFMAAVNTNKKSLAGV     |
| Q8N131 | SVASDSSNTTVTMKPTAASNTTTPGMVSTNMTSTTLKSTP     |
| O43752 | VRDMKDQMSSTSSVQALAEKRNQALLGDGSGSQNWSTGTDTK   |
| Q9H8W3 | HSEPSSNETQWKELTQYFGVNDRFDPVVKRKKVEKSGLEKR    |
| Q9JYT2 | NYLDNV SARVAPWCGCAASGNRREECEAFRKLFTTRNPCLDG  |

|        |                                            |
|--------|--------------------------------------------|
| Q8N699 | ILVFLSVFLLFLLFLVDIMANNNTTSLGSPWPENFWEDLIMS |
| Q6V702 | SAGKDLQDNFLTALAMREEDNRSGLSSVIFIRDRNSHGQE   |
| Q88445 | SDALTYCHEKKVIHRDIKPENLLLGLNGEVKISDFGWSVHT  |
| Q9D7J7 | RQQFTQLAGPDMEVGATDLMNILNKVLSKHKELKTEGFSLD  |
| Q05066 | RPMNAFIVWSRDQRRKMALENPRMRNSEISKQLGYQWKMLT  |
| Q8R2R5 | SGNALTHLGPLASLRQLAVLNVSNRRLTGLEPLAACENLQS  |
| Q8CEZ0 | KDETGAYLIDRDPTYFGPILNYLRHGKLIITKELGEEGVLE  |
| Q9CQL0 | VIYLEDFTFDLLQTLGHLCSNNSVILLACRIYERDSNFLT   |
| Q8N1B3 | SSIYLAGKVEEQHLRTRDIINVSRYFNPSGEPLELDSRFW   |
| Q15006 | MERYDDAIQLYDRILQEDPTNTAARKRKIAIRKAQGKNVEA  |
| Q8CCA0 | LIYRYAFDFAREKQQRSLDINTAKCMLGLLGKIWPLFPVF   |
| A2VE33 | GEPCNQTSNTTASPHQVSGNMECPACYGNNETSNETRKC    |
| Q8C996 | FAFDAILDVLSSAIVLWRYSNAAAVHSANREYIACVILGVI  |
| Q9BZX2 | DSFYRVLTSEQKAKALKGQFNFDHPDAFDNELILKTLKEIT  |
| P17433 | GSDGESHSDDHYWDFSAHHVHNNEFENFPENHFTELQSVQPP |
| Q60590 | SQTIGDQCVYNSTHLGFQRENGTFSKYEGGVETFAHLIVLR  |
| Q9J159 | GLLMLLLHYLIVALDYHKANGFSASKDHRQEVTVIEFQEA   |
| Q8BYP3 | EQLRKLRAAQLEPIITYTQGLNACEQMRGALYLECSAKFREN |
| Q8CC84 | YFKIQATGEPNSGLNATVVPNGSMTLSPVPGQAPRLAIPVP  |
| Q9BV99 | LTHLGPLASLRQLAVLNVSNRRLTGLEPLATCENLQSLNAA  |
| Q96LT6 | FGILGYPVPYTFHLNQDDNCLALTPLRVFTARISWLLGQ    |
| Q6PEB6 | IYRIFSHAYFHHRQIFDEYENETFLCHRFTKFVMKYNLMSK  |
| Q9QXV3 | SQELGDEKIQIVSQMVELVENRSRQVDSHVELFEAHQDISD  |
| Q9BXJ1 | FNMFTGKFYCYVPGLYFFSLNVHTWNQKETYLHIMKNEEEV  |
| Q3T127 | NVYVKFRREEDAERAVVELNRFNGQAVHAELSPTVDFRE    |
| Q91XQ6 | YQIFDFALNTLVAITVLVYVNSIQEYIRQLPPSPFYRDDIM  |
| Q6QUN5 | TLAEGQTLKVSCTNTNIYSNSQKAWQRLKDNQGEVQTLAIT  |
| O08709 | KGRDLAAILGMLDPVEKDDNNMPVTARVVFIFGPDKCLKLS  |
| Q86UV7 | VIEALRLPGDPEPKVCVHHRNPLSLFCEKQELICGLCGLL   |
| P46777 | GLTNYAAAAYCTGLLLARRLLNRFMDKIYEGQVEVTGDEYN  |
| Q32LB6 | SGSSLFKTQCVVPPKRRQRNTIRKRVHIPKNTQATESSSD   |
| A6NM15 | PGNAKEEHLNMFIQNLLWEKNVRNKDNHCMEVIRLKLVS I  |
| Q96G30 | VIFMFFVLTLLTKTGAPHQDNAESSEKFRMNSFVSDFRGP   |
| Q9D305 | RRATRRIKATCFVKSLEASNMLPKGISEQILPTALS NLPL  |
| Q0P5E4 | VWRLITNFFLFFGPLGFSFFFNMLFVFRYCRMLEEGSFRGRT |
| O35047 | MQKEIQELKKECAQYTERLKNIKAATNHVTPEEKVYRDR    |
| Q6IRU2 | AEERAEVSELKCGDLEELKNVTNNLKSLEAASEKYSEKED   |
| Q3T0I4 | RGRAGSQGGRGGAQAAARVNRGGPIRNRPAIARGAAGGG    |
| Q29RZ1 | AEGVSAQSFLHCFTLASAFNLQVATPGGKTMDFVDVNESN   |
| Q9CPQ5 | EIDKIVETTESMTESIQLKNKIQILTSEVEEEEQEVKQVF   |
| P08508 | HNGRSIRSQVQASYTFKATVNDSGEYRCQMEQTRLSDPVDL  |

|        |                                              |
|--------|----------------------------------------------|
| O08859 | KECGGVFTDPKRIFKSPGFPNEYDDNQVCYWHIRLKYQRI     |
| Q3T144 | RNSNFYSVAVTSLSSEVQYMNVTVGSYTTTNIISLIPRSEH    |
| P30301 | YYTGAGMNFARFAPAILTGNFTNHVVYVWGPIIGGGLGSL     |
| Q15116 | CSFSNTSESVFLNWYRMSFSNQTDKLAAFPEDRSQPGQDCR    |
| Q9JJK1 | SWNAGVADRYGRLDRELQLANSHFIEEQQAQQQLIVEQQDE    |
| Q9BPW5 | LHQHVQQLHLGTRLFPVVVANKADLLHIKQVDPQLGLQLAS    |
| P28068 | LRNGLQNCATHQPFWGSLTNRTRPPSVQVAKTTPFNTREP     |
| P28067 | LPHSWAVPEAPTPMWPDDLQNHFTLHTVYVQDGSPPSVGLSE   |
| Q6NTF7 | FKPFADCWENFVDHEKPLSFNPKMLEELDKNRAIKRRLLE     |
| Q923S9 | KLFLDLACRLISEARQNTLVNNSVPLPGEKKSISYLTCCN     |
| P30931 | YTLYYKASSTGKKKATTNTNGFLIDVDKGENYCFHVQAVI     |
| Q08E08 | DFQHQATIFLQVVDKLEEVNDNTVTLIIILGVVGGVIGLLIFI  |
| Q3T123 | QQVSALPPPPMQYIKEYTDENIQEGLAPKPPPIKDSYMMF     |
| O75871 | RTINASYDSQATGQLHVHQNVPGLPVGAVAGIVTGVLVG      |
| Q96CX3 | HQRSHSGDKPFKCNCEGKAFNQSAQLMQHQRHSGEKPYTC     |
| Q46669 | LGIRIGNDAFFTAHAIAMRNNDAPALVEEVYNFFRDSRPV     |
| Q9NQM4 | KDSSTGCCSELVAKIKLPNTNPSDIQIDIQETILDLRTPQK    |
| Q8N2A8 | VDKRVLITGSLNWTQAIQNNRENVLITEDDEYVRLFLEEF     |
| Q61205 | LGLLPRGQHPNPLREKNRQVNELVRAALAGY PRAHFLDADP   |
| Q3T168 | GSSKKVKTDTVLILCRKKAENTRWLYLTVQVEKECKEKEKPS   |
| Q60660 | LRQEYQVMKNDSSLMEMLRNKSSECKALNDSLHYLNREQN     |
| Q3T123 | KREEKLEDLKLFLFVHVHHLINERYRPHQARETLRVMMEVQKR  |
| Q86YB7 | ALAGPDQGITEILMNRPSARNALGNVVFSELETLAQLRED     |
| Q96G21 | EEAQRSAQERKERLRRALEENRLIPTELRREALAQGSLEF     |
| P08311 | RRENTQQHITARRAIRHPQYNQRTIQNDIMLLQLSRRVRRN    |
| Q53H82 | VTHWRHDHSGGIGDICKSINNDTTYCIKKLPRNPQREEIIG    |
| Q8NDZ9 | GPGRTPAEFPAAGPSRRELNRNGSYLSTVFTARLWAADRAGG   |
| Q8BGY7 | HLITSGIWFGTFFYYATIRGVNVI PFLEVI GLPDSIVDILKN |
| Q8BVP6 | SPPGVSIASYSRVCRSYLCNNLTNLEPFVRLKASQPMSTLP    |
| Q9QYB1 | KGMTGIWRYLTNAYSREFTNTCPDKEVEIAYS DVAKRLT     |
| P23463 | RIEVSHTLALTERQVKIWFQNRMRKWKKENNKDKFPASRPE    |
| Q9D7N2 | YGCRPSGCVTYGPQTIHIVSNLRLPLQPVCGGCQPSIPVFG    |
| P14207 | HTSHTCKSNWHRGWDWTSGVNKPAGALCRTFESYFPTPAA     |
| Q921Y0 | AHIYHQHFDSVMQLQEEAHLNTSFKHFIFFVQEFNLIDRRE    |
| Q9BRN9 | TVRDHVHCLGNRTFPKMLYCNWTGGYKWSTALALSITLGGF    |
| Q14681 | SYNYGNEDQAEFLCVSRELNNSTNGIVIEPSEKAKILQER     |
| P02817 | QPMMPVPGQHSMTPTQHHQPNLPLPAQQFFQPSIQPFHQ      |
| Q92876 | CGGVLIHPLWVLTAAHCKKPNLQVFLGKHNLQRRESSQEQS    |
| Q96KN4 | GRVVNSWYRYPPLVAELVVQNACGHLGLKSEEICWTNSESF    |
| Q9R1P0 | QVEYAMEAIGHAGTCLGILANDGVLLAAERRNIHKLLDEVF    |
| O60238 | SSHLVEPPPPLHNNNNNCEENEQSLPPPAGLNSSWVELPMN    |

|        |                                             |
|--------|---------------------------------------------|
| Q8BU85 | TRASAAAFASAGDTTAMSAFNLLHLVTKSQPVAPRACGLPS   |
| P10746 | LAEYICRESSALPLLPCGNLKREILPKALKDKGIAMESI     |
| Q9QYI7 | RVFPSTGFGFPAPMEALSSFNTLGHGGGSRSTFSSASFGGS   |
| Q8TAP8 | QLRKSQFQIRCGLEESVSEGLNVPRSKRFLRDLVSLQVPPEEQ |
| Q80WR5 | LDPKSDISSLPKQVAPVAPCENKFAEDSAEAAVSVPEBREPP  |
| P36368 | TPTRWQKPDLLQCVFITLLPNENCAKVYLQKVTDVMLCAGE   |
| Q9DCH6 | HSQAPMLCSTGCGFYGNPRTNGMCSVYKEHLQRQNSNGR     |
| Q91XE0 | KFWLFGGNERSQRFIERCIKNFSSCVLGPETPASWTIMD     |
| Q9NPC8 | KRELAEATGLTTQVSNWFKNRRQRDRAAEAKEKRENNENS    |
| Q924N9 | VSKRFDLALMQLTALLVTSTNVSPVSLPKDSSSTFDSTDQCW  |
| Q96AX2 | YRDAQALLLLYDITNKSSFDNIRAWLTHEIHEYAQRDVIIML  |
| Q6PIV2 | PKLPLEKKPNPKDGDYEPNLMMWVNPVYPPGKLEVSG       |
| Q9Z2F7 | GLNSSWVELPMNSSNGNENGNKNGGLEHVPSSSIHNGDM     |
| Q9BSJ6 | ALGSLCRQFQRRPLRAVNLNLRAGPSWKRLTPEPGQQGL     |
| P17677 | TRKKLKGKDDVQAAEAANKKDEAPVADGVEKKGEGTTT      |
| Q8NDY6 | EQRSLRLSINARERRRMDLNDALDGLRAVIPIYAHSPSVRK   |
| Q96L14 | DESLNFQKIPPLVHSKTPEGNGRSGDPRPQAAEPPDHLTI    |
| Q8BFQ8 | NLQVATPGGKAIDFVDVTESNARWVQDFRLKAYASPAKLES   |
| P04769 | AIEAKNKDLLEYIIRIISKVNPAIKENEDYPTWSDLDLKS    |
| Q32KU6 | KIQSMLHCCGVTNYRDWKTNYSEKGFPECCLEDCSPQ       |
| Q8R0A6 | RRMQAFEASPMWLQDTKPRKNASSVVPSSVHNSANQRMHST   |
| Q95106 | FEHVIEELDEDDQKVRPSEENKADAMYTSRVMLSSQVPLE    |
| Q6IPR3 | DQFFTSSCAGRILLDRGINGFEVQKNCWLLVTHKLCV       |
| O08899 | SVQATKEVNLDSTREETSRNMLQPTITCFDEAQKIFNLM     |
| Q32L52 | RTLALLAFDNPEDSPFGDLLNMQRQKQVWSEVNVQAVLDYEN  |
| P19157 | SQNQGGKAFIVGDQISFADYNLLDLLLLIHQVLAPGLDNFP   |
| Q9D287 | VREAAAALVEEETRRYRPTKNYLSYLTAPDYSAFETDIMRN   |
| O08602 | GECLTQPLKDLKQKLRNKVSNTKVDTHKTNGYPHLQVTMIY   |
| P14106 | SPLRPNQVIRFEKVIITNANENYPRNGKFTCKVPGLYYFTY   |
| Q6PGD0 | LMQARCCLNQKGTILGLDLQNCSLKDPGFNFQAYTAI IID   |
| Q2TBQ5 | ARLGRVHRKTCTTVAFTQVNSDKSALAKLVEAIRTNYND     |
| P13810 | EFKGGVCISATNVLSKYDLNFKKLLKRRRLALTFMSEDDF    |
| Q96B21 | RLVMAVAVFMEGFLFYHVHNRPLDQHIHSLLLYALFGGC     |
| Q8NAJ2 | ALSDKPHLSGEVGEACSSWNPPPLFSRPLPRLWPLPGTFF    |
| Q3S219 | SIAGLQVDDEILEFGSVNTQNFQSLQNIQSVVQHSEKPLN    |
| P11836 | LSIMDILNIKISHFLKMESLNFIRAHTPYINIYNCEPANPS   |
| Q6PIL6 | EIYSQFFPQGDSTTYAHFLFNAFDTDHNGAVSFEDFIKGLS   |
| Q504P2 | LQENVFLQKHNLSKIKNLSAMLQSTATQLCRELYSKE       |
| P70122 | LKEKMKIERAHMRLRFILFVNEGKKEKLEKPLMKVVESED    |
| Q9R1A9 | VRTLQGFLSRQEGPICLVAHNGFDYDFLLCTELQRLGAHL    |
| Q2TBR5 | SSMVPGYTGFVPAQFIFAKNCSQVWAEALNGFTQRNGGQG    |

|        |                                            |
|--------|--------------------------------------------|
| P09067 | LSGSYRDPAMHTGSYGYNYNGMDLSVNRSSASSSHFGAVG   |
| A1YQ93 | AMPAEVSPLYLQKEMINFQHTNAGIFIPSTSQKPSSTIFFTS |
| Q495Y7 | AGLPSWQYQCIHFFLALYLANDMEDEDEDPKQNIIFYFLYGK |
| Q3SWZ3 | DIRAQLKAIEPQKEADENYSVNTRMRKTOHGVLSSQQFVE   |
| Q9BSD3 | IQTPESSSVKEELIPQDQKENSLLSCTLHTGTPNSPEPGPV  |
| Q9Z1L2 | SLEEGSVVLTLSPSSTSPSNPPIITGPNLSYTSALSAPYM   |
| Q9NXI6 | DLAAGHPSLVGEDGQDEVSANHVAAARLAAHLLLLALLIIL  |
| Q9EQQ2 | IWQKTLTVLHPLRAADGSIMNETDLAGPVVFLAFGATLLL   |
| Q8N7B6 | LSTSSPESARKLHPRPSDKLNPKTINPFGEQSRVPSAFAAI  |
| Q28030 | VAVKFLNVTNVEVNVECRINAANIATDDERDKFAPRVAFK   |
| O75558 | ISRAQYNALTLTFQRAMHDYNAEMKQRDNCKIRIQRQLEI   |
| Q58CX6 | ASAKAQHLPAPITSASRMQSNRHVMIKLDTSARPAGKAI    |
| P51153 | DKLAREHGIRFFETSAKSSMNVDEAFSSLARDILLKSGGRR  |
| Q9D035 | ICFYLEVQQLSQDRDFIMTFNTSLHRSWWMENGPGLVTPV   |
| Q8WWZ3 | DELCFLEQRQPQSPTLEFLLRNSQRTVGLMELCRLYHRADV  |
| Q3ZCH9 | EPEETVMIGDDCRDDVGAQNAAGMRGILVKTGKYRAAEDK   |
| P13378 | RIEVSHALALTERQVKIWFQNRMRKWKKENNKDKFPVSRQE  |
| P56965 | DGGDVLFTGREFFVGLSKRTNQRGAEILADTFKDYAVSTVP  |
| P81126 | IEKAI AHYEQSADYKGEESNSSANKCLLKVAAYAAQLEQY  |
| Q8TEA8 | QQQRKEKTRAKGPSESSKERNTPRKEDRSASSGAEGDVSSE  |
| Q9CY66 | RGGFNRRGGGGGFNRGGGSNNHFRGGGGGGGGSFRGGGGG   |
| Q8BW74 | PYDGDTFQLEYMDLEEFLESENGIPSPSQHDHSPHPGLQP   |
| Q1JPH6 | SQKELPTEPPYTAYVGNLFPNTVQGDIDAIKDLIRSIVRL   |
| Q5QGZ9 | MRVDNIINSSAWVIRNAPDLNNMYCGYINRLYVQYYHCTYK  |
| Q5XFR0 | VRQLLSPETVDCFFSRTSKENVEADHRSVFGVGNVDYGGSA  |
| Q9P0L0 | DRKVCFKVKTAPRRYCVRPNSGIIDPGSTVTVSVMLQPPD   |
| Q9NVL8 | INKQSPRDHKAKKTLQSTFRNDDHDLTMLPDEIILNRGFGN  |
| Q5QGZ9 | TWQESKMACAAQNASLLKINNKNLEFIKSQRSYDYWLGL    |
| Q9H160 | KRSKAKQEREASPVFAIDPNEPTYCLCNQVSYGEMIGCDN   |
| Q9NYW7 | FLFAVLLLI FSLGRHTRQMRNTVAGSRVPGRGAPISALLSI |
| Q32L47 | KGEDFESMDATKLSRFIESNNLRLVTEYNAITAIGLFNSMI  |
| Q92915 | MHPDGDGTKDDSTNSTLFNLPVGLRVVAIQGVKTGLYI     |
| Q8MKH6 | KRQTGREMKLRILSERKKPLNIDHMGEQLREKAQELSDWI   |
| P52946 | LHHHLPAQLGLAHPPPGPFNGTEPGGLEEPNRVQLPFPWM   |
| O75489 | TNAQFKSLVDLTAVDVPTRQNRFEIVYNLLSLRFSRIRVK   |
| P02663 | QFYQKFPQYLQYLYQGPIVLNPDQVKNRNVPIPTLNREQ    |
| Q148F6 | GLTRMFAPTLPSDLLVNVYINLNKLCCLTVYQLHTLQPNSTK |
| Q1JP75 | DWEATEQALGGVGPVDDLNNAAVAFLOPFLEVTKREAYDMS  |
| P51148 | ADLASKRAVEFQEAQAYADDNSLLFMETSAKTAMNVNEIFM  |
| Q9BQP9 | GLIKHNAESRIQNIHFGRDLNASHQVAPGLVWGLISGRKHQ  |
| Q8N9P0 | GWGRGMTRICPLCPGAPEYINSVSSQTLQSCTPPQSPQP    |

|        |                                             |
|--------|---------------------------------------------|
| Q924N9 | LPKDSSTFDSTDQCWLVGWGNLLQVRVPLQPPYQLHEVKIPI  |
| Q2HJ38 | PKLGTDQPLDQATISLQMGTKGASQAGMTAPGTRQIFEP     |
| P09671 | GWGWLGFNKEQGRLQIAACSNQDPLQGTGLIPLLIDVWE     |
| Q6Q8B3 | AQISWIPEGSLATKQEYWGNGTVTKSTCPWEGHKSTVTC     |
| Q9CRA8 | LRPKIGLPGVAEKSRERLVRNTEAVVLGALHPRSTSITVVL   |
| P52801 | TPPNLVDRPCLRLKVYVRPTNETLYEAPEPIFTSNSSCSGL   |
| P26717 | IVLMATVLKTIIVLIPFLEQNNSSPNTRTQKARHCGHCPEEW  |
| P15927 | VLNLIKACFRPEGLNFQDLKNQLKHMSVSSIKQAVDFLSNE   |
| Q2TBV3 | KIRVKPDKTGVVTDGVKHSMPFCEIAVEEAVRLKEKKLVK    |
| Q9BX74 | QYICKDPKINDATQEPVNCTNYTAHVSCFPAPNITCKDSSG   |
| Q9Z1R4 | KSTKADLPAPEPRWVDSSENSGSDWDSAPETMGDVGPLKT    |
| Q9BQR3 | FCGGSLIAEQWVLTAAHCFRNTSETSLYQVLLGARQLVQPG   |
| Q9D8Z6 | EQERQICREKVGEKLECEKIIINIVEVMSRHEYLPMPTQSEV  |
| Q0VCM2 | YEYYAEPVTSLPAPFLAMPFNLSLVNMAVFLGVYWLRSQAR   |
| Q96S21 | LHLAFKRQVPTEQARAYAEKNCMTFFEVSPLCNFNVIEST    |
| Q9Y320 | DFDWREVEILMFLSAIVMMKNRRSITVEQHIGNIFMFSKVA   |
| Q5U649 | HQSAKEVFKSAHTPVIISVLNSSNILGSLLESSLSHLMKFPI  |
| P97469 | QPKLSDPHAIIEAEKFQCNCNKTYSTFSGLAKHKQLHCDAQ   |
| A6H759 | NKLGITFLTRNYCLAELYLNNAIFDIEGLHYLPSLHILL     |
| P35283 | KLVDLILKKMPLDVLRLNELSNSILSLQPEPEIPPELPPPRP  |
| P43166 | LTDALYMRVRFKGTAKQFSCFNPKLLPASRHYWYTPGSLTT   |
| Q3ZBG4 | VNTEVTRRLGLHLANCMTQINAMTYPGPHPALQAPPPPPP    |
| P97950 | VPKVLVGNKCDLREQIQVPSNLALKFADAHNMLLFETSAKD   |
| P0CI32 | AAKVASLRQRFGEHILAVEGNVTCYADYQRAVDQILTRSGK   |
| P15328 | CKEDCEQWVEDCRTSYTCKSNWHKGNWNTSGFNKCAVGAAC   |
| Q9H8W3 | RKKVEKSGLEKRIQAVEEWNIEKAEELSNQLATRELGVKI    |
| P28063 | LYYLRNGERISVSAASKLLSNMMLQYRGMGLSMGSMICGWD   |
| Q8NBI2 | FSLKNTTRPYHSLPSEAVFANSTGMLVVAFLLVLYILLAS    |
| O43513 | QEGLAPKPPPPKDSYMMFGNQFQCDDLIIRPLESQGIERL    |
| P08074 | MLTKAMAMELGPHKIRVNSVNPTVVLTDMGKKVSADPEFAR   |
| Q8BNI4 | VDLLGIAVGHYFFLEDIFPNQPGGIRILKTPSILRTIFDT    |
| Q5E948 | YFAGKLSYVKTCQEKFKLENLSPLEALRSGQARRSSPTGH    |
| Q32LJ6 | RHEVLTRTAFLAEDFNAEEINLDCTNPRYLAAGSSNAVKLS   |
| A7MBB3 | FWAIAGIWTVFSLAVVNKAVNLTDGFPYISVCGNVPPQSCI   |
| Q9R0Q9 | ASNVPAVVVGKLLQAATNYRNGHTGQLSAITVFMLFGGSLA   |
| A6QP66 | AEQSLEVEMMFIRIIRDILTNFKLEKRRYSKSKMAKLIN     |
| Q8SQ24 | NRGSKMFKLRQLRVEKFTYENHPDVFSDSSMDRFQKFIPTV   |
| P54797 | VWCRCASYGTRTNTIILVDANGHVTFTERSMLDKDTSRWET   |
| Q96PB8 | CPKGCLCSSSGGLNVTCNSANLKEIPRDLPPETVLLYLDNS   |
| Q9D7U6 | SLLGWVLSCLTNYLPHWKNLNLLELNEMENWTMGLWKSCVIQ  |
| O43482 | HLAWDLRSRLGAVVFSRVTTNNVVLEAPFLVIGIEGSLKGSTY |



|        |                                            |
|--------|--------------------------------------------|
| Q60994 | PPPKGTCAGWMAGIPGHPHNGTPGRDGRDGTGPEKGEKGD   |
| Q9NWU2 | ENRESTPKLAKLLKLLWAQNELDQKKVKYPKMTDLSKGI    |
| P10415 | PFTARGRFATVVEELFRDGVNWGRIVAFEFEGGVMCVESVN  |
| Q6GV28 | LWALILYHNKQKQSMHFSNYRITWIMYATYLVNFVFLSVC   |
| P36368 | PGFNMSLLMLQTIIPGADFSNDLMLLRLSKPADITDVKPI   |
| Q9Z2G9 | DSWASGYAVPVVTVVRAMLNNLVSPSSQMELLENKAILHL   |
| Q0VCS6 | YQFYKESKSWQGEYFCIAENSTMLKINTQEVLEFAMPQSY   |
| P32043 | SITFPPPPAFSNSLHGVDMAANPRAHPDRFACSAAPGHAL   |
| Q2YDI9 | AAASSRRPADGAGAPSRVRQNFHPDSEAAINRQINLELYAS  |
| P46412 | FGLVILGFPSNQFGKQEPGENSEILPCLKYVRPGGGFVFNF  |
| Q8WW14 | APKLPVNSEETVLQALHQYNLQYHPLILECKYVKKPLQEP   |
| Q9NUL5 | MKQDRDIQAVATSLPLTEANLRFQRAQDDLI PAVDRQFA   |
| Q99N09 | QIMCAVMVLSLGIILASVPSNLHFTSVFVSVLKSQYPPFIGA |
| Q9UEU0 | LGEQRDQLERTKSRVNTSENLSKSRKILRSMSRKTNNKL    |
| Q6SP97 | AAMKRLSDEEREAVLQGLKKNWEEVHKEFQSLSVFIDSVPK  |
| O95813 | RTVPFSQITHEGCEKVVVQNNLCFGKCGSVHFGAAQSHH    |
| P23463 | YKAAAAAAAAAAAAAGEAINTPTYYDCHFPEVSGRHAAAL   |
| Q61200 | KFKKMFVGWDFHSNIKTVKLNLLITGKIVDHGNGTFVSYFR  |
| P11245 | LQTPGVYCLVGFILTYRKFNYKNDTDLVEFKTLTEEEVEE   |
| Q9HBV2 | NDSETAENYAPPETEDVSNRNVVKEVEFGMCTVTTCGIGVRE |
| Q5E958 | HTVRVRGGNKRYRALRLDVGNFSWGSECCTRKTRIIDVVYN  |
| Q2M2D7 | QRFVVKQQLCDILVAYSAYNPVSIIPGQRYSWYLCPYSQAW  |
| Q7L2Z9 | EILALIPNQALLKDLDDI LHNSSQMKSMSTFIEEAYKKLDA |
| P61587 | STLVELSNHRQTPVSYDQGANMAKQIGAATYIECSALQSEN  |
| Q8NHM4 | CYKPHIQVRLGEHNEIEVLEGNEQFINAAKIRHPKYNRIIL  |
| Q61199 | LLVVPGLLQLLFCDSSEVIHNTESVDWEDRTVPETLVGNLF  |
| P35232 | IGKFGLALAVAGGVNSALYNVDAGHRAVIFDRFRGVQDIV   |
| Q2TAA2 | LCETAWEEQCI IQGCKLNRLNSVGEYANACLQVAQDCGTD  |
| Q8VEJ3 | VTLGLSWFCSPLAALVLDFNNIKSSADVQGAGKGLCASP    |
| Q2HJ98 | AFVPKEKIPDPHNKLLWLKVNKELRQEGETSMMIFSIPIII  |
| Q9DBD2 | LFMYVQCKVYLQLWKRKAYNRVIYVQNCPETSKKNIFEKS   |
| Q3ZCB8 | PPSPVTDPTMLTDMKGNVTNVLPMILIGGWINMTFSGFVT   |
| Q17QF9 | SFVAPVRGVYSFRFHVVVYVNRQTVQVSLMLNTWPVVSFAFA |
| Q8CF98 | GVNDLEREGQYVFTDNTPLQNYSNWKEEPPSDPSGHEDCVE  |
| Q61199 | VDHGNGTFSVYFRHNSTGLGNVSVSLVPPSKVVEFEIS PQS |
| P0C1Z6 | IVLEDEGSQGTDAPTPGNAENEPPEKETLSPPRTPAPPEP   |
| P97805 | WVFGAKDLKSKSPYEQFLKNNPETNKYDGPPELLELEGCV   |
| Q9H867 | DISGFETCICCYEQRTMGKNPEIEKKYFELLQLDFDFEKI   |
| Q04917 | LETVCNDVLSLLDKFLIKNCNDFQYESKVFYLMKMGDYRY   |
| Q96KX2 | SKEYLIACIEDHNYETGECWNLWKSXWIFQVNPFLTQVTG   |
| A8MXD5 | LGSDGQQNGHIESEGDEENENDQDSLLVLARAASEKGFGR   |

|        |                                            |
|--------|--------------------------------------------|
| Q14972 | TLQNVKERALLPKFLLRGLNSTNCVITQPLTGELVVESE    |
| Q14331 | PVFQNGKMALLASNSCFIRCNEAGDIEAKSKTAGEEEMIKI  |
| Q969T4 | ELAEITLDPPPNCASAGPKGDNIYWRSTILGPPGSVYEGGV  |
| P17751 | TAYIDFARQKLDPKIAVAQAQNCYKVTNGAFTGEISPGMIKD |
| Q9JIK9 | VPKHEEEAFTAFTAKPEDRLNSVPPPLLRAMILAERQKNG   |
| Q3T075 | STYDSTCQIAQEIAEKIQQRNQYERNGENTTKLTVTIRALL  |
| P21266 | DVKFKLDLDFPNLPYLLDGKNKITQSNAILRYIARKHNMCG  |
| Q9D8B1 | VFFGICVLTDLSSLLTRGSGNQEQERQLRKLISLRDWTLAV  |
| Q5E9Q4 | ESVLCVKPDVHVYRIPPRATNRGYRAAEWQLDQPSWSGRLR  |
| Q0VC21 | AKVNEVQLASELATAAIEKNGGVVTTAFYDPRSLEILCKP   |
| Q91XR9 | LVDLHARYAECGLRILAFPCNQFGRQEPGSNQEIKEFAAGY  |
| Q9CR68 | CRESLSGQAAARPLVATVGLNVPASVRFSDTKVVPDFSDY   |
| Q9XT56 | THGDIRGLVCYNNKITASYENRVTFSDTGITFHSVTRKDTG  |
| P97950 | DLREQIQVPSNLALKFADAHNMLLFETSADPKESQNVESI   |
| A6H6X4 | SRWEKEQLTPRETTFLEITDNHDSRQGLRIFCNAPDFISKI  |
| O88456 | TAMRILGGVISAISEAAAQYNPEPPPPRSHYSNIEANESSE  |
| Q6P1K2 | FIAQLQTSIREEISDIKEEGNLEAVLNALDKIVEEGKVRKE  |
| Q15771 | CEESFRCLPEWLREIEQYASNKVIITVLVGNKIDLAERREVS |
| Q5TZF3 | WGRLETLKALVELDVIDEALNFRERARDVAARYSQTECVE   |
| Q9BU20 | LADGRTLDRAGLADVAHILNGLAEQLWHQDQVAAGLLFNP   |
| Q0IIIO | YNSQPSVSLRDFKQLKCKWENIKARTKKIMAHERREKVKRS  |
| Q7TMY4 | RRKQPHVLLSTTHELQQTLENDKLESEVDEAQESTMEADPK  |
| Q2HJ67 | GSDSHHGKNSLGNSSGASANAGSTHISREGVGTASGAEE    |
| Q9D9R0 | VRTRCGHVFCRSCIATSIKNNNKWTCPCYCRAYLPSEGPAT  |
| O08583 | ADALKAMKQYNGVPLDGRPMNIQLVTSQIDTQRRPAQSINR  |
| P20339 | YADDNSLLFMETSAKTSMNVNEIFMAIAKKLKNEPQNPFGA  |
| Q12918 | IYWQLREKCLLFSHTVNFWNNSLADCSTKESLLLIRDKD    |
| Q8NC54 | QEEADNNEPDSIEEEDLLMNSSPSTAKDTLDNGYGEFDY    |
| Q8CFI2 | VTLVDEGDLYNWEVAIFGPPNTYEGGYFKARLKFPIIDYPY  |
| Q27956 | AHGLHSKLSTTADVLRGLLSNVLCRLCSKYHVSHVDVTYGP  |
| A4D161 | IRCRCXHFADQHSAAFGFTCNTCSKCSGFHSCFTCACGQPA  |
| P67870 | RQALDMILDLEPDEELEDNPNQSDLIEQAEMLYGLIHARY   |
| P09067 | RIEIAHALCLSERQIKIWFQNRMRKWKKNLKSMSLATAG    |
| A2VDN0 | DTYRLRRRATRRRINKREAKNCNARHFENTFVVETLICGV   |
| P22794 | RLWANSTSSWDSVIQNKTRGNQENINTNPITPEVDYKGENS  |
| H3BNL8 | PSAETYFHEEKIVVLGQVLMNESLPIEKRAQAAQKIGLLAF  |
| P34022 | FEECRKEIEEREKKGPGKNDNAEKVAEKLEALSAREAREEA  |
| Q5E9Q4 | NPDQGPKLDSLFSKEGQTIKLNIAKMKKDGAAAGTPRARPTS |
| A6QLP7 | SFRYPQDYQFYIQNFTALPLNTVPPQRQATFEYSFIPAEP   |
| Q9TU47 | EVFRQTVADQVLVGSYCVFSNQGGLVHPKTSIEDQDELSSL  |
| Q9JL25 | HNKAENIYKAFVHSDAVKQINIDFHTRESTAKKIKTPTPTS  |

|        |                                             |
|--------|---------------------------------------------|
| Q6UX65 | CSSVLHSGNFGTDLEQKLHWNPEDKGYVLHMITTAEWSMS    |
| Q9P0I2 | GIELLTLDASWSSASWYFLNVFGLRSIYSLILGQDNAADQ    |
| Q8NBL3 | RCTAIKYHFSQPIRLRNIFFNLTKTIQQDEWHLHLRRTA     |
| Q7TS73 | PVFFGESIEVDPEPAHEIRCNSEITYASERYFRDKIFYAPV   |
| Q96NF6 | VTTQVCIMPARLSLGSISRNLRLSVCHFTLLLPFRSLRP     |
| Q1RML4 | FQFVSKNKEKLAQLWGKRKGNRKTMTYQKMARALRNYGRTG   |
| Q08091 | RFEPEKLEGRNIIGLQMGTKNFASQQGMTAYGTRRHLYPD    |
| P35802 | FMLAWLGVTAFTSLPVYMYFNVWTICRNTTLVEGANLCLDL   |
| Q9DAZ2 | KEQSLVRTPETLLTLVHSLLSWTNALNHLVNEMSTMQGDT    |
| Q15116 | RVTQLPNGRDFHMSVVRARRNDSTYLCGAI SLAPKAQIKE   |
| Q9JI59 | YIWFKDGTSLLGNPKGGTHNNSYTMNTKSGILQFNMISKM    |
| Q9D5K1 | WRLARGIISTNDELFRPFRANSFFIGFKPAYEYNAGTYRCD   |
| P00492 | EDIIDTGKTMQTLTLLSLVRQYNPKMVKVASLLVKRTPRSVGY |
| Q0VCV7 | GPHPAKTPARPVGTSEPKSANLCGNRTY GKALMPVARISV   |
| Q62189 | IATMPVPETRANHTIYINNNEKIKKDELKKSLEYAIFSQFG   |
| Q9BUV0 | DRMELLEIAKTNAAKALGTTNIDLPA SLRTVPSAKETS RGI |
| Q2KHU3 | LKNVQLPEVTINEETALAEVNLKKSCLNIRTHPVATSFVAV   |
| P41220 | EKMKRLLKDWKTRLSYFLQNSSTPGKPKTKGKSKQQA FIK   |
| P11352 | KNEEILNSLKYVRPGGGFEPNFTLF EKCEVNGEKAHPLFTF  |
| P50591 | ALGRKINSWESSRSGHSFLSNLHLRNGELVIHEKGFYIYS    |
| Q19137 | QQTQPPTKRTQPQVIGVMQSQNSSAGSRGPRPLEQVTCYKCG  |
| A2VE33 | IQCNSLKDSCVAKNATECPSNATTSCTSFSSTNFYHGEHPTW  |
| Q6PID6 | SKVTSQQFEAAAEKDVVDNDEGNWLHAIKRRIKKEILLEGC   |
| Q62348 | LHISTFINELDSGFRLNLKND SLRKRYDGLKYDVKKVEEV   |
| Q96A37 | PIPSNIPNRSTFACPYCGARNLDQ QELVKHCVESHRSDPNR  |
| A4IFA7 | GLVGFSRALAKEVAKKKIRVNVVAPGFIHTDMTKDLNEELL   |
| P00642 | LTAANYGMPINSNLCINKFVNHKDKS IMLQAASIYTGQDGR  |
| Q14AM7 | ASISVRSSTPGSPTHVSSGPNASRRRNLHDVDLNTFITTEE   |
| P49862 | VYKDLENSMLCAGIPDSKKNACNGDSGGPLVCRGTLQGLV    |
| Q62N17 | PEPAEEESQVLRGTGHCKWFNVRMGFGFISMINREGSPLDI   |
| Q56JV9 | VAFRKFKLITEDVQGNCLTNFHGMDLTRDKMCSMVKKWQT    |
| A5PKE4 | LKKKIPREVLKSTKIGHTVNKMRQHS DSEVACLAREVYTE   |
| P12235 | IIDCVVRI PKEQGFLSFWRG LANVIRYFPTQALNFAFKDK  |
| P59034 | IGPAAFSGLAGGLRLLDLSHNRIRRI PKDALGKLSAKIRLS  |
| P33681 | HLRVNQTFNWN TTKQEHFPDNL LPSWAITLISVNGIFVICC |
| Q86XR7 | MRPLNNPLPRERTPFALQTINALEEESRGFP TQVERIFQES  |
| P0AC11 | HIAAFFDARIAALTGAGIKRNRLVLD PGMGFFLGAAPETSL  |
| O75828 | ETLTEGDLVDLMKKFVEDTKNEVHEREGWPN SPYGVSKLGV  |
| P0DMC8 | LEQIEWNVVGEFEDSTALINNL PKLDAHVLI TDL SMPGDK |
| P09056 | IRHPCHGNLMNQIKNQLAQLNGS ANALFISYYTAQGEPPFN  |
| Q96L15 | GLTLPPGFKAQNGIAIMVYTNSSNTLYWELNQAVRTGGGSR   |

|        |                                            |
|--------|--------------------------------------------|
| Q9D3G5 | RQNVRFLLTSMRRLSSIKRDTNSIAKAIKTRGEGIHQKLRSM |
| Q9CZ96 | VAFILFLDKDSALNCTRAINNKQLFGRVIKASIAIDNGRAA  |
| Q5SQ64 | GRPAPDPGKPGRESRLRLGNYSLWLEGSKEEDAGRYWCAV   |
| Q0VD35 | MGELRGLRRNYRCTTCSVSLNSIEQYHAHLKGSKHQTNLKN  |
| Q8TDC0 | LGKKLSVPQDLMMEELSLRNNRGSLLFQKRQRRVQKFTFEL  |
| Q9WUL5 | VTSVLRLLKQPSPRNFSCMFWNAHMKELTSALIDPLSRMEPK |
| P12235 | GDCIIKIFKSDGLRGLYQGFNVSVQGIIIRAAAYFGVYDTA  |
| Q14002 | EVTRQFYVFSEPPKPSITSNFNPVENKDIVVLTQCPETQN   |
| Q3T0X7 | LKGKKMRKKEAEHVLQKFVQNKWLEKEGEFTLHGRATLEM   |
| Q17QI5 | WCGGNFLEVTEQILAKIPSENNKLTYSHGNYLFHYICQDRI  |
| Q9G2N7 | TDQVKGVLTQGDALSQADVNLKMPRNNQLLHFAFREDKQW   |
| P51149 | GDSGVGKTSLMNQYVNKFSNQYKATIGADFLTKEVMVDDR   |
| Q3SWY4 | RVEADMGRAEVHWCAPSSPVNQYWLLWEGGAPQKGPSPFN   |
| Q15005 | KWKIDDKPVKIDKWDGSAVKNSLDDSAKKVLEKYKYVENF   |
| Q8R092 | LADDDTRLLQLETQGNQSCYNYLYRMKALDAIRASEIPFHA  |
| P47985 | SRESLSGQAVRRPLVASVGLNVPASVCYSHTDIKVPDFSEY  |
| Q6PDY0 | QGHIGEIRELKQLNRRLQAENRELRDLCCFLDSEQRGRRA   |
| Q9H853 | RLISQIVSSITASLRFDGALNVDLTFEQTNLVSYLSTSTPW  |
| P04179 | EALAKGDVTAQIALQPALKFNGGGHINHSIFWTNLSPNGGG  |
| P15119 | AAHCNGSEISVILGAHNINKNEPTQQIIKTEKTFVHPKFQY  |
| Q3SZG6 | AYGTIVKMRDDLKATLTARNREAKQLTQLETRQRNPSDR    |
| Q86UA6 | LVGSPPWKEAFRQRCLERMNRSDRLLNRYRQAGSSGPGNS   |
| Q99614 | ECFHDCSASFEEEPGADKVENKSNEDVNSSELDEEYLIELE  |
| O43760 | AVCLVFALIVFSCIYGEGYSNAHESKQMYCVFNREDACRY   |
| O54709 | DTSQEQQQRALALTTSPGENGIIRGRYPKIEKLIKISPMFVV |
| Q9TQE0 | SDVGEYRAVTELGRPVAESWNSQKDFLERRRAEVDTVCRHN  |
| Q15560 | MARTGGTQTDLFTCGKCRKKNCTYTQVQTRSSDEPMTTFVV  |
| Q3UME2 | VRRSLLGLTFCYCYLASHLTKYVLSVLKFTYPTLFQGWQT   |
| O75841 | AFRTENNADYPWPRQCCVMNNLKEPLNLEACKLGVPGFYH   |
| O95377 | CHADPCPNIVDCFISKPSEKNIFTLMVATAAICILLNLVE   |
| Q9CWQ0 | ILRATKLGIPYQVIHNASIMNAVGCCGLQLYRFGETVSIVF  |
| Q9Z1L4 | ERLNWIYYKDQGTGNNRVFYGNSDRSSTVQNLRRPPIISRFI |
| Q9CQE8 | AEKYKDLVDPNRKNTDNAAKNAEPLINLDVNNPDFKAGVMA  |
| Q9CR59 | SYRAPPPRRRPGPHSPDPENLLTPRWQLTPRYVAKQFGRH   |
| P49720 | GLAGLATDVQTVARLKFRLNLYELKEGRQIKPYTLMSMVA   |
| B9EJG8 | LVVAVLRFIQLKPKVLNPNWLNISGLVALCLASFGMTLLGNF |
| Q60651 | YDNKKKDWAWIDNRPSKLALNTTKYNIRDGGCMFLSKTRLD  |
| P53810 | PTFVRMLAPEGALNIHEKAWNAYPYCRTVITNEYMKEDFLI  |
| P55859 | IGGLVNKLTQAQTFDYSEIPNFPPESTVPGHAGRLVFGILNG |
| Q8BXP5 | CYHGFSGIVALLSCCPFLDVNQDQDKDGTALMLAAQAGHMS  |
| P05208 | VCAGGDGVTSSCNGDSGGPLNCRASNGQWQVHGIVSFGSSL  |

|        |                                             |
|--------|---------------------------------------------|
| Q8N6Q1 | IEEELEALFLEREVSKLVSMNPVEKEHTSQNNEGTPQKTA    |
| P30711 | ELYLDLLSQPCRAVYIFAKKNDFELRIVDLIKGQHLSDA     |
| Q6ZS82 | DVADLRELEREVLVQVEMIDNMEMKVVNFRWTVQARQAAGA   |
| Q9H190 | KMPALPVQATAISPPPVLYPNLAELENMGLSLSSQEVQES    |
| P08831 | EEEEIKPRSAHYFSQSNVKYNFMRVIHQECILNDALNQSII   |
| P70190 | EYLRVVMCALKLYVNDHYPNGNCNVLRKTVKSKEFLIACI    |
| Q9BYG3 | PTPVCTPTFLERRKSQVAELNDDDKDEIVFKQPISCVKEE    |
| Q96SN7 | VHLFALLISTCILPNVEAVSNIHNLNSISESPHERMHPYIE   |
| P47865 | VATAILSGITSSLPDNLGLNALAPGVNSGQGLGIEIIGTL    |
| P09093 | GDILPNKTPCYITGWGRLYTNGPLPDKLQARLPVVDYKHC    |
| Q96PB8 | IDEHAFKGVATLQTLDLSDNRIQSVHKNAFNNLKARARIA    |
| A5D9C6 | EGPLSDKCSRKTLFYLIATLNESFRPDYDFSTARSHSFSRE   |
| A6QR46 | IPSYIRDSTVAVVVYDITNLNSFQQTSKWIDDVTERGSDV    |
| P21796 | ETKYRWTEYGLTFTEKWNTDNTLGTEITVEDQLARGLKLT    |
| Q2KI95 | ICHRCQQPIGTKSFI PKDSENFVCYERQYALQCVQCKKP    |
| P59542 | DERVWTKKEYEGNVTKIKLRNAIHLSSLTVTTLANLIPTL    |
| O75629 | PGAGSGVPYFYLSPLQLSVSNLQENPYATLMTLAQTNFCK    |
| P41227 | RLGLAQKLMQASRAMIENFNKAVSLHVRKSNRAALHLYS     |
| Q96JC9 | PMTVFKGNRPYQKDCVLIINHDTGEYVLEKLSSSIQVKKT    |
| Q7Z692 | STWMATTEKPELGAHDAGDNNIYEVMPSPVLLVSPISDTR    |
| Q1LZB9 | AECCASGNIDTAWSNFTHFGNKISLLGLGLVHCLPCKDSC    |
| P78380 | ASQSENELKEMIE TLARKLNEKSKEQMELHHQNLNLQETL   |
| Q6PH85 | MAVAYWKLVLVSGRFKFLDLWNFTLMEHHRKSI PRDTWNLLL |
| Q8IZ81 | NLTEMAYSLKSEALKFHLYNLVPGIPTMEHFHQFYCYLVY    |
| A2AFE9 | PMALMIGGPRVGSRVLERSGNNKPYIPVPRSQGFPPRGS     |
| Q8R092 | GRHPCSLMGKNFRSYLLDLRNTSTPFKGVGKALIDTLDDGY   |
| Q9BVC5 | SVSPLILSSNLPVNNKTEHNNNDAKQNHDLTHRKS PSGFVK  |
| O95639 | QNSSPNQRTQPQVIGVMQSNSSAGNRGPRPLEQVTCYKCG    |
| P40240 | ATGLWLRFDSTKSI FEQENNHSSFYTGVIILIGAGALMML   |
| P15945 | ICDGVLHGITSWGPSPCGKPNVPGIYTKLIKFNWIKDTIA    |
| Q5JUR7 | LASHLASHGFFCLRFTCKGLNIVHRIKAYKSVLNYLKTSGE   |
| Q2TBT5 | YPVVAASICAKVARDQAVKNWKFVEKLQDLDDYDYGSGYPN   |
| O89051 | VILNEPSADAPAARYQTIEENIKIFEEDAVEFISVPVPEFA   |
| Q9EQ06 | IYSAAKVKKEEVDVSI LVNNAAGVVYATDLFATQDPQIEKT  |
| P54369 | GNSQRDHSLSASILYSDERLNVTEEPTSNDKTRVLSIQSTL   |
| P17667 | LRNAIRYIESLQELLEQVENYSLPGQSCSEPTSSCS        |
| Q9NUI1 | AVDAMTRHLAVEWGPQNI RVNSLAPGPTISGTEGLRRLGGPQ |
| Q9Y2B2 | TVLGLARLRHWVYLLCFSAGNYNQGETRKKELLQSCDVLG    |
| Q9CQE0 | FKISQDSVRSSNRSETSASDNTETYQEDTSSSGHPTFKCPL   |
| Q9D9J8 | KEWFSANITLEFDIEFKLPFNSNIKTHACMGLTAESWLEK    |
| O35943 | LHYLQILNIKKQSVCVVHLRNLGTLDPSSLDETAYERLAE    |

|        |                                            |
|--------|--------------------------------------------|
| Q5VVH5 | KTPPTRVVELVPWADRSRENNLASGRETLPLGRHPLSSTQ   |
| Q64329 | YSTKCYFIMNKTTWSGCKANCQHYSVPILKIEDEDELKFL   |
| Q8CJC5 | GEPVPESEVISGEECVICFHNTANTRLMPCGSHFCGSCAW   |
| P70280 | IVYLCITDDDFERSRAFSFLNEVKRFQTTYGSRAQTALPY   |
| Q8BXV2 | EVLGLDVSNLSQYFSPASVSNPSTRALVLVGVLLAYWFLS   |
| Q14197 | KINRLGELILTSESSRYQFRNLADCLQKIRDMITEASQTPK  |
| P02647 | KDSGRDYVSQFEGSALGKQLNLKLLDNWDSVTSTFSKLREQ  |
| P52803 | VRPTNSCMKTIQVHDRVFDVNDKVENSLPADDTVHESAEP   |
| Q8VCH9 | CPKGCCLCSSGGLNVTCSNANLKEIPRDLPPETVLLYLDSN  |
| Q9D4C5 | PMTVFKGNKRPYQKDCVLIINHDTGEYVLEKLSSSIQVKKT  |
| Q9HBJ8 | TDPSKNHTLPAVEVQSAIRMNKNRINNAFFLNDQTFLEFLKI |
| P10747 | VCVVYGNYSQQLVYYSKTFNCDGKLGNESVTFYLQNLVYN   |
| Q7L4S7 | NTSPTPDPTVREALCAPDNLNASIESQGIKMYINEVCRET   |
| Q2YDI9 | RLQNQRGGLICLQDIKKPDQNDWKSGLNAMECALLLEKNVN  |
| O08547 | IQKTKKLYIDSRARRNLGSINTELQDVQIRIMVANIEEVLQR |
| P67936 | RELDGERERREKAEGDVAALNRRIQLVEEELDRAQERLATA  |
| O35536 | YDRDQQKRRFNYGGCLGNANNFHSRDLCQQTCGSIEKVPP   |
| Q9H2J4 | VVKTYEDMTLEELEDHEDEFNEEDERAIEMYRRRRLAEWKA  |
| Q53TN4 | RLPWTWKCSKLLMKS IHAGLNAVAAILAIISVVAVFENHNV |
| Q91ZW8 | AGLLLIILILVSKVPSSEVQNKIYQELMQLKAEVHDGLCQP  |
| Q8R023 | YDEQLSLCLERLSSGKDKNKVNLQNKYVRCVRAEVRHLRR   |
| Q9UKY7 | MEKSFEVVRHKNRGRDEVSKNQALKQLQLDNQYAVLENQKSS |
| Q8N966 | AARLFSPALLHGALFLFLSANALGNYVLVIQNSPDDLGCQ   |
| P0DMB1 | SQTEPQNDNEGETSLATTQMNPPKRRQVEQGPSTGAKKPSI  |
| Q8TED1 | LKELHKEFGPSHFSVLAFPCNQFGESEPRPSKEVESFARKN  |
| Q9JHH9 | ETVDGGVILESDPQQVIQKVNFRDSDSLTEQSVAVLQSA    |
| Q3T116 | YPESRGADTAWRVPGDAKQGNDDIPVDRLTISYCRSSGFGG  |
| Q9NP99 | TVTQAPPKSTADVSTPDSEINLTNVTDIIRVPVFNIVILLA  |
| Q8TAG6 | SKVSSPARRRAKSSQHLLTKNVVIESDLYTHQPLELLPHRG  |
| Q6NZB0 | LTSKNQIERLTRPGSSYFNLNPFVQLQIDPEVTDEEIKKRF  |
| Q92567 | VQPNSIPSAIYPAPVAAPRTNGVAMGMVAGTTMAMSAGTLL  |
| A3KN24 | QAETLLEPFMVHELVLWIQENLRHILKCFEAGGSEKCSSA   |
| Q96AQ2 | CLLALLVLVKQLMSSAVQDMNCIRQAHHVALLRSGGADAL   |
| P11900 | SVITPSFTSNTAMDIAVKVKNSGDNTELGTLVPLSFGAAV   |
| P63158 | REMKTYIPPKGETKKKFKDPNAPKRPPSAFFLFCSEYRPKI  |
| Q9CRA0 | KALPESMTPVHAVAIVVFTLNLNVSSDLAKAMARAAGSPGQ  |
| Q1LZB9 | ATCSLVLKTVDVSAECCASGNIDTAWSNFTHPGNKISLGF   |
| P32972 | NSKIKKQTLVTVCESGVQSKNIYQNLQFLHLYLQVNSTIS   |
| P10629 | YSPQENVVFSRRGPDYDGSNSFYQEKDMLSNCRQNTLGHN   |
| P81126 | EMYTRAANMFKMAKNWSAAGNAFCQAAKLHMQLQSKHDSAT  |
| Q9BZM5 | LHYDCGNKTVTPVSPGLGKLNVTTAWKAQNPVLEVVVDILT  |

|        |                                             |
|--------|---------------------------------------------|
| Q80W35 | SVLLACTSPLNLVQFLVNNNGLELKAGLWTLCYHELCSH     |
| Q9UNN8 | LGCELPPEGSRAHVFFEVAVNGSSFVSFRPERALWQADTQV   |
| P28667 | GDVTAEEAAGASPAKANGQENGVRSNGDLTPKGEGESFPV    |
| P25401 | PYIFAIGSLLDGNGKKIATDNGTTQKLLMFMFGDEVQVKG    |
| Q32KP7 | SLFSELEAKQLRKLKYTKNNQTTKFLMAFCPLDAPESLL     |
| Q9BQI4 | FEEDHVKKLQKQVATLEKRNRLRERVKKVRSRQARKK       |
| Q8VC04 | GKAVSQLTSRKDEDKPILPDNPAMASQAANYFSTGSSKPAH   |
| Q6P4H8 | HGSAKFYISDLWKVTFQSQYSNVVIFGVPQMLLQLEKKLRE   |
| Q9EPQ7 | NATHVEHPLCPKPGFVRGFNHPCGCFEPLPGDPNKTNLV     |
| Q8WW62 | FYQLCLSNQHNHFGSVQVYLNFGVFYEGPETDHKQKERKQL   |
| Q9N0V4 | GLDFPNLPYLDGTHKLTQSNAILRYIARKHNLCGETEEM     |
| Q96KN8 | TGPKDQPPALRRSAVPHSGLNSISPLEEESVGFALVQLP     |
| Q8CCI5 | SANATTKTSETNHTSRPRLKNVDRSTAQLAVTVGNVTVII    |
| Q9NRD1 | SADYFVLASFEPPTVIQQWNNATWTEVSYTFSDYPRGVRY    |
| P04230 | SDVGEFHAVTELRPDAENWNSQPEFLEQKRAEVDTVCRHN    |
| E1ANH6 | AIPGDPDRDTTTPLAMAQTLKNLTLGKALAEQRAQLVTWLK   |
| P23888 | VFKNLNIIFFKGYNIALIGQNGAGKSTLLRIIGGIDRDPDSG  |
| Q2HXU8 | MLLIGLVTLGMMFLQISNDINSSEKLSQLQKTIQQQDNL     |
| P22027 | KKLPWSRDSRYFWGWLNAVFNKVDHDIRDVGPDRAASEWL    |
| Q2T9W7 | KRIKEHLTESLFFEQSFQFENRTVSSGSLTTFVFLAVCIT    |
| Q9NPA0 | PMVMMVLPLLIFVLLPKVVNTSDPDMRREMEQSMNMLNSN    |
| Q9JJW5 | GGSQQGPSTPPNTPDPRSFPNPNENIAPGYSGPLKEIPPERF  |
| Q61334 | TQLAKEIANKGVLKIQAENTNKAAKKMEENEKLLGLRND     |
| P09016 | KQPAVVYPWMKKVHVNSVNPNTGGEPKRSRTAYTRQQVLE    |
| A5PJS2 | GSALWLI GMLINIHS DHVLRNLRKPGETGYKIPRGGLEFYI |
| Q78HU3 | VVDMQIVMDKGPLPSGFSAVNDPQDIKASVSKKKRMCVKLM   |
| P48739 | CAYKLVTIKFKWGLQSKVENFIQKQEKRIFTNFHRQLFCW    |
| Q2YFS1 | KDPQMSIAWRWKDFGHHFYNSMPPFIHEHFKGRLILNWTQ    |
| Q30134 | RWFRNGQEERTGVVSTGLIHNGDWTFTLVMLETVPRSREV    |
| P04228 | TNEAPQATVFPKSPVLLGQPNTLICFVDNIFPPVINITWLR   |
| P17931 | FNPRFNENRRVIVCNTKLDNNWGREERQSVFPFESGKPFK    |
| Q8K5B8 | LNENKKSASAGDPGSLVSLNPGGGLSASGAPWYPIHSRSR    |
| Q8N755 | VLVSSWFILALQKWIIDLAMNLCTFISAASKFAQLQCLWKT   |
| Q5U680 | AGGFRGIYAGVPSAAVGSFPNAAFFLTYEYVKSLLHTDST    |
| Q2YDG2 | NWDSHIAIWNSTPNYQVIADNPEGLLFKYKRDRIKILNVDPK  |
| P10036 | EALAAVHGSEFSQTTICRFENLQLSFKNACKLKAILSKWLE   |
| Q1LZ96 | VEQAVLLSRLEEEYQIQKWNIEWAHDYELQELRARTAAGT    |
| Q3ZBS0 | RIKAQLPLKDKARMARHVLNDSGEVSVTKRQVLLHAELEH    |
| P23946 | LEIVTSNGFSKFCGGFLIRRFVLTAAHCAGRSITVTLGAH    |
| Q96BS2 | HRRFKQLSGDQPTIRKENFNVPDLELNPIRSKIVRAFFDN    |
| Q8K3A2 | APGGRRKEGRRTHRPREQDRNVQLSKALSALRHGALKLGL    |

|        |                                             |
|--------|---------------------------------------------|
| A2ANU3 | VQQLDPNTLQQSVESHYRPNIIILYSDGVLRSWGDGVATDC   |
| Q9DBJ1 | LFVVRTWRLNERHYGGLTGLNKAETAAKHGEAQVKIWRRSY   |
| Q9CQ61 | AVGYIYVTFGLYSALPFLKNTVILLYPFAPLMVLYGLSLA    |
| Q8C4N4 | SILCFAASTFPQYIKACKTGNMDQALSFLWFLGWIGGDSCN   |
| P60879 | EAEKNLTDLGKFCGLVCPCPNKLSSDAYKKAWGNNQDGVV    |
| A5D9C6 | LDSDPFGEDGSLWSFNFFYNKRLKRIVFFSCRSISGSTYT    |
| Q8N129 | KRKRHPYYSVSETRLEEALNLCERILDYSVHAERKGSRLY    |
| Q9NPC3 | MERNRQYQKLQGLYDSLRLRNITIANHEGTELEPSMIAQSGV  |
| Q9Z2C6 | CGVNGPSDWQKYTSAFRVENNDADYPWPRQCCVMDKLEPL    |
| A2VDZ9 | RGPFDDVVTTNLKLGNDTDRNVCFKVKTTAPRRYCVRPNSG   |
| O35075 | PRLFTCPLETNTFKVEFEVNVVLLHADHLITENFPLKLC     |
| P59041 | RERRLRARREALRKKQENQANKGTSWDDTRDATFFVVLFLI   |
| Q6PIL6 | IKGLSILLRGTVQEKLNWAFNLYDINKDGYITKEEMLDIMK   |
| P18669 | EAIMELNLPTGIPIVYELDKNLKPICKPMQFLGDEETVRKAM  |
| Q1WG82 | SLRKSRRPALEPGALRCLTPNIRSLWPTCQDSVSTALPFLO   |
| Q9D8U2 | SLFFFLFLRLFPMPNWFNLNLSAPILNIPIVQFFSVLIG     |
| Q92979 | GEQAQDWDALPPKRPRLGAGNKIGGRRLIVVLEGASLETVK   |
| Q91VE3 | GIPDSKTNCTNGDSGGPLVCNDTLQGLVSWGTYPCGQPNDP   |
| B2RXH8 | LLENLEKIEKEQSKQEVEVKNAKSEEEQSSSSMKKDETHVK   |
| Q9D777 | RAVLTQKHKKHSHVHLVFNITSKADSDVTEVMWQPVLRR     |
| Q13242 | EKDLEDLFYKYGRIREIELKNRHGLVPPFAFVRFEDPRDAED  |
| O35658 | EEPSQGQKAEQEPEPERTSTPNFVVEVTKTDGKKTLLVLDCHY |
| Q99LS1 | WPDETMGPFPGQDQRFQLPGNIGFDCHLNGTASQKKSQAHK   |
| Q9BTT0 | EVTTELVDNCLCVNGEIEGLNDTFKELEFLSMANVELSSLA   |
| Q9D3B1 | SGARKKKGPGPVATAYLVLYNVVMTAGLVIAVGLVRLAYLA   |
| Q9CRC9 | EAGGIDLFGVGGIGPDGHIAFNPEGSSLSRTRLKTLMAMDTI  |
| P01139 | TTATDIKGKEVTVLAEVNINNSVFRQYFETKCRASNPVES    |
| P97299 | MSAFGFPWPDMLECDRFPQDNLCIPLASSDHLLPATEEAP    |
| P0DMD0 | ETVDDLAIACDSQRPSVVFINECDFIHDASNSQHIKHI INQ  |
| Q14493 | RSRCSDWASAVEEDEMTRVNKEMARYKRKLLINDFGRERK    |
| Q13637 | AKDNINIEEAARFLVEKILVNHQSFNEENDVKIKLDQET     |
| Q9JKF4 | FGSSCYLISTKENFWSTSEQNCVQMGALVIVINTEAEQNFII  |
| P41247 | SAGSLVASVLLTAPEKIEECNQFTYKFAEEIRRQSFQAVTP   |
| Q96M98 | VAEIIVNSGDGIDYSQQKRENIGDLIQETLEAFERYGGENA   |
| Q99581 | KGSGQIQLWQFLLELLADRANAGCIAWEGGHGEFKLTDPE    |
| P30408 | HSLVGLALLCIAANILLYFPNGETKYASENHLSRFVWFFSG   |
| P40237 | LFFILGAVILGFGVWILADKNSFISVLQTSSSSLQVGAYVF   |
| Q8WY41 | SGAAAARLLKPELQVCVFCRNNKEAMALYTTTHILKGPDRV   |
| Q077R2 | KNIEIIICDDSSDDTDWDIINKIKDSRIICIKNNYCKGAAG   |
| P09326 | KRPFKELQNSVLETTLMPHNYSRCYTCQVSNVSVSSKNGTV   |
| Q9D3G5 | FETDNILESRYVIQDIQDENQLLLIDVRRLRQNVRFLLTS    |



|        |                                            |
|--------|--------------------------------------------|
| P02970 | WEWKVGTGLNGFGNVLNDLTNGGTRKLTITVTGNKPILLGRT |
| Q3ZBN4 | KIHRFMAPKEAPKKLIRYIDNQIVSTKGERFKDVRNPEAEE  |
| Q0VCU8 | RLKKLQEESDLELAKETFGVNNTVYIGIDAMNPSSRDDTFEF |
| P32971 | LVFTVATIMVLVVQRTDSIPNSPDVPLKGGNCSEDLLCIL   |
| Q0VD35 | SPYQRSDRYCGLCAAWFNNPLMAQQHYDGGKHKKNAAARV   |
| Q6P3A1 | PRKGWEEGSKADVRVTSSKENCSPQTEAAWPKHTIDNAKSL  |
| Q8C5T4 | IYEGQWQNDKPEGEGMLRLKNGNRYEGIWERMKNHGHRFF   |
| Q14135 | DLDCDNDHVSKMSRIFNPHLNKTANGDCRRDPRERSRSFIE  |
| O89116 | IAYSDEVNRELLGDAGNSSENQRAHLLDNTERLERSRRLE   |
| Q9Y2W7 | ILLRGTVHEKWKWAFNLYDINKDGYITKEEMLAIMKSIYDM  |
| Q9CWD3 | ISQESQEQLQARIQVNPNEVNAFMWLGPDVAAAVVATEDGT  |
| P31947 | NVVGQRAAWRVLSSIEQKSNEEGSEEKGPVREYREKVET    |
| Q80VP8 | ADRDQEEAIAQFPYVEFTGRNSITCHTCQGAGYIPAEQVNE  |
| P50135 | SMRSLFSDHGKYVESFRRLFNHSTEHQCMQEFMDKKLPGII  |
| Q9BR01 | TSPRLIKSHLPYRFLPSDLHNGDSKVIYMARNPKDLVVSYY  |
| P20231 | QFYTAQIGADIALLELEFPVNVSSHVHTVTLPPASETFFPG  |
| Q8TD47 | TVQIDLGTGKITSFIKFDGTGNVCMVIAGANLGRVGVITNRE |
| P0CI00 | DTSTSMTMENSLILEDPFEYNDSGEDCHSSSTITQCLLTHS  |
| Q96PB8 | RIQSVHKNAFNNLKARARIANNPWHCDCTLQQVLRSMASNH  |
| P02722 | LSFWRGNLANVIRYFPTQALNFAFKDKYKQIFLGGVDRHKQ  |
| Q6IC83 | LENIGPTEDVQASAHGGVEENMTSDIEIPEAKHHRPTEDV   |
| P47753 | GQQTIIACIESHQFPKNFWNGRWRSEWKFITPPSAQVVG    |
| Q9EP52 | ELHEPIPSLFRALTEGDTQLNWNIVSFPVAEELSHHENLVS  |
| Q8R3S2 | EDNPSRERCSVPYSCCLPTPNQAVINTMCGQGMQALDYLEA  |
| Q3KP22 | KEKPNKDCRRLWPLISLMSRNKILSGDTACQGELSHPCSTT  |
| Q61599 | EFLTVPVEEAPKGMARGTYHNKSFFTDDDKQDHLTWEWNLA  |
| Q9UIY3 | IGTFDPGELCVCAAIQWLQDNSASYFLNRKLVYEPSTQAKP  |
| Q8CD60 | LTTRRLGPTLAPEQTRRVTRNSSTQTVSDKSTQTVLPYTAT  |
| Q99KR3 | RNPQREEIIGNGEQQFIYIENGDVVKTEGATLRVLYTPGHT  |
| Q8BW11 | KDPDSLQTVNVTVISKAECRNAYKAFDITENMICVGI VGR  |
| P51148 | NWVKELQRQASPNIVIALAGNKADLASKRAVEFQEAQAYAD  |
| A8MWP4 | SLHLQDSRNASSLPHKGWRCNFPLQGPAGLTHKSACVGRMG  |
| Q9H0W7 | HRFPLDPKRRKEWVRLVRRKNFVPGKHTFLCSKHFEASCDF  |
| Q8NGN8 | DIIYSSSISPRLISDLFFGNNSISFQSFMAQLFIEHLFGGS  |
| Q0VCP2 | LLLLFHSLKRHPPLFLDVTVKNFCDILNPLDQLGIYKSNPGI |
| Q5VWZ2 | FLHGSGDSGQLRMWIKVQLNQDLTFQHIKIITYTAPPRSY   |
| Q9D711 | EQSEGVGARVRRSIGRPELKNLDPFLFDEFKGGKPGGFDP   |
| A6NDR6 | AFAKQVRSERPFFSSNPELDNLMIQAIQVLRFHLELEKGG   |
| Q64695 | SFRPKTAVWVSGSQEPSKAANFTLQNLNAYNRTRYELQEFLL |
| Q8CI43 | QAPAKSQEPPVDLSKVVIENKQDLEEFREAFELFDRVGDG   |
| Q9HC24 | PALILLFALGSLGLIFALILNRHKYPLNLYLLFGFTLLEAL  |

|        |                                              |
|--------|----------------------------------------------|
| Q0VD59 | RLKAYNRVIYVQNCPEPESKRNI FEK PALPEPNFESKDGRGV |
| Q9D968 | ALVSQFYLLPKGKQSMSKVG NADVPDYSLLKKQDLVPGTVY   |
| P12319 | LNPPWNRI FKGENVT LTCNGNFFEV SSTKWFHNGSLSEET  |
| Q8IUA0 | WTVRTEGGHFLHSPTFSWRNVAFLLLSLAEWTSAMLTK       |
| Q3ZCD8 | ENAVRQNGQLVKTDSMYGISNIDAMIEGTSEDMTVVDAASL    |
| Q9CXV9 | NKDQWYNVLEFSRTVHADLSNYDEDEGAWFVLLDEFVWQKI    |
| Q15040 | EWIGGESELRKFLKHHLRGKNCELLLVPEEVAHQSWRTD      |
| P15927 | PCTISQLSATLVDEVFRIGNVEISQVTIVGII RHAEKAPT    |
| O09044 | RTKNFESGKNYKATWGDGDN SPSNVVSKQPSRITNGQPQQ    |
| Q9BUA6 | RLERNGMISAHCNLC LTGSSNSPASASQAFTIMDQNRDGF I  |
| P41273 | DDPAGLLDLRQGMFAQLVAQNVLLIDGPLSWYSDPGLAGVS    |
| Q8CCX5 | KKEEKPTKSKVGFLLPSAIINEISFSTKVSQKYENENMETV    |
| P54130 | TYSSNLYKHVD TGRRYVALNKDGT PREGTRTKRHQKFTHF   |
| P23409 | RRRLKKINEAFEALKRRTVANPNQRLPKVEILRS AISYIER   |
| Q9Z2U1 | LKEAIKSSLI IILKQVMEEKLNATNIELATVQPGQNFHMFTK  |
| Q9CY24 | ISATAIFLILVSACILRFGTNSFCNSIISLNLTISCSEAQK    |
| P68265 | AALYAAPYKSDFLKALSKGQNVTEEECLEKVRLFLVNYTAT    |
| Q27956 | PITPVNATCATRHP CPSNL MNQIRNQLGQLNSSANSFLI LY |
| P01193 | DLSLETPVFPNGDEQPLTENPRKYVMGHFRWDRFGPRNSS     |
| P01033 | IRFVYTPAMESVCGYFHRSHNRSEEF LIAGLQDGLLHITT    |
| O35257 | ITELSYMEQAPDEIISRARNIEEKIIVLIEALRGILSKIQ     |
| P21583 | KPFMLPPVAASSLRNDSSSSNRKAKNPPGSSSLHWAAMALP    |
| Q147U7 | LPDLVRGLPTLASVLRKVKNKRVVWESI LEECGLQEGD      |
| Q9P0V8 | AQLHSNLSLELGPLESGDSGNFVLMVDTRGQPWTQTLQLK     |
| Q99390 | KCIVSQLAFADGDVLVTGEMNESERASFLSTLNKMAEKKN     |
| P31098 | DPEQTDDDDDDNSQDVNSNDSDDAETDDDPHSDESHHS       |
| Q3ZBR5 | PEDDMNPSELDEEYLMELKNMPDEEKRRREESSRLKEEG      |
| Q8BX35 | RCQTCITCAVINRVQKANCNTSNAICGDCLPRFYRKTRIG     |
| Q864V4 | SAADTVLVVAFSNASRVFQNPQTLAEIPASPRLLTDGHYM     |
| P97382 | EAYSMARQFNLI PPVCEQAENHFFQREKVEMQLPELYHKIG   |
| A0PJW6 | AVAAVSRPPVPVQPLDAEVPNRGPFDLRSALWRYGLAVGCG    |
| Q9CQX5 | CMSFTLNEQFMEKYVDPGNHNSGIDLLR TYLWRCQFLLPFV   |
| A6NGA9 | VQFLVIKNGLELYAGLWTL CNHELCSHTPKPPYYLQYSRA    |
| P52955 | APGEERRRSPLDHLP PPANSNKPLTPFSIEDILNKPSVRRS   |
| P83626 | CSRTADRVQCCKQGT YCDSENCLERCHTCS SCPDGRVVRC   |
| Q3T113 | LLSGNDFQTAEEGSDVKLV CNVKSNPQAQMMWYKNGILNL    |
| Q9D413 | VPLPRTSGLPKSVAGYQEARNGAMDGALKAGRRLSASSIAP    |
| P62080 | EYWQCCGAFGADDWNLNIYFNCTDSNASRERCGVFPSCCTK    |
| Q6ZRC1 | ELHRHGLGNLLSELAQNMLNDVALAEYTATFLAPGVPETS     |
| P20490 | GIAMLILNLTNNFAYMNNCKNVTEDDGC FVASFTTELVLMM   |
| Q6P3D7 | SENRNYMAIINPYPHVRGNANYGMSPTENPLYDWRGVTNG     |

|        |                                            |
|--------|--------------------------------------------|
| Q9CY57 | LRGGRATRTRLLRGGMSLRGQNLLRGGRAVAPRMGLRRGGVR |
| A0JN86 | DKDYHRSDFQIAICLDCLRNNQSGDNVVKGLMKKFI RCST  |
| Q91XQ6 | TLKGYLISCVWSCYRYINGRNSSDVLVYVTSNDTTVLLFPY  |
| P70195 | DGIVLGADTRATEGMVVADKNCSKIHFISPNIYCCGAGTAA  |
| Q3T0S6 | ETKKTRVKLPSPGSKKVISSANRAVGVVAGGGRIDKPI LKA |
| Q9CQE1 | EGVYELATFQMKPGPALWGNAFKRAVNAHVSTLVGV       |
| 043186 | LFAKTQYPDVYAREEVALKINLPESRVQVWFKNRAKCRQQ   |
| P01910 | TWLRNSKSVTDGVYETSFVFNRDYSFHKLSTLFTIPSDDDI  |
| Q91WR8 | CGLTATYPELNTLQEELKPFNVTVLGFPCNQFGKQEPGKNS  |
| B2RPK0 | GEHPGLSIGDVAKKLGEMWNNTAADKQPEKKAAKLKEKY    |
| Q04744 | SRSEDP IRPAALSYANSSPINFFLNGFHSAAAAAAGRGVY  |
| Q8WTZ3 | DYKHEPLSPVECGKVFNKLNSHTGEKLYKPKRHDSALENTL  |
| P0C2W7 | L YLVHSLRRLYHNDHIQIANRHLSRLMVGPHAAVPLWDN   |
| Q02878 | TKEKKPEAKKVDAGGKVKGNLAKKPKKPKGPHCSRNPVLV   |
| Q9NVA1 | WEDVQQRGRVMGVNPHYILKKNMILMTNFYAAILGYDEGIL  |
| O02769 | SMAPRIPEWLFVASYMGYFNSCLNAIIYGLLNQNFQRYR    |
| Q8BYH0 | GRTVGPTGPFPPSCLPGTLLNTATYAQALSHVASLKGGLPC  |
| P30042 | VPQMHVIDHTKGQPSSEGESRNVLTESARIARGKITDLANLS |
| P46738 | LGATRUVYNPASSGETLTVINDQDY PMLVQSEVLSEDKSP  |
| Q8C3X2 | SIRKDMVILEKSEFANLRAENEKMKIELDQVKQQLTNETSR  |
| Q8WXJ9 | DPCELLHLCLRTIRNQLLTNNMLPDGIFSLLI PARLQNYLN |
| Q3LI81 | SSQCQCQSQNPESSSCRPLVNVAPEPQLLESSPGVEPTCCV  |
| Q32KV0 | LPVVRTWRLNERHYGGLTGLNKAETAAKHGEEQVKIWRRSF  |
| P97765 | IEFGQRMLQVASQASRGEVNGAYGYPYMPGAYVFPFPVA    |
| Q61999 | YKLYCLRPSLRSLERLRRTNRILASSCCSSNILGSVNVCG   |
| D3Z3K2 | VFGFPPGNNSKFSLDHIPVGNQGGDEVDQFRPFVCSPTA    |
| Q5XG99 | TFQGPVVCCTPTSHVYMFKNKSGDSDGSEESHRVVLRP     |
| O60671 | INTQEPEETLDFDFCSTNVINKIILQSEGLREAFSELDMTS  |
| Q0II10 | CEGTSQPEPSCSAVRITANKNYRSKTSQEGALKKMHEEEHH  |
| Q3V1I0 | YGDIMTMEFTGAPCDINNLNCGIHGSEMFAEMDLKAIKPY   |
| P18440 | LQTPDGVHCLVGFTLTHRRFNKYDNTDLIEFKTLSEEEIEK  |
| Q9H9Z2 | AARAADPEQLLHGAGICKWFNVRMGFGFLSMTARAGVALDP  |
| Q91YJ3 | LKAQPKQTACWDGVRNYQARNFLRAMKLEDEAFFYHSNCKQ  |
| P62917 | RIDKPI LKAGRAYHKYKAKRNCWPRVRGVAMNPVEHPFGGG |
| P27348 | DTLNEDSYKDSTLIMQLLRDNLTLWTSDSAGEECDAAEGAE  |
| P07203 | LGFPNCQFGHQENAKNEEILNSLKYVRPGGFEPNFM LFEK  |
| O15260 | AIGFKTKLAALTLVVWLFAINVYFNAFWTIPVYKPMHDFLK  |
| P39039 | VKSLCTELQGTVAIPRNAEENKAIQEVATGIAFLGITDEAT  |
| Q9Y224 | NFIVWLEDQKIRHYKIEDRGNLRNIHSSDWPKFFEKYLRDV  |
| A2VDR2 | SPSQAMQEYIAVVKKLDPSWNPQSPEKKGKEANTGFGGPVV  |
| O14669 | FLGPPEAQSFSSSHTRIPRANHWDLELLTPGNLERECLEER  |

|        |                                              |
|--------|----------------------------------------------|
| Q9Z260 | TIMPQWRVSAFIESNIVVFENRWEGLWMNCMRHANIRMQCK    |
| Q9D9J2 | SRSPEQRTVPLSKKDSVIPENIRHKFGSKMVDQLISEDQAR    |
| Q8IUK8 | IFVAPRKGISFSFHVVKVYNRQTIQVSLMQNGYPVISAF      |
| P11912 | YLRVRQPPRPFLDMGEGTKNRIITAEGIIILFCVAVPGTL     |
| P68543 | EVENKNNLSAVPLNNLEPITNIQIWLANKRIVQKFNITHR     |
| Q7L2Z9 | ETLKVPKKMEDLTNVSSLLNMRARDKANEGLALLQE EI      |
| Q99JL1 | DGVLVAELIKFYFPKMVEMHNYVPANSLQKLSNWGHLNRK     |
| P62821 | TTAKEFADSLGIPFLETSAKNATNVEQSFMMAAEIKKRMG     |
| O95372 | AGIVALSCWLP LHRAFPQAANGSAKDLAILQCHGELDPMPV   |
| Q9DA08 | AVEGDEQWILAEVVSYSYSHATNKYEVDDEEGKERHTLSRR    |
| Q497N7 | KMPKNYAQPDVNLHTFDLLSNLHKL LPHNLVEVLHSYRSEE   |
| P01915 | LLVCSVSDFYPGNIEVRWFRNGKEEETGIVSTGLVRNGDWT    |
| P51164 | GLADPNFGFEEGKPCFI IKMNRIVKFLPSNGSAPRVDCAFL   |
| P20959 | TEYGPCREMEDTLNHLKFLNMLS PRGIHIPNCDKKG FYKK   |
| P55064 | IYFTGCSMNPARSFGPAVVMNRFSPAHHVWFVGP I V GAVLA |
| Q9CQY8 | STVTCEFS LKNLSKFDPEFNLLWFFNGTCVSPTDFKNPTI    |
| P51122 | GGLEVLAEKCPNLTHLNLSGNKIKDLSTIEPLK KLENL KSL  |
| P40617 | DVERMEEAKTELHKITRISENQGVVLI VANKQDLRNSLSL    |
| Q6IR37 | PLARALQLALAAAYQLLNL LGNVFLFRSDPSIRGVMLAGRG   |
| Q1RMT9 | ARSEAAAVQPVIGISQRVRVNSKEKKDLGTLGYVLGITMMV    |
| P51153 | EAFSSLARDI LKSGGRRSGNGKPPSTDLKTC DKKN TNKC   |
| Q9C004 | LTILPIDQVKTSHVENDYIDNPSLALTTGPKRTRGGAPELA    |
| Q3U6N9 | PLRSSVPACDSAAGTHPVGNTVAMKQKKKTPNRVSGTNG      |
| A6NLW8 | KQKLAL EINT EESRIQIWFQNRARHGFKRPEAETLESSQ    |
| P56966 | YKYLQLPGKQVVRTKLSQAFNHHLKVPEDKQIIIEVTEML     |
| Q02013 | IGLSVALGHLLAIDYTGCGINPARSFGSAVLTRNFSNHWF     |
| Q9WVS0 | KNPMLCLYHLSNNSVSFFLNNPDSSQGSYYFCSLSIFDPPP    |
| P50221 | RSLQPPAPVWGCLRNPHSEGNGASGLPHYPTT PFSFHQKPD   |
| Q32KM6 | WKEWDQKAQKNGLRHQVFAVNGDHYVGEWKDNV KHGKGTQV   |
| Q18968 | MVLVVAESVWGDEKSSFICNTLQPGCNSVCYDHF FPI SHV   |
| Q92988 | PLPSLWDL PKAGTLPTSGYGNSFGAWYQHSSDVLAS PQMM   |
| Q8K3K7 | AIQAQVPIIPVVYSSFSSFYNVKTKLFTSGTIKVQVLDVAP    |
| Q3ZBK8 | RLQSDFAAFLVGPLQRNSLCNLLSFTYKVKPEGQSFPFCAR    |
| Q2TUM3 | AENQAGVRYISIKPDNRKLANGTNVLGLLVD TLLKEGFHLV   |
| O89104 | VCHGEEAVCSAGATPSMGLANLSVLF GFINFFLWAGNCWFV   |
| Q03287 | EELAIRHKNLDIVFVESGGDNLSATFSP ELADLTIYVIDVA   |
| Q13588 | LGAFLIRESSESPGEFSVSVNYGDQVQHFKV LREASGKYFL   |
| Q9P126 | DGSVISENMFLEDDGKGNMNCAYFHNGKMHPTFCENKHYL     |
| Q9BRX8 | YGPQRRKMMFMGFIRLGWYNNFFRAWNGGFSGNLEGE GFIL   |
| A6NDR6 | KKQLAQDTGLTILQVNNWF INARRRIVQPMIDQSNRTGQGA   |
| Q9NYK6 | DSQVPKYS AKWIDGSAGGISNCTQRILEQRENTDFGLSMLQ   |

|        |                                            |
|--------|--------------------------------------------|
| Q9NQ35 | VSCQCAGKDVKALVDTGCLYNLISLACVDRLGLKEHVKSHK  |
| P97376 | EISGTIAIEMDKGAYIHALDNGLFTLGAPHREVDEGPPPE   |
| Q8R0W6 | ALAALAAVEPACGSGYQQLQNEEEPGEPEQTAGDAPPYSS   |
| P61247 | QQVRQIRKKMEIMTREVQTNDLKEVVNKLI PDSIGKDIEK  |
| P40617 | IVILGLDCAGKTTVLYRLQFNEFVNTVPKGFNTEKIKVTL   |
| Q2KI11 | QDVSITVNLVTLNDSGLYTCNVSREFEFAHRPFVKTRLI    |
| Q3MHY7 | LMKVFPNQILKPFLEDSKYQNLPLFVGHNLLLVSEEPKVK   |
| Q9UK85 | LLRGIDSLFSAPMDFRGLFGNYHKEENQEHQLGNNTLSSHL  |
| Q8N9W6 | ESDLRKFQSVYGSVKEVKIVNDRAGVSKGYGFVTFETQEDA  |
| Q60931 | GNLETKYKVCNYGLTFTQKWNNTDNTLGTETSWENKLAEGLK |
| Q9Y277 | YQKVNEKIETSINLAWTAGSNTRFGIAAKYMLDCRTSLSA   |
| Q6NVG5 | DVSHTEADDDRILYNLIVIRNQTKDSEEWQRLNYDIYTLR   |
| Q497N7 | QSMGGSMFQCSWQHRFMAKNKTWSRKCTSKVHLEKRESTV   |
| P39905 | SGSCDAAETTYDKILKNLSRNRRLVSDKVGQACCRPIAFDD  |
| Q9QY36 | KYYFYHGLSWPQLSYIAEDENGKIVGYVLAKMEEDPDDVPH  |
| Q14696 | GSPTKEKTEEITSLWQGSLFNANYDVQRFIVGSDRAIFMLR  |
| P04390 | DFVEGKGFIDSEDEFDYWRNYERTSQLRNDKYNNISEYRN   |
| Q9JHW2 | ELAQIYAQRGCQLLVYPGAFNLTTGPAHWELLQRARAVDNQ  |
| O02691 | DVQAALTLAREKFRVDVAVNCAGIAVASKTYNLKKSQAHT   |
| Q3SZG6 | LRRSLENRDAQTRQLQDAVTNVEKHFGLCQIFAAAYVRKTA  |
| Q58DS5 | YRGAMGII LVYDITDEKSFENIQNMKS IKENASAGVERLL |
| Q9EP52 | ECMLCLGALWDECCDCVGMCPNRYSDTPTPSKSTVEELHE   |
| Q5ND56 | VSLARIMIQLKQHTLLYKVGILTVTTFLFCRILLFPFMY    |
| P13760 | LAGDTRPRFLEQVKHECHFFNGTERVRFLDRYFYHQEEYVR  |
| Q6I9Y2 | CEFSMGKTLVYDMNLREMENEKIYKEIECSIAGAHEKIA    |
| Q8VI88 | RRSLEHRRNSLLPFQWKATNNSRWMAQVVAEFSLVAFLLL   |
| Q00688 | GDVVHCWYTGTLQDGTVFDTNIQTSAKKKKNAKPLSFKVGV  |
| Q9H0R3 | LCCDNCHSHVALALNLMRYNNSTNWNMVTLCFFCLLYGKYV  |
| P23889 | LIPFFIFSSISKRSIGAI EANQGLFNYPVKPIDTIIARAL  |
| P07361 | TNETLSWLSDKWFFIGAAVLNPDYRQEIQKTQMVFNLTPN   |
| Q9N1R0 | TMGYMPTEMELIELSQQINMNLGGHVDFDDFVELMGPKLLA  |
| P70677 | YLDSSYKMDYPEMGICII INNKNFHKSTGMSRSRSGTDVDA |
| Q0VD07 | LAGAGAAVIAMVHYLMVLSANWAYVKDACRMQKYEDIKSKE  |
| Q9NXJ5 | EQPRKAVVVTGFGPFGEHTVNASWIAVQELEKLGGLGDSVDL |
| Q3ULM0 | FEEAPHLDSQILYRLSPSRNVVEEPPGASPTLALMSSVKA   |
| P07766 | ELEQSGYYVCYPRGSKPEDANFYLYLRARVCENCMEMDVMS  |
| Q96Q83 | WHPVLRRTLKNRIEENTGHTFNSSLNLYRNEKDSVDWHSDD  |
| Q8N7R0 | SNGVTQGCCLVNPTGNLPMWSNQTWNNSTWSNQTQNIQSWSN |
| O43633 | FVLMRANIQAVSLKIQTLSKSNMAQAMKGVTKAMGTMRQ    |
| O60930 | DTFSYMDFVVVYTDGCCSSNGRRRPRAGIGVYWGPGHPLN   |
| Q03402 | VIQGWYNESKGLIFGVGPKQNVSVVGHHTQVWVWKSNLQVAC |

|        |                                            |
|--------|--------------------------------------------|
| Q8BQN6 | LSGGSPFACKVCGKLFSHKSNLTHEHEHFSREKPFECNECG  |
| Q6IMH0 | STYFSKDDFNKAHFTLLGVPNKPLQCLDFTATGQKLCHKYR  |
| Q9NP50 | RAGPSLKTTLKPKVKVKTLSGNRIKSNQISKLQKEFKRHNSD |
| Q5E9C8 | VRESLPELQIEVIADYEVHPNRRPKILAQTAHVAGAAYYY   |
| P20334 | PVCKSCPPSTFSSIGGQPNCNICRVCAGYFRFKKFCSSSTHN |
| Q6PFR5 | YTTERDLREVFSTRYGPLSGVNVVYDQRTGRSRGFVYFER   |
| Q9NPA1 | EEAVQINPKCFYTPKCHQDRNDLLNSALDIKEFFDHKNGTP  |
| Q47427 | KLTQAETTLQNSVLDYIDELNAMDLTTPADLNWPEKQLSTA  |
| O18870 | TIASIDFKRETCVVVYTYGYNREEQNLSLLSPTSEVANIE   |
| Q9CR00 | SPASIAGLQVDDEIVEFGSVNTQNFQSVQNVGTVVQHSEGK  |
| O75323 | GMTIEWGNYWARAIRFRQDNEAVGGFFSQIGQLYMHHLW    |
| Q58DC7 | QVKELSWGVALDKNFPRASINFDYILAADVVYAHPFLEELL  |
| P33783 | KLEGAVTSTRNFWVWVKVGGNESLEVKQSRGVRDGEQGIPIV |
| P50221 | EAEFAHNNYLTRLRRIEIAVNLDSLSEKQVWFQNRMMKWK   |
| O35943 | KQIWLSSPSSGPKRYDWTGKNVVYSHDGVSLHELLARELTK  |
| P20615 | EFLFNMYLTRDRRHEVARLLNLSEKQVKIWFQNRMMKMKM   |
| Q3B7M5 | CLDKFHWKACFHCETCKMNLNMKNYKGYEKKPYCNAHYPKQ  |
| Q32KL2 | ADCSFWERLLARQCRIYELRNKERISVAAASKLLANMVYQY  |
| Q969J5 | SCSMKSSHQKPSGCWQHISCNFPGCRTLAKYQQRWKNKED   |
| Q6Q8B3 | SSCMGGKQMTQNYSTIFAEGNISQPVLMIDINAVLCCPPIAL |
| Q8VHX2 | DQDLTDIRIKLDPCHPTVKNWRNFASKWGMFYDELCLFLEQ  |
| Q9Y337 | NLMLIKLNRRIPTKDVRFINVSSSHCPAGTKCLVSGWGTT   |
| Q1LZB9 | KTDVSAECCASGNIDTAWSNFTHPGNKISLLGFLGLVHCL   |
| Q810P2 | RVMDPNPAPNQYQLPVTLGNTNIPVFRAAPSYSLASTKNWF  |
| Q6P5C5 | GFFRTLQGPQVFFRHCVFHNLCPLLFLAPSGRNLTPAELP   |
| P23356 | AQEGQCRVDDKVNHFHILFNVDGHLIELDGRMPFPVNHGT   |
| P16562 | YTQLVWYSTYQVCGCIAYCPNQDSLKYIYVQCYPAGNNMN   |
| P12544 | KGDDVKPGTMCQVAGWRTHNSASWSDTLREVNITIIDRKV   |
| Q3UP87 | PSVLQELNVTVVTNMCRRRVNVCTLVPRRQAGICFGDSGGP  |
| O08992 | MPMVSGAPAQQQLVARPSSVNYMVAVPTGNDAGIRRAEIKQ  |
| Q60948 | RKKTKTAGLVRKGPNNRSSHNELEKHRRAKLRLYLEQLKQL  |
| P10648 | SLLTPPPLKAFKSRISLSPNVKFLHPSQRKPPPLDAKQI    |
| Q01081 | KFRREEDA EKAVIDLNNRWFNGQPIHAELSPVTDFREACCR |
| P51164 | EDSINCTSEQYFFQESFRAPNHTKFSCKFTADMLQNCGLA   |
| O02659 | PFNEVKTLCAQFQGRVATPMNAEENRALKDLVTEEAFLGIT  |
| Q969U7 | PAVSVGNVQGLAMDLIISTLNMSKIGYFYTDCLVPMVGNP   |
| P17918 | MSKILKAGNEDIITLRAEDNADTLALVFEAPNQEKVSDYE   |
| Q8CCA0 | IWPLFPVFHQFLEQSKYKVINQDQWCNVLEFSRTISLDLSN  |
| P58417 | KFKKMFVGWDFHSNIKTVKLNLLITGKIVDHGNGTFSVYFR  |
| O89051 | TYLPQSYLIHEHMVITDRIENVDNLGFFIYRLCHKETYKL   |
| Q3T024 | GLSDSIPESDTEAYLSSLKENAAARKNGMIGLSDFVVKRK   |

|        |                                            |
|--------|--------------------------------------------|
| P54709 | FYGFLAALFSFTMWVMLQTLNDEVPKYRDQIPSPGLMVFPK  |
| Q3UTB7 | REHFFFRRTAPEAWKNTVRHNLSFRDSFEKVPASRQGGAST  |
| A8WH74 | SIEDVRNQCCTNHGADMISIHNEEENAFILDTLKKQWKDFAD |
| Q7Z5W3 | QRLRLLPPELLRQLFPESPENGPIGLGLDVGCSNGDLSVALY |
| Q6XJV6 | IKPRGQPSCIMAYKVETKETNETCLGRNITWASTPDHIPDL  |
| P60880 | NDARENEMDENLEQVSGIIGNLRHMALDMGNEIDTQNRQID  |
| P27144 | DRLSRRWIHPPSGRVYNLDFNPPHVHGIDDDVTGEPLVQQED |
| Q2NL24 | LKFVSEGDNI PDALGLVEYLNELWQIKPHCEDPTASSLPW  |
| A6NC51 | PNQLILWTGLLALGTSVVGNFQEKQRPETHLAGAFLAFIL   |
| P39687 | ELRNRTPSDVKELVLDNSRSNEGKLEGLTDEFEELEFLSTI  |
| O55239 | QLLSACESFTEIIVSDYTDQNLWELQKWLKKEPGAFDWSVP  |
| Q3T0P5 | HDVPVPLDVVDHRTDTPDANLTQVDAASVYTL PAGADFLM  |
| Q9JI58 | NISDSYFFTFYTEIMSWRSANDESGVIMNKWKDDGEFVKQL  |
| Q6P1N9 | NGMFFSTVGCHEPTRCGEFKKNPDLYLKELLNLAENNKGV   |
| Q2KIS7 | IAYKNWETEITAQPDDGGKVENCATLSGAANGKWFDKRCRDK |
| Q96BF3 | AIVGAWFWGRRSCQQRDSGNSPGNAFVSNVLYRPRGAPKK   |
| Q9Y224 | DRQEAIDWLLGLAVRLEYGDNAEKYKDLVDPNSKTADNATK  |
| Q8BVI4 | RCVQAFRARNWVVASIDVVENEEASASVVVKMTDSFTEQAD  |
| P0A9Z7 | ADKTGASERGARGIVALGPNNAERIVVIYLRDTPASMAE    |
| P18181 | SGFPFKSPGYVLDLIVTFQNKSTFYTCQVSNPVSSKNDTV   |
| P53518 | FNNIVEKLVKWHKNGKYLVLKNNTPYYISFSEVFFDSKVN   |
| O75431 | QILLSDNAASLAVQAFLOMCNLPKVVCRANAEMYSPSGKV   |
| Q3T0I3 | SLPPPAGLNSWVLEPMNSSNGNDNGKNGGLEHVPSSSS     |
| O43561 | NVPESGESAEASLDGSREYVNVSQELHPGAAKTEPAALSSQ  |
| O89104 | LYQVQYEMPLCDQDSTSKTMNLMDGFSAPAEFFVTLGIFSF  |
| P0CG22 | ALLGLNKTLAIELAPRNIRVNCLAPGLIKTSFSRMLWMDKE  |
| Q9D7B7 | IRELHKEFGPYHFVNLAFPCNQFGESEPKSSKEVESFARQN  |
| Q0P5E7 | FPLEELHEHFVPGSRPDLHLNIFHPSLEDIARAESFFTASA  |
| Q6PAM0 | FKSPPIPPHLLQVILNKDTNISCDPALLPEPNHVMLNHLY   |
| Q6PF18 | RSWGRMYYSNGDIYEGQWENDKPNNEGMLRLKNGNRYEGC   |
| P47753 | ITHAPPGEFNEVFNDVRLLLNNDNLLREGAAHAFAQYNDQ   |
| Q8BGB7 | HKVDSESYRKIADSIGCSTNNILFLTDVTEASAAEEDVH    |
| P20160 | DIVGGRKARPRQFPFLASIQNQRHFCGGALIHARFVMTAA   |
| Q3T0Y3 | DVLRKNLKLHGCPTIYAFANNWEKIEQFQSRPDDIMIVTY   |
| Q8NDY6 | GSAADGRRRPREQRSRLRSINARERRMHDLDALDGLRAV    |
| Q9Y337 | MFQGVKSIHPGYSHPGHSNNLMLIKLNRIRPTKDVRPIN    |
| Q8NEGO | FYLQLCPPSDASEDLFVHWENLVYILRPVPEAYS DTRAILA |
| Q7M3E1 | AENGNWDVVGIVSFGSGLSCNTFKKPTVTRVSAYIDWINQ   |
| Q9HCN8 | THVLTGKNLHTHHFPSPLSNNQEVSAFGEDEGEDDLDLWTV  |
| Q32KY9 | QSQTNFICPITQLEMKKPVKNKVCGHYTEEEAIVRMIESKH  |
| P82970 | AVAAEVKNEEEDQKEDEEDQNEEKGEAGKEDKDEKGEEDGK  |

|        |                                            |
|--------|--------------------------------------------|
| Q9H063 | DFSTARSHFEFSREPSLSWVVNAVNCSLFSAVREDFKDLKPQ |
| P0C866 | VQSTGEREAQRYFEHALTLRNTTLFLRHNKDLVVQTAQPDQ  |
| Q9H7J1 | IGGALLFALRYRVTGHEFDNNGGRDYALRGPEHPGSGGAP   |
| P33792 | I IKNNTNKVMVDWADYCGSYNNKCRVQLITRPYSEKKIEI  |
| Q9NXJ0 | TAHFANQANTTTNMSVLVIPNMYESNPVTPASSSAPPRCNN  |
| Q9XT56 | SSPRVEWKFTHGDIRGLVCYNNKITASYENRVTFSDTGITF  |
| Q3UZ26 | IPEEILNKILYHSSFSVMKENPFSANYTTMMKEEMDHSVSPF |
| Q96B33 | PKPKPKVGFPMRPRPKAYTNSVDVLDGEGWESQDAPSCST   |
| Q91V08 | BQIPVNKTYAACPNWIGVENKCFYFSEYPSNWTFAQAFCM   |
| Q9JJZ6 | RRDGKDSASLFFVARILADLNQQAPAPAPAERREGAAARKA  |
| O95749 | DIKKYCVHYLEDVGSFEYTRNTLKELEAKAYKQIDARGGNP  |
| Q9WV93 | AFGHHPHIAHPLLLPQNGHGNAGTAASPTPEHHQGRLASAH  |
| Q5SX19 | TMLGLARLEQQVSLLCFSSGNYYNQGETRKKELLQSCAVLG  |
| A2RRY8 | NSQTEDGQRPEWTFYPRFSSNIHTYHIGKQCFFNGVFRGNR  |
| Q96S21 | LPLPVTIKSHLKSFSMANGMNAVMMHGRSYSLASAGGGGGS  |
| P70280 | LFAVVARGTTILAKHAWCGGNFLEVTEQILAKIPSENKLT   |
| P53805 | SPPASPPVGWKQVEDATPVINYDLYAISKLGPEKEYELHA   |
| C9J442 | EPVQGLLSQNHSCRDPCCGNLLVLCFLVWQVRHCWHQVT    |
| Q00322 | DKAKRRNQEMQQKLVELSAENEKLRQVEQLTRDLAGLRQF   |
| P62079 | DFTQEYWQCCGAFGADDWNLNIYFNCTDSNASRERCGVFFS  |
| Q9JL95 | QRVCRRCYRGNLASVHSYSFNYQIQNLARKINQSIVWIGGI  |
| Q29461 | GTILPNNYVCYVTGWGRLQSNQALPDILQQGKLLVVDYATC  |
| Q9H6Z9 | KIALEYIVPCLHEVGFCYLDNFLGEVVGDCVLERVKQLHCT  |
| Q5I3B2 | DAPNSSVVHVSSPEGGDTSGNGAQEKTVDGTECHLLDFASP  |
| Q99KL7 | IKLNKAEIEQSQRVVKADIVNYNQEPISRVTNPPRSSMCAV  |
| Q9HD33 | RLHHTLSRKGLEEFFDDPKNWGQEKVKSQAATCQQLRNK    |
| Q8N128 | AAAAAFGESAGQMSNERGFENVELGVIGKKKKVPRRVIHFV  |
| Q3TB92 | VDCTRVENNELPSPNLNSMNVVRMGQVNSLSCSTKNTSVD   |
| P97801 | DICETPDKPKGTARRKPAKKNKSQKKNATTPKQWKVGDKC   |
| Q9NY30 | SHWHSDCPSKGQAFRCIRINNNQNKDPIERACVESNVDFS   |
| Q8NFX7 | EGSTS FVRRSQWMLEQLRQVNGIDPNGDSAEFDLLFENAFD |
| Q8BK26 | PVMIQQKSDAKWSEVSHTFSNYPPGVRYIWFQHGVDTHYW   |
| Q9NZQ0 | SFDALDAWLAEMKQELGPHGNMENIIFVVCANKIDCTKHRC  |
| Q0VCS6 | KSWQGCEYFCIAENSTMLKINTQEVLEFAMPQSYSEFFYSY  |
| Q47456 | TGRYLQOGLVEEGYQADLFNNGRDGLGAASKGQYDLIILDV  |
| Q9Z2B3 | LDYSRGRDRNFISFLFTMAFFNLFVPLFIHTSYRFMEQKFS  |
| Q9GZV9 | PQYHFLVSLGRAKRAFLPGMNPYPYSQFLSRREIPLIHFN   |
| P47962 | NRFGMDKIYEGQVEVNGGEYNVESIDGQPGAFTCYLDAGLA  |
| P27701 | NSLSVRKGFCEAPGNRTQSGNHPEWVQYEGCMEKVQAWL    |
| Q7Z5L3 | KSPHEGYEVLKFDDVVTNLGNHYDPTTGKFSQVIRGIYFFT  |
| Q2YDP3 | FDFLKDLVASVPDMQGDGEDNHMDGDKGPRRGRKSGSSGRK  |



|        |                                             |
|--------|---------------------------------------------|
| Q9NXV2 | RDPTYFGPVLNLYLRHGKLVINKDLAEEGVLEEAIFYNITSL  |
| Q99LU8 | KQFLHVLRSRKDKTGIVVNNPNQSVFLFIDRQHLQTPKKNKAT |
| Q5E9Q4 | ALQDHFkWVVKQCEFAKQAQNPQDQPKLDLSFKEGQTIKLN   |
| Q8WW62 | FARMRKMAFFLIQSNYNYVNWSTAQSLVIILSGILQLYF     |
| Q6PZD9 | PGSYDPRAVAVKEEPRGPEGNRGTSRGSYNPLQYQVAHCGQ   |
| Q9UKR0 | VLGLSQAATPKIFNGTECGRNSQPWQVGLFEGTSLRCGGVL   |
| Q45KJ6 | ERRPKGKTLQKRKPKGDRCYNCGLDHHAKECSLPPQPKKC    |
| Q2KID0 | GDIVVGRITEVQQKRKRVETNSRLDSVLLLSMNLPGGELR    |
| Q91WK7 | ADPNQDGLGNTPLHLAACTNHVPVITTLRGGARVDALDR     |
| Q9BXJ2 | VTSFAICASGQPRGNQLKGENYSPRYICSIPLPGPPGPPG    |
| Q15305 | KIKIGVVGGSDFEKVQEQLGNDVVEKYDYVPENGLVAYKD    |
| Q61955 | SRDQPEQEIQVAQSIQHPCYNNSPEDHSHDIMLIRLQNSA    |
| Q8VI88 | EEESERIRTSRNRSLRHRRNSLLPFQWKATNNSRWMAQVV    |
| Q54830 | IAELLEDSKSTLSQAYGATENVADYTLWGLLEDLQSSDEET   |
| Q43402 | NTKFTMDCVAPTIHVYEHHENRWRCDPHHDYCEDWPEAQR    |
| Q9TVC8 | RQVEPTVTIFLSRTEALNHHNLLVCSVTDYFPGQIKVRWFR   |
| P78346 | KALRGLVETA AHLGYSVVAINHIVDFKEKKQEIIEKPVAVSE |
| Q9Y2B4 | RNRLRTVLKNLSLLKLLKSSNRRIQELHKLAKRCWHSLLSV   |
| Q96HS1 | YIVCRALQFPPEGWLRLSLNNGSITHLVRPNRGRVALRTL    |
| Q8BGB8 | RLRTQSLQVLFSELI PWAIQNGRRAPCVLNIYYEQRWEQPL  |
| A8MUZ8 | LQLEQKGELWREGRVFLQDQNPRESALKKTHMISMHPITR    |
| P54846 | LRGCGRDEALRLKQRRRTLKNRGYAQACRSKRLQQRGLEA    |
| Q96DX8 | FQELIQEAKPRATWTLKLDGNLQLDCLAQGWKQYQORAFGW   |
| Q3T112 | WDKKGPLYVVDENGTSLSGNMFSTGSGNSHAYGVMDSGYR    |
| Q8BPB0 | MLPEGEDLNEWVAVNTVDFFNQINMLYGTITDFCTEESCPV   |
| Q28145 | VHATEGLDWDKDATGTLVGNVHSRIINPLRLFKVQSFVP     |
| Q9CZQ6 | ILHLNNINKTMTSGDPGKMANATGKCLTQPLNDLCQELRDK   |
| Q6ZUJ4 | SPQKATDADPGSLKQAFDDHNIVETVLDLEEDYNVMTSFKY   |
| Q6UWN5 | NADALPPDYSVVRGCTTDKCNALMTHDALPNLSQAPDPPT    |
| Q9H741 | CWPNGCCSAYEYCVSCLLQPNKQLLLERFLNRAAVAFQNL    |
| Q5SYH2 | LHELLEGSDIYFPEIVKPPRNPPELVARLEKIKIQLANEYK   |
| Q86Y82 | PGPSGPQLRDFSSIIQTCSGNIQRISQATAQIKNLSQLGT    |
| Q96G27 | AFRHRRAKLRLQQQRQREINLLAYHGACHGAGFPPTGSL     |
| Q9D7W4 | CGARGPNDWNLNIYFNCTDLNPSRERCVPFSCCVRDPAED    |
| Q91V37 | LGFRFDVAWFLTETSPFMWSNLGIGLAISLSVVGAAWGIYI   |
| Q9D198 | ARKLNHQEVVEEDKRLKLPANWEAKKARLEWELQEEKKKE    |
| Q62447 | QYVQDMGQEDVLLPLAWRIVNDYRTDLCLLYPPFMIALAC    |
| P51177 | VPDNEEATQYVEAMFRAFDTNGDNTIDFLEYVAALNLVLRG   |
| Q2HJF4 | QDVRYSPDTKLLVRLSDTYNRSFLESITVNTENLLQVETT    |
| Q8IUI4 | DVYGNSSGRKHRGHSESPKNGAHSVTQAGVQWHDLSLQ      |
| Q96LD8 | CSDHVSFISPEVTQFIKCTSNPAEIAMFLEPLDLNKRUVF    |

|        |                                            |
|--------|--------------------------------------------|
| Q91XB7 | YSSQLGGYPAPGADVAFSVNNLLGDPVANMAMAYGTSTIASQ |
| Q8VCH9 | VICKTSVLDEHAGRPFLNAANDADLCNLPKKTDDYAMLVTM  |
| P28063 | SRATAGSYISSLRMNKVIEINPYLLGTMSGCAADCQYWERL  |
| Q9CQC3 | TLRSHHKYSEFVLVYSWHRNREAFPKDYDIESLETVKNL    |
| Q99075 | ADLDLLRVTLSSKPKALATPNKEEHGKRKKKGLGKGRDP    |
| Q96MH2 | EEMFAKGQPVAFYNTTQFLMNDRDPEEPNLDVPHGISHPGS  |
| P42270 | CHNIDPETQRPRKVFDTISDNAANSQVILGGRIKPDDEL    |
| P12544 | SVVVSLLLIPEDEVCEKIIGGNEVTPHRSRYMVLVSLDRKTI |
| Q7YS81 | EILRSIQYIERLQALLSSLNQEERDLRYRGGGGPQAAVPS   |
| Q9QYB1 | KKYRNFDIPKGMTGIWRYLTNAYSRDEFTNTCPSPDKEVEIA |
| P11911 | LTVNLGEEARLTCENNGRNPNIWWFSLQSNITWPPVPLGP   |
| Q9P0N9 | TFKIKVMALNSAEKITKFLNIPQDSSDAIVSKAIDLWHKH   |
| Q04741 | QKLEEEGPESEQKKKSHHINRWRIATKQANGEDIDVTSND   |
| Q7Z6A9 | CLRRHQGKQNELSDTAGREINLVDAHLKSEQTEASTRQNSQ  |
| P08833 | LAKAQETSSEEISKFYLPNCNKNFYHSRQCETSMDGEAGL   |
| Q9CRA9 | TALSKRVEAMKQYQEEIQELNEVARHRPRSTLVMGIQQENR  |
| Q75VT8 | KAKAKNLQKQREERESCWAQINFNTDMSFDNSLFAISTKMT  |
| Q9Z1Y9 | AYKQVKLGEDAFNSVHVSNPESGNNYASEKTADGAECHL    |
| O89104 | MGLANLSVLFGFINFFLWAGNCWFVKETPWHGQGDQGGQ    |
| P06837 | PSEKAGSAETESAATTDNSPSSKAEDGPAKEEPKQADV     |
| Q9ULW5 | ANGARPARSGTALSGPDAPPNGPLQPGRPSLGGGVDFYDVA  |
| Q8N4T8 | MIQQQGSIVNVGSIIVGLKGNSSQSVYSASKGGLVGFSRAL  |
| P02662 | VALARPKHPKIKHQGLPQEVLENLRRFFVAPFPEVFGKEKV  |
| P01906 | AVGKHTLEFMMRQSNSTAATNEVPEVTVFSKFPVTLGQPNT  |
| Q3U1J1 | KYQALGRRCREIEQVNERVLNRLHQVQRITRRLQQRERFLM  |
| O95456 | TDTTHLSSTEAFVCFYHLKSNPSVFLCQCSCYVAEDQQYQW  |
| Q9UBS3 | FKDFGFFGQNTGSKKRFENHFQTRQDGGSSRQRHHFQEF    |
| P61087 | AVQRIKREFKEVLKSEETSKNQIKVDLVDENFTELARGEIAG |
| Q58CY8 | TDVFSATWNSVMITFGCCGVNGPEDFKYASVFRLLTLDSDE  |
| P09237 | LEAKLKEMQKFFGLPITGMLNSRVIEIMQKPRCQVDPVAEY  |
| A5PKI3 | GISKACPEKHFAFKMASGAANVVGPKICLEDNVLMSGVKNN  |
| Q9CZD0 | PSEHPSTTSELPLSLTKPQNSRRARSWLSPSVSPVSPVSGP  |
| A4QPB2 | DQLPDLMLKAVNVKVVGTNPHADRNGGAATCASSRPTQP    |
| O14818 | VTVEYITRYIASLKQRYTQSNRRPFGISALIVGFDFDGT    |
| Q96EY5 | KSFAQKSGYFLCLSSLGLENPQENVVADIQIVVDKSPPL    |
| P12658 | VDDTKLAEYTDMLKLFDSNNDGKLELTEMARLLPVQENFL   |
| Q16637 | GNREEQNLSDLLSPICEVANNIEQNAQENENESQVSTDESE  |
| Q86UP9 | AAAAAAMLPAQEAALKYHTNYVRNSRAIGVLWAIFTICFA   |
| Q9H741 | ITDELGYVCERKDLLVNGCCNVNVPSTKQYCCDGCWPNGCC  |
| Q8IXQ8 | LLQHITIGTVLQIKVYRDFINIPPEWQEIYDLIPEAKFPVT  |
| Q9WV68 | EVMTAVDQALQEFKINILINCAAGNFLCPASALSFNAFKT   |

|        |                                            |
|--------|--------------------------------------------|
| F1MK05 | VSLALIATLVYALFSRHAQNIHPENQELVRVLRQEQTEQ    |
| P21237 | SYFGCMKAAPMKEVNVHGQGNLAYPGVTRHGTLESVNGPRA  |
| P30793 | AQPADGWKGERPRSEEDNELNLPNLAAAYSSILSSLGENPQ  |
| P19652 | LPLLEAQIPLCANLVPVPIITNATLDRITGKWFYIASAFRNE |
| Q15014 | KQLFQLPAKKNVDALIEEYANCKKSQGNVDNKEYAVNEVVA  |
| A0JN11 | DEVRPHTSAERKKRERGLGHANGEPLPTAGQEPARHDLASD  |
| Q80W21 | RKHNLGTEEEERIRVDILENQLMDNRMVLARLCYNADF EK  |
| P50236 | AIYLMRNPREDILVSGYFFWGNLTVKNPGSLGTYFEWFLQG  |
| Q16763 | VYKEVTTLTADPPDGIKVFPNEEDLTDLQVTIEGPEGTPYA  |
| Q9NRD1 | LPENILLELFTHVPARQLLLNCRVCSLWRDLIDLMTLWKR   |
| P09661 | PVIENLGATLDQFDAIDFSDNEIRKLDGFPLRRLKTLN     |
| Q32KU6 | DYRSDAVDKIQSMLHCCGVNTNYRDWKTNYSEKGFPESSC   |
| Q9H2W2 | CAPGTETKCLKPQLPLEVDVNCLPEPNGVGGGSDSSSQGQ   |
| Q9N0V4 | YEERQYVGDAPDYDRSQWLNEKFKLGLDFPNLPYLIDGTH   |
| Q9R1P4 | LLIAGYDDMGPHIFQTCPSANYFDCRAMSIGARSQSARTYL  |
| P21658 | RLYTTPSFHDECKFRETLNPNYNAYESDLYRGTYIALSKY   |
| Q62000 | TLAENQLRLPVLPPKLTLLNAKHNIKSKGKANTFKKLN     |
| Q2M1V0 | IFHFTHYPDVHIRSQAARINLPEARVQIWFQNRQAKWRKQ   |
| Q95983 | TMPITGQLSAAVEKNPGVWLNNTQPLCKAFMVTDEDIRKQE  |
| Q8IWZ4 | KLLKKMQSLWEKACENQRNLNVETTRISHWKAFGDILYRSE  |
| P70378 | ANPDGSIQGTPEDTSSFTFNLI PVGLRVVTIQSAKLGHYM  |
| Q66JS6 | GGTAGGDRWEGEDEDEDVKNWDDDDENKEEA EVKPEVKI   |
| P32243 | LTPMHHLPGGATLSPMGTNAVTSHLNQPASLSTQGYGA     |
| Q86TL2 | VDNFLMRKGTAKALEERGANQDSRNGSKVRYRRAASHEES   |
| P0DMS9 | PKYWCRGYFRDYCNIIAFSPNSTNHVALRDTGNQLIVTMS   |
| Q9D720 | NHCYQVHNRNATVDRKLEDFINNINSVLESLEYIEIKKGVTE |
| Q80XC2 | VLPQVYNVRTVSLPLPDLGANNLETNMGSDASPFRRSGTFMK |
| Q9JJV3 | LLGFTLMFWCEFTASFLFLNAASGLHINSLTQPWDPAGT    |
| Q5TZF3 | GSGKLLKEDKNTILSACRAKNEWLEHTHEASINELFEQRQQ  |
| P20181 | LSDSTPLEPPPLYLMEDYVGNPVVANRTSPRRKRYAEHKSH  |
| Q9D7W4 | VVGGVMSVLGFAGCIGALRENTFLKFFSVFLGLIFFLELA   |
| P12544 | ASWSDTLREVNITIIDRKVCNDRNHYNFNPVIGMMVCAGS   |
| Q08DJ0 | NVTNKNDPKSINSRVFIGNLNTAIVKKVDIEAIFSKYGKIV  |
| Q9DAK2 | EALLPYRQILPILNIFKNMNVNSGDGIDYSQQKRENI GDL  |
| Q9R0P3 | KANYRMYSYVTEELPQLINANFPVDPQRMSIFGHSMGGHGA  |
| Q9WU63 | DRAEMTVFVRSFDGFSSGQKNQEQLLTLANILREEGKVFNE  |
| Q3ZBE1 | ECRANREKMKGELGMMLSLQNVIQKSTTPGETKLLASEIYD  |
| Q5UKY4 | RIETTDGIFQERHSIQVPGENRTVVCEAIAASKPAMQILWTP |
| Q3T0Z4 | GVMAIPATMMSLAARKRACCNNKTGMFLSSLLNATVIGAA   |
| Q13162 | HTLRGLFIIDDKGILRQITLNDLPVGRSVDETLRLVQAFQY  |
| P28293 | DSGGPLVCSNVAQGIVSYGSNNGNPPAVFTKIQSFPWIKR   |

|        |                                                                            |
|--------|----------------------------------------------------------------------------|
| Q8IZR5 | VNTGLSAFLFFIASIVLALNHRAGAEIAAVIFGFLATAAY                                   |
| O70255 | DGNPERYDVSI LLWKLQFDDNGTYTCQVKNPPDVGDLVGTI                                 |
| P78369 | GGVIFCFSISDNNKTPRYTYNGATSVMSRRTKYHGGEDFKT                                  |
| Q96A05 | AVNAAGGVEVYSGNQRIKVSNTLESRLDLSAKQKMPERMA                                   |
| Q9NZQ7 | PVEKQLDLAALIVYWEMEDKNI IQFVHGEECLKVQHSSYRQ                                 |
| Q8WVD3 | PVTCPICVSLPWGDP SQITRNFVSHLNQRHQFDYGEFVNLO                                 |
| Q14002 | GLLLTASLLTFWNLPNSAQTNIDVVPFNVAEGKEVLLVVHN                                  |
| Q8TDQ7 | WNNFFKHIDIDPNNAHILDGNAADLQAECDAFENKIKEAGG                                  |
| Q9Y5K8 | STTVIQNVNKAQVKIRAKKDNVAGVTLPVFEHYHEGTDSEY                                  |
| P53518 | SIRGCIKLIYQPASVPSPVFNIVEKLVKWHKNGKYLVLKNN                                  |
| P49720 | LYELKEGRQIKFYTLMSMVANLLYEKRFPGPYTEPVIAGLD                                  |
| Q9CPZ3 | PLKKKVLAYLSSISLEEWPGNTVSNTEFCSEQKTDLSKELLV                                 |
| Q0P5A4 | RGVDNMVAINLIVQHIQDILNGDICKWHRAGANGRSHKRTF                                  |
| Q8TCF1 | SFKDCAERELVAVICPYCEKNFCLRRHQSDHECEKLEIPK                                   |
| Q9CR10 | PCSLPPELEPPTNCCMSGCPNCVWVDYAEALRLLYQDGGEK                                  |
| Q3T093 | PPSSVAISNHVTPPPPIKSNHGGSDADILLDLDSPAPITT                                   |
| Q8WXB1 | LCSNHSVILLACRIRYERDNNFLAMLERQFTVRKVHYDPEK                                  |
| Q9D9S3 | EMEMLSMFPNQGEVKLEDVNALTNIKRYLEGTREALPPEI                                   |
| Q3TT38 | QSDENNLTDPGGSEFDSISKNTWAPVPEQSEQDQRLSQSS                                   |
| Q99MS4 | RLQQVQVKIIDNSLCEEMYHNATRHRNRGQKLLKDMLCAG                                   |
| P09237 | EIMQKPRCGVPDVAEYSLFPNSPKWTSKVVTYRIVSYTRDL                                  |
| Q3TR08 | AVIGLFCRQYDI IKDNDNPNPKEKGGPEQSPQGRPVGTT                                   |
| Q28918 | HVRSMKGLQQAVLAIGQELNRRALGGPAPA AWINQVRRRG                                  |
| Q96BF3 | GAWFWGRRSQQRDSGNSPGNAFYSNVLYRPRGAPKSEDC                                    |
| P16563 | DFTSLLTNQLQVQREIVNKHNELRRSVNPTGSDILKMEWSI                                  |
| Q9H8M1 | VVTLVKPHLVKASCTDGRLFNHLETIWRFSPGLPGYPRCT                                   |
| Q9CQ79 | LDRHLA I LAKKHLETKFLKLNVEKAPFLCERLRIKVIPTLA                                |
| Q8CGR5 | SGWGTIASPIARYPTALQCVNVNIMSEQACHRAYPGIITSG                                  |
| Q9ESN5 | NHFPLPEASTPKKRNIQDSNAQLITLNEILEMLINRMFDV                                   |
| Q16560 | YVPNKGVI G D P L L T L F V A R L N L Q T K E D K L K E V F S R Y G D I R R |
| Q810N9 | REMKSVERNRGLWELQKLNELLQELFTLQKLVKDEE                                       |
| P68252 | ARRSSWRVISSIEQKTSADGNEKKIEMVRAYREKIEKELEA                                  |
| Q8BXP5 | NTALMLAAQAGHMSLVTLNLLNYFAGLDLERRDQRLTALMK                                  |
| Q8IXQ9 | GASRILANDIDPIAGMAITLNCELNRLNFPFILIQNILNLE                                  |
| Q3URF8 | VREAPQIYSLSSSSMEVFNANIFSTSCFLKLLGSKLLYCS                                   |
| P41317 | QGLRGLQGPPGKVGPTGPPGNPGLKAVGPKGDRGDRAEFD                                   |
| Q5BVD1 | PVDELELSVLERQPEENTPLNGADKVPFSLDEEVPPAEANK                                  |
| Q2HXU8 | LQKTIQQQDNLSQQLGNSNNLSMEEFLKSQISSVLKRQE                                    |
| Q8BFR6 | SFKGCTDVELVAVICPYCEKNFCLRRHQSDHDCEKLEVAK                                   |
| Q9TU47 | GCRIIGRMCVGNRHGLLVNNTTDQELQHIRNCLPDSVQIR                                   |
| Q96LL9 | PRTPPPTSRTHDGSRASPGANRTMFNFDAFYQAHYGEQLER                                  |

|        |                                             |
|--------|---------------------------------------------|
| Q969U7 | LNMSKIGYFYTDCLVPMVGNPNPYATTEGNSTELSINADEVYS |
| Q62422 | CHGGHKDIVEVLFQTQPNVELNQONKLGDTALHAAAWKGYAD  |
| Q9NP50 | LKTTTLKPKKVKTLSGNRIKSNQISKLQKEFKRHNSDAHSTT  |
| Q9GZN2 | VALPRGSSPSVLAVSVPAPTNVLSLSVCSMPLHSGQGEKPA   |
| Q16629 | GELERAFSYYGPLRTVWIARNPPGFVFEFEDPRDAEDAVR    |
| P62826 | SNYNFEKPFWLARKLIGDPNLEFVAMPALAPPEVVMDFAL    |
| Q8R1F5 | VPQGADRAAVKGETVVFVENLKAAGVLAQENLVGLLEPI     |
| P48755 | RPCEQISPEEEERRRVRERKNLAAAKCRNRKELTDFLQA     |
| Q6URK8 | DGSTHVYASPAILLPMEQRNQLAGVKQQLYHPALPTLRHM    |
| Q8WVF8 | RIMDDNNRTLDFKEFMKGLNDYAVVMEKEEVEELFRRFDK    |
| Q9R0Q4 | SQPKNLDPALPGRWGGRSAENPPSGSVRKRTRKNKQKAPNG   |
| Q5HYI8 | VKLSRFFDKVIEKRYFLREGNQIPGFPPDRKRFAGTLLKSLH  |
| Q8K2J7 | NTGSHTLHSRAETTPSSPTNPNPGRNGHPEYIAYVLPVFFVM  |
| Q32KX8 | WDWKQWGGILPQSLDLLVCINSHISPLSCTEGLFRAAGHL    |
| Q17QI5 | IVYLCITDDDFERSRAFNFLEIKKRFQTTYGSRAQTALPY    |
| Q9CQQ4 | RCSEVRLLVGSKDDERVPALNLLICLVSRYFDQRDLADEPS   |
| Q3UPR9 | AGQCQPTTRVRRRSVRQEPLNGGAPCPPEERAGCLEYSSS    |
| P14191 | ENMAYTDGSVSVVAYALGIANGQTI EATFNQAVTTSTQWSA  |
| Q8K2Y7 | KNWGEKVKSGASWTCQQLRNKSNEDLHKLWYVLLKERNML    |
| Q8TAG5 | LSSQAKFTEFPRNVTATEGQNVEMSCAFQSGSASVYLEIQW   |
| Q3SYT7 | LQAAAGMYEQKGEWNRKSPNLSKCGEELGRKLKLVLELNF    |
| Q8BFU0 | ALIILNCMDYSQCQGNRWRNRKRASYVSNPICKGCLSCSKD   |
| Q4G0X4 | IFSTSCFLKLLGSKLFYCSNGLSSITSHLQDPNHLTLDW     |
| Q14613 | TRTATVCGRELPGDPSPLLKNAISLPVIGGPAQLTLPTAQA   |
| F2Z333 | VLLQWRLAPAAARRVRAFALNCSWRGAYTRFPCERVLLGAS   |
| Q3T0X5 | VDNHIGISIAGLTADARLLCNFMRQECLDSRFVFDRLPVS    |
| P51945 | LGCVGLSCFYLAVKATEEERNVPLATDLIRISQYRFTVSDL   |
| Q3T113 | GITFTCKLQRNQSVSISVVLNVTFFPPLLSGNDFTAEEGSD   |
| Q2HJH8 | INPYLETTKLIYKDLVSVRKNPQTKKIQTSSIFKVTAYDS    |
| Q17QW4 | PGLAALPYLRLRHPLGVLGINYQQFLRHYLEHYPIAPGRIQ   |
| Q9GZP4 | GIIIMGEDDDSHPSEMRLYKNIPQMSFDDTEREPDQTFSLN   |
| Q2HJ22 | GGALYALCGLLALVPLCFANIVVREFYDPTVPMSQKYELG    |
| Q13277 | IRKSQHSVLSRKFVEVMTKYNEAQVDFRERSKGRIQRQLEI   |
| Q6PCP5 | GGSAAATSNPHHDNVRYGISNLDAIEGASDDMTVVDAASL    |
| P01906 | TLICLVDNIFPPVUNIITWLSNGHSVTEGVSETSFLSKSDHS  |
| Q08DU1 | LYGAKLIAQKQVRNCPHFKNVAVSGSECLLSMVEDGNPHHY   |
| Q2TJ95 | FKRGTETRVRDILQHPSAKGNLCPPTSETRTRCIVQRKKCSK  |
| Q08E62 | EGLGRCSLESSDCELDSSNSGFGPEEDSAYLDGVSLPDF     |
| P09630 | NSFYQEKDMLSNCRQNTLGHNTQTSIAQDFSSQGRTAPOD    |
| P62956 | KGRCVASEYFLEPEINLVTENTENILKTVRTATPFPMVSLF   |
| Q9H1R2 | EVPIKHKFKECINFHCCRLNGGNCLVHCFAGISRSTTIVT    |

|        |                                               |
|--------|-----------------------------------------------|
| P01189 | MEVRGWCLESSQCQDLTTESNLLECTIRACKPDLSSAETPMFP   |
| A0PK84 | GQTRYQVRKGM AVRAR PWRKNLQEVFGKRWLLGLLVPMFNV   |
| A5PJN0 | DAFFYHMLTKLGVDDAVKEENVQKMKQQFMAPHDVSKDGC I    |
| Q3TT38 | GTTDKDVLISEFQRLLEGFLNPAGCAFFLDMTNWNLQAAIG     |
| Q9UKL6 | YYFDNPGGQIPSWLINWAAKNGVFNFLKDMARACQNYLKKT     |
| Q8IWL1 | IQEACARAGGRIAVPRNPEENEAIASFVKYNTYAYVGLTE      |
| Q8N3J9 | MRVHTGEKPYVCSECGRGFSNSSNLCMHQRVHTGEKPFKCE     |
| P43346 | TRIKKISIEGNI AAGKSTFVNILKQASEDWEVVPEPVARWC    |
| Q9D1X0 | EPELEAEATEGDEPDLEQEMNPEQEPEPEPEPEPEPEPEPE     |
| Q8N801 | IATYNFKNEGRKKPPLVQRNNPVLNDLPQYMPDFDLK         |
| P56537 | TVQIRRVEERLSALGNVTTCNDYVALVHPDL DRETEEILAD    |
| Q32L77 | CLNTKLAKIKSKALLNEETMNSGIERDTGLPATGFGALFT      |
| Q9D7V2 | DTLQGIALKYGV TMEQIKRANKLFTNDCIFLKKTL SIPILS   |
| Q9DCI3 | DLLFVTL LWI IELNVNGGIENTLKKEV IHYDYSSYFDIFL   |
| Q96EL1 | RGRSRQPLVLGDNCFADLVHNW MELPETGSEGGDGGHRAR     |
| Q9ULZ2 | IRQEIDI PRIKHYKVM SVGQNYTIELEKPVTL PNLFSVIDY  |
| Q8BVH9 | LN VYKVLK PGRSVLFRDYGLNDHAMLRFKAGSKLGENFYVR   |
| Q3UP87 | RQTF SVQRIFENGFDPSQLLNDIVI IQLNGSATINANVQVA   |
| Q9BZ81 | LLYKFKMKQRILKEDMLKIVNPRYQNF AEIHRRASEHIEV     |
| P0CI00 | HMISMHP IIRKDTSTSM TENS LILEDPF EYNDSGEDCTHS  |
| O43291 | MVLILFLGAS MVYLIRVARRNQERALRTVWSSGDDKEQLVK    |
| Q96NT3 | YQGHFIVLRGYNRATGCI FYN NPAYADPGMCST S ISNFEEA |
| Q8BHH8 | NAESNHLSDKLSQKLYPDTTNKRTHHTYGSFWLTLHVIFL      |
| G3N131 | VGKGLVQTKGTGASGSFKLNKVASVD AKPTATKVATKTK      |
| Q9BXJ2 | TVIYLQPEDEVWLEIFFTDQNGLFSDPGWADSLFSGFLLYV     |
| Q3ZCC4 | KQLALERRQAKLLSNSQSLGNDLSVNT PSTQTSEAGSTGEE    |
| Q91W78 | PEDDSAKHGGRI RTF PHERGNWATHIYI PYEAKEDFRDLLD  |
| Q27956 | EKARLVELYRI IAYLGASLG NITRDQKVLN PYAHGLHSKLS  |
| Q64124 | REPRQRHTANARERDR TNSVNTAFTALRTLIPTEPADRKLS    |
| Q6PIL6 | ESISAQLEEBASSTGGFLYAQNSTKRS IKERLMKLLPCSAAK   |
| Q3T024 | HKQCSHKEYVDLADLEQKWKNLCLPVEKFRALLQLDPCEDK     |
| Q86UD3 | DCTSSAAPVVKTVEDCGSLVNGQPQYVMQVS AKDQQLLSTV    |
| Q8IXM7 | KITRFGMSSCPQVPM EERISNLRLNPTLASCQYYFEKI HPP   |
| P51911 | TKYGVKPHDIFEANDLFENTNHTQVQSTLLALASMAKTGN      |
| Q9JHL0 | CSRPGVKRNEKIYEQRNRQENAQSAAAQTYSLARQVWPGP      |
| P62491 | IGDSGVGKSNLLSRFTRNEFNLESKSTIGVEFATRSIQVDG     |
| O35083 | I LFLA I LAIPVCAVRGRNVENMKILRLLLLHAKYLYGIRVE  |
| A6H6X4 | YITQRQTLTKYPDTFLEGI VNGKILCPFDADGHYFIDRDGL    |
| Q6IB77 | KSLRKS LPASLKVYGT VPHINHG NPFNLKAVVDKWPDFNTV  |
| O60939 | SCYTVNHKQFSLNWTYQECN NCSEEMFLQFRMKI INLKLER   |
| Q9NWS0 | AEVDLPKLDGALGLSLEIGENRLVMGGPQQLYHLDAYIPLQ     |

|        |                                               |
|--------|-----------------------------------------------|
| P68254 | SELRSICTTVLELLDKYLIANATNPESKVFYLLKMKGDYFRY    |
| Q5BVD1 | ITVIIIGLCLAAVTVYDEDENEIILELSSNKTFIFMLKIPEE    |
| Q61205 | RVVVLGGLPRGQHPNPLREKNRQVNELVRAALAGYPRAHFL     |
| Q7TQD2 | EMHGKNWSKLCCKDCHVIDGKNVTVDVDIVFSKIKGKSCRT     |
| A6NJW9 | TVLHGNSVLQQTTPAYIKVQTNKMMVLSCEAKISLSNMCIYW    |
| Q5SRD1 | GAGGAGYSHADLAGVPLTGMNPLSPYLNVDPRYLVQDTDEF     |
| Q16854 | KTTKLHFEALMNI PVLVLDVNDDFSEEVTKQEDLMREVNTF    |
| Q15771 | EEFSEAQDMYYLETSAKESDNVEKLFLLDACRLISEARQNT     |
| P00642 | LSSEHFPPYVLFLEGSNFLTENISITRPDGRVVNLEYNNGIL    |
| Q14627 | PREDWSVYPGPSSTMGTVFVNDVTSSPAAFCSTDYSNLGPV     |
| Q14931 | HDASIYVCRVEVLGLGVGTGNGTRLVVEKEHPQLGAGTVLL     |
| P00642 | EGSNFLTENISITRPDGRVVNLEYNNGILNRLDRLTAANYG     |
| P37237 | IAKSNGKGDVFTTEIVLENNYTALQNAKYEGWYMAFTRKG      |
| Q3ZCH5 | YKDREGSHTFQGAFGCELRNNESSGAFWGYAYDGDQDFIKFD    |
| P31269 | AFSENNAENESGGDKPPI DPNNPAANWLHARSTRKKRCFYT    |
| O54836 | RGEPDSALEELCKPLFCKLCNVTLSAQQAQAHYQGNHNGK      |
| Q91V79 | LYHAWLAAVVI FGPLLQFHVNSRTIFASHGNFFNIKVFNSA    |
| P61296 | VKEEKRRKELNEILKSTVSSNDKKTGRTGWPQHVMWALELK     |
| Q99865 | RVLSLKILSDRVASSHISDANLANTIIGKAVEHMFEGEHGS     |
| Q9Z0G4 | AWGPCSTTCGLGIATRVSNQNRFCQLEIQRRLCLSRPCLAS     |
| P70447 | RGAKTAETVQR IKKTRRLKANNRERNRNMHNLNAALDALREV   |
| P41047 | LGMYQLFHLQKELAELEFRTNQSLKVSSFEKQIANPSTPSE     |
| Q96S96 | LVTAAALLGLMMVVTGDEDENSPCAHEALLDEDTLFCQGLE     |
| Q8C432 | EPAESQASDELECKICYNRYNLKQRKPKVLECCHRVCAKCL     |
| Q9D7J9 | SEPRLTSTRQQDGI RNI VLSNPRRRNALS LAMLKSLRS DIL |
| Q9Z132 | TPCPEGQKRRKGGQRRRENANRHPARKNSKEPRSNSRRHKG     |
| P00757 | VQSQVDCENSQPWHVAVYRFNKYQCGGVLLDRNWWLTAHC      |
| Q9NTQ9 | VMHVAYREERERKHHKHPNAPS LYDNL SKKRGGLWWTYL     |
| P22227 | GEKPYQCTFEGCGKRFSLDFNLRTHIRIHTGERRFVCPFDG     |
| Q02067 | EHDVSAAFQAGVLSPTISPNYSNDLNSMAGSPVSSYSSE       |
| Q9BW66 | RKPVLSVSARKIKDNAADWHNLI LK WETLNDAGFTTANNIA   |
| Q96LD1 | LYVKEIHSRKDSPLVLQSDRNVTVNARNHMGQLTGQLTIGA     |
| P57759 | ASSEELLVAEVGISDYGDKLNMESEKYKLDKESYPVFYLF      |
| Q61166 | LKLTVEDELEKERDFYFGKLRNIELICQENEGENDPVLQRIV    |
| Q78JT3 | RVRVKSWEENRASFP P VCNKLMHQEQLKIMFVGGPNTRK     |
| Q8N8J0 | GPRFKLLTLGLSLLHADVVPNATIRNVLREKIYSTAFDYFS     |
| P46777 | EGKTDYYARKRLVIQDKNKYNTPKYRMIVRVTNRDIICQIA     |
| Q2T9N3 | VPATVDGMLGGYGHISSIDINSSRKF LQRFLREGQNKTGTS    |
| Q05B67 | NVVPFLELIGLPDSIVNIIKNSQSGNALTAYALFKIATPAR     |
| Q9UBK7 | GTNVVKLFNDAIRLAVSYQNSQDFMDEIFQELENFSLQE       |
| Q9GZN7 | IAASGLTRMFAPALPSDLLVNVYINLNKLCCLTVYQLHALQP    |

|        |                                            |
|--------|--------------------------------------------|
| O00161 | MEENLTQVGSILGNLKDMLNIGNEIDAQNPQIKRITDKAD   |
| Q7Z7H8 | QEEIGLIRLLRREIAAVFQDNRMIAVCQNVALSAEDKLLMR  |
| Q9H825 | ASKYWDTFYKIHKNKFFKDRNWLLREFPEILPVDQKPEEKA  |
| P00484 | ERYKSDTKLFPQGVTPENHLNISALPWVNFDSFNLNVANFT  |
| Q8TAY7 | GKRALCPTCSLPLSEKERFFNYCGLERLALVEVLGAERFSPO |
| Q6ZS82 | KTTACYHHLVLTVGGSDSQNLRQELQKTRQKAQELAVSTC   |
| P11086 | FLEVNRQELGRWLQEEPGAFNWSMYSQHACLIEGKGECWQD  |
| Q9BY19 | SHFGCQLVCCQSSNVSVIYPNIYAANPVITPEPVTSPPSYS  |
| Q9CPQ5 | QLKKRLLQQCATLKVPPRKLNYLKDVSMLKMEKAQERANE   |
| P09632 | RIEVSHALGLTERQVKIWFQNRMRKWKKENNKDKFPSSKCE  |
| P05231 | RKETCNKSNMCESSKEALAENNLNLPKMAEKDGCFOQSGFNE |
| Q9WV68 | AAKAAVDAMTRHLAVEWGPQNIRVNSLAPGAIISGTEGLRRL |
| Q8VCR7 | APGSQLRGFVVPVAPICTDKINAVDYASVKTPALIVYGDQDP |
| P01921 | RWFRNGQEETVGVSTQLIRNGDWTQVLVMLEMTPHQGEV    |
| P59279 | EAFAREHGLIFMETSAKTACNVEEAYINTAKEIYRKIQQGL  |
| Q9R0M5 | IPVGQPCNQVTTTGLKWNLTNDVLGFGTLVSTSNYDGSGL   |
| Q3MHX1 | RLHCTQDPVPEAVGGDMQQLNQLSAQQFSALTEVLFHFLTE  |
| Q8BZI6 | QGHFIVLRGYNRATGCIFYNNPAYADRCMSTSIISNFEEART |
| Q9TR36 | PCSVQEYQVQGLYSVAEASKNETGGGEGIEVLKNEPYEKDG  |
| Q9DCX1 | KEFYELDLRLAPFGVDQGLNTAACLRRLFRAIPLADPFSE   |
| O55100 | FWFVGFCLANQWQVSKPKDNPLNEGTDAAARAAIAFSFFSI  |
| Q9UPY8 | LLARQGQDVAPPPNPGDQIFNKSKKLIGTAVPQRTSPTGPK  |
| Q96A25 | REDENKSI LSSKPAIGSKAVNYSSTGSSKSFCSCVPCEGTA |
| P04975 | EKAKKDLEEWNRQSEQVEKNKINNRIADKAFYQQPDADI I  |
| P63158 | GEHPGLSIGDVAKKLGEMWNNTAADDKQPYEKKAAKLKEKY  |
| Q5TAG4 | RGRRSKKRRRRGRKEGEDQNPCCPRLNSVLMEVEEPEVLQ   |
| Q15006 | ELYDVTWEEMRDKMRKWREENS RNSEQIVEVGEELINEYAS |
| Q9H898 | ASPYQRRSDRYCGLCAAWFNPLMAQQHYDGGKHKHKNNAAR  |
| Q75VT8 | AVLFSGLVAITVLRKAKAKNLQKQRERESCWAQINFNTND   |
| Q9CPS7 | ENWMKI FTPIVEHLGLQIRFNLSRNVEIRTCKD TKDVSAL |
| Q3T0S3 | LKCCGFTNYTDFEGSPYVRKNGTFPPYCCYDSVNNSFMPEPC |
| O75792 | NSLSHDTATGLIQYALDQGVNVTQVFVDTVGMPETYQARLQ  |
| O75845 | IYPFIFPLHKVVYLSLYILVNIWTIS IHDGDFRVPQILQPF |
| Q9D819 | HDYWKALVTKKTDGKGISCMNTTVSESPFKCDPDAAKAIVD  |
| Q5E9C8 | IEDTLCPFGFEVYPFQVAWYNALLPPAFHLPLPGPTLAFV   |
| Q9BRV3 | TSASWCLYGFRLRDPYIMVSNFPGIVTSFIRFWLFWKYPQE  |
| O15144 | VNNRIIEETLALKFENAAAGNKPEAVEVTFADFVGLYHIS   |
| Q9CY50 | LVINLNYKDLNGNVFQDAVFNQTVTVIEREDGLDGETIFMY  |
| O00299 | EEQPQVELFVKAGSDGAKIGNCFFSQRLFMVLWLKGVTFNV  |
| Q9Y2Q3 | SPYSWLGFEILCRYQNIWNINLQLRPSLITGIMKDSGNKPP  |
| Q8K2H2 | PIEILQADAPPIIVGEEYPRNPLVLVYMRHAYGLGEHYNSV  |



|        |                                             |
|--------|---------------------------------------------|
| Q3UBG2 | YCTADHNVSPNIFAWVYREINDDLSYQMDCHAVQCESKLEA   |
| Q645M6 | ARHLGVSVDVKEAIEEKYPRNLAEQVRELLRVWKNSTRENA   |
| Q9D9J8 | WFSANITLFDIEFKLPFNSNIKTHACMGLTAESWLEKDE     |
| Q9JIW9 | RGKAEWGVQYVETSATKTRANVDKVFDFLDMREIRAKKMSEN  |
| P41047 | ELREFTNQSLKVSSFQKQIANPSTPSEKKEPRVAHLTGNP    |
| P46926 | KLIILEHYSQASEWAAKYIRNRIOQFNPGPEKYFTLGLPTG   |
| Q5JBG6 | KNATCYLGYLKKGIYYQGCFNNGKTASFRLIQICNMMTMA    |
| Q80UW2 | YSGRTDAGSLYELTVRLLSENEVDLAEFATGQVAVPEDGSW   |
| Q6P3D7 | IRRKLTYPQSEAVLQRLAPANYLGKDLFPQYQPDQGYLS     |
| Q0V7M7 | IVVNELLNKLELEIQYQEQTNSSELKELFESLEEDYKDVHL   |
| Q6UX82 | TSCISSASSSLETVPVRLYQNMFCSAENCSEETHITAFVTH   |
| Q9DBD2 | KTKDKEQNEKTLGHSMSPSNISKAGSSPSTTAPVSAFSR     |
| Q14CZ0 | GKVPPPRNSRAPRLTVVSPNRATSTETSSSVETDLQPFRE    |
| O00194 | ENPDIVLIGNKADLPDQREVNERQARELADKYGIPYFETSA   |
| Q14002 | EEVTRQFYVVFSEPPKPSITSNFNPNVENKDIVVLTCPETQ   |
| Q9D8C2 | TASARNDIQRNLCCGFRSYNPDTCASCSTKQKSSCA        |
| Q9D9J2 | NDKEGQQDMNSFRANHSSLDNSKFKYHARLSQSPLGSSLGQ   |
| Q6NZQ8 | VEMYVQCKVYVQLWRRLKAYNRVIFVQNCPTANKLEKNFP    |
| P80217 | PLVFRGHTQQDPEVPKSLVSNLRIHCPLLAGSALITFDDPK   |
| Q16635 | FILEKLNHGDWVHIFPEGKVNMSSEFLRFKWGIGRLIAECH   |
| Q8WZ82 | EPAVCRGLEESLGMVAQALNRLGPFDDLGFSSQGAALAL     |
| Q8BHH2 | KVDKEDRQVTTTEEAQAWCMENGNYPYLETSAKDDTNTVAF   |
| Q3SZ21 | FELLYSPAIKDSTMRRYTISNALNMQVCKGKNVISSAAE     |
| P11049 | AQLERSLRDVVEKTIQKYGTNPEETAEEESWDYVQQLRCC    |
| P09936 | EELKGQEVSPKVYFMKQTIQNSCGTIGLIHAVANNQDKLGF   |
| Q5E9C0 | NTLPRGFGSLPALEVLDTYNNLNENSLPGNFFYLTLRAL     |
| P48758 | AYGVTKIGVTVLSRILARKLNEQRRGDKILLNACCPGWVRT   |
| A2VE58 | QTLRVASWVFSIAVFGPIVNEGYVNADSGPELRCVFNAGNA   |
| A3KMZ6 | QQTEIYVVPGETALAFYKAKNPTDKPVIGISTYNNVVPFEAG  |
| Q5EA33 | DVHAVTVDGWTFPLHSACKWNNARVASFLLQHDADVNAQTKG  |
| Q3ZCB8 | GIELLTLASWSSASWYFLNVFGLRSIYSLILGQDNAADQ     |
| Q08E43 | YLSERLIRTIAAIRSFPHDNVEDLIRGGADVNCHTGLKP     |
| P17861 | IQSLISCWAFWTTWTQSCSSNALPQSLPAWRSSQRSTQKDP   |
| Q5E9C0 | HNKLTTPPNIAELKNLEVLNFFNNQIEELPTQISSLQKLK    |
| Q9D7S0 | TTVGEFVFKSVECTQPTTEYTNSTTTIPPIITNTSLTSVTRPG |
| Q96BX8 | QLPPGEDLNDWAVHVVDFFNRVNLIIYGTISDGCTEQSCPV   |
| P00921 | LALVYGEATSRRMVNNGHFSFNVEYDSDQKAVLKDGPLTGT   |
| Q9CY24 | CSEAQKTSWTPSGTAVQFYSNLHTAETSSWVNLILWCLALL   |
| O08992 | SSAARNGLLTDHHICEINGQNVIGLKDAQIADILSTAGTVV   |
| P70377 | YLYTSEHFTPECKFKESVFENYYVTYSSMIYRQQQSGRGWY   |
| Q32KZ1 | IHAKAFSTEDTQDEMTKKKKNETAFSSVGRKINERIIHVLD   |

|        |                                                 |
|--------|-------------------------------------------------|
| P39942 | PSRMAQTIMKARLKGQGTGRNLLKKKSDALTLRFRQILKKI       |
| P05831 | ISSEKGFYQVPLCLRKSLSNLREYQNRDIARSKAVLG           |
| Q0VC18 | SLLYRLKFKFVQSIPTKGFNTEKIRVPLGGSRGITFQVWD        |
| Q9CQ52 | LVALASGCGQPSHNPSSRVVNGEEAVPHSWPQVSLQYEKD        |
| Q91ZX1 | ATACHNVGAQLVVIKSDEEQNFLOQTSKRGYTWMLIDMS         |
| Q9BS40 | STEDTWYKMKIQTVKQVQRNDDFIELDYTI LLHNIASQEI       |
| Q9MZ13 | SGVEFSTSGHAYTDTGKASGNLETKYKICNYGLTFTQKWNT       |
| Q99M71 | TWIGVYTAKDCYPVQETFIRNYTVVMSTRFFDVQLGIKDP        |
| P05402 | SEKLQAFIERQFSKIIVPVLNTMIQARSSWTGLPSLMSSDE       |
| Q9Z2F7 | PPPAGLNSSWVELPMNSSNGNENGNKNGGLEHVPSSSSIH        |
| P19473 | PNFLVSI PVNPKQMEC RCENADEEVAMEEEEEEEEEEEE       |
| A4D1S5 | RSTFESIPHWIHEIEKYGAANVIMLIGNKCDLWEKRHVLF        |
| P48739 | KDDFFIKIETWHKPDGLGTLENVHGLDPNTWKTVEIVHDIA       |
| Q9UL40 | QFVGREVEHMIQKNQCLFTNTQCKVCCALLISESQKLAHY        |
| Q9UGN4 | PPQIFLCKIVETKGSAGKRN GRVSIRDSPANLSFTVTLEN       |
| O70401 | FRHEIKNSFKSNYENALKEYNSTGDYRSEAVDKIQSTLHCC       |
| Q8R218 | ATAGIWI VFAIAVVNGSVDLNEGFPFISICGSYAPQSCIFG      |
| Q8NBQ5 | DIYSSAKVKAEIGDVSILVNNAGVVYTSDFATQDPQIEK         |
| Q0V7M8 | SGEEEPSLLRTRALRPHPPPNGRANQDDGHPPPTGKLEGFES      |
| Q9HBU1 | RIDLAE SLGSLQLQVKTWYQNRMKWKKIVLQGGLESPTK        |
| Q99627 | PVAVMAESAFSFKLLDQCENQELEAPGGIATPPVYQQLLA        |
| Q32KY8 | DILLSDYIAFVEKSGCHLEVNFNLEFTEICVNTILYWFAR        |
| P18111 | EKEFHYSRYITIRRKSELANLGLTERQVKIWFQNRRAKER        |
| Q9EQI8 | WEQAF LQFRPGARETEADKKNDR TSLHRKLD RNLVLLVREK    |
| P04393 | ISKGN YTF LQC SF EKTIGMVNRDDV VYCDPPYIGRHVDYFN  |
| Q91V79 | PAGAPLRLVFLNLVLLGLWNFLLLCTVIYFHQYTHKVGA         |
| P35282 | FLDLCKRMIETAQVDERAKNGSSQAGAARRGVQIIDDEPQ        |
| Q0P5B4 | KQHTVICSEHFRPECFSAFGNRKLNKHN AVPTVFAFGPPQ       |
| Q29RR0 | ANGPRPVRPGTARPGPEAPPNGPPQPRSSVGGGDFYDVA         |
| Q9H2W1 | LSVKQATLNPASLQCELDKNNIPTRSYVSYFYHDSLYTTDC       |
| Q8NCR6 | KCSPNYLGS DWYNTWRMEPYNSSCCNKYTYLPRLPKEARM       |
| O70584 | PGLLRVVV PVLVHDRPPSNNGRGEGETSAVPQDKCSARLAT      |
| Q96E22 | DCKYSPEFANSNDKDDQVLNCHLAVKVLSPEDGKADIVRA        |
| Q924T2 | LHTLNNVFEPHVAVRDAAKMNIPTVGIVDTNCNPLITYPI        |
| P63073 | EPETPTTNPPAEEEKTESNQEVANPEHYIKHPLQNRWAL         |
| Q8BPA8 | VGEPVPSGAGSLGSELIKESNANPIFMRKDTKTSFQWRIRN       |
| P12246 | LTPQDILFVYRDSPVNPNILNWQALNYEINGYVVIRPRVWD       |
| Q9Z1L2 | IFGGVFSLVIFSSLLTDGYQNRTE SPQLRCLVNSNHMACSF      |
| Q9D819 | VKKGKLRVANLFPYKGYIWNYGAIPTWEDPGHSDKHTGC         |
| Q8CCI5 | TRSSSTSSSTVTSSAGSEQQNQSSSGSESTDKGSSRSSTPK       |
| Q9NYP7 | WYFYSKLI EFM DTF FFI LRKNNHQITV LHVYH HASMLNIWW |

|        |                                            |
|--------|--------------------------------------------|
| Q32LM7 | KLINDFSQIEKKMIESSGKNNILDMQLEKANCLLRVMQTKE  |
| Q9DBU2 | PYYYSIRGVKLDGFTYVLYINGGHPWTILDYIQHLGSALA   |
| Q00724 | EDPAKFKMKYWGVASFLQRGNDDHWIIDTDYDTFALQYSCR  |
| Q96PM5 | RYWRQLDDEVAQTMPSEYQNMVDILCNDNCRSTVQFHI     |
| Q96G30 | TKTGAPHQDNAESSEKFRMNSFVSDFRPLEPDKVFSRQG    |
| Q0VCV7 | VARISVKAPTVEAAAAPGSENVAVLTRGSRHLKMKTEEFPT  |
| P07743 | SAVNNLKI LNPPSEAVPQNLNLDVELLQATSWPLAKNSIL  |
| P25402 | SLSLAINNRVKLIYRPIALKNGRDEAENNIK LINSGTDSCL |
| Q9BSU3 | HRRLGLAQKLMQASRAMIENFNAYVSLHVRKSNRPALHL    |
| O08542 | VDWSGYEACTAEGANAFQRWNCMPFAPFSPVRFSEKIQRY   |
| Q8N6G2 | KNCLPWKIPASMKEVNKALSNQFISLTKRDFVDRSKAQKIK  |
| P11672 | VQKKEGSFTMYSTIYELQENNSYNVTSILVRDQDQGCYRW   |
| Q6P2H8 | ASAELDYTIEIPDQPCWSQKNSPSPGGKEAETRQPVVILLG  |
| Q53R12 | SNDTMASGWRASSFHFDSEENKHLIHFSVFLGLLLVGILE   |
| P48507 | AAKALLARARTLHLQTNLLNWGRLRKKCPSTHSEELHDCI   |
| P13349 | DVSNVYATDKNSLSSLDCLSNIVDRITSSEQPGLPLQDLAS  |
| O09172 | LVREFPDVLECTMSHAVEKINPDEREEMKVSAKLFI VGSNS |
| Q969M3 | QPFYGNFEDEPPLLEELGINFDHIWQKTLTVLHPLKVADG   |
| Q8N3J9 | GEKVYKDCDCGKDFSTTKLNRHKKIHTVEKPYKCYECGKA   |
| P12319 | WDVYKVIYYKGEALKYWYENHNISITNATVEDSGTYICTG   |
| Q8BH95 | IQLNRPKALNALCNGLIEELNQALETFEQDPAVGAIVLTGG  |
| P41227 | SRAMIENFNAYVSLHVRKSNRAALHLYSNTLNFQISEVEP   |
| P25732 | PFVANANFMIYPI SKDLKNGNSELVRVYSKSKEIQYIKIYT |
| P0CI32 | SLVNTPAETLETGFHELFNVNVLGYLLGAKACAPALIASSEG |
| Q5SS90 | WQREAELEENVKRVKLPAINSKNPSKGTVPVSHKEPERSR   |
| Q8MJ50 | YVAEQAESIDNPLHEAAKRNLSWLRECLDNRVGVNGLDKA   |
| Q3KNV8 | IRCSAQATVLHLKKFIAKKNLSSFNELDILCNEEILGKDH   |
| Q96D70 | ALASSQVKRLSASRRQHFINQAVRNSDLVPKAKGRKSLQR   |
| Q80X71 | SYDAEKRTIYLNITNTLNTNANNYSVEVENITAQVQFSKT   |
| Q9NRE1 | TSISPGRCCKWNKHTLTYRIINYPHDMKPSAVKDSIYNVSI  |
| P12979 | EILRSIQYIERLQALLSSLNQEERDLRYRGGGGPQPMVPS   |
| P20290 | KLQFSLKKGVNNSIGIEEVMFTNQGTVIHFNNPKVQASL    |
| Q8VCD6 | RDKSYETMMRVGKRGLNLAANAAVTAAAKGQVLSKLRSF    |
| Q91WR8 | QKSKVDCNKGVGTGVYEGANTIDGGEFVNFQQYAGKHILF   |
| Q15907 | DLRHLRAVPTDEARAFAEKNNLSFIETSALDSTNVEEAFKN  |
| Q9Z1L2 | AFCFLASQWHKSKHFLGNSSAKAAIALSFFSVPVWILQ     |
| P20489 | ADMVLVHGSFDIRCHGWKNWNVRKVIYRNDHAFNYSYESP   |
| Q5KR49 | AELSEGKCAELEELKTVTNNLKSLEAQAEKYSQKEDKYEE   |
| Q1RML4 | KGGKGRKKLRLFEYLHESLCNPEMASCIQWIDQTKGIFQFV  |
| P15946 | VGGFNCEKNSQFHWVAVYRYNKYICGGVLLDRNWWLTAABC  |
| Q9CY28 | VRLDHAPSLQQPEVCFIGRSNVGKSSLIKALFSLAPDVEVR  |

|        |                                             |
|--------|---------------------------------------------|
| Q5VZV1 | QVTATDLPDVLGNLQYNLLKNTLQCTAHLPEVKELVWGEDL   |
| Q969F1 | QIKDNDFSYPNMCNLFHENEDEEVVASAPDKSLELEEEE     |
| O35949 | MVITSLQILQMVLGTIFGILNYIWRQEKGCHTTTEHFFWFSF  |
| A2VDN0 | TRMELEEDVKIYLEENYERINVPVQFGGGDPADI IHDFQR   |
| P10300 | AALWSSSALIQTSSLLVQTNHTAKMSCEVKSSISKLTSIYW   |
| Q8R1Q0 | ETSITKAQLSEIEQRHKELVNLENQVKDLRDLFIQISLLVE   |
| Q9Z210 | KRAVHLSDVVLRFCITVSHLNRYFACDNVLWAGKSGLAP     |
| P62079 | LGITFLGIGLWAWNEKGVLSNISSITDLGGFDPVWFLVVG    |
| Q9UIY3 | RLFHSFEELLLAHDYGLRNDYHMNLGQFLEFLKHKHSEH     |
| Q9UQN3 | ALEKQEKQLELEIKKMAKIGNKEACKVLAKQLVHLRKQKTR   |
| Q9D172 | GFGAAKNLSTFAVDGKDCCKVNKEVERVLKKEFHGAKKPIGLC |
| Q9DA17 | LDDPTFKGQWFRFSTDNDFNIEGKYSEIYALRKQKMYPN     |
| P51858 | KFGKPNKRKGFSEGLWEIENNPVKASGYQSSQKKSVEEP     |
| Q8IWT1 | FRWTYNSSDAFKILIEGTVKNEKSDPKVTLKDDDRITLVGS   |
| A6H7F9 | IQNQTVAILQCLGSGSKVKVNLVHSEKRQKVHILKNLRVM    |
| Q2KIS7 | ALYEYLRQSVGSEAEVWLGFNDASEGSWVDMTGGHIAKYN    |
| Q9BQB4 | CLLVHTAFRVVEGQGWQAFKNDATEIIPELGEYEPPEPELE   |
| P01881 | WEPKSSIVEHVFPSEMRNGNYTMVLQVTVLASELNLNHTC    |
| Q6UXB4 | DASAHLVIVGGLDEQGFLTRNTRGRGYWGLRAVRHLGKVQ    |
| Q9DB05 | IAHYEQSADYYKGEESNSSANKCLLKVAGYAAQLEQYQKAI   |
| P50914 | RKAKMTDFDRFKVMKAKKMRNRIKNEVKKLQKAALLKASP    |
| Q3U1C6 | EFIAQVKGISVEEVREVTTRNAFRLFPKQLQSLQKELQSHF   |
| Q3T0B6 | NGTEAKLVRKVAGEKITVTFNINNSIPPAFGGEEEPSPQGO   |
| Q2HXU8 | IHTSDHRCNCPKMWQWYQNSCYFTTNEEKTWANSRKDC      |
| P05305 | WNFCQAGKELRAEDIMEKDWNNHKKGKDCSKLGGKCIYQQL   |
| Q32L50 | WMQYLREGYTVCVDCQPPAMNSVSLRCSGDGLDSDGNQTLH   |
| P63075 | TSGKHVQVTGRRISATAEDGNKFAKLIVETDTFGSRVRIKG   |
| Q2PT27 | TNLSYANFSKVVLEKCELVENRWMGTQVLGATFSGSDLGG    |
| Q5EA91 | LTFGVEVGFKFATKTVIYLLNPCHLVTMHLPFELEIYYIQ    |
| Q61335 | GAAEDGDKLDIGNTEMKLEENKSLKNDLRKLDKDELASTKKK  |
| Q925K9 | YKGTVAIKVVDRRRAPPDFVNKFLPRELSILRGVRHPHIVH   |
| Q9D7L8 | DQTVSVTVVLNVTFPPLLSGNGFQTVVEENS DVSLVCNVKSN |
| Q9CY57 | GRGRGRGALTRFVLTKEQLDNQLDAYMSKTKGHLDAELDAY   |
| O76080 | NPRTNMCSVCYKEHLQRQNSGRMSPMGTASGSNSPTSDDS    |
| Q9UKI2 | IHIGKEGQHDVFGDISFLQGNIELLPGNQEKAHLGQFPGHN   |
| P13600 | TTATDIKGEVMVLGEVNISSVFKQYFFETKCRDPNPVDS     |
| Q99LS3 | QVFLISGGFRSIVEHVAAKLNIPTTNVFNRLKIFYFNGEYA   |
| A6QNP3 | SLPEKIQSYERMEFAVCYECNGQTYWDSNKGKNYRIIRAEL   |
| Q9BS16 | NIQESSVNLITLHEMLEILINRLFDVPHDPYVKISDSFWPP   |
| Q9HAN9 | LKVLRRHQEKLEASDCDHQNSPTLERPGRKRKTETQDSS     |
| O60636 | AFIGKGVAIRHVQTMYYEAYNDYLDKDRGKNGTLITFHSTF   |

|        |                                            |
|--------|--------------------------------------------|
| Q8WVD3 | CVSLPWGDPSQITRNFVSHLNQRHQFDYGEFVNLQLDEETQ  |
| Q4JM65 | YKQVKTWFQNRMKCKWKQKNWPRNSNGMPQGPAMAEYPG    |
| A1YIY0 | APSGRAASLLASVKAEWSTKNYSCEAKNNISREISELKKFP  |
| Q99P51 | FVLRHEHEIGWEAFSLPELQNFRLRLDKEEDEQLQSLKRRY  |
| P23184 | AREQWKCDGVFVSHIIDIKDNNINVDSTLIWLHLENYHSD   |
| O95292 | SLEPQHELKFRGPFPTDVVTTNLKLGNPTRNVCFKVKTTAP  |
| Q9ET26 | SVVCPICASMPWGDPSYRSANFMEHIQRRHRFSYDTFVDYD  |
| P57729 | LVIGDLGVGKTSIIKRYVHQNFSSHYRATIGVDFALKVLHW  |
| Q8C552 | TNDMIILQTLHWRMQLSTEVENRPLGQRARLREPIAQDQP   |
| Q62231 | HLHKNESVLKAKAVVAFHRGNFRELYKILES HQFSPHNHPK |
| Q9BZG1 | KCIASTYYRGAQAIIVFNLDVASLEHTKQWLADALKEND    |
| Q96S90 | DTLAGLALKYGVMEQIKRANRLYTNDISFLKKTLYIPILT   |
| P58321 | IKSQGDVTSVYFMKQTI SNACGTIGTIGLIHAIANNKDK   |
| Q9QZE7 | GPYEVSKKLYTLKQSLAKVENACYALKVRGSEIPKHMLADV  |
| Q9JHS9 | QKAEERIRMENTILSGNPLLNLTGPSQPQANFKVKRRWDDD  |
| O75431 | SDGLEEVQKAEKAYMELVNNMLLTAELYLQWCDEATVGEI   |
| P15319 | LDRTRAVFDGSEKSMTLDISNDNKQLPYLAQAWIENENQEK  |
| Q64329 | HHNCSNMQRANLKEEMLTNKSIDCRPSNETLEYIKREQD    |
| Q9Y508 | IMEGVKATIKDASLQPRNVPNRYTFPCPYCKEKNFDQEGLV  |
| P50294 | IRREQYVPNEEFVNSDLLEKNKYRKIYSFTLEPRVIEDFEY  |
| Q3T013 | GEQSLPPPAGLNSWVELPMNSSNGNDNGKNGGLEHVPS     |
| Q6ZRN7 | GSPRAAQGLGFRGSGQRARHNSFTSPSPPGAHHPLGTHTRA  |
| Q9BQY4 | QYMTSLLS PAVDDEKELQDMNAMVLSLTEEVEKEEEDAQPE |
| Q12846 | MRKTQHGVLSQQFVELINKCNSMQSEYREKNVERIRRQLKI  |
| P61085 | SLQALLAAEPDDPQDAVVANQYKQNPMEFKQTARLWAHVY   |
| Q8R138 | HEEGLDTSHLQADILAATQNLRS PARALPGNGEGAKPVKG  |
| A6NMN3 | DLECCQLQELREPPDWLVTTNYGVRCAVCCRVLPSLDALLE  |
| P03039 | TRRLAERLGVQPALYWHFKNKRALLDALAEAMLTINHHTS   |
| Q91VR2 | TIATAETMSIYDDIDADVLQNYQEYNLANLIYYSLKESTTS  |
| Q96G30 | DKVFSRQGNESRSLFHCYINEVERLDRAKACHQTTALDSD   |
| Q9D176 | NGGPGSGGGKPGIQHSQAHDNHSFTTDPGDIREQAGVTHSV  |
| P10284 | CKEPVVYPWMRKVHVSTVNPNYAGGEPKRSRTAYTRQQVLE  |
| Q9Y3Y2 | MQQQQQLASARNRRLAQQMNFRPSVQAALKLKQSLKQRLGK  |
| Q9BQI9 | VNCKCQDQLLRVAVDTGTQYNRISAGCLSRGLGKRVLKAS   |
| Q96GG9 | NPGQKGLDLEMAIAYWNLVNLGRFKFLDLWNKFLLEHHKRS  |
| Q8VEN2 | SPVGTWSGTYEKCNDSSVYNYLTSQSQSVFQTNWTVPTSED  |
| A2ADA5 | ALNTHLKHPAIRVLKAFRVPNDFHARHAATSRTYQYRLATG  |
| Q9D7Z7 | VQCHQDQSACFQGNRMNIGNFSVPVYIRTCHRPSCCTMTGT  |
| Q9BTT0 | LSSLARLPSLNKRLKLELSDNIISSGGLVLAEKCPNLTLYLN |
| Q765P1 | SSLFSLIAGIFLCFSCSPQGNRSNYDAYQAQPLATRSSPR   |
| Q80UU9 | ATFCLDKDALRDEYDDLSDLNAVQMESVREWEMQFKEKYDY  |

|        |                                             |
|--------|---------------------------------------------|
| Q15072 | FKCSECGTAFGQKKYLKHKQNIHTGEKPYECNECGKAFSQR   |
| Q7M757 | SQMSAVCGPLLQWLEDRLEQNQQRLQELEQEKEKDLMEELSS  |
| P31240 | NANFLVWPPFCVEVQRCSGCCNNRNVOQCRASQVQMRPVQVRK |
| Q8K422 | WAGVIALFCRQYDI IKDNEPNNNEKTKSASETSTPEHGGG   |
| Q6UWY2 | EELPPGLMEAKVRVLDPDVCNSSWKGHLLTLMCLTRSGDSH   |
| P17026 | HLRQHMKVHKEEKPRKTRGKNIRVKTHLPSWKAGTGRKSVA   |
| Q96KX2 | VVLLCALKLYVNDHYPKGCNMLRKTVKSKEYLIACIEDHN    |
| Q8C996 | VLKFM LGKVLTSRALITDGFNSLVGGVMGFSILLSAEVFKH  |
| Q32L09 | SSGSTVATCLSQQGLEDLDNLILEDLKEEEEEEEEEEEG     |
| Q96HF1 | PIPANLQLCHGIEYQNMRLPNLLGHETMKEVLEQAGAWIPL   |
| Q96E40 | YKLFQQQQLTFTAALHCRENAHDKIRPISSIGQVQSYMEH    |
| Q9UHW5 | IDDYSMVRFLPYDQSDEESMNIVLQHIQYGEDLEFKE       |
| F1MIW6 | ATRPKEGKETEQAQAHVPSVVNLTSTCCPEVAKSYGHKLLT   |
| Q9UMY1 | AAQAFIHNSLYGPGTNRRTVNKFLSLANKRFPVKRAAVQFL   |
| Q29438 | PCNFCNFCNFCSPCSPCNFCNFCSPCSPCSPCNPCDPCNPC   |
| Q68CL5 | RHMISSEWQKNNCVMPELVKNFYMTNGFHM TWSVKLDEHI   |
| Q6NZA9 | DQSFTSPPPRDFLLDIARQKNQTPPLIKPYAGPRLPPDRY    |
| O60479 | PYSASPSYLDDPTNSWYHAQNLSGPHLQQPPQPATLHHAS    |
| O89051 | ISVPVPEFADSDPANIVHDFNKKLTAYLDLNLDKCYVIPLN   |
| Q9CPR5 | AKINIEVQLASELAAAEKNGGVVTTAFYDPRSLEILCKP     |
| Q9CY24 | FLCGALAAATLTRTQGSFGNCPLYGVAALNGSS LALLGPS   |
| Q8C7B6 | QRSICSQHESLVNDFLLQVCNRCPNLTSVTLSGCGHVTDDC   |
| P49771 | VKIRELSDYLLQDYVPTVASNLQDEELCGGLWRLVLAQRWM   |
| P04394 | YPEGHAAAALPVLDLAQRQNGWLPISAMNKVAEILQVPPM    |
| P62424 | IRLQRQRALYKRLKVPAINQFTQALDRQTATQLLKLAKH     |
| Q01730 | HNKLTTPPNVAELKNLEVLNFFNNQIEELPTQISSLQKLK    |
| Q14197 | TPKEPTKEDVKLHRIRIENMNRERLRQKRIHSAVKTSTRVD   |
| Q08DY6 | RRRCRDPINVEGLLPSKIRINLEDNVQVSMRKALKVKRPR    |
| Q0IIL5 | SNALLVQLPELPSKNLFFNMNQRHVDQRRQGLEDFLRKVL    |
| P70689 | LCYLLKLKCFRRSKRTQAQRNHPNHALKESKQNMENELISD   |
| P56597 | VAKETHPDSLRAIYGTDDL RNALHGSNDFAAAEREIRFMFP  |
| Q29RR0 | FKDGAF LAGTFISTVGI DFRNKVVDVDGMKVQLIWDTAGQ  |
| Q3SZC1 | LCTAAKQKNNQNL EEDAGQNEQKTDLPSTEKTLMEEKVKL   |
| Q99KJ0 | TEQKKQVDVNIKLWKNGFVTVNDDFRSYSDGASQQFLNSIKK  |
| Q8IU54 | ALEESLKLKNWSCSSPVFPGNWDLRLLQVRERPVAEAELA    |
| Q60898 | QKTFDWKRVSR LQEGSEGAENPLRVDESLSYGLRESIASY   |
| P30412 | TFPDENFKLKH YIGWVSMANAGPDTNGSQFFITLTKPTWL   |
| Q96ND0 | NVVPFLELIGLPDSVVSI LKNSQSGNAL TAYALFKIATPAR |
| A6NDR6 | VNNWF INARRRIVQPMIDQSNRTGQGAAFSPGQP IGGYTE  |
| A1YQ93 | QGPFNSWFPFPGILQQQQNQVPLSPFSLSTREWFAGLV      |
| P41731 | LDK LQKENNCCGASNYTDWENIPGMAKDRVPDSCCINI TVG |

|        |                                              |
|--------|----------------------------------------------|
| Q8BHC1 | YRNSVGGLLFDITNRRSFQNVHEWLEETKVHVQPYQIVFV     |
| Q5VXT5 | FAFGSCGYSYSGETGAMVRCNNEAKDVSSIIVAFGYPFRLHR   |
| Q2HXU8 | WEDGSVPSFSLFSTKELDQINGSKGCAYFQKGNIIYISRCSA   |
| A6NJI9 | LHGITFLTRNYCLTELYLNNNAIFEIEGLHYLPSLHILLH     |
| P61006 | IEEHASADVEKMILGNKCDVNDKRQVSKERGEKLALDYGIK    |
| P04095 | EFEKHYSNVSGLRDKSPMRCNTSFLPTPENKEQARLTHYSA    |
| Q9NQ48 | DLSNLENTVAALKSEFQKTLNDKTENQKSLEENLATAKHDL    |
| Q8N8R7 | HVKIYIDRFEDLQKSCDDPFNIHKKLAKKNLHVIDLDDATF    |
| Q92520 | ARRLIADLGSTSITNLGFRDNWVFCGGKIKTKSPFEQHIK     |
| Q2KHU0 | DGATDMEACPPADAFIGFGGNVIRQQVKDNAEWYITDFVEL    |
| Q9DBJ6 | APPQIYHEKQRRELCALHALNNVFQDSNAFTRETLOEIFQR    |
| Q925G2 | LNAVAAILAIISVVAVFEYHNVQKVPHMYSLHSWGLTALI     |
| P25393 | KEMIKINNIMHKYTVLYTSNCIMDIYSEEEKITCFNSRLV     |
| Q8VHN8 | VLGLVRVPLYTQKDRVGGFPNFLSNAFVSTAKYQLLFALKV    |
| BIATL7 | RGPSHIPTLRSGIVMEVPPGNTRACRGLAHVSPFLRGPC      |
| P10966 | GEEVEQEKIIVFRDASRFILNLTSVKPEDSGIYFCMIVGSP    |
| P62826 | YIQAQCAIIMFDVTSRVTYKNVNPWHRDLVRVCENIPIVLC    |
| Q99M71 | QAPQQWEGRQVLYQQSSGHNNRALVSYDGLNQRVRLDERK     |
| Q86UF1 | ASGEEFSFVSPLVKYLLFFNNMLFWVISMVMVAVGVYARLM    |
| P61588 | DSQCGKTALLHVFAKDCFENYVPTVFENYASFEIDTQRI      |
| Q8BIX3 | EDLQKSCDDPFNIHKKLAKKNLHVIDLDDATFLSAKFRQL     |
| Q8BJK1 | RAVHKEAQYYAIGPLLEQLENMQPLKGEKVRQAFGLMPYY     |
| Q9P1T7 | AQVPSGEEIGKIKNGHTGLSNGNGIHHGAKHGSADNRKLSA    |
| A6NGY1 | QENCRKRKISSKIDICQDRAGNCPPEECNLTLNKKSRSSTAV   |
| P25393 | SKVDTNDCRGMRSRKIMTTEVNKTLLELDELKNINSHDSDAFIS |
| P05833 | LVISDVLFNGTTEEKQKPLTVNELNTIQPVAFMRLGLFVPKP   |
| P18121 | KAADIKGRNLVILEGLQTIYNRSQANIEENENFDYPAWSSL    |
| P28067 | GKPNTLVCFVSNLFPMLTVNWHDSVPEVEGFGPTFVSAVD     |
| Q15040 | KLPLKRQHWICREVGGAYYNLDSKLMPEWIGGESELRFK      |
| Q8VCH9 | NLKEIPRDLPPETVLLYLDNQITSIPNEIFKDLHQRLVLN     |
| P04187 | EVELTVQKDRECESYFKNRYNKTNIQICAGDPKTKRASFRGD   |
| Q9D3G5 | MSGEQIEDMFEQGWDFSENLLADLKGARAALNEIESRHR      |
| Q0VC80 | HAFMQDLAQMFGGPLALTSANLSSQSSSLNVEEFQDLWPHL    |
| Q8WUK0 | LGVEQLRLSTVDMTGIPITLDNLQKGVQFALKYQSLGQCVYV   |
| Q9CRA5 | TWNPLKLHYQLRNVRELERLAKNLVEKGLTTEKQNFLLFDMT   |
| P0CG29 | WVQVLGPLIGVQVPKEKVERNRTAMDQALQWLEDKFLGDRP    |
| Q3V2Q8 | PNLLEEAEHWNQRRARKAMRNGISPIIIDNTNLHAWEMKPY    |
| Q9D176 | TLRGRARPRWRAGNTTVPVFNQTGTCAQLHPPQGTQVVR      |
| P0A1V9 | GVNRGFAGHNQDQDLRSAMRNSTVWVYELFAKEIGDDKARR    |
| Q9H9H4 | VQKMEETQNVQLNKEMTLASNRSLAEGNLLYQPQLDTLKAR    |
| Q9UL40 | THAKNLKQKQSTKVEALHQNREMIDPDKFCSLCHATFNDF     |

|        |                                             |
|--------|---------------------------------------------|
| Q08E62 | LVLRLDSRLWPKIQGLFSSANSFPVPGFSQSLTLSTGFRVI   |
| Q61754 | LTAACHYGNATSQYNVWLGKNKLFQREPSAQHRWVSKSFPH   |
| Q3LI83 | LSSSDLSPFTFGHCLPSSYQGNLWLLDYCQESYGEAPTCKSP  |
| Q15102 | ERQPQARVVVLGLLPRGQHPNPLREKNRQVNELVRAALAGH   |
| Q8C8M1 | SGNRMKSNQISKLQKEFKRHNSDAHSTSSASPAQSPCYSN    |
| Q3T013 | SSWVELPMNSSNGNDNGNGKNGGLEHVPSSSIHNGDMEKI    |
| Q148M8 | ARPGGRERARLANAQDQARSNRGLLAKIFGAPTPESESRGNS  |
| P20959 | SESKRETEYGPCREMEDTLNHLKFLNMLSPRGIHIPNCDK    |
| O43482 | MVCYLLKTKAIVNASEMDIQNVPLSEKIAELKEKIVLTHNR   |
| Q8K3V1 | RRYKSRGSKEKAAQPLSKSDNDGNARKEIHVKQSGNPCEM    |
| Q3T0T1 | QELIVEAITAGILGDLGSGGNVDACVITAAGAKMLRALSSP   |
| Q9UIV1 | VAMDETFPGVVARPIGEFRSNADYQYQLLRNVNLLKI IQL   |
| Q80V23 | HTGQKPFECTQCGKSFRAKGNLVTHQRHTGKPYQCKECCG    |
| Q9HB20 | TIQEFVHHDENHSSPSAENMNEASSLLSATCNTFITLLEEC   |
| O60939 | TVPATLNVNLNGSDARLPCTFNCSYTVNHKQFSLNWTYQECN  |
| P21812 | PTSDTLREVKLRIMDKACKNYWHYDYNLQVCVGSPPRKRKRS  |
| Q8BGI3 | DLVQRSLVLFSGVVLALVNLQIQNVNLTLPDEVIATIF      |
| P22710 | EDRAERLALLACLAVIPALNLASSDAAAVAGLVMTVLTVG    |
| H3BS89 | ARNRRQLFAMSPADECQRQYNSTNMGLWRKCHRQGFDPEDIA  |
| Q2KJ29 | VPGDIKGETCSAKQHLDPHRNGETKADSSNKEAAEEKQEE    |
| O75558 | FLQMAVLVEKQADTLNVIELNVQKTVDYTGQAKAQVRKAVQ   |
| Q99895 | VLTAACHCISNTRTYRVAVGKNNLEVEDEEGSLFVGVDTIHV  |
| Q3SZ21 | VIISAAERPLEIRGPYDVANLGLLFGLESADAKAAVSTNC    |
| Q9QVN7 | LKNMPITLHLLQSTRVGMVSNALRKQSSDEELIALAKSLIK   |
| P51908 | CLLYEINWGGRHRSVWRHTSQNTSNHVEVNFLEKFTTERYFR  |
| P02722 | GNCITKIFKSDGLRGLYQGFNVSVQGII IYRAAYFGVYDTA  |
| Q9CY94 | SVELPKMYQEGWRTVFSADANVVDLHKMGPHFYFGSOLLH    |
| Q15475 | SFGFTQEQVACVCEVLQGGNLERLGRFLWSLPACDHLHKN    |
| Q9JJW0 | NKLLRQRRYHAALAVIKGFRNGAVYGVKIRAPHALVMTFLF   |
| O35955 | TLFRYQGHV GASLVVGGVDLNGPQLYEYVHPHGSYSRLPFTA |
| Q9R0X0 | LEFLQSFGLGSHAPGAPTTFGNRHDVYGPADTMIQYMELFN   |
| P0CG37 | TVSLALQI INLGNSYQREKHNGGREEVTKVATQKHRQSFLN  |
| Q17R31 | PEDQRSVTLKDLVALPI IENYKDRLLAIGEVLDFSPRFA    |
| P20033 | KLKEVQVRLEEHELECACATSNLNPDHREETGRRRESGKNR   |
| Q99KX1 | DMFGMMNDMIGNMEHMAAGNCQTFSSSTVIVSYNNTGDGAP   |
| Q8K1T1 | VLPGAFFDKLEKLQTLIVTHNQLDSVDRSLALRCDLELKAD   |
| Q8R191 | VNEGYVNSDSGPELRCVFNAGACRFGVVVLGLGAFIACVA    |
| Q29RZ5 | AANRDEFYHRPARAADFWGSNNEVLSGLDMEEGKEGWTWG    |
| Q3URF8 | VQPLIEALQEKEVELSKAEKNAMLNITLKQRVQTVHFTVRE   |
| Q0II65 | AFWKYRI FWKEDRAFWKEDNALWERDRNLLQEDKALWEEE   |
| Q9XSK0 | REEVALKINLPESRVQVWFKNRRAKCRQQRQQKQQQPPG     |



|        |                                            |
|--------|--------------------------------------------|
| Q9BQT8 | GVFNMVYFGFYNNVKNMIPVNDKPILEFWRFKFGIGLLSGTI |
| P0DMD0 | IKHIINQHPNTLFIIVFMAIANVHFDEYLLVRKNLLISSKSI |
| O60637 | YRAKVENEVDRSIQKVYKTYNGTNPDAASRAIDYVQRQLHC  |
| Q9DB05 | QLHLQLQSKHDAATCFVDAGNAFKKADPQEAINCLMRAIEI  |
| Q64279 | ERRRTEINSAFaelRECIPNVPADTKLSKIKTlRLRlATSYI |
| O35943 | NPRWREPIVTCGRRGLHVTVNAGATRAHLNLHYLQILNIK   |
| Q99M03 | VCVEGPQSACEEFWSRLRKLNWKRILIRHREDIPLDGTAGG  |
| P13949 | RPLNSQSVNKYILNVQNIYRNSPVPVCRVNRKRILYANGA   |
| Q99020 | LKDYFTKFGEVVDCTIKMDPNTGRSRGFGFILFKDSSSVEK  |
| P08034 | TEKTVFTVFMLAASGICILNVAEVVYLIIRACARRAQRRS   |
| Q58DS3 | DGLAALQQRGLAPALLYQFLMNGIRLGTYGLAEAGGYLHTAE |
| P17936 | HAKDSQRYKVDYESQSTDTQNFSSSKRETEYGPCRRMED    |
| O95760 | SNCVSFECKTDPGVFIGVKDNHLALIKVDSSENLCTENILF  |
| Q9TR36 | WGLQSKVENFIQKQEKRIFTNFHRQLFCWIDKWIDLTMEDI  |
| Q6UWM5 | KEEKCVKNLCRTPQLIIPNQNPFLKPTGRAPQQTAFNPFSL  |
| Q6ZMS7 | LLQEYGLLQRRLENVENLLRNRNFWILRPPGSKGEAPKVP   |
| Q6ZUS5 | QEQWYLESLIQARQLQGSHNQCLNRQDVPKTTPSLPQGTK   |
| P45879 | QKVNKLETAVNLAWTAGNSNTRFGIAAKYQIDPDACFSAK   |
| Q9H560 | GANPNIKDIYSNTALHYAVYNKGTSLAEKLLSHHANIEALN  |
| Q8CFI2 | SILHPPVDDPQSGELPSEWRNPTQNVRTILLSVISLLNEPN  |
| P57052 | NNTSLPQYFYLQKMQWHVYNPVLQLPYEMTAPLNSASV     |
| Q00262 | FMDMAMFVETQGEVMNNIERNVNSVDYVEHAKEETKKAIK   |
| Q32KU2 | SHTAPQDDLMLIRLAKPAILNEKVQPIALATSTVKPGTICM  |
| Q6UX82 | GKECSNTSDALDPPLKNVSSNAECPACYESNGTSCRGPWK   |
| Q3SYZ9 | VLAPQYPWQSNMAMNMLPPNHSHDFLLEPPGHNKENEDDV   |
| Q3T0Y3 | ILDKIIYHTSFEMMKDNPLVNYTHLPSEVMDHSKSSFMKRG  |
| O09116 | MVPGPSPSSTSEPSSEPCINVREPGYMNASEPTHAKVFDQ   |
| Q80WY3 | RVLCFVLRRTCPCLGASGDNAHTIKYCPLSKVPPPTVRPP   |
| Q4JM65 | NNQFNMYMEFLQPGIQLQQNSPVCDEATLGTAGENYVI     |
| Q58DN3 | QQGFHHTKGCVGQFEKWLQDNLIVVAGVFGIALLQIFGIC   |
| Q8R0W6 | YWLWWVFLVLGFLFLRGRFINYAKVRKMPETFSNLRTRVL   |
| Q3T106 | TGMPRRSRFDRPPARRPFDPNDRCYECGEKGHYAYDCHRYS  |
| Q8WTR2 | LVHCNAGVSRAAAIVIGFLMNSEQTSFTSAFSLVKNARPSI  |
| P05408 | LTGDNIPKDFSEDQGYPPPNPCPVGKTADDGCLENTPDTA   |
| P25393 | ILRHLKNALMIYGMskVDTNDCRGMSRKIMTTEVNKTLLD   |
| P68250 | AELQDICNDVLQLLDKYLIPNATQPEskVfYlKMKGDYFRY  |
| Q2T9L9 | PVRLSQQLDKVVTNYKPVANHQYNIIEYERKKKEDGKRARA  |
| Q2HJ98 | KPSTAYAPEGSFVLVPAYTRNLHHELELAVVMGKRCRAVSE  |
| Q53HV7 | FSEPVGIIYNPVEYAWEPHRNVVTRYCQGPKEVFLGMNPG   |
| Q8VI88 | YFIGWLVLILYFTCGILCYLNHKNYWSLIMSSTTINTACSS  |
| O60259 | WQAALFQGGQLLCCGGVLVGGNWVLTAAHCKKPKYTVRLGDH |

|        |                                             |
|--------|---------------------------------------------|
| Q8BUY5 | KDAMSHFAIAGAVTGGGLFRINLGVRLVAGSIIGALLGAPM   |
| Q3SZW6 | QHYPCTTWRHQLEREDLGPPNTAAASAPEMIQHSLWRPVRN   |
| P51180 | LGAVAGAAVLYSVTPPAVRGNLALNTLHAGVSVGQATTVEI   |
| Q9UKR8 | PDDYSTQWNLVMEKLCCKGVNNYTDGSSSFEMTTGHTYPR    |
| Q3U1C6 | EQRQVLIRQVQLAKRLNVPLNVHSRSAGRPTISLLREQGAE   |
| P14231 | TGQPCVFIKMNRVINFYAGANQSMNVTCVGRKREDAENLGH   |
| P04179 | LQPALKFNGGGHINHSIFWTNLSPNGGGEKGELEIAIKRD    |
| Q9WV55 | DRKVCFKVKTAPRRYCVRPNSGIIDPGSIVTVSVMLQFFD    |
| P16110 | VLDFFRRGNDVAFHFNPRFNENNRIVCNTKQDNNWGKEER    |
| Q99967 | GPPVASQGGSLPASMQLQKLNQYFNHHPYPHNHYPDLHP     |
| Q9WTN0 | WLKVPEDKLQIIIEVTEMLHNASLLIDDIEDSSKLRGFPV    |
| P10522 | VGDPHRKDGSIVIHNLDYDNGTFTCDVKNPPDIVGKTSQV    |
| Q9CQL0 | QVTITDRKVALEFLKSNVEANLPPHIQPKAVVKELTWGQNL   |
| Q505H4 | PVCDQPECPKIHKPKCTKVEHNGCCPECKEVKNFCEYHGKNY  |
| Q91WD9 | FISAAELCNFLRDLFLHKKNISEAELEBYTSTMKIFDKN     |
| P11911 | CLGPGCQALRVEGGPPSLTVNLGEEARLTENNGRNPNIW     |
| P07992 | GSEPLAGETPNQALKPGAKSNSIIVSPRQRGNPVLKFVRNV   |
| Q5JUR7 | RFTCKGLNIVHRIKAYKSVLNYLKTSGEYKLAGVFLGGRSM   |
| Q8NBQ5 | TAAKCKGLGAKVHTFVVDCSNREDIYSSAKKVAEIGDVS I   |
| Q96H12 | YNSQPSVSLRDFKQLKKWENIKARTKKIMAHERRKVKRS     |
| Q8C3M9 | LVKQEVKRLGGEYIGIRLRENEFDPKGRQLTFLDDMVNQV    |
| P70331 | LPNGSSHDHLEPGSAGHAGNGALGGSAHRKLQTHPSLGS     |
| Q9QY36 | HRRLGLAQKLMQASRAMIENFNKAYVSLHVRKSNRAALHL    |
| O88630 | RMFETMAIEIEQLLARLTGVNDKMAEYTHSAGVPSLNAALM   |
| Q3ZBW4 | VISCAKDGVKFSASGELGNKIKLSQTSNVDKKEEAVA IEM   |
| Q58DN3 | LIDFAQEYWSCCGARGPNDWNLNIYFNCTDLNPSRRCGVP    |
| P82348 | GWRKRCLYLFVLLLLAILVVNLALTIWILKVMWFSPIGMGH   |
| P27573 | SIVIHNLDYSDNGTFTCDVKNPPDIVGKTSQVTLYVFEKVP   |
| Q8N8L6 | LSEAMSMGELQRELGLQAIDNQREVFLLAASIAPAGPTFEE   |
| P36980 | QTHLEGDTVQIICNTGYRLQNNENNISCVERGWSTPPKCRS   |
| Q3T046 | GFVHHGTILDCEETDWFMSMNLNVRSMYLMIKAFLPKMQ     |
| Q96FX7 | ALAARGFSELSTLEVLQVYVNVRTVSLPPDLGTGTDGFAG    |
| Q9QZ06 | CRLRLGYAVYETPTAHNGAKNPRWNKVIQCTVPPGVDSFYL   |
| P53810 | CPYMCAYKLVTVKFKWGLQNKVENFIHKQEKRLFTNFHRQ    |
| Q8TCD6 | FDKVFTNPAAFNSNGHLTVENYHTHSCNRCPKNLCKKVLI    |
| O35257 | QPCFSGTLLMLLASNFLWKNVAPVPMYASLDEYGEMSIYD    |
| Q969T4 | SPALTI SKVLLSICSLLTDCNPADPLVGS IATQYLTNRAEH |
| Q8N4C7 | DLRDLFIQISLLVEEQGESINNIEMTVNSTKEYVNNTRKEF   |
| Q91XF0 | GAVVSRQSSVIPDREYLRKKNEELGQLYQDQEVKPEYWG     |
| Q04743 | RYLGHRFQGNDSPEFLLHNLARKPKRIRTAFSPSQLLR      |
| Q3T0M7 | YITPMMELKPNAGSDRAWVWNTHADFADEC PKQELLAIRFL  |

|        |                                             |
|--------|---------------------------------------------|
| P62956 | CVASEYFLEPEINLVTENTENILKTVRTATPFPMVSLFLVF   |
| Q61820 | KVDVKDMVKAKPILFHRKKNLQYYDISARSNYNFEKPFVW    |
| P19639 | RKHNLGTEEBEERIRVDTLENQVMDTRIQLMIVCCSPDFEK   |
| P61106 | AKTGENVEDAFLEAAKKIYQNIQDGSLDLNAESGVQHKPS    |
| Q9EST4 | QLRSTPFRYLLTPCLQKSVQNKIKSLNWLEMEKSRICIPMS   |
| Q8C8C1 | KQLCYECGTARLDESSMLEENIESLVDNLITSLREQCYGER   |
| P00756 | WHVAVYRYTYLCCGVLLDPNWLTAACHYDDNYKVWLGKN     |
| P11019 | YEKKEKQIEQQKIQMSNLMNQARLKVLRARDDLITDLLNE    |
| P10648 | EFEEKFIQSPEDLEKLLKDGMLFDQVPMVEIDGMKLVQTR    |
| A5D7U1 | TVSTQVSHGII SVVLEARDQNKSVIGSWENPSDHCEGRAEY  |
| Q7TMJ8 | QRITLPLSAFTNPTCETVDENTII VHSNQTPADVQEGSTLL  |
| P09024 | RGRQTYTRYQTLELEKEFHYNRYLRRRRRIEIAHTLCLTER   |
| Q2HJF4 | QKIAKEMNLSETAFIRKLPNDNFTQSSCFGLRWFTPQNEV    |
| P13726 | NLTWKSTNFKTI LEWEKPKFVNQVYTVQISTKSGDWKSKCFY |
| Q8WV92 | DNTKRCNLREKISKYMDRAENIKKYLDQEKEDGKYHKQIKI   |
| Q6UW56 | LANTFRGFTQLQTLILPQHVNCPGGINAWNTITSYIDNQIC   |
| Q29RS4 | KLLKVS RDKSFLLDRLLQYENVEDSSSDATASSDNSETE    |
| P32326 | RKYNMTPSQFRLQSRQSNPNFITNLSLRSNPIEFDKIDE     |
| Q8WUJ1 | KEPRCVCVRTTGPPSGQMPDNPPHRNRGLDHPNLAEYTG     |
| Q9UBT3 | VLLGLSWLCSPLGALVLDFNIRSSADLHGARKGSQCLSDT    |
| P29692 | SLRGVVQELQQAI SKLEARLNVEKSSPGHRATAPQTHVS    |
| P24699 | SPVWSRKNSSFDSIYCPDVSNACAADKSSVSSLDCLSSIVD   |
| A8MWP4 | RAQCQPLTQRPHSLHLQDSRNASSLPHKGWRCNFPQGPAG    |
| Q8N488 | RQAKPAADEGFWDCSVCTFRNSAEAFKCSICDVRKGTSTRK   |
| A7E369 | QPPLPPDSPRYCMISDLFIDNYQVKCINGKMCYVQKQPAPH   |
| Q9NX70 | SLQTLMKVAAQNLIQNTNIDNGQKSSDGPQRFDKCLEEFY    |
| A6H773 | YSVVLSEKSTVFHQNDVKIPNSTHVFTTFYAKTKSLLVNPA   |
| P15018 | RIVVYLGTS LGNITRDQKILNPSALSLSKLNATADILRGL   |
| A6NCN2 | EMKATVIRHGETLRRTKEEINELNRMIRLTAEVENAKCQN    |
| Q95865 | DGTDVLF TGREFFVGLSKWTNHRGAEIVADTFRDFAVSTVP  |
| Q86TG1 | ALICLLRYGQLEQSRHSWVNTALITGCTNAAGLLVGNF      |
| Q9BQY9 | ADVFLPCEDPPPPTQSSGMNHLLELSLFPVPTSDRTTSRTS   |
| Q8BVN0 | IKNLKTMKEDLMENLQDSQGNCIQIQEDI SEIKNKIMTVK   |
| P19217 | VKLLPVSFWEKNCKII YLSRNAKDVVVSYYFLIILMVTAIPD |
| P01241 | PVQFLRSVFANSLVYGASDSNVYDLLKDLLEGIQTLMGRLE   |
| P52823 | IAKRNPEAITEVVQLPNHFSNRYNRLVRSLECEDEDTVST    |
| Q96L14 | EKQLQAINAMIDPDGTLEALNMGFP SAMLSPPKQKSSPV    |
| Q10738 | ALPLSQEAGDVSAHQWEQAQNYLRKFYPHDSKTKKVNSLVD   |
| Q99836 | SSLPLAALNMRVRRRLSFLNVRTQVAADWTALAEEMDFEY    |
| P30039 | PDTQKLLVRLSDVYNRSFLENLKVNTENLLQVENTGKVKGL   |
| Q2KID0 | KRWKVETNSRLDSVLLSSMNLPGGELRRRSAEDELAMRGF    |

|        |                                               |
|--------|-----------------------------------------------|
| Q9NUP1 | KAEAE LGTFPRAF KKLHTMNVPSLFSKSAPSRPQQAGYEA    |
| Q5SZD4 | FLKGPS PRLTYLSVANADLLNRTWSRGGNEQCLRYIANLIS    |
| P33681 | TTVSQDPETEL YAVSSKLD FNMTTNH SFMCLIKYGH LRVNQ |
| Q3MHR7 | EAVEVTFADFDGVL YHISNPN GDKTKVMVSI SLKFYKELQA  |
| A6NI73 | LMVLLCLGLSLGPR THVQAGNLSKATLWAE PGSVISRGNSV   |
| P29218 | MDYAVTLARQAGEV VCEAIKNEMN VMLKSSPVDLVTATDQK   |
| Q9H190 | VQATAISPPPVL YPNLAELE NYMGLSLS SQEVQESLLQIPE  |
| Q2HXU8 | CNPCPKMWQWYQ NSCYFTTNEEKTWANSR KDCIDKNSTLV    |
| Q8CEZ0 | SYNYGNQDQAEFL CVVSRELNNSTNGI VIEPSEKPRFFRKR   |
| P28161 | YEEKK YTMGDAPDYDRSQWLN EKFKLGLDFPNLPYLIDGTH   |
| Q8N0Y7 | DQLPSYESPKDTI ARALPFWN EEIVPQIKEGKRVLIAAHGN   |
| Q99MH5 | PDSLRAIYGTDEL RNALHGSNDF AASEREIRFMFPAVIEEP   |
| B6A8C7 | SPAGKEIDFSLVDV TAGDAGNYS CMYYQTKSPFWASEPSDQ   |
| Q3ZBG5 | IGCALEDQKKIKRR LETLLRN IENADKAIKLEH SKGAASK   |
| Q8IYP2 | EAELNDYVKLANLP YQTI SENTMCSVSTWSYNVCDIYKEPD   |
| Q9JHL0 | LCVHCSRPGVKRNEKI YEQRNRQENAQSAAAQTYSLARQV     |
| Q14002 | PGPAHNGRETIYPNG TLLIQNVTHNDAGFYTLHVIKENLVN    |
| Q9BGL2 | VASIRVDTVEDEFAYGAEILVNHLDRSLK KALLNEEVAQRA    |
| A5PKE4 | DHLLVENIERETFHLCSRLINGPYRRTVRALVFTLKHRAEI     |
| O43921 | LLLLPLPPPFARAEDAARANS DRYAVYWNRSNPRFHAGAG     |
| Q9JKV5 | QVLVKRIYRLWMFYCATLGVNLVACLAWWIAGGAGANFGLA     |
| Q0P5F2 | TDTAHLSPTEAF CVFYHLKSNPSVMLCQCSCYVAEDQQYQW    |
| Q96SJ8 | AMGGLLFLGLGCGGAVRENK LLLFFFLIILIFLAELS        |
| Q56A07 | SVTLKNVQLEDEGIYNCYITNPPDRHRHGKIIYLQVLLVEP     |
| P37980 | VLGILAMIDEGETD WKVIAINVEDPDAANYNDINDVKRLKP    |
| Q02105 | KFTCEVPGLYYFVYYT SHTANLCVHLN LNARVASFCDHMF    |
| P18121 | LSGSAGMQLLLLVSS LLLWENVSSKPTAMVPTEDLYTRLAE    |
| Q8BQP9 | ESAHKTQRALDDCKMLVQEFNTQVALYRELVISIGDVSVSC     |
| Q9JK39 | GRTSFNGSHVARGEAAVKIHNVTVFDNGTYHCVFKEYTSHS     |
| H3BNL1 | AVFLQRCQEPQRHFFSKHDNRTSFDKGPYCLLQIGIRRKD      |
| Q2YDD6 | LTDGYQNKTDNSELHCVLNSNSTACSIAVGAGLLAFLSSLA     |
| Q8TDB4 | GKDASLRMSSNRFP GSSGSNMIYYLVGVTVSAGGYAYK       |
| P09632 | SQIQEFYHGPSSLS TAPYQQNPCAVACHGDPGNFYGYDPLQ    |
| Q92600 | QEIVNIYPSINPPTLTAHQSNRVCNALALLQCVASHPETRS     |
| B0FP48 | IGCNHPLPGPGFYRVKFLVMNDEGPVAETKWSSDTRLQQAQ     |
| Q8TBE9 | EDVKAMLTELRKEV RLLLLTNGDRQTQREKIEACACQSYFD    |
| Q9D0U6 | SYNPDLDSDPFGEDGSLWSFN YFFYNKRLKRIVFFSCRISIS   |
| Q5E9S8 | QRYLNGVRKNGAAPVLELANEVDYAPSLMARIILERFLQK      |
| Q9ULC0 | IFLLPSICSSNSTGVLEAANNSLVVTTTKPSITTPNTESLQ     |
| Q92629 | EGDSEFLQPLYAKEIQSRPGNALYFKSARNVTVINLNDQTK     |
| Q96EU6 | VPISKKVARDPRFDDL SGEYNPEVFDKTYQFLNDIRAKEKE    |

|        |                                            |
|--------|--------------------------------------------|
| Q5E948 | PDPNTEESPKRKNITYEELRNKNRESYEVTLTHKTDPSVRP  |
| P61019 | TRRDTFNHLTTWLEDARQHSNSNMVIMLIGNKSDLESRREV  |
| Q8VC90 | RCVRRYDHHCPWMENCVGERNHPLFVAYLALQLVLLWGLC   |
| Q32KL5 | QRISASLLDSRSYETLVDFDNHLDDIRNDWTNPEINKAVLH  |
| P0DMN0 | LALLPQTLDDQKVKVVYVARNPKDVAVSYYHFRMEKAHPE   |
| Q80WB5 | YQPVCPTRDACVYNSCYCEENIWKLCEYIKTHNQYLLEECY  |
| Q6PHN7 | LACPPCPGATVIFKLMHMLNGALLALLFPVNVNTRLLPFEL  |
| Q7Z4W1 | MLTKVMALELGPBKIRVNAVNPVVMVMTSMGQATWSDPHKAK |
| Q9CR95 | SVAISNHVTPPPIPKSNHGGNDSIDLDDLSFAPVSTSAPA   |
| Q9CZQ6 | NISDSYFFTFYTENMSWRSANDESGVIMNKWKDDGLVQQQL  |
| O09172 | IEDGVNLSLEHLQPYWEELENLVQSKKIVAIGTSDLDKTQL  |
| A4IFJ1 | AFYFSQGTSKAISKGDFRLANTTSRRALFLATLSIAVGAGL  |
| Q32LM6 | VELPKTDEGLGFNVMGKEQNSPIYISRIIPGGVAERHGGI   |
| Q921I9 | YGPHEIRGSRSRALPDRALVNCQYSSATFSTGERKRRPHGD  |
| P35292 | KSLLFMETSAKLNYQVSEIFNTVAQELLQRAGDTGSSRPQE  |
| Q9R1P3 | LIGIQGPDYVLVASDRVAASNIVQMKDDHDKMFKMSEKILL  |
| P20827 | APLLGLCCSLAAADRHTVFNWSSNPKFRNEDYTIHVQLNDY  |
| Q9HAT0 | QVAGRLIIRAEELAQMWKVVNLPTDLFNSVMNVGRFTEEIE  |
| Q96BQ1 | MCFEDRMIMSPVKNNVGRGLNIALVNGTTGAVLGQKAFDMY  |
| P70447 | QRICKTRRLKANNRERNRMHNLNAALDALREVLPTFPEDAK  |
| Q9BXS1 | DWVDRRQLQRLEEMLIIVDENDKVIADTKRNCHLNENIEK   |
| Q91VU0 | LLTFYVISQVFEIKMDASLGNLFARSALDSAIRSTKPPRYK  |
| Q8K3B1 | LCNLPSYKAKVRAFQAFSTNDCSRNVYIKKNGFTLHRNPI   |
| Q58DU5 | LADARSLADIAREEASNFRSNGFYNIPLKHLADRVMYVHA   |
| P48230 | FSILLVVGGIQMVLCAIQVVNGLLGTLCGDCQCCGCCGGDG  |
| Q9NVP2 | EFIRVGYVNNENYLNPELRENPPMKPDFSQLQRNILASNPR  |
| Q28110 | IITWFRLRRKPIISAGLTDANDAARTEAENTVTYSLLSHPD  |
| O88992 | GQVRASAIQDADQNYDYASNSVILHLDAGDEVFIKLDGGK   |
| P61085 | AVQRIKREFKEVLKSEETSKNQIKVDLVDENFTELRGEIAG  |
| A4IFN5 | AGSLLKELSPLESYLSNKRNVLNIVYFVKVAVAWTFCLLLP  |
| Q8IUW5 | PDNGSSRTLHSRTETTPSPSNDTGNGHPEYIAYALVPVFFI  |
| Q9NXJ0 | TLMIFSLEFFVACATAHFANQANTTNMSVLVIPNMYESN    |
| P56965 | STVPVVDALHLKSFCSMAGPNLIAIGSSESAQKALKIMQQM  |
| Q9CZE3 | DSRTLVRQLWDIAGQERFGNMTRVYVYKEALGAFVVFDIR   |
| Q5EA92 | LSSNDMLLQLRTGMTLSGNNTICFHAKVYIDRFEDLQKS    |
| O43315 | DQVVATMILLIIVFAIFDSRNLGAPRGLEPIAIGLLIIVIA  |
| Q3LI83 | RNGSNCFGQLNCLSKSFQTLNHCRLSTLGYKSYQNPCFIPS  |
| Q9R1P0 | LYQSDPSGNYGGWKATCIGNNSAAAVSMLKQDYKEGEMTLK  |
| Q1W209 | IGPSPLAASPAFLGQGVFLNPFSTLGSKSRFSGAGASTP    |
| Q17R31 | LTSICLETDSPALGPEKQVRNEPWNISISAEYIAQVKGISV  |
| Q3T0C2 | VDHFGKLDILVNNAGVNNNEKNWEKTLQINLVSVISGTYLGL |

|        |                                            |
|--------|--------------------------------------------|
| P52743 | GKLCCKNDCHKVFSNATTIANHWRIHNEEDRSYKCNKCGKIF |
| P29084 | LVNNPKIEVIDGKYAFKPKYNVRDCKALLRLLDQHDQRGLG  |
| P35270 | GSLGDVSKGFVDLSDSTQVNNYWALNLTSMCLTSSVLKAF   |
| Q3SYW9 | KMSLNERFTNMLKNKQMPFVNIRASMQQQQLASARNRRLA   |
| A6H789 | LQTLDLSDNRIQSVHKNAFNNLKARARIANNPWCDCTLQQ   |
| P35705 | FVCPTEIIAFSDKASEFHDVNCEVVAVSVDSHFSHLAWINT  |
| Q9Z2Y8 | GHGQRTFGENYVQELLEKASNPKILSSCPEIKWHFIGHLQK  |
| Q96CS2 | KASEYESEAKYLQDLLMESVNFSPANLSTSGSRYLNALVDS  |
| P06343 | RWFRNGQEETVGVSTQLIRNGDWTQVLVMLEMTPRRGEV    |
| Q60682 | KEWAWIHNGQSKLDMKIKKMNFTSRGCVFLSKARIEDTDCN  |
| P47962 | GLTNYAAAYCTGLLLARRLLNRFMGDKIYEGQVEVNGGEYN  |
| P46777 | YDSEKFEFNAEVHRKHIMQNVADYMRYLMEEDEDAYKKQF   |
| Q86TA1 | EVQINNEEIFPTCVGVFPFKNFLQICKKILCRLFRVVFHVY  |
| P62492 | RIVSQKQMSDRRENDMSPSNNVVIHVPTTENKPKVQCCQ    |
| Q91V79 | HVNSRTIFASHGNFFNIKFVNSAWGWTCTFLGGFVLLVVFL  |
| Q9D9M5 | DVAMPREGYTLHRTLAKMSQNLPESSIVVSSGVEIISH     |
| O60635 | TDFEDSPYFKENSAFPFPCNDNVTNTANETCTKQKAHDQK   |
| B2RXH8 | LQAIKQELTQIKQKVDLSLENLEKIEKEQSKQEVEVKNAS   |
| Q9Z210 | VLRFCITVSHLNRALYFACDNVLWAGKSLAPRVDQEKWAQ   |
| Q8TBE3 | WCVRCHEPRWSYRAGHMEEANGLVRWPEEAPDLGQREEDLQ  |
| Q99218 | FAMPLPPHPGHPGYINFSYENSHSQAINVDRIALVLTPLKW  |
| Q9Y235 | LKELIELPPFEIVTGERLPANFFKQFRNVEYSSGRNKTFL   |
| O18979 | LATSSTRAQQRAAAQRRTFLNAHRSAAQVPEPPESDHED    |
| B9EJG8 | ASFGMTLLGNFQLTNDIEIHNVGTSLTFGFGTLTCWIQAAL  |
| Q8BGN6 | NTIKFWQTYSIKGPPTGSDVNKEKIDVMSLLTGLIVAGVFL  |
| P01139 | GDKTTATDIKQKEVTVLAEVNINNSVFRQYFFETKCRASNP  |
| Q02242 | CSLSNWSEDLMLNWNRLSPSNQTEKQAAFCNGLSQPVQDAR  |
| P12970 | VNSEDKGAALAKLVEAIRTYNDRYDEIRRHGGNVLGPKSV   |
| Q6Q7D1 | LGSHLVLTAAHTEALLQQVVGNCRKLGAPKVIFYIADMASPE |
| Q02399 | TTSLVNVVPEKLNATGRDLLQNLKCNPVQRISAEALQHPY   |
| Q2TBL9 | GQRDGIRVGHAVLAINGVDVNGKYTADGKEVLEYLGNPANY  |
| P10649 | ADIVENQVMDTRMQLIMLCYNPDEFKQKPEFLKTIPEKMKL  |
| Q8VI64 | SQEGADTSQEGADTTKEEADNSKEAEGTTTEDPRSISEESA  |
| Q3UX61 | MKRDLSQMTDELRRQLVLKKNRYVVLGSEETQGGTLPDAGE  |
| A6NI79 | ETVKEKNLILEEKITTLQOENEDLHVRSRNQVLSRQLSED   |
| Q3SX11 | EKIQMKKTIKMHEKRNTKQKNDEKTPQGAVPAYLLDREGQS  |
| P49788 | SLLEGEGERLGKCSARVFFKNQKPRPTINVTCTRLIEKKKR  |
| Q9D9M4 | LGLGLVVIQNGPYLQISHLINKGAAASDGILQPGDVLI SVG |
| Q6P073 | LHRGQHGIQLLNHAPAAGPNLAGLPQANRHHGLLGGALAN   |
| E9PW74 | LHLALLVQRADVPPFGQEASNAVQLMQEELLGDSCKNYMAVL |
| Q3ZBG4 | PADIMEKNSSSPVAATPASVNTTPDKPKTASEHRKSSKPIM  |

|        |                                             |
|--------|---------------------------------------------|
| Q9Z2H6 | QWHESEARNCSGMSHSLVNTINTEAEQNFVTQLLDRKFSYFL  |
| Q58DF9 | VEILAGEFNDSAASEMFI FHNGGVQILCKYPDTVRQFKMQL  |
| P11456 | GAGLVQINKSNGKETVVGRFNETQIFNGSNWIMLIYKGGDE   |
| A6NLW8 | KTNHRRCRTKFTTEEQLKILINTFNQKPYPGYATKQKLALEI  |
| P11234 | REQILRVKAEEDKIPLLVVGNKSDLEERRQVPVEEARSKAE   |
| P14415 | KFHVNYTQPLVAVKFLNVTNVEVNVVECRINAANIATDDER   |
| Q9CR48 | CSSILYSSDFGPDVVQKLHWNPEDKGYVLHLVTTAAEWSMS   |
| P22352 | YVLFVNVASYUGLTGQYIELNALQEELAPFGLVILGFPCNQ   |
| Q3T0Y9 | VLERLARPGLEVPLRPQGLANPATLTAGQPREAGEEEQDAV   |
| Q6PL45 | PKPRLQTLRMTLPSPHMPRPNQITILVDVARNAATITVTFPQ  |
| O14618 | LLEGTGRQAVLKGMSGQLQNLGAVAI LGGPGTVQGVVRF    |
| Q8BPA8 | NANPIFMRKDTKTSFQWRIRNLPYPKDVYSVVAQKERCVI    |
| Q96L33 | HNPQAPVLLVGTQADLRDDVNVLIQLDQGGREGPVPQQAQ    |
| Q96K30 | SLTHLNVSTGHPATSAPHTNGPQDLRSTSGVTFRSPLVT     |
| Q58DH1 | APFLEKSTRQAPRGTKNTNLSLKSNGKLASSPVEDETA      |
| P18181 | VLDLIVTPQNKSTFYTCQVSNFVSSKNDTVYFTLPCDLARS   |
| Q9H444 | EFLEKKIEQELTAAKKHGTKNKRAALQALKRKRKRYEKQLAQ  |
| P21812 | NLHDIMLLKQKAKETPSVNVIPLRPSDFIKPGKMCRAA      |
| P27105 | AEAEASREARAKVIAAEGEMNASRALKEASMVITESPAALQ   |
| Q9EP72 | SGPPSYFIKRESWGWTDFLMNPMVMMMLPLLI FVLLPKVV   |
| Q5T7N8 | QPKTHHTGMHTQTHREERERTQRLDRRENGRHRTHRHT      |
| Q17QI8 | VQPSSFQNITEKWLPEIRTHNPQAPVLLVGTQADLRDDVNV   |
| Q9UFN0 | LVGVFHTEYGAALNRVHVLWVWNESADSRAAGRHKSHEDPRVV |
| P43431 | QQIILDKGMLVAIDELMQSLNHGETLRQKPPVGEADPYRV    |
| Q08AT1 | ELLALHAKETQRGYPALLGNKLDMAQYRQVTKAEGAALAG    |
| P01374 | SLLWRANTDRAFLQDGFSLSNSSLVPTSGIYFVYSQVVFS    |
| P35330 | TVPQEATATFNSTALKKDGLENFSCQAEGLDRPHGGYIIRSI  |
| Q4PNJ2 | QYRPRYVTGYAVWLVLWVTWNVFVICFYLEAGDLSKETDLI   |
| Q86SE9 | FCKTCIVQHFEDSNDPCRCGNQVHETNPLEMLRLDNTLEEI   |
| Q9JM90 | VGKLDIIDLVCLTGQHSTEKNAKFTLVLPKEEVHVKTENT    |
| A1A4M2 | RGSLLWNQDGTLSLSQRQLNEEERGLRDVAALNGLYRVR     |
| P48060 | WMVSFVSNYSHTANILPDIENEDFIKDCVRIHNKFRSEVKP   |
| O70273 | GIFRFLKSEAVAQLWGKKKNNSSMTYEKLSRAMRYYYKREI   |
| Q9JIM5 | APPEMFLPSDYGGQLFQPASNLDYYSQSFSVDTFDEEPPLL   |
| Q96C74 | KEKFKALLQLDPCENKIKWINFLALGCSMLGGSLNTALKHL   |
| Q6Q8B3 | RGQPSCTKAYKKTNETKETNCTVERITWVSRPDQNSDLQI    |
| Q15800 | LLPENPLQEPFKNAWNYMLNNYTKFQIATWGS LIVHEALYF  |
| P35282 | DEDSFQKVNWVKELRKMLGNEICLCIVGNKIDLEKERHVS    |
| Q6GPI1 | QVLKIAKVFNPKFSLITVNNIDITLLKLATPARFSQTVSAV   |
| Q8TDN7 | SEVDWCESNFQYSELVAEFYNTFSNIPFFIFGPLMMLLMHP   |
| Q9CWU6 | RQLELLVEYVRKQMQYLD SMNGEDLLLTGEVWRWRPLVEKNP |

|        |                                             |
|--------|---------------------------------------------|
| Q9HBM6 | DRYCLTAPNYRLKSLIKKGNQGRVLPRLSVGAVSSKPTTP    |
| P20941 | DSIPPSKKEILRQMSPPQSRNGKDSKERVSRKMSIQEYELI   |
| Q3T004 | LTLCLRAYSDLSRGYSLFSYNIHSDNELLVFKNGIGEYSL    |
| Q3ZC21 | EEVDCLVLQLHRVGEQLEKMNGQRMDELFLVLRDGFLLPAG   |
| P16563 | SVNPTGSDILKMEWSIQATTNAQKWANKCILEHSSKDDRKI   |
| Q3ZCI8 | IVQAKERSYETVLSFGKRGLNIAASAAVQAATKSQGALAGK   |
| Q7RTU4 | RRMAANVRERKRILDYNEAFNALRRALRHLGGKRLSKIAT    |
| Q2KJA5 | DFCLSILTLCSYMEVPTYLNFKSMNHMNYLPSQDGMTHNQ    |
| Q58DM3 | CPKGSAVKGCYIQAKQWFHSNFLYIGITTICVCVIQVLGMS   |
| Q06348 | NLSEARVQVWFQNRRAKFRNRERAMLATRSASLLKSYGQEA   |
| Q9EQU5 | KEQQEAIEHIDEVQNEIDRLNEQASEEILKVEQKYNKLRQP   |
| Q9D8S4 | LDIEKDQIEMACLITDSDLNLAEGPNLIKQPDELLDSM      |
| Q7TQB0 | RLLLGSLIIGGLSAISSATGNTIALQMAACENYTIYKMMMA   |
| Q9D902 | YAFKPKYNLKDKKALLRLLDNHDQRGLGGIILEDIEEGLPN   |
| Q8IUA0 | WHFDFKNYRCTPFKYRGCENANNFLNEDACRTACMLIVKD    |
| P36369 | TRWQKSDDLQCVFITLLPNENCAKVYLQKVTDVMLCAGEMG   |
| B5L3F2 | YNAEHTISASISSVLKQTYANWELLVCDSSDNTRFKVLE     |
| Q6GUQ1 | WKKPHPGALTCDAICSKPCLNGGVCTGPDRCAPGWGGKH     |
| O60762 | VRSPRQNKYSVLLPTYNERENLPLIVWLLVKSFSSEGINYE   |
| P58466 | NYVKDLSRLGRDLRRVLI LDNSPASVYVHPDNAVPAWFD    |
| Q99801 | RAHLAKNLKLTETQVKIWFQNRRYKTKRQKLSSELGDLEKH   |
| Q99JL1 | PKMVEMHNYVPANSLQQKLSNWGHNLNRKVLNKNLNFVPPDV  |
| Q921N7 | FSYSTSVVSLAFLPYLLSQNNMMFGSLPLQVLFYGVMSFT    |
| P39905 | KGRRGQRGKNRGCVLTAIHLNVTDLGLGYETKEELIFRYCS   |
| P06798 | RIEIAHTLCLSERQVKIWFQNRMRKWKDHLKLPNTKMRSSN   |
| Q2YDF1 | IRALRAAPGGGFQNIACLRSNAMKHLPNFFHKGQLTKMFFL   |
| Q96H79 | IHAASLKLQDQGLNIPSVVNFQIISTYKHKMLHKMLENTD    |
| O14966 | SKENGF TGWETETSVKENKNI NEAMRVLEKMMRNSTEDIMS |
| Q1LZ83 | DTTYCVKKLPRNPERKEI IGNGEQYVYVKDGDIIKTEGAT   |
| P35737 | WMKNGQLVPSHSNKEKTAQPNGDWTYQTVSYLALTPSYGDV   |
| P70331 | GKAPAVRIHRQTASPTCCLRNAQLSGTALRSLRLESQGHRE   |
| P20290 | TNQGTVIHFNNPKVQASLAANTFTITGHAETKQLTEMLFSI   |
| P48540 | IKRLKRS PDKQAAALPRRERNRQAAAASPENS RKGRRGQR  |
| P61019 | FINTAKEIYEKIQEGVFDINNEANGIKIGPOHAATNATHAG   |
| P97461 | GRYAAKRFKAQCPIVERLTNSMMHGRNNGKMLMTRIVK      |
| P52823 | NVCSIAKRNPEAITEVVQLPNHFSNRYNRLVRSLLECED     |
| Q13491 | LGVAWLGVFGFSAPVFMFYNIWSTCEVIKSPQTNGTGVE     |
| Q9QYI6 | FTNGKQRGNGSPFEQSFNFDDLFKDFNFFGQONTRSK       |
| Q32L26 | VFDLNGDSFISKEEMFHMLKNSLLKQPSBEDPDEGIKDLVE   |
| Q9R0M5 | CGLIPVGQPCNQVTTTGLKWNLTNDVLFGFTLVSTSNYDG    |
| P46782 | RKAQCPIVERLTNSMMHGRNNGKMLMTRIVKHAFEI IHL    |



|        |                                              |
|--------|----------------------------------------------|
| Q9BUB7 | LRRPGRAQIPVYWEGYVRFNLNTPSDKSEDRLIYTGNMARA    |
| A1XBS5 | EMLFHGKALEVYTAAYQNIQNIQDEDEDELEVFNRNSLYAPDYS |
| Q9BX51 | TAHLSVVAEDGSAVSATSTINLYFGSKVRSFVSGILLNEM     |
| P35293 | PELAATIGVDFKVKTIISVDGNKAKLAIWDTAGQERFRTLTP   |
| P15947 | NWVLTAACHNDKYQVWLKKNFLEDEPSAQHRLVSKAIPH      |
| Q9BTE7 | KEEWLKGMTSLQCDCTEKLQNKFDLRSQNDISSFKNIYR      |
| Q8SPU8 | SIVIVSSIAAYSPPPSLGPYNVSKTALLGLTKNLALELAES    |
| P43025 | TPQSELENEALFEYARHSVGNANDIWLGLNDMAAEGAWVDM    |
| Q5FW52 | GIAPQQKHGLALDEPARTESNSKASVLDLPVEHSSDSPSRP    |
| Q9ES30 | SSNHAVLKLAKGDEVWLRMGNGALHGDHQRSTFAGFLLFE     |
| O95999 | PFSTNSSLNLPVLEVGRTEINTIFSSTTLPRPGDPGAPPLP    |
| Q6IRU5 | EKAKKDLEEWNRQSQSEQVEKNKINNRIADKAFYQQPDADTI   |
| P34927 | VCVITSQNSQLREDDLALRQNFNLTVSTEDQVKALSTQGS     |
| Q6PB51 | LWKPLPELLPEKPKPSSSPKNYRRESQAKHAAPGTAFPQRT    |
| Q8NG50 | QALALNSSKCQELANYFPGNGCSKRIIKLQELSDEEREN      |
| Q9JHB3 | KQYLLTGQILSDGKVF IHLKNYIEPWEDLSLVQRESLNHHY   |
| Q9CPT3 | QPGDCVMVGDITLETDIQGGLNAGLKATVWINKSGRVPLTSS   |
| Q2YDD6 | FCFLANQWHRSPPRYFLLGSNSAKAAITFSFFSILVWIFQA    |
| Q91ZT9 | ANPNALDGNRDTPLHWAAFKNAECVRALLESGASVNALDY     |
| O43240 | PEAYGSPCARGSQPWQVSLFNGLSFHCAGVLVDQSWVLTAA    |
| Q3ZBG0 | KSVAKLQDERTVRKICALDDNVCMAGLTAADARIVINRAR     |
| Q61759 | ICGGVLLNPNWVLTAACHYGNQYNVWLKGNKLFQHESSAQH    |
| Q9H2R5 | QLRTTSRVI PHPRYEARSHRNDIMLLRLVQPARLNQPVRPA   |
| Q96ET8 | FITCMVTI ILLLSCDFWAVKNVTGRMLVGLRWNNHIDEDGK   |
| Q9CXS4 | KAQHTFCRCRGVQSFYTPRSNPGGFGIAPHCLDEGTVRSV     |
| P52744 | DKSLCMLSRLTQHKKIHTRENFYKCEECGKTFNWSNLSKP     |
| Q9UKR3 | LELQSPVQLTGYIQTLP LSHNNRLTPGTTCRVSGWGTTS     |
| P55041 | ERTLVVDGESATI ILLDMWENKGENEWLHDHCHMVGDAYLI   |
| P19159 | SCHTNSFHTPEERDKAQMNEDLSKWTLVLLYSWNNPLY       |
| Q9D6N1 | QKITDILDSIKEKGRQTRFTNFDPLCLLSSWDYWTYPGSL     |
| Q3T0M9 | FVNTVPTKGFNTEKIKVTLGNSKVTFFHFDVGGQEKLRPL     |
| P19159 | ELRNMKNLSEAVISSAMEIENMSEKLQAFIESQFRKIIVPV    |
| Q8TAY7 | ARRQEPALRGS PGPLTPHPCNELGPPASRTPRPVRRGSGR    |
| Q4PNJ2 | CVLERQIFDFLGYQWAPI LANFVHIIIVILGLFGTIQYRPR   |
| Q8N966 | LRHDHHCFFTGNICISRNMRNFVLFCLYTSLACLYSMVAGV    |
| O14798 | SCTMTRDTCVQCKEGTFRNENSPMCRKCSRCPSGEVQVSN     |
| Q2YDD6 | LDEGGVLTSLSPSAASPVNTPTTGP HGPSYASSLSPYL      |
| O35326 | SRGGRGRGRYS DRFSSRRPRNDRRNAPPVRTENRLIVENLS   |
| Q9CZJ6 | ESYTLGSSEKQIVSEDKELFNLESRVEIEKSIKQMEEVLT     |
| Q8N6G2 | GPRAPDPSLCHHNLQPTDDPNWDSYATTMRTAFTPKTGAVP    |
| Q9D2Z4 | NSNQAAGGTHWSLLVYLQDKNSFFHYDSHSRSNSIHAKQVA    |

|        |                                             |
|--------|---------------------------------------------|
| Q16637 | DFKRETCVVVYTYGNREEQNLSDLLSPICEVANNIEQNAQ    |
| P52793 | EHQEYVACQPQSKDQVRWNCNRPSAKHGPEKLSKFRFTF     |
| P27548 | RRQFEDLVKDI TLNKEEKKENSFEMQRGDEDPQIAAHVVSE  |
| Q8IYI0 | DLPSACDIRDYVLQGPSQEANSEAFSSLEFHSFPYSSDVDP   |
| Q80X71 | DAEKRTIYLNITNTLNITNNNYYSVEVENITAQVQFSKTVI   |
| P14415 | TGQPCVFIKMNRVINFYAGANQSMNVT CAGKRDEDAENLGN  |
| Q5VWZ2 | RILIGGFSMGGCMAIHLAYRNHQDVAGVFALSSFLNKASAV   |
| P15374 | FMKQTI SNACGTIGLIHAIANNKDKMHFESGSTLKKFLEES  |
| Q5SZD4 | RYIANLISCFPSVCRDEKGNPVWSITDQFATMCHGYTLP     |
| Q8BZJ7 | SVDQKKLEQLYSRYKDPQDENKIGIDGIQQFCDDLSLDPAS   |
| P10417 | PFTARGRFATVVEELFRDGVNWGRIVAFEFEGGVMCVESVN   |
| P01213 | GSFLKELEKSKFLPSISTKENTLSKSLEEKLRGLSDGFREG   |
| P29218 | VYSCVEGKMYTARKGKGAFCNGQKLQVSOQEDITKSLLVTE   |
| P15949 | WVLTAACHCYEENKVS LGKNNLYEEEP SAQHRLVSKSFLHP |
| P51572 | EAFKKQAESASEAAKKYMEENDQLKKGAAVDGGKLDVGNAE   |
| Q9R1Q6 | YSDDSDWKTERCREYLNMMMLFLAF CIMLTVVCILEIVVS   |
| P52793 | CLKLKVTVNGKITHNPQAHVNPQEKRLQADDPVQVLHSIG    |
| Q8CDN6 | EDDIKEDGIVPLRYVKFQNVNSVTLFVQSNQGEETTRISY    |
| P00756 | NWVLTAACHYDDNYKVWLGKNNLFKDEPSAQHRFVSKAIPH   |
| Q64669 | LETVWEETFLYFAPSSFLDLNFQAGFLMKKEVQEEQKKNKF   |
| O75489 | KTYTDELTPIESAVSVFKAANWYEREIWDMPGVFFANHPDL   |
| Q9Y478 | RPTVFRWTGGGKEVYLSGSFNWSKLPLTRSHNNFVAIDL     |
| Q9QWZ1 | LLKPSTKALALSCKVSI RTDNRGFLSLQYMI RNEDGQICFV |
| Q3KNK3 | ENMKIGDTILFRGPTGRLFYNEPGTLLIKANKTSEPEKKLV   |
| O95750 | LLQYSEEDCAFEEIIRPDGYNVYRSEKHRLPVLSLSAQQRQ   |
| Q2KIN3 | YKSEVHKASLI IDLFGNEHDNFTKNLENLMSTIQESYCSNW  |
| P07306 | IGSQNSQLQEBLRLRETFSNFTASTEAVQVGLSTQGGNVG    |
| O35658 | SLDWALYDHLMDFLADRVDNTFADELVELSTALEHQEYIT    |
| Q8BHC1 | SITRAYYRNSVGGLLFDITNRRSFQNVHEWLEETKVHVQP    |
| Q91VE3 | IDGYKCKEGSHFPQVALLKGNQLHCGGLVDKYWVLTAAHC    |
| Q07507 | ECWWEI INRAGMEWYQTC SNGLVAGFSRYFESVLDREWQ   |
| O35723 | SAEAI RKAYRKLALKWHDPKNPEHKEEAERRFKQVAQAYEV  |
| P09586 | ALLLAVSNLLVWEKVTSLPNYRLPTESLYQRVIVVSHNAH    |
| P53674 | IKMDAQEHKISLFEGANFKGNTIEIQGDDAPSLWVYGFSDR   |
| Q9UPY8 | DGKDYNPLLARQGQDVAPPNPGDQIFNKS KKLIGTAVPQR   |
| Q0VD01 | AQRMNRRRHEVGALVRACKANGVTDLLVVEHRGTPVGLIV    |
| P49863 | TSDPQSNDIMLVKLTAAKLNKHVKMLHIRSKTSLRSGTKC    |
| Q8R2Y9 | PTAPQATTGPPAASPASENQNGNGLSTQLGVPVGGPHPSHTP  |
| P52843 | IGPDEL DLVLKYSSFQAMKENMSNFSLIKEDQVTNGLKLM   |
| Q78IS1 | LLLLRAEPLRSAELTFELPDNAKQCFHEEVEQGVKFSLDYQ   |
| Q99390 | MQTEDIISVINWAEKQECIDNQRIGLWGTSLGGGHVFSAAA   |

|        |                                             |
|--------|---------------------------------------------|
| Q47098 | GSALARASRWNRI PDYLQKANDQMCVVLQIETREAMKNLPQ  |
| Q9DCT5 | TVCERGTPIKCGQPIRLTHINTGRNLHSHHFTSPLSGNQEV   |
| Q8NDB6 | QEGPAPSQFSYSEQPMMGLSNLSPGPGPSQAVPLPEGLLRQ   |
| Q9UKR8 | PRSCCKSIGSVSCDGRDVS PNVIHQKGFHLLKITKTQSF    |
| Q9CPY6 | DVDRKHGKFLAFYQYAKSFNSDDFDYEELKNGDYVFMRWK    |
| A1E959 | PLIPQRLMSASNSNELLLNNGQLLPLQLQGPLNSWIPPF     |
| O35403 | YYLVPKGLKDKKAKILYMYRNPKDV LISYFHFNSMLLIFQN  |
| Q9Y4Z2 | QRRSRRKKANDRERNMHNLSALDALRGVLP TFPDDAKLT    |
| Q3UV48 | NIAESIQLASLQIFIAESNNIHSFPRSLCLVTSLELLNLN    |
| Q8R4X1 | RAKMSSIFAYQSSEVDWCESNFQHSELVAEFYNTFNSVFLL   |
| Q8BV13 | RNQLLEVDFCIGRDIRKDDINNIVKTLHEWCDGCEAVLLGI   |
| Q9UKR3 | SGWGTTTSPQVNYPKTLQCANIQLRSDEECRQVYPGKITDN   |
| Q96CF2 | KKMTNIRLPNVPSSSLPAQPNRKPMSSTARRSRAASSQRA    |
| Q7Z4M0 | PGPCLEAGTAPCPTWKVFDSEESGYLVLTIVISGHFFIFQ    |
| Q8NH89 | SNKINHFFCDGLPILALSCSNIDINIILDVVVFGFDLMFTE   |
| A5PJG7 | TGAKAANKENLDPSNLMPPPNTAPDQPFPLSTVREESSI     |
| P53004 | RYLSFHFKSGSLENVPNVGVNKNIFLKDQNI FVQKLLGQFS  |
| Q5SX19 | HANGTDLVVTFDAEGVSGHSNHIALYKAVRALHSGGKLPKG   |
| P82970 | EAKITEAPASEKEIVEVKEENIEDATEKGGEKKEAVAAEVK   |
| Q9CQD1 | MNVNEIFMAIAKKLPKNEFQNP GANSARGRGVDLTEPAQPA  |
| Q53HL2 | VEIRIKQIESDRQNLLEKVDNLYNIEILRLPKALREMNWLD   |
| O75323 | EVLPKIHEDKHYPCTLVGTWNTWYGEQDQAVHLWRYEGGYP   |
| Q8TBZ9 | HVKDETVFFIQQMKIIVISHNIPMRLFMQWHVSVIKVPVMI   |
| Q5TGL8 | SEVVLTFFERSPLDQVLKNDNVHKIQPSFQSPVKISEIMRS   |
| A5D7N9 | ASQEDTNCILLRCVTCNVSVNEEQILSKRKNENGCILETLY   |
| Q91X79 | MVNGQYAVHGVTSFVSSMGCNVARKPTVTRVSAYISWMNN    |
| P0CG30 | ELFLDLVSQPSRAVYIFAKKNGIPLRLTVDLVKGQHSKE     |
| Q7L2Z9 | QKTLKAPTQKEILALIPQNALLKDLIDLHNSSQMKSMT      |
| Q9TT89 | AAGYGLEPSSFNMHCAPFEQNLGVC PGDSAKAAGAKEQRD   |
| Q58CY6 | GELYLDESKQFYKELGFKRYNSLSILPAALGKPVREVAACA   |
| A6QPM6 | EPGLDLSLSPRSESPGRGRPNCS PGRRKGRADRRGGARKGR  |
| P47756 | KLTSTVMLWLQTNKSGSGTMNLGSLTRQMEKDETVSDCSP    |
| Q58DS5 | AFSSLARDILLKSGRRRLKNNNKPSTDLKTC DKKNTNKCS   |
| Q3UMZ3 | DSKQACLAASLALALNGVFTNI IKLIVGRPRPDDFFYRCFPD |
| Q9QWZ1 | QITVSPDKPYFRLSTFGNAGNSHLDY PKDSDLVEAFHCDKT  |
| P35288 | EGLAKRLKRFYRTSVKEDLVSEVFKY LAEKHLQKLKQQI    |
| P14207 | IQDTCLYECSPNLGPWIQQVNSWRKERFLDVPLCKEDCQR    |
| Q99865 | TKKKVSQKKQGRPSSQPRRNIVGCRISHGWKEGDEPITQW    |
| Q3SZ45 | VSAFGEEGEGDYLDWTVLCNGPYWVRDGEVRFKHSSTEVL    |
| Q91WK7 | QIVQLLLDHGADPNQQDGLGNTPLHLA ACTNHVPVITTLR   |
| Q3ZCA1 | GRVVNSWYRYRPLVAELVVQNACGHLGLKSEEICWTNSESF   |

|        |                                             |
|--------|---------------------------------------------|
| Q8BZ09 | LGFQGLNKGLTATLGRHGIFNMVYFGFYHNKNIIPSSKDP    |
| Q9D853 | DYSPSAIKLSASILEKEGLSNINLKVEDFLNPSTKLSGFHV   |
| Q9ESN4 | TYHVLMRGGDGTSMWADLCKNNQVRASATAQDADQNYDYAS   |
| P70245 | CWFAVCTFIHLVIEGWFSLYNGILLEDAQFLSQLWKEYSKG   |
| Q9D0M0 | ANATPEFEGRGGDDLGETEIANNTLYRIFNNKSSVDLRSLCIS |
| Q5JTZ5 | LPKGNTTAPAESMVNAVWINKERRSSLSLEADSEVEGRL     |
| P21796 | KLDLTKSENGLEFTSSGSANTETTKVTGSLKTYRWTEYG     |
| P05631 | RAGVAGLSAWTVQPQWIVRNMATLKDITRRLKSIKNIQKI    |
| Q9UBY8 | LYLPHLTLFLVGLALLTLIINPYWTHKKTQQLLNPVDWNFA   |
| Q8IUE1 | SEEEKQMLSEKTNLSLLQISNWFINARRRILPDMQQRRND    |
| Q96S44 | TVRDYIQSTMETEKTPQGLSNLAKTIGQVLARMHDEDLIHG   |
| Q96CS7 | QAYAVPYQYPYAGLYGQQPANQVIIRERYRDNDSDLALGML   |
| P29368 | DGERGRLVPAMQTEDIISVINWAEKQECIDNQRIGLWGTSL   |
| Q7Z2W9 | VVLDPDVEETRHHAEVVKVNEMIVTGQYGRLFVAVVHFASR   |
| Q8BRJ4 | VGGTLLFALRYRVTGREFDWNNNGRDYALLGPEHPAGAGAA   |
| Q29438 | PCSPCNPCNPCSPCSPCSPCNPCDPCNCPYPCGSRFSCRKM   |
| P15947 | AQHRLVSKAIPHPDFNMSLLNEHTPQPEDDYSDMLMLRLK    |
| Q32PI9 | PPFKDRVSWAGDLDDKASININEMQFIHNGTYICDVKNPP    |
| Q05433 | KGAEEGISLQSRPDGRTMLVNTTPYIFAIGSLDNGKRIA     |
| Q9HAE3 | DDMIMDRVFRGFDKNDGCVNVLEWIHGLSLFLRGSLEEKM    |
| P31268 | SPLYQSPFASGYGLGADAYGNLPCASYDQNI PGLCSDLAKG  |
| P48758 | ELQQKFRSETITEEELVGLMNKFVEDTKKGVHAEEGWPNSA   |
| Q969X5 | LFILFLFLSELTGFITTEVVNELYVDDPKDSDGGKIDVSLN   |
| Q9JKT4 | GLGLGNTFIALVNCMDWAKNNKLSMTGFLLI GLATSRIFI   |
| Q9P299 | SSYENELMMSVLTCLFESLNHMLRKNVEKRWLENMDGAF     |
| Q6ZTZ1 | AAEGPGYLVSPQAEKRRARNWTD AEMRGLMLVWEEFFDEL   |
| Q6PHZ8 | ESISAQLEEASSTGGFLYAQNNTKRSIKERLMKLLPCSAK    |
| Q6PEX7 | PDVLWDLDIPEGRSHADQDSNPKAEAPLQPALQLAPQQP     |
| P00551 | QAQSRMNNGLVDASDFDDERNGWPEQVWKEMHKLLPFSPD    |
| P81623 | ASSDDLVAEVGISDYGDKLNMESEKYKLDKENYPIFYLF     |
| Q68D42 | VFLVFGFMFTVSGMKGETLGNIPLLAIGPAICLPGIAAIAL   |
| Q9Y294 | VLITCTYRQEFIRVGYVNNNEYTETELRENPPVKPDFSKL    |
| Q8N2U9 | TLGFLAVLTEAMLGVPQLYRNHRHQSTEGMSIKMVLMTSG    |
| P61267 | DIKMDSQMTKQALNEIETRHNIEIKLETSIRELHDMFVDMA   |
| P62070 | FQRQILRVKDRDEFPMILIGNKADLDHQRVTOEEGQQLAR    |
| Q9D676 | EQILINKTYAACPKNWIGVGNKCFYFSEYTSNWTFAQTFCM   |
| O43423 | LRKLELRVSGGLEVLAEKCPNLTHLYLSGNKIKDLSTIEPL   |
| P46638 | YRGAVGALLVYDIAKHLTYENVERWLKELRDHADSNIIVIML  |
| Q9DCT2 | IADLTAVDVPTRQNRFEIVYNLLSLRFSRIRVKTYADELT    |
| Q9H160 | SSRRPRRQRTSESRLCHMANGIEDCDDQPPKEKKSASAKK    |
| Q9NQ35 | NLSKLRSGPRVPWASKTNKLNQAKSEGLKKSSEDDMILVSC   |

|        |                                               |
|--------|-----------------------------------------------|
| Q9H6H4 | IVQAKERSYETVLSFGKRGLNIAASAAVQAATKSQGALAGR     |
| Q9ESN5 | IRGIKEFKKLLTLGAFLDNHFPLPEASTPKKRKNIQDSN       |
| P20108 | YGVLLESAGIALRGLF IIDPNGVVKHLSVNDLPVGRSVEET    |
| Q0VCT9 | GMGQFPPSHHHQQQPQHAFNALMGEHIHYGASNMNASSGI      |
| Q8IWL3 | IPERTDYEMDRQFLIEIMEINEKLAEAESEAMKEIESIVK      |
| P18917 | DEQYAQGKEYFINVSDKCHTNSLHLPEDMQHNPTDEQGLI      |
| Q9H160 | QETLKEIDDVYEKYEKEDDLNQQKRLQQLLQRALINSQELG     |
| Q9NP95 | GSEKLTSECI FREQFEENWYNTYSSNIYKHGDTGRRYFVAL    |
| A6QL48 | LDVKQGLGGVEVSPQVEAVLNLLSAPGSLKLVPRPKALLDNC    |
| Q99807 | ISRAAVDRIIRVDHAGEYGANRIYAGQMAVLGRTSVGVPVIQ    |
| O54917 | LVDPAQETVRRRCRDPINVENLLPSKIRINLEENVQYVSMR     |
| Q3T0E2 | LFQQWDIDMQAAEQEELANLFRQQQKVFQQSRIVQSQRL       |
| Q68D42 | ASSINSPTPTEEGECQSLVQNGHQEETSRYLDGYCPSGSSL     |
| Q3T054 | FEKKYVATLGVEVHPLVFHTNRGPIKFNVDWTAGQEKFGGL     |
| Q15181 | YKGYIWNYGAI PQTWEDPGHNDKHTGCCGDNDPIDVCEIGS    |
| P25731 | KPEKQDGLSKNKS LKTDL SVNIIYAALIRVLPKDGKSDMRA   |
| P68252 | QKARLAEQAERYDDMAAAMKNVTELENEPLSNEERNLLSVAY    |
| A6NCJ1 | AWEAWYNLPRAPASPFREAYNRWHSCYQHRECSMPSAYTQH     |
| A7E1Z1 | PGIAAIALARKTEGCTKWPENELLWVRKLPFCFRKPKDKEVV    |
| P32442 | GTIANETEKSSRRKKERSDNQENGGGKPEGSSKARKERTA      |
| B4E2M5 | DWDAKKRELELSPLSNQNMNKNKKS RGPTRPSNTKGRRV      |
| Q92915 | AREQHWRDPSASRRRSSPSKNRGLCNGNLVDIFSKVRI FGL    |
| Q2T9X7 | ELAEITLDP PNC SAGPKGDN IYEWRS TILGPPGSVYEGGV  |
| Q9H3H3 | AWLAKYPPSQVTRYGDPGSPNSEPVGWIAVYQQGYSPNSGD     |
| Q8BFR6 | MFFCLRWSIGKVVDFAASLANLRNENNKLTAKKLRKLVHPS     |
| Q92564 | KYKVINKDQWCNVLEFSRTINLDLSNYDEDGAWPVLLDEFV     |
| Q91XB7 | PAPGADVAFSVNLLGDPVANMAMAYGTSIASQKDIVHKE       |
| P22090 | TGNLCMVI GGANLGRVGVITNRERHPGSFDVVHVKDANGNS    |
| P59529 | NLPKNNSLILRLQQFEWYFSNPLKMIGFGIPFFVFLAS IIL    |
| Q96LT6 | NLCTVFGILLGYPVPTFHLNQDDNCLALTPLRVFTARIS       |
| C9J302 | PPNYGKYCVRPKKPAQEALINYSRRGKGVLLKHLHGRCDSSES   |
| P15814 | LFPPSSEELQANKATLVCLMNDFYPGILTVTWKADGTPITQ     |
| P0CH99 | KCYECDKSGKAFSQSSGFRGNKIIHIGEKPHACLKCGKAFS     |
| Q5E9E6 | AVGHVKMTDDELVYNIHLAVNFLVSLKKNWQNVRALYIKS      |
| Q9HBM6 | NPSMIGPKNILITTNMVSSQNTANEANPLKRKHEDDDDDNDI    |
| Q9NVS9 | PSARMLLLKGFKGDFRFFFTNFESRKGKELDSNPFASLVFY     |
| Q32LD3 | GLSIIASYSRVCRTYLCNNLTNMNAILHLKARTPKTLKSSSH    |
| Q3T0Z7 | GLPPGAAAVALLPVTLDTPVNRKSMPEADFSWTPLEFLVE      |
| Q86VX2 | SELEKVGSI FLQLKLVVKKGNQ TENVYI BELTLPQFYSFLHE |
| Q9BR61 | VKKLDPGWN PQIPEKKGKEANTGFGGPV ISSLYHEETIREE   |
| O08545 | GGGAEQYVLYMVNLSGYRTCNASQGSKRWECNRQHASHSPI     |

|        |                                             |
|--------|---------------------------------------------|
| Q9Y6H3 | AMKHSGCAVNRDRHFSCEDCNGNVSGGFDASTSQIVLCQNN   |
| O00299 | LCPGGQLPFLLYGTEVHTDTNKIEEFLEAVLCPPRYPKLAA   |
| Q8K2Q2 | KSKPDWYYTKHFFGQIPVLENSQCQLVYESVIACEYLDVVY   |
| O35129 | PSMYQRLGLDYEERVLPSIVNEVLKSVVAKFNASQLITQRA   |
| Q9BYD2 | EDTKHRPKENLELILITQSVENVGVRGDLVSVKKSLSGRNRL  |
| Q9DAS4 | KKKEIFPSWELLSFLKSSSRNSKFLAMFNLSHCLEYDTQFF   |
| O15318 | VLKKMEELEKRGDGEKSDEENEEKESKEKSKEGDDDDDD     |
| Q8VE04 | RKFEPGTQRFELHKRAQASLNSGVDLRAAVQLPNGEDQNDW   |
| Q91YJ3 | VGLMKIVKEAYPDHTQFEKSNPHYDPSKEDDPKWSMVDVQ    |
| Q00059 | KPVSSYLRFKSKEQLPIFKAQNPDAKTTELIRRIAQRWRELP  |
| Q86UD7 | LAVRGRAWSLLLDIDRIKSQNPGKYVMKEKGKRSRI IHC    |
| P25393 | EKIIESIYISSVSFFSDKVRNVIEKDLSRKWTLGI IADAFN  |
| Q64362 | PKNALPIAKPTSPAPAAQSTNGTHASYGPFYLEYSLLAFT    |
| Q15404 | GFGSLPALEVLDLTYNNLSENSLPGNFFYLTTLRALYLSDN   |
| Q7RTV5 | FDFQGDPAQQGGTLILGPGNNIHF IHRDRNRLDHKPINSVL  |
| Q1RMR0 | VERYSDKYQMSGPIDNAIDWNPDWRRPRELKI RVRKLQKE   |
| P82970 | D TSAQAVAETKQEAVVEEDYNENAKNGEAKITEAPASEKEI  |
| O43704 | TVMDHKSFPFMRKGTAGDWKNYFTVAQNEKFD AIYETEMSK  |
| O95157 | HSPPPSAKVKKIFGWGDFYSNIKTVALNLLVTGKIVDHGNG   |
| Q9BS92 | FHIWKYDNFAHRAEVRKALANCKEWQEQSII PNLARIDKQE  |
| Q9ZIS7 | IFNYASVFIMLIEYVEGVELNDMPII PENVKAEIKASMEKL  |
| P32243 | REEVALKINLPESRVQVWFKNRRRAKCRQQQQQQNGGQNKV   |
| Q9P013 | QKAEERIRMENILSGNPLLNLTGPSQPQANFKVKRRWDDD    |
| P11226 | IKKWLTFSLGKQVGNKFFLTNGEIMTFEKVKALCVKFQASV   |
| Q5E982 | QNGMHTLCLLDIKVKEQSLNLIKGRKRIYEP PPRYMSVNQAA |
| Q8N4L2 | QSLINLDGKHLHQHVVKCTVCNEATPIKNPPTGKKYVRCPCN  |
| A6H789 | SMCPKGCLCSSSGGLNVTCSNANLKEI PRDLPPE TVLLYLD |
| P49755 | LLLFLGPRVLVAISFHLPI NSRKCLREEIHKDLLVTGAYE   |
| Q8BHE1 | RCEEELESDSDDEVECDLSNMEITEELRQYFAQTERHREE    |
| P11843 | TIYDQENFQGKRMEFTSSCPNVSERNF DNVRSLKVECGAWV  |
| Q3MHX1 | FMTLGLSEEKAIYFSEKWKQNAPTLARWAVGQTLMINQLVD   |
| Q91YY4 | MGPSIPTQTREVLTSHLSSYNMWALQGIEFVVAQLKSMLLT   |
| P49638 | FSMIKPFLTEKIKERIHMHGNKYQSLLQHFPDILPLEYGG    |
| Q8TED1 | DAKGRTVSLEKYKGVSLVVNVASDCQLTDRNYLGLKELHK    |
| Q8WVL7 | TGTQSLWVGNSDEDEEQDDKNEEWYRLQEKKMEKDPSRLLL   |
| Q80ZQ3 | RDYQKQFNVTHLLALCDYSHNTFIRHYRLYQYVLSQDQEVN   |
| A4QPB2 | DEVWAIRRAYLDGSGAQTLINTKINDPDDIAVNWVARSLYW   |
| Q0VC33 | YKVEQDDWLTVYLKYLFI FNFFWVGGAAVMAVGWVTLVE    |
| Q969E2 | CGYVCWFRPVYKAFRADSSFNFMAFFFI FGAQFVLTVIQAI  |
| Q9Y6N1 | FEAGQYFNKIQCFCFEEQRLNPQEEVDMPVFFYIDPEFAED   |
| P17483 | EPGQRCEAVSSPPPPCAQNPLHPSPSHSACKEPVVYPWM     |

|        |                                              |
|--------|----------------------------------------------|
| P04229 | LLVCSVSGFYPGSIEVRWFRNGQEEKAGVVSTGLIQNGDWT    |
| P0C7T8 | ELRRAPRLWKVRAMMIFNTFNLILGFIVVVVEVMKTALGPA    |
| Q17QL1 | PESYHSYMWNFFKHIDIDPNNAILDGNATDLQAECDAFE      |
| Q8QZ28 | LVIGDLGVGKTSIIKRYVHQNFSSHYRATIGVDFALKVLHW    |
| P18021 | WYVSQLQTMVATLKIPEMERRNKRTGRTEKARIWEVTDRTVR   |
| Q2KIS7 | FSLLTQVTAETPTPKAKKAANAKKDAVSPKMLEELKTQLDS    |
| Q9D7L8 | QLLLVLSLPLQGRTSSVLTVNGRTEYI LDTHQGVQASLEC    |
| P01033 | AGKLDGLLHITTCSEFVAPWNSLSLAQRGRFTKTYTVGCEE    |
| O35969 | YDTYPLSEEAWHTHQFNFIKNHAFRLKTKGGVLTTCNLTSW    |
| Q96G30 | EEELNRLMKFDIPNFVNTDQNYFGEDDLI SEPPIVLETKP    |
| P48023 | VYFRGQSCNNLPLSHKVYMRNSKYPQDLVMMEGKMMSYCTT    |
| P32972 | LKSTPSKKSWAYLQVSKHLNNTKLSWNEDGTI HGLIYQDGN   |
| Q9H6K1 | IGEGESIPPDTPQFVKTWRIQNSGAEAWPPGVCLKYVGGDQF   |
| P09496 | PGPQPHGEPGGPDAVDGVMNGEYYQESNGPTDSYAAISQV     |
| Q8K1I3 | ESNSSEEMMFGDMARSHRRRNDYLLGFLSDESRSEQFRDRS    |
| Q29438 | ELAKLRRRTNRILASSCCSSNILGSVNVCGFEPDQVKVRVK    |
| Q80V24 | ISPSKRKFSMEPGDKDLDCENDHVS KMSRIFSPHLNKTVNG   |
| Q2HJI8 | YRGAMGIMLVYDITNEKSFDNIKNWIRNIEEHASSDVERMI    |
| Q8R0F8 | LEEGDLILTGTPKGVGPIKENDEIEAGIDGVVSMRFKVKRS    |
| Q80ZS3 | EQAWVQLKEQEVKLQEEAKNFITRENLEARIEEALDSPKS     |
| D3Z1Q2 | TKTGAPHQDNAESSERRFRMNSFVSDFGKPLESDKVF SRQG   |
| Q8CEZ1 | EHYAANVRRMYTKDVSFMITNMVKNQALQDGLLRAVQI IEK   |
| A6QPA3 | PGLVVHGEAAPFSTALRSLVNNPLYSDRVFVVGQERQEVFA    |
| Q9NW81 | EVPVEAVDAGDCDINYEGLDNLLRLKELQSLSLQRCCHVDD    |
| Q0II87 | KPMTSYVRFKSKEQLPIFKAQNPDAKNS ELIKKI AKLWRELP |
| Q9GZW8 | SFTPKGITIPQREKPGHMYQNE DYLQNLPTETTTLGTVQI    |
| Q9D0Z3 | EAGKQQPVVILLGWGGCRDKNLAKYSAIYHKRGCIVIRYTA    |
| P62593 | AFLHNMGDHVTRLDRWEPELNEAIPNDERDTMPAAMATTL     |
| Q14249 | FLPRTEADGKSYVKYQVIGKNHVAVPTHFFKVLILEAAGGQ    |
| P04227 | TWLRNSKSVTDGVYETSFVLVNRDHSFHKLSYLTFFIPSDDDI  |
| Q2TBT8 | CPNEGCMLRVPRGALDEHRQNCQH GAYHRCSLGCATLGPV    |
| Q8NHR7 | IRTPVVEKQMYFPLQNYPVNNMVTGYISIDAMKKFLGELHD    |
| Q2KIS9 | ELQEELKCCGLVNGASDWGSNFQHY YRTCECPSES DSSCTK  |
| Q3SZY7 | HSQVPMLCSTGCGFYGNPRTNGMCSV CYKEHLQRQNSSNGR   |
| Q9DCY0 | QQIQTLEKLGPFMYAHVDKANFTVQRMVGLLQIILLPCTWN    |
| Q8WTT0 | WVDQTPYNENVTFWHSGEFNNDERCAI INFRSSEEWGWND    |
| P23150 | GQLTSFDPQGGLEIATGKYNLEILIKDSNFTPAANEAPQA     |
| Q58DC7 | IVASLLGAHTATDLPELLGNLQYNI SRNTKTKAKHLPQVK    |
| Q32KN7 | TDIPTVGKAPQSKPQPVRSKNWRQH HEDFINAIQSAKQCTL   |
| Q12918 | KCSVDIQQSRNKTTTERPGLLNCPIY WQQLREKCLLFSHTVN  |
| Q32KP7 | PQKKKLYMKQSLVVLGDHINTFLQH YCRAWEIKHWKMLW     |

|        |                                            |
|--------|--------------------------------------------|
| P97823 | IKSPHIKYICPHAPVMPVTLNMMAMPWFVDFVGLSPDSQE   |
| P48060 | WPKRGATCSACPNNDKCLDNLCVNRQRDQVKRYYSVVYPG   |
| Q810M6 | YRLMALKCFHSDPCVEESVENLPYLSDKDCSPCSKQPSSKG  |
| O15492 | LGCDTGSTGKFEWGSKHSKENRFSEDLVGWRESFDLLSS    |
| P53811 | SVAEASKNETGGGEGIEVLKNEPYENDGEKGYTHKIYHLK   |
| P20181 | KHWNSQCKTSQTYVRALTSENNKLVGWRWIRIDTSCVCALS  |
| P28033 | MRRERNIAVRKSRDKAKMRNLETQHKVLELTAENERLQKK   |
| Q99NH8 | NGSTVIADDTLAGTVTITLKNLQAGDAGLYQCQSLRGRAE   |
| P15246 | LIDQLKPGGRLILPVGPAAGNQMLEQYDKLQDGSVKMKPLM  |
| P58340 | GRDLSISDGRGRAHNRGRHNDGEDSLTHTDVSSFQTMQDM   |
| Q9WV93 | IEGLDASDPLLVRLVSHLNNYASQREAAAGHGLGHIW      |
| P14483 | SLRRLEQPNVVISLSRTEALNHHNTLVCSVTDIFYPAKIKVR |
| O60238 | EVEALKKSADWVSDWSSRPENIPPKFHFHRHPKRSVLSMR   |
| Q5EA92 | GKQTEFAPETGKREKRLTKNATAGSDRQVI PAKSKVYDSQ  |
| Q8BHH9 | NGHDFRGRCLLFTGEMWLSANLTMQGRERFTVQEWGPPAAC  |
| Q9CR78 | QIERECEMAEEHRIKMEVLNKKMYWERKLTFTKEWPVS     |
| A7MAZ5 | VSKGTLVQTKGTGASGSFKLNKKAATGEAKPKGKKAGAAKP  |
| Q3MHP2 | RAFAEKNNSFIETSALDSTNVEEAFKNILTEIYRIVSQKQ   |
| B9EJG8 | LVALCLASFGMTLLGNFQLTNDEEIHNVGTSLTFGFGTLTC  |
| Q9BW60 | FLMSGWLSYTWRCDPVDYSNSPEALRMVVRVWVLFVSKFI   |
| Q9UKR3 | ELQSPVQLTGYIQTLPLSHNNRLTPGTTCRVSGWGTTTSPQ  |
| Q61133 | YPADLQARAQVHEYLGWHADNIRGTFGVLWTKVLGPLIGV   |
| Q5ND56 | YGQQKGLSLLQVPFNIPLHCNMANAVLISPQLYWFSLCKK   |
| Q8IUX1 | QNIYQMATFGTTAGFSGIFSNFLFRRCFKVKHDALKTYASL  |
| O43711 | ASAQTPHPHEPISFGIDQILNSPDQDSAPAPRPGDGASYLG  |
| Q17QQ4 | MPTSQSPAVKASIPATSAVQNVLINPSLIGSKNILITTMV   |
| P17677 | SSEEKAGSAETESATKASTDNSPSSKAEDAPAKEEPKQADV  |
| P70377 | QQSGRGWYLGLENKEGEMKGNHVKKKPAAHFLPKPLKVAM   |
| Q9ES30 | SLATHFSNQNSGIFSSVETNIGNFFDVTMGRFGAPVSGVY   |
| Q3ZC64 | CLRLKVMIAGKITHSPQAHNAQEKRLPADDEPVQVLHSIG   |
| Q8BGX2 | VDFPGRILDVGFVGRWWILQNRMHDCDINDDEFLLHLPALHR |
| Q6FIF0 | GFECRCGNVYCGVHRYSDVHNCSYNYKADAAEKIRKENFVV  |
| A6H789 | IDEHAFKGAETLQTLDLSDNRIQSVHKNAFNNLKARARIA   |
| B6A8C7 | KPLDSTEGAAEFHLNNLKVRNAGEYTCEYYRKASPHILSOR  |
| P0C7V9 | ERGSSLRKDGPLDIRMDGGRNISSLCYLYTERLTTAIYLYC  |
| P19427 | TECWWEIINRAGMEWYQTCNNGLVAGFQSRIFYESVLDREW  |
| P29692 | KIWFDFKDYDAERRFYEQMNGPVAGASRQENGASVILRDI   |
| O54908 | LCSLPLLGASATLNSVLINSNAIKNLPPPLGGAGGQPGSAV  |
| Q08D99 | IFCSAYLYKQSFAPGSSFLNVLAGALFGPWLGLLCCVLT    |
| Q5NCY3 | RTPRGRFVHIPPLPRSDWANDFGVPWWKGANYPVGRLSAR   |
| Q9NXJ0 | NQANTTTNMSVLVIPNMYESNPVTPASSAPPRCANNYSANA  |



|        |                                             |
|--------|---------------------------------------------|
| Q9JKF4 | FWHPHEPNLPEERCVSIVYWNPSKWGWNDFCDSEKHNICE    |
| Q9BZM6 | LHYDCVNHKAKAFASLGKKVNVTKTWEETETLRDVVDFLK    |
| Q92913 | QQSGRGWYLGLNKEGEMKGNHVKKNKPAAHFLPKPLKVAM    |
| Q96KN4 | TPCPESPSRHHHLLHQLVLNETQFSAFRGQECIFSKVSGG    |
| Q9BPX1 | KALALDESPYGVVNCISPGNIWTPLEELAALMPDPRATI     |
| Q2T9Q7 | GQDLWEESWSNQRWSRTAPNPRGARARSLARGRSEASPEN    |
| P08962 | EVAAAIAGYVFRDKVMSEFNNNFRQQMENYPKNNHTASILD   |
| P97372 | EMETDKQEKKEVPCGYLFGNEKLLALLALVKEVWTLKEK     |
| P01193 | EHFRWGKPVGKKRRPVKVYPNVAENESAFAFFLEFKRELEG   |
| Q9NRE1 | HDMKPSAVKDSIYNAVSIWSNVTPLIHQVQVQNGDADIKVSF  |
| Q8IUQ4 | NCRPKLTCCTCRGPLGSIRNLAMEKVANSVLFPCYASSG     |
| Q9BGI2 | HLSKAKISKPAPYEGTAVINGEFKELKLTDIRGKYLVEFFF   |
| P04179 | EKLTAAASVGVQSGGWGLGFNKERGHLQIACPNQDPLQGT    |
| P20826 | CIYLQLLFLNPLVKTKKEICGNFVTDNVKIDITKLVANLPNDY |
| P13366 | NARVKPGDVCSVAGWGKTSINATKASARLREAQLIQEED     |
| Q92904 | VKIITDRGTGSKYGFVSFFNDVDVQKIVESQINFHGKLLK    |
| Q8VCC1 | RKVVDFHGRDLILVNNAGVNNNEKNWEQTLQINLVSVISGTY  |
| Q9HD15 | QAEVEMAELYVKPGNKERGWNDPPQFSYGLQTQAGGPRRSL   |
| Q24K21 | DTKMSFQWRIRNLPYPKDVYVNFVDQKERCVVVRTNKKYY    |
| Q14C20 | CQQPGLSLWVPFQNAATAVTNLYKESVDTHQRSFDIGIQIG   |
| P28907 | NGSRSKIFDKNSTFGSVEVHNLQPEKVQTELEAWIHGGRED   |
| P39687 | LELSDNRVSGGLEVLAEKCPNLTHLNLSGNKIKDLSTIEPL   |
| Q9HAV7 | LVMTEVQIQKVFTHGLLKLNFVGAKFDPYEHEALFHTPVE    |
| Q9BS16 | EEFQKLRQDLEMVLSKESKNEKLEDLREQRWLDEQQOI      |
| Q99LJ8 | QQQELGQDCSKYSAEFANSNDKDDQDLNCPASVKVLSPED    |
| P09326 | MPHNYSRCYTCQVSNVSSKNGTVCLSPPECTLARSFGVEWI   |
| Q0VD18 | DTSNPNCVVIADAGEGFSYQNMNKAQVLMELNPVLFSLG     |
| O18870 | FLPPPPHMPRSGLGPKSGLNFGPPPPPPPPHFLSRWLP      |
| Q8JZV9 | QKSGNIINMSSVASSIKGVENRCVYSATKAAVIGLTKSVAA   |
| Q99LZ3 | SEEMVLTPAELIEKLEQAWMNEKFAPELLESKAEIVECVME   |
| Q9JIW9 | EVQIDILDTAGQEDYAAIRDNYFRSGEGFLLVFSITEHESF   |
| Q8BN57 | KEDSALFCYLLVKNKGGYFNVNLNEEILRRGLGKTVLVKGLN  |
| Q9HB71 | GSSKVKTDTVLILCRKVENTRWYLTQVEKECKEKEKPS      |
| Q6UWP2 | ILSMFSAIRSQHSQVDICINNAGLARPDTLGSGSTSGWKDM   |
| Q12962 | PGPAPPVSAPAALPSSTAENKASPAGTAGGPGAGAAAGGT    |
| P47804 | SISPKLQMVPAIAKMVPTINAINYALGNEMVCRGIWQCLS    |
| Q46668 | VPSPDEPGLPLPGPALPTNGAIPPEPGTAPAVSLMND       |
| Q4G0S7 | LLKVMQAREVSIKEECATLHNIKGLQQTIEYQQNLKGENE    |
| P17081 | KCVVVDGAVGKTCLLMSYANDAFPEEYVPTVFDHYAVSVT    |
| Q8C8S3 | SAGLWIVYFIAVEDDKILPLNSAARKSGAKHAPYISFAGDD   |
| Q9ESK4 | SSRRPRRQRTSESRLCHMTNGIDDCDDQPPKEKRSKSAK     |

|        |                                             |
|--------|---------------------------------------------|
| Q96FV3 | GILAFVFKDWIRDQLNLFINNNVKAYRDDIDLQNLIDFAQE   |
| Q61133 | TVDILKGQHMSEQFSQVNCNKPVLKDGFSVLTTESTAILI    |
| Q64329 | KIFQYNQHKQEINETLNHHHNCNMQRANLKEEMLTNKSI     |
| Q14696 | PTEKETEEITSLWQGSFNANYDVQRFFIVGSDRAIFMLRDG   |
| P18669 | DQLPSCESLKDTIARALPFWNEEIVPQIKEGKRVLIAAHGN   |
| Q9Y3A2 | KKIERLKSELHLLDFQGGKQONKHVFFDTKKEVEQFDVATH   |
| Q8N9N7 | SMLPQSILSDSQICLLAVEGNLFEIKKLRELEGYDKYMERF   |
| P49888 | EKCKEDVI FNRIPFLECRKENLMNGVKQLDEMNSPRIVKTH  |
| Q2TBL9 | LGNPANYPVSI RFGRPRLTSNEKMLASMFHSLFAIGSOLS   |
| P02663 | INPSKENLCSTFCKEVVRNANEEYSIGSSSESAEAVATEE    |
| Q80YT9 | YGRPINVQYRFGSSRSSEPANQSFESCAKINSHSFRNDEMA   |
| P97823 | DPLVPLMFGSLTVERLKALINPANVTFKIYEGMMHSSCQQE   |
| P00848 | NITAGHLLMHLIGGATLVLMNISPPATITFTIILLLLITILE  |
| Q9DC58 | FNLVSLALGLVGCIGMGIVANFQELAVPVVHDGGALLAFVC   |
| O43396 | ITVAFNQPVKLYSMKFGQFDNGQGPKYVKIFINLPRSMDFE   |
| P15319 | EFETVMLS PRSEQTVKSANYNTPYLSYINDYGGRPVLSFIC  |
| Q32KU2 | TSTVKPGTICMLSGLDWSQNNNGRHPDLRQNL EAPVMSDTA  |
| Q9BX0  | KVIERAAFRRLWERVRLSKNYEKALEQIDENLIYWPRFIR    |
| Q9Y235 | ASRGYLEDEHAAAHAEEAFFNTILPAFPALRYNVTWYVSS    |
| P40198 | YSGRETIYTNASLLIQNVTDNDIGFYTLQVIKSDLVNEEAT   |
| Q3SX30 | MIINVLEHGSQQVSDLTNLNDYIDSEHLVDFHRVYKNSEE    |
| Q96FE7 | DQKVCEREMQRITLPLSAFTNPTCEIVDEKTVVVHTSQTPV   |
| Q9Y3B3 | DYQTHFRLREAQGRSRAEDLNTRVAYWSVGEALILLVVSIG   |
| Q8C767 | SLPEKIQSYERMEFAVCYECNGQAYWDSNKGKNYRITRAEL   |
| O95073 | DPQILQMLKEEHQIILENQKNFGLYVQEKRDGLKRRQQL EE  |
| P32850 | ISKQALSEIETRHS EIIKLENSIRELHDMFMDMAMLVESQG  |
| P55789 | PDTRTRACFTQWLCHLHNEVNRKLGKPDFDCSKVDERWRDG   |
| Q47066 | QQQLEALEKSSGGRLGVALINTADNSQILYRADERFAMCST   |
| Q3KPI0 | IQASSTTVTEKGSVVL TCHTNNGTSTFQWIFNNQRLQVTKR  |
| P08057 | ETLDDLRAHLKQVKKEDTEKENREVGDWRKNI DALSGMEGRK |
| P14435 | TLICFVDNIFPPVINITWLRNSKSVTDGVYETSFLVNRDHS   |
| Q8IXQ8 | RDDKKEVRAPSPYIMVKQDNESSSSSTSSDFAFWLEDCA     |
| Q15102 | ENGELEHIRPKIVVVWVGTNNHGHTAEQVTGGIKAIVQLVN   |
| P08294 | VVHAGEDDLGRGGNQASVENGNAGRRLACCVVGVCGPGLW    |
| Q9Y5K2 | INGEDCSPHSQFWQAALVMENELFCSGVLVHPQWVLSAAHC   |
| Q91Z38 | RMKQDKKETAITDCSKAIQLNPTYIRAILRRAELYEKTDKL   |
| Q56P03 | EDRAVQVTKKKKKKQHKIPTNDEL LYDPEKDNRDQAWVDAQ  |
| P41731 | MQNYLKDNKTATILDKLQKENNCCGASNYTDWENIPGMAKD   |
| Q8NCL8 | KLHMALYVLQALTATSQGLLNCGVYGTQHKFHQLKQEARR    |
| Q9H2A3 | SAALSSSGDSPSPASTWCTNSPAPSSSVSNSTSPYSCTL     |
| P13745 | EFEEKFIQSPEDLEK LKKDGNLMFDQVPMVEIDGMKLAQTR  |

|        |                                            |
|--------|--------------------------------------------|
| P40630 | LVKRRELILLGKPKRPRSAYNIYVSESFQEAKDDSAQGKLK  |
| Q62283 | LAVGVWGKLTTLGTYISLIAENSTNAPYVLIGTGTIVVFGFL |
| Q2KI30 | SPYTKGSSVLYRKQFVHPTLSNKEKEIDEYITQARDKSYETM |
| Q29463 | DKIVGGYTCAENSVPYQVSLNAGYHFCGGSLINDQWVVSAA  |
| Q3T071 | RKAHKQEKKKEELKNEKALRLNLIGEKLQWFQNHLDPKKVGY |
| A6QLC6 | FVIVWFGAVTITLNSKLLGGNISFFQSLCVLGYCILPLTMA  |
| Q8IYJ0 | WAIWGWPTVSREDGGDPNSANPGFLDYGFAPHLATPHPN    |
| Q4U5R3 | FPKKISELDAFLKEPDLNEANLSNLKAPLDIPVDPVKEKE   |
| Q9CZB6 | HMQFDHKKELRKLNMSTILINFLDLDLILIRSPGSIKREEK  |
| Q9WV68 | FNVSSVLYKKFFRDHGGVIVNITATLSMRGQVLQLHAGAAK  |
| Q3SWZ6 | PYTVILIERAMKDIHYSVKPNKSTKQQALEVIKQLKEKMKI  |
| Q14681 | KLIIITKELAEEGVLEEAFFYNIASLVRVLKERIRDNENRTS |
| A4D1S5 | IMAKELIARNSLHLYGESALNGLPLDSSPVLMAQGPSEKTH  |
| Q02067 | QQPAAVARRNERERNRVKLVNLGFATLREHVPNGAANKKMS  |
| P59542 | ILVVFVAVLGNVANGFIALVNVNIDWVNRKISSAEQIITAL  |
| P13765 | LLHCSVTGFYPGDIKIKWFLNGQEERAGVMSTGPIRNGDWT  |
| Q17QB7 | DNVEKFLDLACRLISEARQNTLVNNVSSPLPGEKKSISYL   |
| Q6UXX9 | MECVEGCEVGHWSEWGTCSRNNRTCGFKWGLETRTRQIVKK  |
| Q9Y235 | HAEEAFFNTILPAFDPALRYNVTWYVSSSPCAACADRIKT   |
| Q9BQQ7 | QCSSCSRNWASAQVLVLFHMNWSEKSRGQVKMRVFTQRCK   |
| A2AUU0 | FFKNRNWLLREFPEILPVNQNTKEKVGESSWDQVGSISRT   |
| Q9H213 | TTPEEASSTAQAQKPSVPRSNFQGTKKSLLMSILALIFIMG  |
| Q9GZ7  | TGAEVLKLMDAVMLQLTRARNRLTTPATLTLPEIAASGLTR  |
| Q15503 | RRGPPRASAAGLAAKVGEMINVSVSGPSLLAAHGAPDADPA  |
| O08807 | INTEVVACSVDSQFTHLAWINTPRRQGLGPIRIPLLSDLN   |
| P18181 | YNSTKTI FESEFKGRVYLEENNGALHISNVRKEDKGTYYMR |
| P11023 | YYRGAMGFI LMYDITNEESFNVAQDWSTQIKTYSWDNAQVL |
| P30039 | KLLVRLSDVYNRSFLENLKVNTENLLQVENTGKVKGLI LTL |
| Q8TCD6 | TQIVYIGDGGNDVCPVTFKKNDDVAMPKGYTLQKTLRMS    |
| Q6PKN7 | SLPPQNRMPMPQPYGDAFWENLSQRSSSNWVVEQYIPPILR  |
| P13378 | PLYSKYKAAAAAAAAAGEAINPTYDCHFAPVGGRRHAAAA   |
| Q9D1J1 | NGRRAFI GLFGDRGDAFDNFVALQDHFQKVKQCEFAKQA   |
| A1A4K8 | EVFTEMEEKYGEVEEMNVCDNLGDHLVGNVYVKFRREEDAE  |
| P62955 | TATPFPVMSLFLVFTA FVISNIGHIRPQRTILAFVSGIFFI |
| A5PJA8 | VVNTSDPDMRREMEQSMNMLNSNHELDPVSEFMTRLFSSKS  |
| Q9WTL7 | KAAENIKALIEHEMKNGIPANRIVLGGFSQGGALS LYTALT |
| P59539 | GHFSNWPATLSIFYLLKIANFSNLI FLRLKRRVKS VILVV |
| Q8BHC1 | QIWDTAGQERFRSITRAYRNSVGGLLLFDTNRRSFQNVH    |
| P49891 | EMMNQKVSFFMRKGIIGDWKNHFPEALRERFDEHYKQQMKD  |
| A6NJV1 | KSHTPFSQGGHFPTIFSTNPNLLMERASTRDRWLHKPSYT   |
| Q0VCT9 | GPGTVNGGHPPSALAPAARFNNSQFMGPPVASQGGSLPASM  |

|        |                                              |
|--------|----------------------------------------------|
| Q99766 | EIISCGNITDKGI IALRHRLNLYLLSDDLPGVREKENLVQ    |
| Q96LJ8 | AIPYELPSSQKPGACAPKSPNQGASDEIPELQQQVPTGASS    |
| Q61039 | VKEEKRRKELNEILKSTVSSNDKKTGRTGWPQHVVWALELK    |
| Q9D0V8 | KKELLLKHTIGAELAHTADRNLSTYLSMWWLHQPYIESNSK    |
| E9Q0B3 | DSANATAVRCCKLPLHAFLDNVGWFVRKLSGLLILLVLF AI   |
| Q28035 | AGVEFEEKFIEKPEDLDKLNKDGSLMFQQVPMVEIDGMKLV    |
| Q2YDG2 | RLAERTQKKTLSAGKDLHDNFKALAVREEDNRSRGKSVIF     |
| Q6ZN79 | LQLEQGKELWREGREFLQDQNPDRSALKKKHMSMHPITR      |
| P59025 | YTFSRAPSPTKSQDQTGSGWNFC SIPWCLFWATVLLLI IYL  |
| P39039 | PFSKVKSLCTELQGTVAI PRNAEENKAIQEVATGIAFLGIT   |
| Q9UMX2 | CKRCRPSVYLSYIKRGKTRNYLYPIWSPYAYLYCYKYRI      |
| Q0X0E2 | RRLSQAEEMRRLRQLRGCTNWRPCYQVEELAAEVERLRTE     |
| Q8IY45 | EASLKRCCNLTDGCVVALALNCQLLKIIDLGGCLSIDVSL     |
| Q8N7C4 | GNGSCTEITPKYRGASNI INNFIIICWSFKIVLFLSFITILI  |
| A6NI73 | LQVWSEPSDLLEIPVSGAADNLSPSQNKSDSGTASHLQDYA    |
| Q9NNZ3 | SQFHSVRPQGPQLRQQQHKQNKQVLGYCLLMLAGMGLHYI     |
| Q148F6 | LNKLCLTVYQLHTLQPNSTKNFRPAGGAVLHSPGAMFEWGT    |
| Q28145 | FVKQSPVPKPGHLAYADSMENFWDWLANITEVQEP LARTKR   |
| P30115 | QQVPMVEIDGMKLVQTKAILNYIASKYNLYGKDMKERAIID    |
| Q61199 | PPDPKPSYADNTKNFWDWLANITEIQEQLARTKRRPIVKTG    |
| Q2T9X7 | DYFPKPKVTRFRTRIHNCINSQGVICLDILKDNWSPALTI     |
| Q80ZM3 | AFSLCWKAPRSPWFLQAVNNGSPLFWRVTGSCLDPKMKA      |
| Q6DIA9 | ARHDSGCKYRLFVTLDDAHQNVIDKFSAVPDPFIEQWNNDIY   |
| P07738 | EDIINITLPTGVPIILLELDENLRAVGPHQFLGDQEA IQAAI  |
| Q3ZCK9 | RRNIHKLLDEVFFSEKIYKLNEDMACSVAGITSDANVLTNE    |
| Q9D8T0 | LLGGPGVGLPRIQQFFTSPENSVTAEPRARKYKCGLPQPCP    |
| Q99627 | NDMNNARYLWKRI PPAIKSANSELGGIISVSGQRIWQRDFPG  |
| P52823 | VSPRKS RVAQAQNSAEVVRCLNSALQVGC GAFACLENSTCDT |
| B1AXV0 | GFSSDKKMGDDVMACVHDDNGRVRIQH FYNVGQWAKEVQR    |
| P10767 | TVERGVVSLFGVRSALFVAMNSKGRLYATPSFQE ECKFRET   |
| Q9QZB0 | DEVLSWSQNFDKMMKT PAGRNLFREFLRTEYSEENLLFWLA   |
| Q9QZM8 | LIHNSCGEQGFRGWEVEHGGNGWAVEKNLTLVPGAPSQTCF    |
| Q05B60 | AVGRCAASPYLVPLTLHYRQNGAQKSWDFMKT HDSVTILMF   |
| Q0VD35 | LYYMLHPRDGGCPAKRLRSENGNDADMVDKNKCC TLCNMSF   |
| P45379 | KEAEDGPMEEKPKPRSFMPNLVPPKI PDGERVDFDDIHRK    |
| P55083 | GKWTVFQKRFNGSVSFFRGNWYKLGFGGRADGEYWLGLQNM    |
| P33681 | HSMCLIKYGLHRVNQTFNWNNTKQEHFPDNL LPSWAITLI    |
| P29965 | QQSIHLGGVFELQPGASVFVNVTDPSQVSHGTGFTSFGLLK    |
| O35566 | VPDSCCKTMVAGCGKRDHASNIYKVEGGCITKLETFIQEHL    |
| P70447 | GAALGASGDSPPSSWSCTNSPASSNSTSPYSCTLSPAS       |
| Q96E11 | GKGQSQTRVNINAALVEDI INLEEVNEEMKSVIEALKDNFN   |

|        |                                             |
|--------|---------------------------------------------|
| P01904 | AKFASFEAQGALANIAVDKANLDVMKERSNNTPDANVAPEV   |
| Q9QYI7 | KKRSVYDRAGCDWRWRAGGGANVPHSSPFGAGYPFRNPEDIF  |
| Q8IZ81 | DTYVGAQRTHRIENSLTYSKNKVLQKATHVVQSEVDKYVDD   |
| Q9EP72 | PMVMMVLPLLI FVLLPKVVNTSDPDMRREMEQSMNMLNSN   |
| O55125 | LYVVHHLWAYKDLQSREETRNAAWRKRGDENVVYTVPLVR    |
| Q32KU2 | FLKVFSRIFGELAVATVICKNKLQGIEVGHFMGGDVGIYTN   |
| Q8QZR4 | LHMDIAVNFSQGGLS PHLHNVC AEATDAIYTRQEDVQFWT  |
| O75391 | KYSHLIGKGAAKDAAHMLQANKTYGCVPVANKRDTRSIEEA   |
| Q99N84 | YRRNHKGGVPPQRTRKTCIRNNKVAGNPCICRDHKLHVDF    |
| Q8R527 | PASFQNVKEEWVPELKEYAPNVFLLIGTQIDLRRDPKTLA    |
| Q46669 | ASATTESKWNINVRQLISGENAVDILAVQEAGSPSTAVDT    |
| Q810M6 | RAEPRDKEENRQTLPSYSINHPCEAIEDTLSSQINESLR     |
| Q9CQM0 | VVDVTFPNIAPFELQEIFKNNYTAFLSIRVVRQSSMHTAA    |
| Q6PER3 | VPQRTSPTGPKNMQTSGRLSNVAPPCILRKNPPSARNGGHE   |
| O00287 | SETTSQVAKQRKPPWCKKHRNKMYKDKYKKKSDQALNCGG    |
| Q9D7G4 | VCKLGTDKDTLSFCHICFELNLEGVPKSNLLHTKSVRGHKD   |
| Q9CQA5 | RKGAISSSEI IKYAHRISASNAVCAPLTWVPGDPRRYPYPTD |
| O94903 | LEFVGLMTIGSFGHDLSQGNPDFQLLLSLREELCKKLNIP    |
| Q8N8F6 | QSNFTIDNQEQQSGNDSNAYGNLYGSRKQAGEQPQPASFVP   |
| Q9BVM2 | VGDPAPLGAGNLGPELIKESNANPIFMRKDTKMSFQWRIRN   |
| Q3ZCD0 | TLTTSVLKNSLCPSSGNVITNLFKEDCHGKIDELFSGKLYL   |
| Q8IUA0 | FDFKNYRCTPFKYRGCEGNANFLNEDACRTACMLIVKDGQ    |
| A0JNC3 | VLFVGVVLA LVLNLLQVQRNVTLPDEVIATIFSSAWWVP    |
| Q8N699 | APISQWSSRRSRSSYTHGLNRTGFYRHSGCERRSNLSLAS    |
| Q7Z7J5 | PQKARCKIPALPLPTILPPINKVCRDTRLRDWCQQLGLSTNG  |
| Q3SZR5 | LGRSSTAFSRGGHFPTIFSLNPTQVLRNRLTRDRWLHTPS    |
| O08989 | DLMHLRKVTRDQ GKEMATKYNIPYIETS AKDPPLNVDKTFH |
| Q0III0 | SDARTIALKQRTWQALAH EYNSQPSVSLRDFKQLKKCWENI  |
| Q9D8S4 | YEFLSFVRQQTPPGLCPLAGNSVHADKKFLDKHMPQFMKHL   |
| O75391 | AKDAAHMLQANKTYGCVPVANKRDTRSIEEAMNEIRAKKRL   |
| A4FV84 | KRDKKVSLTKTAKKGLELQNLIEELRKCVDTYKYLFIFSV    |
| Q9CRB5 | GMEENTDYPLWTDLASLQATNKERQFFALYKLFYCLRVDTF   |
| A6NDL7 | HLCKETTIILWAMKFRLEKENKFVDRFKELFDLEEISSFPS   |
| Q9JIZ9 | NMYELRSGTGQQLGQAAEESNCCARLCCGARRPFRIRLADP   |
| Q8TBF4 | VIKASIAIDNGRAAEFIRRRNYFDKSKCYECGESGHSYAC    |
| D3Z4I3 | AAERACKDPNPIIDGRKANVNLA YLGAKPRIMQPGFAFGVQ  |
| Q1JPA6 | LYWALTMIGFETTILGGYVYNTFNDKYSSAMIHLLKVTID    |
| P04393 | LLFETLSSLNATFITSTWHHNDYRENKYVRDLWSSFRILTK   |
| Q96LD1 | EIHSRKDSFLVLSQDRNVTVNARNHMGQLTGQLTIGADAVE   |
| P83714 | GAFALALTQHLQLVGGDQSYLNP GSPILLAQLGAARLRAQGL |
| Q7L0Q8 | LCAEEIKAASYIECSALTQKNLKEVFDAAVAGIQYSDTQQ    |

|        |                                             |
|--------|---------------------------------------------|
| Q5E9V3 | RFNTTAVPKYYQSPWEQAIISNDPELLEALYKFFKPEGKAE   |
| Q9QXT1 | EPCIYESVRVHTAMQTGRTEIDLVPAPTASLGTKEGYLTKQG  |
| Q9DCG2 | VRKQCTDHGADMVSIHNEEENAFILDTLQKRWKGPDLLLG    |
| Q3T127 | HNKPTFSQTI VLLNLYRNPQNTAQTAGSHCHVSDVEVQEH   |
| Q9Z0H7 | REKTQSFLIQKITDEVLKLNRNIKLEHLKGLKCSSCEPFAAG  |
| Q32L00 | AQPAPTAENNLQQRPGKAWMNKEQHLSDRQFVFKEPQEGVR   |
| Q2KIX7 | YHFGFDIELFQSAVKVGLMRNGIQIRDKRAEAGDSHEQASG   |
| Q9NYW5 | FFVLCFMFLDSSSVWFVTLNLYCVKITNFQHSVFLLLKR     |
| P16114 | MLRHLKDALMI IYGMSKIDTNACRSMSRKIMTTEVNKTLDD  |
| P35428 | AHSGPVI PVYTSNSGTSVGPNAVSPSSGSLTSDSMWRPWR   |
| Q7SIB3 | SLVSPGSCLEDFRATPFIECNGARGTCHYYANKYSFWLTTI   |
| P01903 | EPLLKHWEFDAPSPLPETTENVVICALGLTVGLVGI IIGTIF |
| Q0VBU9 | EIKEAFLAVSLALALNGVCTNTIKLIVGRPRPDFFYRCFPD   |
| P05208 | NCGGSLVANNWVLTAAHCLSNYQTYRVLLGAHSLSNPGAGS   |
| A8MVS1 | LQLEQGKELWREGRVFLQDQNPRESALKKKHMISMHP IIR   |
| Q3UJP5 | SQRACDRLRVACDFRIVSYNDYMWKSCDYLFRRNMPEF      |
| Q08DE6 | FLGAGIIFGLYYDAIWAFANNQLIVSGPNGTAGIFATYPSG   |
| Q2KHU0 | RSIVEHVASKLNI PSTNVFANRLKFYFNGEYAGFDEQPTA   |
| P63075 | QNQREAHFIKRLYQGQLPFPNHAERQKQFEFVGSAPTRRTK   |
| Q9JMF7 | FKRELHTISFLGGLALNQGVNWLKHKVIEPRPCGGPHTAV    |
| P43430 | SKDWVKPGQVCTVAGWGKLANCTLSDTLQEVNLEVQKGKQC   |
| O15492 | CDTGSTGKFEWGSKHSKENRNFSEDLGWRESFDLLSSKN     |
| Q96FW1 | AYDEAIMAQDRIQQEIAVQNPLVSERLELSVLYKEYAEDD    |
| P70660 | LRRSRVKANDRERNMHNLNAALDALRSVLPSPDDTKLT      |
| Q9BUN5 | GLPEEQKKTADRNLQDLSNLEDLSNSIQKHLAENAEPE      |
| Q9X2V8 | YSWNIKKGMAWIFISNKKENRLYSLNEEHLIRKEISNLSI    |
| Q9D7U6 | LLSLLGWVLSCLTNYLPHWKNLNLELNEMENWTMGLWKSCV   |
| O02659 | KFVDLTGKGVTYQNWNDGEPNNASPGHCVTLLSDGTWNDI    |
| Q922M7 | PLIVFDGSSTSTSIKVKRTENGADDRKPLAQIGSTSDAFW    |
| Q96A61 | PGQFTCPQCRKSFTRRSFRPNLQLANMVQIIRQMCPTPYRG   |
| P09012 | GFKEVRLVPGRHDIAFVEFDNEVQAGAARDALQGFKITQNN   |
| Q5E9B7 | ESNTAGLDIFAKFSAYIKNSNPALNDNLEKGLLKALKVLDN   |
| P38447 | TFYLSNVAPQVPHLNQNAWNNLEKYSRSLTRTYQNVYVCTG   |
| Q8K2U2 | YYVPDFISKEEEYLLRQVFNAPKPKWTQLSGRKLQNWGGL    |
| P52907 | DEEKVRIAAKFITHAPPGEFNEVFNDVRLNNDNLLREGA     |
| O35326 | AHRPKLNEGVEFASYGDLKNAIEKLSGKEINGRKIKLIEG    |
| P30048 | WGISATAALRPAACGRTSLTNLLCSGSSQAKLFSTSSSCHA   |
| Q9ER00 | FKDLAMMIHQGDLDISIEANVESSEVHERATDQLQRAAY     |
| O02691 | FGRVDVAVNCAGIAVASKTYNLKKSQAHTLEDFQRVINVNL   |
| O95999 | EHLKGLKCSSCEPFDGATNLSRSNSDESINFSEKLRASV     |
| Q9P299 | LMLMSVLTCLFESLNHMLRKNVEKRWLLENMDGAFVLDEI    |

|        |                                             |
|--------|---------------------------------------------|
| Q6XJV6 | SAVALQHEGNYLCEITTPPEGNFHKVYDLQVLVPPEVYFLG   |
| Q68CL5 | TIIEKPPAERHMISWEQKNNCVMPEDEVKNFYLMTNGFHMT   |
| P45379 | REKKKKILAERRKVLAIIDLHNEQLREKAKELWQSIYNLEA   |
| A6NLU0 | RALVSIKELEPKLKSVLTMNPRMRKFQVDMTFDVTANNY     |
| O95237 | GDVLEVPRTHLTHYGIYLGDNRVAHMMPDILLALTDMMGRT   |
| Q9CPZ1 | TPLQSQETETPSTGPFVFFALNRNLEEESSFTRLQDQNRRE   |
| Q99JZ0 | KTGLRLQAVDKGLFVQLVQANTPASLVGLRFGDQILQIDGC   |
| A3KMZ6 | ASDQIENMVPVKDRIKIKITFNADVHASLQWVFRPQQTEIYV  |
| P11226 | VKFQASVATPRNAENGAIQNLIKEEAFLGITDEKTEGQFV    |
| Q9H7V2 | TVPASLDSSRSEPMQQLDPNTLQQSVESRYRPNIILYSEG    |
| P97469 | RSNLRAHLQTHSDVKKYQCKNCSKTFSRMSLLHKHEESGCC   |
| Q5T0J7 | GKTHREPQLRPPKMDGASGVNGAPCALHKKTMAPQKTKQGS   |
| Q91WG1 | HKFKREWSSVMRCVAVFVGINHASAKVDFDNNFQFSLTLAA   |
| Q59I47 | FRHCFVHNLCPLLLAPSGRNITPAELPAKQREQLLGVCD     |
| A6H759 | DATVKELKMLNLKTLTLYQNPLCQYNYRLYIYHHPGVE      |
| P08034 | NPPSRKGSFGHRLSPEYKQNEINKLLSEQDGLKIDILRRS    |
| P56177 | SPPVPPGWNPNSSSGKSGGNAGSYIPSYSWYPSAHQEQAM    |
| Q5E9D3 | SENQRLKQSKELDAEKAFANEQLTRAILRERISNEEERAK    |
| P97822 | LELSDNIISSGLEVLAEKCPNLTYNLNSGNKIKDLSTVEAL   |
| Q9JKT3 | DGILTLVASLVNLSLLQFMLNVTFASLLIHSRRHIQKMQR    |
| Q9H6K1 | PDTWAPAPDQTEQDQNRLSQNSVNLSPSSHANNLSVVTYSK   |
| P15018 | GSPLPITPVNATCAIRHPCNNLMNQIRSQLAQLNGSANAL    |
| P19397 | KLNEYVAKGLTDSIHRYHSDNSTKAAWDSIQSFLQCCGING   |
| P26842 | FLVFTLAGALFLHQRRKYRSNKGESPVPEAEPCHYSCPRE    |
| Q9UIY3 | ICVEGFKEHCEEFWHTIRYPNWKHISCKHAESVETEGNGED   |
| P06624 | EIFLTLQFVLCIFATYDERRNGRLGSVALAVGFSLTLGLHF   |
| P01138 | TTATDIKGKEVMVLGEVNINNSVFKQYFETKCRDPNPVDS    |
| P14190 | GSITADDYRQKWEWKVGTGLNGFGVNLNDLTNGGTKLITV    |
| Q8R0F8 | STKPLSRFEWEGKNIVCVGRNYADHVKEMRSTVLSEPVFLF   |
| Q9BS92 | VVGVFHTEYGEELNRVHVLWVWNESADSRAAGRHKSHEDPRVV |
| A6H789 | RIQSVHKNAFNLLKARARIANNPWHCDCCTLQQVLRSMVSNH  |
| P16368 | PVHPQQAFCNADIVIRAKAVNKKEVDSGNDIYGNPICKRIQY  |
| Q6EIG7 | QWIDKTPYEKNVRFWHLGEPNHSAEQCASIVFWKPTGWGWN   |
| Q96L15 | FLVTRFSQDGAQSLVTLWSYNQTCSHFNCAYLGGEKRRGCV   |
| Q9CY52 | DIVIAYGQSDEYSFVFRKKSNNFKRRASKFMTLVASQFASS   |
| Q9NSI2 | PEATPPPASAAGKDWAFINTNIFARTKIDPSALVQKLELDV   |
| Q8N8I6 | GRAEGRQARKSACKCPRKGNPGPWTRAAAWWRLEGAKAS     |
| Q9BX74 | FPAPNITCKDSSGNETHFTGNEVGFFKPISCRNVNGYSYKV   |
| Q8VE04 | VHVYIHHFDRVIVMGAEAHVNTCYKHFFYFVTEMNLIDRKE   |
| A6NLU0 | WEVDVGTQVVDVGVCKESVNRQGGKIVLSSEHGFLTGVCRE   |
| Q3MHQ4 | HTGEKPFSCSHCSRAFADRSNLAHLQTHSDVKKYQCKSCS    |

|        |                                              |
|--------|----------------------------------------------|
| P19387 | NQPTVRITELTDENVKFIIENTDLAVANSIRRVFIAEVPPII   |
| Q6IE21 | YYMRKHIDDFLPFFTEPEAGNFYTRDFLRYCDDIVHNASW     |
| P31946 | MAAAMKAVTEQGHELSNEERNLLSVAYKNVVGARRSSWRVI    |
| Q8TAV4 | AEAEATREARAKVLAEEGEMNASKSLKSASMVLAESPIALQ    |
| Q9NVP2 | LQRNILASNPRVTRFHINWDNNMDRLEAIETQDPSLGCGLP    |
| P23774 | LTSLRRVIEPSVKFAAESYTNKRSFKERIFKVKSCSIVIDL    |
| Q32KN7 | GRRFAADVLERHGPICRKLFNKRRKPFNSLKRQLRGTDIPT    |
| Q9D902 | VEHGGSSGSKQNSDHNNGSFNLKALSGSSGYKFGVLAKIVN    |
| Q58DP0 | LITQTATRAGFTGGVVVDYPSAKAKFYLCFSGPSTSLP       |
| A2A5I3 | VWGNWQQAVYLVLCNYAIKGNWIGEAPYKAGKPCSACPPSY    |
| Q91WN1 | IESKEIPAYSASFVKESKQKMNARKRRAQEEAKEAELSRKEL   |
| P53808 | SRVFMYYFDNPGGQIPSWLINWAAKNGVPNFKDMVKACQN     |
| Q9EP73 | VNATANDVYCTFWRSQPGQNHTAELIIPELPATHPPQNRT     |
| Q91ZM8 | ELKRLLYDTFCEHLSMKDIENIIMTEEESHLGTAEECPVDV    |
| Q9TR36 | PAFVRMIAPEGSLVFHEKAWNAYPYCRTIVTNEYMKDDFFI    |
| O60939 | ARLPCTFNSCYTVNHKQFSLNWTYQECNCCSEEMFLQFRMK    |
| Q8BGS0 | LWERVRLSKNYEKALEQIDENLIYWPRFIRHKCKQRFTKIT    |
| Q86VG3 | HLSQEDHVS KRGVFGTDSSENI FTSAKVTHKNEADYHLRN   |
| Q92813 | VCIVQRQKIAYLGGKGFPSYNLQEVHRHWLEKNFSKRUKTR    |
| Q32LB5 | HNSCSSKSFKCHPTFYAGENLWLGPLTISA AKFAINMWYD    |
| Q9QUN5 | LTHLSDDDGMMTRAVELNYGNKVLEGA KALLSRIQPGIEE    |
| Q6UJB9 | LTWKL MQAHFSLGWLPSQNSVLEAPALLRRLYLWVEHR      |
| Q9BPW8 | RNQLLEFSFWNEPQPRMGPNIYELRTYK LKPGTMIEWGNN    |
| O75934 | AQKELQKLRKHIQDLNWQRKNMQLTAGSKLREMESNWWSLV    |
| O08542 | YWNSSNPRLLRGDAVVELGFNDYLDIFCPHYESPGPPEGPE    |
| Q8CC84 | LLPTTQKPVADGADCGIQWNNAVFLMLLIGIVLPVLYVYF     |
| Q2TBG9 | QPKEEGDDFIDYPMDDGVWNVVDSRYVTLTGTITRGKKK      |
| Q17QJ3 | SPVRVRGALEEPPAVQHFFLNVFELERLLYTGKTACNHADE    |
| Q9JIN6 | FIFGFCWLSPALQDLQATAANCTVLSVQQIGEVFECTFTCG    |
| P19879 | IKPAPPSQQDSRIIYDYGTDNLEETFFSQDYEDKYLDGKST    |
| Q9D8U3 | NAEDIENLDAAKLSRFIHVNNLHWVTEYSPMIAAGLFNTMV    |
| A2A7V7 | NGRVSIRDHPDNLFTVTLENLTLEDAGTYMCMVDIGFFYD     |
| P35705 | LALRGLFIIDPNGVIKHLVNDLPVGRSVEETLRVKAQFQF     |
| P21926 | GYSHKDEVIKEVQEFYKDTYNK LKTKDEPQRET LKA IHYAL |
| Q8NGA4 | FRTTRKWNCGMCQYLQFNLENETAQMWTQEVFGRQMAVIMA    |
| Q6PI78 | IEMSIGIILGISTMAAAAALGNLVSDLAGLGLAGYVEALASR   |
| P31955 | RSVLLLLVLGSGHYAAAELNDPSSGKGESLSDHSAGGLE      |
| Q9JJZ6 | ICEKRFMRSDHLTKHARRHANFHPGMLQRRGGGSR TGSLS D  |
| Q8BJ83 | QAIKDPGPTRTFSVVPRAAENQLFSHLTESTEIPPYMTKCP    |
| Q8R035 | YIPLDRLSISYCRSSGPGGQNVNKNVNSAEVRFHLASADWI    |
| Q99935 | AASTENTTQILANRPHTVLLNATVQVTTSNQITILSSPAFKS   |



|        |                                              |
|--------|----------------------------------------------|
| Q5SSH8 | NGLSSSEILTLHNWLSFYEKNYVVFVGRVLVGRFYRKDGLPTS  |
| O94907 | VAMVAAALGGHPLLGVSATLNSVLNSNAIKNLPPPLGGAAG    |
| Q2KIP8 | SSRRKKGFGPLTTAYLVIYNVMTAGWLVIAGLVRAYLA       |
| Q9H446 | EEEQAGKNKLSGKQLFETDHNLDTSIQFLEDAGNNVEVDE     |
| Q17QU3 | IRPSRIHRRKFDPKGNEIEPNFSATRKVNTGFLMSSYKVEA    |
| Q8BL97 | RFERGFWLWGGDSETKVYVGNLGTGAGKGELEAFSYYGPL     |
| P41976 | RQKHSPLDLPYDYGALPHINAQIMQLHHSKHAAAYVNNLN     |
| A0PG75 | VGPCVTCGCFGDVDFEVKTINEKLTIGKISKYWSGFVNDVF    |
| P30408 | CIAANILLYFPNGETKYASENHLRSFVWFSGIVGGGLML      |
| Q6UX53 | TWKHIGDGCCLTRETWKDLENAQFSEIQMERQPPPLKWLVP    |
| P17918 | RNLAMGVNLTSMKILKCAGNEDIITLRAEDNADTLALVFE     |
| P97348 | GVPIIVVGCKIDLKDKVLVNNLRKKRLEPVYHRGHDMAR      |
| P32972 | KKQTLVTVCESGVQSKNIYQNLSQLFLHYLQVNSTISVRVD    |
| Q91XE0 | LPESLKVYGTVYHMIHGPNFNKALVDKWPDFNTVVVRPQE     |
| P56749 | LLFFLAGTVSLSPSIWVIFYNIHNLKKEPVPVFSFDYAVYVT   |
| Q92623 | PGRLSEEQSKTVEAIEIDCYNSLAACLLQAELVNYERVKEY    |
| Q8BGP5 | RHYPTEEEEQALELLESEMEENDPYPAEYEVINQFQPPPAYT   |
| Q8MJ50 | LYWACHGGHRDIVEMLFTQPNIELNQKQKLGDTALHAAAWK    |
| Q3KNV8 | VPGDIKGETCSAKQHLDShRNGETKADSSNKEAAEEKPEE     |
| P61328 | PVGLRVVAIQGVKASLYVAMNGEGYLYSSDVFTPECKFKES    |
| P61026 | KGEQIAREHGIRFFETSAKANINIEKAFLLAEDILRKTPV     |
| Q2WG77 | QEGARNERAAYLWRPWLSSINDQPRQARSLVDWADNRATAA    |
| P33681 | EKKMVLTMMSGDMNIWPEYKNRTIFDITNNLSIVILALRPS    |
| Q5VVH5 | VCRRLDYITQSLQQQGVQAENITVTKDFRRVENAYHMEAEV    |
| P51908 | GGRHSVWRHTSQNTSNHVEVNFLEKFTTERTERYFRPNTRCSIT |
| P04227 | TNEAPQATVFPKSPVLLGQPNTLICFVDNIFPPVINITWLR    |
| Q9Y478 | VYLSGSFNNWSKLPILTRSHNNFVAILDLPAGEHQYKFFVDG   |
| Q9DCU6 | LDIVHQVAIWQRNFRRIISYANTKTRAEVSGGGRKPWQQKGS   |
| Q92564 | TTEKLRNTLDYLRSLNDSTNFKLIYRYAFDFAREKQDRSL     |
| B3SHH9 | WRTCRVQSFCPLMNPFRLENVTVSESSRQLLTMHGTFVIL     |
| P61087 | PETYPFNPPKVRFITKIWHPNISSVTGAIICLDILKDQWAAA   |
| Q14B98 | RAVASCSSQAPDHRAPDFENGHFLPRDRSSIGTVEERGIR     |
| Q9BRU9 | LLSMVEEGNPHHYFVATQDQNLVSVKVKKPGVPLMFIIQNT    |
| Q8SPU5 | SLTGALSNGLLSEGLLGIENLPLLDILKTRGNAPSGLLGS     |
| P09417 | LVIYGGRGALGSRVQAFRARNWVASVDVVENEEASASIIIV    |
| Q7L8S5 | ILRRHQREQEQLQAQIRSLKNSVPKTDKTKRKQLLQDVARM    |
| Q7YRQ8 | CSANVTRYFNPFRHKACEAFNYTGCGGNDNNFVNLKDCKRT    |
| P16114 | ADAFNASEITIRKRLESENTNFNQILMQLRMSKAALLLEN     |
| Q6UWM5 | CPNLGGASTAIFVCNYGPAGNFANMPYPVVRGESCSSLCSKEE  |
| Q8K3W2 | FKALPRVVCTLKQLCILIYLGNNKCLDLPDELSLQNLRTLW    |
| Q5E9M6 | KDSKSFNCRIEYKVDKATKNTLCNYDPSKTCYQEQTQSHV     |

|        |                                             |
|--------|---------------------------------------------|
| P82923 | TARSCGEYAHTRYFKGGLLTNAPLLLGARVRLPDLII FLHT  |
| Q9TQE0 | LLVCSVSGFYPGSIEVRWFRNGQEEKAGVVSTGLIQNGDWT   |
| Q9UJ68 | CQLLLHSLFPVPRMGNSASNIVSPQEALPGRKEQTPVAAK    |
| Q9NW97 | KPLKVRRIKSEKHLKDFRINLPDKNVPPSIEPLTPPPQY     |
| Q32KU6 | FRHEIKNSLKNNYEKALKQYNATGDYRSDAVDKIQSMLHCC   |
| Q3T197 | MRPRDRSRVIDGAKHAHKFCNTEDEETIYLRRPEGIERQYR   |
| Q80XC2 | ALAAHGFTLSTLEVLQPQVYNVRTVSLPLDLGANNLETNM    |
| P46638 | NLSFIETSALDSTNVEEAFKNILTEIYRIVSQKQIADRAAH   |
| Q32LD7 | CKSSGKVISSVYSRESQHSRNPRTIVLQTNPNPVYESPNLA   |
| Q92623 | LVNYERVKEYCLKVLKKEGENFKALYRSGVAFYHLGDYDKA   |
| A6XGL0 | QCEKMDIPFLSYLPTEVQLINEAYGLVVDAVLGPGVEPGEV   |
| Q9UBW8 | ANQHKEQQGLKQQIESEVANLKKTIKVTTAAAAAATSQDP    |
| Q6PF18 | WKGWDRKAQRNGLRSQVYAVNGDYVVGWKNVKGKGTQV      |
| Q9UKW6 | LQFCCDQYKLDTNCSIFCNFNISGLQLCSMTQEEFVEAAGL   |
| P62261 | DYHRYLAEFATGDRKEAAENSLVAYKAASDIAMTELPPTH    |
| P16563 | AQKWANKCILEHSSKDDRKINIRCGENLYMSTDP TLWSTVI  |
| Q6IR37 | VCILRRDHHCRLLGCCVGFHNYPFLC LLLHSAGVLLHISV   |
| Q96FW1 | PLVSRLELSVLYKEYAEDDNIYQQKIKDLHKKYSYIRKTR    |
| P21912 | YEVDLNKC GPMVLDALIKIKNEVDSTLTFRRSCREGICGSC  |
| Q15006 | EHDYAKAAFCLEELMMTNPHNHLYCQQYAEVKYTQGGLENL   |
| P13765 | ADCYFTNGTEKVFVVRFI FNLEEYVRFSDVGMFVALTKL    |
| Q96CS7 | YGYGPPYGGAYPPGTQVVYAANGQAYAVPYQYFAGLYGQQP   |
| Q9WVF9 | IGLHRESSEHPKWKTNNTEYNNMNPILGVGRYAYLSSDRIS   |
| P08861 | AQLGDAVQLASLPPAGDILPNETPCYITGWGRLYTNGPLPD   |
| P70122 | PYTVILIERAMKDIHYSVKPNKSTKQQALEVIKQLKEKMKI   |
| Q9CR11 | ITETGWGEFETIIKIFFIDPNERPVTLYHLLKLFQSDTNAM   |
| P35330 | KINCSTNCAAPDMGGLETFTNKIMLEEHPQ GKWKQFLVSNV  |
| Q5E9V3 | NTMVKQRKQQA SAIMKEIHGNDVDVMHLGKKS IPRDIMLE  |
| P04071 | DECEVWLGNQLFQEEPSAQNRLVSKSFPHPGFNMTLLTFE    |
| Q9NP99 | VGRIILEDYHDHGLLRVRMVNLQVEDSGLYQCVIYQPPKEP   |
| P59024 | KGKIPPESTLIFNIDLEIRNGPRSHESFQEMDLNDDWRLS    |
| Q8NAU1 | LVQADSPSAPVNVTVRHLKANSAVVSWDVLEDEVVIGFAIS   |
| Q92535 | IYAMSVFMLLGHLIFFDYGANAAIVSSTLSLNMAIFASVCL   |
| Q9JHH9 | LMLMSVLA CLFDSLSHILRKNVEKRWLENMDGAFLVLD ET  |
| P61213 | RISENGQVPVLIVANKQDLRNSLSLSEIEKLLAMGELSSST   |
| Q9D7Z3 | AAKHFIHSCLYGSDSKRTTVNKFLSLNNKRS PVKAAAQFL   |
| Q9CYH2 | YGPERRKMMFMGLIRLGWVYNSFRAWNGGFSGNLEGE GFIL  |
| P61328 | IYSS TLYRQQESGRAWFLGLNKEGQIMKGNRVKKT KPSSHF |
| Q2NL00 | ELYLDLLSQPCRAIYIFAKKNRIPPELRTVDLRKGQHLSDA   |
| Q32LN3 | LEELEWKLAEVGAIQT DLEENPKKAI VDMVSSIRNTSIYG  |
| Q9BQY4 | QYSRPQGA VGGLEPGNAQQPNVHAFTPLQLQELERIFQREQ  |

|        |                                             |
|--------|---------------------------------------------|
| Q0VC21 | YLIDLGRVDPTQPIDLTQLVNGRGTI QPSKR DYGVQLVEE  |
| A0PK11 | CGLGGRQSQFTIFPHLVKELNAGLHVMI LLLLFLALALALV  |
| P50194 | WIWCSGTSVKAVDFIHYDEKNNENLLQVKNRDNTESSSS     |
| Q9BGL2 | EVAQRAEKLLGITPYSLWNCEHFVTYCRYGTPIS PQADK    |
| 043247 | LGAQDQRSTPTNQKGSII PNNIRHKFGSNVVDQLVSEEQAQ  |
| Q9NPL8 | RWGWRTAVFVTIFNTVNTSLNVYRNKDALSHEFVIAGAVTGS  |
| B2RVY9 | CWFSGVVEENNSNIWKFWYTNQPPSKNCTHAYLSPYPFMRG   |
| Q5E9E3 | IKDQPRPAFSAVGPNSVSRDNVVVFGKVI TNQENVYQNN TG |
| Q03287 | GEKI PRKGGPGITHSDLLVINKIDLAPYVGASLEVMEADTA  |
| P58465 | NYVKDLSRLGRELSKVIIVDN SPASYIFHPENAVPVQSWFD  |
| Q8WVD3 | QENTSSSGHPTFKCPLCQESNFTRQLLDHCNSNHLFQIVP    |
| Q6NVE3 | KEGDEPITQWKGTVLDQVPINPSLYLVKYDGDICVYGLELH   |
| Q08E08 | FWWSYNSSDTYKILIDGTVKNEKSDPKVKLDDDRITLEGS    |
| P27812 | ECPQDWLSHRDKCFRVFQVSN TWEEGQADCGRKGATLLLIQ  |
| Q6UW01 | GRVAFAAVRSHHHEPAGETGNGTSGAIYFDQVLVNEGGGFD   |
| Q9HDB8 | NTEVLVWEECVANSAVILQNNEFGTI IDWAPRGQFYHNCSG  |
| Q9Y5X0 | LQSNALLVQLPELPSKNLFFNMNNRQHVDQRRQGLEDFLRK   |
| Q5TA31 | RKALRGKENKGSVEIMRKDLNDARDLHGQAESAAAVWKGHV   |
| 008602 | PSATWEFNI SDSYFFTFY TENMSWRSANDESGVIMNKWKDD |
| 075608 | IIGLSPDSQEDESIGIKQAAENIKALIDQEVKNGIPSNRIIL  |
| Q9NZC4 | LFQSTHNVIKTEQTEPSIMNTWKDENLYDTNYGSTVDLL     |
| 097563 | QILSDGKVFVHLCNYIEPWENLSFLQRESLNHHYHLNCGCQ   |
| Q9BTT0 | DLSTVEALQNLKNLKS LDFNCEITNLEDYRESIFELLQOI   |
| 000560 | ANPANPAILSEASAPIPHDGNLYPRLYPELSQYMGSLNEE    |
| Q95104 | GLSGRLGEDAESELMGDAQLNDGALEAEARDSNEEPEKQV    |
| Q1RMU1 | MEYIGSQNASRGRQRMMHPNVSQGCQGCATCSDYNGCLS     |
| P09661 | NEIRKLDGFPLLRRLKTL LVNNNRICRIGEGLDQALPCLTE  |
| P18121 | TALPGASESMGKKAADIKGRNLVILEGLQTIYNRSQANIEE   |
| 070578 | KSCHEVTPSGEKNCYSYFRHFNPGESSEIFEF TTQKEYSISA |
| Q920L5 | QEYEFEKQFNENAIQWMQENWKKSFLFSALYAAFIFGGRH    |
| Q9Y524 | DRAEMTVFVRSFDGFSSAQKNQEQLLTLASILREDGKVFDE   |
| Q9H7E9 | PGTPCASRGARLPGPVSSARNPSTVCLCFEQPTCSNADSRA   |
| Q9QYI7 | DIKKAYRKLALRWHDPKNPDNKEEA EKFKQVSEAYEVLSD   |
| P01246 | SLLLIQSWLGPQLFLSRVFTNSLVFGTSDRVYEK LKDL EEG |
| P04441 | VSHIPAVYPGAFRPKCDENGNLPLQCHGSTGYCWCVPNG     |
| Q86WH2 | LPQLQNFLRILDKEEDEQLQNLKRRYTAYRQKLEALREVW    |
| Q9BZX2 | EQKAKALKGQFNFDHPDAFDNELILKTLKEITEGKT VQIPV  |
| Q9CYN2 | KNSLDDS AKKVLLEKYKYVENFGLIDGRLTICTISCFFAIV  |
| Q86XT2 | VRLSRKFQGLQLEREACLASN YALAKENLALRPRLEMGRAA  |
| Q8BGN8 | VAVFAFLYSLAATVVYIFFQNKYRENNRGLIDFIVTVVFS    |
| Q91ZT8 | HVVARMSSELVHLLMDFGANAQAKNADGKRPVDLVPLESP    |

|        |                                             |
|--------|---------------------------------------------|
| P68254 | TEQGAELSNERNLLSVAYKNVVGRRSAWRVISSIEQKTD     |
| Q2KI14 | NARPELMMQHCNLLCLPENYQMKYYFYHGLSWPQLSYIA     |
| Q8CGZ9 | ILSQHINSLAIETRRIFLSNFSSDMFITFTLQFNRHDEFV    |
| Q8R218 | VILFLWAIAGIWIWFAIAVNGSVDLNEGFPFISICGSYAP    |
| Q3SYR2 | FTVGDKPVNNFRMIERHYFRNQLLKSDFHFGFCIPSSKNT    |
| P11245 | EGVYCLVGFILTYRKFNYKDNLDLVEFKTLTEEEVEVLKN    |
| Q9Z2U0 | DLTIKLVIKALLEVVQSGGKNIELAVMRDQPLKILNPEEI    |
| P97370 | FYGFALAALFTFTMWAMLQTLNDEVPKYRQI P SPGLMVFPK |
| P61019 | GLIFMETSAKTASNVEEAFINTAKEIYEKIQEGVFDINNEA   |
| Q96EL1 | DACLEHWQGLEAEDWTAALLNRGRSRQPLVLGDNCFADLVH   |
| Q96KN4 | VPAGTQPPQQYYLKVHLGENKVHTARFHSLEDLIREKRRI    |
| Q60774 | MAFVLYPPCGSATWNLSDIQNKMFSLMFCFWHYASILILIG   |
| Q15072 | QKKYLKHKQNIHTGEKPYECNECGKAFSQRSTLIVHVRHS    |
| Q91XE0 | NTVVVRPQEQEMTDDLDYINTYQVYSKDPQNCQEFLESSE    |
| Q9BUB7 | FSYSTSLIGLTFLPYIFTQNNAISESVP LPIQIIFYGIMGS  |
| Q719H9 | SPASPLNNQGIPTPAQLTKSNAPVHIDVGGHMYTSSLATLT   |
| P13598 | APQEATATFNSTADREDGHRNFSCLAVIDLMSRGGNIFHKH   |
| Q60654 | HELQETLNCHDNCSPTQSDVNLKDELLRNKSIECRPGNDLL   |
| P97760 | QELRLRAYVKKRSGKEHAKWNPTAGVAFEYDPDNGLRHTVY   |
| Q8N3Z3 | VRIDHAPDLPRPEVCFIGRSNVGKSSLIKALFSLAPEVEVR   |
| P01921 | NSQPEILERTRAEVDTACRHNHYEGPETSTSLRRLEQPNVAI  |
| Q9CR59 | RQAREQRIAECMAKMPQMIENWRKQKRERWEKIQADKERRA   |
| P51124 | GRLSRVLRDLQVLDTRMCNNSRFWNGSLSPSMVCLAADS     |
| Q96IY1 | HPVVHPLDLKYDPDPAPHMENLKRGETVAKEISEAMKSLP    |
| Q96GR4 | RCVRRYDHHCPWMENCVGERNHPLFVVYLAQLVLLWGLY     |
| P57784 | IRKLDGFPLLRRLKTLVNNNRICRIGELDQALPCLTELI     |
| P01895 | LPEPLTLRWGKEPPSSTKTNTVIIAVPVVLGAVVILGAVM    |
| O09116 | PGNTVVLEPDYTTMPGPCSTNITEPDYTTIPGPCSTNITEP   |
| Q3URK1 | NKTEDSGVSSQDGERGSAPANETRSNASQKPRGDADVQNS    |
| Q1LZA1 | TAKEIVNVGHSFHVNFEDSDNRSVLKGGPLSESYRLRQFHF   |
| Q9Y3A6 | KSDGVHTVETEVGDYMFCDNTFSTISEKVIFFELILDNMG    |
| B2RVL6 | KKRCFGEYKCPKCRKWMMSGNSWANMGQECIKCHINVYPHK   |
| Q5E9E8 | QIFQPTQTYTPTTPQPFYGNNEFEDEP LLEELGINFDHIWQ  |
| P97466 | RRKLQMWLWSQTFCPVLYAWNLDLSRFWPRYVKVGSFCFSKR  |
| Q9H765 | ANPNALDGNRDTPLHWAAFKNAECVRALLESGASVNALDY    |
| Q96HF1 | DLKKSVLWLKDSLQCTCEEMNDINAPYLVMGKQGGELVIT    |
| Q6PIF2 | AQELIENINKSRQKDHALMTNFRNSLTKVSDLTEKLEERI    |
| P19217 | IICMIYNNGDVEKCKEDVIFNRVPYLECSTEHVMMKGVKQLN  |
| Q60819 | VCNSGFKRKAGTSTLIECVINKNTNVAHWTTPSLKCIRDPS   |
| A6QLZ1 | VTDLKEKTKAELQPPQGEKENLVGAEEASLEAPEVSSTEAS   |
| Q13595 | RRSRSHSPMSNRRRHTGSRANPDNPTCLGVFGLSLYTTTERD  |

|        |                                             |
|--------|---------------------------------------------|
| P25787 | SDPSGAYFAWKATAMGKNYVNGKTFLEKRYNEDELEDAIH    |
| Q13588 | QHFKVLRREASGKYFLWEEKFNLSNELVDFYRTTTTIAKKRQI |
| A6NLC5 | QPPLPPDSFRYCMISDLFIDNYQVKCINGKMCYVQKQPAPH   |
| Q3T0M9 | IVILGLDCAGKTTVLYRLQFNEFVNTVPTKGFNTEKIKVTL   |
| A4FUA8 | THAPPGEFNEVFNDVRLLLNNDNLLREGAAHAFAYQYNDQF   |
| Q8N8F6 | QFGYVYGMSAIGCLVIHALLNLMSSSGVSYGCVASVLGYCL   |
| Q8R088 | ILTTEKQNFLLFDMTTHPVTNTEKQRLMKKLQDSVLERWV    |
| Q92600 | RLTSLGVIGALVKTDEQEVINFLLTTEIIPCLLRIMESGSE   |
| Q2YDL1 | RYLTDRKPEFINCQSKIMGGNSILHSAADSVTSAVQKASQA   |
| Q9NWX6 | RLQGTLAADKNEILFSEFNINYNLPMYRKGTVLIWQKVD     |
| P0DMS9 | ARDDMDFTELIIVTDDKGTLANDFWSGKDLSGNKTRSCKAPK  |
| P12401 | WSRFSMTFSDEDRSISEYYNLFYCLRRDSRKVDMYIKILT    |
| P25311 | VHWTRAGEVQEPPELRGDVLHNGNGTYQSWVVAVPPQDTAP   |
| P02970 | AYFVLPMKNAEGTKVGSVKVNASYAGVFGKGGVTSADGELF   |
| Q9JHL0 | LFSHLEGPESPRYQNFYKGSNQEPDAAVVDPIPTNYYNWGC   |
| Q3SZ19 | VSDVQELIRRKEEIEAQIKANYEVLESQKIGMNEPLVDCE    |
| Q99578 | FKELIFQVRHTYEIPLVLVGNKIDLEQFRQVSTEEGLSLAQ   |
| Q6NZQ8 | ASQTSTLNEKSPGRSASRSSNISKASSPTTGTAPRSQSRLS   |
| Q96D70 | ERLLRFFSVSPQAVYTAMLDNSFERLLHAVCQYMDLISAS    |
| Q8K1A5 | HLINYIIFLRITPFLPNWFINITSPVINVPLKVFFIGTFLG   |
| P39039 | EKLANMEAEIRILKSKLQLTNKLHAFSMGKKSGKLFVTNH    |
| P0DMC8 | LKIKYKRHFPSLSIIVLTMNNNPAILSAVLDLIDIEGIVLKQ  |
| Q9BUP3 | FSKVTLIGRRKLTDFDEEAYKNVNQEVVDFEKLDDYASAFQG  |
| P19437 | LVTAGIVENEWKRMCTRSKSNVLLSAGEKNEQTIKMKEEI    |
| Q32KM6 | RSGWGRMYYSNGDIYEGQWRNDKPEGEGMLRLKNGNRYEGN   |
| Q9CPZ1 | SNGYDILTILPNENINRDPGNPQDEEFLDCHTENDYYVRKI   |
| Q86UF1 | VVGVLMLLTFCGCIGSLRENICLLQTFSLCLTAVFLLQLA    |
| Q9P013 | EHTTSSSVSKKPRLDQIPAAALDADDPLTDEEDEDDEEESD   |
| Q9CR35 | SDEENVQVLKIAQVFKNPKFNSFTVRNDITLLKLATPAQFS   |
| Q7YS81 | RLKKVNEAFEALKRSTLLNPNQRLPKVEILRSAIQYIERLQ   |
| Q0IIG8 | VKLDNWLNELEYCTRNDIVNMLVGNKIDKENREVDREGL     |
| P15530 | RGSQQQELVSEEGRIVQTQNGSVYTLTIQNIQYEDNGIYF    |
| P53518 | NNAKDILYVKPYSEKKIDISNRIKKIKWAMIDDAGAKTKL    |
| A5D7C3 | YVIFSLEIKADAHVRGVGENIKLRCTFKSSSITDKLITID    |
| Q8N1N2 | ACLACVIMTAIGVLIICLVNNGKSANSSIVIQLSTNDGEC    |
| Q86TN4 | ALADGIPFFRSANGVILTPGNTDGFLLPKYFKEALQLRPTR   |
| Q99KJ5 | GAPQRPLSTLSAPKATLILNSIGLSLKLQAQPLTFSRGGG    |
| Q9NWU5 | EVLLEAQDMAVRDHNVFRSNLYIAESTSGRGQCLKRIRYH    |
| Q8BGZ2 | SSAAFRTAGTTPYKVPPTQSNTAPPYPSFSPNPYQTAMYPI   |
| Q61335 | LLVIDAVREILKYDDVTEKVNQNNPGAMEHFHMKLFRAQR    |
| Q9BRQ5 | VHLFALMVSTCLLPHIEAVSNIHNLNSVHQSPHQLRHRYVE   |

|        |                                            |
|--------|--------------------------------------------|
| Q3T178 | PELYEEVKLYKNAREREKYDNMAELFAVVKTMQALEKAYIK  |
| Q15691 | VYSTSVTSDNLSRHDMLAWINESLQLNLTKEQLCSGAAYC   |
| Q60753 | QTDSSISFLPHLEAKIRQTHNLARLLTKYAEQLLEEVVQQQ  |
| Q99J99 | AFFDIDRCSDHSTSPYDHMLPNATHFADYAGSLGVSAATHVV |
| Q9BS92 | FRTYYLKPSNMNAFMENLKKNIHLRTSYSELVGFWSVEFGG  |
| P15947 | EDEPSAQHRLVSKAIPHPDFNMSLLNEHTPQPEDDYSNDLM  |
| P59542 | VTSFLMLFAIYFLCIIITSTWNLRTQQSKLVLLLCQTVAIMY |
| Q5TBK1 | HAEKPSRMNRNQDRNNALFSNNARYWNSYTEFPNRRAHGGF  |
| P50053 | KEDSEIRCLSQRWQRGGNASNSCTVLSLLGAPCAFMGSMAP  |
| O95661 | ELICKIKGNLHKFPPIVLVGNKSDDTHREVALNDGATCAME  |
| Q9UH92 | VTALKIMKVNYEQIVKAHQDNPHGEDQVSDQVKFNVFQGI   |
| O75431 | HLYTILTTQLTNDLSEKVKYNSLLAFCCRREQHYFEDRG    |
| O95297 | LLTAGVSALEVYTPKEIFVANGTQGKLTCKFKSTSTTGGLT  |
| Q9R0U0 | PTGRPRRSRSHSDNDRFKHRNRSFSRSKNSRSRSKSKSQPKK |
| Q6NZB0 | MTFYSEVKQIEKRDSVLTSKNQIERLTRPGSSYFNLNPFV   |
| P48739 | WGLQSKVENFIQKQEKRIFTNFHRQLFCWIDKWIDLTMEDI  |
| Q9H560 | SLAEKLLSHHANIEALNEEGNTPLLFAINRRQQIVEFLLK   |
| Q9UM22 | CQAPQQWEGRQVMYQQSSGRNSRALLSYDGLNQRVRLDER   |
| P09936 | LFNNVDGHLIELDGRMPFPVNHGASSEDLLKDAAKVCREF   |
| Q8MJ50 | NPLHEAAKRGNSWLRECLDNRVGNGLDKAGSTALYWACH    |
| P51157 | IYGAQGVLLVYDITNYQSFENLEDWYTVVKKVSESEETQPL  |
| P56371 | GTGKSCLLHQFTEKKFKDSDNHTIGVEFGSKIINVGGKYVK  |
| P61213 | FVNTVPTKGFNTEKIKVTLGNSKTVTFFHFDVGGQEKLRPL  |
| Q8WU68 | MGECTRGGFCNFMHLRPI SQNLQRQLYGRGPRRRSPPRFHT |
| Q865R3 | PPVTDWAWYKITDSEDKALMNGSESRRFFVSSQGRSELHIE  |
| Q8K201 | FFFHLLIFAFCAAVVYVYHNKRKIFLLVQSRKWRDGLCSK   |
| P11900 | IPKIEMASYDGSVITPSPFTSNTAMDIAVKVKNSGDNTELG  |
| Q06186 | CKCLPGYHGHRCHGLTLPVENPLYTYDHTTVLAVVAVLSS   |
| P13789 | REAEDGPVEEFKPKPRPFMPNLVPPKIPDGERVDFDDIHRK  |
| Q2T9Y1 | LGVGTPGRIKELIKQGGLHLNPLKFLIFDWNWRDQKLRMM   |
| O35943 | GRAAVGLLPRTASRASAWGNPRWREPIVTCGRRGLHVTVN   |
| P20764 | TILGQPKSDPLVTLFPLSLKNLQANKATLVCLVSEFYPGTL  |
| A2AIP0 | RGRAHKDPKPLSPLPRPTFQNLGLLPHYGGYVPGYKQFQGG  |
| P13810 | YNDGYVSTTVTLRQAHLIGQNILGSYNEYIYVVA PPNLF   |
| Q0IIC4 | MMPNRRNMYAVQNSAGPYFNPRSRQRI PRDLAMCVTPSGQ  |
| Q96E09 | TGGSPAEGGGSGGGGLRRSNSAPLIHGLSDTSPVFQAEAP   |
| Q9NY12 | CKCTTDENKVYPFNAPVYLENKEQIGKVEIFGQLRDFYFS   |
| A1A4M6 | ICREGNGVSVWRPSVEFFGNLYKGEVNGTPEQVWDCVK     |
| Q3T0E1 | VVANKDMEPEMVCIDSCGRANGMGVIGDGLLFKVTLGLIR   |
| Q9KIP8 | KVHAGVRSAMIDGSHFFAENVKLVKSVVDFCHSQDCSVEA   |
| A0PK84 | LRHDHHCFFTGNCIGSRNMRNFILFCLYTSLACLYSMVAGV  |

|        |                                             |
|--------|---------------------------------------------|
| Q9Y6H3 | AHVDWFTNIRHLACSEVRAANLSGDCSLVNEIFRLHFGLKQ   |
| Q9H6K1 | VEGNFNPFASFPQKNRQSDENNLDKDPGGSEFDSISKNTWAPA |
| P27814 | LVRVLVQKPSREKCCVFIQENLNKTTDCSVNLECPQDWLLH   |
| Q9CQ52 | EGQEQVIPINAGDLFVHPKWNMCVSCGNDIALVKLSRSAQ    |
| Q8NC54 | GASVVPHPSPPTPLSQEEADNNEDEPSIEEEDLLMLNSSPSTA |
| Q15520 | NDCKLKERIEENGYNTYASFNWQHNGRQMYVALNGKGAPRR   |
| Q99JB4 | LLIQDQEELRFLDLSIKEKYNSFWIGLSYTLTDMNWKWING   |
| Q32NC0 | PASVFRTPTSQQSVSTCSSKNTSKTKKHFSQLKMLLSQNES   |
| Q9HA47 | EQKAKALKGQYNFDHPDAFDNDLMHRTLKNIPEGKTVEVPT   |
| Q9DAM2 | KKQELRDLFHDFDITGDRLLNYKEFKLYTIFCTDKSIDRKK   |
| Q96DN0 | LEDEDIESIDATKLSRFIEINSLHMVTEYNPVTVIGLFSV    |
| Q9EQI8 | TAERILATLSENMEAKFLGNAPCGHYKFKFPKAIQTESDL    |
| Q99M03 | EQAQAQLSELDDLASMFPSSENELIVNDQLALAEKDCIEKR   |
| P70339 | TRTGDDDDPHRLLQQLVLSGNLIKEAVRRLHSRQLQLHAKL   |
| Q80ZI2 | EQHASGRFHCSWCWHTWQSANVVILFHMHLDRARVGSVRM    |
| Q8N9E0 | AMARWRGPTQSVGPTIQDYLNRPRTWEEVKKQLENKKTGS    |
| Q8IWD4 | QEIEDRIIDEDEEVEADRNVNHLPSLVLSDTMKTGLKREFD   |
| Q9R1A9 | ASEITGLSSESMLMCGKAGFNGAVVRTLQGFLSRQEGPICL   |
| P62906 | ILGPGLNKAGKFPSSLTHNENMVAKVDEVKSTIKFQMKKVL   |
| Q810P2 | NIAGGPGPAMHTRPEPSVYQNRSPLFMAKRFGCPLDHTHR    |
| Q86W74 | QGNTALHLCGHVDTIQFLVSNGLKIDICNHQGATPLVLAKR   |
| Q5T700 | VTILGLPSCTPGAQACITLTNRTGFLCHDQRSCIPASGVCD   |
| Q3TDK6 | TTLTQGDALSQADVNLKMPRNNQLLHLAFREDKQWKLQQIQ   |
| Q6ZNR8 | ARPGLOGLLARPVLALRGEENQRGRGRAWRRASFRLVGD     |
| Q8K2J7 | RCTTEAEQEVEEEKVEKIELNDSINENSDTVGQIVQYIMKN   |
| Q9H2R5 | DECAPHSQPWQVALYERGRFNCGASLISPHWVLSAAHCQSR   |
| Q9H3S4 | DVIVTLGGLAGRFDQIMASVNTLFQATHITPPFIIIIQEEES  |
| O70401 | ILLAVGIWKVSLENYFSLNEKATNVFVLIIGTGTVIILL     |
| O75631 | IGDVSQASQILNAYLVRVANGTCLWDPNFQGLCNAPLSAA    |
| P43431 | IYEDLKMYQTEFQAINAALQNHNHQQIILDKGMLVAIDELM   |
| P0A1V9 | EGSLAISAEQEQIAFLRKLRYRNLPRFVEHQRLVKDLMIVEA  |
| Q9H115 | AEAERVKASHSFLRGLFGGNTRIEEACEMYTRAANMFKMA    |
| Q8TCB7 | SCREFEDQKLTMLEAGCGVGNCLFPLLEEDPNIIFAYACDFS  |
| O43423 | ELNRNAPS DVKELALDNRSRNEGKLEALTFEFELEFLSKI   |
| Q9UNI1 | DNVAAGYDIALRLAQSRTLNSYVQLGVLPOEGAILANNSP    |
| P13661 | EGFIIISKSGHKYVFSALTGNLGSLNLTSSIKAKKNAITILN  |
| Q6P8I6 | KPVIIGISTYNVVPFEAGQYFNKIQCFCEEQRLNPQEEVDM   |
| Q15631 | SVNSVTAGDYSRPLHISTFINELDSGFRLLNLKNDLSLRKY   |
| Q2M2T8 | EKVFSYLTITPLEQCTENVLNMTLRDDQKDDNLKEIFTQRN   |
| Q9BSN7 | TVQRLVAAAVLVALVSLILNNVAAFTSNWVCQTLEDGRRRS   |
| Q9R0X0 | KLMYVMHNSEYPLSCFALFENGPCLIADTNFVLMVKLKF     |

|        |                                            |
|--------|--------------------------------------------|
| Q8IUE1 | KHRFKAYPSEEEKQMLSEKTNLSLLQISNWFNARRRILPD   |
| Q8NE22 | DEDVLGTLKVFQALFLNDFNKQSEILSMLPESVKSKYQDL   |
| Q91WE2 | ELIEKQRREEELEELKEYRSNLNKVGISAENKEVEKKLAVK  |
| Q8N9W6 | PRYGTVIPNRIFVGGIDFKTNESDLRKFFSQYGSVKEVKIV  |
| Q9CQG0 | AIKDSTQRVENQVFHMRWFYNYARMRKVADFFLLQSNYTYV  |
| Q9Y3A3 | DEYENETFLCHRFTKFMKYNLMSKDNLIVPILEEEVQNSV   |
| Q17QQ2 | EIPGAKIFKSSSGNISLYCCNLFDLPRANIGKFDRIWDRGA  |
| Q91ZT9 | LHYAAERDEACVEVLELEYGANPNALDGNRDTPLHWAAFKNN |
| P02722 | KQIFLGGVDRHKQFWRYFAGNLASGGAAGATSLCFVYPLDF  |
| Q2TBU3 | NLMGSVRKDIESYKSGSGVNNRRELFLEKEDHLRNSDRLI   |
| Q9Y2W7 | LQAQTKFTKKELOSLYRGFKNECPTGLVDEDTFKLIYAQFF  |
| Q9R9D6 | ITEDLTPTISLEDYCADWATNPPDVRVKRMLIKRVATMVRD  |
| Q9HAV5 | SCITCAVINRVQKVNCTATSNAVCGDCLPRFYRKTRIGGLQ  |
| Q8CEZ0 | EAEFYNIASLVRLVKERIRDNENRTSQGPVKHVYVQLQCQE  |
| P50194 | IWCSGTSVKAVDFIHYDEKNNENWLLQVKNRDNTENSSSSK  |
| O35417 | DLYKRYGGFLRRIRPKLKWQKRYGGFLRRQFKVVTRSQE    |
| Q2TBG8 | MKQTI SNACGTIGLIHAIANNKDKMHFESGSTLKKFLEESA |
| P20336 | GQKESDQNFDMFKILIGNSSVGKTSFLFRYADDSFPA      |
| Q0IIN9 | LPTCSLLTSSPPLEGCHRLNEEAQVQRGFRPIAVELEFEN   |
| Q5VWC8 | NAYLFIYYLIQFCGHSWIFTNMTVRFFSFGKDSMVDTFYAI  |
| Q8N755 | LEYPIILIAQDVILLLCIFHFNQVQATPYIAVLVSSWFIL   |
| Q2YDE4 | MTGMTADRSRQVRARYEAAWYKYGYEIPVDMCKRIAD      |
| Q9NZQ0 | NMPKRKEPGRSLRIKVISMGNAEVGKSCI IKRYCEKRFVSK |
| O95843 | DLLEIVYKSFDFS NVLRVICNGKQPDMDTSSKSPDKAGLG  |
| P15946 | GVLLDRNWVLTAAACHVSYQYNVWLGKTKLQREPSAQHRMV  |
| Q9JIT2 | VQOSKRRVQLFGLHSLFPCLNDAQKVSDFTISILRDQIVPN  |
| A4FV84 | GKNKVMVALGRSPSDEYKDNLHQVSKKLRGEVGLLFTNRT   |
| Q96MF7 | EFATLDRQLNHVYKAVQSTINHVKKEERPEKIPDLKLLVEKK |
| O75832 | AASAGRDEIVKALLGKGAQVNAVNGCTPLHYAASKNRHE    |
| Q9D504 | NENMVKFLKKGADVNASDKNHRTAIMIALIVEPTSSVKLL   |
| Q00724 | SVDEKGHMSATAKGRVRLLSNWEVCADMVGTFTDTEDEPAKF |
| Q6P0X2 | CCQVFAAIEDYQHYYHMMHGNTCSFCNRAFSPGHLLDVHIL  |
| A6QPN6 | NAQLTDALRPPHKYVPWVVVNGEHMKDAEHLHLVCRLYQG   |
| O95843 | YPSGLQTLHEFKTLGLQGLNQKANKHIDQVYNTFDTNKDG   |
| Q9ET43 | LLFFLAGTVSLSPSIWAI FYNSHLNKRFEPVFTFDYAVFVT |
| Q9BY27 | KAGVAGFYVTTNPQELMLQMNLELIRKLQQRGCRAGNAAL   |
| Q8VEJ3 | NTDGDGAYAEGTTKWPABENRPQKPKTKKSQSSKGQEGE    |
| O60725 | NHSLEYTVAALSSWLEFTLENIFWPELQKITWLSVTGLLMV  |
| P52556 | VLLGTRNDLSPTTVMSEGAQNIVAAMKAHGVKVVACTSAF   |
| Q9QXP7 | CYRCCDPSTPVYQTIPPPQINITILKGEKDRGRGLQGY     |
| P01881 | SSSLDITYTCVVEHEASKTKLNASKSLAISGCYHLLPESDGP |



|        |                                            |
|--------|--------------------------------------------|
| Q9NVP2 | VLITCTYHGQEFIRVGYVNNYLNPELRENPPMKPDFSQL    |
| A2VDH3 | QLGAGAFRSAGRLVKLSLANNHLAGVHEAAFESLESQVLE   |
| P01375 | DKPVAHVVANPQAEQQLQWLNRRANALLANGVELRDNQLVV  |
| P68252 | KELEAVCQDVLSLLDNYLIKNCSETQIESKVFYLMKMGDY   |
| Q2KIN3 | NTCTIDGFLMLLYVILNENENFPRELSLHLGREFVDCFLYL  |
| Q99598 | EAVSFQHFIKTRSLISMDEINKQLIFTTEDNGKENKTPSSD  |
| Q12981 | ESEKQLLQEVENHKKQMLSNQASWRKANLTCKIAIDNLEK   |
| Q32KL9 | INQAARKFMEENERLKRLLKNYGKEEHLILEAENKLEEDK   |
| Q3LUH2 | LSDPQNGNWQWIDQTPYKENVRFWHQNEPNFSAEECASVV   |
| Q8BGJ9 | QTADGSHCHVSDVEVQEHYDNFFEEVFTTELQEKYGEIEEMN |
| O70401 | GIWGVSLENYFSLLEKATNVPFVLIGTGTVILLGTFGC     |
| P19141 | EFPGYRGRQYVFERGEYRHWNEWDANQPQLQSVRRIRDQKW  |
| Q9BPW5 | ALVVRFLTKRFIGDYERNAGNLYTRQVQIEGETLALQVQDT  |
| Q9Y4Z2 | ELALSQRRSRKKANDREERNMHNLNSALDALRGVLPFTP    |
| Q62276 | KTAKIEDETTQVSRATQGEQDNYEMHVRAANIVRAGESLMKL |
| P61027 | YRGAMGIMLVYDITNGKSFENISKWLRNIDEHANEDVERML  |
| Q504M8 | FKDGAFLAGTFISTVGDIFRNKVLVDVGMKVKLQIWDTAGQ  |
| Q96CF2 | TIEFQREALENSHTNTEVLRNMGFAAKAMKSVHENMDLNKI  |
| P53518 | NNIVEKLRWHKNGKYLVLKNNTPYYSIFSEVFFDSKVNNA   |
| Q96PB8 | SMCPKGCLCSSSGLNVTCASNANKEIPRDLPPETVLLYLD   |
| Q9D676 | QTFCMAQEAQLARFDNEKELNFMRYKANFDSWIGLHRESS   |
| Q6NZB0 | TDEEIKRFRQLSILVHPDKNQDDADRAQKAFEAVDKAYKL   |
| Q8WUJ1 | TRGLEANKLQLQEKQTFPPCNAEWSARGSLWCSQKSGGV    |
| Q8N1L9 | NGLLTQTDPKQQRQLKKQKNRAAQRSRQKHTDKADALHQ    |
| Q96S44 | LRCRRAGISAPVVFFVDYASNCLYMEIEGVSVTVRDYIQTST |
| O88630 | GMLKSIHSMNTLANRFPVAVNSLIQRINLRKRDRSLILGGV  |
| Q9GZP9 | SLVFLGQAFITMLVYVWSRRNPYVRMNFGLLNQAPFLPW    |
| Q5VWC8 | ITSQEEVQEKYVVCVLFVFNLLDMVRYTYSMLSVIGISYA   |
| Q5VY80 | RWCAVQQQVDEKTFHLYDCGNKVTVPVPLGKKNLVTMAWK   |
| P79124 | VSIETDAETGDSRVVVGECPPNPESISLTVLHRRPGLLNDV  |
| Q62000 | KLKLSFLYLDHNDLESVPPNLPESLRVIHLQFNSSISLTD   |
| Q4KXC9 | LINENGEFIKELKYPNHNKINKILPFKNCFAHPTLMFKKDV  |
| P15018 | GSANALFILYYTAQGEPPFNLDKLCGPNVTDFFPPFHANGT  |
| O60635 | LVPVPAIKKDYGSQEDFTQVWNTTMKGLKCCGFTNYTDFEDS |
| P32850 | IRKTQHSTLSRKFVEVMSEYNATQSDYRERCKGRIQRQLEI  |
| Q92637 | KLVYNVLYYRNGKAFKFFHWSNLTIKNTNISHNGTYHCSG   |
| Q2HJI8 | VEEAFFTLARDIMTKLNRKMNDNSSSGAGGVPKITENRSKK  |
| Q6P926 | KENEIKELQQVISQQKQNFNRHISDFRIKQKQETYMAQVLD  |
| P04973 | KELDEWYARQDEQLQKTKANNRVADEAFYKQPFADVIGYVT  |
| Q0VD00 | LSGEKALIEEVFPETGDMCNSVNAGWNQDPHTVIRFPPLNG  |
| P0CW71 | KRLAQFKAASVKDVVSDNVVNMRLRGFHEGLATEYQATHDLW |

|        |                                              |
|--------|----------------------------------------------|
| P0CL83 | HDKHREVRVKCVKALKGLYGNRDLTARLELFTGRFKDWMVS    |
| Q8BVD7 | YYFSYDITLANKHLAIGLVHNGQYRIRTFDANTGNHVDVSG    |
| P30042 | NLSAANHDAAI FPGGFGAANKLSTFAVDGKCKVNKEVERV    |
| Q96NL8 | KETLRSTETFKKEDDLSLINEILEEPNLDKKPSKLSKSS      |
| Q5JQF8 | MWSQRDPSLRKSGVGNVFIKNLGKTI DNKALYNI FSAFGNI  |
| Q3SZC6 | RIHLELRNRTPAAVRELVLNCKSNDBGKIEGLTAEFVNLEF    |
| P11900 | PSFTSNTAMDI AVKVKNSGDNTELGTLVPLSFGA AVATIF   |
| Q6QRN8 | LLFIVLVFFALFII FKAYLINCWNCYKINNRNMPEI AVY    |
| P23185 | SSSHNFSRERLPSGINFC DNKLSIRTIEKLLVNAFSSPDP    |
| Q9H2K0 | TAEDTQNEGKTKKNKTA FSNVGRKISQRVHIHLFDEKGNL    |
| O00584 | LQNCTEPGEQPSPKQEVWLANGAAESRGLRVCE DGPVFPYP   |
| Q9D0L6 | NYRGLHDVLSPSKSEASGQGNRYQH DSSRNLI TKMQELTSS  |
| P05538 | LLVCSVTDFYPAQIKVRWFRNDQEETAGVVSTSLIRNGDWT    |
| O18968 | VAEVVYLIFRACARRAQRRSNPPSRKSGGGF GHRLSPEYKQ   |
| Q8R0I4 | PSGAAHLEGPAASSWEYS DPNSPVILCSYLPDEFVDCDAPV   |
| Q96BH3 | NEYGGNSLRKPCIFPSI YRNNVSDCMEDESNKLWCPTEN     |
| Q99944 | SLRESQGVC SKQTLVVPLHYNESYSQP VYKPYLTL CAGRRI |
| Q61955 | PKVGQKCI ISGWGTV TSPQENFPNTLNCAEVKIYSQNK CER |
| Q9EQI8 | RETEADKKNDRTSLHRKLD RNLVLLVREKLG DQDVWMLPQV  |
| P06730 | QANLRLISKFD TVEDFWALYNHIQLSSNLMPGCDYSLFKDG   |
| Q2YDG7 | NRFKYIWRLLRPDQQA IILANDSAILEVHRDTHPKAFECET   |
| Q6SP97 | CKRNEDVKKAE EYDNYIQENL KKAAMKRLSDEEREAVLQG   |
| Q02591 | CRRKRRHRTI FTDEQLEALENLFQETKY PDVGTREQLARKV  |
| A0JN86 | SDPQIAICLDCLRNNGQSGDNVVKGLMKKFIRCSTRVTVGT    |
| Q28145 | VVEFEVSPQSTLETKE SKSFNCRIEYEKTDRAKKTALCNFD   |
| Q8BH49 | RLVVRELEQQLAAMREGSPANALPANPSPVLTQRPKENGWV    |
| Q9JL25 | DILSAEEVMQWSQSLEKLLANQTGQNVFGRFLKSEFSEENI    |
| Q8WW43 | LLAYVSGLGFGIMSGVFSFVNTLSDSLPGPTVGIHGDS PQF   |
| P16114 | NSHDNSAFISSLIY LISKENNEKIEI SYISSVSFFSDKV    |
| P00766 | GASGVSSCMGDSGGPLVCKKNGAWTLVGI VSWGSSTCSTST   |
| Q9H8W3 | TESNVNAYEECPSGI PIDMWNKFQELHKKHSEQKSTTSRFR   |
| Q9UKW6 | CGEYLYFIIQNIRTQ GYSFFNDAEESKATIKDYADSNCLKT   |
| Q61039 | RPVKRRGTANR KERRRQTSINSAFALRECI PNVPADTKLS   |
| Q9R9D6 | EI IKNLLSLRMPVLGADREWNAIHRLRDVGVDTMYGVAFGE   |
| D3Z3K2 | KAENHLKQMEKMYMQQIQSKNIELTSMKGEVISMKKVLEEY    |
| Q9NY72 | VVEWFYRPEGGKDFLI YEYRNGHQEVESPFQGR LQWNGSKD  |
| Q7L4S7 | CAPDNLNASIESQGIKMYINEVCRETVSRCCNSFLQQAGL     |
| Q0VCT4 | WLLFFLVTAIHADLCRPAENAFKVRLSIR TALGDKAYAWD    |
| P10749 | SLVLSDPYELKALHLNGQNI NQQVIFMSFVQGEPSNDKIP    |
| Q99JB4 | KWINGTAFNSDVLKITGVTENGSCAAISGEKVTSEGCSSDN    |
| O89101 | VGKPDGTSKECVFIEKVL ENNYTALMSAKYSGWYVGF TTKG  |

|        |                                               |
|--------|-----------------------------------------------|
| Q9D7L8 | VLSLPQGR TSSVLT VNGRTENY I LDTQHGVQASLECAVQNH |
| Q9BXY0 | FCRNEYSLTGLCNRSSCPLANSQYATIKEEKGCYLYMKVI      |
| Q8IVN8 | PQGQDCGH TYVPAFITTS AFNKERTRQATSPHWSTHTEDAG   |
| Q9WTP6 | RRITGR LIHPKSGRSYHEEFNPPKEPMKDDITGEPLIRRS     |
| Q0VCQ4 | VKLAKQNTNKAKDSL RRVRTNAINKVKKSKDKASEDTIRLI    |
| Q9WU03 | KAVTGPCRAAFPRWYDTEKNSCISFIYGGCRGNKNSYLSQ      |
| Q99943 | VAQTLTLDV RVVWFPEGTRNHNGSMLPFKRGAFHLAVQAQ     |
| Q8VIM0 | TLTTERNGSETQTLVTLHNNNGTKISTWADEIKDSGETIRT     |
| O43692 | KAQLDSADIPKARRKRYISQNDMIAILDYHNQVRGKVFPPA     |
| P17981 | TQSVERYIQISLDSPKRKKSNFNCFYSGSTQAANVSSLGSR     |
| Q8IUX1 | SPSLEDAKLRRFMVIEII EKNFDYLRKEMTQNIYQMATFGT    |
| Q9H3Y0 | PWRCDGPTCSHYTQM VVASSNRLGCAIHTCSSISVWGNTWH    |
| O94760 | YDKLTVPDDIAANCIYLNIPNKGHVLLHRTPEEYPESAKVY     |
| Q8N9N7 | IESLPELLIGKFTLLKSLSLNNKLT VLPDEICNLKKLETL     |
| Q9BUT1 | QKSGNI INMSSVASSVKG VVNRVYSTTKAAVIGLTKSVAA    |
| Q8TB68 | FCSFLRRRLKRRQEERLREQNLRAL EPLELEGLS LAGSPP    |
| Q99N94 | KSVGRNKLLSQGLAVYAS PENRKLFEEEKSLRREGKLEKIQ    |
| A5D7F5 | MFQTFYLSIVDLCENGGKRPNTNSASFTKEQADTIRIRIS      |
| Q9CZJ6 | SADALGLEKERPEEKAAAAENPLVFLCARCRRPLGDSL TW     |
| Q6PI78 | QEKLEAPPPTPGQLRYVFIHN AIPFIFGFLDNAIMIVAGT     |
| P46738 | PDDVAGKVEWQRAGNRLKGVNPTPFYINLSTLTVGGKEVKE     |
| P06493 | FHGDSEIDQLFRIFRALGTPNNEVWPEVESLQDYKNTFFKW     |
| Q1RMQ5 | RSPSSPLPPLPEDEEGSEVTNSKSRDVYKLPPTAPGPPGD      |
| P01127 | NANFLVWPPCVEVQRCSGCCNRRNVQCRPTQVQLRPVQVRK     |
| Q924T2 | TAQACGEYAHTRYFKGGLLTNAQLLFGPSVRLPDLIIFLHT     |
| Q0VCC1 | MVFGGVVPIYPYRDIRRTQNAEGFSTYVCLVLLVANILRI      |
| Q8BHX3 | GGNKQALEEAAKADR DITEINNLTAEAIQTPLKSVKRRKVI    |
| Q9D1J1 | ESVLCVKPEVHVYRIPPRATNRGYRASEQLDQPSWSGRLR      |
| Q9NYK6 | MLQDSGATLCRNSVLWPHSHNQAQKKEETISSPEANVQTQH     |
| Q9D2R4 | DIRVGEHDLDAIVQAKDKVNEVTFKQLHLEQVEQILKEQ       |
| A1E959 | PEIAVMSTGEEIPYLQKEA INFRHDSAGVFM PSTSPK PSTT  |
| Q9BXJ2 | GITTSYPEERLPIIFNKVLFNEGEHYNPATGKFI ACPGIY     |
| Q3TLP5 | RRLNGAQARELGLVN HAVAQNEEGNAAYHRALALAEI LPQ    |
| A8MXK1 | LLSVEYSCHGVPTIEWTYSSNWGTQKIV EWKPGTQANISQS    |
| A2VDH3 | SLNVAALDALPALRTVRLDGNPWLDCDCFALHFSWIQENTS     |
| Q2T9Y6 | VEDGVNLSLEHLQPYWEE LQNLVQSKKIVAIGTSDLDK TQL   |
| Q92482 | FGFAVTLGIL IAGQVSGAHLNPAVTFAMCFLAREPWIKLPI    |
| Q8BXL7 | GLYKYMFKDEYCI LILGLDNAGKTTFLEQSKTRFNKNYKG     |
| Q46669 | IVFLSFYAQADLTDFRVATWNLQ GASATTESKWNINVRQLI    |
| Q92882 | MSDTNWWKGTSGRTGLIPSNYVAEQAESIDNPLHEAAKRG      |
| O43731 | FALVFTTRYLDLFTNFISIYNTVMKV VFLLCAYVTVYMIYG    |

|        |                                              |
|--------|----------------------------------------------|
| Q8WWC4 | STEEKPQQHQKTKMIVLGFSPINWVRTRIKAFLIWAYFDK     |
| P79099 | AGAALLHEITPPAIRGDLAVNALNNNSTAGQAVTVLFLTL     |
| A6NKC4 | PTPVWFHVLVFLAVGIMFLVNTVLWVTIRKELKRKKKWNLE    |
| Q6P2H8 | EAETRQPVVILLGWGGCKDKNLAKYSATYHKRGCVIRYTA     |
| P05231 | KETCNKSNMCESSKEALAENNLNLPKMAEKDGCQSGFNEE     |
| Q00731 | EIEYIFKPCVPLMRCAGCCNDEALECVPTSESNITMQIMR     |
| P43487 | KFEECRKEIEEREKAGSGKNDHAEKVAEKLEALSVEETK      |
| Q2HJ38 | EPGLGMEHCDTLNVSLQMGSNKGASQRGMTVYGLPRQVYDP    |
| P12402 | VIRTIKARIYWSGLASLVSNDEVDVRHSAFYKLFMCLYRDS    |
| Q9JJK0 | SQSDLCSSDQEEEEEMVFGENEDGLEEMDLSDLPTSLFAC     |
| Q9BRQ6 | VDEEERVRLQGVRLSENVVNRMKPESSPPAPTSTSTFGLQ     |
| Q8IWZ4 | EEHWEKLLKKMQSLWEKACENQRNLNVETTRISHWKAFGDI    |
| Q9NYK6 | YEEVKTILSKINWIVQYAQNKDLSDSECSKNPQHHLFNF      |
| P24668 | EKDKEKNEVALLERLRPLFNKSFESTVGGSDTYSYIFRV      |
| Q5EBJ4 | PVDILHSKCDEEEEEEEVWNEEINEEDVDECAEEDEVRV      |
| P05531 | SNVKLEQLWKTNKQERKKINNKFCQYITTFQKFMQVQKF      |
| Q8TDQ7 | MDEYVGLPRNHPEYHSYMWNNFFKHIDIDPNAHILDGNA      |
| Q9ERI2 | LGDSGVGKTSVLYQYTDGKFNKSKFITTVGIDFREKRVVYRA   |
| Q00187 | DVIDNGASSFVPLSHYLISNVQVALLQDMGHELVVHTVVT     |
| P20036 | GQAFSFEAQGGLANIAILNNNLNTLIQRSNHTQATNDPPEV    |
| Q8VCR7 | PVRFSVLLHGIRESSETWQNLGTLQRLAEAGYRAVAIDL      |
| B1AXV0 | DDVMACVHDDNGRVRIQHFYVVGQWAKEVQRNPARDEEGVF    |
| D3Z4I3 | RAAAERACKDPNPIIDGRKANVNLAYLGA PRIMQPGFAG     |
| Q6IPU0 | SFQAIHQFNLEGWSSKDLKNQLGHLESELSFLSTLTGINI     |
| O55234 | SRATAGAYIASQTVKVKVIEINPYLLGTMAGGAADCSFWERL   |
| Q9Y272 | SFEVQRLRQQILDTKSCLKNKTENVVPLVICGNKGD RD      |
| Q15907 | YRGAVGALLVYDIAKHLTYENVERWLKELRDHADSNI VIML   |
| Q810I0 | LEMGRALAIKYQELREVAENCADKLRLEKSMHRWSPQCA      |
| P0CW71 | ATHDLWQPAMFNALATDKLFNYWSPA WNDLDGIGGEVKS YL  |
| P58417 | SNIKTVKLNLLITGKIVDHGNGTFSVYFRHNSTGQGNVSVS    |
| A6NJR5 | FFLALYLANDMEEDDEDPKQNIIFYFLYGKTRSRIPLIALFQ   |
| Q0VD59 | KVYVQLWRRLKAYNRVIYVQNCPE TSKRNIFEK PALPEFNF  |
| Q5BKY1 | KLYLSDNHLNLSLPELGQLQNLQILALDFN NF KALPQV VCT |
| P59796 | KVDCNKGVTGTIYEYGALTLNGE EYIQFKQFAGKHVLFVNV   |
| P63011 | DWSTQIKTYSWDNAQVLLVGNKCMEDERVVSSERGRQLAD     |
| Q9HBJ8 | FSMRKVPNREATEISHVLLCNVTQRVSFWFVVTDP SKNHTL   |
| P41439 | YFPTPAALCEGLWSHSFKVSNYSRGSRCIQMWFDSAQGNP     |
| P04116 | LTVVWLLVFACSAVPVYIYFN TWTCQSIAAPSKTSASIGT    |
| P52803 | NSLEPADDTVHESAEP SRGENAAQTPRIPSRLLAILLFLLA   |
| P00551 | TAIPGKTAFQVLEEYPDSGENIVDALAVFLRRLHSIPVCNC    |
| Q60654 | DISWIGLSYDNKKKDWVIDNGPSK LALNTTKYNI RDGLCM   |

|        |                                             |
|--------|---------------------------------------------|
| Q9BTZ2 | VSKTALLGLTKTLAIELAPRNIRVNCIAPGLIKTSFSSRMLW  |
| Q96HS1 | VWDPNWRREPLSLINVRKRNVESGEEELASKLDHYKAKAT    |
| Q7YRD0 | ENWLKIFTFIVEHLGLQIRFNLSRNVEIRTCKETKDVSAI    |
| Q8VCH9 | VTMFGWFTMVISYVVVYVRQNQEDARRHLEYLKSLSRQKK    |
| Q3UTA9 | SGCDYALFKEGILPMWEDNRNKQGGRWLLSIDKQLRHFELD   |
| Q15400 | RISSNIQKITQCSVEIQRTLNQLGTPQDSPELRQLQKQKQ    |
| Q148F6 | LTLQGDALSQADVNLKMPRNQLLHFAFREDKQWKLQIQD     |
| Q9UF02 | RYTAEDMYRPHPGFYRPRLSNCSYSGQFLHPDAAVVRGRSP   |
| Q96M11 | DGEVLVTDESTISESESGTENDQDLWDLRQRLMNVQFQEDK   |
| Q3ZBG9 | QIELLEVLIGFETNNKYEIKNSLGRQRIYFAAEDTDCCTRNC  |
| Q3SYR2 | EIKKPPASERLPINPRDLDPNAGRFRVRYQFTPAFLRLRQVG  |
| P20356 | EERQAVADGLLIQPLIGSLPNIMAPEWFDGLKRAAEGRRLM   |
| O60258 | LQLLILCCQTQGENHPSPNFNQYVRDQGAMTDQLSRRQIRE   |
| Q5TGJ6 | AAAAAATAVDEESPLVAVENGSAPESEPLVCEPPQPEEEEE   |
| Q5JQC4 | ILIENTRQLSRLMVGPHAAARNLWGNLPPLLLQRLGAGAAA   |
| Q9NPC8 | ETSYCFKEKRSRVLREWYAHNPYPSPREKRELAEATGLTTT   |
| Q9BVV7 | YTEKLHRSSAKRLLLPYIVLNKACLKTEPSLRCLQYQKKT    |
| Q9WTN0 | AIWSRPESTQVQNILRQRTENIDIKKYCVQYLEDVGSFAYT   |
| Q8IWT1 | VTLKDDDRITLVGSTKEKMNNISIVLRDLEFSDTGKYTCHV   |
| Q3SYR3 | TWYVSSSPCAACADRIVKTLNKTKNLRLILVGRLFMWEEP    |
| P67778 | FDCRSRPRNPVITGSKDLQNVNITLRLIFRFPVASQLPRIY   |
| POC2W1 | ELRSCALVCKHWYRCLHGDENSEVWRSICARSLAEALRTD    |
| A2A5I3 | TCSSINWVWNTWQQAVYLVCNYAIGKNWIGEAPYKAGKPCS   |
| Q9NVL8 | LQNKEVETPSAGRVDFAFNQNLLEKTSYSLARLQDNKALE    |
| O95661 | SDDTHREVALNDGATCAMEWNCAFMEISAKTDVNVQELFHM   |
| Q5TD97 | DLCEEQFMSRDDYPFCVDCYNHLYANKCVACSKPISGLTGA   |
| A6NDL7 | LLGAHVTAATDLPPELLGNLQYNISRNTKMKSKHLPQVKELSW |
| Q9X2V8 | LNEEHLIRKEISNLSIIFHLNIFKSDCLTYSYALKRILNSR   |
| Q0VD27 | PAASGNGADDPQWMIQAVVDNVYQMSLDRKTTALKQLQGH    |
| P04095 | KKKINAVRNGVNALMSTMLQNGDEEKKNPWFQSDNEDAR     |
| P55918 | PVFCDMTTEGGKWTVFQKRFGNSVSFFRGNWYKLGFGGRAD   |
| Q7TQB0 | MIMACLAASRFCLHGI AVLNNFLASAMFWTIKNYFSILWDF  |
| O55239 | KEPGAFDWSPVVTYVCDLEGNRMKGPEKEEKLRAIKQVLK    |
| Q9CQE1 | YWTVEFGGRTNRVFIWKYDNFAHRTAVRKALAKDKEWQER    |
| P68543 | FSGQGHRLGSATPKIVSKAKNIEVENKNNLSAVPLNNLEPI   |
| Q91ZT9 | ADCVELLLEKGAEVNALDGYNRTALHYAAERDEACVEVLE    |
| Q14390 | VRSPVSEILFNDEMDDFSSPNITNEFGVPPSPANFIQPGKQ   |
| Q86UP9 | GLSMLLIACIICFTLFFFCNTATVYKICAWMQLTSAACLV    |
| O95744 | KDYGMDLIEVSGNGCGVEEENFEGLSLSALKHHTSKIREFA   |
| A0JLT2 | KLSNFLPDLPGMIDLPGSHDNSSLRSIEKPPILSSSFNPI    |
| P40617 | GLDCAGKTTVLYRLQFNEFVNTVPTKGFNTEKIKVTLGNSK   |

|        |                                             |
|--------|---------------------------------------------|
| Q9D338 | VPEDERRFLSPEFIPPRGRTNPLKFKIERKDMLDRRKVLPI   |
| P32885 | TETGNQHKYQTRVVSANANKVNLKFEEAKPVLEDQLAKSIAN  |
| Q3UFY7 | HTYKNSSVCENSSESYFQQLQNKTNII LLGDSIGDLTMADGV |
| Q07817 | HLEPWIQENGGWDTFVELYGNAAAESRKGQERFNRWFLTG    |
| O88696 | ASMGSLLLAAGSPGMRHSLPNSRIMIHQPSSGGARGQATDIA  |
| Q8BH93 | GFWGPMSGGPWAPGIAGQHPNMPYRSPGPYPTVPPVSGAP    |
| P53516 | VEWQRAGNRLKGVNPTPFYINLSTLTVGGKEVKEREYIAPF   |
| A2VDP0 | ELLSQEFLLLTLEQKNITVENDMRVNKDSLTDLYVQHAIPL   |
| Q32L08 | CDISDTALLHLCNCRKLLKLNKSSKENRISITSKGIKAVA    |
| Q9ERS4 | LLSATCNTFITTLEECVKIANAKFKPEMFQLPHPDPLVSPV   |
| Q64008 | ASLEHTKQWLTDALENDPSNVLLFLVGSKKDLSTPAQYSL    |
| Q3SZ62 | NEEIVPQIKEGKRVLIAAHGNSLRGIVKHLEGLSEEAIMEL   |
| Q9UNI1 | GTEQYVSVQKIVVHPYWNSDNVAAGYDIALRLAQSVTLNS    |
| P70661 | PGGGSNGDWGSIYSPVSQAGNLSPTASLEEFPGLVQVPSSPS  |
| P04233 | RSCREDQKPVMDQDRDLISNNEQLPMLGRRPGAPESKCSRG   |
| P50876 | LETAISCPDAAACKQGHLENEIECMVAEIMQRYKQLQFE     |
| Q3SZ22 | KRQRLTHLSPEEKALRRKLNKRVAAQTARDRKKARMSELEQ   |
| A8MT27 | LSIFLAWDVDIGSDNTDSRANRLNNGDNLWIDKLPKERTKL   |
| Q3T0S3 | DGPSFVKIFGPMSSAMQFVNVGYFLIAGAVLFALGLGFC     |
| Q9BQI4 | CHSHTVVQDYSYFFFLRMDENYNLLPHGVNFQDAIFPDTQE   |
| Q9GZP9 | LVYVWSRRNPYVRMNFGLLNQAPFLPWVLMGFSLLLGNS     |
| P20036 | FGQAFSFEAQGGLANIAI LNNNLNTLIQRSNHTQATNDPPE  |
| Q9CRA4 | NPLNLVPFYTGARHHDFFHMFIGNYASTFTWWDKLFGTDA    |
| P49788 | EKKKRQEDYLLYKQMKQLKNPLEIVSIPDNHGHIDPSLRL    |
| Q62000 | VIHLQFNSSSLTDDTFCKANDTRYIRERIEIRLEGNPIA     |
| Q8HZJ5 | AMGFLLMFDLTSQQSFLNVRNWSQLQANAYCENPDIVLIG    |
| P05837 | DESVVWQINPFPDYPPFALNQSGSNTNTSDKLTIWNDLSP    |
| P25789 | TMDVSKLSAEKVEIATLTRENGKTVIRVLKQKEVEQLIKKH   |
| Q9D710 | LSAIVMMKNRRSITVEQHVGNIFMFSKVANAILFFRLDIRM   |
| A2AFE9 | LRSGIMMEVTPGNARMANRGNMAHVSFPLGSPRHMPMDNWQQ  |
| Q969W9 | IFDSLMDSARLGGPCPPSSNSGISATCYGSGGRMEGPPPT    |
| O60828 | GLPPSWYKVPDPSCGLPYWNADTDLVSWLSPHDPNSVVTK    |
| Q3SZ45 | THVNTGRNLHSHHFTSPLSGNQEVSAFGEEGEDYLDDWTV    |
| Q60930 | YQKVCEDFDTSVNLAWTSGTNCTRFGIAAKYQLDPTASISA   |
| Q1LZA1 | GYDGENGPEHWGKLYPIANGNNQSPIDIKTSETKRDPSLKP   |
| Q8K2Q2 | KQDPAVCALHTDKSVFLGFLNLYFQNNPCAFDFGLCNPIIR   |
| Q9CWJ3 | LACAGHLPENLRHDSRTFVINTSDSGSSQTESPSSKYSGFF   |
| Q8BWY2 | DGTPYSFELFEI I IDPTNLRNRDCMTIFNGKAYSKDCKELR |
| Q96CJ1 | PVTVPKGSKKPYLKECILIINHDTGECRLEKLSSNITVKKT   |
| Q8C1T8 | CPSGWIGFGSKCFYFSEDMGNWTFQSQSCVASNSHLALFHS   |
| Q6PK04 | PAPWPGLRSKEKKKVNCKPNQDEQEIPFRLREIMRSRQEM    |

|        |                                            |
|--------|--------------------------------------------|
| Q62189 | PQQLMPGQMPPAQPLSENPPNHILFLTNLPEETNELMLSML  |
| A6NEH6 | GQAGDGPKPAELPPTPGTERNPEMELEKVRMEFELTRLKYL  |
| P13634 | LYPIANGNNQSPIDIKTSEANHSSSLKPLSISYNPATAKEI  |
| Q9ESL9 | TSECIFREQFEENWYNTYSSNIYKHGDTGRRYFVALNKDGT  |
| Q9D3F7 | GVSLPDFELLSDPEDHLCANLMLQLQESLSQARLGSRRPA   |
| Q8C1T8 | GLHRASTQHPWIWTDNTEYSNLVLRGGGECGFLSDNGISS   |
| P28651 | EGVEWGYEEGVEWGLVFPDANGEYQSPINLNSREARYDPSL  |
| P16563 | YQQTGPCASCNNCENGLCTNSCDFEDLLSNCESLKTSAGC   |
| P46926 | DEYVGLPRDHPESYHSFMWNNFFKHIDIHPTHILDGNAV    |
| P35695 | EAVNGVFLCKSSSKLACATNNLARASKEYLPASTFKIPNA   |
| Q497H0 | TPSTSNSQSDLFSEETTSDDNNTSVTTPTLSPSQSLPTEL   |
| Q9D8B3 | QEELDKNLEISGPETVPLPNVPSVALPSKPAKKKEEEDDD   |
| O35075 | EGTVNLQLSAKSVGVFEAFYNSVKPIQIINSTIDVLKPGKI  |
| A2VDN0 | VIELNTTIVLPPRNFWELLMNVKRGTYLPQTYIIQEEMVVT  |
| Q56JV9 | VKTTDGYLLRFLCVGFTKRRNNQIRKTSYAQHQQVRQIRKK  |
| Q3TQI7 | KIKNIISTEDAKARLLAEQQNKKKDSFVPTNMAVNYVQ     |
| Q9NW81 | MWNGRIRGIHRLGAAVAPEGNQKKKRTILQFLTNYFYDVEA  |
| P0C2W1 | GYVALLGSDDDQSWGWNLDNLLHNGEVNGSFPQCNNAPKY   |
| Q6ZS02 | SHSFMHSMDPQLERQMETTQNLVDSYMAIVNKTVDLWVGA   |
| Q58CY8 | LGIGIWMVDPTGFREIVAANPLLITGAYILLAMGGLLFL    |
| O43291 | CLKKCATVTENATGDLATSRNAADSSVSPAPRRQDSEDHSS  |
| Q2HJ97 | GEALSKNPGYIKLRKIRAAQNISKTIATSQNRIYLTADNLV  |
| Q9Z0G9 | ALLTLVPVSWSAANTIIRDYFNPLVPEAQKREMGAGLYVGWA |
| Q9ULW3 | SLHNTPMGARRRSPFRYDLWNLKYLHRTWHLSEHLAFER    |
| O35740 | PQHAFNALMGEHIHYGAGNMNATSGIRHAMGPGTVNGGHP   |
| Q06186 | LFKVAFSSKPGGLATPSKERNGKKKKKGLGKKRDPCLRK    |
| P35762 | DVKQFYDQALQQAVMDDANNKAVVKTFFHETLNCSSNAL    |
| P29972 | IGLSVALGHLLAIDYTGCGINPARSFGSAVITHNFSNHWIF  |
| A2RRY8 | WEKEKANNLKNEIKEVEELDNQVPMPLHGFFSTGASNFS    |
| Q9GZU7 | KICVVIDLDETLVHSSFKPVNNADFIIPVEIDGVVHQVYVL  |
| Q17R00 | QKLEEEGSDSQKKKGTHHINRWRIATKQASPEEIDVTSDD   |
| Q99619 | GVATALAPLQTDHYAALLGSNSESWGWDIGRGLYHQSKGP   |
| Q9R061 | PVFVDQEQSISLMSVGFLEENPDEAVVWRGPKKHALIKQFV  |
| Q9WUJ8 | GLNKMMYQSCLSKFECLLGLNSNVGIRD LAVQFSCTEAVNL |
| Q1RMR4 | LLLIGDSGVGKTCLLCRFTDNEFHSSHISTIGVDFKMKTIE  |
| Q3SXB8 | NDLEKEGAFVYSDRSPMQTFNKWRSGEPPNAYDEEDCEVMV  |
| Q9DCX8 | NKRRSVRFISSEHVPMIEIENVIKAAGTAPSGAHTPEPWFV  |
| O43760 | LAFLASAFFLVVDAYFPQISNATDRKYLVIIGDLLFSALWTF |
| Q60898 | YSLSVRHRQVKHYRIFRLPNNWYIISPLRFTQCLEDLVTHY  |
| Q99PM9 | NLIVQHIQDILNGGLSKRQTNGYLNQYTPSRKRQASESSSR  |
| O75841 | NNGVTKTWRMLQDNCCGVNGPSDWQKYTSAFRTENNAD     |

|        |                                            |
|--------|--------------------------------------------|
| P33781 | KQLTLSTAVEAAKGEVAITLNGQALKVGSASPTVVTVASNK  |
| Q32L50 | PPAMNSVSLRCSGDGLSDGNQTLHWQAIGNPRCQGTWKKV   |
| P62823 | QRLGELGFEEFFETSADNINVKQTFERLVDIICDKMSESL   |
| Q99LP6 | LEVADILEKATQSVPKEEISNNPHLKSLEYGLVMTEVQIQ   |
| Q3T0S3 | TAHNMSVQGCFKQLLYDIRTNAVTVGGVAAGIGGLELAAMI  |
| Q99581 | ALYKLPAGLAPLPPFGLSKLNLMAASAGVAPAGFSYWPFGG  |
| P54709 | GPVYVACQFPISLLQACSGMNDPDFGYSQGNPCILVKMNRI  |
| Q60595 | LSNMFMEQQKFIHETLTLQKNRMEEFKSLCEKYLEKLEVL   |
| O75636 | NSNCAVIVHGAWWYASCYRSNLNGRYAVSEAAAHKYGIDWA  |
| P04390 | PSEPNNKIAIDIKTTYTNKENEKIKFTLGGYTSFTRNNTKN  |
| Q2TA29 | RWLKELRDHADSNIIVMLVGNKSDLRHLRAVPTDEARAF    |
| Q2KHU4 | IDDSVASLVIAQLLFLQSESNKPIHMYINSPGGVVTSGLA   |
| P28065 | LHGIELEEPPLVLAANVVRNISYKYREDLSAHLMVAGWDQ   |
| Q7Z692 | MLQGSQAALYIQKIPEQPQKNQDLLSVQGVPDFQDFN      |
| O43736 | LLGNCYLMLPNTSIVMPFKNLVELFGKLAGRYLPQTYVV    |
| P60174 | LGSSAMAPSRKFFVGGNWKMGKQSLGELIGTLNAAKVPA    |
| P11912 | MVSLGEDAHFQCPHNSNNANVTWVRVHLGNYTWPPEFLGP   |
| P43166 | SPSLQPLELSYEACMSLSITNNGHSVQVDFNDDRTVVTG    |
| Q5VST6 | QYSSREKDAIECFMTRTSKGNRIACMFVRCSPNAYTLLFS   |
| Q3ZCD8 | PQNEEIRAVGRKRRERSMSENAVRQNGQLVKTDSDMYGISNI |
| Q5SRD1 | MNGLRLGLKETQNMASKPRNVQILNMVTRQALWANTLGS    |
| Q08DT3 | LPEDSLNSLIKLIQADILKNKLSKQMDVVKENYQSTL      |
| Q8NAU1 | PASEPVLFKTPREAEKMASKNKDEVTMKGMRNQQLRTGEV   |
| Q9CZQ6 | TKRHHFMIQKLLILLSYGYTNGLDDAHSRCLNTIKDPTSA   |
| Q9TT92 | KPWSKCTSATITTEFLDDGHGNCLLDLPRKQIPGPEELPGQT |
| Q9CQX3 | LPYYGVTPVVSTYPSDHLDRNFRDAFRHGLLSGGILSFLEH  |
| Q8N5S3 | HVGRGRIYYAKFINTNARTYNEFPYIDPKKGPEIQGDWWS   |
| P52840 | VPVKGIPLIKYFAETMEQLQNFTAWPDDVLISTYPKSGTNW  |
| P35330 | FEVYIWEKQIVEATESWKINCSTNCAAPDMGGLETPTNKI   |
| Q61599 | KDTFVLKEGIEYRVKINFKVNKDIVSGLKYVQHTYRTGMRV  |
| Q16878 | PRTLADLIRILHQLFAGDEVNVEEVQAIMAYESDPTWAM    |
| Q9CQ89 | SGIVTKEMLDVSKKMAPCFVNFSRLQIQISDIQAEIYQNNLE |
| Q9Z1Q5 | EVDETSAEDEGISQRKFLDGNELTLADCNLLPKLHIVQVVC  |
| P15428 | QLRDTFRKVVDFHGRLDILVNNAGVNNEKNWEKTLQINLVS  |
| Q9D8T0 | PLHEGTLVFAASYDDPATKMNEETRKLFSSELGSRNAKDLAF |
| Q3ZCU0 | MAEELNLDKETVRLILKENLNMRKISAKVISGVLKETEPHY  |
| P63032 | LLVSGDENCAIFEVSARKNTNVNEMFYVLFMAKLPHEMSP   |
| Q15040 | PPQIYHEKQRRELALHALNNVFQDSNAFTTRDTLQEIFQRL  |
| P22387 | KCIYQQLVGRKLRLEAISNSIKASFRVAKLKAELYRDQK    |
| Q9JM90 | MLEKNPSWGNMILRPGSDSKNYSITIRQEIEMPRIKHFKVT  |
| Q9JM90 | FYAVSRKEATAMLEKNPSWGNMILRPGSDSKNYSITIRQEI  |



|        |                                            |
|--------|--------------------------------------------|
| O00322 | YIFECASCITSYTHRDYMVSNPSLITKQMLTFYSADTDQGG  |
| Q9Y535 | WQFERKLNDSIAEELNKKLANKVVYVNLGICLCLFDITKLED |
| Q9Z2Y8 | TKPADMVEIAYGHGQRTFGENYVQELLEKASNPKILSSCPE  |
| Q99463 | IIIFKKQRKAQNFTSILIANLSLSDTLVCMCIHFTI IYT   |
| Q17QJ5 | CGAFGADDWNLNIYFNCTDSNASRERCQVFPSCCTKDPAD   |
| Q6UXN2 | WTAVQKSHYTIWDKPNAGFFNITMIQLTQNDSGFYWCGIYN  |
| Q61937 | SIEKGGSLPKVEAKFINYVKNCFRMTDQEAIQDLWQWRKSL  |
| Q86WA6 | ALIAAAKYPSYIHKMVIWGANAYVTDEDSMIYEGIRDVSKW  |
| P46638 | SDLRHLRAVPTDEARAFAEKNLSFIETSALDSTNVEEAFK   |
| P02763 | HFAHLLILRDTKTYMLAFDVNDEKNWGLSVYADKPETTKEQ  |
| Q8BL95 | HKQLMLFYHRRQEELKKLEENDDDSLNSPWADNTALKRHF   |
| Q923S9 | DNVEKFLDLACRLISEARQNTLVNNSPLPGEKKSISYL     |
| A6H6X4 | GHYFIDRDGLFRHVLNFLRNGELLLPEGFRENQLLAQEAE   |
| Q9BXJ4 | SLATHFSNQSGIIFSSVETNIGNFFDVTGFRFGAPVSGVY   |
| Q53H96 | SLSTLEELPPTNTRVLRVLPNLPCVVQEGAIVMARGRHVGS  |
| Q47456 | LLLQRTGEVLPRLISSLVWMMNFSDTNVIDVAVRRLRSK    |
| P40673 | KGKSEAGKKGPRPTGSKKKNEPEDEEEEEEEDEDEEED     |
| Q3ZCC4 | QRIERNQLALERRQAKLLSNSQSLGNDLSVNTPTQTSEA    |
| D3Z690 | PGYFPNELRAIFREQVRLIQNAIESRIDCQRHCGIYQYET   |
| Q3T0A6 | NGFPSDASANSLLLEFQDENSNQSSVSDVYQLKVDSSSNS   |
| Q8K1A0 | LLEQYPTREPHIAACMLYTIHNTYDDIENKAVADLGCQCVL  |
| Q6PHW0 | HYYNEISVSIACGILLALQNAGLVTVTTPLNCGPRLRVL    |
| Q14002 | PYECEIQNPVGASRSDPVTNLNVYESVQASSPDL SAGTAVS |
| P80219 | DIMLLKLRKADITDKVSPINLPRSLAEVKPGMMCSVAGWG   |
| Q28110 | QDRKSKIFSYQRTNFSIPRANLSHSGQYHCTAFIGKMLHSS  |
| P14436 | LLGQPNTLICFVDNIFPPVINITWLRNSKSVTDGVYETSFL  |
| P09326 | TSIQGHLVHMTVVSGSNVTLNISESLPENYKQLTWFYTFDQ  |
| P62827 | PNWHRDLVRVCENIPIVLCGNKVDIKDRKVKAKSIVFHRKK  |
| Q3KNJ2 | QQVWHEQVDTSVVSQRAKELNKRLTAPPAALLCHLDEALRP  |
| P14190 | AYFVLPKNAEGTKVGSVKVNASYAGVLGRGGVTSADGELL   |
| Q2KI06 | DEMKRAMISMPFTPGMVELLNFIRKNKNKFCIIISDSNSV   |
| Q3T021 | LR AISHRLLEKVNAPRQPLYNIQVRKGSLEIISFPKALTAL |
| Q9JI58 | ILHLSNINKTMTSGDPGETANATEVGECLTQPLKDLQCQLR  |
| Q6SJQ5 | YWKSCIEILVETDASEQLVKENRVSIRDDQTDFFITVTMEDL |
| P02522 | SLRPIKVDSQEHKITLYENPNFTGKKMEVIDDDVPSFHAHG  |
| Q99990 | LLQQDRCLARPQESAARENGNPGQIAGSTGLLFLNLPQSVH  |
| P23150 | TWLRNSKSVTDGVYETSFLVNRDHSFHKLSYLTFFIPSDDDI |
| Q99614 | LGKLDLGNLVRPFGLSTENFQIKQDSSTGYSINQVQNP     |
| Q60692 | FNGGVVLGADSRTTTGSYIANRVTDKLTPIHDHIFCCRSGS  |
| P13972 | AIGDKLWLQFIPLIYGEVVNLWLFCKNSNVIVDYCRGL     |
| Q9D8U2 | FLRLEPMTPNWFLNLSAPILNIPVQFFFSVLIGLIPYNFI   |

|        |                                               |
|--------|-----------------------------------------------|
| Q8N2K1 | KLIFPREFFPKPPSIYMITPNGRFKCNTRLCLSITDFH PDT    |
| Q9GZX9 | ECMLCLGALWDECCDCVGM CNPRNYS DTPPTS KSTVEELHE  |
| Q61599 | TKYKKTLLGDVPVADPTV PNVTVTRLSLVCD SAPGPITMD    |
| Q9JJJ3 | GLEPIVIGLLI IIVISCSLGLNSGCAMN PARDLS PRLFTALA |
| P04230 | LVRDSRPWFLEYCKSECHFYNGTQRVRL LERYFYFNLEENLR   |
| Q8BR70 | LMFAWSVVASTAFLADSQPPNRKALAVY PVFLFYFVISWMI    |
| Q5HZI9 | HGIAEYYRGMVPI LFRNGFGNVLFFGLRGPIKESLPTATTY    |
| Q9BUB7 | VFTTFYAKTKSLLVNPVLF PNR EDYIHLMGYDKEEFILYME   |
| Q1RMU1 | DAIPDNKGLEPSRETPEQRENKQQQK RRVQDKQKSVSVS      |
| Q2KI69 | ESISAQLEEASSTGGFLYTQNSTKRS IKERLMKLLPCSAAK    |
| Q46668 | GELRNWQIMPGRPNTIQFRNVDVGT CMTSFPFGKGGVQLS     |
| Q9NPI5 | MKSREELFREVEDIQNSLLNRSQESAPS PPARPARTQGGPR    |
| O95050 | KEEKLRAAVKRVLKCDVHLGNPLA PAVLPLADCVLTL LAME   |
| Q969E2 | AQTEWNTGTWRNPPSREAQYNNFSGNSL PEYPTVPSYPGSG    |
| Q9CQD7 | NAHCCQSDGCNSGVSPPP LNNRTENGLMCPSC IAPFQETCP   |
| A1XBS5 | LTARNREAKQLTQLERTRQRNPSDRHVI SQAETELQRAAMD    |
| Q99JY3 | GKTGAGKSSTGNSILGEKVFNSGICAKSITKVCEKRVSTWD     |
| Q9CR48 | FGFFLTYIRDFQKITLRVEANLHGLTLYD TVPCPVNNERTP    |
| P33781 | AMATVSGSVLAAVTNGQLTFNWQGVVPSAPVTQSSWAFVNG     |
| Q17QJ2 | GLGLFCTVADRLLQFP I IQQNAWL RALSDNSVHCVIGMWSW  |
| P08883 | DSGGPLVCNNKAYGVLTYGLNRTIGPGVFTKV VHYLPWISR    |
| P70122 | HTQLEQMF RDIATIVADKCVNPETKR PYPVILIERAMKDIH   |
| Q6PHN7 | YVVPVYLLWKGGAYTPEPLCNFQWALLSTGLMFFYHFSFLQ     |
| Q96DR5 | QKAQEAEKLLNNVISKLLPTNTDIFGLKISNSLILDVKAEP     |
| Q9H6K1 | EAWPPGVCLKYVGGDQFGHVNMMVRSLEPQE IADVSVQMC     |
| Q9UEU0 | ANETLAEMEEELRYAPLSFRNPMMSKLRNRYR KDLAKLHREV   |
| P08246 | FCGATLIAPNFVMSAAHCVANVNR A VRVVLGAHNLSRREP    |
| O08604 | DLCQKLRDKVSN TKVDTHKNGYPHLQVTMIYPQSQGQTPS     |
| Q9Y691 | SVWTEESQCTLLNASITETFNCSFSCG PDCWKLSQY PCLQV   |
| P53811 | PAFVRMIAPEGSLVFHEKAWNAYPYCRTIVTNEYMKDDFFI     |
| Q9ZIS7 | PKTKRNERFLKSFVKG DYYQNLIVETDRVRSAGLTFPNDFY    |
| Q02878 | EKKKKEKVLATVTKPVGGDKNGGTRVVKLRKMP RYPTEDV     |
| P97930 | GHRAELLRFPERSTEIGKLLNSYLEKKTELEDHSVHLLFSA     |
| Q7RTU5 | KPGPFGGGLALGPAPRGTMNNFCRALVDRRPLGPPSCMQL      |
| P78417 | YAGLKEEFRKEFTKLEEVLTNKKTTFFGGNS ISMIDYLIWP    |
| O18968 | LLYPGYAMVRLVKCDAYPCPNTVDCFVSRPTEKTI FTVFML    |
| Q9WVS0 | IRLLTGEINGSADHRMFSFHNGGVQISCKY PETVQQLKMRL    |
| Q8IUQ4 | QHKSITTLQGEDIVFLATDINLPGAVDVMVMQSCFGHFHML     |
| P97440 | RYIKEVPRHLRQPGIHPRTPNKFKKYSRRS WQQIKLWKVA     |
| P57735 | SDLSQAREVPTEEARMFAENGLLFLET S ALDSTNVELAFE    |
| Q9BZD7 | FIIWRCQLQKATRHHPSYAQNRYLASRAGHTLPRVMVYRG T    |

|        |                                             |
|--------|---------------------------------------------|
| Q9H3N1 | VLMSSMSALFQLSMWIRTCHNYFIEDLGLPVWGSYTVFALA   |
| P24071 | LPQHQSGEHPANFSLGPDVLDNVSGIYRCYGWYRSPYLWSF   |
| Q9D7S0 | IAAFAITVVDSLNCCTQCYTYNSTCDGQATECNEQSFSCVES  |
| P51959 | DLLSLTQFFGFDTEFSLAVNLLDRFLSKMKVQPKHLGCVG    |
| Q28153 | NNVAAGYDIAVLRRLAQSATLNSYVQLGVLPQSGTILANNTF  |
| A6QNL6 | QYRPRYITGYAVWLVLWVTWNVVICFYLEAGDLSKETDLI    |
| Q6P9G0 | CTPRGRFVHVPPQLPCSDWANDFGKPPWQGSYYEVGRLSAK   |
| Q9HCN8 | LTHVLTGKNLHTHHFPSPLSNNQEVSAFGEDEGDDLDLWT    |
| Q6P9F5 | VTQLRSLVIDLERTAKELDTNTLKNAGDLLNRSAPQKLEVI   |
| Q8BFY6 | PPGGPYGTQPGHYGQGGVFPNVDPPEAYSWFQSDADHSGYI   |
| P26373 | GMVLKPHFKDWQRRVATWFNQPARKIRRRKARQAKARRIA    |
| Q9WTL2 | EDYNFVFKVVLIGESGVGKTNLLSRFTRNEFSHDSRTTIGV   |
| Q9CQY8 | NGTCVSPPTDFKNPTINNMVSNWKIPNSNSEDRHRIFHFVS   |
| P07743 | ELLQQATSWPLAKNSILETLNTADLGNLKSFTSLNGLLLKI   |
| P58466 | ICVVIDLDETLVHSSFKPVNNADFIIPVEIDGVVHVQVYVLK  |
| Q61754 | TPTKWQKPNLDQCVFIKLLPNENCTKPYLHKVTDVMLCAGE   |
| Q1JQA4 | LLGVVMFIVSFIGVLASLRDNLCLLQAFMYILGICLIIELI   |
| Q9BUE0 | GSVLDHSLES LIHRLRGLCDNMEPETFLDHMVFLKGGQA    |
| P08831 | DEPVLLKEMPETPKI IKDETNLFFWEKHGSMDFKVAHP     |
| Q9JL99 | KNGINLSGNTENMNCAYLHNGKIH PASCKERHYLICERNA   |
| Q8NDD1 | I LEQERATMLGAKPPKKS YVNYKVLQEQIKEKKAKEEEEKR |
| Q3ZCA2 | TQFGNKYIQQTKPLTLERTINLYPLTNYTFGTKEPLYEKDS   |
| B1ATL7 | ENVLGGHAPSPLVVSVDKNGNQLHHDMPQLQCLS KPEDDA   |
| Q8WXK3 | HHAAKVKNVDLIEMLIEFGGNIYARDNRGKKPSDYTWSSSA   |
| P18405 | PGDTGYKIPRGGLEFEYVTAANYFGEIMEWCGYALASWSVQG  |
| P61289 | QLVDIEKVKPEIRLLIEKCNVTKMWVQLLIPRIEDGNNG     |
| Q0VD00 | EKALIEEVFPETGDMCNSVNAGWNQDPHTVIRFPLNGYCR    |
| Q8N6N2 | DYARALRYLQEARSREPTDTNVLRYIQLTQLKMNRC SLQRE  |
| Q8JZU6 | SFQSPVKISEIMRSNGFCLANTETIVIDHSIPNGKQDQLDA   |
| Q8HZJ5 | ITTVGIDFREKRVA YNTQGPNGPTGKAFKVHLQLWDTAGQE  |
| P13762 | LAGDTQPRFLEQAKCECHFLNGTERVWNLIRIYINQEEYAR   |
| P97458 | RHRTTFNPAQLEQLES AFGRNQY PDIWAREGLAQDTGLSEA |
| B2RXH8 | NVTNKMDPHSVNSRVFIGNLNTLVVKKSDVEAIFSKYGKIA   |
| A4IFK7 | PPREGPGGREKEALFPRGSNANSNKEEKTIRKLF SFRSG    |
| P63075 | DTFGSRVRIKGAESEKYICMNRKGLIGKPSGKSKDCVFTE    |
| Q8N8J0 | LLTLGLSLLHADVVPNATIRNVLREKIYSTAFDYFSCPPKF   |
| Q9GZU7 | NYVKDLSRLGRDLRRVLI LDNSPAS YVPHDNAV PVASWFD |
| Q28153 | HCVDSQMTFRVVLGDHNL SQNDGTEQYISVQKIVVHPSWNS  |
| Q8BVH9 | AYACDFS PRAVDYVKQHPLYNAERCKVFCDLTRDLDLHV    |
| Q5EA33 | PLHLAAGNRDSKDTLELLMNRYIKPGLKNSLEETAFDIAR    |
| Q9D8C2 | NREQQQLLEVGNNTASARNDIQRNLCCGFRSYNPNDTC      |

|        |                                              |
|--------|----------------------------------------------|
| Q9D6K7 | EDLSWARKLQEQQKVAQR IENKEMPEPDLSPGSI PDYDF    |
| Q9H3R5 | STALKKNLEKISRQSSV LMDNMKHLLELNK LIMKSQQESWD  |
| Q8TAM6 | ADEMTFREGHQWEKIPLSGSNQE IRRQKERI TEQPLKEEED  |
| Q5EAE3 | FEGRKEIWDALKAAAHAFESNDHELAQAI IDGANITLPHGA   |
| Q9NWB6 | SRSRDKERVRKRKSRKSRKRNRRRESRSRSTNTAVSRRE      |
| P41272 | SCSKNWQCRDQECTECDPPLN PALTRQPS ETPSPQPPPTH L |
| A8C927 | HIDLGTGDGRNIYKLAINDQNTFY I GIDPVKENLFDISKKI  |
| Q9DCC4 | LIQAGKVEAKQVLASAPTDNNLCHFRALGCQTTHSNHEVLQ    |
| Q96PB8 | SIPNEIFKDLHQLRVLNLSKNGIEF IDEHAFKGAETLQTL    |
| Q2KIL7 | ERLLRFFSVSPQAVYTAML DNSFERLLLHAICQYMDLISAS   |
| P80206 | LNQSPASLSTQGYGASSLGFNSTTDCLDYKDTASWKLNFN     |
| Q96JC9 | PASPPQPSHQPPYNSRPAVANGTSR PQSGSNQLMNTLRNDLQ  |
| Q9D7X1 | GHYFIDRDGLFRHVLNFLRNGELLLPEGFRENQLLAQB AE    |
| Q56A07 | YQECNNCTEEMFLQFRMKI INLKLERFGRVEFSGNPSKYD    |
| Q3SX24 | FQHGGKDTQFWAGWYGPRVTN SSVVISHRVTRNPPHAMAQP   |
| Q8NH89 | LTAVTIFYGTL SYMYLQPQSNNSQENMKVASIFYGTVIPML   |
| O43633 | KSNNSMAQAMKGVTKAMGTMNRQLKLPQIQKIMMEFERQAE    |
| Q9QZ49 | RIFLLALLTLVISVTTSWFN SLKPSQGHKKEGEKENEKRR    |
| Q03014 | EDILGRGPAAPTAPTLPSPNSSFTSLVSPYRTPVYEPTPI     |
| Q2YDF9 | QTSKYCPMCNIKI HETQPLLNHKLDRVMDIVYKLV PGLQD   |
| Q7Z692 | YEVMPSPVLLVSPISDTRSINPARLP T PPHLQAE PENHQY  |
| Q9UKJ0 | HFHGQSFSYSTRPPSIHKDYVNR LFLNWTGEGESGFLRISNL  |
| Q8VCZ2 | MFITMCFCHYLVALCIVAINYSLVYCF LTRVKRAEGEII     |
| A5PKI3 | NVVGPKICLEDNVLMSGVKNNVGRGINVALVNGKTGELIDT    |
| Q91VK4 | DTYRLRRRSTRRRINKRGKNCNAIRHFENTFVVETLICGV     |
| Q9DCK4 | QELVAHGK LHYKPNRYFKCENCLLRFRTHRSLFKHLHVCID   |
| Q8N2G6 | RGEALSNSVYKGPYGLNNIADGLSSLTEHFSDLTLTSE       |
| P97299 | PATEEAPKVCEACKTKNEDNDIMETLCKNDFALKIKVKEI     |
| P33782 | SDTSVQRFRASVPVRDPETGNVSGQLSFTLNQGM AVSTGKQ   |
| Q32LB5 | DTCENNL CRNKERDKSQRYPNWNP SGTRQLIACNPLYLISV  |
| P32007 | LSFWRGNLANVIRYFPTQALNFAFKDKYQIFLGGVDKRTQ     |
| P40855 | QLQDLGHPKELAGEMPPGLNF DL DALNLSGPPGASGEQCL   |
| Q8IUI4 | DNSDHSSVNIMSAFESPF GPNSNGSQSSNSWKIDSLSLNRE   |
| Q9BVG4 | KGVNNGGEKRADSGEEENTKNGGEGADSGEEKEEGINRED     |
| Q5EAB0 | DGNPERYDVSILLWKLQFDDNGTYTCQVKNPPD V DGLIGEI  |
| Q3T0V3 | ATLERYVETQAKENAYDLEANLAVLKL YQFNPAFFQTTVTA   |
| P21237 | HGQGNLAYPGV RTHGTLESVNGPRAGSRGLTTTSLADTFEH   |
| Q32LJ6 | TRTAF LAEDFNAEEINLDCTNPRYLAAGSSNAVKLSRFFDK   |
| O43315 | CGCVAQAILSRGRFGGVITINVGFSMAVAMAIYVAGGVSGG    |
| P55075 | GAETGLYICMNKKGKLIASNGKGKDCVFTEIVLENNYTAL     |
| P37141 | LNALQEELEPFGLVILGFPCNQFGKQEPGENSEILATLK YV   |

|        |                                             |
|--------|---------------------------------------------|
| P56857 | IIGVSVFANMLVTNFWMSTANMYSGMGGMGMVQTVQTRYT    |
| Q149M0 | YFSINEEKSWSDSRKDCIDKNATLVKIDSTEERDLLQSQLS   |
| Q5E958 | WGSECCTRKTRIIDVVYNASNNELVRTKTLVKNCIVLIDST   |
| Q2KJ15 | CKTRTVIYEIPRSQVDPTSANFLIWPPCEVVKRCTGCCNTS   |
| Q5SSG5 | FSEVCVPTTTRRLYLPAVVMNGHVHDLQILDFFPPISAFFVN  |
| Q61199 | SNIKTVKLNLLITGKIVDHGNGTFSVYFRHNSTGLGNVSVS   |
| A6QPL2 | FVRADRPPSPVNVTVTHLRANSATVSWDVPENIVIGYSIS    |
| Q5VXT5 | FFYTMAALVIYLRFHNLTYTENKRFLPLVDFCVTSFTFFWL   |
| Q5E9A0 | KECQCKRWHDMEVYSFSGLQNVPLAPERRSTLEDYSQSLH    |
| Q8BJU2 | YMDKVNENAKQDLKEGLLYNTENNVLKNAWNI IQAEMRC    |
| Q99JH8 | ACSFTTVWMIYSKFKATYDGNHDTFRVEFLVVPTAILAFLV   |
| Q8WV48 | SALSGVLGDRANPDLRAHPGNAHPGSGATEPRRRPPLKDQ    |
| Q86SE9 | VQHFEDSNDCPRCGNQVHETNPLEMLRLDNTLEETIFKLV    |
| Q9NW97 | YALTAIGLGMVLVGVIMAMWNLVPGFSAAEKPTAQGSNKTE   |
| Q61470 | AKAHYREGCAQSLQKWLHNNIISIVGICLVGGLLELGFMT    |
| Q86WN2 | DLKLIIFQQRQVNQESLKLNLKQLTSLIQQCLPHRKNFLLP   |
| Q2KJD9 | TLLSLYMFCELVTVGWEGQYNFFCQGTNRSGGEADMKIIRVL  |
| Q9DCS2 | DVDQRCLDSIAATTRAQGLSNVKAPLYLDVTWEWEQWGGIP   |
| P28230 | MVLVVAESVWGDEKSSFICNTLQPGCNSVCYDHFPPISHV    |
| Q9CQV8 | RYDDMAAMKAVTEQGHELSNEERNLLSVAYKNVVGARRSS    |
| Q91X79 | DGTEQYVNVQKIVSHPHYWNKNVAGYDIALRLAKSVTLN     |
| Q9BT09 | LHNLVHKGKVVMDIPYELWNETSAEVADLKKQCDVLVEEF    |
| Q9BPW8 | PGPRAGDVASAAAARFYSKDNEGSWFRSLFVHKVDPKDAH    |
| Q9CWU6 | WEDVEQRGRVMGVNSYILKKNMALMTNIFYAAILGYDEGIL   |
| Q3TDE8 | FSSPETDEKLFIACAQCGKTFNNTSNLRTHQRHTGEKPYKC   |
| Q8MJ87 | LKMGYSMRAARQALHQAGNLEEALKILLHNPQLWLNDS      |
| A8MTL3 | QEAQQALVSQDKELSVLRKENGELKFLAILKESPSRYQGS    |
| Q5EA90 | GETFSQLASQDENKLIILPPNPAFGSKAASYSSMGNSRFFF   |
| Q8BGJ9 | NFFEEVFTLQEKYGEIEEMNVCDNLGDHLVGNVYVKFRRE    |
| Q8BJQ4 | IVFAEMPCGRLHLQNLDDAVNGSAWTILLTENFLRDTWCN    |
| Q16594 | KNILITNMSSQNTANESSNALKRKREDDDDDDDDDDYD      |
| P45379 | RRAERAEQQRIRNEREKERQNRLAEERARREEEENRRKAED   |
| P07146 | SSCAPAGTQCLISGWNTLSNGVNNPDLQCVDAPVLPQAD     |
| P14190 | IAFTDYEGASVVLRNPDGETNKKGLAYFVLPKNAEGTKVG    |
| Q5T0T0 | RLKAYNRVIYVQNCPESTKKNIFEKSPLEPNFENKHGYGI    |
| Q3UF25 | VDNFLMRKGTAKLEERGANQDSRNGSKVRYRRAASHEES     |
| P50225 | LALLPQTLQKVKVYVARNAKDVAVSYYHYHMAKVHPE       |
| Q05685 | HKTKPGPEDKLDQCSPWKKNACCSVNTSQELHKADSRLYF    |
| Q2TBH0 | FRGAPMLLAENCSPGPRYSVNPFIKILRTGKDLGPAYSILGRY |
| Q9CR00 | VSDIQDLMRKEEIEAEIKANYDVLESQKIGMNEPLVDCE     |
| Q9CRA4 | VGVFSSASLAVEYVDSLLENPLQEPFKNAWVYMLDNYTKF    |

|        |                                            |
|--------|--------------------------------------------|
| Q8BHI7 | QIGYMI SLIALFTNFYIQTYNKKGASRRKDHLKGHQNGSVA |
| O15194 | LKKQRSRSILSSFFCCFRDYNVEAPPPSSPSVLPPLVEENG  |
| Q91WR8 | HILFVNVASFCLTATYPELNTLQEELKPFNVTVLGFPCNQ   |
| Q2HJ61 | AAVSQSLTDLAKYMTGRLRPNFLAVCDPDWSRVNCSAYVQV  |
| Q91WR8 | LFMAALAQETLNPQKSKVDCNKGVGTGTVEYEGANTIDGGEF |
| P05833 | ALPRLEVAQALYTFILASLPSNFAPISFERLRERLSLISQVK |
| O15266 | KGVILGTANHLDACRVAPYVNMGALRMPFQQVQAQLQLEGV  |
| Q15040 | QDSNAFTRDTLQEIFQRLSPNTMVTPHKKSMLGNGNYDVNV  |
| P43489 | GPGFYNDVVSSKPKPCTWCNLRSGSERKQLCTATQDQTVCR  |
| P56177 | SALANGRAL SAGSPVPPGWNPNSSSGKSGGNAGSYIFSY   |
| Q9D6S7 | FATKKAKAKGKQPQARVTVNRALVEDI ISLEEVEDDMKSV  |
| Q3UTB7 | KQRRSTVPLPLAPGRRAPLENPWRLPQAISPEGRLWSRPPL  |
| P05529 | EGTLKRNFSGGELVSLPQVINLSGTLRNEEVLDLICCFNKL  |
| Q99LS3 | EHPHPLTPGIRELVSRQERNVQVFLISGGFRSIVEHVAAK   |
| Q3UC65 | DRMELLEIAKANAALGTANFDLPASLRAKEASQGTAVSS    |
| Q3U1J1 | RERDEEEEAARGRRRRQRELNRRKYQALGRRCREIEQVNER  |
| Q96G25 | LLSQVADLKNLSG SFICKLENEYGRLTWPSVLDSFALLSGQ |
| Q9H6K1 | TWAPAPDTWAPAPDQTEQDQNRLSQNSVNLSPSSHANNLSV  |
| P31096 | AVATWLKPDPSQKQTFILAPQNSVSSEETDDNKQNTLPSKSN |
| Q08E20 | KTNYRMYSYVTKELPQLVNDNFVDPQRMSVFGHSMGGHGA   |
| H3BPM6 | TQGTFLREYDGRSDLHVGITNTNGVVYNYSAHGVRDGEW    |
| P49788 | RLGKCSARVFFKNQKPRPTINVTCTRLIEKKRQQEDYLLY   |
| Q8IY95 | HLVFVLAFLTGVLCSYPNPNEKCPGNYTNPLKVQTVIIL    |
| P31098 | NRCELSKELMPKAKDKNKHSNLIESQENSKLSQEFHSLLEDK |
| Q6IR41 | MLPLVPGDRVWVRLFKRERENGIYSDDVDTYITFSGHLIKA  |
| Q9CVB6 | LENLPASKDSIVHQAGMLKRNCFASVFEKYFQFQEEGKEGE  |
| P46777 | NRFMDKIYEGQVEVTGDEYNVESIDGQFGAFTCYLDAGLA   |
| Q9UF02 | SATPFPLVSLFFMFIGFILNNIGHIRPHRTILAFVSGIFFI  |
| Q9BQB4 | ATEIIPELGEYPEPPPELENNKTMNRAENGRRPPHPFETK   |
| Q9NQ88 | VDEPLSETGFKQAAAAGIFLNNVKFTHAFSSDLMRKTQTMH  |
| P11034 | VSKSESTQQRIVKQKQIIHKNYNVSNFYDIMLLKLEEKAE   |
| P08217 | SLQYSSNGKWYHTCGGSLIANSWVLTAAHCISSSRTYRVGL  |
| P10412 | VSLAALKKALAAAGYDVEKNNSRIKLGKLSLVSKGTLVQTK  |
| Q8CHJ2 | ASANPTVALQEFLMVEASLPNTLLKLSAQVLGAQAACALTO  |
| P11233 | DLEDKRQVSVEEAKNRAEQWNVNYVETSAKTRANVDKVFDD  |
| A1A4M4 | EQRQVLIRQVQLAKRLNLPLNVHSRSAGRPTISLLNEQGAD  |
| Q3T062 | DEAEPREDDNDSAAEATAGANAGWADAMARILSKKIPESKP  |
| Q8MKI3 | APKIPEGEKVDFDDIQKKRQNKDLMELQALIDSHFEARKKE  |
| A2VE33 | TTASPHQVSGNMECPACYGNNETSCNETRKYGERCVSII    |
| Q2KI56 | EWCDGCEAVLLGIEQQVLRANQYKENHSRTQQQVEAEVTNI  |
| P68002 | GTEFGGSIYQKVCEDLDTSVNLAWTSGTNTCTRFGIAAKYQL |

|        |                                             |
|--------|---------------------------------------------|
| P97805 | TPKDIQTPKSKCGLSKICPNNFFAFKISSGAANVVGPSMCF   |
| P40429 | ISGNFYRNKLYLAFLRKRMNTNPSRGPYHFRAPSRIFWRT    |
| A0PG75 | KLTIGKISKYWSGFVNDVFTNADNFGIHPADLDVTVKAAM    |
| Q5QJU3 | VVSVLSAVTTCCLAFVKPAINNISLMTLGVPCALLIAELKR   |
| Q32KY3 | NMRNSMQELQRNFGHLSMDPNGHSFSSSSVMTYSKVGDEPP   |
| Q9D7W4 | LELAAGILAFVFKDWIRDQLNLFINNNVKAYRDDLDLQNL    |
| P58499 | WVFIAAKGLELPSEIQREKINHSDAKNNRYSWGPAEIQIEG   |
| Q3UV48 | HSFPRSLCLVTSLELLNLNNDIQTLPEDEYLLCRLGRIAW    |
| P78330 | SGGFRSIVEHVASKLNI PATNVFANRLKIFYFNGEYAGFDET |
| Q5E9Q4 | TAVESVTDSSRYFVIRIEDGNGRRAFIGIGFGRDADFDFN    |
| P10036 | LVVEPIDMDSPEIRELEKFAEFKVRRIKLYTQTNVGEAL     |
| O95292 | APRRYCVRPNSGIIDAGASINVSVMQLQPFYDPNEKSKHKF   |
| P31096 | QTFLAPQNSVSSEETDDNKQNTLPSKSNESPEQTDLDDDD    |
| Q8C7N7 | LFRLAYYKLLKASEGLKSNPEETAPSMRLLAYVSGLGFG     |
| Q8CD22 | RVIATDPELLGNLQYNI SRNTKMKCKHLPQVKELSWGVAL   |
| Q8BHL8 | NGMIINVLELGTQQVADLTNLDDYIDAEDLSDFHRTYKNS    |
| A1A4K8 | KYGEVEEMNVCDNLGDHLVGNVYVKFRREEDA EKAVIDLNN  |
| Q8N3J9 | HTGEKPYVCSECGRGSNSSLNLMHQRVHTGEKPKFCEECG    |
| Q9DCL8 | ILATYHPADKDYGLMKIDEPNTPYHNMI GDDDEDAYSDSEGN |
| Q9NPC6 | LGKKVSI PRDIMLEELSHLSNRGARLFKMRQRSDKYTFEN   |
| Q05718 | CAEAGGCLRREGQQCGVYTPNCAPGLQCQPPEKEDLPLRAL   |
| P13598 | LHYETFGKAAPAPQEATATFNSTADREDGHRNF SCLAVLDL  |
| Q9BU76 | QDQFNWEDVKTDKQRENYLGNSLMAPVGRWQKGRDLTWYAK   |
| P21844 | HFTSFRHNSQLCVGNPKMQNVYKGDSSGGLLCAGIAQGIA    |
| Q66JT5 | VYSLPNAPT LADLEDDTQEGNEDHQLEKPHFDCRS AIFELD |
| Q08DY6 | IDVYLCEVEQGSNKTSDNVGTSSSKS KPLEHPQPEKEE     |
| A6QLI0 | TKQCSKITLTEPWPDLDPQNSTFEDQYSIGGPQE QITVQE   |
| Q9H063 | TARSHEFSREPSLSWVNAVNC SLFSAVREDFKDLK PQLWN  |
| Q3T0Z4 | FSLLVLLLLGVTLNAIPLILNFVDEDDQFFENPISCFEWWFP  |
| Q8N6Q1 | EREVSKLVSMNPVEKEHTSQNNEGTPQTQTARLFSKKIFCC   |
| P47758 | YQVLIDSMALKNSP SLLIACNKQDIAMAKS AKLIQQQLEKE |
| Q3SYR2 | FLRLRQVGATVEFTVGD KPVNNFRMIERHYFRNQLKSFDF   |
| Q9JKX6 | AVCMDPGLSNCTTHVVTVT INGDDAGNVRPKPKPGDGEFME  |
| Q2TBI8 | DEVNVPPLTLSQPLLLGIACNETSAGRASAEFYVQC SLTSE  |
| P02746 | PGLAGDHGEFGEKGD PGI PGNPGKVGPKGPMGKGGPGAPG  |
| P07146 | DKIVGGYTCRESSVPYQVSLNAGYHFCGGSLINDQWVVSAA   |
| P15927 | MTAAPMDVRQWVDTDDTSEN TVVPPETVYK VAGHLRSFQN  |
| Q8N2M4 | ELAAGSGALFFIISDLTIALNKFCFPVYSRALIMSTYYVA    |
| Q9D1C9 | PGFQVAYVVFQKPSGVSAALNLKG PLLVSTESH LVKSGIHK |
| O75954 | FWLCGCGLLGVGIWLSVVSQGNFATFSPSPSLSAANLVIAI   |
| P53346 | QQDLPEAAHQAE MNVRGFGNNIHCMAQLLRGSSDPKAAEP   |

|        |                                              |
|--------|----------------------------------------------|
| Q0VC58 | EVTRTWKIVGGVTHANSYYKNGWIVMIAVGVWARGAGGS IIT  |
| Q969Q5 | LEEDRRRRRVDFHVDVQDYADNIKAQLFETSSKTTGQSVDEL F |
| A1A4M2 | LSQRQLNEEERGLRDVAALNGLYRVRVPRRPGAPDGPPEAG    |
| Q60932 | FGIAAKYQVDPDACFSKVNNSLIGLGYTQTLKPGIKLTL      |
| Q9NV56 | FSSSSGLGKASEKSSKDKKNSDLGCKEGADKRRRSRVRTD     |
| Q99N20 | LKIRIQVAGIYKGFCLDVIRNKYECQLGAKQHLESEKMLL     |
| Q43399 | WHDVQVSSAYVKTSEKLGWNEKVTQSDLYKKTQETLSQAG     |
| P51557 | ELSYTQQGEVAMQKALGILNNQEGWKESQQENGDEVLSKM     |
| Q9D0U6 | ESPLSDKCSRKTLFYLIATLNEFRPDYDFSTARSHEFSRE     |
| Q8BH10 | TTVLVAVHLFALLISTCILPNVEAVSNIHNLNSISESPHER    |
| Q8N5S3 | KEDKHQQHKIEDAAITYVSENEEIKHEEKPGKSIHHSKSHV    |
| Q99727 | KQYLLTGQVLSDGKVFHLCNYIEPWEDLSLVQRESLNHHY     |
| Q6QD59 | QSAREQDKSEKQLLLQEEVENHKKQMLSNQTSWRKANLTCK    |
| Q6P5C5 | EPLPCTRS LAEGFLEELRLNAELS QLQFPFVPGVIYNPVD   |
| Q4VA44 | HTGEKPYVCSECGRFSNSSLNLCMHQRVHTGEKPFKCEECG    |
| P14106 | RTINSPLRPNQVIRFEKVI TNANENYEPNGKFTCKVPGLY    |
| Q9D902 | ALGDQILFVSRPDKKILFFNDKSCQFSVDEEFQKLWRSVT     |
| P09326 | RVRLDPQSGALYISKVQKEDNSTYIMRVLKKTGNEQEWKIK    |
| Q9NPL8 | PAFIHAKQQYIEQSQA E IYHNRFDAVQSAHRAATRGFIRYG  |
| P40198 | PSHSSAFMSPLSTAQAPLPNPRTAASTIYEELLKHDNTIYC    |
| Q13007 | CYLVHTLLEFYLKTVFKNYHNRTVEVRTLKSFSTLANNFVL    |
| P47963 | TTGISVDPRRRNKSTESLQANVQRLKEYRSKLILFPRKPSA    |
| Q9R0Q3 | TAVKHEQEYMEVRERIHR AINDNTNSRVVLSFF EALV LVA  |
| Q9Y3A0 | LVSELI PWAVQNGRRAPCVLNLYYERRWEQSLRALREELGI   |
| P54107 | QEEIVNIHNALRRRVVPPASNMLKMSWSEEAQNARIFSKY     |
| A5D7P8 | EPNPDYRGQONKGAHNEQKNNSMNSNNGVTGTGFGPMGNV     |
| Q8NC96 | ARPKLDLGFKEGQTIKLCIGNITNKKGGASKPRTARGGGLS    |
| P30048 | YPLDFTFVCPT EIVAFSDKANEFHDVNCVAVSVDSHFSH     |
| P56597 | RSGFTIVQRRKLRLSPEQCSNFYVEKYGKMF PNL TAYMSS   |
| Q35740 | HPYPHNHYMPDLHPTAGHQMN GTNQHFRCNPKHSGGSSTP    |
| P97760 | CTCEEFCEPCSVEFTLDVRCNEDQTRHVTSRDLISNSPRVI    |
| Q9D6J6 | EVLQVPPMRVYEVATFYTYMNRKPVGKYHIQVCTTTPCLR     |
| P51157 | YKQTIGLDFFLRRITLPGNLNVTLQIWDIGGQTIGGKMLDK    |
| Q969F1 | TEKKEGEENIGGVEWLQIKDNDFS YRPNMICNFLHENEDEE   |
| Q3ZBW4 | RNLAMGVNLTSMKILK CAGNEDIITLRAEDNADTLALVFE    |
| A2RU54 | LASSLQLTETQVKTWFQNRNKKWRQLSAELEAANMAHASA     |
| P54107 | RIFSKYCDMTESNPLERRLPNTFCGENMHMTSYPVSWSSVI    |
| O75015 | APRWVFEEDPIHLRCHSWKN TALHKVYTLQNGKDRKYFHH    |
| Q15181 | VLGILAMIDEGETDWKVIAINVD DPAANYNDINDVKRLKP    |
| Q8IV03 | HSSALERLETKLHLRQEMVNL RATDVRMLRQLLVINESIE    |
| P10767 | VFLGILVGMVVPSPAGTRANNTLLDSRGWGTLLSRSRAGLA    |



|        |                                             |
|--------|---------------------------------------------|
| Q91WR8 | LFGSPEHLFWDPMKVHDIRWNFEKFLVGPDPVPMRWFHHT    |
| P26892 | LLLVMTSAFPPTPGLGEDFKNDTTPGRLLLTPEKTEALIK    |
| P59190 | QQLAKEYGMDFYETSACTNLNIKESFTRLTTELVLQHRKEL   |
| O77834 | ALSIDSVEDHLAWSKDINAYNGEETPEKLPFFIIDDKNRDL   |
| Q32L52 | ENRESTPKLAKLLKLLLWAQNELDQKKVKYPKMTDLSKGI    |
| Q8N682 | FNLVSLVGLVGCFCMGIVANFQELAVPVVHDGALLAFVC     |
| Q8CDW1 | SPRERQRASARLMQSKPGGRNRYKGASSEKPVFTLKSHLPK   |
| Q9QWV4 | RTHNRERDDGEDSLTHADVNFQTMDRMMANMRSGIQELQ     |
| Q8BK26 | PVADWKIFYFLRSLQRNLLHNPCAEEGFVSLDVNGGDEW     |
| Q8BJ25 | AFGNRKNLKHNAVPTVFAFQNPTEVCEPEVGAGGDSGRNMD   |
| Q8N699 | LQCPPLPVETESQLVTLPSSNISPTISTSHLSRPDYWSSN    |
| Q9NWZ8 | VYARYWQHYHQAMAWMQSHHNAYRKAVESCFNLPWYLSAL    |
| Q12829 | LPLPIALRSHLKSFSMANGLNARMMHGGSYSLTTSSTHKRS   |
| Q9H560 | HYAVYNKGTSLAEKLLSHHANIEALNEEGNTPLLFAINSRR   |
| P15947 | ICDGVLQGITSWGPSPCGKPNVPGIYTRVLNFNTWIRETMA   |
| Q8TAF8 | ALGMFLIIGSIIICFSLFFICNTATVYKICAWMLAAATGLM   |
| Q9D9B4 | LGDDLVLPLPHLHTLTLNKNQITDLEYLLDHLAEVTPSLE    |
| H7C241 | MSMRFEEDTYNSFVVGILNIAAGVFNLIAVLQNYDAVIN     |
| Q6PIL6 | KKELQILYRGFKNECPSGVVNEETFKEIYSQFFPQGDSTTY   |
| Q17QB7 | WDTAGQERFRSITQSYYSANALILTYDITCEESFRCLPEW    |
| P04467 | KEFNKAFELYDQDNGYIDENELDALLKDLCEKNKQDLIDIN   |
| Q9H6D8 | SPPGPRVHFRTLKGSDRLFPSNSSSPGDI TVEGLDGERPLQT |
| Q13520 | VGAALLYGVMPGDIRETLGINVVRNSVSTGQAVAVELLTL    |
| P49615 | TTSLVNVVVKLNATGRDLLQNLLKCNPVQRISAEALQHPY    |
| Q0IIG7 | QRQASPNIIVIALSGNKADLANKRAVDFQEAQSYADDNSLLF  |
| P59542 | NSALYGLEVRIVASNAWAVTNHFSMWLAASLSIFCLLKIAN   |
| Q3T046 | TKKKQIDQFANDIERLDVLFNVAGFVHHGTIILDCEETDWF   |
| Q8CCI5 | RQAKPAADEGEFWDCSVCTFRNSAEAFKCSICDVRKGTSTRK  |
| O08609 | GCREDSHPACAKVEYAYSDNSLDPGLFVESTHKGSVVSRA    |
| A6NGC4 | GIGLVTVGIMSIILGIRILVNDVLQSRPHPPSPGHEKTRGT   |
| Q3T021 | KIFQEEESIRQNREESFNRFNASEPVLSEPLFPEGEIKAK    |
| Q7RTY3 | KVGTQCWVTGWSQVKQRFANSMLTPELQEAQEVFIMDNKRC   |
| P39687 | EGKLEGLTDEFEELEFLSTINVGLTSIANLPKLNKLLKLEL   |
| Q9QYN3 | ATESFPHPDFNNSLPNKDHRNDIMLVKMSSPVFFTRAVQPL   |
| Q9TTJ5 | ECVLRENCHCGESPWEEASNSLLFVDI PAKKVCRWDSLSK   |
| Q9D8T4 | QDSNDDTEDVSLFDAEEETTNRPRKSKIRHPVASFFHLFFR   |
| Q28071 | FRASLYKGADSAVEVCAVNGNHSHPLOSTNKEFNCTVKVGN   |
| Q91VT4 | GRAVAQLMAQKGYRLAIVSRNLEVAKVTAGELGGNHAFRC    |
| Q8R2H9 | AAPGQQLPESLRATYREGYYNEYMQRVFKYLGEQGVRRPDL   |
| O75629 | SGVPYFYLSPQLSVSNLQENPYATLTMTLAQTNFCKKHGF    |
| O88513 | QYWKEVAEQRRKALYEALKENEKHLHKEIEQKDSEIARLRKE  |

|        |                                            |
|--------|--------------------------------------------|
| P04394 | ETTPDKLFTLIEVECLGACVNAPMVQINDNYEDLTPKDIE   |
| P30793 | AKSAQPADGWKGERPRSEEDNELNLPNLAAAYSSILSSLGE  |
| Q922M7 | PVNHKMEHNNNDTQQNHDLNMRKSPSGPVKSPPLSPVGTTP  |
| Q0VCJ2 | PIIENTPEEKDLKERMARAVNDYDSCAVLVRRHGVYVWGE   |
| Q969T7 | RESNAMLRREGYKTFNTLYHNNIPLFIFISAGIGDILEEIR  |
| Q6MZT1 | SSSSPVDSQQHSWQVSTDIENTERDMREMKNLLSKLRETMP  |
| A2A9Q0 | TPGCETLASAGGSLRAHVLRNRSVLLQWRLAPAEARRVRF   |
| 075888 | RQETLFR CIRSMPSHPDRAYNSCYSAGVFHLHQGDILSVII |
| 009061 | GDCLTLTKIIEARLKMVKHSNNKAMTTGAIAMLSTILYSR   |
| Q8BRX9 | AKDGQLLSTVVRTLATQSPFNDRPMCRIHEGSSQEDLLSP   |
| Q9Y3A4 | HGVRQGTKSTWPKRTLFVLNVPYCTEESLSRLLSTCGLV    |
| Q14817 | QQDLKGLHLYGTQGNVGLTNAWSIIQTDFRCCGVSNYTDW   |
| Q66JT5 | MYKPITYNTSLLTEESDNFANKLDPSKVFESKNKILIPKKK  |
| P50540 | LKVLIPLGPDCRHTTLGLLNKAKAHIKKLEEAERKSQHQL   |
| Q9CR67 | SLLQPFIIYRFLTLRYSSRRNPYCRNLFNELRIVVEHIIMK  |
| Q9JMF7 | TLIIFKRELHTISFLGGLALNQGVNWLKHWIQEPRPCGGP   |
| Q6IB77 | NWKQHLQIQSSQPSLNEATQNLAAIKSFVKVQTQRILYMAA  |
| Q0VD50 | QKF IYESDVLWKHQNNIHLVNEWITNDISSTKIRRALRRGQ |
| P79121 | WDQLTLSQRKGLNYRYHLGCNCKIKSCYYLPCFVTSKNECL  |
| Q9EP73 | GQNHTAELIIPELPATHPPQNRTHWVLLGSILLFLIVVSTV  |
| Q8NI29 | HGATGRALLHLARSCQSPARNARPCPLGRFCARRPIGRNLI  |
| Q03401 | YDVGPQPDSSVVGHYTQVVWNSTFQVACGVAECPKNPLRY   |
| P30048 | HFSHLAWINTPRKNGGLGHMNIALLSDLTKQISRDIYGVLE  |
| Q9Y2Y8 | NYRIQCCTSTVNQAQVWIGGNLRGWFLWKRFCWTDGSHWNF  |
| Q924N9 | WKS NKWIQVGVVSKGIDCSNNLPSIFSRVQSSLAWIHQHIQ |
| Q9BZD6 | FFIHRRLLYNRFDLELFTPGNLERECNEELCNYEAREIFV   |
| Q9D3J9 | YWRITSIKEKSSLQMQKPI SNAVLNEYLEQKVVELYKQYIM |
| P09326 | SLLVTSIQGHLVHMTVVS GSNVTLNISESLPENYKQLTWFY |
| Q9TU03 | EALKKETFVLKEGVEYRVKINFKVNKDIVSGLKYVQHTYRT  |
| Q86SE5 | NVTNKNDPKSINSRVFIGNLNTAIVKKVDIEAIFSKYKIV   |
| P05837 | QINPFDPYFFALNQSGSNTNTSDKLTIWNDLSPGTLVVFS   |
| Q60930 | RSNFAVGVRTGDFQLHTNVNNGTEFGGSIYQKVCEDFDTSV  |
| Q8R0A6 | WLQDTKPRKNASSVVPSSVHNSANQRMHSTSSPQAVAKIPK  |
| Q9UKY3 | IQYRLGIWGFSTGDEHSPGNWGHLDQLAALHWVQDNIA SF  |
| P70122 | NVAVVRMKGKGRFEIACYKNKVVGWRSVGEKDLDEVLQTH   |
| P54797 | MDSL SYLKKVSTEGHLYNGFNI IADLSTSKGDVVCYYGNR |
| Q6PHZ8 | IKGLSILLRGTVQEKLWAFNLYDINKDGYITKEEMLDIMK   |
| Q8CI43 | GKILYSQCGLMRALGQNPTNAEVLKVLGNPKNEELKSRV    |
| Q8BNL5 | RDPQGNFYIDRDGPLFRYVNLFLRTSELTLPLDFKEFDLLR  |
| P56857 | RGLTPDDSNFKAVSYHASGQNVAYRPGGFKASTGFGSNTRN  |
| Q2YFS1 | SEFTTAGLEHTRDKRNPSLMNLGAMVTMLLAKVVVVIILVYG |

|        |                                             |
|--------|---------------------------------------------|
| O08337 | HLADGMTVGECAAATMSDNSAANLLLATVGGPAGLTAFL     |
| Q9NRH1 | YGRLRGTLSSALLSWCHLHNNNSTLINKINLLDAVGQCEEY   |
| A8C927 | ADSIISILFPWGTLLLEYVIKPNRDILSNVADLAKKEAHFEFV |
| P13949 | DESVVWQINFPDYPPFALNQSNTNTSDKLTIWNDLSP       |
| P00642 | SNEYPQLSFRYRDSIKKTEINEALKKIDPDLGGTLFVSNS    |
| Q9Y6N3 | MVTEASTHLFHATKQRAYFRNVSILIPMTYKSKSEYLIPKQ   |
| Q96D70 | GLEDDGLAPPASPGIFAEACNNATYVEVWDFMNRSGEEQE    |
| P05631 | IQVRNMATLKDITRRLKSIKNIQKITKSMKMWAAKYARAE    |
| Q9JKB1 | KKFLEESVMSPEERAKFLENYDAIRVTHETSAHEGQTEAP    |
| Q8R2N1 | QFIGTAALIVCVLAIVDPYNNPVPRGLEAFTVGLVVLVIGT   |
| Q8N2C3 | VWKEQTLLCLLQLIHLPLFDNILEPPVKTQNLQLNKEEDLV   |
| P49891 | NAKDVAVSYYYFLLMITSYPNPKSFSEFVEKFMQGVYGS     |
| P16110 | TIMGTVKPNANRIVLDFRRGNDVAFHFNPRFNENRRRIVC    |
| Q9QZ73 | SLDRKKLEQLYTRYKDPQDENKIGIDGIQQFCDDLALDPAS   |
| Q80YF6 | CVFDEHVSTKDTIWLVAVAFSNASRDFQNPQTAAKIPTFPQL  |
| Q8K015 | LSGKLSRGCVCICISTAFEGNLLDSYFVDLVEIKPLRIHHH   |
| Q9H560 | ACAIIILEHGANPNIKDIYSNTALHYAVYNKGTSLAEKLLS   |
| P21796 | RFGIAAKYQIDPDACFSAKVNNSSLIGLGYTQTLKPGIKLT   |
| Q765N9 | ALLTLVPVSWASANTIIRDYFNPLVPEAQKREMGAAALYVGA  |
| P31947 | MDISKKEMPPPTNPIRLGLALNFSVFHYEIANSPEEAISLAK  |
| O43315 | IGLLIIVIASLGLNSGCAMNPARDLSPRLFTALAGWGFV     |
| Q6Q8B3 | RPVDTTHDGYRGIIVVTPDGNFHRGYHLQVLVTPPEVNLFQS  |
| P23184 | LHLENYHSDIVKRIYSKFESNPGVAFIQSYLKEFRIDGV     |
| Q14681 | VSTMSDGWKFEQLISIGSSYNYGNEDQAEFLCVVSRELNNS   |
| P61092 | IVQLIGTRKQAEFAYRLELNGHRRRLTWEATPRSIHEGIA    |
| Q9Y316 | VVCREASHAGSWYTASGPQLNAQLEGWLSQVQSTKRPARAI   |
| Q3SZX2 | DLNDEEEDBEEMSETAAGESMNMEESSQGSATSDQLQNKQS   |
| A6NH52 | AGISLQAANLYGYILCKMGGNSDIGKVTASFLSQTVFQTAC   |
| Q8NC69 | MDTFEEVELSSTRKLSKYSNPVAVIITQLTITTKVHSLLE    |
| P15530 | LLLLFSGEPVPAMTSSDLPLNFQGSQSPSIWQHPRFAAKR    |
| Q8IXQ9 | TLNCELNRLNPFPIIQNILNLEQDKWDLVVLGDMFYDEDL    |
| A6QLM0 | PFREHHIDPTAIRHDFIETNGDNCLLTLPLLNMAKFR       |
| Q86XK3 | GSCSALQNEFVSEKLPKQRLNAEKAKLVKQVQEKEDLLRRL   |
| Q9NYZ1 | CDFWAVKNVTGRMLVGLRWNHIDEDGKSHWVFESRKESSQ    |
| P41732 | HGIPPSCCMNETDCNPQDLHNLTVAAATKVNQKGCYDLVTSF  |
| Q9CZM9 | FSCGPDCKLSQYPCLVYVNLTSSEGERLLLYHTEETMKIN    |
| Q9Z086 | AGASLCIIGGVIFCFISISDNNKTPRMGYTYNGPTSAMSSRT  |
| O95237 | EVARRAEKLLGFTPYSLWNNCEHFVTCRYGTPISPQSDK     |
| P52651 | PMGDGDKDSGTRAGGVEQEQNEPVAEGTESQENGNPGGRQM   |
| O02659 | GTPGIPGIPGPIGQKDPGENMGDYIRLATSERATLQSELN    |
| P15374 | KKFLEESVMSPEERARYLENYDAIRVTHETSAHEGQTEAP    |

|        |                                            |
|--------|--------------------------------------------|
| Q9Z262 | WVNALVSCALPMWKVTAFIGNSIVVAQMVWEGWLMSCVVQS  |
| P0A1V9 | VGWVEWPTGVSFFALNIDTPNRMDDLFKREAIVRAILRSIE  |
| Q1HCM0 | GRKAGSDPVPEPPAAAGFPNGLDQNAELTETYCTEKWHSL   |
| Q6P1X6 | EYFYVDHQGLFLDSSKMKNFITCFKDPQFLVTFFSRLRP    |
| Q17QQ9 | FTRDCFSGKPVPPNLSQHESNCSSYSVESGVYRHLSENNT   |
| Q497H0 | PSTNSQSDLFSEETSDNNNTSVTPTLSPSQQLPTELN      |
| Q99N94 | SVDEIGVRGDLVSVKKSIVGRNKLLSQGLAVYASPENRKLFE |
| Q96A61 | EELFQDQDDELDLWLGDSGITNWDNVVDMWDEEEEEEDQD   |
| Q9D2C7 | GFAPLTVGLGPALELCIAVNPSILPTAFMGTAMIFTCSL    |
| P20645 | EKGKESKELALVKRLKPLFNKSFESTVGGSDTYIYIFRV    |
| P48962 | LSFWRGNLANVIRYFPTQALNFAFKDKYQIFLGGVDRHKQ   |
| Q3UFY0 | VPISKKVARDPRFDDLSGDYNPEVFDKTYQFLNDIRAKEQ   |
| Q8WV35 | AIGQACRQLRVLVDVATCPGINMAAVRRFQAQLPQVSCVQSR |
| P61588 | IDTQRIELSLWDTSGSPYYDNVRPLSYPDSDAVLICFDISR  |
| Q9D0M0 | EGRGGDDLGTETIANTLYRIFNNKSSVDLRSLCISPREHCWV |
| P48299 | CFTYKDKCEVYCHLDIIWINTPEQTVPYGLSNYRESLRGK   |
| P49638 | KIAAVLTDSPFLKVRGIHLINPEVIFHAVFSMIKPFLETEKI |
| Q8TAX0 | EITAGGSVPALKTKPRDFANLALAAATQEDPAKLGRGEGPG  |
| Q80W21 | YEEKRYTMGDAPDYDQSQWLNEKFKLGLDFPNLYLIDGSH   |
| P27144 | TLGQAEALDKICEVDLVISLNIPFETLKDRLSRRWIHPFSG  |
| P63139 | ISFITSEASERCHQEKRTINGEDILFAMSTLGFDSYVEPL   |
| Q6PHN7 | GLMFFYHFSFLQILGLVTEVNLNMLCPAISDPFYGPWYRI   |
| Q9R0U0 | RRSRRSYERRRSRSRSDYNYRRSYSPRNSRPTGRPRRSR    |
| Q5E9V3 | QRRSDKYTFENFQYETKAQINHNIAMQNEKLDGINLESGSQ  |
| P22794 | NTSKSHGEIFKDKVCAENNNMAMLICLIIIAVFLICTFL    |
| P35509 | SSGVLVGPVFRVGGKIGCGNFGELRLGKNLYTNEYVAIKL   |
| P02666 | NVPGEIVESLSSEESITRINKKIEKFQSEEQQTEDELQD    |
| P10746 | GIAMESITVYQTVAHPGIQGNLSYYSQQGVPASITFFSPS   |
| P04393 | KDALLCDTNPHLISFYNALKNKDITGDLVKDFLYREGEKLL  |
| P52623 | RGVDNMVAINLIVQHIQDILNGDLCKRHRGGPNGRNHKRTF  |
| P02253 | VSLAALKKALAAAGYDVEKNNSRIKGLKLSLVSKGTLVQTK  |
| Q64695 | LCNSDGSQSLHMLQISYFQDNHHVVRHQGNASLGKLLHTLE  |
| Q86UF1 | FDYLEASKVIYTNGCIDKLVNWIHSNLFLLGGVALGLAIPQ  |
| Q8IXM7 | RVMDLNPAPNQYQMPLLLGPNTPVSRAPCYSLASRDKNWF   |
| Q3V2Q8 | EHNVTFHSVLHAEKPSRANRNQGRNSEPSSSGSYWNTYTEL  |
| Q6PER3 | KNPPSARNGGHEADAQILELNQQLDLKLTVDGLEKERDFY   |
| Q24K06 | FKALPQVVCTLKQLCILYLGNNKLCDLPRELSLLQNLRTLW  |
| Q3T0C2 | ILVNNAGVNEKNWEKTLQINLVSVISGTYLGLDYMSKQNG   |
| Q9D8C4 | VTFEDPKVVDRLLQKQKHEHRVNLDCRLRVQVQPLELPVVTN |
| P51159 | EEAIALAEKYGIPYFETSAANGTNISQAIEMLLDLIMKRME  |
| Q29461 | IAVSKSVIHEKWSNQLAQGNDIALLLKCLASSVPLTDKIQLG |

|        |                                              |
|--------|----------------------------------------------|
| Q3SYT7 | CIEKAYEKILFTEATRILFFNTPKKMTDYAKKRGWVLGINN    |
| Q3T0Z4 | DSCVPHTDSNNPSITNTTANNRVRVYNLHFNSIENQHRI IHF  |
| Q8R0W6 | ESAA YFDYKDESGFPKPPSYNVATTLP SYDEAERTKTEATI  |
| Q9NRY7 | PGRQHDYLVPPAGTAGIPVQNQPGRPEGVWMPAPPPPLNC     |
| P28293 | GFLVREDFVLTAACHLGSSINVTLGAHNIQMRERTQQLITV    |
| Q9H0U4 | SYANVKQWLQEIDRYASENVNKL LVGNKSDLT TTKKVVDNTT |
| Q2TBH5 | ESQTSFETS NREAAKRRNL P NSVTNISPPAEQPTKKEVLDL |
| P10923 | PQNAVSSSEKDDFKQETLFSNSNESHDMDDDDDDDDGDG      |
| P68250 | VGARRSSWRVISSIEQKTERNEKKQOMKEYREKIEAELQD     |
| Q0VCN1 | ADLGPVLSLLKTP E EYVGRNIGLSTCRHTVEEYAALLTKH   |
| Q9TTJ5 | EQIPDGMCIDVEGKLVVAC YNGGRVIRLDPETGKRLQTVKL   |
| Q61133 | WTKVLGPLIGVQVPQEKVERNRDRMVLVQLQLEDKFLRDRA    |
| Q17QD9 | I LREDAPLEHVERFFQKMDRNQDGVVTTIDEFLETQCKDENI  |
| Q9P0N9 | AMEEMVEDSVDCYWITRRFVNQLNTKYRDSL PQLPKAFEQY   |
| P79103 | PHLVTHDARTIRY PDLIKVNDTIQIDLETGKITDFIKFDT    |
| P11403 | GVPFFTDECKFKEILLPNNYNAYESYAYPGMFALSKNGRT     |
| Q969T7 | ILLGDSIGDLTMADGVPGVQNILKIGFLNDKVEERRERYMD    |
| Q32LB6 | QITEKQFKDKRPGFPFLESENGRKL PWRKILTFEQAVARG    |
| Q9Y3V2 | QAESLLSEPMVHELVLW IQQNLRHILSPETGSGSEKCTFS    |
| Q9BTT0 | LELSDNII SGGLEVLAEKCPNLTYLNLSGNKIKDLSTVEAL   |
| Q15012 | WYMVVNLLMAILLTVEVTHPNSMPAVNIQYEVIGNYSSER     |
| Q96HV5 | SLFFFLFLRLFPMTPNWFLNLSAPILNIPIVQFFFSVLIG     |
| Q16534 | DARRLKENQIAIRASFLEKENSALRQEVADLRKELGKCKNI    |
| Q9CZJ0 | PWFNGWGFNLPRGQSLLDKWNLIPEGIDILMTHGPP LGFRD   |
| P41047 | DTYGTALISGVK YKGGVLINETGLYFVYSKVYFRGQSCNN    |
| Q2PT27 | FIGCQFYDRESQKGCNFSRANLKDAIFKSCDLSMADFRNIN    |
| Q9CQI4 | HKVGSSFQGMTRAGKVVDNFLDLEDVDMEEESK PQMNKD     |
| Q5E9D3 | ELKRRVAEELALEQAKKESENQKRLQSKELDAEKAFANEQ     |
| P00492 | QSTGDIKVI GGDDLSTLTGKNVLIVEDI IDTGKTMQTL LSL |
| Q96S96 | LLDEDTLFCQGLEVFYPELGNIGCKVVPDCNNYRQKITSWM    |
| Q9QXV3 | KSEAITQADKPNKR SRQRNNENRENASNHDHDDITSGT      |
| Q2KI06 | DCIIISDSNSVFIDWVLEATNFHDVFDKVFTNPAAFDSNGH    |
| Q2KI39 | RKKKISQKKQRGRPSSQTRRNIVGCRISHGWKEGDEPITQW    |
| Q13637 | QLFSQHYRATIGVDFALKVLNWD SRTLVRQLWDIAGQERF    |
| P61289 | ANFFPKKLELDSFLKEPILNIHDLTQIHS DMNLPVPDPIL    |
| Q9H019 | PIWQNKPHGAARSVVRIGTNLPLKPCARASFETLPNISDL     |
| P50296 | DGVHGLMGTILAYKKFNYKDNIDLVEFKTLKEEIEEVLKS     |
| Q9H3L0 | GYWADFIDPSSGLAFFGPYTNTL FETDERYRHLGFSVDDL    |
| P50553 | AVSAAFQAGVLSPTTISPNYSNDLNSMAGSPVSSYS SDEGSY  |
| Q1LZ95 | ILVDENRRIGAETKKNCHLNENIERGLHRAFSVFLFNTE      |
| P08246 | ATINANVQVAQLPAQGRRLGNGVQCLAMGWGLGRNRGIAS     |

|        |                                               |
|--------|-----------------------------------------------|
| Q96EC8 | EGEITIPMRSRIREFDSSTLNE SVRNTIMRDLKAVGKKFMH    |
| Q9NPC6 | QQAPLTPPNTPDPRSPPNPDNIAPGYSGLKEIPEKFNNT       |
| P04390 | LYKPSEPNKKIAIDIKTTYTNKENEKIKFTLGGYTSFIRNN     |
| P39942 | VELASLQTSFVTLDEAIKITNRRVNRIEHVIIPRIERTLAY     |
| Q9DAA4 | TLSGLDWSQENNGRHPDLRQNLAPVMTDKDCQKTQQGSSH      |
| Q2NL11 | RDYQGQFNTTHLLALCDYFHNTFIRHYKLYQYVLGQDQDVN     |
| Q3UK78 | KLVPGLREQELQRELEFWKKNKPQENGDDISKVDKSKADE      |
| Q2KI56 | ISQVLEAPGVYVFGELLELANVQELAEGANAAYLQLLNFA      |
| Q3ZBK3 | QDLKEEYARKKETISTANKANEERLKRQLKQSADLYKDRLGL    |
| Q99N09 | GLAVLTAMLWWKQSHSNI PGNVMF LPHSSNND SNMESK VLC |
| P43276 | VSKGTLVQTKGTGASGSFKLNKKAASGEAKPKAKKTGAACA     |
| A0JNC4 | YYFSKFIELLDTIFFILRKKNSQVTF LHV FHH T IMPWTWFF |
| P30932 | SVGLWLRFDSTKSI FEQENNDSSFYTG VYI LIGAGALMML   |
| Q32KU2 | MLSGLDWSQNNNGRHPDLRQNLAPVMSDTACQETE QGKSH     |
| Q96CT7 | REAPDTAEKAKSHLEVPLEENVNRRVLEEGSVEARTIEDAI     |
| Q3ZBY3 | EEFNAI FTFYDKDGSYI DENELDALLDLYEKNKEMNIQ      |
| A5PJN0 | EYTGTMKIFDKNKDGRLDLNDLARI LALQENFLLQFKMDA     |
| Q64105 | AATLGDVSKGFLNVNDLAEVN NYWALNLT SMLCLTSGTLNA   |
| Q920F5 | VLNVAVLRCHPLTI FT FHVINI WLSVEDHSGYDFPWSTHRL  |
| P49427 | PIDYPYSPPAFRFLTKMWHPN IYETGDVCISILHPPVDDPQ    |
| P46782 | VAETPDIKLFGKWTDDVQINDISLQDY IAVKEYAKYLPH      |
| Q80ZQ3 | SITEAVTILGKKLRDYQKQFNVTHLLALCDYSHNTFIRHYR     |
| O88384 | APGGRGDLKYGTYTLENEHLNRLQSQRALLLQGTESLNRAT     |
| P0C1Z6 | KYQALGRRCREIEQVNERVNLRLHQVQRITRRLQQRERFLM     |
| Q8BGI3 | HKFKREWASVMRCIAV FVGINHASAKLDFANNVQLSLTLAA    |
| Q86W74 | VNKDVIRLLESLEEQEVKGFNRGTHSKLETMQTAESESAME     |
| E1BC52 | VESYDDYRWDKSCDYLFPRNNMPEFHKLKT KL VKKKGTRAY   |
| P20181 | RCKEARPVKNGCRGIDDKHWNSQCKTSQTYVRALTSENNKL     |
| Q8NHS0 | DIKKAYRKLALRWHDPKNPDNKEEA EKFKLVSEAYEVLSD     |
| O95484 | WGLTLVSCALPLWKVTAFIGNSIVVAQVWVEGLWMSCVVQS     |
| O08604 | GECLTQPVNDLCQKLRDKVSNTKVDTHKTNGYPHLQVTMIY     |
| Q9DCW4 | KIRVKPDKSGVVTDGVKHSMPFCEI AVEEAVRLKEKKLVK     |
| Q6ZUJ4 | AAPFAAVPCAPENENPAFATNHAPVNAKPHALC PERKPLTS    |
| Q2TBK2 | KFLRSCHLEVGMKNVWELNPEIVARHFLRNLGVV VAPHA      |
| Q01081 | HNKPTFSQTIALLNIYRNPQNSSQSADGLRCAVSDVEMQEH     |
| Q6QLQ4 | GHNSGRNPEEKDNFLSRNKENHKPTESLDEKVAPSKASQT      |
| Q91VU0 | NVVGPKICLEDNVLMSGVKNNVGRGINIALVNGKTGEVIDT     |
| P20826 | SRVSVTKPFMLPPVAASSLRNDSSSNRKAAPEDSGLQW        |
| Q47066 | SKVMAAAV LKQSESDKHL LNQRVEIKKSDLVNYP IAEKH    |
| Q9WVJ5 | QYPGYGYQYLLPEGDFRHWNEWGAFQPMQAVRRLRDRQW       |
| Q96EF9 | HLGRHMEALEIAANLENKATNTDHLTTVLYLQLAICSSLQN     |

|        |                                             |
|--------|---------------------------------------------|
| Q3ZBL4 | GLQAVVHSEVESELINTAYTNVLLLRQLFSQAQEKWYLKLT   |
| B1ANY3 | TEGPWPADAPSWMNKPAVDGNSQSEALSLEMAGLSLPSGGP   |
| A6NLC5 | SPRYCMISDLFIDNYQVKCINGKMCYVQKQPAPHSHRMSPE   |
| Q9NQ26 | EKMAHVEELRLIHADINVMENTIKQSENDLNKLESTRRLH    |
| Q8QZV2 | CALRYCCSSAEARLDQGGCDNDRQQGVGEPGRTDREGPDSS   |
| Q5T0T0 | LFMYVQCKVYVQLWKRLKAYNRVIYVQNCPEPSTKKNIFEKS  |
| P56748 | SFLAFMMAILGMKCTRCTGDNEKVKAHILLTAGIIFIITGM   |
| Q3UF25 | AIVMLIVPFFVNAFMFWVDNFLMRKGTAKLEERGANQD      |
| Q9UL46 | EMETDKQEKKEVHKCGFLPGNEKVLSSLALVKPEVWTLKEK   |
| Q9HBV1 | YALNDRVYIGKRYHYDIRLPNFYQMSTPEIRRSPLTQHFN    |
| P21237 | PLEPPLFLLEEYKNYLDANMSMRVRRHSDPARRGELSVC     |
| P09497 | EKAKKDLEEWNRQSEQVEKNKINNRIADKAFYQQPDADI I   |
| Q8TF63 | GGETPEFPGCHSPAPPENFGNELLPPLSAPLQGLSEGLYPPG  |
| P01881 | FFPENIHLMWLGVHSMKSTNFVTANPTAQPGGTFQTWSVL    |
| Q62225 | QPFVRRSSARSLQHLCLRLVINRLVADVDCLPLPRRMADYLR  |
| Q3ZBL4 | SEVLNGLQAVVHSEVESELINTAYTNVLLLRQLFSQAQEKWY  |
| B2RUY7 | CEPSNEVHCVVADCAVPECVNPVYEPEQCCPVCKNGPNCFA   |
| Q7Z6A9 | LNGTTCVKLEDRQTSWKEEKNISFFILHFEPVLPNDNGSYR   |
| Q15528 | IDLYELEEEYSSSSSLCEANDLPLCEAYGRLLDLDTSADG    |
| Q9Y2W7 | VVGLSILLRGTVHEKLRWAFNLYDINKDGYITKEEMLAIMK   |
| P14207 | HKTKPGPEDKLDQCSPWKNACCTASTSQELHKDTSRLYN     |
| P22090 | SFDVVHVKDANGNSFATRLSNIFVIGNGKWPWISLPRGKI    |
| Q9QZ28 | NPSKKRELAQATGLTPTQVGNWFKNRRQRDRAAAANKRLQQ   |
| Q8K1T1 | TCMVHPSRVDWTQTFNGTCLNFSGLGLSLPRSPLQASHAQV   |
| Q92530 | VGDQPGPNDKSELLPAGWNNKDLVLYVRYEYKDGSRKLLV    |
| Q61096 | AMGWGRLGTQAPTPRVLQELNVTVVTFLCREHNVCTLVPRR   |
| Q2TBP0 | DGIVLGADTRATEGMVVADKNCISKIHFISPNIYCCGAGTAA  |
| P01909 | LRQFRFDQFALTNIAVLKHNLSLIKRSNSTAATNEVPEV     |
| Q3SZ27 | VKNGIMDTVQFGKDAYVYLKNPPRDFLPKIGVITVSGLAGF   |
| Q9D504 | ACANGYTNIVSLLIENQCKINVQDSENRTPLIKAVECQQES   |
| P37980 | HDYWRALVTKKTDGKGISCMNTTVSESPFQCDPDAAKAIVD   |
| Q9JJE4 | AFLTGPRLDWASSPPHLQFNKFVLTGYPASSGSGCLRSL     |
| Q8NEG0 | VYILRPPVEAYS DTRAILAGNTLDSSVLEEVQRSVPVGYAMK |
| Q1LZ95 | DAKITFPGCFTNTCCSHPLSNPSELEENDAIGVRRAAQRRL   |
| Q9DCY0 | QTAKKLAPSLMDAKNLVVS RNKLTPLDQQLFKFASLDVTHA  |
| Q9CXE2 | KEHPGAEDASEEQNSQSSMENS VNSSEKAERQPSAESGLAA  |
| Q3TC33 | LLEQERAQIKQEKSRQLPLRNVYLSCLQEEDDWQRRQHV L   |
| Q91VK4 | ISLDCYVIELNTTIVLPPRNFWELLMNVKRGTYLPQTYII    |
| Q8TBE9 | AEIICDKVQVKSKECFHPYNTCITDLRTSHWEEAIQETKG    |
| Q86UP9 | RNSRAIGVLWAI FTICFAIVNVCFIQPYWIGDGVDTQPAG   |
| P12980 | STLGTAPPTLALHYHPHFLNSVYIGPAGPFSIFPSSRLKR    |

|        |                                             |
|--------|---------------------------------------------|
| Q05066 | SSSFLCTESCNSKYQCETGENSKGNVQDRVKRPMNAFIVWS   |
| Q6P9H5 | RELMEKVEAIMWENEGDYYSNKAYQYTQQNFRLKELQERQV   |
| Q3T0V3 | YLGDLLETCHFQAFWQALDENMDLLEGITGFEDSVRKFICH   |
| Q8WWZ3 | KENCTCSSCLLRAPTISDLLNDQDLLDVIKLDPCHPYTK     |
| Q9WTJ2 | HMKCHNDVKRHLCTYCGKGFNDTFDLKRHRVTHTGVRPYKC   |
| Q6ZUI0 | KFLEICKLSGFMSKLVPAIQNAHKNSTGSGRKKMLVLETP    |
| P01911 | RWFLNGQEEKAGMVSTGLIQNGDWFQTLVMLETVPRSSEV    |
| O60671 | LSTILKAIHFREHATCFATKNGIKVTVENAKCVQANAFIQA   |
| O75631 | RFGSAVNLPQLASVTFATNPTLTTVALEKPLCMFDSKEA     |
| A6QQ85 | QFSHPSISDSDAIWLVAHSNATQKFTAPQKVEDTFVPADF    |
| Q14353 | YDTYPLSEETWHTHQFNFIKNHAFRLKPGGVLYTCNLTSW    |
| P51153 | DITDEKSFENIQNWMSIKENASAGVERLLGNKCDMEAKR     |
| Q8HZJ5 | LLALGDSGVGKTTFLYRYTDNKFNPKFTTGVGIDFREKRVA   |
| P43528 | GGLIPRGQDEAYERGTPININLYDHARGTATGNTRYNDGYV   |
| P79099 | VLAEFLATLLFVFFGLGSALNWPQALPSVLQIAMAFGLAIG   |
| Q8VD53 | LFFILPPICMCLFRQYATCFNSGIYLIWTLVGVVIGSVYF    |
| Q96CN7 | VSERCKVRLVPLQIQLTTLGNLTPSSTVFFCCDMQERFRPA   |
| Q91WB4 | FFLFNDILVYGNIVIQKKKYNKQHIIPLENVTIDSIDKDEGE  |
| Q96AT9 | IEVDGGVGPDTVHKCAEAGANMIVSGSAIMRSEDPRSVINL   |
| Q6I9Y2 | EVIRKRLIDGDGAGDRRINLLVKSFIKWCNSGSQEEGYS     |
| O88346 | KRQTGREMKLRILSERKKPLNIDYMGEDQLREKAQELSEWI   |
| Q9CQV8 | THPIRLGLALNFSVFYYEILNSPEKACSLAKTAFDEAIAEL   |
| Q8VC04 | FSLTIFFLYPRPIAVRPVGLNSSTVTFEDAHVQLNNTTNVLN  |
| O89116 | LEQMDLEVREIPPQSRGMYSNRMRSYKQEMGKLETDFKRSR   |
| O08899 | SRNMLQPTITCFDEAQKKIFNLMERDSYRRFLKSRFYDLT    |
| O54917 | PSLLVDPAQETVRRRCRDPINVENLLPSKIRINLEENVQYV   |
| P17482 | LETSAGREAVLSNQRPGYGDNKICEGSEDKERPDTNPSAN    |
| Q29RZ1 | AAFNLQVATPGGKTMDFVDVNESNARWQDFRLKAYASPAK    |
| Q8N983 | ASSRGAREFVEREVIDFARRNPGVVIYVNSRPCCVPRVVAE   |
| P58774 | EKLEQAEKKATDAEADVASLNRRIQLVEEELDRAQERLATA   |
| Q13007 | VPQKLWEAFWAVKDTMQAQDNITSARLLQQEVLQNVSDAES   |
| P70377 | KSNACKCVSSPSKGKTSCKNKNLVFSRVKLFSGSKRRRRR    |
| Q8R0J7 | LQVLFQAYQIKKTKLDKQSNNASLETLLALLQAEQAKIEED   |
| P07146 | PAGTQCLISGWGNTLSNGVNNPDLLQCVDAPVLPQADCEAS   |
| Q9QZ23 | LQGSCTSCPSSIITLKSQIQNMLQFYIPEVEGVEQVMDDDE   |
| Q8BW74 | SVMDLSSRATAPLHPGIPSPNCMQSPIRPGQLLPANRNTPS   |
| Q9D720 | YALVNLATTSVSKMATDFAENELDLFRKALELIVDSETGFA   |
| Q00262 | NRIRGKLKLSIEQSCDQDENGNRTSVDLRIIRRTQHSVLSRKF |
| Q9DAZ2 | LVRTPETLLTLVHSLNLSWTNALNHLVNMSTMQGDTSLSLI   |
| Q5BKY1 | SLPPELGQLQNLQILALDFNFKALPQVCTLKQLCILYLG     |
| P15428 | ILVNNAGVNEKNWEKTLQINLVSVISGTYLGLDYMSKQNG    |



|        |                                            |
|--------|--------------------------------------------|
| P09428 | KVYPKRNMEKRFVFKTEIKNTVEFESVLYPNWYISTSQIE   |
| P62906 | AVGHVKMTDDELVYNIHLAVNFLVSLKKNWQNVRALYIKS   |
| Q8WV22 | HLPCVAKYFQSNAEPRCPHCNDYWPHEIPKVFDPKEKERESG |
| Q3UUI3 | TIIDVTTGTCAISEGVAMTANLNITYKKPIPLLSVVVVNSQ  |
| Q9H1Y0 | DHKQLWMGLQNDRFQFWAINRKLMEYPAAENGFRYIPFRI   |
| Q8WVF5 | PEEFSISSNIIQFKYFIKSENGTRLVLKEDNTFVCTLETLK  |
| Q8WUK0 | DENVRGVITMNEEYETRFLCNSSQEWKRLGVEQLRLSTVDM  |
| P20040 | FSDVGEFRAVTELGPRDAENWNSQPEILEQKRAAVDTYCR   |
| P40293 | LQCTHNGSNTNVTWWHVLQSNSSWPPVMYRGDVGAGGELII  |
| Q925N4 | ADDSLEVSTKCRGLWWEVCTNAFDGIRTCDEYDSIYAEHPL  |
| P09611 | NLLLCQGVEDYAPYCKNQPGNCRIPLQSLFERATLVASNNY  |
| Q9Z2Y8 | LSSCPEIKWHFIGHLQKQNVNKLMAVPNLSMLETVDVSKLA  |
| Q9ESG4 | LLCNITQRVSWFVVTDPSSNNYTLPAAEVQS AIRKNRNRIN |
| O14618 | IDGLEPGLHGLHVHQYGLDNTNCSNCSGNHFNPDGASHGGPQ |
| Q8IYS5 | PGPVVGPANVSLRCAGRLRNMSFVLYREGVAAPLQYRHS    |
| P00405 | LHSWAVPSLGLKTDAPGRLNQATVTSNRPLGYQCSEIC     |
| Q9UBK7 | FNFAKKFSLPLYFVSAADGTNVVLFNDAIRLAVSYKQNSQ   |
| Q3MHK4 | VVGFVTSFVGWIGIIVTTSTNDWVTCGYTIPTCRKLDDELG  |
| Q00688 | DSFLAEHKLGNIKNVAKTANKDHLVTAYNHLFETKRFKGT   |
| Q64267 | LLKDCDLEKREPALRFLVKKNPRHSQWGMKLYLKLQVVKR   |
| P36980 | EEGWSPTPKCLRLCFFPFVENGHSESSGQTHLEGDTVQIIC  |
| Q8CDW1 | VQPLQQRITDKITSYRRPGKNQVQYEHCLKQTNKPTKVSSS  |
| Q16890 | SFEERVETTVTSLKTKVGGTNPNGGSFEEVLSSTAHASQAQS |
| Q8BFZ6 | KQDQIIGADTKKNCHLMENINKGLLHRAFVVLVFNMKNELL  |
| Q8VC04 | IGPLASEQMPYEVASRILDENTYKICTWPKIRVHHILLNIQ  |
| Q8VCE6 | DITGAEPHPSWEHILFTSCHNYHLQLQPPRRRLHSWADDWK  |
| Q8VCG9 | RETTSQVAKQRKPMCKKHRNKMYKDKYKKKSDQALGSGG    |
| P06340 | INVPPRVTVLPKSRVELGQPNILICIVDNI FPPVINITWLR |
| A9UHW6 | FICNIFDYLRVNNMPPMALVNPVYDCLFRLAQPDSLSKEEE  |
| Q8N9E0 | LENKKTGSKALAEFEEKMNENWKELEKSREKLLSGNESSS   |
| P08865 | ADHQPLTEASYVNLPTIALCNTDSPLRYVDIAIPCNNKGAH  |
| P23463 | TERQVKIWFQNRMRKWKKENNKDKFPASRPEAKDGPKEV    |
| P23709 | YKAANWYEREIWD MFVGFANHPDLRRIITDYGFEGHPFRK  |
| E1BE10 | KVLITGSLNWTQAIQNNRENVLIVEDEEYVRLFLEEFERI   |
| Q01081 | KYGEVEEMNVCNLDHVLGNVYVKFRREDAEKAVIDLNN     |
| Q0II86 | RTEKMVDKMEQDLKTSQKHINSIKSVFGLVNYFRSKPAET   |
| P52744 | HTRENFYKCECGKTFNWSSTNLSKPKKIHTGEKPYKCEVCG  |
| P41732 | GVWGKLTTLGTYISLIAENSTNAPYVLIGTGTIVVFGFLGFC |
| A2AQ14 | HLAWDLRSRSLGALAFSKVTNNVVLEPFLVIGIEGFLKSSTY |
| P01912 | SDVGEFRAVTELGPRDAEYWNSQKDLLEQKRGRVDNYCRHN  |
| Q9NPB1 | DITGAEPTPSWEHVLFTACHNQLQLQPPRRRLHSWADDWK   |

|        |                                             |
|--------|---------------------------------------------|
| Q9UNK0 | DLANLVENTDEKLRNETRRVNMVDRKSASCGMIMVILLLLV   |
| Q8C436 | TLGADVIVTDLEELQDLLKMNIDMNKHLVGTGSVQAKVLKWG  |
| Q9CWH6 | VEYAQEAVKKGSTAVGIRGTNIVVLGVEKKSVAKLQDERTV   |
| Q2KI69 | PQGDSTTYAHFLFNAFDTHNGAVSFEDFIKGLSILLRGTV    |
| Q8IX29 | NLAELDQLWMLKCLRFNWYINFSPFPFEGQGIWKKHYYIQMVK |
| P33681 | LSVKADFPTPSISDFEIPTSNIRRIICSTSGGFPEPHLSWL   |
| Q1RMX6 | PEDVLTLSQQGQKHRALQANKASALTTNTTQGRSKTKSQM    |
| Q5E9B7 | AGLDIFAKFSAYIKNSNPALNDNLEKGLLAKLVLDNYLTS    |
| Q9D701 | QNFTAPRKVEDRHAPANFDRNGYYLTLRANRVHYKGGQFDS   |
| Q2HJ38 | VKYAEQERRFEPEKLREGRNIIGLQMGTKNFASQQGMTAY    |
| Q3ZC52 | LEKVAQKMQAPHKIHWEKANHSMAVKGRSTNDVFKEINTQ    |
| Q58CX6 | QKLLKFLNKHYNLETTVPQVNNFVIFEGFFAHQHPPARKLP   |
| P30084 | RGPLRPPVRCPAWRPFASGANFEYIIAEKRKNNVTGLIQI    |
| O35526 | LEITGRTTSEELEDMLESGNPAIFASGIIMDSSISKQALS    |
| Q2TBH5 | LDSESQTSFETSNREAAKRRNLPSVNTNISPPAEQPTKKEV   |
| O88668 | FDPQSPLCVHIMMSGVTVKVNKTEEDYARDSLFVRHPEMKH   |
| Q78PG9 | GQIGFHRQKDVKIVTVEKKVNEILNRLEKTKLEKFPDLAAE   |
| P59542 | VVSRIGLLWVMLFLWYATVFNSALYGLEVRIVASNAWAVTN   |
| Q9CR10 | DCCQSLHRHRAPVQVTDSSRRNLGMDHREEGFQVGTEDDREP  |
| Q9D198 | EQRLRKFRELHLKRNEARKLNHQEVVEEDKRLKLPANWEAK   |
| Q9BU76 | ATSSPTSPERPRHHHSDSDNSPCCRKRKRGHSGDRRSFSR    |
| Q16772 | QQVPMVEIDGMKLVQTRAILNYIASKYNLYGKDIKERALID   |
| Q60809 | QLLRCNVDLLKIIQLGLTFMNEQGEYPPGTSTWQFNKFNL    |
| P62261 | AGMDVELTVEERNLLSVAYKNVIGARRASWRIISSIEQKEE   |
| Q5TAG4 | KRRRGRKEGEEDQNPPCPRLNSVLMEVEEPEVLQDSLDRCY   |
| Q9D3J9 | DVIRETYLVPPSCKSICKNYNDLHIAGQVMAINSVMANFP    |
| Q9P013 | KEQEQAEEERIRMENILSGNPLNLTGFSQPQANFKVKRR     |
| Q3T014 | SYNVTPPIEESHPIYHEIYNDRKYKVDVPLDQLPRSESL     |
| P31268 | YTAGASLFQNAEPTSCSFAPNSQRSGYGAGAGAFASVPGI    |
| P0C8J7 | DIQQTIKLGICKINVATELKNAFSQAALNYLTAHPEATDPR   |
| P14415 | THGYSTGQPCVFIKMRVINFYAGANQSMNVTCAGKRDED     |
| O35943 | LNKKQSVCVVHLRNLGTLDPSSLDEYERLAEETLDSL       |
| Q8TDN7 | HVLISITFPYGMVTMALVDANYEMPGETLKVRYWPRDSWPV   |
| Q9QXS8 | KDYVAQCLQTDMAITRSYLNAGSFWVAESGGLVVGTVGG     |
| Q9ERB0 | LRRLQDAELDSVPKEPSTVNTEVYPKNSTLRTHQKIDSN     |
| Q6X4U4 | ILYSHVVKPVAHPSNSSTLNQARNGRHSNTGLDRNTRV      |
| Q9JJR5 | RRKPEMHMYSDTGHSQEQRNCRGETSVGQESIYQTSEHSQ    |
| Q80YT9 | SEPANQSFESCAKINSHSFRNDEMAGRSPFPVFPFITSA     |
| Q16653 | GLIFLCLQYRLRGKLRABEINLHRTFDPHFLRVPCWKITLF   |
| O95475 | NPSKKRELAQATGLTPTQVGNWFKNRRQRDRAAAANKRLQQ   |
| Q3T0G5 | SHGQRTFGENYVQELLEKASNPQILSSCPEIKWHFIGHLQK   |

|        |                                             |
|--------|---------------------------------------------|
| Q9QWZ1 | ITTQEPEETLDFDFCSTNVMNKIILQSEGLREAFSELDMTG   |
| Q13637 | IEEAARFLVEKILVNHQSFNPNEENDVDKIKLDQETLRAENK  |
| Q8R191 | PIVNEGYVNSDSGPELRCVFNAGACRFGVVLGLGAFIAC     |
| Q9QWZ1 | DVLQITVSPDKYFRLSTFGNAGNSHLDYPKDSDLVEAFHC    |
| Q28110 | KPISAGLTDAAENDAARTEAENTVTYSLLSHPDVAEEDSESD  |
| Q9D1C9 | AASLRVLEKEKRKRARKELLNFYAWQHRETKMEHLAQLRKK   |
| P35270 | YCAGKAARDMLFQVLALAEENVRVNLNYAPGPLDMDQQLAR   |
| Q3URF8 | FTVREAPQIYLSLSSSMEVFNANIFSTSCFLKLLGSKLLY    |
| Q29461 | AANRQWQVHGIVSFGSSLGCNYRKPVSFTRVSNYNDWISS    |
| Q0IIG7 | EESFARAKNWVKELQRQASPNIVIALSGNKADLANKRAVDF   |
| O95452 | SIFFRIFEEAAFMYVFYFLYNGYHLPWVLKCGIDPCPNLVD   |
| Q8BJN4 | WLCRCHEPRWSYRAGQMEEANGLVRWPEETPALGQREEDLQ   |
| Q9QWV4 | ERMAVGHHIHDRGHVIRKSKNNKTGDEEVNQEFINMNESDA   |
| Q9BZJ3 | ASETFFPPGMPCWVTGWGDVDNNVHLPYPPYPLKEVEVPVVEN |
| Q9EQU5 | GLPKGEKEQQEATEHIDEVQNEIDRLNEQASEEILKVEQKY   |
| Q7M759 | SGMRVAFPDTKKTYCFDAFPNIDKISKITSPVLIHGTED     |
| Q9BX73 | AALLLGNLLLLHCVSRSHSQNATAEPELTSAGAAQPEGPGG   |
| O75954 | LKEGLLLYHTENNVLKNAWNIQAEMRCCGVTDYTDWYVP     |
| P41236 | DLHDDDEDEEMLETDAGESMNTESNQGSTPSDQQQNKLR     |
| Q3TZ65 | TLENGSGPLYVLPSTVGYVNHDCCKAASPAYSLARRPSEA    |
| Q9H426 | GICIAKKTKVARKSLDPLYNQVLLFPESPQKVLQVIVWG     |
| O70338 | YTDSMFTINGITNWWQGWKKNGWRTSTGKDVINKEDFMELD   |
| O70273 | EGIFRFLKSEAVAQLWGKKNSSMTEKLSRAMRYYYKRE      |
| Q2HJE0 | CREKVGEKLCEKIIINIVEVMNRHEYLPKMPTQSEVDNVFDT  |
| Q3SZ19 | SPASIAGLQVDDEILEFGSVNTQNFQSLQNGISVVQHSEGK   |
| P20490 | AAGTGIAMLI LNLTNNFAYMNNCKNVTEDDGCFVASFTTEL  |
| Q96BQ1 | AKDLRGKSPFEQFLKNSPDTNKYEGWPELLEMEGCMPPKPF   |
| Q3SYR2 | RNQLLKSFDHFGFCIPSSKNTCEHIYDFPALSEELINEMI    |
| POCI32 | FFPQPADFTGPYVMLTSRRNRNALSVMINADAGLAIRGIR    |
| Q9DA16 | NAFVGKVVVDQLEKVATSFKNQAQYIKANSKTDVPLLEELV   |
| Q16890 | LSAKERHLVEIKQLGMNLMNELKQNFKSWHDMQTTTAYK     |
| Q6NS38 | PSRRVAVVRLPLAHGSLMMNHPTNTHWYHSLPVRKVLAP     |
| Q8BQN6 | QSSSLTVHVRSHTEGKPYGCNECGKAFSQFSTLALHLRIHT   |
| Q8WXK3 | AKCFEYYEKTPLTSLQLCRVNLRKATGVRGLEKIAKLNIPP   |
| Q3T028 | PKYFSNELLLKESHQHKPTENFFLPLMPQKKNLRSGLKPVF   |
| P70396 | MKNGEMPPEHSPSSSDPMACNSPQSPAVWEPQGSRSLSHH    |
| P54368 | PPLKIPGGRGNSQRDHNSANLFYSDDLNVTEELTSNDKT     |
| P28907 | WKTVSRRFAEAACDVVHVMLNGSRKIFDKNSTFGSVEVHN    |
| Q3SZ21 | FADLDRAGSDLKALRGLIVENAAHLGYSVVAINHVVVEFKEK  |
| Q6PFG8 | EMYLDRHHRRHHHHHQQESRLNSVSSTQGDVMQKMPGESLSR  |
| Q921H9 | GKARDYYSRACDGGYAASCFNLSAMFLQAGPFPKDMGLAC    |

|        |                                            |
|--------|--------------------------------------------|
| Q80UW8 | LVDMAKPYVLEQFLQOELLINITEHELVEHVMTKEEVTE    |
| Q9BZM6 | QWCEVQGLVDERPFLHYDCVNHKAKAFASLGKKVNVTKTWE  |
| Q9BY19 | YPNSQPQVHLVPGNPPSLVSNVNGQPVQKALKEGKTLGAIQ  |
| Q46471 | GSRHRIFEEFICSEAPKEVNIHETRELTRTNLQAATAVC    |
| Q0VCS6 | FYQLSNTQQDSILQKEEKLGNLSRQLQSLRTQNRKLAETLH  |
| Q8R2M0 | VIDIKRWKTMLELPDQTKENLVAALQELKKKMPREVLRS    |
| Q9EQC7 | DQTGSAHCVVCRAPCPVPSNPGQELCGNNNVTYISSCHLR   |
| Q92813 | ERFSLPPQCRVVADRMDNANIAYGVAFERVCIVQRQKIAY   |
| Q16635 | RLIAECHLNPIILPLWHVGMNDVLPNSPPYFRFRGQKITVL  |
| Q35740 | GPGTVNGGHPPSALAPAARFNNSQFMGPPVASQGGSLPASM  |
| P05142 | LFTVALLALSSAQGPREENQNIQIPNQRPPPSGFQPRPVV   |
| A0JLT2 | MRELPGSTELTGSTNLITHYNLEQAYNKFCGKKVKEKLSNF  |
| Q9DAX2 | WSQVNCSGYVQLEVCRCGSPANVTEARLSFYSGHSSFGMYCM |
| Q3UMZ3 | TELLPPFQRRIQPEELWLYRNPYVEAEYFPTGRMFVIAFLT  |
| Q5T700 | AHCGDPASWIYSDQKCDGTNNCGDCSDELSPVTVCPGCGG   |
| Q0VD27 | EGTTTPIAFVKDILFPYVKENVEEYLQAHWEEEECCQDVRL  |
| Q2KI39 | KLKILPDKVPFSRVRDVHLANTIIGKAVEHMFEGEHGSKDG  |
| Q8BHH2 | RYVTNKFDSQAFHTIGVEFLNRDLEVDGRFVTLQIWDTAGQ  |
| Q6UX52 | KNIKVAKKVVKTHEPASFNLVTLKSSPDLLTYFCWASSTS   |
| Q9JIM5 | QSNYIIDNQEPSCNDSNAYGNVYGYREPQATEQPSSPAPPE  |
| B1AQL3 | SYSHLAFVEAARTYGVTHVQNVHISFGWSLALAWASCASEV  |
| Q8TAG5 | DMKPRKNVSAATPSSIHGSANQRTHSTSSPQVAKIPKQSP   |
| Q9JM71 | LTAACHYGNDTSQHNVLGKNKLFQREPSAQHRWVSKSFPH   |
| Q8IY95 | AFLTGVLCSPNPNEKCPGNYTNPLKVQTVIILGKVIWI     |
| P04481 | KPGTPELSLERPLFDTEVYVNGEKKYVLPDFIVTARAPDGK  |
| Q0IIL5 | NALLVQLPELPSKNLFFNMNRQHVDQRRQGLEDFLRKVLQ   |
| Q9JHH2 | VVVIHFGDHFTVIGHASLERNPYETLRYWAFYVVGISLAGLL |
| Q2YFS1 | KGRLILNWTQGQTSGLRILNFKESDQTWYFCRVFLQTTEG   |
| Q75VT8 | SSHEDPIYISCTAPGDILGANFTLFRGGEVVQLLQAPSDRP  |
| A6NNA5 | SCCVDPDPMGLSFLPTYGCQSNRTASVATLRMKAREHSEAVL |
| Q9HAV5 | LDLQKFSSSASYTGAETLGGNTVESTGDRLELNVFPEVSP   |
| Q8C1T8 | QSSCVASNSHLALFHSLEELNFKRYKGTSDHWIGLHRAST   |
| Q9D7N2 | ASYRPSYVSSSCRVPSPFMNCRPVSCVSGGYRPLPCGSN    |
| Q2TBP0 | KKLVSEAIAGIFNDLGSGSNIDLVCVSKSKLDFLRPYSVP   |
| Q3T0C2 | ASKHGIVGFTRSAAMAANLMNSGVRNALICPGFVDTPI LKS |
| P00915 | QKVLDAQAIKTKGRAPFTNFDPTLLPSSLDFTWYPGSL     |
| O02691 | KTYNLKKSQAHTLEDFQRVINVNLIQTFNVIRLVAGEMQN   |
| Q96BQ1 | RMIMSPVKNNVGRGLNIALVNGTTGAVLGQKAFDMYSGDVM  |
| O08600 | ATNADYRSGGFDGRGLAAAANHRWSQRAMDFTFYLSNVAPQ  |
| A4D1S5 | TLAEKYGLLAVLETSKESKNEEVFVLMAKELIARNSLHL    |
| Q3TBL6 | LNQTAMTMVSFYEVEYTFDTNVLSKLLHECKDLVHELQRH   |

|        |                                             |
|--------|---------------------------------------------|
| P20774 | CKANDTSYIRDRIEIEIRLEGNPVILGKHPNSFICLKRPLIG  |
| O75631 | VNMSTGLVEDQTLWSDPIRTNQLTPYSTIDTWPGRSSGMI    |
| P06717 | GQSILSGYSTYYIYVIATAPNMFVNDVLGVSPHPYEQEV     |
| P14438 | VFPKSPVLLGQPNLTLCFVDNIFPPVINITWLRNSKSVADG   |
| Q62082 | SMFDQSQIQEFKEAFTIMDQNRDGFIDKEDLRDTFAALGRI   |
| Q5E9E3 | TGRFRCSVPGYYYFTFQVVSNDICLSIRSSRRDQIQPLGF    |
| Q9D8C8 | QLRKSFRTRCALEETVAEGLNVPRSKRLYRDLVSLQVPEEQ   |
| Q9CY28 | IDKSSKGYLLKQVLQIQKQFVNTQTQGCFFQLPFISAVTNSG  |
| P08034 | ESVWGDEKSSPICNTLQPGCNSVCYDQFFPISHVRLWSLQL   |
| O08989 | FVPDYDPTIEDSYLKHTEIDNQWAILDVLDTAGQEEFSAMR   |
| Q9NYW5 | LFYFSAIIASVILNFVGIIMNLFITVVNCKTWVKSHRISSS   |
| Q8BW74 | GIPSPNCMQSPIRPGQLLPANRNTPSPIDPDTIQVPVGYEP   |
| Q5HZI9 | ALRCHGIAEYRGMVPIIFRNGFGNVLFGLRGPIKESLPT     |
| P10746 | FFSPSGLTYSLKHIQELSGDNIDQIKFAAIGPTTARALAAQ   |
| O94778 | LVAEIIILTLLALAVCMGAINKTKGKLAPFSIGFAVTVDI    |
| Q92688 | NRIFGGLDMLAEKLPNLTHLNLSGNKLDISTLEPLKKEC     |
| Q2KIP7 | EQLLRAFILKISVCDAVLDHNPFGCTFTVLVHTREAAATRM   |
| A6NLU0 | KDLEEAVQLKCGYACCLQCLNSLQKEPDGEGLLCRFCSSVS   |
| Q8CD60 | APRPGTGPDYQLMNGGLPIPNGPRVETPSSSEEAFSAGPA    |
| Q8N0W7 | SYLCSGSSYFVLANGHILPNSENAHGQLEEDSALEALLN     |
| Q8VHW4 | DAWIRGRSPSDISSDASLQMNSNYPALLKCPDYDQMSSSPC   |
| Q9UBU2 | RAKLNSIKSSLGGETPGQAANRSAGMYQGLAFGGSKGKGNL   |
| P19803 | PTAEQLAQIAAENEDEHSVNYKPPAQKSIQEIQLDKDDE     |
| Q5KR48 | KLEEAEEKADESERGMKVIENRAMKDEEKMELQEMQLKEAK   |
| P43307 | FVKGEDFPANNIVKFLVGFNTKGTEDFIVESLDASFRYPQD   |
| Q00286 | LVEEPIIDMDSPEIRELEQFANEFKVRRIKLYTQTNVGEAL   |
| Q99PT1 | PTAEQLAQIAAENEDEHSVNYKPPAQKSIQEIQLDKDDE     |
| Q8VE95 | NHSGRYEASFPLSLCGRERNFLRCEDPVVFTLLASDSE      |
| Q8BH58 | MMFGDNVLRIQHGSGFIEFNATDALRCVNNYQGMKLVACA    |
| Q8C552 | DQPKILSKNEPIPPSALVKPNANDAQVLMWRPKYGQPLVVI   |
| Q6PB51 | GAVTDEWALGAHQGREGHGVNTCPSSLSMPSMLDVVCEEMD   |
| Q9BXJ2 | AIGLVHNGQYRIKTFDANTGNHHDVAGSSTVIYLLQPEDEVWL |
| Q00688 | RFKGTESISKVSEQVKNVKNLNEKPKETKSEETLDEGPPKY   |
| Q08DY6 | DLNKVATKLGVRKRRVYDITNVLDGIDLVEKKSKNHIRWIG   |
| Q8MJI9 | GYPAAETVTSSVDMNTQPYRNLSGVRVGRPKLSLQGVQRGR   |
| P04769 | KDLEYYIIRIISKVNPAIKENEDYPTWSDLDSLKSADKETQ   |
| Q99618 | PPSPLVKQLSEVFETEDSKSNLPEPVLPEAPLSSELPLP     |
| Q03402 | KCTFSHSPIELRTTNLKCENLFMSSYLVPWSSVIQGWYNE    |
| O54957 | ENQEPACKNVDAADEDEDDYPNGYLVVLPDSSFAAVPVVSSA  |
| O95229 | AFEQLQAKKQMAEKRRRAVQNQWQLQEQEKHLQHLAEVSAEV  |
| Q0V7M7 | IKRTLRLRNCGQEPTLKTILNKIGDEIIVVNELLNKLELEI   |

|        |                                              |
|--------|----------------------------------------------|
| Q9N0T5 | LCLIGESFDDYSDDVCGAVVNVRAKGDKIAIWTTECENREA    |
| A6NDU8 | MYSGEMCYWGSKYCADQQPENHEVDTSVSGAGCTTYKEPLD    |
| Q8K354 | DDPQSI RALRDFLRKEYGGLNVLVNNAGIAFRMDDPTPFDI   |
| Q46669 | TAHAIAMRNDAPALVEEVYNFFRDSRDPVHQALNMMI LGD    |
| P09017 | QIKIWFQNRMRKWKKDHRLPNTKVRSAPPAGAAPSTLSAAT    |
| O09061 | DCLTLTKI IEARLKMVKHSNNKAMTGAIAAMLSTILYSRR    |
| P28230 | SRKGSFGHRLSPEYKQNEINKLLSEQDGLKDI LRRSPGT     |
| Q8N456 | NGLPVELKQLKNIRAVNLGLNHLDVPTTLGALKELHEVGL     |
| Q9NWG9 | LKVMHFVARVRNRCSDWPCNYDWDSDDAEVEAILNSGAR      |
| Q3UGR5 | QDPNAVVI GLAPEHFHYQLLNQAFRLLDGAPLIAIHKARY    |
| Q60932 | GWLAGYQMFETSKSRVTQSNFAVGYKTDEFQLHTNVNDGT     |
| P97328 | QVTWQSQGDTPCSCCIVNNSNGSRTI ILYDTNLPDVS AKDF  |
| P38573 | QMLERYQNNSPNNDDQWKNGVTKTWDRMLQDNCCGVNG       |
| P53805 | EMKLYFAQTLHIGSSHLAPPNPDKQFLISPPASPPVWGKQV    |
| Q7Z3S9 | EGFLGEYCQHRDPCEKNRCQNGGTCVAQAMLGKATCRCASG    |
| P86176 | QAAFLATAIGATAGTIDTKRNISAEEGGSVILQCHFSSDTA    |
| Q8BVA2 | ICTSAGVIRDFAGPYFVSEDNMAFGKPAKFWKLDPGQVYAS    |
| Q58DT1 | NKASINMLRIVEPYIAWGYPNLKSVNELIYKRGYKINKKR     |
| Q9BU20 | VPNWHESAEGKEYLACILRKNRRRVFGLLERPVLLPPV SID   |
| O75954 | ATTPLRWRTGCYEKVKMWFDDNKHVLGTVMCILIMQILGMA    |
| O15266 | DGQTKLKQRRSRTNFTLEQLNELERLFDETHYPDAFMREEL    |
| Q9DBU2 | LCGDWFPIEYPDSWYRDI TSNKKFFSLAATYRGAIVGMIVA   |
| Q8N9N7 | SKNQIRSI PDSVGELQVIELNLNQNISQISVKISCCPRLK    |
| O35718 | YYIYSGGEKIPLVLSRPLSSNVATLQHLCRKTVNGHLD SYE   |
| Q8R2N0 | TEQTSSEEPPGGHQPPPELNTGSSVTFPKNKKKTSNQKA      |
| Q15800 | NPLNLI PFYAGSRHHDFFHMNFIGNYASTFTWWDRI FGTD S |
| Q9D676 | KHPMWTDNTEYNNMFVYHMNAQCLKKPEEGESSPGTGGVH     |
| Q9D9S3 | VNALTNIKRYLEGTREALPPNIEFVITLQIEEPKVTIDLQV    |
| Q9BPW8 | ERSQMLLSRRNQLLEFSFWNEPQPRMGPNIYELR TYKLP     |
| Q6PGD0 | QAYTAI IIDLQANPLKDDLANTFRGFTQLQTLILPQDVFCP   |
| Q86V81 | GGTRRGRGARGRGRGAGRNSKQQLSAEELDAQLDAYNAR      |
| P50294 | LDLATL TEVLQHQMRAVPFENLNMHCGEAMHLLDQIDFHI    |
| P20039 | NSQKDFLEDRAAVDTYCRHNYGVGESFTVQRRVHPKVTVY     |
| F7BWT7 | KTIDKERLNAQNI IHVRGCTNAVLIWFMNDYTIMAGLLGI    |
| P13366 | AKEETQQI I PVAKAIPHPAFNRKHGTNDIMLLKLESKAKRT  |
| Q9D9X8 | RTLASNGPNLCRIYCTDLLNNDLKDSIVCAMKIVQEPLGLG    |
| Q3SZC6 | ELRNRTPAAVRELVLNCKSNSDGKIEGLTAEFVNLEFLSLI    |
| Q6PHN9 | DVTSAESFVNVKRWLHEINQNCDDVCRI LVGNKNDDPERKV   |
| Q9H2J4 | RAIEMYRRRRLAEWKATKLNKFGEVLEISGKDYVQEVTKA     |
| Q9QYI6 | PDAEAKFREIAEAYETLSDANSRKEYDTIGHSAFTNGKGQR    |
| P35295 | NHPQSLFELEDRFLGLTETANNDCLEFAIVGNKVDLTSERDT   |

|        |                                             |
|--------|---------------------------------------------|
| Q3SWZ6 | NVAVVRMKRAGKRFEIACYKNKVVGWRSGVEKDLDEVLQTH   |
| A4FUA8 | EDGNVQLVSHKDVQDSVTVSNEAQTAKEFIKIEHAENEYQ    |
| Q9NWS0 | QTRPESTQIQPQPGFCIKTNSSEGKVFINICHSPSIPPPA    |
| Q3SX64 | TEGQIPETGLRKSCGTATLENGSGPLYVLPSTVGFINHDC    |
| Q8BTQ0 | EVPGDIKGEACSAKQHLDPNGETKADDNSNKETAEEKQEE    |
| P54369 | LLEFAEEQLQADHVFICFPKNREDRAALLRTFSFLGFEIVR   |
| P62241 | IDVVYNASNNELVVRTKTLVKNCIVLIDSTPYRQWYESHYAL  |
| Q9CRB5 | MFRKIVLDFLKDHKHMIETLNSCHTFSLVSPETLEEARKIS   |
| Q07326 | VPCLCLLGNLKAWLRFVSRNGVTSIWENSLQITTISSFVG    |
| P13600 | VNINNSVFKQYFFETKCRDPNPVDSGCRGIDAKHWNSYCTT   |
| Q3TB82 | EGVLTKECRKKAKPRIFFLFNDILVYGSIVLSKRKYRSQHI   |
| P45379 | NLEAEKFDLQEKFKQKYEINVLNRINDNQVSKTRGKAK      |
| O43315 | GENATAHIFATYPAPYLSLANAFADQVVATMILLIIVFAIF   |
| Q96AJ9 | LSHDREKIQRARERLRETDANLGKSSRIILTGLRRIIQNRI   |
| Q5E9K3 | VKQFAAWFEEAVQCPDIMEANAMCLATCTRDGKPSARMVLL   |
| Q07133 | GMSLAALKKALAAAGYDVEKNNSRIKLALKRLVNRKGVLVQT  |
| Q08DN6 | MISPLPLGDFRHTIHIHGGGNDTFGDISFLQKGFHLLPGTA   |
| A7Z070 | PFPQHINIITTPPPDEVFDNSGLSPGFLEYVVGSRSDSVST   |
| Q8BHE8 | ELVAKEVLQILKEKVTSLSDNHKNALAADIDDIVYSTGDI    |
| P0C866 | HTKHIAFLFDSTLTAFLMMGNLSPVQSTGEREAQRYFEHAL   |
| Q9P299 | YYDDTFPSMKEQMVFEKNVFNKTSRTESEIAFFGGMTIVYK   |
| P97371 | VHELDEAEYQEIIRLMVMEIRNAYAVLYDIIILKNFEKLLKPR |
| Q9UKJ0 | VNRLFLNWTEGQESGFLRISNLRKEDQSVYFCRVELDTRRS   |
| Q14B98 | PGSPPTPSGTGRRYWFVLKGNLLFSFETRESRVPLSLVVLE   |
| P09024 | AAGYGLEPSSFNMHCAFFEQNLSGVCPGDPAKAAGAKEQRD   |
| Q9HAV5 | RYKSSWGHHRQCSCITCAVINRVQVNCNATSNVAVCGDCLP   |
| Q8WVD3 | CPLCQESNFTRQLLDHCNSNHLFQIVPVTCPICVSLPWGD    |
| P10746 | NATASLVSKIIGLDTEGETCGNAEKLAEYICSRRESSALPLLF |
| Q8BQY8 | MMKSVVEKMRNINISQLVIEANLKGELNLKIETELVCVTHF   |
| Q9BPX1 | LLGTYTLTKLALPYLRKSGQGNVINISSLVGAIGQAQAVPYV  |
| P26452 | TIALCNTDSPLRYVDIAIPCNNKGAHSVGLMWWMLAREVLR   |
| Q9UNN8 | LWQADTQVTSGVVFTTLOQLNAYNRTRYELREFLEDTCVQY   |
| A8C927 | LFPWGTLLLEYVIKPNRDILSNVADLAKKEAHFEFVTTYSDS  |
| Q9EP52 | VSFLETVNQLHHQNVSPSNNVHAFPPSDKERMCTVVYFDD    |
| P11836 | QTIEIKEEVVGLTETSSQPKNEEDIEIPIQEEEEETETN     |
| Q4KL25 | GDSVSTPQAGYFGLFSYCVGNVLSSELICKGGPLDFSSIPS   |
| A0JLT2 | KKKEEDPDRKRKKKKEKKKKNRHSPDHGPGSSQASSSSSL    |
| Q9CR36 | KEQKKGPGGAPPKDLMYSVNPTRVEDLNTFGPKIAGMCRG    |
| Q13795 | ILGLDNAGKTTFLEQSKTRFNKNYKGMLSKITTTVGLNIG    |
| Q99J59 | LHCCGFNNYDFNASRFVKNKVFPPPCANPGNHTVEPCT      |
| Q9D7W5 | LLNQVADLKNLSGSFIYKLENEYDRLTWPVSLDSFALLSGQ   |

|        |                                            |
|--------|--------------------------------------------|
| P27814 | IGLRFTLPDMNWKWINGTTFNSDVLKITGVTENGSCASILG  |
| Q9CVB6 | YITFVLFPRHTNATARDNTINLIHTFRDYLYHYHIKCSKAYI |
| P07477 | ISLPTAPPATGTKCLISGWGNTASSGADYPDELQCLDAPVL  |
| P28230 | LLYPGYAMVRLVKCEAFPCPNTVDCFVSRPTEKTVFTVFM   |
| Q2T9T3 | HVVMTKEEVTELLARYKLRENQLPRIQAGDPVARYFGIKRG  |
| Q96MC5 | PLRRYGAVEETAWKTERLGRNQLDIISMAETMMPEEIELE   |
| P50553 | NFSGFGYSLPQQQPAAVARRNERERNRVKLVNLGFATLREH  |
| Q2HJ38 | QREQELREWIEGVTGRRIGNNFMDGLKDGIIICEFINKLQP  |
| Q2TJ95 | SGFYLHLGKCLDSCPEGLEANNHTMECVSIVHCEASEWSPW  |
| Q921D4 | SGSVLDYFSERSNPFYDRTCNNEVVKMQRLLLEHLNQMVGI  |
| P09056 | NGSANALFISYYTAQGEFFPNNVEKLCAPNMTDFPSFHNG   |
| P04467 | SNNDGKLELTEMARLLPVQENFLKFGVKMCKGKFNKAFE    |
| P26842 | HHTRPHCESCRHCNSGLLVRNCTITANAECACRNGWQCRDK  |
| P20783 | RCKEARPVKNGCRGIDDKHWSQCKTSQTYVRALTSENNKL   |
| P10897 | ALLFELGTYKSMFEPEGVLANVLGLLLATFATVILYILTRA  |
| Q5E9F2 | KLVMASLYHIYVALEEEIERNKENPVYTPLYFPEELHRRAS  |
| Q9CXE7 | KSDGVHTIETEDGDYMFCDNTFSTISEKVIFFELILDNMG   |
| P54107 | SEEAQNARIFSKYCDMTESNPLERRLPNTFCGENMHMTSY   |
| P08311 | IQNDIMLLQLSRRVRNRNVNPFVALPRAQEGLRPGTLCTVA  |
| A6NNA5 | VFAQTHYPDVTREELAMKINLTEARVQVWFQNRRAKWRKT   |
| Q077R2 | NYYIEKDFVITGVFSSPPEINYGAMLYKCNACSTVILDRT   |
| Q9JMF7 | RIAAPWPISEFFLIRDTSIIPNVLWFEYTVTRAARNRQRKL  |
| Q9JL99 | WEDSSVLRKNGINLSGNTENMNCAYLHNGKIHPASCKERH   |
| Q8VE42 | SRDTLELLLMNRYIKPELKNNSQETASDIARRTSIYHYLFE  |
| P58044 | GIWGEHEVDYIILFLRKNVTLNPDNEIKSYCVSKEEVREI   |
| Q08DY9 | VDAANLRETFMNLKYEVRKNDLTCKEMLELSMNSVKEDHS   |
| Q32LB6 | KPLPWRKILTFEQAVARGFFNYLEKLYEYLLKESLQMN     |
| Q56P03 | STMKTMEDKLSSLGTSSSGNGKVATAPTRYDDIYFSDS     |
| P25789 | RRNIHKLLDEVFFSEKIYKLNEDMACSVAGITSDANVLTNE  |
| P35293 | VILVYDVTRRDTFVKLDNWLNELEYCTRNDIVNMLVGNKI   |
| P51557 | HMRNMKGLRHQAVLAIGQELNWRALGDSSPGWVGQVRRRSS  |
| P54369 | GPRWCSDFVHPPLKIPGGRGNSQRDHSLSASILYSDERLNV  |
| P02522 | IIFEQENFQGHSHELNGPCPNLKETGVEKAGSVLVQAGPWV  |
| Q99N94 | MKNNVKWEINPEIVARHFFKNLGVVVAPHALRLPEEPI TRW |
| P13727 | WFTCRRCYRGNLVSIHNFNINRYIQCSVSALNQGVWIGGR   |
| Q8NDX9 | LSDSQIQWFYQALNLSLPLPNFHAGTEPDGLDPMVTLNLSNL |
| P50876 | CLESLDDDFLLIHYDKGPCRNKLGHSRASVIWHRTQVVGIF  |
| Q9D7M1 | HMMQRQKWSEVNQAVLDYENRESTPKLAKLLKLLLWAQNE   |
| P48507 | IGVAQLDSVITIASPPIEDGVNLSLEHLQPYWEELENLVQSK |
| P79103 | TNRERHPSGFDVVHVKDANGNSFATRLSNI FVIGKGNKPWI |
| Q91ZR1 | SRFAQENELMFLETSALTGENVEEAFKLCARTILNKIDSGE  |



|        |                                              |
|--------|----------------------------------------------|
| Q9GZW8 | ITTPQREKPGHMYQNE DYLQNGLPTE TTVLGT VQILCCLLI |
| P01909 | FALTNIAVLKHNLSLIKRSNSTAATNEVPEVTVFSKSPVT     |
| Q8BGC9 | TGIPFFYMTAKDPAVADLVKNPTASLVLPESSEGEFCRKNIV   |
| Q96L15 | LPPGFKAQNGIAIMVYTNSSNTLYWELNQAVRTGGGSRELY    |
| Q9BR61 | IFDYCRENNIDHITKAIKSKNV DVNVKDEEGRALLHWACDR   |
| P43307 | FEYSFIPAEPMGGRPFGLVINLNYKDLNGNVFQDAVFNQTV    |
| Q9H825 | ATFRILEVGCAGNSVFPILNTLENSPESFLYCCDFASGAV     |
| P01131 | ERTALRNGGCQYLCLPAPQINFRSPKFTACPDGMLLAKDM     |
| P41217 | MVTFSENHGVVIQPAYKDKINITQLGLQNSTITFWNITLED    |
| Q8BHX1 | LKKAELQLSAEKAKVDSRLQNMDFLKAKAAEFRFGIKAAEE    |
| Q9DBD2 | KVYLQLWKRLKAYNRVIYVQNCPE TSKKNI FEKSALTEPTL  |
| Q9Y2Q3 | FYDVLSPYSWLGFEILCRYQNIWNINLQLRPSLITGIMKDS    |
| Q91ZT9 | ACMVSDADCVELLEKGAEVNALDGYNRTALHYAAERDEAC     |
| P54821 | PQQDNDQLNSEKKRKRQRNRRTTFNSSQLQALERVFERTH     |
| P0DMD0 | FIVFMAIANVHFDEYLLVRKNLLISSKSIKPELDDILGDI     |
| Q9Z1Q5 | LDIFAKFSAYIKNSNPALNDNLEKGLLKALKVLDNYLTSPL    |
| P48023 | ARSSYLGA VFNLT SADHLYVNVSELSLVNFEESQTFFGLYK  |
| Q3SZ22 | RITDADVKNDRSSLHRKLDRLNLLLVKDKLGDQDVWMLPQA    |
| P28667 | EAAGASPAKANGQENGHVRSNGDLTPKGEGESPPVNGTDEA    |
| Q05195 | HGYASMLPYNNKDRDALKRRNKSKKNSSSRSTH NEMEKNR    |
| Q9CR10 | PRGNPTGPPCSLPPELEPPTNCCMSGPCNCVVDYAEALLR     |
| Q9GZV9 | RYLCMDFRGNIFGSHYFDPENCRFQHQTLENGYDVYHSPQY    |
| O43761 | QTLRVASWVFSIAVFGPIVNEGYVNTDSGPELRCVFNNGA     |
| Q9D7W4 | RERCGVPFSCCV RDP AEDVLNTQCGYDIRLKELEQEGSIY   |
| P50226 | SPFMRKGMAGDWKTTFTVAQNERFDADYAKKMAGCSLSFRS    |
| Q8VCQ3 | EEQATKIADLKRHVEFLVAENERLRKENQLKAEKARLLKG     |
| O88441 | LAVQAFLQMCNLPVKVVCRAEAEMSPSGKVPFIVHGNQVV     |
| Q9ULC3 | EALAKRLKLRFYRTSVKEDLNVNEVFKYLAEKYLQKLRQQI    |
| Q8N5I3 | QTGVRYVSIKPDNRKLANGTNVLGLLIDTLLKEGFHLVSTR    |
| P97760 | DEDESQAPYDPNGKPERFYNVESCGSLRPETIGLSALSGL     |
| Q2TAM9 | DEWDRQARLRQENARLRLENRRLKRENRS LFRQALRLPGE    |
| Q9D8X5 | TNEKGEYPSGINTWQFNFKFNLTEDMYSQDSIDLLANGLQ     |
| P15946 | TPDDLQCVS IKLLPNEVCVKNHNQKVTDVMLCAGEMGGGKD   |
| Q9Y6N3 | PYTLQYGQCGDKGQYIHFTPNFLLTNNLATYGPRGKVFVHG    |
| Q96MU5 | EKRCHSLKRLRYSVCKVCNFCACGKENVSGTGQVCTGVH      |
| O95661 | FMEISAKTDVNVQELFHMLLNKYPKPTGLQEPEKKSQMPN     |
| Q9CXM0 | TSGACPDLYQWSDGSSSQFRNWYTDEPSCGSEKCVVMYHQP    |
| Q9BWT6 | VEEIRQANKVAKEAANRWDNIFAIKSWAKRKFGEENKID      |
| Q7L2Z9 | LALLQEEIDKMOVETTELMTGNIQSLKNKIQILASEVEEEEE   |
| P09601 | FTFPNIASATKFKQLYRSRMNSLEMTPAVRQRVIEEAKTAF    |
| Q8R4V1 | QHRPGMENHTRDCMVKLSQANTSATGIYYFIVEGEETYQSD    |

|        |                                             |
|--------|---------------------------------------------|
| Q3LUH2 | IIQQLNKTFYSYFLGLSDPQGNQWQWIDQTPYKENVRFWHQ   |
| P33784 | GLTARPDAFISGAESLLSQENGSQHIAGAWVTSLSDVRFNF   |
| A1YIY0 | DIQFWTPVSHPVLTQLQHEATNLAVGDKVEFLCEAHQGS LPI |
| P14439 | GALANIAVDKANLDMKKRSNNTPDANVAPEVTVLSRSEVN    |
| Q8K2Q2 | DLKVALRQELCNMEEILEYQNTFFGGDCIS MIDYLVWPF    |
| Q8VEE0 | MHMMVSRPEQWVKPMAVAGANQYTFHLEATENPGALIKDIR   |
| P29965 | ASSKTTSVLQWAEKGYTMSNNLVTLENGKQLTVKRQGLYY    |
| Q3T113 | ENYILDTEFGLQESLKCVAQNHRDEELWYREDGRVDLKS     |
| Q2KJA5 | LCSSYMEVPTYLNFKSMNHMNYLPSQDGMTHNQFIKIMIF    |
| Q99623 | AYGVRESVFTVEGGHRAIFFNRIGGVQDITILAEGLHFRIP   |
| A2RU48 | QLLDCLSDSFDVTNKLTEVLNMLGCRLASIEMKRDGTIKE    |
| Q8K572 | NEICLELMSEHLARAVKNAGNASSLKLQLTNKQRCLTLVV    |
| Q8IZJ6 | NNRITWLFHYSALLSAFGEANVSLARAVNITGLHNILDVAA   |
| Q9DAM2 | DLDGEMNIGAANFQNYRFLFN IKKQELRDLFHDFTITGDRL  |
| Q7Z4H3 | DLEHKPGRLQDFYDSTAGKFNHPEIVQLVSELEAERSTNIA   |
| Q9CQY8 | LLWFFNGTCVSPDFKNPTINMVS NWKIPNSNSEEDRHRI    |
| P46777 | SVTPDMMEEMYKKAHAAIRENPVYEKKPKKEVKKRWRNPK    |
| Q01362 | LSIISERRNATYLVRGSLGANTASSIAGGTGITILINLKK    |
| Q5XFR0 | FFSRTSKENVEADHRVSVFVGNVDYGGSAAELEAYFSPCGEI  |
| Q95IE3 | LLVCSVSGFYPGSIEVRWFRNGQEKTGVVSTGLIHNGDWT    |
| Q3T0P5 | LLTLVNRKVSQRRVDFCRDPNAIGKKQVPCFASMLTKKLHF   |
| Q59I47 | EPQPSPRSLAEGFLQEELRLNDELRLQFSELVGI VYNPVE   |
| P05528 | NYCLYLVGRRESGFIATFVHNMDGRLLFIRS QLIASLIMSI  |
| Q9UKR0 | CATAGTECHVSGWGITNHPRNFFPDLQLCLNLSIVSHATCH   |
| Q3SZX5 | GAQIIKEVLLAQDMAVRDHNVEFRSNLYIAESTSGRGQYL    |
| P97805 | NVVGPSMCFEDEIIMSPVRNNVGRGLNVALVNGSTGQVMKK   |
| Q9CWD3 | EILECGFRELWEECGLQLPKNQFSCVLLGLWESAYPPRLSW   |
| Q7Z5P4 | IYRSLNQVKEVGDVTIVVNNAGTVYPADLLSTKDEEITKT    |
| Q96GY3 | RRKKRREDDGLAEGGPQRSNTYVIKLFDRSVDLAQFSENT    |
| Q43423 | DLSTIEPLKQLENLKS LDFNCEVTNLNDYGENVFKLLQL    |
| Q9EQ06 | ELAALGRGTGVRTSCLCPNFINTGFIKNPSTNLGPTLEPEEV  |
| Q9GZT6 | MAHLDAIRKDMVILEKSEFANLRAENEMKMIELDQVKQQLM   |
| Q3T110 | GICFSGIMMLVVAVLLVLENDNNYKCCQSENC SKKYMTVL   |
| Q6ZMJ4 | GIFLGVALGNEPLEMWPLTQNEECTVTGFLRDKLQYRSRLQ   |
| P19071 | FRDHVTDPEAQRRFNSLKTNILAKRYRAYIRVMEPMKSGR    |
| Q9UFN0 | YWSVEFGGRMNTVFHIIWKYDNFAHRTEVRKALAKDKEWQEQ  |
| Q9WTY4 | IGLSVTLGHLVGIYFTGCSMNPARSFGPAVVMNRFSPSHWV   |
| A5D7P8 | KNSMNSNNVGTGTGFGPMGNGVQTGAEARGCQFSYAGRSN    |
| Q32LN5 | QENTGSSGHPTFKCPLCQESNFTRQLLDHCNSNHLFQIVP    |
| Q58DV7 | PSAEQITKYKELVAKTSNLENIKFAWHKETSSEYQNRMM EK  |
| P14437 | GGLQNIATGKYTLGILTKRSNSTPATNEAPQATVFPKSPVL   |

|        |                                             |
|--------|---------------------------------------------|
| P14191 | GNVLNDLTNGGTKLTIITVTGNKPILLGRTKEAFATPVTSKV  |
| A6NKC4 | LNGTATQTSTPSYRITSASVNDSGEYRCQRGLSGRSDPIQL   |
| Q12829 | QAQAYAERLGVTFEVSPLCNFNITESFTELARIVLLRHGM    |
| Q9D9R0 | LPSEGVPAATDIAKRMKSEYQCAECGLTVLCLSDMRAHIRT   |
| P31267 | LEKEFHFNRYLTRRRRIEIANALCLTERQIKIWFQNRMMKW   |
| P02702 | VAAAWGAQAPRTPRARTDLLNVCMDAKHKAEPGPEDSLHE    |
| Q9ER00 | KLQENLQQLQHSTNLAKETNELLEKELGSLPLPLSASEQRQ   |
| P23184 | DESLIDKDKGKEFLITTVGVINKTKTSPLVWNSVVIISDVPHL |
| Q9JJ69 | FEDFVAGLSVILRGTIDDRLNWAFNLYDLNKDGCITKEEML   |
| Q8TDC0 | KVTGTAESGTVANANGPEGPNYRSELHIFPASPASLGGEPE   |
| Q80WR1 | REHLTREFFTKELTKHYQGDNDTDVFSATWNSVMITFGCCG   |
| Q9HB31 | TFSKGQLELELERAFAAWPYPNISTHEHLAWVTCLPEAKVQV  |
| Q3ZBG6 | VFIDCVGVGLLISLTMWFISNKYLVKRQSRDYDVEWGYAFD   |
| Q9P016 | SGEALAKVEDSNPQKTSATKNCLKNLSSHWMKSEPESRLE    |
| P51149 | QAFQTIARNALKQETEVELYNEFPPEIKLDKNDRAKASAES   |
| P06804 | TLFCLLNFGVIGPQRDEKFPNGLPLISSMAQTLTLRSSSQN   |
| Q9BXJ0 | RPLLVLLLGLAAGSPPLDDNKIPSLCPGHPGLPGTPGHHG    |
| Q02013 | VATAILSGITSSLDVNSLGRNDLAHGVNSGGQGLGIEIIGTL  |
| Q96DC9 | YSVVELVEKDGSVSSLLKVFNDQSASDHIVQFLRLTSAFI    |
| Q8BH93 | VTNTRKAGHSSQGWPGSSPWSNPSAPPAMPGLPPSSAAFST   |
| P61026 | YRGAMGIMLVYDITNGKSFENISKWLRNIDEHANEDVERML   |
| Q9D9S2 | NISIYLNLIIGLQFSYMSQNKCVHLLVGLSFFAGCLLFY     |
| Q15125 | NAGPLHPYWPQHLRLDNFVNDRPTWHI LAGLFSVTGVLVV   |
| O55125 | AHSTLLSKKETSPLYKIQFHNKPECLDAYNSLTEAVLPKL    |
| Q68D91 | KVLPGHFNTFGAERLFRASNYISKAGICHKVSTFAMRSLA    |
| Q8R2H9 | LLQFIKQGSCEVILISDANTFGVESALRAAGHHSFRRI      |
| Q9JL95 | VRTPETFDKAQRVCRRCYRGNLASVHSYSFNYQIQNLARKI   |
| Q9Y691 | TLLRSYMQSVWTEESQCTLLNASITETFNCSFSCGPDCWKL   |
| Q96MH2 | QRASRVREEMFAKQPVAPYNTTQFLMNDRDPEEPNLVPH     |
| Q1LZA1 | KVGQANPNLQKVLDAKAVKNKNKAPFTNFDPSVLLPESL     |
| P02745 | AIRRNPPMGGNVVIFDVTITNQEEPYQNHSGRFVCTVPGYY   |
| Q80WR1 | AMGGLLFLGLGFCGAVRENRCLLFFFLILIIIFLVELS      |
| P60880 | GIIGNLRHMALDMGNEIDTQNRQIDRIMEKADSINKTRIDEA  |
| Q9QWG7 | WWEKREEHPLLYLYEELKQNPKEIKKIASFLDKTLDEEA     |
| Q9D593 | KIQLSTMRNQARITVLRARDNLILELLKDAKMRLSRIVSDE   |
| P05813 | IGRQWEISDDYPSLQAMGWFNNEVGSMKIQSGAWVCYQYPG   |
| P00766 | FDQSSSEKIQKLIKAKVFNKSKYNSLTIINNDITLLKLSA    |
| P43307 | EMGTSSQNDVMSWIPQETLNQINKASPRRLPRKRAQKRSV    |
| Q9CQ07 | RKIPDSIAKFQNLRWLDLHSNYIDKLPESIGQMTSLLFLNV   |
| Q6NUI1 | SIQQLVPEYKEKQTPESLPQNNNPAAPSQAEGGEGGVACGT   |
| Q3UWA4 | LCCEELQSPHEQSHTELSIENAI SHYKERLNRRSRKLKDL   |

|        |                                            |
|--------|--------------------------------------------|
| P56746 | TNTIFENLWFSCATDSLGVYNCWEFPSMLALSGYIQACRAL  |
| Q3T0P5 | ERFFWHLTLPNRPGTSADRDNLRRRFSDLGFVCKCFDDLRA  |
| Q96LD1 | LLLVMTIVNLAMTIWIILKVMNFTVDGMGNLVRTKKGIRLEG |
| O70514 | PHSTAEEGVEGSAPSLGKAQNKQRSRTSKSLTHGKFVTKDQ  |
| Q8K201 | VLALLLVPLVLCSDRSENPPNNATVSSPVVVTAPGNHTSPSV |
| P23025 | CGKEFMDSYLMNHFDLPTCDNCRDADDKHKLITKTEAKQEY  |
| Q9UNT1 | GTNVVKLFNDAIRLAVSYQNSQDFMDEIFQELENFSLEQE   |
| Q3KNW1 | KTHSSHVRVFNRRLETQREINGACACGGLVPLLRDKEA     |
| A5D9C6 | DFSTARSHFESREPSLSWVNAVNCSLFSAVREDFKALKPQ   |
| Q8N9N7 | TVLPDEICNLKLETLNHLRELSTFGQLSALKTSL         |
| Q4JM65 | ATLGTAGENYVNIQQTVKYFNSQQQITDLFPNYPLNIQPED  |
| Q5E9V3 | FKVPDFDLLLLTDPFMAFANPLSGRRSFNRTPKGWISENI   |
| Q925U0 | GWTEDMRARRDEQTVPMVQPNLSTSSDDHVVSTEPWASETS  |
| A2A8T7 | FLGLCSVLIGSCILFLHWKKNLQREERAQQWVEVMRAATFT  |
| P16110 | DVAHFHFNPRFNENRRVIVCNTKQDNNWKEERQSAPPFES   |
| P28585 | SESEPNLLNQVEIKKSDLVNYNPIAEKHVDGTMSLAELSA   |
| Q61142 | TEDGSKDEWRGMVLARAPVMNTWFYITYEKDPVLYMYQLLD  |
| Q9CQF3 | YIQQTKPLTLERTINLYPLTNYTFGTKEPLYEKDSSVAARF  |
| Q15006 | GGLENLELSRKYFAQALKLNNRMRALFGLYMSASHIASNP   |
| O95858 | LIGGVVALTFRNQTTIDFLNDNIRRGIEYNYDDLDFKNIMDF |
| P10746 | AMESITVYQTVAHPGIQGNLNSYYSQQQVPAISITFFSPSGL |
| Q0VD07 | LYAGVALFCGCGHEALSGTVNIIQTYFEMARTAGDTLDVFT  |
| Q9R0H2 | INSLTTPKHEVGTTEGPLRNESSTMKIIVPNTPTSANST    |
| Q91VX5 | VDHGNGTFSVHFRHNATGQGNISISLVPPSKAVEFHQEQOI  |
| P35282 | VVLLGEGCVGKTSLVLRVCENKFNDKHITTLQASFLTKKLN  |
| P50195 | SSHEEWRNSELARQQQKTIQNHVGTFFHQKILGHVEGWDMG  |
| P30044 | APIKVGDAIPAVEVFEGEPGNKVNLAELFKGKKGVLFGVPG  |
| P10628 | PGTALKQPAVVYPWMKKVHVNSVNPNTGGEFKRSRTAYTR   |
| Q9DCK3 | QQDLKGLHLYGTQGNVGLTNAWSIIQTDFRCCGVSNYTDW   |
| P09630 | RTAPQDQKASIQIYPWMQRMNSHSGVGYGADRRRGRQIYSR  |
| Q3MHP2 | RIVSQKQIADRAAHDESPGNNVVDISVPPTTDGQKPNKLQC  |
| Q08DT6 | QTLASTGCRFSLSLTKNTPNVTSFHCRLQTTLRRLGLE     |
| Q3ZC52 | VPNKSLTYGVILTHGASGMNLPHTSLASHLASHGFFCLR    |
| P50518 | IEQEANEKAEETIDAKAEFEFNIEKGRVQTRQLKIMEYYEK  |
| Q61166 | RMGVDKIIPVDKLVKGFQDNFEFVQWFKKFFDANYDGKEY   |
| Q80W21 | DGSHKITQSNAILRVLGRKHNLCGETEEERIRVDILENQLM  |
| P53811 | CAYKLVTIKFKWGLQSKVENFIQKQEKRIFTNLHRQLFCW   |
| Q719H9 | DKSLIEEVFPEIGDVMCNSVNAGWNHDSHVIRFPLNGYCH   |
| Q3SZ22 | TAERTLATLSENNLEAKFLGNAPCGHYKFKFPQAVRAEGSL  |
| A5D989 | SSRQENGASVILRDIARARENIQKSLAGSSGPGASSGPGSD  |
| Q58DS5 | LLIGDSGVGKTCIIIRFAEDNFNNTYISTIGIDFRIRTVDI  |

|        |                                            |
|--------|--------------------------------------------|
| Q2KJD9 | YFRAWLGPDRTRVEGWFLLDNYVPTLVCSILYLLIVWLGPK  |
| O95976 | ARRIFQEIAQELYHKRHVETNQOSEKDNNTYENRRVLSNYE  |
| Q28151 | HTGEKPFCEKDCGKAFIQKSNLIRHQRTHTGEKPFICKECG  |
| Q49B24 | VMLVITVVLSTSGIWRSSSGNLLKSDSFPSRNKDNQSQPT   |
| Q99L85 | CVTLCQALHALSQQNGDPGDNSLVEQVRVLGLLHEELHGPG  |
| Q9GZ27 | RLRGPRGVPAGTAVTPNYVDNVSARVAPWCDCGASGNRRED  |
| Q9CX63 | PANFSLPLSQTTGWFQCEAENDVGVDSARIPLPRAEARAK   |
| Q9DB25 | ATLERYVETQAKENAYDLEANLAVLKLYQFNPAFFQTTVTA  |
| Q3ZBM4 | LALKTTDANNQEYSLWVYQCNSLEQAQAICKVLSTAFDSVL  |
| Q9BUN8 | PITATFFYFPVGPPTGFLYLVNLYFLYQYSTRLETGAFDGRP |
| P15483 | DINSEGQIEWGIRDGNLVAKNKTPYYFTIVNASFNGKALKT  |
| Q9D4G1 | LLLLQALGIVALGHFTKAQNNTLIFTKNTIRNCSCPVDIR   |
| P97447 | TREDSPRCKGCFKAIVAGDQNVYKGTVWHKDCFTCSNCKQ   |
| Q9WV55 | SDLKFKGPFTDVVTTNLKLNPSDRKVCFKVKTTPAPRYCV   |
| Q1LZ75 | PGGAEATRPVGPPEPLAETPNQAPKPGAKSNSIIVSPRQRG  |
| Q92813 | AEGATCHLLDFASPERPLVVNFGSATUPPFTSQLPAFRKLV  |
| Q01151 | RMETPQEDHLRGQHYHQKQNGSFDAPNERPYSLKIRNTTS   |
| Q3T033 | YVKPQSCIDIVIRHVAPHPRNYDVQDRFRIELSEEGTEGRV  |
| A8C927 | DRVHIDLGTGDGRNIYKLAINDQNTFYIGIDPVKENLFDIS  |
| Q9BY71 | IGSATFAGLAGGLRLDLSYNRIQRIPKDALGKLSAKIRLS   |
| Q9NRD1 | FQHGGRTQYWAGWYGPVRTNSSIVVSPKMTRNQASSEAQP   |
| Q9NYV7 | CSYFNLNYVLCNLTITWEFFNILTFWLNSLLTVFYCIKVVSS |
| Q9ULC3 | LAKRLKLRFYRTSVKEDLNVNEVFKYLAEKYLQKLKQQIAE  |
| Q3T0P7 | VIPLNTSIVMPPKNLELLINIKAGTYLPQSYLIHEHMVIT   |
| A5D7P8 | AEARGCQFSYAGRSNRRGPIPNQLPGTANNQTVMTTISNGR  |
| Q8N0Y7 | WRRSYDVPPPPMPPDPHPFYSNISKDRRYADLTEDQLPSYES |
| Q8NF67 | SLKKLTMLESPLLEGISHYHINLDETVQVKKKLFQVESQFDD |
| P70452 | AQLKAIEPQKEEADENYSVNTRMKKTQHGVLSQQFVELIN   |
| Q5VZ72 | AVQQVVKLRTWLKNEFYKLGNETWKGVIYQGGKLLDVCQNL  |
| Q91VF2 | KYECYDLVSTMDITDCFIDGNENGDLLWDFLTETCNFSKTA  |
| Q9DB29 | DSSLKDENPKQHVPLEDEYSANLRDMVQYLRSDVPRERVIL  |
| Q9UKL6 | SLAIESDGKKGSKVFMYYFDNPGGQIPSWLINWAAKNGVPN  |
| Q9NPC3 | GTLEPSMIAQSGVLGFLGNNSKFPDNTPVRNRGDGDGDF    |
| Q0IIN9 | PIAVELEFENQPLGAETRLRNGRRAGVKRSEGRGQVRPGQV  |
| P11032 | DEYTREGDLQLVRLKKKATVNRNVAIHLHPKKGDDVKPGTR  |
| P40306 | TALGSGQDAALAVLEDRFPNMTLEAAQGLLVEAVTAGILG   |
| Q3UX61 | HRRLGLAQKLMDAQSRAMIENFGAKYVSLHVRKSNRAALHL  |
| P51749 | VLQWAPKGYTLSNNLVLENGKQLAVKRQGFYIYTQVTF     |
| P35846 | PEDNLHDQCSPWKTNSCCSTNTSQEAHKDISYLYRFNWNHC  |
| O60248 | FMVWSSAQRQMAQQNPKMHNSEISKRLGAQWKLLEDEKRR   |
| Q8VHP9 | CPSPLSGITPLLYVAQTRQSNILKILLQYGILEREKNPINI  |

|        |                                            |
|--------|--------------------------------------------|
| O88346 | QLESEKFDLMEKQKQKYEINVLYNRISHAQKFRKGAGKGR   |
| Q8CDN6 | DQYQGADAVGLEEKIKQHLENDPGSNEDADIPKGYMDLMPF  |
| Q8BL86 | RQFRVQAVQPTLILQDGDVINLGRQLTVMHMPGHSRGSIC   |
| P03038 | TADAQLRFLCEAGFSAGDAVNALMTISYFTVGAVLEEQAGD  |
| Q9Y5X0 | CVSGQTKYSVEEAIHKFALMNRFPPEEDEEGKKENDIDYDS  |
| P10738 | YRQLFTKNQFHQAMKHAKVNNLSTVTYEQVLSIFNSYLLFN  |
| O00233 | SPASIAGLQVDDEIVEFGSVNTQNFQSLHNIIGSVVQHSEGK |
| O35566 | GVVVMVTGVLGCCATFKERRNLLRLYFILLIIFLEIITAG   |
| O70578 | AIFSLGFIIVGSICAFLSFGNKRDYLLRPASMFYAFAGLCL  |
| Q3SZ19 | IEAQIKANYEVLESQKIGMNEPLVDCEGYPRADVLDYQVR   |
| Q58DS3 | TRMQLQGEELRAPGTYQRHYRNVFHAFITIGKVDGLAALQRG |
| P61981 | TELNEPLSNEERNLLSVAYKNVVGARRSSWRVISSIEQKTS  |
| Q15072 | HTGEKLFECNECGKSFQKSNLLTHQKHTGEKPFPECKDCG   |
| Q9CQJ0 | QEFLEKTKSGGWIKLPSFKSNRDHIQGLKLPFGLETASDKQ  |
| P46926 | KKLIEYYKNGDLSFKYVKTFFNMDEYVGLPRDHPESYHSFMW |
| P47755 | CFKFDHLRKEATDPRPCEVENAVESWRVSVETALRAYVKEH  |
| Q8VDV8 | KYLDQEKEDGKYHKQIKIEENATGFSYESLFREYLHETVTE  |
| Q9Z1P5 | ALPCSCDNISGCSDVSDKNLNCRPPCQESLHCILDDVCI    |
| Q9DBZ5 | ITYQHIDRWLLAEMGLDLDNQLKVMMSKYGWSADESGQVF   |
| P31275 | VSPLNPGGGLSASGAPWYFINSRKRKRKPKYKQLAELEG    |
| O54831 | LSINGLFHNAMELRTWNIKNLNMELRKYTVNQVSEKLYENY  |
| Q8SPU5 | APSGLLGSLGKVTSLTPLLNNIIEKLTNPQLELGLVQS     |
| Q6XJV6 | HKVYDLQVLVPEVYFLGENRTAVCEAMAGKPAQISWTP     |
| P09211 | DMVNDGVEDLRCKYISLIYTNYEAGKDDYVKALPGQLKPFPE |
| Q8VC33 | RNNSDQDEVETEAELSRRENRLVLLFFGAGACPQCQAFAP   |
| A0PK84 | GALFLFLSANALGNYVLVIQNSPDDLGTGQGTMSQRPQCPP  |
| P61006 | EKLALDYGIKFMETSAKANINVENAFFTLARDIKAKMDKKL  |
| Q03255 | RPMNAFIVWSRERRRVALENPKMKNSDISKQLGYEWKRLT   |
| P47754 | EDGNVQLVSHKDIQDSLTVSNEVQTAKEFIKIVEAAENEYQ  |
| Q96DR4 | LENFEENCCVMRYTTAGQLWNIISPREFVDFSYTVGYKEGL  |
| P56750 | GIFVLI PVSWTANIIIRDYFNPAIHIGQKRELGAALFLGWA |
| Q6UXN2 | TIWDKPNAGFFNITMIQLTQNDSGFYWCIGIYNASENIITVL |
| P21107 | RAELAESKCELEELKNVTNNLKSLEAQAEKYSQKEDKYE    |
| P33792 | NSKEREYIYVTLSELISEKNRRDEIFYNADNVPLWPISAE   |
| P20934 | SPTAEIKSQGETFKKEVCEENTSNAMLICLIVIAVFLIC    |
| Q8BGT7 | QRIKELEQEREDQKVKWQQFNNRAYSKNKKGVKRSIFASP   |
| O70439 | GTPQDSPELRQLLQKQYTNQLAKETDKYIKEFGSLPTTP    |
| Q61199 | VVEFEISPQSTLETESKSFNCHIEYEKTDRAKKTALCNFD   |
| Q0IIG7 | AQAAIVVYDITNEESFARAKNWKELQRQASPNIVIALSGN   |
| Q96PP4 | NGKSKTSENSSAKREKGMVNSKEISDAVGQSKFVLENLRH   |
| P47758 | GQYRDTQTSITDSSAIYKVNRRNRSLSLTLIDLPGHESLRFQ |

|        |                                            |
|--------|--------------------------------------------|
| P07738 | RLNERHYGALIGLNREQMALNHGEEQVRLWRRSYNVTPPPI  |
| Q1W209 | QPLSPFNLGATLQSLPSLNFNSFHSLVETKTCFIREPKTP   |
| P52946 | RTRTAYTRAQLELEKEFLFNKYISRPRRVELAVMLNLTER   |
| A6NLU5 | VSHIQSSGPRRHGPASAANANNAGAASRTTSEPGRGDKSPP  |
| Q9D6Y1 | RSLRQARKNSRHLELVNQKLNKLGASSAQQHINALGREPV   |
| P70195 | ATEGMVVADKNCISKIHFISPNYCCGAGTAADTDMTTQLIS  |
| Q9UBV8 | GPAPGGPYGPPAGGGPYGHPNPGMFPSPGPGPYGGAAPGG   |
| Q8C767 | LALTMVKVFSEFDDPLDIFFNITELLDNIVSLTTAESESVF  |
| Q8TBG9 | CGGYSGLRLSVDCVNKTESNLSIDIAFAYPFRHLHQVTFEV  |
| Q4JM65 | HQGCLVNSFGNLPWGNQTWNNPTWSNQSWSNSQWSNHSWN   |
| Q29S19 | EKTAAEKPRVLEPGAAPFGNFPHYSRFHPPEQRLRLLPPE   |
| Q13261 | TTEISSHESHGTPSQTTAKNWELTASASHQPPGVYPQGHS   |
| P28161 | RKHNLGGESEKEQIREDIENQFMDSRMQLAKLCYDPDFEK   |
| P52945 | RVELAVMLNLTERHIKIWFQNRMRKWKKEEDKKRGGGTAVG  |
| BIATL7 | NVSWEVSGGPPALIVGGTKVNNGGTERGSNNARLHVALPQG  |
| P35219 | SLLDVRLSPNYVVCRDCEVTNDGHTIQVILKSKSVLSGGPL  |
| Q9D1G5 | GALPPQLCCLRHLDVVDLSKNQIRSIPTDVGELQAIELNLN  |
| Q0P5A4 | EQKAKALKGQYNFDHPDAFDNDLMHRTLKNI VEGKTVEVPT |
| Q8BVN8 | DMERKITELETEKRDLERQVNEQKAKCEATEKRESERRQVE  |
| Q3V009 | ARDRNLQEDNLERVNFWSAANVAVLLLVAVLQVCTLKRFFH  |
| P20231 | ASETFFPGMPCWVTGWGDVDNDRLPPFPPLKQVKVPI MEN  |
| Q8R2R5 | LTHLGPLASLRQLAVLNVSNRRLTGLEPLAACENLQSLNAA  |
| B6A8R8 | GHYTCEYYSKWPHTPSHPSNALFLLVTGYLPQPSFQAHRH   |
| Q8NHM4 | GFLEGGKDSQCQGDSDGGPVVCGQLQGIVSWGYGCAQKRRPG |
| Q30167 | RWFRNGQBEKTGVVSTGLIQNGDWTFTQLVMLETVPQSGEV  |
| Q6GPI1 | DFPAGTLCATTGWGKTKYNANKTPDKLQQAALPLLSNAECK  |
| Q9D780 | NLSLEIPSNEEIKHIDWLFQNNIAIVKPGKKGQPAVIMAVD  |
| Q8N131 | PHNSSANSTETLQHVPDHTNETSNSTVKPPTSVASDSNT    |
| Q88551 | ATAWYGNRIVQEFYDPLTPINARYEFGQALFTGAAAASLCL  |
| P19217 | EVMNQKVSFFMRKGDVGDWKNHFTVALNEKFDMHYEQQMKG  |
| Q8TD07 | ATNGEKSLLDAMNMTWTVINHEASKIKETWKKDRGLEKYF   |
| Q58DI5 | GAGSSQALPPQLPEEDRIDLNPSFLGIALRSLLAIDLWLSK  |
| Q60809 | VKWSLFHSGYDFGYLIKILTNSNLPEEELDFFEILRLFFPV  |
| Q9CQU5 | EFMRNSRKKDKLLCSQLQVVNFLTQTFLAQEDTEQSPDALAS |
| Q6P073 | RFKCNTRLCLSITDFHPDTWNPWSVSTILTGLLSFMVEKG   |
| Q3T0A6 | LRIFKWPVTDSEKEKSKSNSSAAREPNGFSPDASANSSL    |
| Q8CFP6 | REIKVNI FDMAGHPFFFEVRNEFYKDTQGVILVYDVGQKDS |
| Q99714 | QTHTLEDFQRVLDVNLMGTFNVIRLVAGEMQNEPDQGGQR   |
| Q96II0 | WIGPPDKYSNLRPVHFYI PENESPLEQKLRKLRQETQEWNQ |
| Q91VK4 | VIELNTTIVLPPRNFWELLMNVKRGTYLPQTYIIQEEMVVT  |
| Q99KK1 | IVQAKERGYETMVNFGRQGLNAAAAAVTAAVKSQGAITER   |

|        |                                            |
|--------|--------------------------------------------|
| Q8BJN4 | YYHIMYRPNWNSIFSGYLRYNFHHEEKVPRITITSVALEHLA |
| P41238 | YEIKWMSRKiWRSSGKNTTNHVEVNFIKKFTSERDFHPSM   |
| Q3SZ18 | RNSDKSIPMTVDFIRLKSycNDQSTGDIKVIgDDLSTLTG   |
| Q9NX07 | PVEYSQMYSYSYNQYQQYQNYAqWGYDQNTGSYSYSYPQ    |
| Q4VAE3 | QEKLEALPPTPGQLRYVFFHNAIPFVGFGLDNaimivAGT   |
| Q86SE9 | DDKDYHRSDPQIAICLDCLRNNGQSGDNVVKGLMKKFIRCS  |
| Q9JKF4 | SLTCFSEGTMVSEKMWGCCPNHWKsFGSSCYLISTKENFWS  |
| Q9D6I9 | MELAYLRAIDVKILQQLVTLNEGIEAVRWLLEERGTLTSHC  |
| Q9NVK5 | LEQENKGLREILQITRESFLNLRKDDASESTSLsALVTNSD  |
| P17981 | RFRYTGKGSVRFGHFASSSLNRSVATSSFFFNQGTFLFIK   |
| Q2LGB7 | IIFAEMPCGRQHLQNLDDAVNGSAWTILLTENFLRDTWCK   |
| Q9DB76 | NQVDVWGAQAGLVVAGYYHANAVLDDQSPGPLALKIAGRIA  |
| P52907 | APPGEFNEVFNDVRLLLNNDNLLREGAAHAFAQYNMDQFTP  |
| Q5UCC4 | VTHPGGCRGHEVEDVDLELFNTSVQLQPPTTAPGPETAAFI  |
| Q16635 | CHLNPIILPLWHVGMNDVLPNSPPYFPRFGQKITVLIGKPF  |
| Q8WVC6 | PGYPAHRRIVEVFGTEVLENGDINRKVLGDLIFNQPDRRQ   |
| Q6DKI1 | ELILKRGQAKVKNKTIPLTDNTVIEEHLGKFGVICLEDLIH  |
| Q9H213 | FQGTKKSLMSILALIFIMGNSAKEALVWKVLGKLGMPGR    |
| P12319 | TKWFHNGSLSEETNSSLNIVNAKFEDSGEYKQHQVNESE    |
| P02970 | GNVLNDLTNGGTKLTIIVTGNKPILLGRtKEAFATPVSGGV  |
| Q32L19 | EVLQSLVDDGMVDCERIGTSNYWAFPSKALHARKRKLEVL   |
| Q9R9D6 | RLRDVGVDtMYGVAfGEGKGMNPLTRTSFIITEDLTPTISLE |
| P09601 | PQDLSEALKEATKEVHTQAENAEfMRNFQKGQVTRDGFKLV  |
| P51959 | GRDLTFWQELVSKCLTEYSSNKCSKPNVQKlKWIVSGRTAR  |
| Q5E9K2 | QVSRATQGEQDNYEMHVRAANIVRAGESLMKLVSDLKQFLI  |
| Q2TBT8 | PLAHRKGHQDSCPFELMVCpNEGCMlRvPRGALDEHRQNCQ  |
| Q8BHI7 | IQTYNKKGASRRKDHLKGHQNGSVAAVNGHTNSFPSPLENSV |
| Q9JJ69 | FFPQGDSSNYATFLFNAFDTNHDGSVSEDFVAGLSVILRG   |
| P43431 | DITRDQSTLKTCLPLELHKNESCLATRETSSTTRGSClPP   |
| P04230 | NSQPEFLEQKRAEVDtVCRHNYEISDKFLVRRRVEPTVTVY  |
| P02663 | EHVSSSEESIISQETyKQEKMAINPSKENLCSTFCKEVVR   |
| Q96DR5 | LVLLCGVLTGTSESLLDNLGNDLSNVVDKLEPVLHEGLETV  |
| Q32KW7 | AAARDGTLQPGDVLISVGYANVLGYTLREFLKLLQHITIGT  |
| Q17QF8 | VGI PGWVCGWIATISFFGTNIGSAVVMlIPTVLFtVMAVF  |
| Q8IZS5 | INPRQCATEVSREDDRI FYNRLTKLFDESrQGEpQDESGR  |
| Q3KRB8 | ILLLSCLLADHTVHVLYFFNfLrNVSLRSSENKMDSsNLA   |
| Q3ZBW4 | EAVAIEMNepVQLTFALRYLNFfTKATPLSPTVTLsMSADV  |
| Q8NHG8 | NGRTRAYSGSDLPSSSSGGANGTAGGGGARAAAAGRFPAQ   |
| Q9QWG7 | ARNGKDVAVSYYHFDLMNSINPLPGTWEEYLEKFLAGNVAY  |
| Q8R0K4 | DVAYVQRMEQEAQHVLFLSKNQAPRQPEVQAAPKKEKSERK  |
| Q0V7M7 | EADIKFTTLKVDKRFHGILNLRHCRRLSEVRGKGLTRYV    |



|        |                                               |
|--------|-----------------------------------------------|
| P19388 | HVVMTKEEVTELLARYKLRENQLPRIQAGDPVARYFGIKRG     |
| Q9D287 | IENLELMSQHGCNAWKVYNENLVHMIIEHAQKELQKLRKHIQ    |
| Q8BZ09 | TLGRHGIFNMVYFGFYHNVKNIIPSSKDPTLEFLRKFVIGF     |
| Q2KI22 | WMLEVCEEQKCEEEVFLAMNYLDRFLSLEPVKKSRLQLLG      |
| Q1LZE0 | QPPSKDTEEMEAEGDSSAAEMNGEEEESEEEERSGSGTSEEEE   |
| P08057 | EERYDVEAKVTKNITEIADLNQKIFDLRGKFKRPTLRRVRI     |
| Q9D0U6 | LDSDFPGEDGSLWSFNFFYNKRLKRIVFFSCRSISGSTYT      |
| Q9BUT1 | GQAAALAFAREGAKVIATDINESKLQELEKYPGIQTRVLDV     |
| Q8K1A0 | RPHIAACMLYTIHNTYDDIENKAVADLGCQCGVLSIGAAML     |
| Q9D8T0 | DPATKMNEETRKLFSSELGSRNAKDLAFRDSWVFGAKGVQN     |
| Q61759 | TPTKWQIPNDLQCGFIKPLPNENCAKAYIHKVTDVMLCAGE     |
| Q6UX52 | ITCCAPQPPPPITYSLCGTKNIKVAKKVVKTHEPASFNLV      |
| Q3UG98 | MSYGVTKLGLTKFEAKIGQENEPSIRMFQKLHFKQVAMSNV     |
| Q8BVN0 | LKRLHCQMNKIQLNRRKWQWNIQQLEKTAELKKRIREKEA      |
| Q43688 | AAVSQSLTDLAKYMIGRLRPNFLAVCDPDWSRVNCSVYVQL     |
| P04156 | GWGQPHGGGWQGGGTHSQWNKPSKPKTNMKHMAGAAAAGA      |
| Q8K0Z7 | FFDKKGVVVVGVEDREKAVNLERALELATEAGAEDVKEAE      |
| Q9QXF8 | KERWNRKPEPSFDNWVIEEANWLTLDKDVLSGDGFDAVICL     |
| Q12918 | LIRDKAILFWIGLNFSLSEKNWKWINGSFLNSNDLEIRGDA     |
| Q9BYD2 | LKLPEEPI TRWGEYWC ETVNGLDTRVVRVMSVVNF EKPKTK  |
| Q3T0P5 | TASHVDADCFLCVFLSHGEGNHIYAYDAKIEIQTLTGLFKG     |
| Q68FF9 | GFALWLVGMVINIHS DHI LRNL RKPGETGYKIPRGG LFEYV |
| Q32LN0 | NVIVKTEQTDPSIMNTWKEENLYDTNYGSTVDL LDSKTFC     |
| Q8BFR6 | ALPLDHTLERWITKEECP LYNGGNVILEYLNDEEQFLKNVD    |
| P97447 | NTCVDCRKPISADAKEVHYKNRYWHDNCFRCAKCLHPLASE     |
| Q9Z2C6 | NNGVTKTWDRMLQDHCCGVNGPSDWQKYTSAFRVENNDAD      |
| P28663 | KLHMQLQSKHDSATS FVDAGNAYKKADPQEAINCLNAAIDI    |
| P15483 | SINTCIKILRPHNLPKLDINSEGQIEWGI RDGNLVAKNKT     |
| Q03084 | GNEYLYEDYALWLKSLANGCNGDNIQQVLVDMRFSKETAKR     |
| P0C0A3 | DELLAGNFTQEDEDAILEELNAITQE QMELPEVPSEPLPDR    |
| Q95452 | MHVAYYRHETTRKFRRGEKRNDFKDIEDIKKQKVRIEGSLW     |
| Q9NYP9 | CVSCNVSVDKEQKLSKREKENGCVLETLCACGCSNLG YVY     |
| Q8NCL8 | IPLLLMTPVFCLGNTSECFQNF S QSHKCILMHSPPSAMAEL   |
| P82923 | PLKHSDFFNKELFSVRS LFNARVHLGHKAGCRHRFMEFYI     |
| Q9D061 | VASREQLLYLYARFKQVKVGNCNTPKPNFFDFEGKQKWEAW     |
| Q53HI1 | VLIDCVGVLLIATLMWFISNKYL VKRQSRDYDVEWGYAFD     |
| Q9Y6Z7 | VGRMGPKGIK GELGDMGDQGNIGKTGPIGKKGDKGEKLLG     |
| Q2T9L9 | ADKQHVLDMLFSAFEKHQYYNLKD LVDITKQPVSYLKDILK    |
| Q645M6 | AGGAAPEDRDLRAAMEIICDNV GKDWRRLARHLGVSDVKIE    |
| Q9BS40 | EIPPTNYPASRAALVAQNYINYQQGT PHRVFEVQKVKQASM    |
| Q6IR41 | CQTHYSAFSVGRKTKLHSS ENFLSLLFDRVFNVDGHFDMA     |

|        |                                             |
|--------|---------------------------------------------|
| P10767 | GIGFHLQVLPDGRISGTHEENPYSLLEISTVERGVVSLFGV   |
| P00642 | ISITRPDGRVVNLEYNSGILNRLDRLTAANYGMPINSNLCI   |
| Q8BTG6 | DRNLLQVQDREQPIPWKVQFNLGNSSRPSNQCNRNSVQGKHL  |
| O43760 | LWTFLEWVGFCLTNQWAVTNPKDVLVGADSVRAAITFSFF    |
| P62827 | TLGVEVHPLVVFHTNRGPIKFNVDWTAGQEKFGGLRDGYIQ   |
| O35417 | GLSSSFNGKESELAGADRMNDEAAQGRTVHFNEEDLRKQA    |
| Q8BHC4 | PGYPAHRRIVEAFGTEVLENGDIDRKLVLGDLI FNQPDRRQ  |
| Q6Q6R3 | YGYLFGPKGGQSDPRHWTYENVWTTSLVVRHLDPSP IPSDL  |
| P20783 | KHWNSQCKTSQTYVRALTSENNKLVGWRWIRIDTSCVICALS  |
| Q3SX42 | TRTFAVSSKVTSMSTQTKVMNSQMKMAGAMSTTAKTMQAVN   |
| Q5VVY1 | PVFNSVELVDMMESFLLEAQNYLQVKGDVSESYHCYSLQEF   |
| Q9DCA7 | LISPLDVSQQLQPSFSDQVVINTQTEYQLTSADQPKKFADLE  |
| Q504P2 | KCKPCPKGSEWYKDCSYSQLNQYGTWQESVMACASARNASLL  |
| Q56K12 | SNNKTRIFNVQSRLTEAKHINWRAVLSNSCLYVEIPGGALP   |
| P22615 | LNISLPPWVSFDGFLNITGNDDYFAPVFTMAKQQEGDRV     |
| P41217 | LTVYVQPIVSLHYKFSEDLNITCSATARPAPMVFWKVP RS   |
| Q96S79 | PIIIVGNKRDLQRGRVIPRWNVSHLVRKTWKCGYVECSAKY   |
| Q80ZI2 | GTSRLDESSMLEENIEGLVDNLITSLREQCYDEDGGQYRIH   |
| Q9BTT0 | ESIFELLQQITYLDGFDQEDNEAPDSEEEDEDEDDEDEE     |
| Q96GY3 | SHMDRERLDEEAGKTPSDTHNKDCSIAATGKRPSARFPHQ R  |
| Q9TS87 | RGRLGFQVWLKNGVILSKLVNSLYPDGSKPVKVPENPPSMV   |
| Q2KHU0 | ASKLNI PSTNVFANRLKFYFNGEYAGFDETOPTAESGGK GK |
| P62593 | VLSRVDAGQEQLGRIHYSQNDLVEYSPVTEKHLTDGMTVR    |
| Q9BYJ0 | AKPTTRPTAKPTQPGPRPGNEEAKKKAWEHCWKPFQALCA    |
| Q9BWP8 | FVYSDHSPMRTFNKWRSGEPNNAYDEEDCEMVASGGWNDV    |
| Q8QZY4 | CHSVLGHVLRVAAPGSSHCLNVSISSPGARRRPRAWISNVV   |
| Q9D7G9 | GPYPGPAVRVPGPTRSYVSTNVFPPELPRPNSAPTDPVGPL   |
| Q3TQR0 | SPCPGYRLLCRINFSLNVVENLALLVLTYSSEDFTIHEN     |
| P81125 | GLFGGSSKIEEACEIYARAANMFKMAKNWSAAGSAFCQAAH   |
| Q8BHE1 | QTERHREERRRQQQLDAERLNDYVNADHGLYFNHRRSLEPP   |
| Q9R088 | KVIPMEYLHAIHRLYEEWLVNGSLFPAAAAPLVIEADHNLE   |
| Q14390 | TAHLSVVAEDGSAVSATSTINLYFGSKVRSVPSEILFNDEM   |
| Q99KR7 | KGSTFHRVIPAFMCQAGDFTNHNGTGGRS IYGSRFDPENFT  |
| Q9UQN3 | NSQMKMAGAMSTTAKTMQAVNKKMDPQKTLQTMQNFQKENM   |
| Q5E9S8 | IKHAIGHEHEVLLRDLLLEKNLSFLDEDQLRARGYDKTPDF   |
| Q9Y6G5 | ALQQQLENIHLRQDKAEAFVNTWSSMGQETVEKFRQRI LAP  |
| Q5JQC4 | GDQEAPVSQEGAQAEAAAGAGNQEGGDSGPDSSDVVPAAEVV  |
| O14653 | RTFTTNDSDTTIPMDES LQFNSSLQKVHNGMDDLILDGHNI  |
| Q8WVN6 | KGARDSHAGLYMWHLVGHQRNNRQVTLVSGAEPQ SAPDTG   |
| F2Z333 | APGCVLHAPAGRSLRASVLRNRSVLLQWRLAPAAAARRVRAF  |
| Q7Z7D3 | EQDEMFRGRTAVFADQVIVGNASLRLKVNQLTDAGTYKCYI   |

|        |                                            |
|--------|--------------------------------------------|
| Q9QYI7 | AGGGANVPHSSPFGAGYPFRNPEDIFREFFGGLDPPSFSEFW |
| Q496A3 | EKVPEKRDSGMTTEVERTYSANCSDFLESKGCFANTTPSGKS |
| Q17QN3 | DKHMNLILCDCDEFRRKIKPKNAKQPEREKRVLGLVLLRGE  |
| Q9NV23 | VKQCSPIIRADLNIVRSCTSNVPSKAVLSCDLTCFVGSEDI  |
| O60812 | MIASQVVDINLAAEPKVNRRGNAGVKRSAAEYMGSSFDLDYG |
| Q8VBT3 | DQLPRPSLVALPGPVVAPGANVSLRCAGRI PGMSFALYRVG |
| P52843 | TNLVKNPGSLGTYFEWFLKGNVLFGSWFHEHVRGWLMSREWD |
| Q2TUM3 | QAGVRYISIKPDNRKLANGTNVLGLLVDTLKGFHLVSTR    |
| B5MD39 | STINLYFGSKVCSVSGILFNNEWTTALPAFTNEFGAPPS    |
| Q92530 | LNLDYIDAHLGDFHRTYKNSEELRSRIVSGIITPIHEQW    |
| Q2KJF9 | SSSKKKKAKLEHGGSSGSKQNSDHSNGSFNLKALSGSSGYK  |
| P55253 | MGRGYAWLDTGTHQSLIEASNFATIEERQGLKVSCEPIEA   |
| Q9P0G3 | WGTISSPTARYPASLQCVNINISPDEVCKAYPRITITPGMV  |
| Q93LM8 | HLADGMTVGECAAITMSDNAAANLLLATVGGPAGLTAFL    |
| D3W0D1 | TQLQAHLLVIQNLDELEFIQNSLKPFGHWIGLYVTFQGNL   |
| Q9CQD7 | GKDACVVLVSESTKGRKSVNTFKACMKYKDCYSGFVSTTM   |
| Q3UTA9 | PEVLSKHLPLQYRWVWFFKNDRSRAWQDNLQLVTKFNTVE   |
| P22692 | ASQSRTHEDLYIIPINCDRNGNFHPKQCHPALDGQRKWCW   |
| P54349 | FQAMNAKLLMDPKRQIFLDQNMLAAIAELMQALNFDSETVP  |
| P32043 | ANSFYKQSPNIPAYNMQTCGNYGSASEVQASRYCYGGLDLS  |
| Q2T9Y6 | DSRAAGALLARASTLHLQTNLLNWGRLLKCCPSTHSEELR   |
| Q9CPV4 | SQSDPVLKVTLAVSDLQKSLNYWSNLLGMKIYEQDEEKQRA  |
| Q6QHK4 | LLEGAKDSKKQDPDEQSYSNSSSESHTSARSARLSRNITQHI |
| P06880 | DTYKEFERAYIPEGQRYSIQNAQA AFCSETIPAPTGKEEA  |
| Q4G0X4 | FTVREAPQIYLSSSSMEVFNANIFSTSCLFLKLLGSKLFY   |
| A2VDP0 | KTENDNDRLRPQPQASATSNTFRKSSDSSSSVSPVLVSSN   |
| P0DMR1 | DDSVEEGLLCCDDNEDQGDNQLLELIKDDEKGAEEDDRD    |
| Q96MI6 | ELQEDDVVVMATDGLWDVLSNEQVAWLVRSLPGNQEDPHR   |
| Q6DIA9 | DAHQNVIDKFSAVPDPQEWNNDIYLQVTHVFSGIRRGIRF   |
| Q91VR2 | VIALELLNSGYEFDEGSIIFNQFKSVISYKTEEKPIFSLNT  |
| O95926 | ARKLNHQEVVEEDKRLKLPANWEAKKARLEWELKEEEKKE   |
| Q9D5K1 | LFRPFRANSPFIFGFKPAYEYNAGTYRCDVQLLKNLKFVKRL |
| Q3T0S3 | SPYVRKNGTFPPYCCYDSVNNFMPCNFTAHNMSVQGCF     |
| P07766 | KAKAKPVTRGAGAGGRQGRQNKERPPVPNPDYEP IRKGQR  |
| Q8WUE5 | FVPYKGDLEVEYSTEPGISNIKATSVKPIRCIHTEEVCIT   |
| Q8TAX0 | NYSFLQAVNGLPTVPSDHLNPLYGFSALHAVHLHQWTLGYP  |
| P58418 | SEKYTTSFWWIFFCFVHFLNGLLIRLAGFQFFAKSKDAE    |
| Q8K305 | QGEGFSQVLKMRPVIQLQRINQEVFSSLYRKADFKPDTCVT  |
| Q9KIP8 | KYLLQDAQANGYAVPAFNTHNAETIQAILVCEMRSVPVIL   |
| Q9ULC0 | DVRKNSIISNVTVTSVTLPNVAVSTLQSSKPKTETQSSIKT  |
| P56177 | SKFKKLMKQGGAALEGSALANGRALSAGSPVPVPGWNPSS   |

|        |                                             |
|--------|---------------------------------------------|
| Q149M0 | QLSLTFSFFWLGLSWNSSGRNWLWEDGSFPPPTLFSDEKELA  |
| P47754 | TVSNEVQTAKEFIKIVEAAENEYQTAISENYQTMSTDTTFKA  |
| Q3ZCC4 | PSTQTSEAGSTGEEQKEEESNGFNKDLLDSPHNAGAASTVN   |
| H3BS89 | RDRCKAFNTRRVDPGFYNNNNNLPLRASRSRLDRWEGKLL    |
| Q8BXK9 | RKPADLHNLAPGTHPPFLTNGDVKTVDVNKIEEFLEETLTP   |
| Q9D6S7 | IISLEEVDEDMKSVVEALKDNFNKTLNIRTAPGSLDHI TVV  |
| Q9BY71 | GLQEVPE DIPANTVLLKLDANKISHLPDGAQHLHRLRELD   |
| Q8WY41 | RVLCPVLRRYTCPLCGASGDNAHTIKYCFLSKVPPPPARPP   |
| Q8CFI2 | PIDYPYSPPAFRFLTKMWHPN IYETGDVCISILHPPVDDPQ  |
| Q9ERB0 | ELDSVPKEPSSTVNTEVYFKNSTLRTYHQKIDSNLELDSVG   |
| P14649 | VGDGKILYSQCGDVMRALGQNPTNAEVLKVLGNPKSDELKS   |
| P51749 | IEDERNLHEDFVFMKTIQRCKNKGESLSLLNCEEIRSRFED   |
| Q4PNJ2 | ICFYLEAGDLSKETDLIILTFNISMHRSWWMENGP GCMVTSV |
| Q9NRY7 | LRITDNVGREVITLERPLRCNCCCCPCCLQEIEIQAPPGVP   |
| Q9XSK7 | KFGKPNKRKGFSEGLWEIENNP TVKASGYQSSQKKSVEEP   |
| Q8NE22 | SMYPGTVYQKYEPIFFQSIGNFFIFRCLDGV LIDGNDKGIS  |
| P50195 | IDPFGALFEAPGFSSEHEWRNSELARQQQKTIQNHVGT FHQ  |
| P32007 | KQIFLGGVDKRTQFWRYFAGNLASGGAAGATSLCFVYPLDF   |
| Q5ND56 | CRTKSQKLTRTTIIRNFLIENRLM/THHTVILLFLVPISQK   |
| A8MUZ8 | KCYECDKSGKAFSQSSGFRGNKIHTGEKPHACLLCGKAFS    |
| P01241 | LCFSESIPTPSNREETQQKSNLELLRISLLLIQSWLEPVQF   |
| O43633 | KIMMEFERQAEIMDKKEEMMND AIDDAMGDEEDEESDAVV   |
| Q8N954 | KLEGDLRRSQRACQQLDVQKNIQVPREAWYWRLEETEED     |
| Q8BFZ6 | EEMCIVIDKQDQIIGADTKKNCHLMENINKGLLHRAFSVVL   |
| Q9JKL5 | HRRFKQLSGDQPTIRKENFNVPDLELNP IRSKIVRAFFDN   |
| Q9CQE1 | HVELGYSTLVGVFHTHEYGALNRVHVLWVNESADSRAAGRHW  |
| O08859 | KPGPNCGFGKTGIIDYGI RLNRSERWDAYCYNPHAKECGGV  |
| P50195 | LDELVSPKHSRFKDYCAYFVNIIPRKPTRYNSPFTPSNKG S  |
| O88456 | HLYSMIIRRYADESGNMDFDNFISCLVRLDAMFRAFKSLDK   |
| Q9BVK8 | YDFIGEFMKASVDVADLIGLNLVMSRNAGKGEYKIMVAALG   |
| Q8QZY6 | IKSYRDDIDLQNLIDSLQKANQCCGAYGPEDWDLNVYFNCS   |
| Q61096 | TPRVLQELNVTVVVTFLCREHNVCTLVPRRAAGICFGDSGGP  |
| P01904 | AVDKANLDVMKERSNNTPDANVAPEVTVLSRSPVNLGEPNI   |
| Q08E43 | DEACVEVLLEYGANPNALDGNRDTPLHWA AFKNNAEVRLAL  |
| Q8TF63 | KHLVCSFRLYPFTVHTVSPGNSHLALYQVFKAVKLCPSETS   |
| P24158 | AAHCLRDIPQRLVNVVLGAHNVRTQEPTQQHFSVAQVFLNN   |
| Q9BU64 | AAKYLQTNIQHFLFSLCEYLNAYSGRKYQADRLQSDFAALL   |
| Q9UBS3 | EQSFNFNFDLFDKDFGFFGQNQNTGSKKR FENHFQTRQDGG  |
| P53004 | LSFHFKSGSLENVPNVGVNKNIFLKDQNI FVQKLLGQFSEK  |
| Q56JZ1 | AGIHKKVARTIGISVDP RRRNKCTESLQANVQRLKEYRSKL  |
| P0C7M8 | EDWLLYGRKCYFFSEEP RDWNTGRQYCHTHEAVLAVIQSQK  |

|        |                                            |
|--------|--------------------------------------------|
| Q9JL95 | SQHQDIFEDEEAMESDPDALNKDSACPKBEDTTHFGGTPGC  |
| P21845 | GGHEASESKWPQVSLRFKLNWIHFCCGSLIHPQWVLTAA    |
| Q6UWD8 | TLEARATAPPAPSPNSAFSNLGPQTVLEVPARSTFWGFQP   |
| P61018 | GTGKSCLLHQFIENKFKQDSNHTIGVEFGSRVVNVGGKTVK  |
| P54116 | TISVDGVVYVRVQATLAVANITNADSATRLLAQTTLRNAL   |
| P20826 | ESPKRPETRSFTPEEFFSIFNRSIDAFKDFMVASDTSDCVL  |
| Q96D70 | VRNSDLVPKAKGRKSLQRLENTQYLLTLETDGGLPGLLEDG  |
| Q8BG50 | PVVVLSFVVSFYGTITWYNIFLVYNEERTFWHKISCCPC    |
| Q9H7E9 | PLGDEGGTASKKQKNKKTRNRASVANGGEKASEKLAPEEV   |
| Q3T160 | LFGCELKADRDYHFKVDNENEHQLSLRTVSLGAGAKDELH   |
| O88452 | FENNSCEIQGLHGICMTFLHNAGKFDAGKGSFIKDALRCKA  |
| Q9H444 | QEELDKNLEISGPETVPLPNVPSIALSPKPAKKEEEDDD    |
| Q3T0X7 | KHCYKVHDCNATVEKLEDFINTINSVLESLEYIEIKKGVTE  |
| P06717 | SGYSTYYIYVIATAPNMFVNDVLGVSPPHYEQEVSALGG    |
| Q9NQF3 | AKAWGSLQPPVLC LHGWLDNASSFDRLIPLLPQDFYVAM   |
| Q9DC16 | PTVYEDKSGKQRYSYQYTVANKEYVAYSHTGRIIPAIWFRY  |
| P01375 | NPQAEQQLQWLNRRANALLANGVELRDNLVVPSEGLYLIY   |
| Q8WY22 | SYRRVTNFSQSVSSLFGEDNVRAAQKFLARLTERFVLGVD   |
| O15347 | NPGISIGDVAKKLGEMWNNLNDSEKQPYITKAAKLEKEYEK  |
| Q1RMX6 | NNRTSHFIEEKLQAQEKESINPPKKGKSNESISLLCHNQDV  |
| P79099 | LHEITPPAIRGDLAVNALNNNSTAGQAVTVELFLTLQLVLC  |
| A7E2S9 | FKCVHQQLLEYKQKISKNSQNSNPEGTSEGTPEAAPLAER   |
| Q8K201 | SSAAPTPTAAPSAPPEEADSNEEDPSMEEEDLLALNSSPATG |
| Q9D7B7 | MVLCTVMLFLLQLKFLKPRTNFSYSEVKDAKGRTVSLEKF   |
| Q3SZW6 | NTAAASAPEMIQHSLWRPVRNKEGLKTGYASKTRCKSLKIF  |
| P35279 | GEQSVGKTSLITRFMYDSFDNTYQATIGIDFLSKTMYLEDR  |
| P59190 | LLIGDSGVGKTCLLCRFTDNEFHSSHISTIGVDFKMKTIE   |
| Q6ZVK1 | CACYFLAFLFSFVVVPLSENGHDFRGRCLLFTEGMWLSAN   |
| Q9D853 | SPSAIKLSASILEKEGLSNINLKVEDFLNPSTKLSGFHVCV  |
| Q96GR4 | TTTWEFISSHRIAYLRQRFSPNPFDRGLTRNLAHFFCGWPSG |
| Q53HL2 | VIQVDEMIVEEEEEENERKNLQTARVKRCPSPSKKRTQSIQ  |
| Q8N8Z3 | ALVSPTPPKLSPGQLSPHSVNVHWGPQGHHLPRSGTTVLH   |
| Q5VXU1 | ICFYLEAGDLSKETDLILTFNISMHRSWWMENGPCTVTSV   |
| O88456 | FVQLAGDDMEVSATELMNINLKVTRHPDLKTDGFGIDTCR   |
| P43528 | ERGTPININLYDHARGTATGNTRYNDGVSTTTTLRQAHL    |
| Q9NSE7 | ATHGLDSKQSPVLCPPFSNPNGRISPLARAGSSSVSRGGSP  |
| P07992 | KLEQDFVSRVTECLTTVKSVNKTDQSOTLLTTFGSLEQLIAA |
| Q13145 | VSGHENCLTCDKMRQADLSNDKILSLVHWGMYSGHGKLEF   |
| Q3ZC52 | FRIKDPVLFVSGSADEMCEKNLLEKVAQKMQAPHKIHWIEK  |
| Q9ULN7 | QAQDSGEVTGQAGSLLGAARNPRRGRRRNRNRRLTQK      |
| P40293 | PPVMYRGDVGAGGELI IKPVNKTHRGMYRCQVSDGKKIQRS |

|        |                                              |
|--------|----------------------------------------------|
| P01731 | NSSKLF SAMRDTNNKYVLTNLKFSKENEGYFCSVISNSVM    |
| A5D7N9 | SSCRRPLGDSL SWVASQEDTNCILLRCVTCNVSVNEEQILS   |
| Q3T0S6 | AYHKYKAKRNCWPRV RGVAMNPFVEHPFGGGNHQHIGKPSTI  |
| P02741 | YTVGAEASI ILLGQE QDSFGGNFEGSQSLVGDIGNVMWDFV  |
| A5D7U1 | LSVTTKKSSLIHISPD IYKSNTLYTVSTQVSHGII SVVLEA  |
| Q6PDM2 | PSYGRSRSRSRSRSR SRSRSNRSRSYSRRSRGSPRYSPR     |
| Q8TAT2 | ERASGPAAGT PPPQS APPKENPSEKRTNEGKRKAALVPNEE  |
| H3BNL1 | QHLIHFVQVQPSHTR TTYQQNFCCPSQGGHYGSYKVGQPAP   |
| P47878 | PRPAEQYPLRALLNG RGF CANASAAGSLSTYLPSQPAPGNI  |
| Q6FIF0 | GNPRTNGMCSVCYKE HLRQNSSNGRISPPATSVSSLSSESL   |
| P09630 | SYFTNP SLSCHLAGGQ DVLPNVALNSTAYDVRHFSTYGAA   |
| Q58DH1 | SWAAEDQTSKAEKDVR PKLKNRHRAPFLSEKSTRQAPRGTN   |
| P35243 | QKLEWAFSLYD VDGNGTISKNEVLEIVMAIFKMITPEDVKL   |
| Q9WV93 | PWGSAFGHHPHIAHP LLLPQNGHGNAGTAASPTPEPHHQRL   |
| Q5BIS9 | VYLSGSFNNWSKLP LTRSHNNFVAIDLPEGEHQYKFFVDG    |
| Q9NQX7 | TQMELEEDVKIYLDEN YERINVPVQFGGGDPADI IHDFQR   |
| P63046 | RSLRTMSYRGTFQEF CRRFMNDKLYGGSWFHEHVQEFWEHRM  |
| Q9QY36 | KEKGKHMVLAALEN KAENKGNVLLSSGEACREEKGLAAEDS   |
| P56857 | SGILFII SGCIAIIGV SVFANMLVTNFMWSTANMYSGMGGM  |
| Q3T0M7 | TKFEECRKEIEEKEK KSGKNDSTEKVVLEALSVEGEQ       |
| Q96HJ5 | IASATIALVGTAF LSLNIAVNIQSLRSCHSSSESPDLCNYM   |
| Q9WVF9 | GLHRESSEHPWKWTN NTEYNNMNPILGVGRYAYLSSDRISS   |
| Q8VHX2 | SDKYPIQDTGLPKA KECDTVNSNCPNSDDQPQGEENDFPD    |
| Q5E9A1 | SQQAQLAAA EKFKVQGEAVSNIQENTQTPTVQEESEEEEEVD  |
| Q99766 | RLCKCHYIEDDCLL RLSQLENLQKTILEMEIISCGNITDKG   |
| Q5JQC4 | LDMVHSLHLRLSHND HIL IENRQLSRLMVGPHAAARNLWGN  |
| O08807 | HTRLGLFI IDDKGVL RQITLNDLPVGRSVDETLRLVQAFQY  |
| P58771 | EKLELAEKKATDAEAD VASLNRRIQLVEEELDRAQERLATA   |
| P53808 | SLAIESDGKKGSRV FMYFDNPGGQIPSWLINWAAKNGVPN    |
| Q15347 | RPPSGFFLFCSEFR PKIKSTNPGISIGDVAKKLGEMWNNLN   |
| Q13670 | GCLTKCSHAFHLLCL LAMYCNGKNGPEHPNPGKPF TARGFP  |
| P36980 | THLEGDTVQI ICNTGY RLQNNENNISCVERGWSTPPKCRST  |
| Q9NP55 | TMAQFGGLPVPLDQ TLPLNVNPA LPSPTGLAGSLTNALS    |
| Q5SVS4 | CGLAGALASNPVDV VRTRMMNQRVLRDGRCSGYGTLDCLL    |
| Q6UWD8 | PTQVGTLEARATAP PAPSAPSAPSNLGPQTVLEVPARSTF    |
| Q8N413 | CMVSSIRQEGLVFFR GVTINSARAFPVNAVTFLSYEYLLR    |
| Q8N1A0 | QWHHLQVEIESLHA VERGLENSLHASEQHYQMQLDLETVI    |
| Q91W61 | SLSLAVNANVGD TAVQELARNCPQLEHLDLTGCLRVGSDGV   |
| P97371 | QLNLVTTWLQIQI PRIEDGNNFGVAVQEKV FELMTNLHTKL  |
| O54830 | FPILILSRMQAWNET LKNRINLSEGT PGIDDDILPIYKNIE  |
| O15260 | I IALQTTIAYSILWDL KFLMRNLALGGLLLLLAE SRSEKGS |

|        |                                              |
|--------|----------------------------------------------|
| POC7M4 | IWFENRRAKWRRHQRALMARNMLPFMAVGQPVMVTAEEAIT    |
| Q13491 | PVFMFYNIWSTCEVIKSPQTNGTTGVEQICVDIRQYGIIPW    |
| P62955 | GLSLVVGLVLYISSINDEVMNRPSSEQYFHYRYGWSFAFA     |
| Q6ZRC1 | HHLDVKSEMATAALRAQTYLLNPEMDSVLQSSLSSESUPIPE   |
| Q14AM7 | SVDTHQRSFDIGIQIGYQRRNKDVLAWVKRRRTIRREDLI     |
| Q8BFU0 | YGECLHSCPSGYYGHRAPDMNRCARCRIENCDCSFKDFCT     |
| P08579 | NSANTQGNSTPNQVPDYPPNYILFLNNLPEETNEMMLMML     |
| Q6ZSR6 | PPRLAPLLIFNPHPSTVLSNCNEYNSFFEFCDLSLQIVIPE    |
| Q32KW0 | ISFITSEASERCHQEKRKTINGEDILFAMSTLGFDSYVEPL    |
| Q5JUQ0 | WELPDLQEGKIQAISDSGYNYPWYGNTTETCTIVGPTKRD     |
| O14618 | GNSGERLACGI IARSAGLFQNFQKQICSCDGLTIWEERGRPI  |
| Q9H2P9 | EFYGRKLVVADREEVEQEADNILKDADISDVAFLVVGDFFG    |
| P51163 | KDRWNAKSVYVVGSAATASLVNKIIGLDAEGAGSGNAEKLAEY  |
| Q96EF9 | LISLHPFNPNWGWGLAEAYLNLGPALSAALASSQKQHSFTS    |
| Q6P1N9 | QDVI GRAVEIGVKKFMITGGNLQDSKDALHLAQTNGMFFST   |
| B5L3F2 | NKLEMQISMMMLKNNISFMYGNYEIIINNNSIVGKFFVAPQKIT |
| Q0II87 | QEARDGTSQVKLKAINENWKNLSNSQKQVYIQLAKDDKIRY    |
| Q30134 | SDVGEYRAVTELRPSAEYWNQKDFLEDRRALVDTYCRHN      |
| E1ANH6 | AFARSLGDETFRLDRTEPTLNTAIPGDRDRTTTLAMAQTL     |
| P07766 | RGSKPEDANFYLYLRARVCENCMEMDVMVSVATIVIVDICIT   |
| O60682 | AHLRQLLQEDRYENGYVHPVNLTPFVVSGRPDSDTKEVSA     |
| Q2KIH8 | KITRFGMASCPQVPMAEHISNLPWPWTRTGSTRICQEAPD     |
| Q3SZD1 | GMDEGDGEGTILPIMQSIMQNLLSRDVLVPSLKEITEKYPE    |
| Q9HC57 | CQAARCQADSECPRHRRCCYNGCAYACLEAVPPPPVLDLWLV   |
| Q1RMX9 | NKDQWYNVLEFSRTVHADLSNYDEDEGAWPVLLEDFVEWHKV   |
| Q3T0E2 | FIKSMEDLEKNHENLLTGAQNELKKEMALLQKKIMMETVSC    |
| P52743 | FLVEKHTLHVIIDFILSKVSNQQSNLAHQRVYTGKPYKC      |
| P01910 | ATGKHNLIELTKRNSPATNEAPQATVFPKSPVLLGQPNT      |
| Q92882 | LYWACHGGHKDIVEMLFTQPNIELNQKNLGD TALHAAAWK    |
| P31946 | THPIRLGLALNFSVFYIEILNSPEKACSLAKTAFDEATAEL    |
| Q8CI43 | RDQGTIEDYLEGLRVFDKEGNGKVMGAELRHVLTTLGKMT     |
| Q9Z0S5 | GTLHILAGACGMVAISWYAVNITDFFNPLYAGTKYELGPA     |
| Q4VC05 | NKNKKKGKDEKCGSEVTTPENSSSPGMMMDHDDNSNQSSIA    |
| Q969J5 | RFTPWWETKIDPPVMNITQVNGSLLVILHAPNLPYRYQKEK    |
| Q6QD59 | EEFKSMSGTIQLGRKLITKYNRRELTDKLLIFLALALFLAT    |
| Q00169 | YHLQSKVPTFVRMLAPEGALNIHEKAWNAYPYCRTVITNEY    |
| Q9D1Z3 | HGSAKFYISDLWKVTFQYNSNVVIFGVPMMPQLEKKLELE     |
| Q91ZT8 | LLSHGAQVNGMTIDWRTPLFNACVSGSDCVNLLLQHGATP     |
| Q15286 | YRGTHGVI VVYDVVTSAESFVNVRWLHEINQNCDDVCRILV   |
| P35288 | KIGVFNASVSHLQNSSSLGGDVINLRPNKQRTKRTRNP       |
| Q3ZBE1 | NPPVVHSALLALRYLAECRANREKMKGELGMMLSLQNVIQK    |

|        |                                             |
|--------|---------------------------------------------|
| Q148G4 | FMITGGNLQDSKDALHLAQTNDMFFSTVGCHPTRCDEFKKN   |
| O88822 | LFLLELRGYSKLYDDIGDFPNGWIHLMSVSVSFLFFTDMLI   |
| A6NMN3 | SSFEMASNTDMRWDLACKSNCSPEPEDIDLLECCQLQELRE   |
| Q58DW5 | RYLIEEDEDAYKKQFSQYIKNNVTPDMMEEYKKAHAAIRE    |
| P42574 | VDAANLRETFRNLYEVRNKNDLTREEIVELMRDVSKEHDS    |
| P68401 | KNGELENIKPKVIVVWVGTTNNHENTAEVAGGIEAIVQLIN   |
| P22794 | ENTSKSHGEIFKKDVCANNNMAMLIICLIIIAVLFLICTF    |
| Q3SYV5 | DFGQKEFSCCGGISYKDWLSLNFNCSEDNPSRERCSVPYS    |
| Q9D753 | ACTFALLAALKNVQLPEVTINEETALAEVNLKKSXYLNVRT   |
| Q9Y2Y8 | LTEEVQAEEGEEVKASACQDNFEDEEAMESDPAALDKDFQC   |
| Q8R2N1 | GFNGTAGIFATYPSGHLDMVNGFFDQFIGTAALIVCVLAIV   |
| Q9DBZ5 | FNPAFFQTTVTAQILLKALTNLPHDFTLCKCMIDQAHQEE    |
| Q14749 | LDKDVPQSAEGGFDAVICLGNSFAHLPCDKGDQSEHRLALK   |
| Q7SIB2 | SCLEEFRSAPFIECHGRGTCNYYANAYSFWLATIERSEMFK   |
| Q9UNI1 | MTAAHCVDYQKTFRVVGADHNLSONDGTQYVSVQKIVVHP    |
| P33792 | FSDSMIKFSGEDDFFLVNGNSKEREYIYVTLSELISEKNN    |
| Q7Z2X4 | YCTADHNVSPNIFAWVYREINDLSYQMDCHAVECESKLEA    |
| P06836 | TRKKLKGEEKGDAPAAEAANEKDEAAVAEGTEKKEGEGST    |
| Q8C8M1 | CNACVLLVWRWKKLPAGSKKNWNHVVDARAGPSLKTTLKPK   |
| Q3UFY7 | GGDRLQVISDFDMLSRFAYNGQRCPSHHNILDNSKIISED    |
| Q66JS6 | EALVRDVCISLEIDDLKKITNSLTVLCSEKQKQEKQSKAKK   |
| P30115 | DIALVELLYHVEELDPOGVVDNFPLLKALRSRVSNLPTVKKF  |
| Q5TGJ6 | FLSPKRLFPYKECKEKFVKPNKRRGFSAGLWEIENNPVQA    |
| A6NFK2 | ANDHKPLPIIDFGKIIITYTNNLKIIRTPMDKRDVFRKILQK  |
| Q9UKR0 | LPNDCATAGTECHVSGWGITNHPNPFDPDLQCLNLSIVSH    |
| P20615 | IISHESDAPPAKFPSPGQYANPRQPGHAEHLDFPSCSPQPK   |
| Q8BH95 | KFLSHWDHITRVKKPVIAAVNGYALGGGCELAMMCDIIYAG   |
| Q62361 | DLGEVGAWRPHKRQHPGRRANQDKDSWSDEGSDWLPSSWL    |
| Q9BPW8 | NIYELRTYKLPGTMIWGNWARAIKYRQENQEAUVGGFFS     |
| Q9D1N2 | QPGSGWAQEDGDADPEPENYNYYDDDDDEEEETNMIPGSR    |
| P35278 | SLAPMYRGAQAAIVVYDITNTDTFARAKNWKELQRQASP     |
| P26452 | QMKEEDVLKFLAAGTHLGGTNLDFQMEQYIYKRKSDGIYII   |
| Q9H1U9 | LRGPIKEHLPTATTHSAHLVNDVICGGLLGAMLGFLFFPIN   |
| Q9NRY7 | VGRISKHWSGFLREAFDADNFGIQFPRDLVVKMAVMIGA     |
| Q8N699 | YTHGLNRTGFYRHSGCERRNSLSASLTFQRQASLEQANSF    |
| Q91X91 | AKSPGVLAGRPFDDAIFTQLNCQVSWFLPEGSKLVPVVKVA   |
| Q99727 | HLCNYIEPWEDLSLVQRESLNHHYHLNCGCQITTCYTVPCT   |
| P05820 | NMCLQALTQLEDYIKKHGASNPLTLQIISTNIGYFCNADRN   |
| Q3ZBH3 | IITAGALAYIYYQQLNAELKENLKDITMTRRYHQPGHEGVTSA |
| Q32L08 | EASLKRCCNLTDGVLALALNCRLLKIIDLGGCLGITDVSL    |
| P14435 | TWLRNSKSVTDGVYETSFVLRNDRHSFHKLSYLTFFPSDDDI  |



|        |                                              |
|--------|----------------------------------------------|
| Q91X52 | ALDMLTKMMALELGPBKIRVNAVNPVTVMTPMGRTNWSDPH    |
| P30404 | ENFKLKHEGPGVLSMANAGPNTNGSQFFICTIKTDWLDGKH    |
| O95999 | ASTVMYHPEGESSTTPFFSTNSSLNLPVLEVGRTEINTIFSS   |
| Q99N07 | TLWWKQSSSAFSGNVI FLSQNSKNKSSVSSESLCNPTYENI   |
| Q2YDH9 | SKVQQFSEKAFLLQLLKTTHENALERQCNEITNQRMMLLQTF   |
| A6NFD8 | AELLAEFANYFHYGYHECMKNLVHYLTVERMETKDKTYAR     |
| O55242 | YPGETVVHGPGEATALEWGPNTWMVEYGRGVI PSTLFFALA   |
| P48060 | GGNYPTWPYKRGATCSACFNNDKCLDNLCVNRQRDQVKRY     |
| Q92915 | IYSSMLYRQQESGRAWFLGLNKEGQAMKGNRVKTKPAAHF     |
| P50195 | ILGHVEGWDRMGIGGIVDLLNEERRIIAEVKNKYSTVTGGD    |
| A6QLK6 | DELA FNKGD TLKILNMEDDQNWYKAELRGAEGFVPKNY IRL |
| Q2TAA2 | FSGYNTRWAKIILPRLIRKGNSLDIPVAVTIFFGANDSALK    |
| O02756 | DKAKRRNQEMQQLVELSAENEKLQQRVEQLTRDLAGLRRF     |
| Q0V882 | GFAFLTGVGLGPALDLCIAINPSILPTAFMGTAMIFTCFTL    |
| P98173 | NGVSGELI EARAFDMWAGDVNDLLKFIRPLHEGLTVFVASY   |
| P10279 | RENMHRYPNQVYRVPDQYSNQNNFVHDCVNI TVKEHTVTT    |
| Q9Y2Y6 | LDARTTALLSVSHLVLVTRNACHLTGGLDWIDQSLSAEEE     |
| Q8WWF3 | MKKPKQNQLTPVTNSEVALVNAYPEQRRARRQSQFNEVNQN    |
| Q9D8Y0 | QVLARLSEIDVSTEGVKGAKNFFKAVQAINVSSRFEEEEIK    |
| P27701 | LMNRPEVTYPCSEVKGEEDNSLSVRKGFCEAPGNRTQSGN     |
| P97478 | KEGAMACTVAVEESIANHYNNQIRMLMEEDPEKYEELLQVI    |
| P00848 | PKGRTWTLMIVSLIMFIGSTNLLGLLPHTFTPTTQLSMNLS    |
| Q3T123 | RLETAERFQKHLERVIEMIQNCLASLPDDLPHSEAGMRVKT    |
| Q8TBF4 | RAINNKQLFGRVIKASIAIDNGRAAEFIRRRNYFDKSKCYE    |
| Q8NGA4 | IGTCAHLIRAKLLREGVWHANRPKRLLLVLVSALSAGSHLT    |
| P47741 | LAPLTVLLALYLLRKAWRLPNTPKPCWGNSTFTPIQEEHTD    |
| Q3TBL6 | DDTSSEIFDELYKVTEIHTHNKKEAHKIMKDAIKVAIKIGI    |
| P00846 | AMAIPLWAGTVIMGFRSRIKNALAHFLPQGTPTPLI PMLVI   |
| P35452 | PYTKQQIAELENEFLVNEFINRQKRKELSNRLNLS DQQVKI   |
| Q96L21 | CGRDGFHMRVRLHPFHVIRINKMMLSCAGADRLQTGMRGAFG   |
| Q9Y6N3 | KCTFIPKRSQTAKESIVFMQNLDVTEFCTEKTHNKEAPNL     |
| Q9D9J8 | GWLIGGMNFQQQEISINITNVQLDCGGIQMAFPKEWFSAN     |
| Q8CC84 | SSEESHQVVLPRGKEHQKNSSQRPGAGTMVLLQRELAQE      |
| O15305 | IGRSCSQEERIEFYELDKKENIRQKFVADLRKEFAGKGLTF    |
| Q9ULZ2 | VDKLDIVDLTCLTEQNSTEKNAKFTLVLPKEEVQLKTENT     |
| Q9DC16 | NELYVDDPKDSSGGKIDVSLNISLPNLHCELVGLDIQDEMG    |
| Q9QXT8 | I LREDAPLEHVERFFQKMDRNQDGVVTTIDEFLETQKDENI   |
| Q8C5C9 | MLDGPQEELTPLNNDLRIQPNSAEDPSPAQVGKESPWSPCN    |
| Q8IUK8 | GYPVISAFAQDQDVTREASNGVLLLMEREDKVHLKLERGN     |
| Q8N816 | QLSAEADACPSVLYSEVLEWNKNINTYTSFHD FCLILGIFL   |
| Q8BNX1 | GYRWVDGASLNF SHWNSGEPNDSRGHEDCIMMLHSGLWDA    |

|        |                                             |
|--------|---------------------------------------------|
| Q16890 | RQVLSAKERHLVEIKQKLGMLNMLNELKQNFSSKSWHDMQTTT |
| Q9CQ88 | QFGISCSCLAINRNTQADVINASWSVLSNSTRHELERSFDC   |
| Q9JK37 | LGKKISVPRDVMLEELSLLTNRGSKMFKLRQMRVEKFIYEN   |
| Q58CQ0 | PAWGLEQRPRGPEKPGVDATNAKL PANQPSLMHKVDEHEQD  |
| Q8WTT0 | AVVSILLLSVCFTVSSVVPFNFMYSKTVKRLSKLREYQQYH   |
| P22994 | VVVAGHLQGELQKHVLDGFQNDFRHSVRLGGQLRQVHHARH   |
| Q08091 | QRGMTVYGLPRQVYDPKYCLNPEYPELSEPTHHHPHNYYN    |
| P47758 | QDIAMAKSAKLIQQLEKELENTLRVTRSAAPSTLDSSTAP    |
| Q96S44 | LIHGDLTTSNMLLKPPLEQLNIVLIDFGLSFI SALPEDKGV  |
| Q8R4E4 | QDYSSGSRSHPTPIPRDYRNFNKTVPVFGGPHVREAI FHAGT |
| Q9H8W4 | TPTKSAVYAATATEKSEWMNHINKCVTDLLSKSGKTPSNE    |
| P62827 | KVDIKDRKVKAKSIVFHRKKNLQYYDISAKSNYNFEKPFLLW  |
| P09936 | MKQTTIGNSCGTIGLIHAVANNQDKLGFEDGSLVKQFLSETE  |
| Q3TUU5 | LASHLASHGFFCLRFTCKGLNIVHRIKAYKAVLNLYLKTSGE  |
| Q14543 | YYIYSGGEKIPLVLSRPLSSNVATLQHLCRKTVNGHLDSEY   |
| A8MVS1 | LLTHSRKKPYVSKQCGKSLRNLSPKPKRQIHTKGKSYQCN    |
| Q9KIP8 | ISTKYLLQDAQANGYAVPAFNHNAETIQAI LEVCSEMRSP   |
| P12961 | VMEQLGIARPRVEYPAHQAMNLVGPQSI EGGAEGLQHLGP   |
| Q14512 | QIKQSRPGNKGFVTKDQANCRWAATEQEEGISLKVECTQ     |
| Q3ZBY3 | LNGDGKLGLEMSRLLPVQENFLLKFQGMKLTSEEFNAIFT    |
| P01138 | KTTATDIKGEVMVLGEVNIINNSVFKQYFFETKCRDPNPVD   |
| Q810N6 | LFSSQQEYEESEQEAETGAENPLLQPTLTGDVEGLQKIFED   |
| Q99LP6 | SFRPSRLLCTATKQKNNGQNLDEDLGHCEPKTDPPSADKT    |
| Q2NL33 | SAYEYAQINESKGCAYFQNGNIYISRCSAEISWICEKTAAL   |
| P63013 | YSAMATYSATCANNSPAQGINMANSIANLRLKAKEYSLQRN   |
| Q9UBW8 | IHQVLEAPGVYVFGELLDMPNVRELAESDFASTFRLLTVFA   |
| P04768 | IQPCSWILLLLNVNSLLWKNVASFPMCAMRNGRCFMSFED    |
| P50295 | LYWALTKLGFETTMLGGYVFNTPANKYSSGMHLLVQVTIS    |
| Q61500 | PHTYVVREDLVAVEEIRDVSNLGI F IYQLCNRKSFRLRRR  |
| Q6ZTC4 | NPHPQLQLRGKRAAGLLLRNFWCHPQAPGGSSTWAPSLPP    |
| Q495C1 | VCPHWLLLLAFSSGRHGELTNSKTLPIYAEVQRAVLFPFQQ   |
| P52823 | ECDEDTVSTIRDSLMEKIGPNMASLFHILQTDHCAQTHFRA   |
| Q9Y2B4 | KRCWHSLLSVPKILRISSEGENSACNKTQNNEEFQEIGCSE   |
| Q9Y320 | VFLMTCKPPLYMGPEYIKYFNDKTI DEELERDKRVTWIVEF  |
| Q9NRY7 | QNQPGRPEGVWMPAPPPPLNCPPGLEYSQIDMILIHQQI     |
| Q9JKT4 | AAEGILLSIATVEAGLGLVGNFIALVNCMDWAKNNKLSMT    |
| Q9Y365 | RLTVNADVGYYSWRCPKPLKNRDVITLRSWLPMGADYIIMN   |
| Q9H3R5 | KLLEIQTEKNKQKIDLDSMENSERIKIIRQNLQMEIKITTV   |
| Q96S21 | IDKLPPLVTIKSHLKSFSMANGMNAVMMHGRSYSLSAGAGG   |
| O14990 | LNIKLARQLMWKELQSEDNENEETPQGTNEEKTAEESEEA    |
| Q9WUK2 | RRAGPPMGSFRFDGPPLRGSNMDFREPTEEERAQRPRLQLK   |

|        |                                            |
|--------|--------------------------------------------|
| P52803 | SCMKTIGVHDRVFDVNDKVENSLPADDTVHESAEPSRGEN   |
| Q3ZC48 | PYISDTGTVAPEKCLFGAMLNIAAVLCVATIYVRYKQVHAL  |
| A1A4M6 | YVRGFNHPGCFCEPLPGEPNKTSLVTFQTDLSGYLPQSV    |
| Q8BKE5 | LRCDPQVLQMLKEEHQIILENQKNFGLYVQEKRDGLRRRQR  |
| Q96CE8 | GICFSGIMMLIVTTVLLVLENNNNYKCCQSENCSSKKYVTLL |
| O55125 | LWRFSGGYPALMDCMNKLNKEYLEFRKERSKMLLSRRNQ    |
| Q62447 | TSVLKTRFSYAFPKEFFYRMNHILECEFYLLELMDCCCLIVY |
| Q8R1M8 | NLVAIFKAPTNLDPVRIQVNWESVSGIAEFWLNKGPLGRK   |
| P52744 | HKKIHTRENFYKCECGKTFNWSTNLSKPKKIHTGEKPYKC   |
| Q3Y5Z3 | PLPKGACAGWMAGIPGHPGHNGTFRDGRDGTPEKGEKGD    |
| Q9NYW4 | WLKQRAYNLSLWCLLGYFIINLLLVQIGLTFYHPPQGNSS   |
| Q64ET8 | RENCRRKMSKSDSCQDTAGNCPEKECSLSLNKRSSTAV     |
| O55060 | PRANIGKFDRIWDRGALVAINPGDHDRYADIILSLLRKEFQ  |
| Q8WXK3 | QQQARCVQLLLAAGAQVDARNIDGSTPLCDACASGSIECVK  |
| Q9H6K1 | LSSFETEFTQPHRKEGPNFPFASPQKNRQSDENNLKDPG    |
| Q9BYL1 | LVYVEAFSQHAITGRALLRLNAEKLQRMGLAQEAQRQEVLO  |
| P63103 | TELRDICNDVLSLLEKFLIPNASQAESKVFFYKMKGDYYRY  |
| O00233 | VDDEIVEFGSVNTQNFQSLHNIGSVVQHSEGKPLNVTVIRR  |
| P05813 | FRPICSANHKESKMTIFEKENFIGRQWEISDDYPSLQAMGW  |
| Q96CG8 | GFKGEKGECLRESFEESWTPNYKQCSWSSLNYGIDLKIAE   |
| Q9NYV7 | PSAIGNYIQIQLLMEHLPRNSTVTDKLENFHQYQFQAHTV   |
| P45879 | GWLAGYQMNFE TAKSRVTQSNFAVGKTDDEFQLHTNVNDGT |
| Q8NE22 | CYQEFDVPVAVFPFIELKQYLPNIAYSYDKQSPLRVVVALR  |
| Q02105 | VSSGGVLLRLQRGDEVWLSVNDYNGMVGIEGSNSVFSGFLL  |
| Q5M956 | GWNHDSHVIRFPLNGYCHLNSVQVLERLQQRGFIVGSCG    |
| P21583 | FAFGALYWKKRQPSLTRAVENTIQINEEDNEISMLQEKEREF |
| Q5TBK1 | MALENNYEVI FREPDTRWKFNVQELARRNIHGVSREKIHRM |
| P51177 | EVVDRI FLLVDENGDQQLSLNEFVEGARDDKWMKMLQMDL  |
| Q3SZ21 | DLVCITVTEKLPFYFKRPPINVAIDRGVGFELLYSPAIKDS  |
| P47803 | SAAVAWGRYHHFCTRSLDWN TAVSLVFFVWLSSAFWAALP  |
| Q9BQQ7 | PRVHSIYKVEEVVWPWASGENVYSYACQNHICRNLSIFCCC  |
| Q68FF9 | RGGKPTLLFTFVLAFLFCTLNGYLSQRYLSQFAVYAEDWVT  |
| Q9CX92 | FGFQVKPIYLCDTESLGKKNILKCMVPEHFECTIFLIAMY   |
| P40306 | TIAGLVFQDGVILGADTRATNDSVVADKSCKEIHFIAPKIY  |
| P28801 | DMVNDGVEDLRCKYVSLIYTNYEAGKEDYVKALPQHLKPFEE |
| P04973 | ADEAFYKQPFADVIGYVTNINHPCYSLEQAAEEAFVNDIEE  |
| Q80XF5 | RFTPWETKLDPPVVTITRVNASLRVLLRPPELPNRNQS GK  |
| P21796 | FGIAAKYQIDPDACFSARVNNSSLIGLYTQTLKPGIKLTL   |
| Q99714 | VAGEMQNEPDQGGQRGVIINTASVAAFEGQVQAAAYSASK   |
| Q1ZZU3 | GPVHLRGRSPTPALDPLAPLNPLIRGPRTPGLRRWIQSLAL  |
| Q9NVA1 | RIIVHFMWEDVQQRGRVMGVNPIYILKKNMILMTNHFYAAIL |

|        |                                            |
|--------|--------------------------------------------|
| Q8N954 | LRQIREARRKEEKQQEANLKNRQKSLKEEERDRDIGLKNA   |
| P09056 | RMVAYLSASLTNITRDQKVLNPTAVSLQVKLNATIDVMRGL  |
| Q8VDK3 | TFLPNASFCDPLMPWTDLFSNEDYYPAFEHQACDSYWTSV   |
| Q16637 | PPPPMPGPRLGPGKPGKFNFGPPPPPPPHLLSCWLP       |
| Q86Y79 | ELDKPLGRLALKLGGSSARGHNGVRSCISCLNSNAMPRLVG  |
| Q9BPW5 | LQLASMLGCSFYEVSVSENYNDVYSAFHVLCKEVSHKQPS   |
| Q8BG34 | PDEMPPELLLQAPTRTASSLNRYPVLPSINRRSLEVGAVDT  |
| Q9H160 | NEPTYCLCNQVSYGEMIGCDNEQCPIEFHFHFCVSLTYKPK  |
| O70552 | IRINNENKDPVLERACAESNVFFHLGLPKEMTIWVDPYE    |
| B5L3F2 | QISMMLKNNISFMYGNYEIIINNNSIVGKFVAPQKITYNKLL |
| P97823 | QAAETVKALIDQEVKNGIPSNRIILGGFQGGALSLYTALT   |
| Q86XK3 | EFQESFKHIDSEFEENTNLKNTLKNLNVCESQSLDSGSCSA  |
| Q9D3G2 | WAPNISDITYSWRWEQTVDFNGEVRSHFNGQVLSVSLGLG   |
| Q8BHX3 | RTKQIESDRQTLLEVENLYNIEILRLPKALQGMKWLDFYA   |
| P61267 | KLSEDVEQVKQHSAILAAPNPDEKTKQEBLDTTDIKKTA    |
| P01211 | YGGFMKMDLYPLEVEEEEANGGEVLGKRYGGFMKDAEED    |
| P97361 | IHLVLDGCTHSPGSLKISLLNGVTPVQSFLDNLTGILTKVL  |
| A6NKC4 | LVNTVLWVTIRKELKRKKWNLEISLDSGHEKKVIVSSLQED  |
| P36368 | TRWQKPDLLQCVFITLLPNENCAKVVYLQKVTDVMLCAGEMG |
| Q8CG80 | QGFMMKLSRTEKHKYVLGQNSPPFSSVFEIVHHYASRKL    |
| Q8SQH5 | CVVRIPKEQGVLSFWRGNLANVIRYFPTQALNFAFKDKYKQ  |
| Q3KNJ2 | AHKDSGETQASSSTSPRGTDNQPEEPVLSLSTLSEPEYEPV  |
| P60202 | TEKLIETYFSKNYQDYEYLINVIHAFQYVIYGTASFFFLYG  |
| Q5E9B7 | LDIFAKFSAYIKNSNPALNDNLEKGLLKALKVLDNYLTSPL  |
| Q8BW00 | ELDKPLGRLALKLGGSSARGHNGVRSCISCLNSNAMPRLVG  |
| Q3T144 | VGSYTTTINISLIPRSEHLVNFATAEMGGPYSYVYFFCTL   |
| O54831 | YMLDFIEDMEYLVKALTCCHNYSIKTPENLDEAQQIPFNEF  |
| Q17QK6 | GQPEEASPEEQEEACAEEANGGEERPEDDGEAAYLDEL     |
| Q0VD50 | KKKGLISAYHRVIMAEELATKNSKWVEVDTWESLQKEWTETA |
| P36369 | QEEPSAQHRLVSKSFPHPGFNMSLLMLQTTTPGADFSNDLM  |
| O08603 | KKCLTQPLKNLCQKLRNKVSNTKVDTHKTNGYPHLQVTMIY  |
| Q8NB15 | GERRIYRHRVSSEFLKPVLMCSVLRILGCTWAAALLILN    |
| P50294 | FTSRRFSYKDDVDLVEFKYVNEEEIEDVLKTAFGISLERKF  |
| Q9CWY9 | QVGSPhwkETFRQGLERMNSRHRLLNKYRQAAGSTPGTA    |
| Q6P7N7 | WRLARGVISTDDEVFKPFQANSHFVKFKYAQEYDSGTYRCD  |
| Q3T186 | SKAEAKKLAGRAAVENHVRNNQVLGIGSGSTIVHAVQRIA   |
| Q9Z2D8 | YLGGSMDLSTDFRTGKMLMKNKSRQVRVYDSSNQVKGK     |
| Q9QYL7 | SLHNTPMGARKRSPFRYDLWNLKYLHRFTWSHLEHLAFER   |
| Q9UKR0 | LLRLRLPVRVTSSVQPLPLPNDCATAGTECHVSGWGITNHP  |
| Q9BSJ6 | VGALGSLCRQFQRRPLRAVNLNLRAGPSWKRLETPEPGQQ   |
| Q8R3J5 | LEDREGCTWGVAYQVRGEQVNEALKYLVNREAVLGGYDTKE  |

|        |                                            |
|--------|--------------------------------------------|
| Q9HAC8 | FEGRKEIWDALKAAAYAAEANDHELAQAILDGASITLPHGT  |
| Q8TBE9 | QPGDCVMVGDITLETDIQGGLNAGLKATVWINKNGIVPLKSS |
| Q58DN3 | HQHFQEPEVGCCKYFLFGFNIVFWVLGALFLAIGLWAWSE   |
| Q92688 | DISTLEPLKKLECLKSLDLFNCEVTNLNDYRESVFKLLPQL  |
| P05820 | AKPAPSQYDYRSMNMKQMSGNVTFPIVALAHYLVGNGAERS  |
| P41047 | INETGLYFVYSKVYFRGQSCNNQPLNHKVYMRNSKYPEDLV  |
| Q8BTZ5 | DPNIRDSRGRGLHLAAARGNVDICQLLHKFGADPLATDYQ   |
| O54879 | GKMSAYAFVQTCREEHKKKNPEVPVNAEAFSKKCSERWKT   |
| P47757 | PLEDGAMPSARLRKLEVEANNAFDQYRDLYFEGGVSSVYLW  |
| P01213 | DLYKRYGGFLRRIRPKLKWQKRYGGFLRRQFKVVTRSQE    |
| Q6PHN9 | VYDVTSAESFVNVKRWLHEINQNCDDVCRIILVGNKNDPPER |
| Q9JL59 | NYSWKLHGFQAEFKFNLTVNAADRQKTEDLPVTKVPDKPP   |
| P19652 | YFTPNKTEDTIFLREYQTRQNCQFYNSSYLVQRENGTVSR   |
| Q8VHZ7 | PVGLIVSHLPPGPTAYFTLCNVVMRHDIPDLGTMSEAKPHL  |
| P26892 | ICEKNDECESSKETLAENKLNLPKMEEKDGCQSGFNQAIC   |
| Q17QN8 | IPWKVQFNLGNSRSPSNQCRNSIQGKHLITDELGYVCERRD  |
| Q8NC01 | NKAGAHRCSPCTEQWKWHGDNCYQFYKDSKSWEDCKYFCLS  |
| Q9HAV7 | ALALSRLRPSRLLCTATKQKNSGQNLLEEDMGQSEQKADPPA |
| P13972 | YLDKQFFVDVFSIPACVRNTNGDLSATNEKFSKEFIGSLDI  |
| Q8BZ09 | GLTEAVVNPFEVVKVGLQVNRNLFKEQPFSTFAYARQIIKK  |
| Q80VJ2 | MRCPAGGAEVEMAELYVKPGNKERGWNDPPQFSYGLQQTG   |
| Q8TAG5 | SVLYVQQGLSSQAKFTEFFRNVTATEGQNVEMSCAFQSGSA  |
| Q9NWS0 | RELVITIAREGLEDKYNLQLNPEWRMMKNRPFMGSISQQNI  |
| Q16534 | LPLNPTFIPPPYGLRSLLENPLKPLPHHEDAFSKDKDKEK   |
| Q9TU47 | IEDQDELSSLLQVPLVAGTVNRGSEVIAAGMVVNDWCAFCG  |
| Q8TDQ7 | GSSLVSRRLKTLAMDTILANAKYFDGDLKVPMTALTVGV    |
| P05529 | YMLSKNSINRYSMSDFIQSNNETTQKRHLKLEWEQETDT    |
| Q9CR36 | KIAGMCRGIPTYVAEEIPGPNQPLYSKKCYTADILWILRMS  |
| Q9CX47 | SGTELLARLEGRSSLKELEPNLFAEDSPVHGDI FEFHGPE  |
| Q2NL01 | SEAEPAFRFLVDSSKKEPRWNFWKYLVNPEGQVVKTWRP EE |
| Q9UMX6 | DEEASQYVEGMFRAFDKNGDNTIDFLEYVAALNLVLRGTLE  |
| Q6NTF7 | CGSQVPVEVMGFPKFADCWENFVDHEKPLSFNPKMLEELD   |
| O94778 | IGFAVTVDILAGGPVSGGCMNPARAFGPAVVANHWNFWHIY  |
| P07628 | DDLQCVFLKLLPIKNCIENHNKVTDVMLCAGEMSGGKNIC   |
| Q8BTG6 | LLQVQDREQPIPWKVQFNLGNSRSPSNQCRNSVQKHLITD   |
| Q9H0X6 | RPTPTLAPKRAWPSDETEIVNQACGGDMPALEGAPHTPPLP  |
| P0AG05 | ALNETLTLWNSPPDWAGDERNVVLTLSRIWYSAVTGKIAPK  |
| Q9NPB1 | FELEPLPGAVEAVKEMASLQNTDVFICTSPIKMFKYCPYEK  |
| P02747 | YRSGVKVVTFCGHTSKTNQVNSGGVLLRLQVGEEVWLAVND  |
| Q3SYR3 | KEAGCRLRIMKQDFEYIWQNFVEQEEGESKAFEPWEDIQE   |
| Q68FF9 | MAWPLYECIRPAAARLGNLPNRVLLAMFLIHVYQRTLVPV   |

|        |                                            |
|--------|--------------------------------------------|
| A6NJV1 | LHKPSYTRFNLDShRSTELTNFYQMvQHRKYYQDKTGTVP   |
| Q2YDP3 | HMDGDKGPRRGRKSGSSGRKNGMGSKGDKKLSGTDSEQE    |
| Q9R1Q6 | SVASLGLSLRSMYGRSSQALNEEESERKLLDGHAPASPAK   |
| Q7RTY3 | EGRWILAGVLSWEKACVKAQNPVYTRITKYTKWIKKQMSN   |
| Q24K06 | RLLPGQLQRLRELRTIWLsgNLLTDFPPVLLHMPFLEI IDV |
| Q12846 | MQSEYREKNVERIRRQLKITNAGMVSDEEELQMLDSGQSEV  |
| Q8IYP2 | STWSYNVCDIYKEPDSLQTVNISVISKQPQRDAYKTYNITE  |
| Q3ZBE1 | LASEIYDILQSSNMADGDSFNEMNSRRRKAQFFLGT TNKRA |
| P59544 | NHFSMWLAANLSIFYLLKIANFsnLLFLHLKRRVRSVILVI  |
| Q8C432 | ELLLTPKRLASLVSPSHTSSNCLVITIMEVQRESSPSLSST  |
| Q8NC54 | SRTDSPSPTVLNSHISTPNVNALTHENQTKPSISQISTTLP  |
| Q9CQ07 | EKAQQALVQKRHYLFDVQRNNIALALEVTYRERLHKAYKEV  |
| P97328 | KYPEEDTDRRCLSRWQRGGNASNSCTVLSLlgARCAFmGS   |
| A0JNC3 | LGLGITIAFLATLITQLLVYNGVYQYTSDFLYIRSWLPCI   |
| P26441 | IRSDLTALTESYVKHQGLNKNINLDSADGMPVASTDQWSEL  |
| P0DMC8 | IKYIKRHFPsLSIIVLTMNNPAILSAVLDLDIEGIVLKQG   |
| Q9TVC8 | SDWDEYRAVTPlGRPDAEYFNsQKDFLEQTRAEADTVCRHN  |
| Q0VCT4 | DANEeYLFKAMVAFsMRKVPNRETTEISHVLLCNVTQRVSF  |
| Q9Z1P5 | ESCAQNGQCQPQsALPCsCDNISGCSDVSDKNLNCsRPPCQ  |
| P15319 | PRSEQTVKSANYNTPYLSYINDYGGRPVLSFCNGSRCSVK   |
| P61027 | BQIAREHGIRFFETSAKANINIEKAFLTLAEDILRKTpvKE  |
| Q53HI1 | FEFAAWQMLYLFTSPQRVYRNFHYRKQTKDQWARDPAFLV   |
| P43464 | QYTVLYTSNCTIDVYtKEGSNTYLRNELIFLergINISVRL  |
| Q9JKE2 | LEEERYDLVEGQTLTVKCPFNIMKYANSQKAWQRLPDGKEP  |
| P26838 | TNYFESPFKGLLLEQVKNPNIKVGRYSYSGYYHGHSFDD    |
| P61266 | IRKTQHSTLSRKFVEVMTEYNATQSKYRDCKDRIQRQLEI   |
| Q8NGA4 | LGEWACKLYTGfVFLTFSTSNCLLVLSVDRcISVLYPVWA   |
| P28067 | SCIVTHEIDRYTAIAYWVPRNALPSDLENVLCGVAfGLGV   |
| Q5E9V3 | ETKAQINHNIAmQNEKLDGINLESgSQAPFTPPNTPDPRS   |
| Q62000 | NAKHNKIKSKGIKANTFKKLNKLSFLYLDHNDLESVPPNLP  |
| P67868 | TGFPHMLFMVHPEYRPKRpanQFVPRlyGFKIHpmAYQLQL  |
| Q07817 | RIAAWMATYLNdhLEPWIQENGgWDTFVELYGNNAAESRK   |
| Q9NVX0 | MNqALAKMDILVTETEELAENILKWRKQqNEVSSCI PKILA |
| Q9JJ57 | KRELQVLYRGFKNECPsGVVNEETFKQIYAQFFPHGDASTY  |
| P21796 | GSLETKYRWTEYGLTFTEKWNtDNTLgTEITVEDQLARGLK  |
| Q9Z1Q5 | SGLDIFAKFSAYIKNSNPALNDNLEKGLLKALKVLDNYLTS  |
| Q2YDP6 | MKEMQKDMDEKMDVlinIQKNSKFPLRRGLKMQQELRLIGK  |
| O95484 | GILVLIpVCWTAHAI IQDFYNPLVAEALKRELgASLYLGWA |
| Q6P2I7 | VGNENEERGTPYASRFKdMPNFIALEKSSVLRHCCDLLIGI  |
| Q9WU03 | YDTEKNSCISFIYGGCRGNKNSYLSQEACMQHCSGKQMHFP  |
| P15328 | PEDKLHEQCRPWRKNACCSTNTSQAeHKdVSyLYRFNWNHC  |

|        |                                              |
|--------|----------------------------------------------|
| P35705 | YGVLLLEGPLALRGLFIIDPNGVIKHLVNDLPVGRSVEET     |
| Q9CQ29 | GEHHNCYRELRDAWVQRHERNRTLLGLLGRVRRVHLTTSI     |
| P41439 | RTSYTCKSNWHKGNWNTSGINECPAGALCSTFESYFPTFAA    |
| P09564 | GVACVLARTQIKKLCSDRDKNSAACVVYEDMSHRCNTLSS     |
| Q8BFU0 | DYSQCQGNRWRNRKRASYVSNPICKGCLSCSKDNGCSRCQQ    |
| Q9BRQ4 | SDSSGQWIIILGTEVKKIEAINVPCQLSMSFFHRLYDEDIV    |
| Q14681 | MSDGWKFEQLISIGSSYNYGNEDQAEFLCVVSRELNNSTNG    |
| Q9H2R5 | EARSHRNDIMLLRLVQPARLNPQVRPAVLPTRCPPHGEACV    |
| P50540 | RAQKHSSGSSNTSTANRSTHNELEKNRRAHLRLCLERLKV     |
| A6NJI9 | LHHNELTNIDATVKELKGMNLKILSLYQNPLCQYNLYRLY     |
| Q8IUW5 | GEVTVLSVGRFRVTKVEHKSQKERRSLMSVSGAETVNGEV     |
| Q9D722 | RGISTPKEFNAGENSTSLDVNHTGAAIEPLRSSVLRLPSES    |
| Q86WI0 | ALYPLGWNSPEIMQTCGNVSNQFQLGTCLRGWAYCAGGGA     |
| P0DMS9 | KRSFVLDTASAIICNYNAHYKNHPKYWCRGYFRDYCNIIAFS   |
| A8MUP6 | DKFIQRGFHVGLWQSCSESLNGEDEKCRSFRSVVPAEEQGV    |
| Q8N7S6 | KAVTCAAHLPGAASRPLSPNKPDRVRPQQRDRIGAKRQRR     |
| Q9NY72 | LIEMIYCYRKVSKAEAAQENASDYLAIPSENKENSAPVVE     |
| Q8BGZ2 | VQPNSIPSAIYPAPVAAPRTNGVAMGMVAGTMMAMSAGTLL    |
| A2AWP0 | RAVSIVFVPCGHFVCTECAPNLQLCPICRVVICSVRTFLS     |
| P61981 | KELEAVCQDVLSDLDNYLIKNCSETQYESKVFYLMKMGDYY    |
| O08756 | VAGEMQNEPDQGGQRGVIINTASVAAFEGQVQAAYSASK      |
| Q64124 | RKLSKIETLRLASSYISHLGNVLLVGEACDGGQCHSGPAF     |
| Q2KJD3 | EEQARKEQEQAEEERIRMENILSGNPLNLTGSPQPQANF      |
| Q99990 | MKKTAIRLPKGKQKPIKTEWNSRCVLFTYFQGDISSVVDEH    |
| Q0Z7W6 | CQNLQPEWESFAEWGEDLEVNVAKVDVTEQPLSGRFTIITA    |
| P47879 | ASQSRTHEDLFIIPINCDRNGNFHPKQCHPALDQGRGKCW     |
| Q5UKY4 | CHREKNNGHSVFCFISHLTDNWLISMEQNRGTTTILPSLLS    |
| P09067 | SSLSGSYRDPAMHTGSYGYNYNGMDLSVNRSSASSSHFGA     |
| Q96FW1 | KSKEDLVSQGFTEFTIEDFHNTFMDLIEQVEKQTSVADLLA    |
| Q3ZBR5 | MPDEEKKRRREESSRLKEEGNEQFKKGDYIEAESSYTRALQ    |
| Q96PG2 | VTAWRGDCPSAKNDDACLVPNTPLHLKGLPVEPPSYQSVI     |
| Q9P2W1 | ILLRYLQEQRNPYSSQDVFGNLQREHGLGKAVVVKLEQLA     |
| P13725 | ARPNILGLRNNIYCAQLLDNSDTAEPKAGRGASQPPTPT      |
| Q9R088 | GKMPEVDYAILSEWFDWIVRNIDVSDLIVYLRTTPEICYQ     |
| Q8CHJ2 | AGMILAVLLHQGHLPRLFQRNLFYRQKSKYRTPRGKLSFGS    |
| Q5XFZ0 | HHGKSRSFLWALKSNAATAANKASPKTPKRTAPGSANLQGS    |
| Q80XM9 | IVMILTMLMLKLCTEVRVANELNIKRRSFAATDSKDEELR     |
| Q6PAM0 | QVILNKDTNISCDPALPEPNHVMLNHLYALSIIKDSVMVLS    |
| P25402 | DAKNKMGVFSPPFSKVCVCLGNVNTSGNITVTFANDYGVATSYT |
| P25402 | RDEAENNIKINSGTDSCLENTTPYYFAISDVKINGKSIDL     |
| A6NDD5 | DREPQEGPPEQPTGPGQAAENVTIQTVSYGVQEELRDQEDD    |

|        |                                              |
|--------|----------------------------------------------|
| P09428 | LDLGSMDGNIQLQISHQFYNKSFQVVSIVAMEKLRNSA       |
| P18469 | LEDARATVDTYCRHNYEIFDNFLVPRRVEPTVTVYPTKTQP    |
| Q3SZX2 | LHYNEGLNIKLARQLISKDLNDEEEDDEEMSETAAGESMME    |
| Q64368 | PGADILPNECSVHDAAPASGNQPQKKSVDRSIQTVVSVCLFN   |
| Q8K2J7 | VERDVCQRCRHKRWHFIKPTNKTKEGRPRRQGEVTVLSVGR    |
| Q9NVZ3 | NGRRAFIGIGFGDRGDAFDNVALQDHFKWKQCEFAKQA       |
| P54821 | PALGGRLDSPGNLDTLQAKKNFSVSHLLDLEEAGDMVAAQA    |
| P24158 | QQHFSVAQVFLNNYDAENKLNVDLLIQLSSPANLSASVATV    |
| Q91YQ1 | SKENGF TGWTE TSVKENKNI NEAMRVLVEKMMNNSREDVMS |
| Q9Y275 | EAPAVTAGLKI FEPPAPGEGNSSQNSRNKRAVQGPEETVTQ   |
| Q6BCY4 | IGETIFFRGPGRFLFYHGPGNLGIRPDQ TSEPKKTLADHLG   |
| Q8IY45 | IIDLGGCLSI TDVSLHALGKNCPFLQCVDFSATQVSDSGVI   |
| O60812 | DGRMIASQVVDINLAAEPKVNRGNAGVKRSAAEMYGSSFDL    |
| Q8CGF5 | FFDEATITDPLWGDPTYVNI NIATASGYLISDLLIILFNWK   |
| P52943 | DGKPFCHKPCYATLFGPKGVNIGGAGSYIYEKPLAEGPQVT    |
| Q15848 | GAYVYRSASFVSGLETYVTIPNMPIRFTKIFYNQQNHYDGST   |
| F1MIW6 | WVPWKYRMFLRDELCKIQEDNLFFEFCDVVKKAYGKCAIVV    |
| Q99LS3 | SGGFRSIVEHVAAKLNIPTTNVFANRLKFYFNGEYAGFDEM    |
| Q8NH89 | IFYGTLSYMYLQPQSNNQENMKVASIFYGTVIMPLNPLIY     |
| P49721 | LIGIQGPDYVLVASDRVAASNIVQMKDDHDKMFKMSEKILL    |
| Q9NZQ0 | TTNSASF TKEQADAIRRIRNSKDSWMDLGVKPGASRDEVN    |
| P05531 | RLHIKRKRMETYIKDSFKDSNVKLEQLWKTNKQERKKINNK    |
| Q9CQL0 | ANLPPHIQPKAVVKELTWGQNLESFSPGEFDLILGADV IYL   |
| Q3T046 | VHHGTILDCEETDWD FSNMLNVRSMYLMIKAF LPKMMAQKS  |
| Q9Y6Z7 | NTLIADYVAKSGFFRVFIVGNDLEREGQYMTDNTPLQNY S    |
| Q5E9V3 | RSDKYTFENFQYETRAQINHN IAMQNEKLDGINLESGSQQA   |
| A2VDU1 | TLPSCWVCNQECLCSAQTLVNYGTCMCLVQGI FYHCTNEDD   |
| O14818 | KSVAKLQDERTVRKICALDDNVCMAFAGLTADARIVINRAR    |
| A6NJI9 | DATVKELKGMLNLKILSLYQNPLCQYNLYRLYI IYHLPGVE   |
| A1XBS5 | MRRTLENRNAQTKQLQTAVSNVEKHFGELCQIFAAAYVRKTA   |
| Q96LJ8 | APPECSTVVSTAVDSL IWQPNSLNMMHIRPKSAKGRTRPSL   |
| P13621 | KELLRVGQILKEPKMAASLLNPFYKRSVKVKSLSDMTAKEK    |
| A8MTZ7 | LSEQPEKDDTPSHTQAQCCLNFGWAFSWLRQRILPSLLRRD    |
| Q9CZE3 | AFVVFDISRSTFDVAVLKWKNDLDSKVHLPNGSP IPAVLLA   |
| Q969J5 | FQSRNFHNI LQWQGRALTGNSSVYFVQYKIMFSCSMKSSH    |
| Q969M3 | QIYQPTQAYTPASPQFFYGNFEDEPPLLEELGINFDHIWQ     |
| Q96Q83 | MEPNPHWHPVLR T LKNRIEENTGHTFN SLLCNLYRNEKDSV |
| Q3SZR9 | CCGIHNYSDWENTDWFKETKNQSVPLSCRETASSCNGSLA     |
| Q6ZWI9 | HFREDVTLDAATASSLLVFSNDRLSAQCKKI HHDLT KD PRL |
| P14415 | AGANQSMNVTCAGKRDEDAENLGNFVMFPANGNIDL MYFPY   |
| P09611 | LVVSNLLLCQGVEDYAPYCKNQPNCRIPLQSLFERATLVA     |



|        |                                             |
|--------|---------------------------------------------|
| P0C591 | PGAFELERLFWKGSPOYTHVNEVWPPLYIGDETTALDRYGL   |
| Q91XQ6 | QEYIRQLPPSPFYRDDIMSVNPTCLVLIILLFIGILLTLKG   |
| Q01105 | DHSDAGADELGEVIKDDIWPNPLQYYLVFDMDEEGEGEED    |
| Q8C8S3 | ASFGMTLLGNFQLTNDDEIHNVTSLTFGFGTLTCWIQAAL    |
| Q91Z38 | IEERNERLKEEMLGKLDLGNLVLRFPGGLSTENFQIKQDSS   |
| P05937 | PVQENFLLKFQGIKMGKEFNKAFELYDQDNGYIDENELD     |
| Q9H8W3 | STTSRFRGKRRKRSRKDKLNEKELHSEPSNETQWKELTQ     |
| Q32KL2 | SRATAGAYIASQTVKKVIEINPYLLGTMAGGAADCSFWERL   |
| P20151 | EPEDTQQRVPVSHSFPHPLYNMSLLKHQSLRPDEDSSHDLM   |
| Q9QXF8 | SFAHLPDCKGDQSEHRLALKNIASMVPRGGLLVIDHRNYDY   |
| Q9D7P7 | LEETLGPDPDFPSLAPRYRESNTAGNDIFHKFSAFIKNPVPT  |
| Q05716 | EIEAIQESLQPSDKDEGDHPNNSFSPCSAHDRKCLQKHLAK   |
| A7MBE4 | EAVDMLDGLVDESDDPVDVDFPNSFHAFQTAEGIRKAHPDKDW |
| P15947 | SGWGSITPVKYEYPDELQCVNLKLLPNEDCAKAHIEKVTDD   |
| P70660 | STSGLSVPARRSAPALSGASNVPGAQDEEQERRRRRGRARV   |
| P00492 | LKGGYKFFADLLDYIKALNRNSDRSIPMTVDFIRLKSVCND   |
| Q96S79 | QQILETRVIGTSETPIIIVGNKRDLQGRVIPRWNVSHLVR    |
| P08074 | AMTMLTKAMAMELGPHKIRVNSVNPTVVLTDMGKKVSADPE   |
| Q3KP22 | IENKEVITQELEDVSRVVLGNLDNLQPFATEHFIVFPYKSK   |
| Q8BZJ7 | RQFMACTQASERTAIYCLTQNEWKLDEATDSFFQNPEAFHR   |
| P16110 | NDALAGSGNPNPQGYPGAAGNQPAGAGGYPGAAYPGAYPGQA  |
| P01732 | WLFQPRGAAASPTFLLYLSQNKPKAAEGLDTQRFSGKRLGD   |
| Q9D0U1 | CSFQLQHGAQIRLSKEYLLRNGLYPKMPKPKRKRKRKMEML   |
| Q8TC29 | DKRTGDKHDLEPSGLVPKYINKKDYGVTPYICKRNEEIKK    |
| Q9ERI2 | EEARELAEKYGIPYFETSAAANGTNI SHAIEMLLDLIMKRME |
| Q2YDE4 | TVLSIDFKPSEIEVGVVTVENPKFRILTEAEIDAHLVALAE   |
| P00755 | SGWGSIIIPVKFYAKDLQCVNLKLLPNEDCDKAYVQKVTDV   |
