# Supplementary material for: Prediction of N-linked glycosylation sites using position relative features and statistical moments
Source: PubMed Central journal article supplement (PMC5552137; doi:10.1371/journal.pone.0181966), 2017-08-10
Supplement: pone.0181966.s002.pdf [file pone.0181966.s002.pdf]

## Supplementary Data Set (S2) of Positive N-Linked Site

| Accession No | List of Sequences for Positive N-Linked Sites |
|--------------|-----------------------------------------------|
| P30443       | NMKAHSQTDRLNLTGLRGYYNQSEEDGSHTIQIMYGCDVGPD    |
| P01892       | KVKAHSQTHRVDLGTGLRGYYNQSEAGSHTVQRMYGCDVGS     |
| P05534       | KVKAHSQTDRENLRIALRYYNQSEAGSHTLQMMFGCDVGS      |
| P01891       | NVKAQSQTDRLVLTGLRGYYNQSEAGSHTIQMMYGCDVGS      |
| P01889       | IYKAQAQTDRESLRNLRGYYNQSEAGSHTLQSMYGCDVGP      |
| P03989       | ICKAKAQTDREDLRTLRLYYNQSEAGSHTLQNMYGCDVGP      |
| Q04826       | ISKNTNTQTYRESLRNLRGYYNQSEAGSHTLQSMYGCDVGP     |
| P30501       | KYNRQAQTDRLVLRKLRGYYNQSEAGSHTLQRMYGCDLGP      |
| Q07000       | NYKRQAQTDRLVLRKLRGYYNQSEAGSHIQRMYGCDLGP       |
| Q95604       | KYKRQAQADRVNLRKLRGYYNQSEAGSHTIQRMYGCDLGP      |
| P22282       | DVFKYLYNTHSADTYLSNKNESFTMNIWGFGEIEMVKTKC      |
| P01912       | LAGDTRPRFLEYSTSECHFFNGTERVRYLDRYFHNQEENVR     |
| P01911       | LSGDTRPRFLWQPKRECHFFNGTERVRFDRYFYNQEEVSR      |
| P01446       | LAYKTCPAGKNLCYKMFVSNKTVPVKRGCIDACPKNSLLV      |
| P10852       | HLEYLSTLKVKGLVLPPIHKNQKDEINETDLKQINPTLGSQ     |
| P10852       | TLKVKGLVLPPIHKNQKDEINETDLKQINPTLGSQEDFKDL     |
| P10852       | SSWLQDGVDFQFRDVGKLMNAPLYLAEWQNI TKNLSEDR      |
| P10852       | FQFRDVGKLMNAPLYLAEWQNI TKNLSEDRLLIAGTESDDL    |
| P10852       | DVGKLMNAPLYLAEWQNI TKNLSEDRLLIAGTESDDLQQIV    |
| P10852       | QIVNILESTSDLLLTSSYLSNSTFTGERTESLVTRFLNATG     |
| P10852       | YLSNSTFTGERTESLVTRFLNATGSQWCSWSVSQAGLLADF     |
| P10852       | ELGLQGALPGQPAKAPLMPWNESSIFHI PRPVS LNMTVKGQ   |
| P10852       | APLMPWNESSIFHI PRPVS LNMTVKGQNEPGLSLTQFRRL    |
| P08195       | FQVRDIENLKDASSFLAEWQNI TKGFSEDRLLIAGTNSDDL    |
| P08195       | AEWQNI TKGFSEDRLLIAGTNSDDLQQLSLESNKDLLLLT     |
| P08195       | YLSDSGSTGEHTKSLVTQYLNATGNRWCWSLSQARLLTSF      |
| P08195       | APVMLWDESSFPDIPGAVSANMTVKGQSEDPGSLLSLFRRL     |
| O95264       | LYHLSKQLLQKYHKEVRPVYNWTKATTVYLDLFDVHAILDVD    |
| O95264       | QILKTSVWYQEVWNDEFWSNNSMFDEIREISLPLSAIWAP      |
| O95264       | IIINEFVDIERYPDLPIVYVYVNSSGTIENYKPIQVVSACSLE   |
| O95264       | PIQVVSACSLEYAFPFVQNCSTFKSILHTVEDVDLAF         |
| O95264       | VDLAFRLSPEDIQHDKKAFNDSEWELLSVSSSTYSILQSSA     |
| O95264       | CRARIVFKTSVLVGYTVFRVNMNSQVPRSVGSTPLIGHFFT     |
| P34969       | PHLLSEVTASPAPTWDAPPDNASGCGEQINYGRVEKVVIGS     |
| P21589       | HTNDVHSRLEQTSSESSKCVNASRCMGVARLFTKVQQIRR      |
| P21589       | KIEFDERGNVISHGNPILLNSSI PEDPSIKADINKWRIKL     |
| P21589       | SIPEDPSIKADINKWRIKLDNYSTQELGKTIVYLDGSSQSC     |

|        |                                              |
|--------|----------------------------------------------|
| P21589 | HVSMCILNNGGIRSPIDERNNGTITWENLAAVLPFGGTFDL    |
| Q61503 | HTNDVHSRLEQTSDDSTKCLNASLCVGGVARLFTKVQQIRK    |
| Q61503 | KVEFDDKGNVITSYGNPILLNSSIPEDATIKADINQWRIKL    |
| Q61503 | SIPEDATIKADINQWRIKLDNYSTQELGRTIVYLDGSTQTC    |
| Q61503 | HVSMCIVNNGGIRSPIDEKNNGTITWENLAAVLPFGGTFDL    |
| P02763 | LPLLEAQIPLCANLVPVPI TNATLDQITGKWFYIASAFRNE   |
| P02763 | LDQITGKWFYIASAFRNEEYNKSVQEIQATFFYFTPNKTED    |
| P02763 | NEEYNKSVQEIQATFFYFTPNKTEDTIFLREYQTRQDQCIY    |
| P02763 | KTEDTIFLREYQTRQDQCIYNTTYLNVQRENGTISRYVGGQ    |
| P02763 | YQTRQDQCIYNTTYLNVQRENGTISRYVGGQEHFAHLLILR    |
| Q60590 | TVLIILSLLPMLEAQNPEHANFTIGEPI TNETLSWLSDKWF   |
| Q60590 | PMLEAQNPEHANFTIGEPI TNETLSWLSDKWFFMGAAFRKL   |
| Q60590 | YRQAIQTMQSEFFYLTTNLINDTIELRESQTI GDQCVYNST   |
| Q60590 | LINDTIELRESQTI GDQCVYNSTHLGFQRENGTFSKYEGGV   |
| Q60590 | SQTI GDQCVYNSTHLGFQRENGTFSKYEGGVETFAHLIVLR   |
| P19652 | LPLLEAQIPLCANLVPVPI TNATLDRI TGKWFYIASAFRNE  |
| P19652 | LDRI TGKWFYIASAFRNEEYNKSVQEIQATFFYFTPNKTED   |
| P19652 | NEEYNKSVQEIQATFFYFTPNKTEDTIFLREYQTRQNCQFY    |
| P19652 | KTEDTIFLREYQTRQNCQFYNSY LNVQRENGTVSRYEGGR    |
| P19652 | YQTRQNCQFYNSY LNVQRENGTVSRYEGGREHVAHLLFLR    |
| P07361 | MILVMVSLPLLEAQNPEHVNI TIGDPI TNETLSWLSDKWF   |
| P07361 | PLLEAQNPEHVNI TIGDPI TNETLSWLSDKWFFIGA AVLNP |
| P07361 | YRQEI QKTQMVFFNLTPNLINDTMELREYHTI DDHCVYNST  |
| P07361 | LINDTMELREYHTI DDHCVYNSTHLGIQRENGTLSKYVGGV   |
| P07361 | YHTI DDHCVYNSTHLGIQRENGTLSKYVGGVKIFADLIVLK   |
| P07758 | IATNLGDFAI SLYREL VHQSNTSNIFFSPVSIATAFAMLSL  |
| P07758 | MLSLGSKGDHTHTQILEGLQFNLTQTSEADIHKSFQHLLQTL   |
| P07758 | LHVHHCSTLSSWVLLMDYAGNATAVFLLPDDGKMQHLEQTL    |
| P22599 | IATNLGDFAI SLYREL VHQSNTSNIFFSPVSIATAFAMLSL  |
| P22599 | MLSLGSKGDHTHTQILEGLQFNLTQTSEADIHKSFQHLLQTL   |
| P22599 | LDVHHCSTLSSWVLLMDYAGNASAVFLLPEDGKMQHLEQTL    |
| Q00896 | IATNLGDFAI SLYREL VHQSNTSNIFFSPVSIATAFAMLSL  |
| Q00896 | MLSLGSKGDHTHTQILEGLQFNLTQTSEADIHKSFQHLLQTL   |
| Q00896 | LDVHHCSTLSSWVLLMDYAGNATAVFLLPDDGKMQHLEQTL    |
| Q00898 | IATNLGDFAI SLYREL VHQSNTSNIFFSPVSIATAFAMLSL  |
| Q00898 | MLSLGSKGDHTHTQILEGLQFNLTQTSEADIHNSFQHLLQTL   |
| Q00898 | LDVHHCSTLSSWVLLMDYAGNATAVFLLPDDGKMQHLEQTL    |
| P01009 | ITPNLAEFASFSLYRQLAHQSNTSNIFFSPVSIATAFAMLSL   |
| P01009 | MSLGTKADTHDEIILEGLNFNLTEIPEAQIHEGFQELRLTL    |
| P01009 | FNIQHCKKLSWVLLMKY LGNATAIFFLPDEGKLQHLENEL    |
| P04217 | FYETQPSLWAESESLKPLANVTLTCQAHLETPDFQLFKNG     |

|        |                                             |
|--------|---------------------------------------------|
| P04217 | LEVPEAQEDVEATFPVHQPGNYSCSYRTDGEALSEPSATV    |
| P04217 | GRRVHRFQSPAGTEALFELHNI SVADSANYSCVYVDLKPPF  |
| P04217 | SPAGTEALFELHNI SVADSANYSCVYVDLKPPFFGGSAPSER |
| Q19LI2 | DSGSEPKLWAEFQSLLEPWANLTLVCAVDLPTKVFELIQNG   |
| Q19LI2 | QVRLETQVLSYRFSLGAITSNNSGIYRCRCGVPEPPVDIHLF  |
| Q19LI2 | VQKPDVQHKGTAGFLIYKPGNYSCSYLTHAAGEPSEPSDIV   |
| Q19LI2 | GLRFLQQRQKPELVVVQMLNSSGTEAVFELHNI STIDSGN   |
| Q19LI2 | ELVVVQMLNSSGTEAVFELHNI STIDSGNYSCIYMEQAPPF  |
| Q19LI2 | NSSGTEAVFELHNI STIDSGNYSCIYMEQAPPFSGSSSEP   |
| Q19LI2 | STRSTSAYLKLFLVGPQHAGNYSCRYTALPFFTFSGISDP    |
| P02750 | PAEIPGYLPADTVHLAVEFFNLTHLPANLLQGASKLQELHL   |
| P02750 | LGHLDLSGNRLRKLPPGLLANFTLRITLDLGENQLETLPDP   |
| P02750 | ARVAAGAFQGLRQLDMLDLSNNSLASVPEGLWASLGQPNWD   |
| P02750 | QNLSDLYRWLQAQKDKMFSQNDTRCAGPEAVKGQTL LAVAK  |
| P08697 | LILSPLSVALALSHLALGAQNHTLQRLQQLVHAGSGPCLPH   |
| P08697 | LRWFLEQPEIQVAHF PFKNMSFVVLVPTHFEWNVSQVLA    |
| P08697 | HFPFKNNMSFVVLVPTHFEWNVSVQLANLSWDTLHPPLVWE   |
| P08697 | MSFVVLVPTHFEWNVSVQLANLSWDTLHPPLVWERPTKVRL   |
| Q7SIH1 | VPSLLHTEETPEKGCLLSHLNETVTVSASLESVRENRSLFT   |
| Q7SIH1 | LLSHLNETVTVSASLESVRENRSLFTDVVAEKDLFHCVSFT   |
| Q7SIH1 | CGNGRQTVSWAVTPKSLGNVNFVSAEAVESQELCGSEVPV    |
| Q7SIH1 | GCGEQNMARFAPNIYVLDYLNETHQQLTAEKSKAILYLNTG   |
| Q7SIH1 | VKMVSGFIPLKPTVKMLERSNVSRTEVSNHVLIIYLDKVTN   |
| Q7SIH1 | NVSRTEVSNHVLIIYLDKVTNETLTLTFTVLQDIPVRDLKP   |
| P28800 | LILSPLSVALALSHLALGAQNHTLQRLKEVLHADSGPCLPH   |
| P28800 | VLLL LNATHFQGFWRSKFDPNLTQRGAFHLDEQFTVPVDM   |
| P28800 | LHWFLEQPEIQVAHF PFKNMSFVVLMPTRFEWNASQVLA    |
| P28800 | HFPFKNNMSFVVLMPTRFEWNASQVLANLTWDILHQPSLSE   |
| P28800 | MSFVVLMPTRFEWNASQVLANLTWDILHQPSLSERPTKVQL   |
| P01023 | VPSLLHTEETPEKGCVLLSYLNETVTVSASLESVRGNRSLFT  |
| P01023 | LLSYLNETVTVSASLESVRGNRSLFTDLEAENDVLHCVAF    |
| P01023 | PKFEVQTVPKIITILEEEMNVSVCGLYTYGKVPVPGHVTVS   |
| P01023 | GVPIPNKVI FIRGNEANYSNATTDEHGLVQFSINTTNVMG   |
| P01023 | EANYYSNATTDEHGLVQFSINTTNVMGSLTVRVNYKDRSP    |
| P01023 | CANGRQTVSWAVTPKSLGNVNFVSAEAVESQELCGTEVPS    |
| P01023 | GCGEQNMVLFAPNIYVLDYLNETHQQLTPEIKSKAIGYLNTG  |
| P01023 | HVSRTEVSNHVLIIYLDKVSNTLSLFFFTVLQDVPVRDLKP   |
| Q61838 | VPSEVYSGVPEKACVSLNHVNETVMSLTLEYAMQOTKLLT    |
| Q61838 | KPGQIVKFRVVSVDISFRPLNETFPVVYIETPKRNRIFQWQ   |
| Q61838 | LFFSGQVLLVDEKGP IPKNITSVVSPLGYLSIFTTDEHG    |
| Q61838 | SVVSPGYLSIFTTDEHGLANISIDTSNFTAPFLRVVVTYK    |

|        |                                             |
|--------|---------------------------------------------|
| Q61838 | YLSIFTTDEHGLANISIDTSNFTAPFLRVVVTYKQNHVCYD   |
| Q61838 | EELVADAQNFEIEKCFANKVNLSPSAQSLPASDTHLKVKA    |
| Q61838 | CGNERKTVSWAVTPKSLGEVNFTATAEALQSFELCGNKLTE   |
| Q61838 | IEKEQTYNTLLCPQDTELQDNWSLELPPNVVEGSARATHSV   |
| Q61838 | GCGEQNMVLFVFNIVVLYNLNETQQLTEAIKSKAINYLISG   |
| Q61838 | NTLPLNFDKAGDHRTFQIRINVSYTGERPSSNMVIVDVKMV   |
| Q61838 | NIQRTEVNTNHVLIYIEKLTNQTGLGFSFAVEQDIPVKNLKP  |
| P26671 | IYNVNIKYNPHIPYRYNFINRTLTVDELDDNVFFTHGYFL    |
| P26671 | PSLIVSLSGNLKYNDIQCSVNVSLIKLNATSTSTILTSKH    |
| Q10651 | TCFSGKLDILKYCRKAYPSMNI TNIVEYSHEVSI SDWCREE |
| Q10651 | PCALDMFTGVEFVCCPNDQTNKTDVQKTEDEDDDDDEDDA    |
| Q10651 | ESDEKDEEPPSSQDPYFKIANWTNEHDDFKKAEMRMDEKHR   |
| Q10651 | EAAAYKPTVIHRLRYIDL RINGTLAML RDPDLEKYVRPIA  |
| P05067 | KAAQIRSQVMTHLRVIERMNSLSLLYNVPAVAEEIQDEV     |
| P05067 | VPAVAEEIQDEVDELLQKEQNYSDVLANMISEPRI SYGND   |
| P08592 | KAAQIRSQVMTHLRVIERMNSLSLLYNVPAVAEEIQDEV     |
| P08592 | VPAVAEEIQDEVDELLQKEQNYSDVLANMISEPRI SYGND   |
| P22760 | FMSDFKVVGSFDEVPPSTDENVTVTETKFNNILVRVYVPKR   |
| P22760 | KAMLSRQHVPVESHFLFKFVNWSSLLPERFIKGHVYNNPNY   |
| Q15758 | SALGVGLALALQGAASAINASVGAAGSAENAPSKEVLDS     |
| Q15758 | FPSNLVSAAFRSYSTTYEERNITGTRVKVPVQGVEGMNII    |
| P01011 | LAAGFCPAVLCHPNSPLDEENLTQENQDRGTHVDLGLASAN   |
| P01011 | VIFSPLSISTALAFSLGAHN TLTLEILKGLKFNLTETSEA   |
| P01011 | FLSLGAHN TLTLEILKGLKFNLTETSEAEIHQSFQHLLRTL  |
| P01011 | LTETSEAEIHQSFQHLLRTL NQSSDELQLSMGNAMFVKEQL  |
| P01011 | FATDFQDSAAAKKLINDYVKNTRGKITDLIKDLDSQTM MV   |
| P01011 | IPYFRDEELSCTVVELKYTGNASALFILPDQDKMEEVEAML   |
| O95477 | NNPCFRYPTPGEAPGVGNFNKSI VARLFS DARRLLLSQK   |
| O95477 | TLQQIKKSSSNLKLQDFLVDNETFSGFLYHNLSLPKSTVDK   |
| O95477 | NLKLQDFLVDNETFSGFLYHNLSLPKSTVDKMLRADVILHK   |
| O95477 | DVILHKVFLQGYQLHLTSLCNGSKSEEMIQLGDQEVSEL CG  |
| O95477 | AAERVLRSNMDILKPIRLTNSTSPFPKELAEATKTL LHS    |
| O95477 | LFSMRSWSDMRQEV MFLTNVNSSSSSTQIYQAVSRIVCGHP  |
| O95477 | LKIKSLNWYEDNNYKALFGGNGTEEDAETFDNSTT PFCND   |
| O95477 | NYKALFGGNGTEEDAETFDNSTT PFCNDLMKNLESSPLSR   |
| O95477 | VGKILYTPDTPATRVMAEVNKT FQELAVFHDLEGMWEELS   |
| O95477 | WTAQDIVAFLAKHPEDVQSSNGSVYTWREAFNETNQAIRTI   |
| O95477 | KHPEDVQSSNGSVYTWREAFNETNQAIRTI SRFMECVNLNK  |
| O95477 | FMECVNLNKLEPIATEVWLINKSMELLDERKFWAGIVFTGI   |
| O95477 | QGIGVQWDNLFESPVEEDGFNLTT SVSMMLFDTFLYGVMTW  |
| O95477 | TGYLTLVKKDVESLSSCRNSSTVSYLKKEDSVSQSSD       |



|        |                                             |
|--------|---------------------------------------------|
| O95477 | AFGDKQSCLRPFTEDDAADPNDSIDIPESRETDLISGMDGK   |
| O95477 | EEEWTTAPVPQTIMDLFQNGNWTMKNPSPACQCSSDKIKKM   |
| O95477 | LPPPQRKQNTADILQDLTGRNISDYLVKTYVQIIAKSLKNK   |
| O95477 | NLQKGENPSHYGITAFNHPLNLTKQQLSEVALMTTSVDVLV   |
| O95477 | VGEWAIRKLGVLVYGEKYAGNYSGGNKRKLTAMALIGGPP    |
| O95477 | VNFAKDQSDDDHLKDLSLHKNQTVVDVAVLTSFLQDEKVKE   |
| P41233 | NNPCFRYPTPGEAPGVVGNFNKSI VSRFLSDAQRLLLYSQR  |
| P41233 | MLRQIKHPNSNLKLDLQDFLVDNETFSGFLQHNLSLPRSTVDS |
| P41233 | NLKLQDFLVDNETFSGFLQHNLSLPRSTVDSLQANVGLQK    |
| P41233 | NVGLQKVFLLQGYQLHLASLCNGSKLEEITQLGDAEVSALCG  |
| P41233 | AAERVLRYNMDILKPVVTKLNSTSHLPTQHLAEATTVLLDS   |
| P41233 | LFSTKSWSDMRQEVMLFTNVNSSSSTQIYQAVSRIVCGHP    |
| P41233 | LKIKSLNWEYEDNNYKALFGGNTEEDVDTFYDNSTTPYCND   |
| P41233 | NYKALFGGNTEEDVDTFYDNSTTPYCNDLMKNLESSPLSR    |
| P41233 | VGKILYTPDTPATRVMAEVNKTQELAVFHDLEGMWEELS     |
| P41233 | WTAQDIMAFNAKPEDVQSPNGSVYTWREAFNETNQAIQTI    |
| P41233 | KNPEVQSPNGSVYTWREAFNETNQAIQTI SRFMECVNLNK   |
| P41233 | FMECVNLNKLEPIPTVRLINKSMELLDERKFWAGIVFTGI    |
| P41233 | QGIGVQWDNLFESPVVEEDGFNLTTAVSMMLFDTFLYGVMTW  |
| P41233 | TGYLTLVKKDVESLSSCRNSSSTVSLCKEDSVSQSSD       |
| P41233 | AFGDKQSCLRPFTEDDAVDPNDSIDIPESRETDLISGMDGK   |
| P41233 | EEDWTISPVPQSIVDLFQNGNWTMKNPSPACQCSSDKIKKM   |
| P41233 | PGAGGLPPPQRKQKTADILQNLTGRNISDYLVKTYVQIIAK   |
| P41233 | LPPPQRKQNTADILQDLTGRNISDYLVKTYVQIIAKSLKNK   |
| P41233 | NLQKGENPSQYGITAFNHPLNLTKQQLSEVALMTTSVDVLV   |
| P41233 | VGEWAIRKLGVLVYGEKYASNYSGGNKRKLTAMALIGGPP    |
| P41233 | VNFAKDQSDDDHLKDLSLHKNQTVVDVAVLTSFLQDEKVKE   |
| P78363 | NNPCFQSPTPGESPGIVSNYNSILARVYRDFQELLMNAPE    |
| P78363 | MGKILYTPDSPAARRILKNANSTFEELEHVRKLVKAWEEVG   |
| P78363 | VRKLVKAWEEVGPQIWFYFDNSTQNMIRDTLGNPTVKDFL    |
| P78363 | KGPRESQADDMANFDWRDIFNITDRTLRLVNVQYLECLVLDK  |
| P78363 | WLPEYPCGNSTPWKTSPVSPNITQLFQKQKWTQVNPSPSCR   |
| P78363 | LPPPQRTQRSTEILQDLTDRNISDFLVKTYPALIRSSLKSK   |
| P78363 | VVPIITGEALVGFLSDLGRIMNVSGGPITREASKEIPDFLKH  |
| P78363 | SLPKDRSPEEYGITVISQPLNLTKQLSEITVLTTSVDAVV    |
| Q8N139 | LGRVDKFNSSSLMVVYTPISNLTQQIMNKALAPLLKGTSV    |
| Q8N139 | IMNKALAPLLKGTSVIGAPNKTHMDEILLENLPYAMGIIIF   |
| Q8N139 | FIKSLKHQNILLEVDDEFNRNGTDGLSYNGAIVSGKQKDY    |
| Q8IUA7 | LKGRITMGWPDEKSMDELNLNYSIDAVRVIFTDTFPHYHLKF  |
| Q8IUA7 | EKGFVAFQAAINAIIIEIATNHSVMEQLMSVTGVHMKILPF   |
| Q8IUA7 | FLHSLRRQNIATIEVDAFGTRNGTDDPSYNGAIVSGDEKDH   |

|        |                                            |
|--------|--------------------------------------------|
| 094911 | LGRVDTFNESRFSVVYTPVTNTTQQIMNKVASTPFLAGKEV  |
| 094911 | DLYLFSCIISFSSFIYYASVNVTRERKRMKALMTMMGLRDS  |
| 094911 | HDSFEQAPPEFQKKEAIRIRNVTKKEYKGPDKIEALKDLVF  |
| 094911 | PTKGSVTIYNNKLSEMALENLSKLTGVCQPSNVQDFLTV    |
| 094911 | FIQSVEHQNIALEVDAFGTRNGTDDPSYNGAITVCCNEKNY  |
| 095342 | VFIDYDVELQELQIPGKACVNNTIVWTNSSLNQNMNGTRC   |
| 095342 | ELQELQIPGKACVNNTIVWTNSSLNQNMNGTRCGLLNIES   |
| 095342 | IPGKACVNNTIVWTNSSLNQNMNGTRCGLLNIESEMIKFA   |
| 095342 | KACVNNTIVWTNSSLNQNMNGTRCGLLNIESEMIKFASY    |
| Q09427 | IDYWLAKWTDALVLSPAARNCSLSQECDLQSVYAMVFTL    |
| Q09429 | IDYWLAKWTDALVLSPAARNCSLSQECALQSVYAMVFTV    |
| Q9UNQ0 | YGFTALQHNEFLGQNFPCPLNATGNNPCNYATCTGEEYLK   |
| U6A629 | LPLLASYASAVTISVAKSGGNVTTGLQYGAMEEENHCGEG   |
| U6A629 | TYPNSLDAWSAVGGSTLSLQNLNPLSSALPTSVRITGKGT   |
| U6A629 | ANDWVQHEFTLTPKKKASSNNTFVLTFDASKASGSLDFN    |
| U6A629 | LRFPGGNNLEGQTIENRWKNETIGPLTQRPRATTWGYEE    |
| U6A629 | AKYGHKPKWTIRYVEVGNEDNLSSGLSSYSYRFQAFYDAI   |
| U6A629 | KSTSWHVYNNHMTNTPATSNDFGPPLCHRCE TAKTNSH    |
| U6A629 | LCHRCE TAKTNSHIFKAAVYNSTADVPSLTFEGVGRGTTA  |
| Q8NK89 | ISPLTAGGIADASAQDTFCANTCLITIIYDQSGNGHLTQ    |
| Q8NK89 | NAETSSDTGAGHMEAIYLGNSTTWGYGAGDGPWIMVDMEN   |
| U6BL29 | KRGSDGATTDIAPRHAGGVANATHQDTFCAGTTCLITIIYD  |
| U6BL29 | PNKWAIRGGNAASGPLSTFYNGSRPNARGYNPMSKEGAIIL  |
| U6BL29 | GSSISLRATTLCCTRYVAHNGSTVNTQVSSSSAALKQQ     |
| P42254 | LLSLVQNAHGISLKVSTQGGNSSPILYGFMFEDINHSGDG   |
| P42254 | STQGGNSSPILYGFMFEDINHSGDGGIYGQMLQNPGLQGT   |
| P42254 | GDGGIYGQMLQNPGLQGTAPNLTAWAAVGDATAIDGDSPL   |
| P42254 | HSSFWIKGDYSGDITVRLVGNITGTEYGSTTIHTSTADNF   |
| P42254 | GNYTGTEYGSTTIHTSTADNFTQASVKFPTTKAPDGNVLY   |
| P42254 | LRFPGGNNLEGNSAENRWKNETIGDLCDRPGREGTWTYYN   |
| P42254 | GDTSTTYGAWRAANGQEEPWNLTMVEIGNEDMLGGGCESYA  |
| P42254 | YHDYSTPDGLVGQFNYPDNLRVYPYFIEYSRWEIDWPNM    |
| P42254 | FERNSDVVKMAAYAPLLQLINSTQWTPDLIGYTQSPGDIFL  |
| P13689 | LMGSSSLKYPGQPQEI PFFQNTTFSIPVNDPHQVWNSDEHE |
| P11140 | VMIYDCTSAVAEATYWEIWDNGTI INPKSALVLSAESSSMG |
| P11140 | GGTLTVQTNEYLMRQGWRTGNNTS PFVTSISGYSDLQMQAQ |
| P38433 | PVGNLRFKKPKPKPWRI PLNATTPPNSCIQSEDYFGDFY   |
| P38433 | EPRDVALARAVILYNAMKCGNMSLINPDYDRILD CFQRADA |
| P38433 | VLHGVEINFI FGEPLNQKRFNYTDEERELSNRFMRYWANFA |
| P38433 | DGSFTQDVWPKYNSVSMYMNMTVESSY PSMKRIHGHPRRK  |
| Q9BYF1 | NHEAEDLFYQSSLASWNYNTNI TEENVQNMNAGDKWSAFL  |

|        |                                             |
|--------|---------------------------------------------|
| Q9BYF1 | SAFLKEQSTLAQMYPLQEIQNLTVKQLQALQQNGSSVLSE    |
| Q9BYF1 | YPLQEIQNLTVKQLQALQQNGSSVLSEDKSKRLNTILNTM    |
| Q9BYF1 | WDAQRIFKAEKFFVSVGLPNMTQGFWENSMLTDPGNVQKA    |
| Q9BYF1 | AATPKHLKSIGLLSPDFQEDNETEINFLKQALITVGTLPF    |
| Q9BYF1 | QEALCQAAKHEGPLHKCDISNSTEAGQKLFNMLRIGKSEPW   |
| Q9BYF1 | VRVANLKPRISFNFFVTAPKNVSDIIPRTEVEKAIRMSRSR   |
| P07140 | QERYEYFPGFSGEEIWNPNNTVSEDCLYINWAPAKARLRH    |
| P07140 | EHPNGKQADTDHLIHNGNFQNTNGLPLIWIYGGGFMGTGS    |
| P07140 | HMTSEKAVEIGKALINDCNCNASMLKTNPAHVMSCMRSVDA   |
| P07140 | GEWMGVLHGDEIEYFFGQPLNNSLQYRPFVERELGKRMLSAV  |
| P21836 | RRRATLLARLVGCPFGGAGGNDTELIACLRTSPAQDLVDHE   |
| P21836 | VVKDEGSYFLVYGVPGFSKDNESLISRAQFLAGVRIQVQPA   |
| P21836 | GVPHGYEIEBIFGLPLDPSLNYTTEERIFAQRLMKYWTNFA   |
| P04058 | PVGNMFRFRPEPKKPSWGVWNASTYPNNCQQYVDEQFPFGFS  |
| P04058 | GDHNVICPLMHFVNKYTKFGNGTYLYFFNHRASNLVWPEWM   |
| P04058 | GVIHGYEIEBFVGLPLVKELNYTAEELSRIMHYWATFA      |
| P04058 | HQRLRVQMCVFNQFLPKLLNATACDGEISSSGTSSSKGII    |
| P12821 | LLLLLPPQPALALDPGLQFGNFSADEAGAQLFAQSYNSSAE   |
| P12821 | LQPGNFSADEAGAQLFAQSYNSSAEQVLFQSVAAASWAHDTN  |
| P12821 | NSSAEQVLFQSVAAASWAHDTNITAEANARRQEEAALLSQEFA |
| P12821 | QEFAEAWGQKAKELYEPIWQNFDPQLRRIIGAVRTLGSAN    |
| P12821 | TLGSANLPLAKRQQYNALLSNMSRIYSTAKVCLPNKTATCW   |
| P12821 | YNALLSNMSRIYSTAKVCLPNKTATCWSLDPDLTNI LASSR  |
| P12821 | VFFPKPNLDVSTMLQQGWNATHMFRVAEEFFTSLELSPM     |
| P12821 | ALSVSTPEHLHKIGLLDRVTNDTESDINYLKMALEKIAFL    |
| P12821 | NFDWWYLRTKYQGICPPVTRNETHFDAGAKFHPNVTPYIR    |
| P12821 | DRTSQVVWNEYAEANWNYNTNITETSKILLQKNMQIANHT    |
| P12821 | NTNITETSKILLQKNMQIANHTLKYGTQARKFDVNQLQNT    |
| P12821 | ANHTLKYGTQARKFDVNQLQNTTIKRIIKKVQDLERAALPA   |
| P12821 | YNKILLDMETYSVATVCHPNGSCLQLEPDLTNVMATSRKY    |
| P12821 | KEADDFFTSLGLLPVPPPEFWNKSMLEKPTDGREVCHASAW   |
| P12821 | MKLGFSRPWPEAMQLITGQPNMSASAMLSYFKPLLDWL RTE  |
| P09470 | LQPGNFSDEAGAQLFAESYNSAEVVMFQSTVASWAHDTN     |
| P09470 | NSSAEVVMFQSTVASWAHDTNITEANARRQEEAALVSQEFA   |
| P09470 | QEFAEVWGKAKELYESIWQNFDSKLRRIIGSIRTLGPAN     |
| P09470 | TLGPANLPLAQRQQYNALLSNMSRIYSTGKVCFPNKTATCW   |
| P09470 | YNSLLSNMSRIYSTGKVCFPNKTATCWSLDPDLTNI LASSR  |
| P09470 | VFFPKPNLDVSTMVQKGNATHMFRVSEEFFTSGLGLSPM     |
| P09470 | NFDWWYLRTKYQGICPPVARNETHFDAGAKFHIPNVTPYIR   |
| P09470 | DRTAQVLLNEYAEANWQYNTNITIEGSKILLEKSTEVSNHT   |
| P09470 | NTNITIEGSKILLEKSTEVSNHTLKYGTRAKTFDVSNFQNS   |

|        |                                              |
|--------|----------------------------------------------|
| P09470 | SNHTLKYGTRAKTFDVSNFQNSSIKRIIKKLQNLDRVLP      |
| P09470 | YNQIILLDMETTYSLSNICYTNGTCMPLEPDLTNMMATSRKY   |
| P09470 | KEADNFFTSLGLLPVPEFWNKSMLEKPTDGREVVCHPSAW     |
| P09470 | MKLGYSKPWEAMKLI TGQPNMSASAMMNYFKPLTEWLVTE    |
| P54244 | IRTTIILFCVISVTTTSSQLNATLKT FDPRLN NSTADR DIA |
| P54244 | VTTTSQLNATLKT FDPRLN NSTADR DIAMKNVPLVRLTRH  |
| P54244 | MIQKWRDEYLDWNPNEYGMINSTIIPFHHLWI PD TYLYNSV  |
| P54244 | PAIYTTITCRLNIRFFPYDRQNCTLTISSWTNSKSALDYAD    |
| Q9N587 | YNNADGNYQVTIMTKAKLTYNGTVEWAPPATYKSMCQIDVE    |
| Q27218 | GCGAGGTWLGFLVFLAVSLRNHSTCEDIDAEDRLMVDLFRG    |
| Q27218 | EDRLMVDLFRGYNSLVQPVRNRSE LPMIVKIGMQLVLLINV   |
| Q27218 | VWLTMKWDDFQLKWDPRDYANI TQIRVAPEKVVLPDIVLNF   |
| P04756 | PAIFKSYCEIIVTHFPFDEQNCMKGITWYDGSVVAINPE      |
| P02710 | PAIFKSYCEIIVTHFPFDQNCMTKLGITWYDGTKVSISPE     |
| P02712 | SAIYRSSCTIKVMYFPFDWQNCMTMVFKSYTYDTSEVTLQHA   |
| P02718 | ETLTSNVWMDHAWYDHRLTNWASEYSDISILRPLPELVWIP    |
| P02718 | PAIFRSSCPINVLVYFPFDWQNC SLKFTALNYDANEITMDLM  |
| P02718 | GEWEI IHKPAKKNIPDKFPNGTNYQDVTFYLIIRKPLFY     |
| Q16570 | STENSSQLDFEDVWNSYGVNSDFPDGDYGANLEAAAPCHS     |
| Q9U7D5 | NADDPRFRQTHLFQMLVKVINTSAENATKTAIATSSTSTPS    |
| Q9U7D5 | RFRQTHLFQMLVKVINTSAENATKTAIATSSTSTPSFVDY     |
| Q18581 | ASNKTNGPVPFANPVAQALVNSSNYWKTDNLQAPGSIKDEE    |
| Q18581 | NDRWWEIRNKYEGVRSQPYNLSDALIHNSVSVQVHSPAT      |
| Q23534 | HTQLISVHVI FRHGARAPVLNVTSEEAKSYFYRGLGQLTDE   |
| Q23534 | FLLVPKLDCDFQLGEWDNYFNLTESDKKMARKNPWFVSDKA    |
| P45963 | NGFTVEGSKKEAQLYRDLLTNYSYLVRPVRNPKKALVTMK     |
| P45963 | AWLKYIWTDFRLRWNPLDYENITSVRFQGEDQIWQPDILLY    |
| P08001 | PRTSPTLQEARVALIDLELCNSTRWYNGRIRSTNV CAGYPR   |
| Q9GL10 | RRTS PMLQEARVDLIDLGLCNSTRWYNGRIRSTNV CAGYPE  |
| Q14672 | SSHVKAIDTIYQTTDFSGIRNISFMVKRIRINTTAD EKDPT   |
| Q14672 | QTTDFSGIRNISFMVKRIRINTTAD EKDPTNFRFPNIGVE    |
| Q14672 | ARATSGDKLNNKFS LCSIRNISQVLEKRRNCFVESGQPI     |
| Q14672 | AREGICNGFTALCPASDPKNFTDCNRHTQVCINGQCAGSI     |
| Q35598 | SSHVKAIDTIYQTTDFSGIRNISFMVKRIRINTT SDEKDPT   |
| Q35598 | QTTDFSGIRNISFMVKRIRINTT SDEKDPTNFRFPNIGVE    |
| Q35598 | ARATSGDKLNNKFS LCSIRNISQVLEKRRNCFVESGQPI     |
| Q35598 | AKEGICNGFTALCPASDPKNFTDCNRHTQVCINGQCAGSI     |
| Q9P0K1 | HGLHGMFYDGNHTYLI EPEENDTTQEDFHHSVYKSRLFEEF   |
| Q9P0K1 | MGTVCREAVNDCDIRETCSGNSSQCAPNIHKMDGYSCDGVQ    |
| Q9P0K1 | LGELDGEITSTLVVQQGRTLNC SGGHVKLEEDVDLGYVEDG   |
| Q9P0K1 | TPCGPQMMCLEHRCLPVASFNFSTCLSSKEGTICSGNGVCS    |

|        |                                            |
|--------|--------------------------------------------|
| Q9BZ11 | APGYIETHYGPDGQPVVLPAPNHTDHCYQGRVRFPPDSWVV  |
| Q9BZ11 | DSWVVLCTCSGMSGLITLSRNASYLWRPWPGRGSKDFSTHE  |
| Q9BZ11 | YLELYIVADHTLFLTRHRNLNHTKQRLLLEVANYVDQLLRTL |
| Q9BZ11 | ALTGLEVWTERDRSRVTQDANATLWAFLOQWRRGLWAQRPHD |
| Q9BZ11 | GEECDGPGQECDLCCFAHNCSLRPGAQCAHGDCCVRCLL    |
| O15204 | LHEIVCPKKLHILHKREIKNNQTEKHGKEERYEPEVQYQMI  |
| O15204 | STDEKEHAVFTSNQEEQDPANHTCGVKSTDGKQGPRIISRS  |
| O15204 | QKYIDLVLVLDNAFYKNYNENLTLRSFVFDVMNLLNVIYN   |
| Q8R2Z0 | AGARQELKKSRLFARVDSPNITTSNREGFPGSVKPPPEASG  |
| Q86S40 | IGFNCNVDLIVSGVRVVDALNTTCSSEGKQETLETLADLHQ  |
| Q86S40 | LVGPIGPRSQLLHPSVKRTNSTRILKDELHVILEYKQGEI   |
| Q8IUX7 | LSELEPEVVARFIRIYPLTWNGSLCMRLEVLGCSVAPVYSY  |
| Q8IUX7 | EQVHRGKGVVTDEQGIPIANATISVSGINHGVKTASGGDY   |
| P43652 | LFFLTESLTLPTQPRDIENFNSTQKFIEDNIEYITIIAFAQ  |
| P43652 | LPNNVLQEKICAMEGLPQKHNFSHCCSKVDAQRRLCFFYNK  |
| P43652 | PDLSEPELLRIVQIYKDLRNCNTENPPGCYRYAEDKFNE    |
| P43652 | RNCCNTENPPGCYRYAEDKFNETTEKSLKMWQOECKHFQNL  |
| P43652 | FACVDNLADLVFGEELCGVNRNTINPAVDHCCKTNFAFRFP  |
| O89020 | LLPLTESLALPTKPDVDHFNATQKFIDENTTYLAI IAFSQ  |
| O89020 | TANDAIQDMLCDMEGLPQKHNFSHCCGKAGFRRLCFFYNK   |
| O89020 | VGFLPPFPTLDPEEKQAYKNNSESLHLYMYEVARRNPFV    |
| O89020 | EDCCSRENPAFCYRHVEDKFNETTQRSLAMVQOECKQFQEL  |
| O89020 | FACVDNLADLVGELCGVNRNTINPAVDHCCKTDFAFRRH    |
| P06280 | QLANYVHSGKLGKGIYADVGNKTCAGFPGSFGYYDIDAQTF  |
| P06280 | CYCDLENLADGYKHMSLALNRTGRSIVYSCEWPLYMWPFO   |
| P06280 | GRSIVYSCEWPLYMWPFOKPNYTEIRQYCNHWRNFADIDDS  |
| P06280 | LPVVRKLGFEWTSRLRSHINFTGTVLLQLENTMQMSLKDL   |
| P06750 | SGWSFTLEDNNIFPKQYPIINFTTADATVESYTNFIRAVRS  |
| P06750 | TAIQESNQAFASPIQLQRRNGSKFNVDVSILIPITIALMV   |
| P06750 | VVIYNCSTATVGATRWQIWDNRTIINPRSGLVLAATSGNSG  |
| P06750 | GTKLTVQTNIIYAVSQGWLPNTTQPFVTTIVGLYGMCLQAN  |
| P56526 | EYQSDRLNIQILPHTVDSTNASWYFLSENLVPRPKASLNA   |
| P56526 | TNASWYFLSENLVPRPKASLNASVSQSDLFVSWSNPEPSFNF |
| P56526 | EYNLYGLGEHITQFRLQRNANLTIYPSDDGTFIDQNLGQH   |
| P56526 | LPAMQQYNTLGFHQCRWGYNNWSDLADVVANFEKFEIPLY   |
| P56526 | ESGRYYVPIVDAALYIPNPENASDAYATYDRGAADDVFLKN  |
| P56526 | GVWYDMSEVSSFCVSGGTGNLTLNPAHPSFLLPGEPGDII   |
| P56526 | PSFLLPGEPGDIIYDYPEAFNITNATEAASASAGASSQAAA  |
| P56526 | LLPGEPGDIIYDYPEAFNITNATEAASASAGASSQAAATAT  |
| P56526 | PYVINHDQEGHDLVHAVSPNATHVDGVEEYDVHGLYGHQG   |
| P56526 | THVDGVEEYDVHGLYGHQGLNATYQGLLEVWSHKRRPFIIG  |

|        |                                             |
|--------|---------------------------------------------|
| P56526 | HGEVWYDWYQTAAVDAKPGVNTTISAPLGHIPVYVRGGNII   |
| P56526 | ALTTREARQTPWALLAALGSNGTASGQLYLDGGEIYPNAT    |
| P56526 | GSNGTASGQLYLDGGEIYPNATLHVDF TASRSSLRSSAQG   |
| P56526 | KEPSAVTLNGQAVFPGSVTYNSTSQVLFVGGLOLTKGGAW    |
| O60242 | STLVKGVYIGSYSVSEMFPKNFTNCTWTLENPDPTKYSIYL   |
| O60242 | VKGVYIGSYSVSEMFPKNFTNCTWTLENPDPTKYSIYLKFS   |
| O60242 | PDPTKYSIYLKFSKDLSCSNFSLAYQFDHFSHEKIKDLL     |
| O60242 | LLAYQFDHFSHEKIKDLLRKNHSMQLCNSKNAFVFLQYDK    |
| O60242 | PLNEQTEGCLTQELQTTQVCNLTREAKRPPKEEFMMGDHT    |
| O60242 | TCVSPYGTCHSGPLRESRVCNNTALCPVHGVWEEWSPWLC    |
| O60242 | PVDGQWQEWSSWSQCSVTCNSGTQQRSRQCTAAAHGGSECR   |
| O60242 | MSMVWKRTPAGDLAFNQCPLNATGTTSRRCSLSLHGVAFWE   |
| O60242 | LTQRKNFYAGDLLMSVEILRNVTDTFKRASYIPASDGVQNF   |
| O60242 | VFVLGAVLYKNLDLILPTLRNYTVINSKIIVVTIRPEPKTT   |
| O60242 | IRPEPKTTDSFLEIELAHLANGTLNPHYCVLWDDSKTNEISLG |
| O60242 | AHLANGTLNPHYCVLWDDSKTNEISLGTWSTQGCKTVLTDASH |
| O60242 | FCLSISSNILILVGQTQTHNKSICTTTTAFHLHFFFLASFC   |
| Q8IZF2 | VATKSPTAEYTVNIEISFENASFLDPIKAYLNSLSFPPIHG   |
| Q8IZF2 | ASFLDPIKAYLNSLSFPPIHGNNTDQITDILSINVTTVCRPA  |
| Q8IZF2 | LSLFPPIHGNNTDQITDILSINVTTVCRPAGNEIWCSCETGY  |
| Q8IZF2 | EDVTLMRVRNLNVGFQEDLMNTSSALYRSYKTDLETAFRKG   |
| Q8IZF2 | TTPPSLELIHKANEQVVQSLNQTYKMDYNSFQAVTINESNF   |
| Q8IZF2 | VQSLNQTYKMDYNSFQAVTINESNFFVTPEIIFEGDTVSLV   |
| Q8IZF2 | EIIFEGDTVSLVCEKEVLSSNVSWRYEEQQLEIQNSSRFSI   |
| Q8IZF2 | KEVLSSNVSWRYEEQQLEIQNSSRFSIYALFNMTSVSKL     |
| Q8IZF2 | EQQLEIQNSSRFSIYALFNMTSVSKLTIHNITPGDAGEY     |
| Q8IZF2 | MKVMCDNNFVSLNCCSQGNVNSKVEWKQEGKINIPGTPET    |
| Q8IZF2 | ISAYGARGSANIKVTFISVANLITPDPISVSEGNFISIKC    |
| Q8IZF2 | FISVANLITPDPISVSEGNFISIKCISDVSNYDEVYWNST    |
| Q8IZF2 | GQNFISIKCISDVSNYDEVYWNSTAGIKIYQRFYTRRYLDG   |
| Q8IZF2 | RRYLDGAESVLTVKTSTREWNGTYHCIFRYKNSYSIATKDV   |
| Q8IZF2 | SSLPAAKEVNNKQVCYKHNFNASSVWSCSKTVDVCCHTNA    |
| Q8IZF2 | SSVWSCSKTVDVCCHTNAANNSVWSPSMKLNLPGENITC     |
| Q8IZF2 | NAANNSVWSPSMKLNLPGENITCQDPVIGVGEKVIQKL      |
| Q8IZF2 | NVILGKPVLNTWKVLQQQWTNQSSQLLHVSVERFSQALQSGD  |
| Q8IZF2 | QDIQENNAESLVMTTTVSHNTMPFRISMFTKNNSPSGGE     |
| Q8IZF2 | KNNSPSGGETKCVFNNFRLANNTGGWDSGCVVEEGDGNV     |
| Q8IZF2 | ANNTGGWDSGCVVEEGDGNVTCICDHLTSFSLMSPDSP      |
| O00468 | FFVNPAPPYLWPAHKNEIMLNSLMRITLRNLEEVEFCVED    |
| O00468 | QQRRIRLLSRGPCGSRDPCSNVTCISFGSTCARSADGLTASC  |
| O00468 | PLPPVAPLHCAQTPYGCCQDNITAAARGVGLAGCPSACQCNP  |

|        |                                            |
|--------|--------------------------------------------|
| O00468 | CVESGSAHCVCPLMTCPEANATKVCGSDGVTYGNECQLKT   |
| Q80TR1 | MENVQCYLPDAFKIMSQRCCNNRTQCVVAGSDAFDPDPCPGT |
| Q80TR1 | ASFQCLPALGLWNPRGPDLSNCTS PWVNQVAQKIKSGENAA |
| Q80TR1 | VVETVDNLLRPEALESWKDMNATEQVHTATMLLDVLEEGAF  |
| Q80TR1 | GVVKVVFILYNNLGLFLSTENATVKLAGEAGTGGPGGASLV  |
| Q80TR1 | LMDPVI FTVAHLEAKNHFNANCSFWNYSERSMLGYWSTQGC |
| Q80TR1 | IFTVAHLEAKNHFNANCSFWNYSERSMLGYWSTQGCRLVES  |
| Q80TR1 | YSERSMLGYWSTQGCRLVESNKHTTTCACSHLTNFAVLMHA  |
| O88917 | MENVQCYLPDAFKIMSQRCCNNRTQCVVAGSDAFDPDPCPGT |
| O88917 | ASFQCLPALGLWNPRGPDLSNCTS PWVNQVAQKIKSGENAA |
| O88917 | VVETVDNLLRPEALESWKDMNATEQVHTATMLLDVLEEGAF  |
| O88917 | GVVKVVFILYNNLGLFLSTENATVKLAGEAGTGGPGGASLV  |
| O88917 | LMDPVI FTVAHLEAKNHFNANCSFWNYSERSMLGYWSTQGC |
| O88917 | IFTVAHLEAKNHFNANCSFWNYSERSMLGYWSTQGCRLVES  |
| O88917 | YSERSMLGYWSTQGCRLVESNKHTTTCACSHLTNFAVLMHA  |
| O95490 | MENTDCYLPDAFKIMTQRCCNNRTQCVVAGSDVFPDPCPGT  |
| O95490 | ASNAFMICGVLYVVRVSVYQDNESETGKNSIDYIYNTRLNRG |
| O95490 | ASYLCMISTGTWNPKGPDLSNCTSHWVNQLAQKIRSGENAA  |
| O95490 | IVDTVNDLLRPEALESWKHMNSSEQAHTATMLLDVLEEGAF  |
| O95490 | GLAKLVFIYRSLGQFLSTENATIKLGADFIGRNSTIAVNS   |
| O95490 | GQFLSTENATIKLGADFIGRNSTIAVNSHVISVSINKESSR  |
| O95490 | LTDVFLFTLPHIDPDNYFNANCSFWNYSERTMMGYWSTQGC  |
| O95490 | LFTLPHIDPDNYFNANCSFWNYSERTMMGYWSTQGCKLVDT  |
| O95490 | YSERTMMGYWSTQGCKLVDTNKTRTTCACSHLTNFAVLMHA  |
| Q8JZZ7 | MENTDCYLPDAFKIMTQRCCNNRTQCVVAGSDVFPDPCPGT  |
| Q8JZZ7 | ASYLCMASTGTWNPKGPDLSNCTSHWVNQLAQKIRSGENAA  |
| Q8JZZ7 | GLAKLVFIYRSLGQFLSTENATIKLGADLMGRNSTIAVNS   |
| Q80TS3 | MENIRCYLPDAYKIMSQRCCNNRTQCAVVAGPDVFPDPCPGT |
| Q80TS3 | LRTTWNIGRSTTASLPGRNRSTSTPSPAVEVLDVTHL      |
| Q80TS3 | STYLCLAPDGIWDPQGPDLSCSSPWVNHITQKLSGETAA    |
| Q80TS3 | GEIRVAVFLYNNLGPYLSTENASMKLGTEAMSTNHSVIVNS  |
| Q80TS3 | GPYLSTENASMKLGTEAMSTNHSVIVNSPVITAAINKEFSN  |
| Q80TS3 | ADPVVFTVKHIKQSEENFNPNCSFWSYSKRTMTGYWSTQGC  |
| Q80TS3 | YSKRTMTGYWSTQGCRLLTNKNHTTTCSCNHLTNFAVLMHA  |
| Q80TS3 | IHKNLCSLFAELFLIGINRTDQPIACAVFAALLHFFFL     |
| Q80TS3 | GAIALLCLLGLTWAFGLMYINESTVIMAYLFTIFNSLQGMF  |
| Q9HBW9 | CNMGFSGNGVTICEDDNECGNLTQSCGENANCTNTEGSYYC  |
| Q9HBW9 | TICEDDNECGNLTQSCGENANCTNTEGSYYCMCVPGFRSSS  |
| Q9HBW9 | CIENVNANCHLDNVCIAANINKLTKIRSIKEPVALLQEVY   |
| Q9HBW9 | TDIITYIEILAESSLLGYKNNTISAKDTLSNSTLTFVKT    |
| Q9HBW9 | ESSLLGYKNNTISAKDTLSNSTLTFVKT VNNFVQRDTFV   |

|        |                                             |
|--------|---------------------------------------------|
| Q9HBW9 | VEQATLRISQSFQKTTEFDTNSTDIALKVFFFDSDYNMKHIH  |
| Q9HBW9 | KVTDYRSLCAFWNYSPTDMNGSWSSEGCELTYSNETHTSC    |
| Q9HBW9 | YSPDTMNGSWSSEGCELTYSNETHTSCRCNHLTHFAILMSS   |
| P30556 | AGLASLPAAIHRNVFFIENTNITVCAFHYESQNSTLPIGLG   |
| P30556 | NVFFIENTNITVCAFHYESQNSTLPIGLGLTKNIGLFLFPF   |
| P51635 | ASSVLLHTGQKMPILGLGTWKSEPGQVKAAYALSVMGYRH    |
| P51635 | SVYGNETEIGEALKESVAGKAVPREELFVTSKLWNTKHHHP   |
| P51635 | GAGKAVPREELFVTSKLWNTKHHHPEDVEFAVRKTLADLQLE  |
| P51635 | GDNPFPPKADGTVKYDSTHYKETWKALEALVAKGLVKALGL   |
| P51635 | VKYDSTHYKETWKALEALVAKGLVKALGLSNFSSRQIDDLV   |
| B2VPR8 | AIKSIKIPDDNTKRVILSFSFGNYSEKVKIGMYKHYITFYGED |
| D8VPP5 | AIKSIKIPDDNTKRVILSLAPGNYSEKVKIGMYKHYITFYGED |
| P02768 | AYSRGVFRRDHAKSEVAHRFKDLGEEFNKALVLIIFAQYLO   |
| P02768 | LQQCPFEDHVKLVNEVTEFAKTCVADESAENCDKSLHTLFG   |
| P02768 | RPEVDVMCTAFHDNEETFLLKLYLIEIARRHPYFYAPELFF   |
| P02768 | IARRHPYFYAPELFFAKRYKAAFTECCQAADKAACLLPKL    |
| P02768 | LPKLELDRDEGKASSAKQRLKASLQKFGERAFAKAWAVARL   |
| P02768 | KFGERAFAKAWAVARLSQRFPKAEFAEVSKLVTDLTKVHTEC  |
| P02768 | AWAVARLSQRFPKAEFAEVSKLVTDLTKVHTECCHGDLLEC   |
| P02768 | DRADLAKYICENQDSISSKLEKCEKPLEKSHCIAEVEND     |
| P02768 | AKYICENQDSISSKLEKCEKPLEKSHCIAEVENDEMPAD     |
| P02768 | VENDEMPADLPSLAADFVESKDVCCKNYAEAKDVFLGMFLYE  |
| P02768 | EMPADLPSLAADFVESKDVCCKNYAEAKDVFLGMFLYFYARR  |
| P02768 | MPADLPSLAADFVESKDVCCKNYAEAKDVFLGMFLYFYARRH  |
| P02768 | PSLAADFVESKDVCCKNYAEAKDVFLGMFLYFYARRHPDYSV  |
| P02768 | LYEYARRHPDYSVVLRLAKTYETTLEKCCAAADPHECYA     |
| P02768 | EKCCAAADPHECYAKVFDEFKPLVEEPQNLIKQNCLEFQQL   |
| P02768 | ELFEQLGELYKFNALLVRYTKKVPQVSTPTLVEVSRNLGKV   |
| P02768 | STPTLVEVSRNLGKVGSKCKHPEAKRMPCAEDYLSVVLNQ    |
| P02768 | VEVSRNLGKVGSKCKHPEAKRMPCAEDYLSVVLNQLCVLH    |
| P02768 | TKCCTESLVNRRPCFSALEVDETYVPKEFNAETFTFHADIC   |
| P02768 | ETFTFHADICTLSEKERQIKKQTALVELVKHKPKATKEQLK   |
| P02768 | CTLSEKERQIKKQTALVELVKHKPKATKEQLKAVMDDFAAF   |
| P02768 | LSEKERQIKKQTALVELVKHKPKATKEQLKAVMDDFAAFVE   |
| P02768 | KQTALVELVKHKPKATKEQLKAVMDDFAAFVEKCKADDKE    |
| Q23361 | NACAQTGVNRFHINDAWTYNKTENLKPADLENFDFLVLGT    |
| P43237 | TARLKEGDVFIIPAAHPVAINASSELHLLGFGINAENNHRI   |
| P43238 | TARLKEGDVFIIPAAHPVAINASSELHLLGFGINAENNHRI   |
| P19963 | NEIPTEGWAKPSLKFKNLTVNGTTRTVNPLGFFKKEALPKC   |
| P81943 | GATLGEVYXIIYARVLWVGNTTQKLEWIRSLHDYQSSFFP    |
| Q01594 | QAKMTWTMKAEEAEAVANINCSEHGRAFLDGIISEGSPKC    |



|        |                                             |
|--------|---------------------------------------------|
| Q01594 | IVFGVGTQLIHGLVLSLSPNMTATPDAPESKVVAHAPFYP    |
| Q01594 | QTKYFNKKGYVWAGNAANYVNVSNPEQYIEMVTS PNNPEGL  |
| Q01594 | KGTMRDLNTFGFKLRERWVNITALLDQSDRFSYQELPQSE    |
| P35858 | ACVCSYDDDADELSVFCSSRNLTRLPDGVPGGTQALWLDGN   |
| P35858 | LTRL PDGVPGGTQALWLDGNNLSSVPPAAFQNLSSLGFLNL  |
| P35858 | TQALWLDGNNLSSVPPAAFQNLSSLGFLNLQGGQLGSLEPQ   |
| P35858 | NQLQEVKAGAFGLTNAVVMNLSGNCLRNLPEQVFRGLGKL    |
| P35858 | EALPNSLLAPLGRRLRYLSLRNNSLRTFTFP PGLERLWLEG  |
| P35858 | RFVQAI CEGDDCQPPAYTYNNITCASPPVVGDLDRDLSEA   |
| B6KAM0 | STSGNPFQANVEMKTFMERFNLTHHHQSGIYVDLQDKEVD    |
| P00978 | SGTYEKTSADGKFLYHKAKWNITMESYVVHTNYDEYAI FLT  |
| P00978 | ARRAVLTQEEEGSGAGQPVTNFSKKADSCQLDYSQG PCLGL  |
| P00978 | SCQLDYSQGPCLGLFKRYFYNGTSMACETFQYGGCMGN GN   |
| P02760 | AVSAGPVPTPPDNIQVQENFNISRIYGKWNLAIGSTCPWL    |
| P02760 | SGAYEKTDTDGKFLYHKS KWNITMESYVVHTNYDEYAI FLT |
| P02760 | SCQLGYSAGPCMGMTSRYFYNGTSMACETFQYGGCMGN GN   |
| P04366 | SGAYEKSTDGKFLYHKS KWNITMESYVVHTNYDEYAI FLT  |
| P04366 | SCQLGYSQGPCLGMIKRYFYNGSSMACETFHYGGCMGN GN   |
| P83388 | AVMLFVSGTPIPPQLPAFQNNITCMFESSTPIHPFAFRHT    |
| P83388 | LMIGSGDQMSASCRFDSMDKNRTVNMGAMGVDEMCNFYMMF   |
| P83388 | ILLDKKPIADPVILVISYSGNQTKLERKLGQQFYLP HGIY   |
| P14925 | FAVNGKPYFGDQEPVQGFVMNFSSGEIIDVFKPVRKHF DMP  |
| Q80ZD8 | LPNVQSLPSY TALDLSHNNLSRLRAEWTPTRLTNLHSL L   |
| Q80ZD8 | EDLYCMHSKLHNIFSLDFFNCSEYKESAWEAHLGDTL TIR   |
| Q80ZD8 | QGMTKVWVSPSNEQVLSQSGNSGVSVRNGDLFFKKVQV EDG  |
| Q80ZD8 | KKVQVEDGGVYTCYAMGETFNETLSVELKVYNFTLHG HHT   |
| Q80ZD8 | TCYAMGETFNETLSVELKVYNFTLHGHTLNTAYTTLVGC     |
| Q43077 | AIKPLKYPPFIDSVKRGLNLSEIVCSSFTMGWFG EEKV     |
| Q43077 | ICVFEQYGNIMWRHTENGIPNESIEESRTEVNLIVRTI VTV  |
| Q43077 | DDYPQIRGAFTNYNVVVTAYNRTEKWAGGLYVDHSR GDDTL  |
| P12807 | FYPKHMIEKVGAMRPEAPPINVTQPEGVSFKMTGNVME WSN  |
| Q07075 | LHVKPLEEDTYTGTVSI SINLSAPTRYLWLHLRETR ITRL  |
| Q07075 | LTPSSGDGLYLLTMEFAGWLNGLVGFYRTTYTENGQVK SI   |
| Q07075 | GKPLTIYVQPEQKHTA EYAANITKSVFDYFEEYFAMNYS LP |
| Q07075 | EYAANITKSVFDYFEEYFAMNYS LPKLDKIAIPDFGTG AME |
| Q07075 | VMDTWTRQMGYPVLNVGVKNI TQKRFLLDPRANPSQPP SD  |
| Q07075 | SQPPSDLGYTWNIPVKWTE DNITSSVLFNRSEKEGITL NS  |
| Q07075 | YTWNIPVKWTE DNITSSVLFNRSEKEGITLNSNPSGNA FL  |
| Q07075 | EDNITSSVLFNRSEKEGITLNSNPSGNAFLKINPDHIG FY   |
| Q07075 | ITSSVLFNRSEKEGITLNSNPSGNAFLKINPDHIGFYRV N   |
| Q07075 | LIDDAFALARAQLLDYKVALNLT KYLKREENFLPWQRVISA  |

|        |                                              |
|--------|----------------------------------------------|
| Q07075 | LLRSSVLGFACKMGDREALNASSLFEQWLNGTVSLPVNLR     |
| Q07075 | CKMGDREALNASSLFEQWLNGTVSLPVNLRLLVYRYGMQN     |
| Q07075 | NLRLLVYRYGMQNSGNEISWNYTLEQYQKTSLAQEKEKLLY    |
| Q07075 | QKTSLAQEKEKLLYGLASVKNVTLRSYLDLLKDTNLIKTO     |
| P15144 | TVRFTCKEATDVIIHHSKKNYTL SQGHRVVLRGVGGSQPP    |
| P15144 | AADARKSFPCFDEPAMKAEFNITLIHPKDLTALS NMLPKGP   |
| P15144 | ALS NMLPKGPSTPLPEDPNWVTEFH TTPKMSTYLLAFIVS   |
| P15144 | LIRIWARPSAIAAGHG DYALNVTGPILNFFAGHYDTPYFLP   |
| P15144 | FAYQNTIYLNLDH LQEA VNNRSIQLPTTVR DIMNRWTLQM  |
| P15144 | TVDTSTGTL SQEHFLDPDSNVTRPSEFN YVWVPI TSI RD  |
| P15144 | VRAQNDFSTSGNEWVLLN LNVTGYRVNYDEENWRKIQTQ     |
| P15144 | IINDAFNLASAHKVPVTLALNNTFLIEERQYMPWEAALSS     |
| P15144 | YGP MKNYLKKQVTP LFIHFRNNTNNWREIPENLMDQYSEVN  |
| P15144 | CNAIAQGGE EWDFAWEQFRNATLVNEADKLRAALACSKEL    |
| P97449 | RVILRPYLTPNNQGLYIFQGNSTVRFTCNQTTDVIIHHSK     |
| P97449 | TPNNQGLYIFQGNSTVRFTCNQTTDVIIHHSKKNYTLKGN     |
| P97449 | TVRFTCNQTTDVIIHHSKKNYTLKGNHRVVLRTLDGTPAP     |
| P97449 | AADARKSFPCFDEPAMKAMFNITLIYPNNLIALSNMLPKES    |
| P97449 | FHSTPKMSTYLLAYIVSEFKNISSVSANGVQIGIWARPSAI    |
| P97449 | QIGIWARPSAIDEGQGDYALNVTGPILNFFAQHYNTSYFLP    |
| P97449 | QGDYALNVTGPILNFFAQHYNTSYPLPKSDQIALPDFNAGA    |
| P97449 | TVNTNTGEISQKHFLD SKSNVTRPSEFN YIWIAP I PFLKS |
| P97449 | APIPFLKSGQEDHYWLDVEKNQSAKFQTS SNEWI LLNINVT  |
| P97449 | EKNQSAKFQTS SNEWI LLNINVTGYLVNYDENNWKQLNQ    |
| P97449 | QTDLSVIPVINRAQIIHDSFN LASAKMIPITLALDNTLFLV   |
| P97449 | YGP MCRYLKKQVTP LFFYFQNR TNWVNR PPTLMEQYNEIN |
| P97449 | GLKECRDLVVELYSQWMKNPNNNTIHPNLRSTVYCNAIAFG    |
| P97449 | LKECRDLVVELYSQWMKNPNNNTIHPNLRSTVYCNAIAFGG    |
| P97449 | KECRDLVVELYSQWMKNPNNNTIHPNLRSTVYCNAIAFGGE    |
| P97449 | LVVELYSQWMKNPNNNTIHPNLRSTVYCNAIAFGGEEWNF     |
| P97449 | CNAIAFGGEEWNF AWEQFRNATLVNEADKLRSALACSKDV    |
| P15145 | DQSKPWNRYRLPTTL PDSYNVTLR PYLTPNADGLYIFK GK  |
| P15145 | IVRLLCQEPTDVIIHHSKKNYTTQGHMVVLRGVGD SQVPE    |
| P15145 | STDARKSFPCFDEPAMKATFNITLIHPNNLTALS NMPPKGS   |
| P15145 | PCFDEPAMKATFNITLIHPNNLTALS NMPPKGSSTPLAEDP   |
| P15145 | LTALS NMPPKGSSTPLAEDPNWSVTEFETTPVMSTYLLAYI   |
| P15145 | TTPVMSTYLLAYIVSEFQSVNETA QNGVLIRIWARPNIAE    |
| P15145 | LIRIWARPNIAE GHGMYALNVTGPILNFFANHYNTSYFLP    |
| P15145 | HGMYALNVTGPILNFFANHYNTSYPLPKSDQIALPDFNAGA    |
| P15145 | LTEDLFKEGLASYLHAFAYQNTTYLDLWEHLQKAVDAQTSI    |
| P15145 | MDRWTLQMGFPVITVDTKTGNI SQKHFLDSESNVTRSSAF    |

|        |                                            |
|--------|--------------------------------------------|
| P15145 | TVDTKTGNISQKHFLLDSESNVTRSSAFDYLVIVPISSIKN  |
| P15145 | SQAQNDLFKTASDDWVLLNVNVTGYFQVNYDEDNWRMIQHQ  |
| P15145 | YFQVNYDEDNWRMIQHQLQTNLSVIPVINRAQVIYDSFNLA  |
| P15145 | KKYLRKQVEPLFQHFETLTKNWTERRPENLMDQYSEINAIST |
| P85073 | EWEKFKTKHITSQSVADFNCNRTMNDPAYTPDGQCKPINTF  |
| P85073 | FIHSTTGPVKEICRRATGRVKNSSSTQQFTLTTCKNPIRCKY |
| P85073 | TQQFTLTTCKNPIRCKYSQSNTNFICITCRDNYPVHFVKT   |
| P30533 | TEAEFEPRVIDLWDLAQSANLTDKELEAFREELKHFEAKI   |
| P04745 | RNMVNFNRVVDGQPFNTWYDNGSNQVAFGRGNRGFIVFNND  |
| P04745 | QTGLPAGTYCDVISGDKINGNCTGIKIYVSDDGKAHFSISN  |
| P0C1B3 | DTTKDVVKNNEWYDWVGSLSVNSYIDGLRIDTVKHVQKDFWP |
| P69327 | ATDIVWPLVRNDLSYVAQYWNQTYDYLWEEVNGSSFFFTIAV |
| P69327 | DAVKTFADGFVSIIVETHAASNGSMSEQYDKSDGELSARDL  |
| P69328 | ATDIVWPLVRNDLSYVAQYWNQTYDYLWEEVNGSSFFFTIAV |
| P69328 | DAVKTFADGFVSIIVETHAASNGSMSEQYDKSDGELSARDL  |
| P04746 | QTGLPAGTYCDVISGDKINGNCTGIKIYVSDDGKAHFSISN  |
| P00690 | RNMVWFRNVVDGQPFANWANGSNQVAFGRGNRGFIVFNND   |
| P54802 | VLPFAFAGHVPEAVTRVFPQVNVTKMGSWGHFNCSYSCSFL  |
| P54802 | AVTRVFPQVNVTKMGSWGHFNCSYSCSFLAPEDPIFPIIG   |
| P54802 | GLFGALEAVNGGPEARLFPNSTMVGTMPEGISQNEVVY     |
| P54802 | YGVSHPDAGAARLLRSVYNCSGEACRGNRSPLVRRPSL     |
| P54802 | GEACRGNRSPLVRRPSLQMNNTSIWYNRSDVFEAWRLLLTS  |
| P54802 | HNRSPLVRRPSLQMNNTSIWYNRSDVFEAWRLLLSAPSAT   |
| P80929 | YDPSPTGHDDRYCNTMMERRNMTRPCKDNTTFIHGNSDDIR  |
| Q9Y5C1 | EEKELRRTTYKLQVKNEEVKNMSLELNSKLESLEEKILLQ   |
| Q9Y5C1 | VISGSPWTLIQHRIDGSQNFNETWENYKYGFGRLDGEFWLG  |
| Q9Y5C1 | DWKDNKHYIEYSFYLGHNHETNYTLHLVAITGNVPNAIPENK |
| Q8NI99 | FTGAVCWSGPASTRATPEANASELAALRMRVGRHEELLRE   |
| Q8NI99 | GADLGAEPAAALALGERVLNASAEQAARAFHQLDVKFR     |
| P01019 | WAGLAAGDRVYIHPFHLVIHNESTCEQLAKANAGPKDPTF   |
| P01019 | ALDHTADRLQAILGVPWKDKNCTSRDLDAHKVLSALQAVQGL |
| P01019 | FQGMKGFSLLAEPQEFWVDNSTSVSVPMLSGMGTQHWSD    |
| P01019 | VSVPMLSGMGTQHWSDIQDNFSVTQVPFTESACLLLIQPH   |
| Q6IWH7 | DFLPRAYYRWTRAHDLRGFLNFTLARAPSSFAAAHNRTCRY  |
| Q6IWH7 | LRGFLNFTLARAPSSFAAAHNRTCRYAFRDDDGHSQTYW    |
| Q4KMQ2 | LLAAVVGACFLYGYLNQDNCTWSKEVCHPDIGGKIIMCP    |
| Q4KMQ2 | IGGKIIMCPQCDRLCPFWKLNITCESSKLCIFDSFGTLVF   |
| Q4KMQ2 | IIVYRLSVFIVFSAKLPKNINGTDPIQKYLTPQTATSITAS  |
| Q4KMQ2 | WSFSVPPYGDHTSYTMEGYINNTLSIFKVADFKNKSKGNPY  |
| Q4KMQ2 | YTMEGYINNTLSIFKVADFKNKSKGNPYSDLGNHTTCRYRD  |
| Q4KMQ2 | IFKVADFKNKSKGNPYSDLGNHTTCRYRDFRYPPGHPQEYK  |

|        |                                             |
|--------|---------------------------------------------|
| Q6P9J9 | LLLAUVGVACFLYGYLDQDNCTWSKEVCDPDIGGQILMCP    |
| Q6P9J9 | IGGQILMCPQCDRLCPFWRLNITCESSKKLCIFDSFGTLIF   |
| Q6P9J9 | IGIIVYRLSVFIVFSTTLPKNPNGTDPIQKYLTPQMATSIT   |
| Q6P9J9 | IIVYRLSVFIVFSTTLPKNPNGTDPIQKYLTPQMATSITAS   |
| Q6P9J9 | WSFSIPPYGDHTYYTMDGYINNTLSVFNITDFKNTDKENPY   |
| Q6P9J9 | YGDHTYYTMDGYINNTLSVFNITDFKNTDKENPYIGLGNYT   |
| Q6P9J9 | VFNITDFKNTDKENPYIGLGNYTLCRYRDFRNPPGHPQEYK   |
| P18910 | LLLRGGHASDLTVAVVLPNTSYPWSWARVGPVELALAR      |
| P18910 | DDRPCFFIVEGLYMRVRERLNITVNHQEFVEGDDPHYPKLL   |
| P18910 | DNPEYLEFLKQLKLLADKKFNFTVEDGLKNIIPASFHDGLL   |
| P18910 | LYVQAVTETLAQGGTVTDGENITQRMWNRSFQGVTYLKDID   |
| P18910 | ETLAQGGTVTDGENITQRMWNRSFQGVTYLKDIDRNGDRDT   |
| P18910 | DFSLWMDPETGAFRVVLYNYNGTSQELMAVSEHKLYWPLGY   |
| P17342 | LFSLTRVRPAIEYALRSVEGNGTGRRLLPPGTRFQVAYEDS   |
| P17342 | VAHRHGMTSGDYAFFNIELFNSSSYGDGSKWRGDKHDFEAK   |
| P17342 | EVLRAGYSKKDGGKIIQQTNRTFEGIAGQVSDANGDRYG     |
| P41361 | IFLSPLSISTAFAMTKLGACNNTLKQLMEVFKFDTISEKTS   |
| P41361 | TSDQIHFFFALNCRLYRKANKSSELVANSRFLFGKSIITFN   |
| P41361 | NKSSELVANSRFLFGKSIITFNETYQDISEVVYGAQLQPLDF  |
| P41361 | PLDFKGNABEQSRLTINQWISNKTEGRITDVIPPQAINETV   |
| P01008 | IFLSPLSISTAFAMTKLGACNDTLQQLMEVFKFDTISEKTS   |
| P01008 | TSDQIHFFFALNCRLYRKANKSSKLVANSRFLFGDKSLITFN  |
| P01008 | NKSSKLVANSRFLFGDKSLITFNETYQDISELVYGAQLQPLDF |
| P01008 | PLDFKENAEQSRAAINKWSNKTEGRITDVIPSEAINELTV    |
| P32261 | IFLSPLSISTAFAMTKLGACNDTLKQLMEVFKFDTISEKTS   |
| P32261 | TSDQIHFFFALNCRLYRKANKSSDLVANSRFLFGDKSLITFN  |
| P32261 | NKSSDLVANSRFLFGDKSLITFNESYQDVSEVVYGAQLQPLDF |
| P32261 | PLDFKENPEQSRVTINNWWANKTEGRIKDVIPQGAINELTA   |
| Q9H6X2 | IALTDGELHEDLFFYSEREANRSRDLGAIYVCVGVKDFNET   |
| Q9H6X2 | EANRSRDLGAIYVCVGVKDFNETQLARIADSKDHVFPVNDG   |
| Q9H6X2 | RGNFRHARNVDRVLCSEFKINDSVTLNEKPFVSVEDTYLLCP  |
| P19801 | ERHPVREARAVIFFGDQEHPNVTEFAVGFLPGPCYMRALSP   |
| P19801 | YALLYHTLQEATKPLHQFFLNTTGFSFQDCHDRCLAFTDVA   |
| P19801 | VDLDVAGTKNSFQTLQMKLENI TNPWSPRHRVVQPTLEQTQ  |
| Q16853 | SPPPAREALAI VFFGRQPQPNVSELVVGPLPHPSYMRDVTV  |
| Q16853 | TTAPRGLQSGDRATWFGLYYNI SGAGFFLHHVGLLELVNHNK |
| Q16853 | LAQLEAQFEAGLVNVVLI PDNGTGGSWSLKSPVPPGAPPL   |
| Q16853 | EEQAAFLVGSATPRYLILASNHSNKWGHPRGYRIQMLSFAG   |
| Q16853 | GHPRGYRIQMLSFAGEPLPQNSSMARGFSWERYQLAVTQRK   |
| Q16853 | SVFNQNDPWAPTVDSDFINNETIAGKDLVAVVTAGFLHIP    |
| Q29437 | SPPPAREALAI VFFGGQPQPNVTELVVGPLPQPSYMRDVTV  |

|        |                                           |
|--------|-------------------------------------------|
| Q29437 | NSAPRGVQSGDRSTWFGIYYNITKGGPYLHPVGLELLVDHK |
| Q29437 | SVFNQNDPWTPTVDFSDFINNETIAGKDLVAWVTAGFLHIP |
| Q63HQ0 | KTEEDILRAALKYSNKKTGSNFTSASDDSNLEWENDFVSA  |
| P09465 | EKIEEGGLRFYFRHIDCYKNCSEMEITFYVITNNQCSKTT  |
| P09465 | FYVITNNQCSKTTVIGYLKNGTYQTQFEGNNIFQPLYITS  |
| P51693 | LEERRMRQINEVMREWAMADNQSKNLPKADRQALNEHFQSI |
| P51693 | KAQQMRFQVHHLQVIEERVNQLGLLDQNPHLAQELRPQI   |
| P51693 | DAASPEKEKMPLEQYERKVNASVPRGFFHSSEIQRDELA   |
| P10762 | AQARPDAAGHVNIAEAVQQLNHTIVNAAHELHETLGLPTPD |
| P10762 | EAEKHQGSVAEQLNRFARNLNNSIHDAATSAQPADQLNSLQ |
| Q9V496 | NYDYSDFSILTIGASSDVPNSDDTSLKVSQSAKIFAKGN   |
| Q9V496 | STDYQIIYSQHGFLPRSSRINVTTEFFGTNYNVFEASVRQE |
| Q9V496 | LKFSTKNI GEANDKIIAFEANGSLKGLRGNGEIQGTFFIN |
| Q9V496 | EFFLDSKTSLGQYARVNTVWNGTANDGSYDFEAQTNNMESP |
| Q9V496 | DIKINSEASYVSIDEFYIIVNWSSKKLLDGYELEARAQSK  |
| Q9V496 | KNENGIIFSGTATYALKKELNKTIDGQKQYQKALSGN     |
| Q9V496 | LNFAYPGNCKYILAQDSVDNNFTIIGQLTNGKLSITLIDR  |
| Q9HDC9 | CKTRDEPVCGRPLGIRAGPNTLFDVADAYKGLFEVNPWKR  |
| Q9HDC9 | NPWKREVKLLLSSETPIEGKNMSFVNDLTVTDGRKIYFTD  |
| P04114 | LPALLLLLAGARAEEMLENVSLVCPKDTRFKHLRKYTY    |
| P04114 | LVPPETEAKQVFLDFTVYGCSTHFTVKTRKGNVATEIST   |
| P04114 | WSVCKQVFPGLNYCTSGAYSNASSTDSASYPLTGDTRLEL  |
| P04114 | LQVPLLGVLDLSTNVSNLYNWSASYSGGNTSTDHFSLRAR  |
| P04114 | DLSTNVSNLYNWSASYSGGNTSTDHFSLRARYHMKADSVV  |
| P04114 | LSCQRDPNTGRLNGESNLRFNSSYLQGTNQITGRYEDGTL  |
| P04114 | RVNLVKTIHDLHLFIENIDFNKSGSSTASWIQNVDTKYQIR |
| P04114 | GQVYSTLVTYISDWWTLAAKNLTDFAEQYSIQDWAKRMKAL |
| P04114 | YSILKIQSPLFTLDANADIGNGTTANEAGIAASITARGES  |
| P04114 | KINSKHLRVNQNLYVESGLNFSKLEIQSQVDSQHVGHVSVL |
| P04114 | SAQQASWQVSARFNQYKYNQNFSAAGNENIMEAHVINGEA  |
| P04114 | FDRHFEKRNNDLDFVTKSYNETKIKFDKYKAEKSHDELPR  |
| P04114 | SLPDFKELCTISHIFIPAMGNITYDFSPKSSVITLNTNAEL |
| P04114 | TYDFSFKSSVITLNTNAELFNQSDIVAHLLSSSSSVIDALQ |
| P04114 | RGLKLATALSLSNKFVEGSHNSTVSLTTKNMEVSVATTTKA |
| P04114 | NGNTKSKPTVSSSMFKYDFNSMMLYSTAKGAVDHLKLSLES |
| P04114 | IVIPSFQALTARFEVDSPVYNATWSASLKNKADYVETVLD  |
| P04114 | CTMFIREVGTVLSQVYKVNHGSEILFSYFQDLVITLPFEL  |
| P04114 | IKNLVALKDFHSEYIVSASNFTSOLSSQVEQFLHRNIQEY  |
| E9Q414 | LLFLLFLDTSVWAQDEVLENLSFCPKDTRFKHLRKYVY    |
| E9Q414 | LVPPETEEDQQLFLDFTVYGCSTQVTVNSRKGTVPTMST   |
| E9Q414 | WSTCKPLFTGMNYCTTGAYSNASSTESASYPLTGDTRYEL  |

|        |                                             |
|--------|---------------------------------------------|
| E9Q414 | LQVPLLGVLDLSTNVYSNLYNWSASYTGGNTRSRDHFSLQAQ  |
| E9Q414 | DLSTNVYSNLYNWSASYTGGNTRSRDHFSLQAQYRMKTDSDV  |
| E9Q414 | LSCERDVTGQLSGESNMRFNSTYFQGTNQIVGMYQDGALS    |
| E9Q414 | NQVYSTLVTYMSDWWTLTAKNITDFAEQYSIQNWAESIKVL   |
| E9Q414 | HSILKIQSPLFILDANANIQNVTTSGNKAEIVASVTAKGES   |
| E9Q414 | NINGKHLRVIQKLTYESGFLNYSKFEVESKVESQHVGSIL    |
| E9Q414 | RAQQASWQASTRFNQYKYNQNFSAINNEHNIEASIGMNGDA   |
| E9Q414 | FLPDFKGFNTIDNIYIPAMGNFTYDFSFKSSVITLNTNAGL   |
| E9Q414 | TYDFSFKSSVITLNTNAGLYNQSDIVAHFLSSSSFVTDALQ   |
| E9Q414 | NGNTKSKPTVSSSIELNYDFNSKHLHSTATGGIDHKFSLES   |
| E9Q414 | IFIPFFGELTARAGMASPLYNVTWSAGWTKADHVETFLDS    |
| P55056 | KMSRWSLVRGRMKELLETVVNRTRDGWQWFWSPTFRGFMQ    |
| P05090 | RWYETEKIPTTFENGRCTQANYSLMENGKIKVLNQEELRADG  |
| P05090 | NQEELRADGTVNQIEGEATPVNLTEPAKLEVKFSWFMPSPAY  |
| P02649 | QVTQELRALMDETMKELKAYKSELEEQLTPVAEETRARLSK   |
| Q13790 | AGCQADVWALQLLYRQGGVNATQVLIQHRLGLQKGRSTER    |
| P17690 | WPINTLKCMPRVCPFAGILENGTVRYTTFEYPNTISFSCHT   |
| P17690 | CPPPPIPKFASLSVYKPLAGNNSFYGSKAVFKCLPHHAMFG   |
| P17690 | NSFYGSKAVFKCLPHHAMFGNDTVCTEHGNWTQLPECREV    |
| P17690 | KCLPHHAMFGNDTVCTEHGNWTQLPECREVRCPPPSRFDN    |
| P17690 | GCHETYSLDGPREEVECSKFGNWSAQPSCKASCKLSIKRATV  |
| P02749 | CPPPSIPTFATLRVYKPSAGNNSLYRDTAVFECLPQHAMFG   |
| P02749 | NSLYRDTAVFECLPQHAMFGNDTITCTTHGNWTKLPECREV   |
| P02749 | ECLPQHAMFGNDTITCTTHGNWTKLPECREVKCPPPSRFDN   |
| P02749 | GCHDGYSLDGPREEIECTKLGNWSAMPSCASCKVPVKKATV   |
| Q01339 | PFAGILENGIVRYTSFEYPKNISFACNPGFFLNGTSSSKCT   |
| Q01339 | YTSFEYPKNISFACNPGFFLNGTSSSKCTEEGKWSPDIPAC   |
| Q01339 | CPPPVPKFKALKDYRPSAGNNSLYQDTVVFVKCLPHFAMIG   |
| Q01339 | NSLYQDTVVFVKCLPHFAMIGNDTVMCTEQGNWTRLPECLEV  |
| Q01339 | KCLPHFAMIGNDTVMCTEQGNWTRLPECLEVKCPPPRPEN    |
| O14791 | HDLVIKSLDKLKEVREFLGENISNFLSLAGNTYQLTRGIGK   |
| O95445 | GRPDMKTELFSSSCP GGIMLNETGQGYQRFLLYNRSPPPE   |
| P24020 | CVWTIEMKPGHKIILQILPLNLTCGKEYLEVRDQRAGPDF    |
| P29972 | TLFVFI SIGSALGFYKYPVGNNTAVQDNVVKVSLAFGLSIAT |
| P29972 | DYTGCGINPARSFGSAVITHNFSNHWIFWVGFFIGGALAVL   |
| Q42460 | TETSFNFPNFHTDDKLILQGNATISSKGQLQLTGVGSNELP   |
| Q42460 | AFYSDPIQIKDSNNVASFNTNFTFIIRAKNQSI SAYGLAFA  |
| Q42460 | KDSNNVASFNTNFTFIIRAKNQSI SAYGLAFALVPVNSPPQ  |
| P19329 | IVLLTHANSSNDASFNVETFNKTNLILOGDATVSEGHLLL    |
| P19329 | YSAPIQINDRTIDNLASFSTNFTFRINAKNIENSAYGLAFA   |
| P19329 | FALVPVGSRPKLGRYLGLFNNTNYDRDAHTVAVVFDTVSN    |

|        |                                           |
|--------|-------------------------------------------|
| P15514 | PVVLSLLILGSGHYAAGLDLNDTYSGKREPFSGDHSADGFE |
| P15514 | IPGYIVDDSVRVEQVVKPPQNKTESENTSDKPKRKKKGGKN |
| P15514 | DDSVRVEQVVKPPQNKTESENTSDKPKRKKKGGKNGKNRRN |
| P15289 | HQGFHRFLGIPYSHDQGPCQNLTCFPPATPCDGGCDQGLVP |
| P15289 | PATPCDGGCDQGLVPIPLLANLSVEAQPPWLPGLEARYMAF |
| P15289 | LASSLDLLPTLAALAGAPLPNVTLDFDLSPLLLGTGKSPR  |
| P15848 | YLLGSEDIYSHERCTLIDALNVTRCALDFRDGEEVATGYKN |
| P15848 | QDKNRHHYAGMVSLMDEAVGNVTAALKSSGLWNNTVFIFST |
| P15848 | SLMDEAVGNVTAALKSSGLWNNTVFIFSTDNGGQTLAGGNN |
| P15848 | ELIHISDWLPTLVKLGARHTNGTKPLDGFVDWKTISEGSPS |
| P15848 | PRNSMAPAKDDSSLPEYSAFNVSVAHAIRHGNWKLITGYPG |
| P15848 | WKLITGYPGCYWFPSPSYQVNSEIPSSDPPTKTLWLFIDID |
| P51689 | PNILLIMADDLGTGLGCGYGNNTLRTPNIDQLAEEGVRLTQ |
| P51689 | DASNGYRALQWNAGSGGLPENETTFARILQQHGYATGLIGK |
| P51689 | EEMDWLIGKVLNAIEDNGLKNSTFTYFTSDHGGHLEARDGH |
| P51690 | PNILLMADDLIGDIGCYGNNTMRTPNIDRLAEDGVKLTQ   |
| P51690 | VSSIGYRVLQWTGASGGLPTNETTFAKILKEKGYATGLIGK |
| P51690 | LASSYFVGALIVHADCFLMRNHTITEQPMCFQRTTPLILQE |
| P51690 | EEMDWMVGRIIDTLDVEGLSNSTLIYFTSDHGGLENQLGN  |
| Q10723 | AAHQRPNFVVIPTDDQDGIQNSTHPRYQPKLHEHIRYPGIE |
| Q10723 | TFVCCPSRTNLWRGQFSHTNFTDVLGPHGGYAKWKSGLID  |
| Q10723 | AQISPIAPHTSTQIYFDPVANATKTFYFPIAPARHWELFS  |
| Q10723 | EADVSDKPAWIRALPLAQNNRTYLEEVYRLRLRSLASVDE  |
| Q10723 | QGEFWGWSDEVLHHIPRYTNNSWKAVRVYDEDNQAWKLI   |
| Q10723 | TNERELYDLKTDPGELCNLYNKTRAAVTRLEALLAVLVVC  |
| Q10723 | GESCTNPWKILHPEGSVSNWQSLDRKYDYANVAPPQYR    |
| Q7Z1F8 | NTNDEYYKIGKDYDIEANIDNYTNKKAVEDFLKMYRCGFLP |
| Q7Z1F8 | PEAAVEYGIKEDNHVYYSNYSNAITYNEEQRLAYFTED    |
| Q7Z1F8 | YFVQALQKGVFEFGQTIYLNDSKANSFVGNWQDNADLYG   |
| Q13510 | GHLIHGRNMDFGVFLGWNINNDTWVITEQLKPLTVNLDFQR |
| Q13510 | TWVITEQLKPLTVNLDFQRNNTVFKASSFAGYVGMTGFK   |
| Q13510 | WILGKDVMMWIGFLTRTVLENSTSYEEAKNLTKTILAPA   |
| Q13510 | AKNLLTKTKILAPAYFILGGNQSSEGCVITRDRKESLDVYE |
| Q13510 | DRWKHPFFLDDRRTPAKMCLNRTSQENISFETMYDVLSTKP |
| Q13510 | FFLDDRRTPAKMCLNRTSQENISFETMYDVLSTKPVLNKLT |
| Q9WV54 | GHLHGRNMDFGIFLGWNINNDTWVTEELKPLTVNLDFQR   |
| Q9WV54 | TWVTEELKPLTVNLDFQRNNTVFKATSFVGYVGMTGFK    |
| Q9WV54 | WMFGRKDAQWVGFTIRSVLENTSYEEAKNLTKTIMAPV    |
| Q9WV54 | DRWKNTLFIDDRRTPAKCLNHTTQKNLSFATIIDVLSSTKP |
| Q9WV54 | LFIDDDRTPAKCLNHTTQKNLSFATIIDVLSSTKPVLNKLT |
| P07307 | EGHGAQLQAEELRSLKEAFSNFSSSTLTEVQAISTHGGSVG |

|        |                                              |
|--------|----------------------------------------------|
| P07307 | LKHFVVDLRFVACQMELLHSNGSQRTCCPVNWVEHQGSCYW    |
| P08290 | VSSQSMQLQKEFWTLKETLSNFSTTTLMFEKALDSHGGSRN    |
| P08290 | STTTLMFEKALDSHGGSRNDLTSWETILEKKQKDIKADHS     |
| P08290 | LKHFPLDLRRTLTCQLAFFLSNGTECCPVNWVEFGGSCYWFS   |
| P07306 | IGSQNSQLQEELRGLRETFNFTASTEAVKGLSTQGGNVG      |
| P07306 | VKQFVSDLRSLSCQMAALQGNSERTCCPVNWVEHERSCYW     |
| P54074 | NVFINSFSLNQTSAVIGSNSTFANVINFPYRLGLSFIGA      |
| Q1XA76 | PALDFLVEKDNEYCVCEMPCNVTRYGKELSMVKIPSKASAK    |
| Q1XA76 | ELSMVKIPSKASAKYLAKYKSEQYIGENILVLDIFFEAL      |
| Q62962 | PALGLLAEKDSNYCLCRTPCNLTRYNKELSMVKI PSKTSAK   |
| Q62962 | ELSMVKIPSKTSAKYLEKKFNKSEKYISENILEVLDIFFEAL   |
| Q23498 | KMSCLFCTFAVDGVQALIAQNSTDNEIAAFLVNLCDLFDVE    |
| Q23498 | ICGAFIANCGHSDKPLTHMWNITIPGGKPPKIPWPKIPDNK    |
| Q23498 | DFEAHDSWDYTEDLTRENMMNMTNVFLEYFPGVPVYVVSIGN   |
| Q23498 | IDGGYEGATYTVKDAKTYFANVTEANMKNKEFEWVLSYDTR    |
| Q23498 | YQMADFSPQSWSDLSDKLWTNTTLFRDYVRLYRNHYNNEC     |
| Q92484 | DPTYHITDDHTKVCASSKGANASNPGPFQDVLCDSPYQLIL    |
| Q92484 | SPPHVPVPELSTDTVINVITNMTTTTIQSLFPNLQVFPALGN   |
| Q92484 | NLRIISLNTNLYYGNIMTLNKTDPANQFEWLESTLNNSSQ     |
| Q92484 | IMTLNKTDPANQFEWLESTLNNSSQNKVKYIIAHVPVGYL     |
| Q92484 | NKEKVYIIAHVPVGYLPSQNI TAMREYNEKLI DIFQKYS    |
| Q92484 | RLFQYDPRDYKLLDMLQYYLNLTEANLKGESIWKLEYILTQ    |
| P58242 | GVAGAQLGRFWHISDLHLDPNYTVSKDPLQVCPSAGSQFVL    |
| P58242 | PVLNAGPWGDYLCDSPWALINSSLYAMKEIEPKPDFILWTG    |
| P58242 | EIEPKPDFILWTGDDTPHPVNESLGEAAVLAIIVERLTNLIK   |
| P58242 | PAQSNRIYNQVAELWRPWSNESYALFKRGAFYSEKLPGPS     |
| P58242 | QTAGMADPGEQFRWLGDVLSNASRDGEMVYVIGHVPPGFFE    |
| P17405 | GHPARLHRIVPRLRDVFGWNLTCPICKGLFTAINLGLKKE     |
| P17405 | EACGLLLGSTCGHWDIFSSWNI SLPTVPKPPPKPPSPAPG    |
| P17405 | AVGNHESTPVNSFPPPFIEGNHSSRWLYEAMAKAWE PWLPA   |
| P17405 | LRLISLNMNFCSRENFLLINSTDPAQQLQWL VGELQAAED    |
| P17405 | IDGNYGSSHVVDHETYILNLTQANIPGAI PHWQLLYRAR     |
| P37064 | ADGTASISQCAINPGETFFYNFTVDNPGTFFYHGHLMQRS     |
| P37064 | KLPTSPPPQTPAWDDFDRSKNFTYRITAAMGSPKPPVKFNR    |
| P37064 | QFKIGEVDVILQANMMKENLSETHPWHLHGDFWVLGYG       |
| P54958 | KFFDTGSVAVGRGIEDSLTISNLTTSSQDQDIVLADELSQEVCI |
| P54958 | DCSKIPSLPDVTFVINGRNFNISSQYYIQQGNLCYSGFQP     |
| P55956 | GIPLFNGEYEVECSKI PSLPNI TPNLGGQNFDLQKDYILQ   |
| P20933 | QALVRCSSFLPLVVNTWPFKNATEAAWRALASGGSSALDAVE   |
| P20933 | KVISRIQKHPEFFGAVICANVTGSYGAACNKLSTFTQFSF     |
| Q12797 | FLGHMRGSLTLQRLVQLFPNDTSLKNDLGVGYLLIGDNDN     |



|        |                                             |
|--------|---------------------------------------------|
| Q12797 | RLRMHLGLVLPKEGCKIRCANETKTWEEGKVLIFDDSFHE    |
| Q9BXN1 | KRYKELQRLGLGNNKITDIENGLANIIPRVREIHLNENKLLK  |
| Q9HD20 | VFTLSMLVAFEASLVQQMRNMSEIRKMGKPHMIQVYRSR     |
| Q9HD20 | TTGLKPVDSGCVAYVLRGTGFNTSQGKLLRITLFGVKRV TAN |
| Q93235 | QKSYKAYLEQMKTYLTKYDSNATE TRECAGAGDSNDDLEKNP |
| P06583 | EFNNERGERKVCRFKLEWLGNCSGINDETYGYRDGKPCVLI   |
| P06583 | KPCVLIKLNRLVGFKPKPKNESLEAYPVMKYSPYVLPVQC    |
| P06583 | YYGKLLQPKYLQPL LAVQFTNLTMDTEIRIECKAYGENIGY  |
| P05026 | DFNHERGERKVCRFKLEWLGNC SGLNDETYGYKEGKPCII   |
| P05026 | KPCIIKLNRLVGFKPKPKNESLE TYPVMKYNPVLPVQC     |
| P05026 | YYGKLLQPKYLQPL LAVQFTNLTMDTEIRIECKAYGENIGY  |
| P14415 | RLATPGLMIRPKTENLDVIVNVS DTESWDQHVQKLNKFLEP  |
| P14415 | SDTESWDQHVQKLNKFLEPYNDSIQAQKNDVCRPGRYEQP    |
| P14415 | RYYEQPDNGVLNYPKRACQFNRTQLGNC SGIGDSTHYGYST  |
| P14415 | DNGVLNYPKRACQFNRTQLGNC SGIGDSTHYGYSTGQPCVF  |
| P14415 | TGQPCVFIKMNRVINFYAGANQSMNVT CAGKRDEDAENLGN  |
| P14415 | CVFIKMNRVINFYAGANQSMNVT CAGKRDEDAENLGNFVMF  |
| P14415 | PANGNIDLMPFYGYGKKFHVNYTQPLVAVKFLNVT PNVN    |
| P14415 | YYGKKFHVNYTQPLVAVKFLNVT PNVNVECRINAANIAT    |
| P14094 | DINHERGERKVCRFKLDWLGNC SGLNDDSYGYREGKPCII   |
| P14094 | RGERKVCRFKLDWLGNC SGLNDDSYGYREGKPCIIKLN RV  |
| P14094 | KPCIIKLNRLVGFKPKPKNESLE TYPLMMKYNPVLPVQ     |
| P14094 | YYGKLLQPKYLQPL LAVQFTNLTVDTEIRVECKAYGENIGY  |
| P97370 | KKLVEDLESFLKPYSVEEQKNL TSCPDGAPFIQHGPDYRAC  |
| P97370 | RIIDLIPDGYPQISCLPKEENATIATYPEFGVLDLKYFPYY   |
| P14231 | RLATPGLMIRPKTENLDVIVN I SDTESWGQHVQKLNKFLEP |
| P14231 | SDTESWGQHVQKLNKFLEPYNDSIQAQKNDVCRPGRYEQP    |
| P14231 | RYYEQPDNGVLNYPKRACQFNRTQLGDC SGIGDP THYGYST |
| P14231 | TGQPCVFIKMNRVINFYAGANQSMNVT CVGKRDEDAENLGH  |
| P14231 | CVFIKMNRVINFYAGANQSMNVT CVGKRDEDAENLGHFVMF  |
| P14231 | CVGKRDEDAENLGHFVMF PANGSIDLMPFYGYGKKFHVNYT  |
| P14231 | PANGSIDLMPFYGYGKKFHVNYTQPLVAVKFLNVT PNVN    |
| P14231 | YYGKKFHVNYTQPLVAVKFLNVT PNVNVECRINAANIAT    |
| P54709 | AGYIEDLKKFLKPYTLEEQKNL TVCPDGALFEQKGPVYVAC  |
| P54709 | KKLHVGYLQPLVAVQVSFAPNNTGKEVTVECKIDGSANLKS   |
| O04846 | RRQIFYNHKLNSIHREYFTNATLVNHVCNVAMFFGEGAGD    |
| O04846 | VCNVAMFFGEGAGDVIENKNYTLQMHWHTPSEHHLHG VQ    |
| O04846 | PFLSQMKEKLVKKEERLKGHNHTAQVEVGRIDTRHIERKTR   |
| O04846 | RKTRKYRYIGSLTTPPCSENVSWTILGKVRSMSKEQV ELL   |
| O04846 | RSMSKEQVELLRSPLDTSFKNNSRPCQPLNGRRVEMFHDHE   |
| P18850 | MVLTEEPLLYIPPPCQPLINTESLRLNHEL RGWVHRHEV    |

|        |                                             |
|--------|---------------------------------------------|
| P18850 | DTFYVVSFRRDHLLLPATTHNKTRPKMSIVLPAININENV    |
| P18850 | TRILHIKSSSVPPYLDRDQQRNQTNTFFGSPPAATEATHVVS  |
| Q7Z3C6 | FTTFLVSCVDYDILFANKMVNHS LHPTFVKVTL PDAFLPA  |
| Q8N6G6 | TLQGTGENSLSSSTGTFLVDNSSVDFQKFPDKEILRMAGPL   |
| Q86TH1 | VTSQERHCLQQRKRSVPGPGNRTCTGTSKRYQLCRVQECPP   |
| Q86TH1 | SESAESQGLDGAGLMGFVPHNGSLYGASSERLGLDNRLFG    |
| Q86TH1 | EQAGGGACEGPPRGKGFDRNVTGTPLTGDKDDEVDTHFA     |
| Q86TH1 | ANAI SDQLLAGS DLKDFTLNETVNSIFAQGAPRSSLAESF  |
| Q86TH1 | LAESFFVDYEENEGAGPYLLNGSYLELSSDRVANSSSEAPF   |
| Q86TH1 | GAGPYLLNGSYLELSSDRVANSSSEAPFPNVSTSLTSAGN    |
| Q86TH1 | SYLELSSDRVANSSSEAPFPNVSTSLTSAGNRTHKARTRP    |
| Q86TH1 | NSSSEAPFPNVSTSLTSAGNRTHKARTRPKARKQGVSPAD    |
| Q86TH1 | IRCSEDEKLCDPNTRPVGEKNCTGPPCDRQWTVSDWGPCSG   |
| Q86TH1 | HPCGDKNCPAHLAQDWERCNTTCGRGVKKRLVLCMELANG    |
| Q6UY14 | RPDGCVCVGGDDSTCRLVSGNLTDRGGPLGYQKILWIPAGA   |
| Q6UY14 | EFGGGSSVPPERCGHLPRPNI TQSCQLRLCGHWEVGSFWS   |
| Q6ZMM2 | DSCLFVQRVFRDAGAFAGYWNVT LIPEGARHIRVEHRSRNH  |
| P18434 | SPGVTLRPDVYGEKGLDISYNSVSDSTTWAGLAHTLHRFLAG  |
| P18434 | AHTLHRFLAGYSPAQEGSINCTSEKYFFQESFLAPNHTKF    |
| P18434 | EGSINCTSEKYFFQESFLAPNHTKFSCKFTADMLQNCGRP    |
| P18434 | SFLAPNHTKFSCKFTADMLQNCGRPDPTFGFAEGKPCFII    |
| P18434 | AEGKPCFI IKMNRIKFLPGNSTAPRVDCAFLDQPRDGPPL   |
| P18434 | CAFLDQPRDGPPLQVEYFPANGTYSLHYFPYYGKKAQPHYS   |
| Q24046 | KKPAESDYWIELIDDFLRDYNHTEGRDMKHCGFGQVLEPTD   |
| Q24046 | IPEVYDKEEKMPDDLKVINETKTEERQQVWVSCNGHLGK     |
| Q24048 | PKGQVCDVDIKTWSPCTKENNYSYHKSAPCIFLKLNKIYGW   |
| Q24048 | SAPCIFLKLNKIYGWIPEYYNRSNDLPANMPASLKTYIAEV   |
| 075882 | SIYAPLVAASFGLIVPERDGNETVPEVVATSGYALLHFFSD   |
| 075882 | PEVVATSGYALLHFFSDAAYNLTFGNITYSFDMPNNCGR     |
| 075882 | TSGYALLHFFSDAAYNLTFGNITYSFDMPNNCGRGECKI     |
| 075882 | DAAYNLTFGNITYSFDMPNNCGRGECKISNSSDTVECEC     |
| 075882 | TYSFDMPNNCGRGECKISNSSDTVECECSENWKGEACDI     |
| 075882 | EACDIPHCTDNCGFPHRGICNSSDVRGCSFSDWQGGPCSV    |
| 075882 | RGCSFSDWQGGPCSVFPANQSFWTREEYSNLKLPRASHK     |
| 075882 | ASHKAVVNGNIMWVGGYMFNHSYNMV LAYDLASREWLP     |
| 075882 | HSDYNMV LAYDLASREWLP LNRSVNNVVRYGHS LALYKDK |
| 075882 | SLALYKDKIYMYGGKIDSTGNVTNELRVFHIHNESWVLLTP   |
| 075882 | GGKIDSTGNVTNELRVFHIHNESWVLLTPKAKEQYAVVGHS   |
| 075882 | YLHTAVIVSGTMLVFGGNTHNDTSM SHGAKCFSSDFMAYDI  |
| 075882 | LPRPDLHHDVNRFGHSAVLHNS TMYVFGGFNSLLSDILVF   |
| 075882 | YSCTANTNDCHWCNDHCVPRNHSCSEGQISIFRYENCPKDN   |

|        |                                               |
|--------|-----------------------------------------------|
| 075882 | QSSQSMSKLTLPWVGLRKNVSYWCWEDMSPFTNSLLQWM       |
| 075882 | GILSEPSTRGLKAATCINPLNGSVCERPANHSKQCRTPCA      |
| 075882 | GLKAATCINPLNGSVCERPANHSKQCRTPCALRTACGDCT      |
| 075882 | ASFPPGQCMWYTMSTCPPENC SGYCTCSHCLEQPGCGWCT     |
| 075882 | GPVKMPSQAPTGNFYQPPLLNSMCLEDSRYNWSFIHCPAC      |
| 075882 | GNFYQPPLLNSMCLEDSRYNWSFIHCPACQNGHSKCINQ       |
| 075882 | YNWSFIHCPACQNGHSKCINQSI CEKCEENLTGKHCETCI     |
| 075882 | ACQNGHSKCINQSI CEKCEENLTGKHCETCISGFYGDFTN     |
| 075882 | TAINFVATPDEQNRDLDMFINASKNFNLNITWAASF SAGTQ    |
| 075882 | PDEQNRDLDMFINASKNFNLNITWAASF SAGTQAGEEMPVV    |
| 075882 | NIKEYKDSFSNEKDFRNHPNITFFVYVSNFTWPIKIQIAF      |
| 075882 | SNEKDFRNHPNITFFVYVSNFTWPIKIQIAFSQHSNFMDL      |
| Q76LX8 | AQFRVHLVKMVI LTEPEGAPNITANLTSLLSVCGWSQTIN     |
| Q76LX8 | VHLVKMVI LTEPEGAPNITANLTSLLSVCGWSQTINPEDD     |
| Q76LX8 | CDGRMDSQQVWDRCQVCGGDNSTCSPRKG SFTAGRAREYVT    |
| Q76LX8 | KGSFTAGRAREYVTF LTVTPNLTSVY IANHRPLFTHLAVRI   |
| Q76LX8 | HLAVRIGGRYV VAGKMSISPNTTYP S LLEDGRVEYRVALTE  |
| Q76LX8 | GPLQEDADIQVYRRYGE EYGNLTRPDITFTYFQPKRQAVV     |
| Q76LX8 | VWAAVRGPCS VSCGAGLRWVNY SCLDQARKELVETVQCQGS   |
| Q76LX8 | WEVSEPS SCTSAGGAGLALENETCVPGADGLEAPVTEGFGS    |
| Q76LX8 | VAIGRPLGEVVTLRVLES S LNC SAGDMLLLWGRLTWRKMCR  |
| Q76LX8 | HARIAIHALATNMGAGTEGANASY I LIRDTHSLRTTAFHGQ   |
| Q9UNA0 | KQILGPEELPGQTYDATQCCNLTFGPEY S VCPGMDCARLW    |
| Q9UNA0 | CDGIIGSKLQYDKCGVCGGDNS SCKIVGT FNKSKGYTDV     |
| Q9UNA0 | GEYLINGKYMISTSETIIDINGTVMNYS GWSHRDDFLHGMG    |
| Q9UNA0 | NGKYMISTSETIIDINGTVMNYS GWSHRDDFLHGMGYSATK    |
| O96910 | I ILSLALVAAVFADQNC DIGNITSQCQM QHKNCE DANGCDT |
| Q7M460 | DLEFASSE CQMR YQDCGEASNCTALIEECKTSLQE ECDQAS  |
| P02701 | PGLSARKCSLTGKWTNDLGSNMTIGAVNSRGEFTGTIITAV     |
| P27038 | GRSETQECLFFNANWERDR TNQTGVEPCYGD KDKRRHCFAT   |
| P27038 | GVEPCYGD KDKRRHCFATWKNISGSIEIVKQGCWLDDINCY    |
| Q13705 | GEAETRECIYYNANWELERTNQ SGLERCEGEQDKRLHCYAS    |
| Q13705 | GLERCEGEQDKRLHCYASWRNS SGTIELVKKGCWLDDFN CY   |
| P56734 | VNSRGEFTGTYLTA VADNPGNITLSPLLG IQHKRASQPTFG   |
| P56734 | LLGIQHKRASQPTFGFTVHWNFSESTTVFTGQC FIDRNGKE    |
| P61769 | EAIQRTPKIQVYSRHPAENGKSNFLN CYVSGFHPSDIEVDL    |
| P61769 | NFLN CYVSGFHPSDIEVDLLKNGERIEKVEHSDLSFSKDWS    |
| P61769 | SGFHPSDIEVDLLKNGERIEKVEHSDLSFSKDWSFYLLYYT     |
| P61769 | DLLKNGERIEKVEHSDLSFSKDWSFYLLYYTEFTPTEKDEY     |
| P02730 | FFIQDTYTQKLSVPDGFKVSNS SARGWVIHPLGLRSEFFI W   |
| O94766 | LESSLLSHLVDPKDLEPRAANCTRVLVWHTRTEKPKMKQEE     |

|        |                                             |
|--------|---------------------------------------------|
| Q9NY97 | WNREQEKLNRQYNPILSMLTNQTGEAGRLSNI SHLNYCEPD  |
| Q9NY97 | QYNPILSMLTNQTGEAGRLSNI SHLNYCEPDLRVTSVVTGF  |
| Q9NY97 | TGFNNLPDRFKDFLLYLRCRNYSLIIDQPDFKCAKPFLLLA   |
| Q9NY97 | PHFARRQAIRESWGQESNAGNQTVVRVFLGQTPPEDNHDP    |
| Q9NY97 | KFESEKHQDILMWNRYRDTFFNLSLKEVFLRWVSTSCPDE    |
| Q9Z222 | LLGILMMANVFIYLIVEVSKNSSQDKNGKGGVII PKEKFWK  |
| Q9Z222 | WNREQEKLNRWYNPILNRVANQTGELATSPNTSHLSYCEPD   |
| Q9Z222 | WYNPILNRVANQTGELATSPNTSHLSYCEPDSTVMTAVTDF   |
| Q9Z222 | TDFNNLPDRFKDFLLYLRCRNYSLIIDQPKKCAKPFLLLA    |
| Q9Z222 | PHFARRQAIRESWGRETNVGNQTVVRVFLGKTPPEDNHDP    |
| Q9Z222 | KFESDKHQDILMWNRYRDTFFNLSLKEVFLRWVSTSCPDAE   |
| Q91YY2 | LFGRDPGPTFDYSHPHDVSNLSHLPAAPGAAGAPPAQALP    |
| Q91YY2 | HPFLQRQQLAYGIYVIHQAGNGTFNRAKLLNVGVREALRDE   |
| Q91YY2 | DGMNSLTYRLLARELGPLYTNI TADIGTDPRGPRSPSGPRY  |
| P03228 | RGFFDIHRSANTFFLVVTAANISHDGNYLCRMKLGETEVTK   |
| P0CW72 | RGFFDIHRSANTFFLVVTAANISHDGNYLCRMKLGETEVTK   |
| P35613 | GTVFTTVEDLGSKILLTCSLNSDTEVTGHRWLKGGVVLKE    |
| P35613 | PPVTDWAWYKITDSEDKALMNGSERFFVSSSQGRSELHIE    |
| P35613 | RSELHIENLNMEADPGQYRCNGTSSKGSQDAIITLVRVSHL   |
| P18572 | GTIQTSVQEVNSKTQLTCSLNSGVDIVGHRWRRGGKVLQE    |
| P18572 | PITDWFVKTSDTGEEEAITNSTEANGKYVVVSTPEKSQLT    |
| P18572 | FWFKTSDTGEEEAITNSTEANGKYVVVSTPEKSQLTISNLD   |
| P18572 | KSQLTISNLDVNVDPGTYVCNATNAQGTRETISLRVRSRM    |
| P18572 | LTISNLDVNVDPGTYVCNATNAQGTRETISLRVRSRMAAL    |
| P17790 | ERPVITGQYSSSADKVVLSCNISAPPTLIKGHKMWLGDKVL   |
| P17790 | VEDHSGVYECTYNTNPVAKGNVSTIEVEPQVVAYKKSEHGNE  |
| P17790 | HWAWYKSGQTVPLESSAGIYNI SRTGNKTELRIKLKLNIEQD |
| P17790 | SGQTVPLESSAGIYNI SRTGNKTELRIKLKLNIEQDMGDYSC |
| P17790 | KTELRIKLKLNIEQDMGDYSCNGTNMKGSGSATVNLVRVSRRL |
| P50895 | YTLFRLQDEQEVLNVNLEGNLTLEGVTRGQSGTYGCRVED    |
| P50895 | RVAYLDPLELSEGVLSLPLNSSAVVNCVHGLPTPALRWT     |
| P50895 | PLELSEGVLSLPLNSSAVVNCVHGLPTPALRWTKDSSTPL    |
| P50895 | DSTPLGDGPMLSLSSITFDSNGTYVCEASLPTVPVLSRTQN   |
| P50895 | NGTYVCEASLPTVPVLSRTQNFTLLVQGSPELKTAETEPKA   |
| P23560 | PLEPPLFLLEEYKNYLDAANMSMRVRRHSDPARRGELSVC    |
| Q700S9 | LGHPPGYTSYDYGSAISESRNI TREKYSELKLLGNFAKVSP  |
| Q700S9 | SDYSSQASVEYKLTVPVTSAGNLTI PQLGGSLTLSGRDSKIH |
| Q700S9 | GYLVRSAVLDGNDLHIQADFNATPIEVVVGAPSGAKNLVIN   |
| Q700S9 | PEAKNTYDDSAWTSADHAYTNNSAHSLOTPPTSIFASDYGYH  |
| Q700S9 | EKTFFVQTKGGTAYGHSIWINETYVGSWAGTSINDNNNATY   |
| Q700S9 | IWINETYVGSWAGTSINDNNNATYTLPTLQSGKNYVITVVI   |

|        |                                             |
|--------|---------------------------------------------|
| Q700S9 | TSFDLDPGSDIPLYFNFGNSTSTPAAYRVQLYVNGYQYG     |
| P16278 | VRILPLLLVLLLLGPTRGLRNATQRMFEIDYSRDSFLKDGQ   |
| P16278 | FLKCGALQGLYTTVDFGTGSNITDAFLSQRKCEPKGPLINS   |
| P16278 | YVAVDGIQGVLERNNVITLNI TGKAGATLDDLLENMGRVN   |
| P16278 | ENMGRVNYGAYINDFKGLVSNLTLSSNILTDTWTIFPLDTE   |
| P16278 | SHLGGWHRDSGHHDEAWAHNSNYTLPAFYMGNFSPSGI      |
| P16278 | GGWGHRSRSGHHDEAWAHNSNYTLPAFYMGNFSPSGIPDL    |
| P16278 | HDEAWAHNSNYTLPAFYMGNFSPSGIPDLQDFTIQFPG      |
| P08236 | ISNLVQVGPLPSRLRITIAINNTLTPTTLPPTIQLTDT      |
| P08236 | GSNLFKLEVRLLDAENKVVANGTGTQGLKVPVGSVSLWVYL   |
| P08236 | GIVVIDECPVGLALPQFFNNVSLHHMQVMEEVVRDKNH      |
| O95972 | LRYMLELYRRSADSHGHPRENRTIGATMVRVVKPLTNVARP   |
| O95972 | LYQLVRATVVYRHHQLTRFNLSCHVEPWVQKNPTNHFSS     |
| O95972 | GLELWHGTSSLDIAFLLLYFNDTHKSIRKAKFLPRGMEEFM   |
| P12643 | EESLEELPETSCKTTRRFNFNLSSIPTEEFITSAELQVFRE   |
| P12643 | EFITSAELQVFREQMDALGNNSFHHRINIYEI IKPATAN    |
| P12643 | FITSAELQVFREQMDALGNNSFHHRINIYEI IKPATANS    |
| P12643 | ATANSKFPVTRLLDTRLVNQNASRWESFDVTFVAVMRWTAQG  |
| P12643 | PGYHAFYCHGECPPFLADHLNSTNHAIVQTLVNSVNSKIPK   |
| Q96DR5 | ISNSLILDVKAEPIDDGKGLNLSFPVTANVTVAGPI IGQII  |
| Q96DR5 | VKAEPIDDGKGLNLSFPVTANVTVAGPI IGQI INLKASLDL |
| Q8N4F0 | VPRHLKFIAGFGVRLAAANFTFKVFRAPEPLELTLPEL      |
| Q8N4F0 | VVSI SACSLSFGHANEFDGSNSTSHALLVLVQKHIAVLSN   |
| Q8N4F0 | KAGALNLDITGQLRSDNLLNTSALGRLIPEVARQFPEPMP    |
| Q8N4F0 | MPVVLKVR LGATPVAMLHTNATLRLQPFEVVLATASNSAF   |
| O22476 | SSSLSLTGLESLFLSNHINGSVSGFKCSASLTSLDLRN      |
| O22476 | LSGPVTTLTSIGSCSGLKFLNVSSNTLDFPGKVSGLKLS     |
| O22476 | SGDVVSRVCVLEFLDVSNNFSTGIPFLGDCSALQHLDIS     |
| O22476 | NKLSGDFSRAISTCTELKLLNISSNQFVGPVPLPLKSLQY    |
| O22476 | AVPPFFGSCSLESLSLSSNNFSGELPMDTLKMRGLKVLD     |
| O22476 | LKVLDSFNEFSGELPESLTNLSASLLTLDLSSNNFSGPIL    |
| O22476 | LPESLTNLSASLLTLDLSSNNFSGPILPNLCQNPKNLQEL    |
| O22476 | LQELYLQNNGFTGKIPPTLSNCSELVSLHLSFNYSGLTIPS   |
| O22476 | LETLLDFNDLTGEIPSGLSNCTNLNWSLSNNRITGEIPK     |
| O22476 | TGEIPKWI GRLENLAIKLSNNSFSGNI PAELGDCRS LIWL |
| O22476 | PAELGDCRS LIWLDLNTNLFNGTI PAAMFKQSGKIAANFIA |
| O22476 | LEFQGI RSEQLNRLSTRNFCNITSRVYGGHTSPTFDNNGSM  |
| O22476 | NPCNITSRVYGGHTSPTFDNNGSMFLDMSYNMLSGYIPKE    |
| O22476 | RIPQAMSALMTLTEIDLNNLSGPIPEMGQFETFPKAKFL     |
| P14518 | KTDGVPNSAYITGYARVPRNNESSMMYAVSKQPI TVAVDAN  |
| Q96G97 | FYYRTDCSSSTSLCSFPVANVSLTKGGRDRVLMYQPYRV     |

|        |                                            |
|--------|--------------------------------------------|
| Q96G97 | GLRYLLYNFPMTCAFIGVASNFTFLSVIVLFSYMQWVWGGI  |
| Q9G2N4 | VVGEDSTDSEWPWIVSIQKNGTHHCAGSLLTSRWVITAAH   |
| Q10588 | IFLGRCAEYRALLSPEQRNKNCTAIWEAFKVALDKDPCSVL  |
| Q10588 | KVALDKDPCSVLPSDYDLFINLSRHSIPRDKSLFWENSHLL  |
| Q10588 | PLSDVLYGRVADFLSWCRQKNDSGLDYQSCPTSEDCENNPV  |
| Q10588 | WKRASIQYSKDSSGVIHVMLNGSEPTGAYPIKGFADYEIP   |
| Q10589 | TIKANSEACRDGLRAVMECRNVTHLLQQELTEAQKGFQDVE  |
| Q10589 | QELTEAQKGFQDVEAQAATCNHTVMALMASLDAEKAQGQKK  |
| Q13410 | PEPI LAVVGEDAELPCRLSPNASAEHLELRWFRKKVSPAVL |
| Q13410 | DEEGLFTVAASVIIRDTSAKNVSCYIQNLLLQEKKEVEISI  |
| Q8R2Q8 | AVTANSVACRDGLRAQAECRNTHLLQRQLTRTQDSSLQAE   |
| Q8R2Q8 | LLQRQLTRTQDSSLQAEQANSNLTVVTLQESLEKKVSOA    |
| Q8R2Q8 | RQLTRTQDSSLQAEQANSNLTVVTLQESLEKKVSOALEQ    |
| P18892 | QEPI LAVVGEDAELPCRLSPNVSAGMELRWFREKVS PAVF |
| P18892 | DEEGLFTVRASVIIRDSSMKNVSCIRNLLLQEKKEVEVSI   |
| Q7KYR7 | VSAQFIVVGPTDPI LATVGENTTLRCHLSPEKNAEDMEVRW |
| Q7KYR7 | GRTTFVSKDISRGSVALVIHNI TAQENGTYRCYFQEGRSYD |
| Q7KYR7 | SKDISRGSVALVIHNI TAQENGTYRCYFQEGRSYDEAILHL |
| O00478 | GRTSILRDGITAGKAALRIHNVTASDSGKYLCYFQDGFYE   |
| O00481 | GRTSILRDGITAGKAALRIHNVTASDSGKYLCYFQDGFYE   |
| Q9XWH8 | FIWDQVDKYEAVAGFSGQITVNYTTDSEGQKTRTVKVNLTDP |
| Q9XWH8 | QITVNYTTDSEGQKTRTVKVNLTDPGGEIWYNVSRSRYLST  |
| Q9XWH8 | GQKTRTVKVNLTDPGGEIWYNVSRSRYLSTYYASNYTLEP   |
| Q9XWH8 | GEIWYNVSRSRYLSTYYASNYTLEPQKRHMEAMELDKYFA   |
| Q9XWH8 | VSSCFLSFHSTYFHDLFEDNSTSLNIEIPVEGVSYEDLG    |
| Q9XWH8 | QTPYVLGLVENHLLTNTFAWNETLMLLADKYGLMRLGKSI   |
| P43251 | TAAQKDVQIIIVFPEDGIHGFNFTRTSIYPFLDFMPSQVVR  |
| P43251 | DFMPSQVVRWNPCLPFRFNDTEVLQRLSCMAIRGDMFLV    |
| P43251 | DPRCPKDGRYQFNTNVVFSNNGTLVDRYRKHNLYFEAAFV   |
| P43251 | KSHLIIAQVAKNPVGLIGAENATGETDPSHSKFLKILSGDP  |
| P43251 | EATKWNVNAPPTFHSEMMYDNFTLVPVWGKEGYLHVCSNGL  |
| P43251 | DTCGQEITEATGIFEFHLWGNFSTSYIFPLFLTSGMTLEVP  |
| Q8CIF4 | AAAQKGVQIIIVFPEDGIHGFNFTRTSIYPFLDFMPSKLV   |
| Q8CIF4 | DFMPSKLVVRWNPCLPFRFNDTEVLQRLSCMAIKGGMFLV   |
| Q8CIF4 | DPGCPQDGRYQFNTNVVFSNNGTLVDRYRKHNLYFEAAFDT  |
| Q8CIF4 | KGHLIIAQVATNPQGLTGTGNTTSEMDPSHRKFLKILSGDP  |
| Q8CIF4 | EAAKWNVNVPPTFHSEMMYDNFTLVPVWGTEGHLQVCSNSL  |
| Q8CIF4 | DTCGQEITEAEGFLDFHLWGNFSTLYIFPLFLTSGMTLDTP  |
| Q86VB7 | VSVICNQLGCPTAIKAPGWANSSAGSGRIWMDHVSRCRGNES |
| Q86VB7 | CRGNESALWDCKHDGWGKHSNCTHQDAGVTCSDGSNLEMR   |
| Q86VB7 | SWDLSDAHVVCRQLGCGEAINATGSAHFEGTGP IWLDEMK  |

|        |                                                                                   |
|--------|-----------------------------------------------------------------------------------|
| Q86VB7 | DCPARRWGHSECGHKEDA AVNCTDISVQKTPQKATTGRSSR                                        |
| Q9NR16 | FSAVVT C I L L L N S C F L I S S F N G T D L E L R L V N G D G P C S G T V E      |
| Q9NR16 | S G T V E V K F Q G Q W G T V C D D G W N T T A S T V V C K Q L G C P F S F A M F |
| Q9NR16 | F G Q A V T R H G K I W L D D V S C Y G N E S A L W E C Q H R E W G S H N C Y H G |
| Q9NR16 | E D V G V N C Y G E A N L G L R L V D G N N S C S G R V E V K F Q E R W G T I C D |
| Q9NR16 | L P H L Q S G S D V V W L D G V S C S G N E S F L W D C R H S G T V N F D C L H Q |
| Q9NR16 | V S V I C S D G A D L E L R L A D G S N N C S G R V E V R I H E Q W W T I C D Q N |
| Q9NR16 | R A K P S N E A R D I W I N S I S C T G N E S A L W D C T Y D G K A K R T C F R R |
| Q9NR16 | M T Y F K E A S G P I W L D D V S C I G N E S N I W D C E H S G W G K H N C V H R |
| Q9NR16 | A A V V C S Q L D C P S S I I G M G L G N A S T G Y G K I W L D D V S C D G D E S |
| Q9NR16 | G K Y I G E R S V R V W G H R F H C L G N E S L D N C Q M T V L G A P P C I H G   |
| Q9NR16 | N T V S V I C T G S L T Q P L F P C L A N V S D P Y L S A V P E G S A L I C L E D |
| Q9NR16 | G W D L S D A H V V C Q K L G C G V A F N A T V S A H F G E G S G P I W L D D L N |
| Q9NR16 | N A T V S A H F G E G S G P I W L D D L N C T G M E S H L W Q C P S R G W G Q H D |
| Q9NR16 | L R L Y S E T E T E S C A G R L E V F Y N G T W G S V G R R N I T T A I A G I V C |
| Q9NR16 | S C A G R L E V F Y N G T W G S V G R R N I T T A I A G I V C R Q L G C G E N V   |
| Q9NR16 | D A S F G Q G T G T I W L D D M R C K G N E S F L W D C H A K P W G Q S D C G H K |
| Q9NR16 | D C G H K E D A G V R C S G Q S L K S L N A S S G H L A L I L S S I F G L L L L V |
| P02745 | M G G N V V I F D T V I T N Q E E P Y Q N H S G R F V C T V P G Y Y F T F Q V L   |
| P98086 | T L G N V V I F D K V L T N Q E S P Y Q N H T G R F I C A V P G F Y Y F N F Q V I |
| Q8CG16 | F M S Q G N K M L L T F H T D F S N E E N G T I M F Y K G F L A Y Y Q A V D L D E |
| Q8CG16 | P S G Y V S S L E Y P Q P Y P P D L R C N Y S I R V E R G L T V H L K F L D P F E |
| Q8CG16 | L E L E N S V T L G P E L L P I C L P D N E T F Y Q G L M G Y V S G F G I T E D   |
| P00736 | F M S Q G N K M L L T F H T D F S N E E N G T I M F Y K G F L A Y Y Q A V D L D E |
| P00736 | A S G Y I S S L E Y P R S Y P P D L R C N Y S I R V E R G L T L H L K F L E P F D |
| P00736 | D R W I L T A A H T L Y P K E H E A Q S N A S L D V F L G H T N V E E L M K L G N |
| P00736 | L E L E N S V T L G P N L L P I C L P D N D T F Y D L G L M G Y V S G F G V M E E |
| Q9NZP8 | E F V S S G R S L R L T F R T Q P S E N K T A H L H K G F L A L Y Q T V A V N Y   |
| Q9NZP8 | E N K T A H L H K G F L A L Y Q T V A V N Y S Q P I S E A S R G S E A I N A P G D |
| Q9NZP8 | G E E V L Q C M P V C G R P V T P I A Q N Q T T L G S S R A K L G N F P W Q A F T |
| Q9NZP8 | R W I L T A A H T I Y P K D S V S L R K N Q S V N V F L G H T A I D E M L K L G N |
| Q9NZP8 | L E L Q H S I P L G P N V L P V C L P D N E T L Y R S G L L G Y V S G F G M E M G |
| P09871 | Y F C S C P P E Y F L H D D M K N C G V N C S G D V F T A L I G E I A S P N Y P K |
| P09871 | C E E P Y Y M E N G G G G E Y H C A G N G S W V N E V L G P E L P K C V P V C G   |
| Q16581 | Y K F G L S S S L D Y P D F Y G D P L E N R S L E N I V Q P P G E M N D R L D P S |
| P04003 | Y S C D P R F S L L G H A S I S C T V E N E T I G V W R P S P P T C E K I T C R K |
| P04003 | K P E L V N G R L S V D K D Q Y V E P E N V T I Q C D S G Y G V V G P Q S I T C S |
| P04003 | T I Q C D S G Y G V V G P Q S I T C S G N R T W Y E V P K C E W E T P E G C E Q   |
| P20851 | L G T Y V C I K G Y H L V G K K T L F C N A S K E W D N T T T E C R L G H C F D P |
| P20851 | K G Y H L V G K K T L F C N A S K E W D N T T T E C R L G H C P D P V L V N G E F |
| P20851 | L G H C P D P V L V N G E F S S S G P V N V S D K I T F M C N D H Y I L K G S N R |

|        |                                             |
|--------|---------------------------------------------|
| P20851 | VNVSDKITFMCNDHYILKGSNRSQCLEDHTWAPPFPICKSR   |
| P20851 | CKSRDCDPPGNFVHGYPFEGNNFTLGSTISYYCEDRYYLGV   |
| P08607 | VFGKCGPPFAIPNALPASDVNRDFESHHTLKYECLPGYGR    |
| P08607 | YTCDPGFRLVGSPPFIGCTVVNKTVPVWSSSPPTCEKII CSQ |
| P08607 | IVSGYKATYTHRDSVRLACLNGTVLRGRHVIECQGNNGWSS   |
| P08607 | ACLNGTVLRGRHVIECQGNNGWSSLPTCEFDCLPPAIVNG    |
| P08607 | SKWKGTAPQCKALCQKPEVNGTLSDEKDQYVESENVTIQC    |
| P08607 | KPEVNGTLSDEKDQYVESENVTIQCDSGFAMLGSSQISCS    |
| P08607 | PEVPRCEQEASEDLKPALGTGNKTMQYVPSNSHDVMALEIYK  |
| O08532 | PNNARQLVEIAARDIEKLNSNRKALVRLAMEAEKVQAAHQ    |
| O08532 | DFASNEVVYNAKDDLDPERNESEPGSQRIKPVFIEDANFG    |
| O08532 | AAVHIPTDIYEGSTIVLNLNWTLSALDEVFKRNRDEDPDLL   |
| O08532 | CFQHLVQANVRNKKVLDKAVNNITAKGITDYKKGFSFAFEQ   |
| O08532 | FQHLVQANVRNKKVLDKAVNNITAKGITDYKKGFSFAFEQL   |
| O08532 | KGITDYKKGFSFAFEQLLNYNVSRANCNKIIMLFTDGGEEER  |
| O08532 | KSQDERYIDKGNRTYTWTVPNGTDYSLALVLPYTFYIYKA    |
| O08532 | WQENPETYEDSFYKRSLDNDNYVFTAPYFNKSGPGAYESGI   |
| O08532 | DSFYKRSLDNDNYVFTAPYFNKSGPGAYESGIMVSKAVELY   |
| O08532 | TNQIGRFFGEIDPSMMRHLVNI SLYAFNKSYDYQSVCDPGA  |
| Q9NY47 | KGTTGYKAGFEYAFDQLQNSNITRANCNKIMMFTDGGEDR    |
| Q9NY47 | MFTDGGEDRVQDVFKEYNWPNRTRVFTFSVQGHNYDVTPL    |
| Q9NY47 | NVYEDALGLGLVVTGTLVPVFNLTQDGPGEKKNQLILGVMGI  |
| Q9NY47 | LILGVMGIDVALNDIKRLTPNYTLGANGYVFAIDLNGYVLL   |
| Q9NY47 | KQIRTLVKSLDERYIDEVTRNYTWVPIRSTNYSGLVLPY     |
| Q9NY47 | VVGKLDLEAWAEKFKVLASNRTHQDQPQKCGPNSHCEMDC    |
| P55290 | QQKVFHINQPAEFIEDQSILNLTFSDCRGNDKLRYEVSSPY   |
| P55290 | YEVSSPYFKVNSDGGGLVALRNI TAVGKTLFVHARTPHAEDM |
| P55290 | KFTKKEFQATVEEGAVGVI VNLTVEDKDDPTTGAWRAAYTI  |
| P55290 | DPMMVTRQEDLSVGSVLLTVNATDPDSLQHQITRYSVYKDP   |
| P55290 | QTRYSVYKDPAGWLNINPINGTVDTTAVLDRES PFVDNSV   |
| P55290 | VNDNAPFIYPTVAEVCDDAKNLSVILGASDKDLHPNTDPF    |
| P55290 | FKFEIHKQAVPDKVWKISKINNTHALVSLQLNKNKANYNLP   |
| P55290 | NKANYNLPIMVTDGKPPMTNITDLRVQVCSCRNSKVCNA     |
| P33146 | VDEEPRNVFSIDKFTGRVYLNATLDREKTDRLRAFALDL     |
| P33146 | HTGEIRTQVGLDREVAVYNLTLQVADMSGDGLTATASAI     |
| P33146 | PPHGAPFFHQLNPRVPDLGRNWSVSQINVSHARLRLRHQVS   |
| P33146 | HFQLNPRVPDLGRNWSVSQINVSHARLRLRHQVSEGLHRLS   |
| P33146 | RLSLLQDSGEPQQREQTLNVTVCRCGSDGTCLPGAAALR     |
| Q9VGG5 | GETNLPPVFTQTLNNI ILYENVTVGTVVFRLEAYDPEGSPV  |
| Q9VGG5 | SFVTYGAI GADHFSVDPVSGNITLIKPLDREKDTLKFVLS   |
| Q9VGG5 | KFRLHI IKRDATILEAAVVLNDTLNYNQRMVYHFQIEATDG  |



|        |                                               |
|--------|-----------------------------------------------|
| Q9VGG5 | VFDVEPKLVTGYSQVNIRVANGTLDYENPNQRKFIVLVVAE     |
| Q9VGG5 | EQVESIFDIDRETGQIIIRPNATLDVTNLNSDQLIFAVEAN     |
| Q9VGG5 | DQLIFAVEANDGLFTAHCGVNITVRDVNNHVPNFEEQSYSYA    |
| Q9VGG5 | VGTVLTTLQANDEDESSIGEFNISDNDYFAINQTSGMIYTIATIA |
| Q9VGG5 | NDEDSSIGEFNISDNDYFAINQTSGMIYTIARLDYEVVKEV     |
| Q9VGG5 | VDIINLNDNDPKFSQSDYFNVNTENSPRGTVAGKVEAHDGD     |
| Q9VGG5 | IGENNKYFSDIAYTGNVMVANSSILDREQIKELTSLVVAQD     |
| Q9VGG5 | IHNILDVNDNAPVFRDVRVNSTVAENAAQPPAALLQVQA       |
| Q9VGG5 | IITVLRVNRHKPEFVIPALSNATIEIPGDIVQPDYLLLTVR     |
| Q9VGG5 | EIPGDIVQPDYLLLTVRAMDNDTEENGKVSYHLQVNNRNEQ     |
| Q9VGG5 | LLGNEDGAFYVDKLTGDIYTNKSLDREETDVYTYLILASIK     |
| Q9VGG5 | PIYYAGVNNANAKMGAAITLVNATDADQGKNAKIEFMIVASN    |
| Q9VGG5 | LSRPPPEEVYQEQEETIAELRNATQHRIIVDEIRFHLDISGR    |
| P08641 | EVFVGYIEENAKPGTSMVTVNATDADDAVNTDNGIVSYSIV     |
| P08641 | DPAKGISVLTGLDRETTPNYTLIVQATDQEGKLSNTAT        |
| P08641 | PENGIVTATQPLDRESVHAINSTYKAIILAVDNGIPDPTGT     |
| P08641 | KDLPPTYPFKAALEHGSSNNWTVIEIRGQDELAMGLKKELE     |
| P12830 | DTGAISTRAELDREDFEHVKNSTYTALIIATDNGSPVATGT     |
| P12830 | REDFEHVKNSTYTALIIATDNGSPVATGTGTLILLSDVND      |
| P12830 | FCERNPKPQVINIIDADLPPNTSPFTAELTHGASANWTIQY     |
| P12830 | ADLPNTSPFTAELTHGASANWTIQYNDPTQESIILKPKMA      |
| P19022 | ENSRGFPFQELVRIRSDRDKNLSLRYSVTGPADQPPTGIF      |
| P19022 | IVINVIDMNDNRPEFLHQVWNGTVPEGSKPGTYVMTVTAID     |
| P19022 | RYRIVSQAPSTPSPNMFTINNETGDIITVAAGLDREKVQOY     |
| P19022 | FTAMTFYGEVPEENRVDIIVANLTVTDKQPHTPAWNNAVYRI    |
| P19022 | QITTIAVLDRESVNVKNNIYNATFLASDNGIPPMSTGTTLQ     |
| P19022 | DPNAGPFAFDLPLSPVTIKRNWTITRLNGDFAQLNLKIKFL     |
| P19022 | EAGIYEVPIIITDNGNPPKSNISILRVKVCQCDSDNGDCTDV    |
| Q19319 | SLVTTSSSTEQIFEFAPLYNLSVEENSIGSKYARSENSTK      |
| Q19319 | PLYNLSVEENSIGSKYARSENSTKIGVPLPEKDANCKFRVA     |
| Q19319 | RVEASDADIGINSAIYFSLVNRSHDFIVEPVTGWVRSRHRV     |
| Q19319 | EPEVVGNDGTELKRWMLYAKNGSQVPKNTNVTLTIGEDYIR     |
| Q19319 | TKELRWMLYAKNGSQVPKNTNVTLTIGEDYIRRSGFSISKK     |
| Q19319 | GEDYIRRSGFSISKKPVIPNETVTIQIERLAEHLIRFLDN      |
| Q19319 | NPDDVSLIRYSLEYSKSDLPNATLPFAIGSKNGILRVSAKI     |
| Q19319 | ATLPFAIGSKNGILRVSAKINRSERVYFNKVIASLHGINEK     |
| Q19319 | AIDLGLPLSRMSALNLMFYKNGTKIPAKPKPIIQESENKH      |
| Q19319 | VHTFAIIASDEGFPMRVSVTNLTI SVEDVNDNPPKCVVQHS    |
| Q19319 | GCIFIHAPYPLDYHKTPFFNLSIEVADHGDPIFSTSCHLH      |
| Q19319 | KLCRIFAVDADEGENARLTYNITEGDARFSDNNGNIIASE      |
| Q19319 | TGQLLAKKVELLKRGEIIRLNI SVTDGQAWDHSTVI IQVSR   |

|        |                                            |
|--------|--------------------------------------------|
| Q19319 | TPVLVLNALHHGTVSYKLEPNCTFFEVEHTLSGAVHLATWLT |
| Q19319 | STENSKFKFTRNEYHTSLIENTTLPPGSIILSVATIGDKLD  |
| Q19319 | KLPSIEEEDLEFNFKLIAKDNGSVHRVEEPVKIRVVDKARP  |
| Q19319 | SVDFLTGEVRLNNLKMLAETNYTFFEVEAREVTRPKMIAKAQ |
| Q19319 | PESTSIGQRLLTIKATTSDENDTIEYSLSGSKDIEIHPETG  |
| Q19319 | SLARPVEQDDLVNEDTKKVLNVSVTDGIIVNKSALLTVAVK  |
| Q19319 | LVNEDTKKVLNVSVTDGIIVNKSALLTVAVKGGVPPQLQFSL |
| Q19319 | VAVKGGVPPQLQFSLAPTTSSNSSTSKEAWPVAIDRKTGRIH |
| Q19319 | SESAKEGDTVMVMSATDDDDENDTIEYSLLDGSESQFFSVHP |
| Q19319 | LPSTSPILHFSIKDDDLSPNNVQFFIPKGNEEGVFWIDSN   |
| Q19319 | TKVKINLKSSKSDSIRCEANKTVILAENSKKGTVVLGESS   |
| Q19319 | LAENSKKGTVVLGESSLLGPNVTFKLSDNDGNVFNFRNG    |
| Q19319 | DINGVVTVVKPLDSEILGFFNLTVVASDGEFEDKATILVTV  |
| Q19319 | MESESIGYELAHFRASGGDQNETIEYLLKPSDVTFSVNLNA  |
| Q19319 | ALLEIHVEDENDHAPTFFDCNMTALVQEGEATIGHRLKFSV  |
| Q19319 | DPNTGDIWSDHSITQGLHTFNVTVTDSKFNVTVSVEVHVTS  |
| Q19319 | TNQCAKSPCEQWQLCIPSVHNSYECVCPGMGDKCSVPS     |
| Q19319 | TSGQCISIPRHSLESSDFICNCTGGILQSTPCAESDILST   |
| P33151 | THRRQKRDIWNQMHIDEKNTSLPHHVGIKSSVSRKNAK     |
| P33151 | VFRVDAETGDVFAIERLDRENISEYHLTAVIVDKDTGENLE  |
| P33151 | FTIKVHDVNDNWPVFTHRLFNASVPESAVGTSVISVTAVD   |
| P33151 | PTIDLRYMSPAGNRAQVIINIITDVDEPPIFQQPFYHFQLK  |
| P33151 | TKKGDIIYNEKELDREVYPWYNLTVEAKELDSTGTPTGKESI |
| P33151 | IDKIDITPRNVKFKFILNTENNFTLTDNHDNTANITVKYGF  |
| P33151 | KFILNTENNFTLTDNHDNTANITVKYGFQDREHTKVHFLPV  |
| P55285 | SGFPAKKRALELSGNSKNELNRSKRSMWNQFFLEEYTG     |
| P55285 | VIQAKDMGGQMGGLSGTTVNIITLTDVNDNPPRFPOSTYQF  |
| P55285 | EPPVFSKLAYILQIREDAQINTTIGSVTAQDPDAARNPVKY  |
| P55285 | VKYSVDRHTMDRIFNIDSGNGSIFTSKLLDRETLWHNIT    |
| P55285 | SGNGSIFTSKLLDRETLWHNITVIAEINNPKQSSRVPLY    |
| P55285 | DPYSGHQFSSLAPEAASGSNFTIQDNKDNTAGILTRKNGY   |
| P33148 | EYIFSVNRRELERGRKLGKVNFSDCPTRKHGLYDVGDSRFR  |
| P33148 | PGTPAWQAVYKIRVNEGFFNITTDPEQNQILTTAKGLDF    |
| P33148 | KDNGIVTGNGNLDRESEYVKNNTYTVIMLVTDGVSVTGT    |
| P33148 | DYSIYVLLSDAQNNPQLTVVNATVCSCEGKAIKCQEKLGG   |
| Q9BY67 | LFTKDVTVIEGEVATISCQVNSDSDSVIQLLNPNRQTIYFR  |
| Q9BY67 | RQTIYFRDFRPLKDSRFQLLNFSSSELKVSLTNVSI SDEGR |
| Q9BY67 | KDSRFQLLNFSSSELKVSLTNVSI SDEGRYFCQLYTDPPQE |
| Q9BY67 | RNLMIDIQKDTAVEGEEIEVNCTAMASKPATTIRWFKGNT   |
| Q9BY67 | VRVDEMPQHAVLSGPNLFINNLNKTDNGTYRCEASNIVGK   |
| Q9BY67 | RVVDEMPQHAVLSGPNLFINNLNKTDNGTYRCEASNIVGKA  |

|        |                                            |
|--------|--------------------------------------------|
| Q9BY67 | DDEMPQHAVLSGPNLFINNLNKTDNGTYRCEASNIVGKAHS  |
| Q9BY67 | PQHAVLSGPNLFINNLNKTDNGTYRCEASNIVGKAHS DYML |
| Q8R5M8 | LFTKDVTVIEGEVATISCVNKSDDSVIQLLNPNRQTIYFR   |
| Q8R5M8 | RQTIYFRDFRPLKDSRFQLLNFSSELKVSLTNVSI SDEGR  |
| Q8R5M8 | KDSRFQLLNFSSELKVSLTNVSI SDEGRYFCQLYTDPPE   |
| Q8R5M8 | RNLMIDIQKDTAVEGEEIEVNCTAMASKPATIRWFKGNKE   |
| Q8R5M8 | VRVDEMPQHAVLSGPNLFINNLNKTDNGTYRCEASNIVGK   |
| Q8R5M8 | DDEMPQHAVLSGPNLFINNLNKTDNGTYRCEASNIVGKAHS  |
| Q8R5M8 | PQHAVLSGPNLFINNLNKTDNGTYRCEASNIVGKAHS DYML |
| Q8BLQ9 | FYSVCGLLQGSQGQFPLTQNVTVVEGGTAILTCRVDQNDN   |
| Q8BLQ9 | NVTVVEGGTAILTCRVDQNDNTSLQWSNPAQQTL YFDDKKA |
| Q8BLQ9 | PDRMVVSGRELNILFLNKTDNGTYRCEATNTIGQSSAEYVL  |
| Q8N126 | EGSVPLKMTQESALIFPFLNKSDSGTYGCTATSNMGSYKA   |
| 075493 | GTLTYNTGRHVSFLPAPRPVVNVSGGPLLYSHRLELRLLFG  |
| 075493 | NHQGFSAEVQLIHFNQELYGNFSAASRGPNGLAILSLFVNV  |
| 075493 | SLSTPPCSETVTWILIDRALNITS LQMHSRLLSQNPSSI   |
| Q9WVT6 | VPPFSVRELFPPQLEQFFRYNGSLTTPPCYQSVLWTVFNRR  |
| Q9ULX7 | VPPFNRELLPKQLGQFRYNGSLTTPPCYQSVLWTVFYRR    |
| P20507 | KGSKIANGLQTQWSYPDLMSNGTSVQVINNGHTIQVQWTYN  |
| P20507 | QVQWTYNYAGHATIAIPAMHNQTNRIVDVLEMRPNDAADR   |
| P20507 | QRISFGQWNRYLAVGLKECNSTETAADAGHHHHRRLLHN    |
| Q18932 | VELRRLTVASQSINVKGQTTNLTDFQPSALLPKTSHYVTYE  |
| P18915 | QSPI DLKMKKVRYNPSLRALNLTGYGLRQGEFPMTNNGHTV |
| P18915 | TVKLSKTQIEKLENSLLNHQNETIQNNYRSTQPLNHRVVEA  |
| P08060 | QSPIDLQMKKVQYNPSLRALNLTGYGLWHGEFPVTNNNGHTV |
| P08060 | TVKLSKTQVEKLENSLLNHQNKTIQNDYRRQPLNHRVVEA   |
| Q16790 | QYEGSLTTPCAQGVIVTWFNQTVMLSAKQLHTLSDTLWGP   |
| Q8IU99 | LDGKCFLCAFACTAVPVSALGNGSLAPGLPAPELARLLARVP |
| P52193 | KDIRCKDDEFTHLYTLIVRPNNYEVKIDNSQVESGLED     |
| P27797 | GTIFDNFLITNDEAYAEFFGNETWGVTKAAEKQMKDKQDEE  |
| 043852 | RQWKGHDLNEDGLVSWEEYKNATYGYVLDDPDDGDFNYKQ   |
| P34652 | PDKCGATGKVHLIFRYKNFINGTISEYHANQPTTIGSTYWD  |
| P34652 | GSQSNPEPQDEEENAEQQSANSQSAAEEEDDEHVVPENE    |
| P80015 | QLDREARLTPSVALVPLPPQNAVTEAGTNCQVAGWGTQRLR  |
| P80015 | VAGWGTQRLRRLFSRFRVNLNVTVTSNPCLPRDMCIGVFSR  |
| P20160 | GYDPQQNLNDLMLLQLDREANLTSVTTILPLPLQNAVTEAG  |
| P20160 | QLDREANLTSVTTILPLPLQNAVTEAGTRCQVAGWGSQRSG  |
| P20160 | VAGWGSQRSGGRLSRFRFVNVTVTPEDQCRPNNVCTGVLT   |
| Q9XFX3 | SKACRAHSMYESSDSSTYKENGTFGAI IYGTGSITGFFSQD |
| Q9XFX3 | HLSTSSEELQVDCNTLSSMPNVSF TIGGKKFGLTPEQYILK |
| P09177 | VFSVMNTNDGGGQVFFGANNTLLGGDIQYTDVLKSRGGY    |

|        |                                              |
|--------|----------------------------------------------|
| P07267 | SLACFLHSHKYDHEASSSYKANGTEFAIQYGTGSLEGYISQD   |
| P07267 | TLDCNTRDNLPDLIFFNNGYNFTIGPYDYTLEVSGSCISAI    |
| P00799 | GSRFFDPSASSTFKATNYNLNIYGTGGANGLYFEDSIAIG     |
| P00799 | LFSVYMNTNSGTGEVVFVGGVNNLTLGGDIAYTDVMSRYGGY   |
| P07221 | VPYWEKTFDIDLAPQIGVVNVTADSVMMEMDDEEDLPSA      |
| P07688 | LYNSHVGCRPYSIPPCEHHVNGSRPPCTGEGDTPKCSKTCE    |
| P07858 | LYESHVGCPRYSIPPCEHHVNGSRPPCTGEGDTPKCSKICE    |
| A1E295 | LYDSHVGCRPYSIPPCEHHVNGSRPPCTGEGDTPKCSKICE    |
| P00787 | VYNSHIGCLPYTIPPCEHHVNGSRPPCTGEGDTPKCNKME     |
| P53634 | LAALLLLSGDGAVRCDT PANCTYLDLLGTWVFQVGSQ       |
| P53634 | LDLLGTWVFQVGSQQRDVNCSVMGPQEKVVVYLQKLDL       |
| P53634 | YKWF AFFKYKEEGSKVTTYCNETMTGWVHDLGRNWACFTG    |
| P53634 | GSCYSFASMGMLEARIRILTNNSTPILSPQEVVSCSQYAQ     |
| P80067 | RAALLVLLGVCTVSSDT PANCTYDLLGTWVFQVGRHPR      |
| P80067 | PDLLGTWVFQVGRHPRSHINCSVMEPTTEKVVVHLLKLDL     |
| P80067 | GWVHDLGRNWACFVGKKMANHSEKVVVVAHLGGLQEKYS      |
| P80067 | GSCYSFASLGMLEARIRILTNNSTPILSPQEVVSCSPYAQ     |
| P07339 | DIACWVHHKYNSDKSSTYVKNGTSDIHYGSGSLSGYLSQD     |
| P07339 | GELMLGGTDSKYKGLSLSYLVNTRKAYWQVHLDQVEVASGL    |
| P18242 | DIACWVHHKYNSDKSSTYVKNGTSDIHYGSGSLSGYLSQD     |
| P18242 | GELMLGGTDSKYHGLSLSYLVNTRKAYWQVHMDQLEVGNEL    |
| P00795 | DIACWVHHKYNSGKSSTYVKNGTTFAIHYGSGSLSGYLSQ     |
| P00795 | GELMLGGIDSKYYKGLSDYHNVTRKAYWQIHMQVAVGSSL     |
| P14091 | LINYLDMEYFGTISIGSPPQNFVIFDGTSSNLWVPSVYCT     |
| Q9UBX1 | AFTQGSAMISLSQNHDPNRNETFSSVISLLNEDPLSQDLP     |
| Q9UBX1 | LSQDLPVKMASIFKNFVITYNRTYESKEEARWRLSVFVNNM    |
| Q9UBX1 | NLGGLETEDDYSYQGHMQSCNFSAEKAKVYINDSVELSQNE    |
| Q9UBX1 | SYQGHMQSCNFSAEKAKVYINDSVELSQNEQKLAAWLAKRG    |
| Q9UBX1 | LRPLCSPWLIDHAVLLVGYGNRSDVPFWAIKNSWGTDWGEK    |
| P08311 | GFLVREDFVLTAAHCWGSNINVTLAGAHNIQRRENTQQHITA   |
| P09668 | QFSDMSFAEIKHKYLWSEFQNCATKSNYLRTGYPYPPSVD     |
| P09668 | KDGYCKFQFGKAIGFVKDVANITIIYDEEAMVEAVALYNPVS   |
| P00786 | KNGQCKFNPEKAVAFVKNVVNITLNDEAMVEAVALYNPVS     |
| P09648 | YPYTAKDDEDCRYKAEYNAANDTG FVDI PQGHERALMKAVA  |
| Q9GKL8 | SYPYEATEESCKYNPEYSVANDTG FVDI PKQE KALMKAVAT |
| P07711 | SYPYEATEESCKYNPKYSVANDTG FVDI PKQE KALMKAVAT |
| P06797 | SYPYEAKDGSCKYRAEFAVANDTG FVDI PQQE KALMKAVAT |
| P07154 | SYPYEAKDGSCKYRAEYAVANDTG FVDI PQQE KALMKAVAT |
| O60911 | SYPYVAVDEICKYRPENS VANDTGFTVVAPGKEKALMKAVA   |
| O60911 | SKNLDHGLVVGYGFEGANSNSKYWLKNSWGP EWG SNGY     |
| Q9UBR2 | CDKFNQCGTCNEFK ECHAIRNYTLWRVGDYGSLSGREKMA    |

|        |                                            |
|--------|--------------------------------------------|
| Q9UBR2 | AEIYANGPISCGIMATERLANYTGGIYAEBYQDTTYINHVV  |
| Q06770 | LAMLSTLRGSTQYLENLGFNMSKMSEAEIHQGFQYLNLL    |
| Q06770 | LTIPSKDWTKAGEQINNHHVKNKTQGKIEHVVDLSSATLI   |
| Q06770 | KGIWKLPFSPENTREEDFYVNETSTVKVPMVQSGNISYFR   |
| Q06770 | EDFYVNETSTVKVPMVQSGNISYFRDSAIPCQVMQMNIVG   |
| Q06770 | ISYFRDSAIPCQVMQMNIVGNGTTFIILPDQGQMDTVVAAL  |
| Q06770 | SDTYDLQDVLADVGIKDLFTNQSDFADTTKDTPLTLTVLHK  |
| P08185 | WLPTSGLWTVQAMPNAAYNMSNHHRGLASANVDFAFSLY    |
| P08185 | MLSLGTCGHTRAQLLQGLGFNLTERSETEIHQGFQHLHQLF  |
| P08185 | LAMNFQDWATASRQINSYVKNKTQGKIVDLFSGLDSPAIV   |
| P08185 | ISYLDHSELPCQLVQMNIVGNGTVFFIILPDGKGMNTVIAAL |
| P08185 | YDLGDVLEEMGIADLFTNQANFSRITQDAQLKSSKVVHKAV  |
| P08185 | AVLQLNEEGVDTAGSTGVTLNLTSPKPIILRFNQPFIIMIFD |
| Q9R171 | GVVELLLGTAWLAGPARGQNETEPIVLEGGKLVVCDNSPT   |
| Q9R171 | SAKVAFSAIRSTNHEPSEMSNRTMIIYFDQVLVNIIGNFDS  |
| Q8BME9 | RALSVPVAVLLILVLPVWAQNDTEPIVLEGGKLVVCDNSPA  |
| Q8BME9 | NSKVAFSAVRSTNHEPSEMSNKTRIIYFDQILVNVGNFFTL  |
| Q8BGU2 | GAVLALLLLLLPACCPVRAQNDTEPIVLEGGKLVVCDSSPS  |
| Q8BGU2 | SAKVAFSATRSTNHEPSEMSNRTMIIYFDQVLVNIIGNHFDL |
| P07519 | KVSTMIYLDSPAGVGLSYSKNVSDYETGDLKTATDSHTFLL  |
| P07519 | GLISDEIYQQASTSCHGNYWNATDGKCDTAISKIESLISGL  |
| P07519 | LCTDKLYFVHDAGSMIAYHKNLTSQGYRAIFSGDHDMCVP   |
| P08818 | NKVANVFLDPSAGVGFSTNTSSDIYTSQDNRTAHDSYAF    |
| P08818 | PAGVGFSTNTSSDIYTSQDNRTAHDSYAFLAAWFERFFHY   |
| P08818 | DVATAEQGNIDMYSLYTPVCNITSSSSSSSSLSRRRTRGRYP |
| P08818 | TERYSTAYNRRDVQALHANVTGAMNYTWTNCSDTINTHW    |
| P08818 | AYNRRDVQALHANVTGAMNYTWTNCSDTINTHWHDAPRS    |
| P08818 | RDVQALHANVTGAMNYTWTNCSDTINTHWHDAPRSMLPIY   |
| P21529 | PGCSSELAVFYENGPFITIANMSLVWNKFGWDKISNIIFVD  |
| P08819 | NKVANVFLDPSAGVGFSTNTSSDIYTSQDNRTAHDSYAF    |
| P08819 | PAGVGFSTNTSSDIYTSQDNRTAHDSYAFLAKWFERFFHY   |
| P08819 | DVATAEQGNIDMYSLYTPVCNITSSSSSSSSLSQRRSRG    |
| P08819 | TERYSTAYNRRDVQALHANVTGAMNYTWTNCSDTINTHW    |
| P08819 | AYNRRDVQALHANVTGAMNYTWTNCSDTINTHWHDAPRS    |
| Q9UI42 | KTRSRNPGSSCIGADPNRNWNASFAGKGASDNPCSEVYHGP  |
| Q2KIG3 | QRGQVLSALPRTSRQVQILQNVTTTYKIVLWQPVAAEYIVK  |
| Q2KIG3 | LWQPVAAEYIVKGYEVHFFVNASDVSNVKAHLNASRIPFRV  |
| Q2KIG3 | GYEVHFFVNASDVSNVKAHLNASRIPFRVLVENVEDLIRQQ  |
| Q2KIG3 | RIPFRVLVENVEDLIRQQTSNDTISPRASSSYEYHSLNE    |
| Q2KIG3 | PVVNVGDYDWTWKKDRMWRKNSLHEKNACVGTDLNRFAS    |
| Q96IY4 | QSGQVLAALPRTSRQVQVLQNLTTTYEIVLWQPVATDLIVK  |

|        |                                            |
|--------|--------------------------------------------|
| Q96IY4 | LWQPVTADLIVKKKQVHFFVNASDVNDVKAHLNVSGIPCSV  |
| Q96IY4 | KKQVHFFVNASDVNDVKAHLNVSGIPCSVLLADVEDLIQQQ  |
| Q96IY4 | GIPCSVLLADVEDLIQQQISNDTVSPRASASYEYQYHSLNE  |
| Q96IY4 | PVVNVGDYDYSWKKNRMRKNSFYANNHCIGTDLNRNFAS    |
| Q9JHH6 | QSGQVLSALPRTSRQVQLLQNLTTTYEVVLWQPVTAEFIEK  |
| Q9JHH6 | LWQPVTAEFIEKKKEVHFFVNASDVDSVKAHLNVSRIPFNV  |
| Q9JHH6 | KKEVHFFVNASDVDSVKAHLNVSRIPFNVLMNVEDLIEQQ   |
| Q9JHH6 | RIPFNVLMMNVEDLIEQQTFNDTVSPRASASYEYQYHSLNE  |
| Q9JHH6 | PVMNVGDYDYSWKKNRMRKNSAHKNNRCVGTDLNRNFAS    |
| Q9JHH6 | IKAYISMHSYSQQILFPYSYNRSKSKDHEELSLVASEAVRA  |
| P42787 | YMAQYLLGNHERISDLGQLVNSTDIYLVPTMNPAGYALSQE  |
| P42787 | KQLAHTYSDNHPIMRKGNNCNSFSGGITNGAHWYELSGGM   |
| P42787 | PQKLLKQFNGFLTPTKYEHNFAMESYLRAISSYPSLTR     |
| P42787 | ILTKYMLERYGNDDRITKLVNGTRMHFLYSMNPAGYALSQE  |
| P42787 | DQYGTDRFNKVTPEVAAMNWTLSLPPVLSANLHGGSLVA    |
| P42787 | ANYPFDDNENDFNDPFMRLRNSINGRKNPTEDNALFKHL    |
| P42787 | FVHSTIGTPIAGAVVRLDGANHSTYSQVFGDYWKALPGRH   |
| P42787 | HSTYSQVFGDYWKALPGRHNLTVLGDNYAPLRMEVEVPDV   |
| P42787 | VIYFLPQTSKFQNVFDMYNSNTSICDPVLGDELAERILGPE  |
| P42787 | DKGQPLREAYVRLLEHDIRIINVTKNVARQLMLPHGLYGLE  |
| P42787 | ESNHVPRNAKVSVVGTQLRNFTGSMGQYRISAVPLGITL    |
| O75976 | LARELAGYRRGDPRLVRLNNTDVYLLPFLNPDGFERARE    |
| O75976 | FGDGGPSGASGRDNRGRDLNRSFPDQFSTGEPPALDEVPE   |
| O75976 | KVHIGVKGFVKDSITGSGLENATISVAGINHNIITGRFGDF  |
| O75976 | DSITGSGLENATISVAGINHNIITGRFGDFYRLLVPGTYNL  |
| O75976 | HNITGRFGDFYRLLVPGTYNLTVVLTGYMPLTVTNVVVKE   |
| O75976 | HHHHPDMEIFLRRFANEYPNITRILYSLGKSVESRELYVME  |
| O75976 | MNPDGYEKSQEGDSISVIGRNNNSNFDLNRNFPDQFVQITD  |
| O75976 | QVHQVGRGFVLDATDGRGILNATISVAEINHVPVTTYKTGDY |
| O75976 | LVPPTYKITASARGYNPVTKNVTVKSEGAIQVNFVLRSSST  |
| O75976 | RGYNPVTKNVTVKSEGAIQVNFVLRSSSTDNSNESKKGKGA  |
| O75976 | KSEGAIQVNFVLRSSSTDNSNESKKGKGAASSSTNDASDFTT |
| O75976 | SYKDLSEFLRGLVMNYPHITNLNLGQSTEYRHIWSLEISN   |
| O75976 | NLGQSTEYRHIWSLEISNKPNSVSEPEPKIRFVAGIHGNAP  |
| O75976 | TSKIGQTNARGKDLDTDFTNNASQPETKAIENLIQKQDFS   |
| O75976 | LASLYANNHPSMHMGQPCPNKSDENIPGGVMRGAEWHSHL   |
| P83852 | MNPDGYEKSQEGDRGGTVGRNNSNNDLNRNFPDQFFQVTD   |
| P83852 | QVHRGIWGFVLDATDGRGILNATISVADINHVPVTTYKGDY  |
| O89001 | LARELAGYRRGDPRLVRLNNTDVYLLPFLNPDGFERARE    |
| O89001 | LGDSGPPGTSGRDNRGRDLNRSFPDQFSTGEPPSLDEVPE   |
| O89001 | KVHIGIKGFVKDSITGSGLENATISVAGINHNIITGRFGDF  |

|        |                                               |
|--------|-----------------------------------------------|
| 089001 | DSVTGSGLENATISVAGINHNIITGRFGDFHRLLVPGTYNL     |
| 089001 | HNITTRFRFGDFHRLLVPGTYNLALSTGYMPLTINNIMVKE     |
| 089001 | HHHHFPDMEIFLRRFANEYPNITRILYSLGKSVESRELYVME    |
| 089001 | MNPDGYEKSQEGDSISVVGRNNSNFDLNRNFPDQFVPI TE     |
| 089001 | QVHQGVKGFVLDATDGRGILNATLSVAEINHFPVTTYKAGDY    |
| 089001 | LVPGTYKITASARGYNPVTKNVTVRSEGAVQVNF TLVRSSA    |
| 089001 | RGYNPVTKNVTVRSEGAVQVNF TLVRSSADANNE SKKGRGH   |
| 089001 | RSEGAVQVNF TLVRSSADANNE SKKGRGHSTSDTSDPTS     |
| 089001 | SYKDLSEFLRGLVMNYPHITNLTTLGQSVEYRHIWSLE ISN    |
| 089001 | TLGQSVEYRHIWSLE ISNKPNI SEPEPKIRFVAGIHGNAP    |
| 089001 | TSKTGHTNAHGKDLDTDFTSNASQPETKAI IENLIQKQDFS    |
| 089001 | LASLYANNHPSMHMGQPCPNNSDENIPGGVMRGAEWSHL       |
| P14384 | LDENYHRQEGMEAF LKTVAQNYSSVTHLH SIGKSVKGRNLW   |
| P14384 | HLIDYLVTS DGKDPEITNLINSTRIHIMPSMNP DGFEAVKK   |
| P14384 | RENYNQYDLNRNFPDAFEYNNVSRQPETVAVMKWLKTEFV      |
| P14384 | YRTNKYGEYYLLLLPGSY I INVTVPGHDPHITKVI I PEKSQ |
| P14384 | VTVPGHDPHITKVI I PEKSNFSA LKKDILLPFQGGQLDSIP  |
| Q9Y646 | ASCGDVAKAI INLAVYGKAQNRSYERLALLVDTVGPRLSGS    |
| Q9Y646 | LQRRASEARGKIVVYNQPY INYSRTVQYRTQGAVEAAKVGA    |
| Q9Y646 | WTAEEQGGVGA FQYYQLHKVNI SNYSLVMESDAGTFLPTGL   |
| Q9Y646 | EEQGGVGA FQYYQLHKVNI SNYSLVMESDAGTFLPTGLQFT   |
| Q9Y646 | TGSEKARAIMEEVMSLLQPLNITQVLSHGEGTDINFWIQAG     |
| P00729 | ENYQLRVNKIKDPKILGIDPNVTQYTG YLDVEDEKHF FFW    |
| P00729 | GPSSIGPDLKPIGNPYSWNSNATVIFLDQPVNVGFSYSGSS     |
| P00729 | AGHYIPVFASEILSHKDRNFNLTSVLIGNGLTDPLTQYNY      |
| P00729 | AWTDVLPWKYDEEFASQVRNWTASITDEVAGEVKS YKHFT     |
| 054088 | KITIGVLLIIIFLLSII FTLENVSLAQTSPQISVYKVVSAD    |
| 054088 | GSADLSNPGSAGYWSQIPWTNISLTANI PMAPTSGLTHYLL    |
| 054088 | NI PMAPTSGLTHYLLVKAANGSWIFILEEWQAPEPAFNAW     |
| 054088 | WQAPEPAFNAWSTAVAGIYPNASGPGLFRMIELT PGTTYSL    |
| 054088 | GPGLFRMIELT PGTTYSLERNY TNYVSI INGKEETGRIVFN  |
| 054088 | NYTNYVSI INGKEETGRIVFNYSGITLPAPNNT EITVMSNG   |
| 054088 | GKEETGRIVFNYSGITLPAPNNT EITVMSNGTILLWHS PRP   |
| 054088 | FNYSGITLPAPNNT EITVMSNGTILLWHS PRPVEDL LYNDG  |
| 054088 | S PRPVEDL LYNDGMFYGYVNSTWYYPDRAAIMWYLGSGVP    |
| 054088 | SLAQSGGSANIWMWVSGATWNNSTYDPAFKSNIWQNESLTG     |
| 054088 | LAQSGGSANIWMWVSGATWNNSTYDPAFKSNIWQNESLTGL     |
| 054088 | SGATWNNSTYDPAFKSNIWQNESLTGLSYVDSGNHGFVAVPL    |
| 054088 | LTGLSYVDSGNHGFVAVPLYTNN TNMYEVDTAGIWTVPVASE   |
| 054088 | NMYEVDTAGIWTVPVASEGLNGSLFFIWTGAKYENG SWVVE    |
| 054088 | VASEGLNGSLFFIWTGAKYENG SWVVEFARPLSVPLDYQPF    |

|        |                                             |
|--------|---------------------------------------------|
| O54088 | WVVEFARPLSVPLDYQPFMPNITVGKTYVAFVWQGRIGE     |
| Q9NV96 | YRRNEDKPIAPCGAIANSMFNDTLELFLIGNDSYPIPIALK   |
| Q9NV96 | PCGAIANSMFNDTLELFLIGNDSYPIPIALKKKGIAWWTDK   |
| Q9NV96 | RLIERKSDLHPTLPAGRYSLNVTYNYPVHYFDGRKRMLST    |
| Q12127 | VDDVITQYTTWCPLTTEAPKNGTSTAAPVTSTEAPKNTTSA   |
| Q12127 | EAPKNGTSTAAPVTSTEAPKNTTSAAPTHSVTSYTGAAAKA   |
| Q6YHK3 | LLEHCPSQVTVKAEELLKTASNLTVSVLEAEGVFEKGSFKTL  |
| Q6YHK3 | ADEIYELRVGTGRTOEILFSNSTRLSFETKRISVFIQTDKA   |
| Q6YHK3 | PKFEVTLQTPLYCSMNSKHLNGTITAKYTYGKPVKGDVTLT   |
| Q6YHK3 | PVKGDVTLTFLPLSFWGKKKNIKTFFKINGSANFSFNDEEM   |
| Q6YHK3 | KQHDYIIEFFDYTTVLKPSLNFTATVKVTRADGNQTLLEER   |
| Q6YHK3 | TEYWSGSNSGNQKMEAVQKINYTVPQSGTFKIEFPFILEDSS  |
| Q6YHK3 | LKELSYMVVSARGQLVAVGKQNSTMFSLTPENSWTPKACVIV  |
| Q6YHK3 | MFMNSFAVFQECGLWVLT DANLTKDYIDGVYDNAEYAEFRM  |
| Q6YHK3 | IDVQESIHFLESEFSRGI SDNYTLALITYALSSVSGSPKAKE |
| Q6YHK3 | ETVKKVEYDHGKLNLYLDSVNETQFCVNI PAVRNFKVSNTQ  |
| P08571 | VSATTPEPCELDEDFRCVCFNSEPQPDWSEAFQCVCSAVEV   |
| P08571 | TMPPLEATGLALSSLRLRNVSATGRSWLAELQQWLKPG      |
| P08571 | RATVNPSAPRCMWSALNSLNSFAGLEQVPKGLPAKLRVL     |
| P08571 | DLSCNRLNRPQDELPEVDNLTLDGNPFLVPGTALPHEGS     |
| P10810 | VHASPAPPEPCELDEESCSNFSDPKPDWSSAFNCLGAADV    |
| P10810 | TAPPPLEATGPDNLNLRNVSWATRDRAWLAELQQWLKPG     |
| P10810 | LQQWLKPGKVLVLSIAQAHSNLSFCEQVRVFPALSTLDLSDN  |
| P10810 | SLRDAAGAPSCDWPSQLNSLNSFTGLKQVPKGLPAKLSVL    |
| P10810 | DLSYNRLDRNPSDELQVGNLSLKGPNFLDSESHSEKFNS     |
| Q13740 | RSSTKKSQYDDVPEYKDRNLNSENITLSISNARISDEKRF    |
| Q13740 | KKSQYDDVPEYKDRNLNSENITLSISNARISDEKRFVCM     |
| Q13740 | ETEQLKKGDCISEDSYPDGNITWYRNGKVLHPLEGAVV I    |
| Q13740 | PTEQVTIQVLPKNAIKEGDNITLCLGNGNPPPEEFLFYL     |
| Q13740 | PGQPEGIRSSNTYTLDVRRNATGDYKCSLIDKKSMAIATA    |
| Q13740 | EVTRQIGDALPVSCISASRNATVVMKDNIRLRSSPSFSS     |
| Q13740 | VEGFPKPAIQWTITGSGSVINQTEESPYINGRYSKIIISP    |
| Q13740 | QWTITGSGSVINQTEESPYINGRYSKIIISPEENVTLTCT    |
| Q13740 | EESPYINGRYSKIIISPEENVTLTCTAENQLERTVNSLNV    |
| Q13740 | ENVTLTCTAENQLERTVNSLNVSAISIPHEDEADEISDENR   |
| Q61490 | KKSQYDDVPEYKDRLSLSENITLSIANAKISDEKRFVCM     |
| Q61490 | ETDQLKKGDCISRDSYPDGNITWYRNGKVLQVVEGEVAIL    |
| Q61490 | PTEQVTIQVLPKNAIKEGDNITLQCLGNGNPPPEEFMFYL    |
| Q61490 | PGQPEGIRSSNTYTLDVRRNATGDYKCSLIDKRNMAASTT    |
| Q61490 | EVTQIGDTPVSCISASRNATVVMKDNIRLRSSPSFSS       |
| Q61490 | VEGFPKPAIHWITITGSGSVINQTEESPYINGRYSKIIISP   |



|        |                                              |
|--------|----------------------------------------------|
| Q61490 | HWTITGSGSVINQTEESPYINGRYSKIIISPEENVTLTCT     |
| Q61490 | EESPYINGRYSKIIISPEENVTLCTAENQLERTVNSLNV      |
| Q61490 | SPEENVTLCTAENQLERTVNSLNVSAISIPHEDEADDISD     |
| Q61490 | ENVTLCTAENQLERTVNSLNVSAISIPHEDEADDISDENR     |
| Q61490 | LNVSAISIPHEDEADDISDENREKVNDQAKLIVGIVVGLLL    |
| Q62192 | FLASCRATTSSDQKICIEKEVNKTYNCENLGLNEIPGTL PNS  |
| Q62192 | VNKTYNCENLGLNEIPGTL PNSSTECLEFSFNVLP TIQNTTF |
| Q62192 | TLPNSTECLEFSFNVLP TIQNTTFSRLINLTFDLTRCQIY    |
| Q62192 | LEFSFNVLP TIQNTTFSRLINLTFDLTRCQIYWIHEDTFQ    |
| Q62192 | QNNAIHYLSKEDMSSLQQA TNLSLNLNGNDIAGIELGAFDS   |
| Q62192 | FQSLNFGGTQNL LVIFKGLKNSTIQSLWLGTFEDMDEDIS    |
| Q62192 | FEGLCEMSVESINLQKHYFFNISSNTFHCFSGLQELDLTAT    |
| Q62192 | ELDLSHDDIETS DCCNLQLRNLSHLQSLNLSYNEPLSLKTE   |
| Q62192 | IETS DCCNLQLRNLSHLQSLNLSYNEPLSLKTEAFKECPQL   |
| Q62192 | RLKVKDAQSPFQNLHLLKVLNLSHSLDISSEQLFDGLPAL     |
| Q99467 | FSAGCKVITSWDQMCIEKEANKTYNCENLGLSEIPDTLPNT    |
| Q99467 | ANKTYNCENLGLSEIPDTLPNTTEFLEFSFNFLPTIHNRTF    |
| Q99467 | TLPNTTEFLEFSFNFLPTIHNRTFSRLMNLTFDLTRCQIN     |
| Q99467 | LEFSFNFLPTIHNRTFSRLMNLTFDLTRCQINWIHEDTFQ     |
| Q99467 | QNNAIHYISREDMRSLEQAINLSLNFNGNVKGIELGAFDS     |
| Q99467 | IELGAFDSTIFQSLNFGGTPNLSVIFNGLQNSTTQSLWLG T   |
| Q99467 | FQSLNFGGTPNLSVIFNGLQNSTTQSLWLGTFEDIDDEDIS    |
| Q99467 | TLDLSHNDIEASDCCSLQKLNLSHLQTLNLSHNEPLGLQSQ    |
| Q99467 | IEASDCCSLQKLNLSHLQTLNLSHNEPLGLQSQAFKECPQL    |
| Q99467 | RLHINAPQSPFQNLHFLQVLNLTFCFLDTSNQHLLAGLPVL    |
| Q99467 | NSINII SPRLLPILSQQSTINLSHNPLDCTCSNIHFLT WYK  |
| P25918 | LPCLPDSSFVSSEKLAWYRGNQSTPFLELSPGSPGLGLHVG    |
| P25918 | PGSPGLGLHVGS LGILLVIVNVSDHMGGFYLCQKRPPFKDI   |
| P25918 | DIWQPAWTVNVEDSGEMFRWNASDVRDLDCDLRNRSSGSHR    |
| P25918 | SGEMFRWNASDVRDLDCDLRNRSSGSHRSTSGS QLYVWAKD   |
| P25918 | KDHPKVGTKPVCAPRGSSLNQSLINQDLT VAPGSTLWLS C   |
| P25918 | PPVPVAKGSI SWTHVHPRRPNVSLLSL LGGEHPVREM WVW  |
| P25918 | LLLLPQATALDEGTY YCLRGNTIERHVKVIARS AVWLWLL   |
| P06126 | NADGLKEPLSFHVTWIASFYNH SWKQNLVSGWLS DLQHTW   |
| P06126 | WKQNLVSGWLS DLQHTWDSNSSTIVFLCPWSRGNFSNEEW    |
| P06126 | THTWDSNSSTIVFLCPWSRGNFSNEEWKELET LFRIRTIRS   |
| P06126 | KVSGSFLQLAYQGSDFVSFQNN SWLPYPVAGNMAKH FCKVL  |
| P29016 | SEHAFQGP TSFHVIQTSSFTNSTWAQTQGGWLDLQIHGW     |
| P29016 | IHWGSDSGT AIFLKPWSKGNFSDKEVAELEEIFRVYIFGF    |
| P29016 | GAIVSFLRGALGGLDFLSVKNASCVPSP EGGSR AQKFCALI  |
| P29016 | WMRGEQQGTQLGDILPNANWTWYL RATLDVADGEAAGLS     |

|        |                                              |
|--------|----------------------------------------------|
| P29017 | NADASQEHVFSFHVIQIFSFVNQSWARGQGGSGWLDELQTHGW  |
| P29017 | LDELQTHGWDESSEGTIIFLHNWSKGNFSNEELSDLELLFRF   |
| P29017 | THGWDESSEGTIIFLHNWSKGNFSNEELSDLELLFRFYLFGL   |
| P29017 | WDESSEGTIIFLHNWSKGNFSNEELSDLELLFRFYLFGLTRE   |
| P29017 | KSPEGFFQVAFNGLDLSFQNTTWVPSPGCGSLAQSVCHLL     |
| P11609 | PWLLWAFLQVWGQSEAQQKNYTFRCLQMSSFANRSWSRTD     |
| P11609 | QSEAQQKNYTFRCLQMSSFANRSWSRTDSVVWLGDLQTHRW    |
| P11609 | SWSRTDSVVWLGDLQTHRWSNDSATISFTKPWSQKLSNQQ     |
| P11609 | PKEDYPIEIQLSAGCEMYPGNASESFLHVAFGKYVVRFWG     |
| P11609 | LPKVLNADQGTSA TVQMLLNDTCPLFVRG LLEAGKSDLEK   |
| P15813 | SAEVPQRLFP L RCLQISSFANS SWTRTDGLAWLGELQTHSW |
| P15813 | SWTRTDGLAWLGELQTHSWSNDSDTVRS LK PWSQGTFS DQQ |
| P15813 | LRLSYPLELQVSAGCEVHPGNASNFFHVAFQ GKDILSFQG    |
| P15813 | LAIQVLNQDKWTRET VQWLLNGTCPQFVSG LLES GKSELKK |
| Q9BZW8 | IAWKKLLPSQNGFH HILKWENGLSPSNTS NDRFSFIVKNLS  |
| Q9BZW8 | LPSQNGFH HILKWENGLSPSNTS NDRFSFIVKNLS LLIKAA |
| Q9BZW8 | WENGLSPSNTS NDRFSFIVKNLS LLIKAAQQQDSGLYCLEV  |
| Q9BZW8 | KILDRGRQCVALSCLVSRDGNVSYAWYRGS KLIQTAGNLTY   |
| Q9BZW8 | RDGNVSYAWYRGS KLIQTAGNLTYLDEEVDINGTHTYTCNV   |
| Q9BZW8 | GSKLIQTAGNLTYLDEEVDINGTHTYTCNVS NPVSWESHTL   |
| Q9BZW8 | GNLTYLDEEVDINGTHTYTCNVS NPVSWESHTLNLTDQCQN   |
| Q9BZW8 | GTHTYTCNVS NPVSWESHTLNLTDQCQNAHQEF RFWPFLVI  |
| P24807 | ARLGLGLLL LLLPTQIYCNQTSVAPFPGNQNI SASPNPS    |
| P24807 | LLPTQIYCNQTSVAPFPGNQNI SASPNPSNATTRGGGSSLQ   |
| P24807 | QTSVAPFPGNQNI SASPNPSNATTRGGGSSLQSTAGLLALS   |
| Q8VE98 | DQGSAYANRTALFPDLLAQGNASLRLQRVRVADEGSFTCFV    |
| Q8VE98 | QGYPEAEVFWKDGQGVPLTGNVTT SQMANERGLFDVHSVLR   |
| Q8VE98 | FWKDGQGVPLTGNVTT SQMANERGLFDVHSVLRVVLGANGT   |
| Q8VE98 | MANERGLFDVHSVLRVVLGANGTYSCLVRNPVLQDAHGSV     |
| Q5ZPR3 | DQGSAYANRTALFPDLLAQGNASLRLQRVRVADEGSFTCFV    |
| Q5ZPR3 | QGYPEAEVFWQDGQGVPLTGNVTT SQMANEQGLFDVHSILR   |
| Q5ZPR3 | MANEQGLFDVHSILRVVLGANGTYSCLVRNPVLQDAHSSV     |
| Q5ZPR3 | DQGSAYANRTALFPDLLAQGNASLRLQRVRVADEGSFTCFV    |
| Q5ZPR3 | RGYPEAEVFWQDGQGVPLTGNVTT SQMANEQGLFDVHSVLR   |
| Q5ZPR3 | MANEQGLFDVHSVLRVVLGANGTYSCLVRNPVLQDAHGSV     |
| P26842 | HHTRPHCESCRHCNSGLLVRNCTITANAECACRNGWQCRDK    |
| P10747 | TGNKILVKQSPMLVAYDNAVNLSCKYSYNLFSREFRSLHK     |
| P10747 | FRASLHKGLDSAVEVCVVYGNYSQQLQVYSKTFNC DGKLG    |
| P10747 | YSQQLQVYSKTFNC DGKLGNESVTFY LQNLVYNQTDIYFC   |
| P10747 | NCDGKLGNESVTFY LQNLVYNQTDIYFCKIEVMYPPPYLDN   |
| P10747 | IYFCKIEVMYPPPYLDNEKSNGTI IHVKGKHLCPSP LFPGP  |

|        |                                             |
|--------|---------------------------------------------|
| P06729 | AQFRKEKETFKKEDTYKLFKNGTLKIKHLKTDQDIYKVSI    |
| P06729 | IFDLKIQERVSKPKISWTCINTTLTCEVMNGTDPELNLYQD   |
| P06729 | VSKPKISWTCINTTLTCEVMNGTDPELNLYQDGKHLKLSQR   |
| P08921 | ILANGDLKIKNLTRDSDGTYNVTVYSTNGTRILDKALDLRI   |
| P08921 | KIKNLTRDSDGTYNVTVYSTNGTRILDKALDLRILEMVSKP   |
| P08921 | ALDLRILEMVSKPMIWECSNATLTCEVLEGTDVELKLYQG    |
| P26201 | TDVYRQFWIFDVQNPDEVTVNSSKIKVKQRGPYTYRVRYLA   |
| P26201 | KIKVKQRGPYTYRVRYLAKENITQDPETHTVSFLQPNGAIF   |
| P26201 | TFMQGIILNSFIKKSMSFQNRTLKELLWGYTDPFLNLVPY    |
| P26201 | PFLNLVPYPITTTIGVFYPYNNADGIYKVFNGKDDISKVA    |
| P26201 | FNGKDDISKVAIIDTYKGRKNLSYSSYCDLINGTDAASFP    |
| P26201 | IDTYKGRKNLSYSSYCDLINGTDAASFPFVEKTRVLQFF     |
| P26201 | ASPFQPNPNHCFCTEKIISKNCTLYGVLDIGKCKEKGKPYI   |
| P26201 | KKIEALKNLKHNYIVPILWLNETGTIGDEKAEMFRNQVTGK   |
| Q64314 | NLTSATTESTQGISPSVPTNESVEENITSSIPGSTSHYLI    |
| Q64314 | TETSTQGISPSVPTNESVEENITSSIPGSTSHYLIYQDSSK   |
| Q64314 | HYLIYQDSSKTTPAISETMVNFTVTSGIPSGSGTPHTFSQP   |
| Q64314 | TTSDSISTSEMTWKSSLPSINVS DYSPNNSFEMTSPTPEY   |
| Q64314 | TSEMTWKSSLPSINVS DYSPNNSFEMTSPTPEYAYTSSSA   |
| Q64314 | SEMTWKSSLPSINVS DYSPNNSFEMTSPTPEYAYTSSSAP   |
| Q64314 | CSSLQAQSEVRPECLLMVLANSTELPSKLQLMKQSDLRK     |
| P16671 | TEVYRQFWIFDVQNPQEVMMNSNIQVKQRGPYTYRVRFLA    |
| P16671 | NIQVKQRGPYTYRVRFLAKENVTQDAEDNTVSFLQPNGAIF   |
| P16671 | FLQPNGAIFEPSLSVGTADNFTVLNLVAAAASHIYQNQFV    |
| P16671 | AAASHIYQNQFVQMIILNSLINKSKSMFQVRTLRELLWGYR   |
| P16671 | PFLSLVPYPVTTTVGLFYPYNNADGVYKVFNGKDNISKVA    |
| P16671 | LFYPYNNADGVYKVFNGKDNISKVAIIDTYKGRKNLSYWE    |
| P16671 | FNGKDNISKVAIIDTYKGRKNLSYWESHCDMINGTDAASFP   |
| P16671 | IDTYKGRKNLSYWESHCDMINGTDAASFPFVEKSQVLQFF    |
| P16671 | ASPVENPDNYCFCTEKIISKNCTSYGVLDISKCKEGRPVYI   |
| P16671 | EKIQLKLNKRNYIVPILWLNETGTIGDEKANMFRSQVTGK    |
| P28907 | VDCQSVWDAFKGAFISKHFCNITEEDYQFLMKLGTQTVFCN   |
| P28907 | TLEDTLGLYLADDLTWCGEFNTSKINYQSCPDRKDCSNNP    |
| P28907 | WKTVSRFAEAACDVVHVMLNGSRSKIIFDKNSTFGSVEVHN   |
| P28907 | AACDVVHVMLNGSRSKIIFDKNSTFGSVEVHNLQPEKVQMLE  |
| P29965 | QQSIHLGGVFEHQPGASVFNVTDPQSQVSHGTGFTSFGLLK   |
| P16070 | WWHAAWGLCLVPLSLAQIDLNITCRFAGVFHVEKNGRYSIS   |
| P16070 | EKNGRYSISRTEAADLCKAFNSTLPTMAQMEKALSIGFETC   |
| P16070 | GFIEGHVVIPIRIHPNSICAAANTGVYILTSNTSQYDITYCFN |
| P16070 | RIHPNSICAAANTGVYILTSNTSQYDITYCFNASAPPEEDCT  |
| P16070 | NNTGVYILTSNTSQYDITYCFNASAPPEEDCTSVTDLNPAFD  |

|        |                                             |
|--------|---------------------------------------------|
| P16070 | SHSNPEVLLQTTTRMTDVRNGTTAYEGNWNPEAHPPLIHH    |
| P16070 | TTSTLTSSNRNDVTGGRDPNHSEGSTTLLEGYTSHPHTK     |
| P16070 | AKTGSFGVTAVTVGDSNSNVNRSLSGDQDTFHPSGGSHTTH   |
| P16070 | HTTHGSESDGSHSGSQEGGANTTSGP IRTPQIPEWLIILAS  |
| Q08722 | PLVAALLLGSACCGSAQLLFNKTKSVEFTFCNDTVVIPCFCV  |
| Q08722 | CCGSAQLLFNKTKSVEFTFCNDTVVIPCFCVTNMEAQNTTEV  |
| Q08722 | FTFCNDTVVIPCFCVTNMEAQNTTEVYVKKFKGRDIYTFDG   |
| Q08722 | EVYVKKFKGRDIYTFD GALNKSTVPTDFSSAKIEVSQLLK   |
| Q08722 | LLKGDASLKMDSKSDAVSHTGNYTCEVTELTREGETI IELKY |
| Q08722 | ITVIVIVGAILFVPGEYSLKNATGLGLIVTSTGILILLHY    |
| P09326 | SLLVTSIQGHLVHMTVVSGSNVTLNISESLPENYKQLTWFY   |
| P09326 | TSIQGHLVHMTVVSGSNVTLNISESLPENYKQLTWYTFDQ    |
| P09326 | RVRLDPQSGALYISKVQKEDNSTYIMRVLKKTGNEQEWKIK   |
| P09326 | EDMDDNCYLKLSCVIPGESVNYTWYGDKRPFPPKELQNSVLE  |
| P09326 | GESVNYTWYGDKRPFPPKELQNSVLETTLMPHNYSRCYTCQV  |
| P09326 | KRPFPPKELQNSVLETTLMPHNYSRCYTCQVSNVSSKNGTV   |
| P10252 | SLVTGFQDQSVPNVNAITGSNVTLTILKHPLASYQRLTWLH   |
| P10252 | ESVFKDRVDLTKTNGALRIYNVSKEDRGDYMRMLHETEDQ    |
| P10252 | ITMEVYDLVSKPAIKIEKTKNLTDSCHLRLSCKVEDQGVYD   |
| P10252 | SGPFPQRNPGYVLEITITPHNKSTFYTCQVSNPVSSENDTL   |
| P10252 | TFHNKSTFYTCQVSNPVSSENDTLYFIPPCTLARSSGVHWI   |
| P01730 | KKLPLHLTLPQALPQYAGSGNLTALAEAKTGKLGHEVNLVV   |
| P01730 | TGKLGHEVNLVVMRATQLQKNLTCEVWGPTSPKMLLSLKLE   |
| P05540 | VKDSKAFSTHSLRIQDSGIWNCTVTLNQKKHSFDMKLSVLG   |
| P05540 | ETLPLTLQIPQVSLQFAGSGNLTLDLDRGILYQEVNLVVMK   |
| P05540 | LSEGEVVMKMSKIQVLSKGLNQTMLAVVLGSAFSLVFTG     |
| P31358 | LLLTISLLVMVQIQTGLSGQNDTSQTSSPSASSNISGGIFL   |
| P31358 | QTGLSGQNDTSQTSSPSASSNISGGIFLFFVANAI IHLFCF  |
| P13987 | GHSLQCYNCPNPTADCKTAVNCSSDFDACLITKAGLQVYNK   |
| P13987 | SDFDACLITKAGLQVYNK CWKFEHCNFNDVTTRLRENELTY  |
| P13987 | DACLITKAGLQVYNK CWKFEHCNFNDVTTRLRENELTYCC   |
| P41731 | VEVAVAIAGYVFRDQVKSEFNKSFQQMQNYLKDKNKTATIL   |
| P41731 | QVKSEFNKSFQQMQNYLKDKNKTATILDKLQKENNCCGASN   |
| P41731 | NKTATILDKLQKENNCCGASN YTDWENIPGMAKDRVPDSCC  |
| P41731 | TDWENIPGMAKDRVPDSCC INITVCGGNDFKESTIHTQGCV  |
| P34810 | GTTSHGPTTATHNPTTTSHGNTVHPTSNSSTATSQGPSTAT   |
| P34810 | TATHNPTTTSHGNTVHPTSNSSTATSQGPSTATHSPATTSH   |
| P34810 | TATSQGPSTATHSPATTSHGNATVHPTSNSSTATSPGFTSSA  |
| P34810 | TATHSPATTSHGNATVHPTSNSSTATSPGFTSSAHPPEPPPS  |
| P34810 | PPSPSPSPTSKETIGDYTWTNGSQPCVHLQAQIQIRVMYTT   |
| P34810 | RVMYTTQGGGEAWGISVLPNPKTKVQGSCEGAHPHLLSFP    |

|        |                                             |
|--------|---------------------------------------------|
| P34810 | GFMQDLQKVVYLSYMAVEYNVSPHAAQWTFSAQNASLRD     |
| P34810 | MAVEYNVSPHAAQWTFSAQNASLRDLQAPLGQSFSCSNSS    |
| P34810 | AQNASLRDLQAPLGQSFSCSNSSIILSPAVHLDLLSLRLQA   |
| P08962 | KVMSEFNNFRQQMENYPKNNHTASILDRMQADFKCCGAAN    |
| P08962 | NHTASILDRMQADFKCCGAANYTDWEKIPSMSKNRVPDSCC   |
| P08962 | TDWEKIPSMSKNRVPDSCCINVTVGCGINFNEKAHKEGCV    |
| P30203 | TGLLTAALSGHPSAPPDQLNTSSAESELWEPGERLPVRLT    |
| P30203 | TSSAESELWEPGERLPVRLTNGSSSCSGTVEVRLEASWEPA   |
| P30203 | EAASQLAPPTPELPPPPAAGNTSVAANATLAGAPALLCSGA   |
| P30203 | APPTPELPPPPAAGNTSVAANATLAGAPALLCSGAEWRLCE   |
| P30203 | QALPGLHFTPGRGPIHRDQVNCSGAEAYLWDCPGLPGQHYC   |
| P30203 | PHLSGRMYSCNGEELTNSNCSWRFNNSNLCSQSLAARVL     |
| P30203 | RMYYSCNGEELTNSNCSWRFNNSNLCSQSLAARVLCASRS    |
| P30203 | NLCSQSLAARVLCASRSLHNLSTPEVPASVQTVTIESSVT    |
| P09564 | AAQEVQQSFHCTTVPVGSVNITCSTSGGLRGIYLRQLGPQ    |
| P09564 | VVPTDRRFRGRIDFSGSQDNLTIIMHRLQLSDTGTYTQCA    |
| Q00609 | HDKVVLSVIAGKLVWPEYKNRTLYDNNTYSLIILGLVLS     |
| Q00609 | SVIAGKLVWPEYKNRTLYDNNTYSLIILGLVLSDRGTYS     |
| Q00609 | YEVKHLALVKLSIKADFSTPNITESGNPSADTKRITCFASG   |
| Q00609 | ALVKLSIKADFSTPNITESGNPSADTKRITCFASGGFPKPR   |
| Q00609 | GGFPKPRFSWLENGRELPGINTTISQDPESELYTISSQLDF   |
| Q00609 | TTISQDPESELYTISSQLDFNTRNHTIKCLIKYGAHVSE     |
| Q00609 | QDPESELYTISSQLDFNTRNHTIKCLIKYGAHVSEFTW      |
| P33681 | SGVIHVTKEVKEVATLSCGHNVSEELAQTRIYWQKEKMMV    |
| P33681 | EKKMVLTMMSGDMNIWPEYKNRTIFDITNNLSIVILALRPS   |
| P33681 | SGDMNIWPEYKNRTIFDITNNLSIVILALRPSDEGTYEVCV   |
| P33681 | GGFPEPHLSWLENGEELNAINTVSQDPETELYAVSSKLD     |
| P33681 | TTVSDPETELYAVSSKLDNMTTNHSFMCLIKYGHRLVNQ     |
| P33681 | QDPETELYAVSSKLDNMTTNHSFMCLIKYGHRLVNQTFNW    |
| P33681 | FNMTTNHSFMCLIKYGHRLVNQTFNWNNTKQEHFPDNL      |
| P33681 | HSFMCLIKYGHRLVNQTFNWNNTKQEHFPDNLPSWAITLI    |
| P27701 | NMGKIQEMGGIVTELIRDYNSREDSLQDAWDYVQAQVKC     |
| P27701 | QDAWDYVQAQVKCCGWVSFYNWDNAELMNRPEVTPCSCE     |
| P27701 | VKGEEDNSLSVRKGFCEAPGNRTQSGNHPEDWPVYQEGCME   |
| Q01151 | RMETPQEDHLRGQYHQKQNGSFDAPNERPYSKIRNTTS      |
| Q01151 | DHLRGQYHQKQNGSFDAPNERPYSKIRNTTSCNSGTYS      |
| Q01151 | KGQNGSFDAPNERPYSKIRNTTSCNSGTYSRCTLQDPDGQR   |
| Q01151 | TTSCNSGTYSRCTLQDPDGQRNLSGKVIILRVTGCPAQRKEET |
| P40237 | YFNADKLLKEMGNTVMDIIRNYTANATSSREEAWDYVQAQV   |
| P40237 | DKLLKEMGNTVMDIIRNYTANATSSREEAWDYVQAQVKCCG   |
| P40237 | EEAWDYVQAQVKCCGWVSHYNWTENEELMGFTKTTYPCSC    |

|        |                                               |
|--------|-----------------------------------------------|
| P40237 | DYVQAQVKCCGWVSHYNWTENEELMGFTKTTYPCSEKIKE      |
| P40237 | EKIKEEDNQLIVKKGFCADNSTVSENNPEDWPVNTGECME      |
| P07725 | VKLTCEVLRDTSQGCSWLFNRNSSSELLQPTFI IYVSSRSK    |
| P01731 | VDLVCEVLGSVSGGCSWLFQNSSKLPQPTFVVYMASSHNK      |
| P01731 | PTFVVYMASSHNKITWDEKLNSSKLF SAMRDTNNKYVLT LN   |
| P01731 | SVISNSVMYFSSVVPVLQKVNSTTKPVLRTFSPVHPTGTS      |
| P48960 | LTLPGAETQDSRGCARWCPQNSSCVNATAACRCNPGFSSFSE    |
| P48960 | AETQDSRGCARWCPQNSSCVNATAACRCNPGFSSFSE IITTP   |
| P48960 | SYDCVCSPGYEFVSGAKTFKNESENTCQDVDECCQNPRLCK     |
| P48960 | SYQCRCRPGWQPIPGSPNGPNNTVCEDVDECSSGQHQCDS      |
| P48960 | TYISPSNTELTLMIQERGDKNVTMGQSSARMKLNWAAGA       |
| P48960 | AVAAGAEDPGPAVAGILSIQNMTLLANASLNLSKKAEL        |
| P48960 | DPGPAVAGILSIQNMTLLANASLNLSKKAEL EEEIYESS      |
| P48960 | SIRGVQLRRLSAVNSIFLSHNNTKELNSPILFAF SHLESSD    |
| P48960 | SDSDRGGHWATEGCQVLGSKNGSTTCQCSHLS SFAILMAHY    |
| Q9Z0M6 | QKAESKNC AKWCPIN SKCVSNRSCVCKPGFSSEKELITNPA   |
| Q9Z0M6 | SYTCVCNLGYKLLSGAESFVNESENTCQASVNTGTTVPVSR     |
| Q9Z0M6 | PVSTVCE DVDECSSGQHQC HNSTVCKNTVGSYKCHCRPGWK   |
| Q9Z0M6 | LLRF SVEVQNL RDFNPATVNYTIQK LIEAVDKLEDPMET    |
| Q9Z0M6 | HGQTMELDWA VTAGAKI SENGSSVAGILSSPNMEKLLGNT    |
| Q9Z0M6 | TAGAKI SENGSSVAGILSSPNMEKLLGNTPLNLEQRRASLE    |
| Q9Z0M6 | LLSNINSVFLTNTNTEKLASNVTFKFDFTSVESIEPRHELI     |
| Q9Z0M6 | CAFWKAHNGNGYWDTDGCSMNGTGFC HCNHLTSFAILMAQY    |
| Q9HBB8 | MAQAQYCSVNKDI FEVEENTNVTEPLVDI HVPEGQEVTLGA   |
| Q9HBB8 | TLGALSTPFAFRIQGNQLFLNVT PDYEEKSLEAQLLCQSG     |
| Q9HBB8 | NAPEFPFKTKEIRVEEDTKVNSTVIPETQLQAEDRDKDDL      |
| Q9HBB8 | VSVNRPALRLDRPLDFYERPNMTFWLLVRDTPGENVEPSHT     |
| Q9HBB8 | EDGDRGINQPIIYSIFRGNVNGTFIIHPDSGNLTVARSVPS     |
| Q9HBB8 | IYSIFRGNVNGTFIIHPDSGNLTVARSVPS PMTFLLLVKGQ    |
| Q9HBB8 | IQAQDPEFSDLNSAITYRITNHSFRMEGEVVLTTTTLAQA      |
| Q9HBB8 | SGTTLRPPTSSTPGGPPGAENSTSHQPATPGGDTAQTPKPG     |
| P13688 | IGTQATPGPANSGRETIYPNASLLIQNV TQNDTG FYTLQV    |
| P13688 | PGPANSGRETIYPNASLLIQNV TQNDTG FYTLQV IKS DLVN |
| P13688 | NSGRETIYPNASLLIQNV TQNDTG FYTLQV IKS DLVNEEAT |
| P13688 | EEATGQFHVYPELPKPSISSNNSNPVEDKDAVAFTCEPETQ     |
| P13688 | AVAF TCEPETQD TTYLWWINNQLPVS PRLQLSNGNRTLTL   |
| P13688 | LWWINNQLPVS PRLQLSNGNRTLTL LSVTRNDTG PYECEI   |
| P13688 | SPRLQLSNGNRTLTL LSVTRNDTG PYECEIQNPVSANRSDP   |
| P13688 | SVTRNDTG PYECEIQNPVSANRSDP VTLNVTYGPDTP TISP  |
| P13688 | PYECEIQNPVSANRSDP VTLNVTYGPDTP TISPSDTYYRPG   |
| P13688 | TYGPDTP TISPSDTYYRPGANLSLSCYAASNPPAQY SWLIN   |

|        |                                               |
|--------|-----------------------------------------------|
| P13688 | NLSLSCYAASNPPAQYSWLINGTFQQSTQELFIPNITVNNNS    |
| P13688 | QYSWLINGTFQQSTQELFIPNITVNNNSGYTCHANN SVTGC    |
| P13688 | LINGTFQQSTQELFIPNITVNNNSGYTCHANN SVTGCNRTT    |
| P13688 | QELFIPNITVNNNSGYTCHANN SVTGCNRTTVKTIIVTELS    |
| P13688 | ITVNNNSGYTCHANN SVTGCNRTTVKTIIVTELSPVVAKPQ    |
| P13688 | VAKPQIKASKTTVTGDKDSVNLTCSTNDTGISIRWFFKNQS     |
| P13688 | KASKTTVTGDKDSVNLTCSTNDTGISIRWFFKNQSLPSSER     |
| P13688 | SVNLTCSTNDTGISIRWFFKNQSLPSSERMKLSQGNTTLSI     |
| P13688 | RWFFKNQSLPSSERMKLSQGNTTLSINPVKREDAGTYWCEV     |
| P13688 | PVKREDAGTYWCEVFNPISKNQSDPIMLVNPNALPQENGL      |
| P16573 | WYKVTTTGLNSEIARYIRSSNTSQTEPAYSGRVTIYSNGSL     |
| P16573 | RSSNTSQTEPAYSGRVTIYSNGSLFFQNVNKTDEGPYTL SV    |
| P16573 | PAYSGRVTIYSNGSLFFQNVNKTDEGPYTLVIDKQFNPIQ      |
| P16573 | QFNPIQTSVQFRVYPALQKPNVTGNNSNPMEGEPFVSLMCE     |
| P16573 | IQTSVQFRVYPALQKPNVTGNNSNPMEGEPFVSLMCEPYTN     |
| P16573 | NNSNPMEGEPFVSLMCEPYTNNTSYLWSRNGESLSEGDRVT     |
| P16573 | NSNPMEGEPFVSLMCEPYTNNTSYLWSRNGESLSEGDRVTF     |
| P16573 | LWSRNGESLSEGDRVTFSEGNRTLTLNVRRTDKGYECEA       |
| P16573 | NVRRTDKGYECEARNPATFNRSDFPNLDVIYGPDA PVISP     |
| P16573 | GPDA PVISPPDIYLHQGSNLNLSCHADSNPPAQYFWLINEK    |
| P16573 | QYFWLINEKLTSSQELFISNITTNNSGTACFVNNTVTGL       |
| P16573 | LINEKLTSSQELFISNITTNNSGTACFVNNTVTGLSRTT       |
| P16573 | QELFISNITTNNSGTACFVNNTVTGLSRTTVKNITVFE PV     |
| P16573 | GTYACFVNNTVTGLSRTTVKNITVFE PVTQPSIQITNTTVK    |
| P16573 | TTVKNITVFE PVTQPSIQITNTTVKELGSVTLTCSKDTGV     |
| P16573 | RWLFNSQSLQLTDRMTLSQDNSTLRIDPIKREDAGDYQCEI     |
| Q925P2 | WHKGSTTSTNAEIVRFVTGTNKTIKGPVHSGRETLYSNGSL     |
| Q925P2 | TGTNKTIKGPVHSGRETLYSNGSLLIQRVTMKDTGVYTIEM     |
| Q925P2 | NYRRRVLTGQFHVHTLLKSNITSNNSNPVEGDDSVSLTCD      |
| Q925P2 | RVLTGQFHVHTLLKSNITSNNSNPVEGDDSVSLTCD SYTD     |
| Q925P2 | NPVEGDDSVSLTCD SYTD PDNI TYLWSRNGESLSEGDR LKL |
| Q925P2 | LWSRNGESLSEGDR LKLSGNRTLTLNVTNRNDTGPYVCET     |
| Q925P2 | SLSEGDR LKLSGNRTLTLNVTNRNDTGPYVCETRNPVSVN     |
| Q925P2 | GDRLKLSGNRTLTLNVTNRNDTGPYVCETRNPVSVN RSDP     |
| Q925P2 | NVTRNDTGPYVCETRNPVSVN RSDPFSLNIYGPDTPIISP     |
| Q925P2 | GPDTPIISPDIYLHPGSNLNLSCHAASNPPAQYFWLINEK      |
| Q925P2 | QYFWLINEKPHASSQELFIPNITTNNSGTTCFVNNSVTGL      |
| Q925P2 | LINEKPHASSQELFIPNITTNNSGTTCFVNNSVTGLSRTT      |
| Q925P2 | QELFIPNITTNNSGTTCFVNNSVTGLSRTTVKNITVLEPV      |
| Q925P2 | GTYTCFVNNSVTGLSRTTVKNITVLEPVTQPSLQVTNTTVK     |
| Q925P2 | TTVKNITVLEPVTQPSLQVTNTTVKELDSVTLTCLSKDRQA     |

|        |                                                 |
|--------|-------------------------------------------------|
| Q925P2 | SVTLTCLSKDRQAHIHWFNNDTLLITEKMTTSQAGLILKI        |
| P31809 | VLLLVHNLPLALGAFAWYKGNNTAIDKEIARFV PNSNMNFT      |
| P31809 | KGNTTAIDKEIARFV PNSNMNFTGQAYS GREI IYSNGSLLF    |
| P31809 | PNSNMNFTGQAYS GREI IYSNGSLLFQMITMKDMGVYTLDM     |
| P31809 | NYRRTQATVRFHVHPILLKPNITSNNSNPVEGDSDSVSLTCD      |
| P31809 | TQATVRFHVHPILLKPNITSNNSNPVEGDSDSVSLTCD SYTD     |
| P31809 | LWSRNGESLSEGDRLK LSEG NR TLTL LNVTNRNDTGPYVCET  |
| P31809 | SLSEGDRLK LSEG NR TLTL LNVTNRNDTGPYVCETRNPVSVN  |
| P31809 | GDRLK LSEG NR TLTL LNVTNRNDTGPYVCETRNPVSVN RSDP |
| P31809 | NVTRNDTGPYVCETRNPVSVN RSDP FSLNIIYGPDTPIISP     |
| P31809 | GPDTPIISP SDIYLHPGSNLNLSCHAASNPPAQYFWLINEK      |
| P31809 | QYFWLINEKPHASSQELFIPNITTNNSGTYTCFVNNSVTGL       |
| P31809 | LINEKPHASSQELFIPNITTNNSGTYTCFVNNSVTGLSR TT      |
| P31809 | QELFIPNITTNNSGTYTCFVNNSVTGLSR TT VKNITVLEPV     |
| P31809 | GTYT CFVNNSVTGLSR TT VKNITVLEPV TQPFLQVTNTTVK   |
| P31809 | TTVKNITVLEPV TQPFLQVTNTTVKELDSVTLTCLSN DIGA     |
| P31809 | IQWLFNSQSLQLTERMTLSQNN SILRIDPIKREDAGEYQCE      |
| P31809 | QWLFNSQSLQLTERMTLSQNN SILRIDPIKREDAGEYQCEI      |
| P06731 | IGTQQATPGPAYSGREI IYPNASLLIQNI IQNDTGFYTLHV     |
| P06731 | YSGREI IYPNASLLIQNI IQNDTGFYTLHV IKS DLVNEEAT   |
| P06731 | EEATGQFRVYPELKP KPSISSNNSKPVEDKDAVAFTCEPETQ     |
| P06731 | AVAF TCEPETQDATY LWWVNNQSLPVS PRLQLSNGNR TLTL   |
| P06731 | LWWVNNQSLPVS PRLQLSNGNR TLTL FNVTRNDTASYKCET    |
| P06731 | SLPVS PRLQLSNGNR TLTL FNVTRNDTASYKCETQNPVSAR    |
| P06731 | SPRLQLSNGNR TLTL FNVTRNDTASYKCETQNPVSARRSDS     |
| P06731 | SDSVILNVLYGPDAPTISPLNTSYRSGENL NLSCHAASNPP      |
| P06731 | GPDAPTISPLNTSYRSGENL NLSCHAASNPPAQYSWFVNGT      |
| P06731 | NL NLSCHAASNPPAQYSWFVNGTFQQSTQELFIPNITVNNS      |
| P06731 | QYSWFVNGTFQQSTQELFIPNITVNNSG SYTCAHNSDTGL       |
| P06731 | FVNGTFQQSTQELFIPNITVNNSG SYTCAHNSDTGLNR TT      |
| P06731 | ITVNNSG SYTCAHNSDTGLNR TT VTTITVYAEPPKPFITS     |
| P06731 | RTTVTTITVYAEPPKPFITSNNSNPVEDEDAVALTCEPEIQ       |
| P06731 | NSNPVEDEDAVALTCEPEIQNTTYLWWVNNQSLPVS PRLQL      |
| P06731 | AVALTCEPEIQNTTYLWWVNNQSLPVS PRLQLSNDNR TLTL     |
| P06731 | LWWVNNQSLPVS PRLQLSNDNR TLTL SVTRNDVGPYECGI     |
| P06731 | LYGPD DPTISPSYTYRPGVNL SLSCHAASNPPAQYSWLID      |
| P06731 | QYSWLIDGNIQQHTQELFISNITEKNSGLYTCQANNSASGH       |
| P06731 | QELFISNITEKNSGLYTCQANNSASGHSRTTVK TITVSAEL      |
| P06731 | RTTVK TITVSAELPKPSISSNNSKPVEDKDAVAFTCEPEAQ      |
| P06731 | NSKPVEDKDAVAFTCEPEAQNTTYLWWVNGQSLPVS PRLQL      |
| P06731 | LWWVNGQSLPVS PRLQLSNGNR TLTL FNVTRNDARAYVCGI    |



|        |                                             |
|--------|---------------------------------------------|
| P06731 | SLPVSPRLQLSNGNRTLTLFNVTRNDARAYVCGIQNSVSAN   |
| P06731 | NVTRNDARAYVCGIQNSVSANRSDPVTLDVLYGPDTPIIISP  |
| P06731 | GPDTPIIISFPDSSYLSGANLNLSCHSASNPSPQYSWRINGI  |
| P06731 | NGIPQQHTQVLFIAKITPNNNGTYACFVSNLATGRNNSIVK   |
| P06731 | ITPNNNGTYACFVSNLATGRNNSIVKSI TVSASGTSPLGSA  |
| P40199 | IGTQQATPGPAYSGRETIYPNASLLIQNVTDQNTGFYTLQV   |
| P40199 | PGPAYSGRETIYPNASLLIQNVTDQNTGFYTLQVIKSDLVN   |
| P40199 | YSGRETIYPNASLLIQNVTDQNTGFYTLQVIKSDLVNEEAT   |
| P40199 | EEATGQFHVYPELKPKPSISSNNSNPVEDKDAVAFTCEPEVQ  |
| P40199 | NSNPVEDKDAVAFTCEPEVQNTTYLWVWNGQSLPVS PRLQL  |
| P40199 | LWVWNGQSLPVS PRLQLSNGNMTLLLSVKRNDAGSYECEI   |
| P40199 | SVKRNDAGSYECEIQNPASANRSDPVTLNVLVYGPDPGPTISP |
| P40199 | GPDGPTISPSKANYRPGENLNLSCHAASNPPAQYSWFINGT   |
| P40199 | NLNLSCHAASNPPAQYSWFINGTFQQSTQELFIPNITVNNNS  |
| P40199 | QYSWFINGTFQQSTQELFIPNITVNNNSGSYMCAHNSATGL   |
| P40199 | FINGTFQQSTQELFIPNITVNNNSGSYMCAHNSATGLNRTT   |
| P40199 | ITVNNNSGSYMCAHNSATGLNRTTVMITVSGSAPVLSAVA    |
| Q61400 | LLTYWSPATTAQVTVEAVPPNVTADNNVLLLVHNLQPQLRV   |
| Q61400 | WYKNGSGAGHNEIGRFVTSINRSKMGLAHSGRETIYSNGSL   |
| Q61400 | TASNKIILGPAHSDREIINYNGSLFFQGVTKNDEGAYALDM   |
| P31997 | ISNQQITPGPAYSNRETIYPNASLLMRNVTRNDTGSYTLQV   |
| P31997 | PGPAYSNRETIYPNASLLMRNVTRNDTGSYTLQVIKLNLM    |
| P31997 | YSNRETIYPNASLLMRNVTRNDTGSYTLQVIKLNLMSEEV    |
| P31997 | EEVTGQFSVHPETPKPSISSNNSNPVEDKDAVAFTCEPETQ   |
| P31997 | NSNPVEDKDAVAFTCEPETQNTTYLWVWNGQSLPVS PRLQL  |
| P31997 | LWVWNGQSLPVS PRLQLSNGNRTLTLLSVTRNDVGPYECEI  |
| P31997 | SVTRNDVGPYECEIQNPASANFSDPVTLNVLVYGPDAPTISP  |
| P31997 | GPDAPTISPSDTYYHAGVNLNLSCHAASNPPSQYSWSVNGT   |
| P31997 | NLNLSCHAASNPPSQYSWSVNGTFQQYTQKLFIPNITTKNS   |
| P31997 | QYSWSVNGTFQQYTQKLFIPNITTKNSGSYACHTTNSATGR   |
| P31997 | ITTKNSGSYACHTTNSATGRNRTTVRMITVSDALVQGSPPG   |
| Q9NZK5 | KGAALHLHDIGIVTMDWLVRNVYRPHCHICFTPRGIMQFR    |
| Q9NZK5 | RPSEKCSKWIILEDYRKRQNVTEFDDSLRNFTLVTDQHP     |
| Q9NZK5 | LEDYRKRQNVTEFDDSLRNFTLVTDQHPVIYTNQNVVWS     |
| Q9NZK5 | GETDWQGTSIDRNILDALMLNTRIGHGFALS KHPAVRTYS   |
| Q9XWD6 | TVKTI VDDYELKKVIHTVVYNDTEQCLNPLTGFCQCTVEKRG |
| Q9XWD6 | TGKHCDIGCSRGRFGLQCKQNCCTPGLEFSDSNASCDAKTG   |
| Q9XWD6 | RFGLQCKQNCCTPGLEFSDSNASCDAKTGQCCESGYKGP     |
| Q9XWD6 | ASECNPETGSCVCKPGRTGKNCSEPCPLDFYGPNAHQQC     |
| P34358 | DLMKKFAERFQS AKLKL SVKNESSEQLLTVLRNDLPMLNE  |
| P34358 | KNESSEQLLTVLRNDLPMLNETFCAINSYAAGVVFDEVDV    |

|        |                                             |
|--------|---------------------------------------------|
| P34358 | TVLMYGLGAVIFGAFVASFNNNTNSAIKAILVAWGAMIGIS   |
| P34358 | GAFALAVEAISDYMRRERELNLTNMFDNSSLHFSLGWALVM   |
| P34358 | VEAISDYMRRERELNLTNMFDNSSLHFSLGWALVMMIVDIL   |
| P34358 | TSADFSRLTDFEAPEDDENQTDGVTAQNTRINEQVRNRV     |
| P34358 | DMKRLLSDVKLDFKENEKAVNLSGGMKRKLCVCMALIGDSE   |
| P34358 | AGMDPGARQDVQKLVEREKANRTILLTTHYMDEAERLGDWV   |
| P34358 | DKVDKAIASRQNSRISHNSRNASEPSLKPAGYDTQSSTKSA   |
| P34358 | QVLIPIILLGLVGSLLTTLKSNNTDQFSVRSLTPSGIEPSKV  |
| P34358 | SVRSLTPSGIEPSKVVRWFENGTIPEEAANFEKILRKSGGF   |
| P34358 | ILRKSGGFVNLNYNTKNPLPNIKSLIGEMPPATIGMTMNS    |
| P34358 | NRGSLIAIGSSQELKSLYGNNYTMTLSLYEPNQDRMVVQLV   |
| P34358 | MVVQLVQTRLPNLKTSTNKTLNLKWQIPKEKEDCWSAK      |
| P08861 | EGPEQVIPINSGDLFVHPLWNRSCVACGNDIALIKLSRSAQ   |
| P30122 | QHMAIAWVKRNI EAFGGDPDNI TLFGESAGGASVSLQTLSP |
| P30122 | EEDFYKLVSGLTVTKGLRGANATYEVYTEPWAQDSSQETRK   |
| P19835 | QHMAIAWVKRNI AAFGGDPNNI TLFGESAGGASVSLQTLSP |
| P00450 | TFHSHGITYYKEHEGAIYPDNTTDFQRADDKVYPGEQYTYM   |
| P00450 | CQNLNHLKAGLQAFFQVQECNKSSKDNIRGKHVRHYIAA     |
| P00450 | AAEEIWNYPAGIDIFTKENLTAPGSDSAVFEQGTTRIG      |
| P00450 | NGRQKDVDFEYLFPTVFDENESLLEDNIRMFTTAPDQVD     |
| P00450 | EDWYSPQREWEKELHHLQEQNVSNAFLDKGEFYIGSKYKVV   |
| P00450 | KVFNPRRLEFALLEFLVFDENESWYLDNIIKTYSDHPEKVN   |
| Q61147 | TFHAHGVTYTYKEYEGAVYPDNTTDFQRADDKVLPGQQYVYV  |
| Q61147 | KEKEKNIDQEFVLMFVVNDENLSWYLEDNIIKTFCEPEKVD   |
| Q61147 | AAEEVIWNYPAGTDIFTGENLTALESDSRVFEQGATRIG     |
| Q61147 | DGRQKDVDFEYLFPTVFDENESLLEDNIRMFTTAPDQVD     |
| Q61147 | EDWYSPSRAWEKELHHLQEQNVSNVFLDKKEEFFIGSKYKVV  |
| Q61147 | KVFSPKKMEFFLLFLVFDENESWYLDNIIKTYSEHPEKVN    |
| Q9D6K9 | AETLGLLWGLWSEFWLPQNVSWADLEGPGDGYGYPRAQH     |
| P11597 | SIASSQVELVEAKSIDVSIQNVSVFKGTLKYGYTTAWWLG    |
| P11597 | DPVITASYLESHHKGHFIYKNVSEDLPLPTFSPTLLGDSRM   |
| P11597 | VTVHCLKMPKISCQNKGVVNSVMVKFLFPRPDQHSVAY      |
| P11597 | SKKKLFLSLDFQITPKTVSNLTESSESVQSFLQSMITAV     |
| Q7Z4R8 | EEVPEEWVLLHVQGGQIGAGNYSYLRNLNHEGKIVLRMRSLK  |
| P00751 | HCPRPDFENGEYWRSPYVNSDEISFHCDYGYTLRGSAN      |
| P00751 | NVSDEISFHCDYGYTLRGSANRTCQVNGRWSGQTAI CDGA   |
| P00751 | PSGSMNIYLVLDGSDSIGASNFTGAKKCLVNLIEKVASYGV   |
| P00751 | TYLVLDGSDSIGASNFTGAKKCLVNLIEKVASYGVKPRYGL   |
| P00751 | ALQAVYSMMSWPDVPPPEGWNRTRHVII LMTDGLHNMGGDP  |
| P04186 | RCPRPQDFENGEFWRSPFYNSDQISFQCYDGYVLRGSAN     |
| P04186 | NLSDQISFQCYDGYVLRGSANRTCQENGRWDGQTAI CDGA   |

|        |                                              |
|--------|----------------------------------------------|
| P04186 | PSGSMNIYLVLDGSDSIGSSNFTGAKRCLTNLIEKVASYGV    |
| P04186 | ALQAVYSMMSWAGDAPPEGWNRTRHVIIIMTDGLHNMGGNP    |
| P03953 | ILGGQEAAAARPYMASVQVNGTHVCGGTLLEQWVLSAAH      |
| P03953 | HPGSRPDSLEDDLILFKLSQNASLGPVHRPLPLQYEDKEVE    |
| P03953 | VVTHAGRPRDVLHQLRVSIMNRFTCNLRTYHDGVVTINMMC    |
| P32038 | ILGGQEAMAHARPYMASVQVNGTHVCGGTLVDEQWVLSAAH    |
| P08603 | FWSKEKPKCVEISCKSPDVINGSPISQKIIYKENERFYKC     |
| P08603 | CDIPVFMNARTKNDFTWFKLNDTLDYECHDGYESNTGSTTG    |
| P08603 | EHWQAQLSSPPYYGDSVEFNCSEFTMIGHRSITCIHGVW      |
| P08603 | RGKEGWIHTVCINGRWDPEVNCMAQIQLCPPPPQIPNSHN     |
| P08603 | NCSMAQIQLCPPPPQIPNSHNMTTLNRYRDGEKVSVLCQEN    |
| P08603 | PLCVEKIPCSQPPQIEHGTINSRSSHQESYAHGKLSYTCE     |
| P08603 | YAHGKLSYTCCEGGFRISEENETTCYMGKWSPPQCEGLPC     |
| P08603 | KAGEQVITYTCATYYKMDGASNVTCINSRWTGRPTCRDTSV    |
| P08603 | YQCRSPYEMFGDEEVMCLNGNWTPEPQCKDSTGKCGPPFPI    |
| P06909 | YDCKPRFLLKGFNKIQCVDGNWTTLPVCIIEEERTCGDIPPEL  |
| P06909 | AKCSVPPYHHGDSVEFICEENFTMIGHGSVSCISGKWTQLP    |
| P06909 | RVLKSTGIEAIKPKLTFETHNSTMDYKCRDKQEYERSICIN    |
| P06909 | RDKQEYERSICINGKWDPEPNTSKTSCPPPPQIPNTQVIE     |
| P06909 | KKSRYRTGEQVTFRCQSPYQMGSDTVTCVNSRWIGQPVCKD    |
| P06909 | RWIGQPVCKDNSCVDPHPVNATIIVTRTKNKYLHGDRVRYE    |
| P05156 | PWQRCIEGTCVCKLPHYQCCKNGTAVCATNRRSFPTYCQQKS   |
| P05156 | PTYCQQKSLECLHPGKFLNNGTCTAEGKFSVSLKHGNTDS     |
| P05156 | LGFQQGADTQRRFKLSDLSINSTECLHVHCRGLETSLAECT    |
| P05156 | CELPRSIPACVPWSPYLFQPNDTDIVSGWGREKDNERVFSL    |
| P05156 | REKDNERVFSLQWGEVKLISNCSKFGNRFYEKEMECAGTY     |
| P05156 | GSIDACKGDSGGPLVCM DANNVTVVWGVVSWGECGKPEFP    |
| Q61129 | PTYCHQKSFECLHPEIKFHSNGTCAAEGKFNVS LIYGRTKT   |
| Q61129 | CLHPEIKFHSNGTCAAEGKFNVS LIYGRTKTEGLVQVKLVD   |
| Q61129 | NVACVDLGFPLGVRDIQGSFNISGNLHINDTECLHVHCRGV    |
| Q61129 | FPLGVRDIQGSFNISGNLHINDTECLHVHCRGVETSLAECA    |
| Q61129 | NGVNDCGDSDELCKGCRGNASLCKSGVCIPDQYKCNDEV      |
| Q61129 | RGKDNQKVYSLRWGEVDLIGNCSQFYPDRIYKEMQCAGTR     |
| Q61129 | GSIDACKGDSGGPLVCEDINNVTVVWGVVSWGECGKPEFP     |
| P81475 | PPGSRHLHFQCFQGFNLRGAPNRTC GEGGRWSGVT PVCDDGS |
| P81475 | SDVAASFMASLSQSVERADSNS SHGPTEKLPRXIRVDGSAX   |
| P13569 | VAASLVVLWLLGNTPLQDKGNSTHSRNNSYAVIITSTSSYY    |
| P13569 | VLWLLGNTPLQDKGNSTHSRNNSYAVIITSTSSYYVFIYV     |
| P01233 | LSMGWTWASKEPLRPRCRPINATLAVEKEGCPVCI TVNTTI   |
| P01233 | RPINATLAVEKEGCPVCI TVNTTICAGYCPMTTRVLQGVLP   |
| P30922 | SCFPDAIDPFLCTHVIYSFANISNNEIDTWEWNDVTLYDTL    |

|        |                                             |
|--------|---------------------------------------------|
| Q7YS85 | SCFPDAIDPFLCTHVIYSFANISNNEIDTWEWNDVTLYDTL   |
| P36222 | SCFPDALDRFLCTHIIYSFANISNDHIDTWEWNDVTLYGML   |
| Q8SPQ0 | SCFPDAIDPFLCTHIIYSFANISNNEIDTWEWNDVTLYDTL   |
| Q29411 | SCFPDAIDPFLCTHIIYSFANISNNEIDTWEWNDVTLYDTL   |
| Q6TMG6 | SCFPDAIDPFLCTHVIYSFANISNNEIDTWEWNDVTLYDTL   |
| P12024 | TDLGIVHCKNVFPALPRMVNQSKVFLHMENTGLREIEPY     |
| P12024 | TDLGIVHCKNVFPALPRMVNQSKVFLHMENTGLREIEPY     |
| P12024 | PLKSLRTLDISHNVIWSLSGNETYEIKASTKLNLDNLHLEY   |
| P12024 | PLKSLRTLDISHNVIWSLSGNETYEIKASTKLNLDNLHLEY   |
| P12024 | LEYNHIEVLPNSFKYFDTVNRTFFDGNPIHTLREDAFKPA    |
| P12024 | LEYNHIEVLPNSFKYFDTVNRTFFDGNPIHTLREDAFKPA    |
| P12024 | EDAFKPARIREIYMRYCGLTNI SPVAFDSLVSLSLQILDLSG |
| P12024 | SPVAFDSLVSLSLQILDLSGNNLTKLHHKLFNNFDVLRVISM  |
| P12024 | LLKLDLSGDRNDPTNLQTLRNMTRMRNRSLSISRLGSSSV    |
| P12024 | LPNFNFYFDQVGTLSNLSNVVSHNQIRQLMYNSSWSGRNE    |
| P12024 | GTLNLSNVVSHNQIRQLMYNSSWSGRNEHGGMYHSNIKIL    |
| P12024 | GTLNLSNVVSHNQIRQLMYNSSWSGRNEHGGMYHSNIKIL    |
| P12024 | RNEHGGMYHSNIKILDLSHNNISI IHPGYFRPAEISLTHLH  |
| P12024 | YFRPAEISLTHLHLGYNSLMNTTRDVFGNMPLQLDLSYN     |
| P12024 | KVMDKSFMLENSLIKLGLENISLSTVPEIRLKYLREFRLG    |
| P12024 | LREFRLGYNELPSIQELAHNMSNLRMLDLSNNDLTNVPLM    |
| P12024 | QALPHLRRLMLSGNPITSLNNSFDGVNEDLEMLDISNFRL    |
| P12024 | TRIVKKGSGPTQEMQTLQGNPTDLQREMEGHLPSKLTNIT    |
| P12024 | LGNPTDLQREMEGHLPSKLTNITFSGPQFTNLNERILRGMR   |
| P12024 | NLNERILRGMRSPYLYMQLFNTSLQALPNPFKYMGRVRNI    |
| P12024 | FNTSLQALPNPFKYMGRVRNISLDIRYHNRNLKKIPNPNT    |
| Q13231 | FNGLKKNPKLKTLLAIGGWNGTQKFTDMVATANNRQTFV     |
| Q11174 | MPKEKIVGMPTYGRGWTLNNASAINPGTSGSPAKITQYVQ    |
| Q18143 | VHYCFVNPFPKTRLSPNLLQNI TTCTHLVYGSIPIDRDTGY  |
| Q18143 | GELPSNEELARVTHINPLFYNGSIPFEETIQGTVEELSKEG   |
| Q18143 | FLLGNDFHRKELAEGLVKAINSTNADGLEISWTSQPMVSDF   |
| Q18143 | IVVATSQSAYSDFYDYEHLNKTASLIVLHSHRLHSDSLPF    |
| Q18143 | GVGGLALHNMHQDDPSAVCDNRTAFPILNALSRAQVCQTCL   |
| Q18143 | TLTLGGNVNFNDVQEQEVVKNLTSLSKMKVCGMVLSLSCG    |
| Q18143 | MVLSLSCGDSEKYLNSILGDNMTFAIGNVMNIMEKYKFSGV   |
| Q18143 | NTFVKKLAQKFESGKASNCNRTL SARFSHYTQKPSTYYSV   |
| Q18143 | LSHIALRMTDKHSVDLPFFNHTKPEFPSTEKRVNIWKNVG    |
| Q18143 | GNRAVYEHDYETLTGMTKHENG TINMPMIEDFRYKIGYIQR  |
| P81908 | PLGRLRFKPKQSLTKWSNIWNATKYANSYQNTDQSFPGFL    |
| P81908 | TELSEDCLYLNVWI PAKPKNATVMIWIYGGGFQGTSSLP    |
| P81908 | ILQSGSSNAPWAVTSLYEARNRTL TLAKRMGCSRDNETEMI  |

|        |                                            |
|--------|--------------------------------------------|
| P81908 | LYEARNRTLTLAKRMGCSRDNETEMIKCLRDKDPQEILLNE  |
| P81908 | VNKDEGTAFLVYGAPGFSKDNNSI ITRKEFQEGLKIFFPRV |
| P81908 | GVMHGYEIEFVFGLEPLERRVNYTRAEELSRSIMKRWANFA  |
| P81908 | EILSRSIMKRWANFAKYGNPNTQNNSTRWPVFKSTEQKYL   |
| P81908 | SIMKRWANFAKYGNPNTQNNSTRWPVFKSTEQKYLTLNTE   |
| P06276 | KSHTEDDII IATKNGKVRGMNLTVFGGTVTAFLGIPYAQPP |
| P06276 | PLGRLRFKKQSLTKWSDIWNATKYANSCCQNI DQSFPGFH  |
| P06276 | TDLSEDCLYLNVWIPAPKPKNATVLIWIYGGGFQGTGSSLH  |
| P06276 | ILQSGSFNAPWAVTSLYEARNRTLNLAKLTGCSRENETEII  |
| P06276 | LYEARNRTLNLAKLTGCSRENETEIIKCLRNDKDPQEILLNE |
| P06276 | VNKDEGTAFLVYGAPGFSKDNNSI ITRKEFQEGLKIFFPGV |
| P06276 | GVMHGYEIEFVFGLEPLERRDNYTKAEELSRSSIVKRWANFA |
| P06276 | EILSRSIVKRWANFAKYGNPNETQNNSTSWPVFKSTEQKYL  |
| P06276 | RSIVKRWANFAKYGNPNETQNNSTSWPVFKSTEQKYLTLNT  |
| P06276 | SIVKRWANFAKYGNPNETQNNSTSWPVFKSTEQKYLTLNTE  |
| Q9Y4C5 | LYRCDLSVFLYSPAGSGGRNLTTLGIFGAATNKVVCSSPL   |
| Q9Y4C5 | RRVYDFVGLLVSPEMEQLNMTSGSGSSSKPFVVSARNAT    |
| Q9Y4C5 | ALNMTSGSGSSSKPFVVSARNATQAANAWRTALTFQQIKQV  |
| Q9NS84 | GAEARAAEEGGANQSPRFPSNLSGAVGEAVSREKQHIYVHA  |
| Q9NS84 | SVLRLYAPPGDPAARAPDTANLTTAALFRWRNKNVICSFPL  |
| Q9NS84 | RRLRLRFSGLRALAALDAFALNMTRGAAYGADRPFHLSARDA |
| Q5VTT2 | REAFPKGYDIEGPEKVKKLCNSTYRRLGTDESPIWTSETHE  |
| P35522 | VGQFFGAGLMPRETINSLFDNYTWTKTIDPRGLGNSAQWFI  |
| P47001 | TTATPTSSEKISSASKTSTNATSSSCATPSLKDSSCKNSG   |
| Q5QGZ9 | LKIEMKMNKLNISEELQRNISLQLMSNMNISNKIRNLST    |
| Q5QGZ9 | LQNISEELQRNISLQLMSNMNISNKIRNLSTTLQTIATKLC  |
| Q5QGZ9 | YFLSDDVQTWQESKMACAAQNASLLKINNKNALFEIKSQSR  |
| Q19970 | GLYAPEGQTHEWKWLNNGNEINKTLLWSSGEPYDHSMEGRER |
| Q19970 | WQKIENLFSFFGIGGSPTPHNATIPNDYEDEVKNETSATV   |
| Q19970 | GSPTPHNATIPNDYEDEVKNETSATVKSTVKFSDSEEETS   |
| Q6UVW9 | CSGDWLGVRDKCFYSDDRNWTASKIFCSLQKAELAQIDT    |
| Q6UVW9 | GTMHWHIGLSRKQGD SWKWTNGTTFNGWFEIIGNGSFAFLS |
| Q6UVW9 | GDSWKWTNGTTFNGWFEIIGNGSFAFLSADGVHSSRGFIDI  |
| Q9XVS3 | LGTTAFEDISFPARQPPAFVNQTEKCPDGWLRFADSCYWIE  |
| Q9UQC9 | NQNLISNIKEMITEASFYLFNATKRRVFRNIKILIPATWK   |
| Q9UQC9 | RGCGKEGKYIHFTPNFLNDNLTAGYGSRGRVVFHEWAHLR   |
| Q9UQC9 | CPQENCII SKLFKEGCTFIYNSTQNATASIMFMQSLSSVVE |
| Q9UQC9 | ENVKPHHQKNTVTVDNTVGNMTMFLVTWQASGPPEIILFD   |
| Q9UQC9 | IRMSKSLQNIQDDFNNAI LVNTSKRNPQQAGIREIFTFSPQ |
| Q14CN2 | MVTTASTYLFEATEKRFFFKNVSILIPENWKENPQYKRPKH  |
| Q14CN2 | KDRLNRMNQAAKHFLQTVENGSWVGMVHFDSTATIVNKLI   |

|        |                                            |
|--------|--------------------------------------------|
| Q14CN2 | SQKSLQLESKGLTLNSNAWMNDTVIIDSTVKGDTFFLITWN  |
| Q14CN2 | TWNSLPPSISLWDPSTIMENFTVDATSKMAYLSIPGTAKV   |
| Q14CN2 | NLQAKANPETLITITVTSRAANSSVPPITVNAKMNKDVNSFP |
| Q14CN2 | PSPMIVYAEILQGYVPVLGANVTAFILESQNGHTEVLELLDN |
| Q14CN2 | IRISASILDLRDSFDDALQVNTDLSPKKEANSKESFAFKPE  |
| Q14CN2 | TTDLSPKKEANSKESFAFKPENISEENATHIFIAIKSIDKSN |
| Q14CN2 | PKEANSKESFAFKPENISEENATHIFIAIKSIDKSNLTSKV  |
| Q14CN2 | NISEENATHIFIAIKSIDKSNLTSKVSNTAQVTLFIPQANP  |
| P51797 | FVASMVLGECRQMSSSSQIGNDSFQLQVTEDEVNSSIKTFFC |
| P51797 | MSSSSQIGNDSFQLQVTEDEVNSSIKTFFCPNDTYNDMATLF |
| P51797 | SFQLQVTEDEVNSSIKTFFCPNDTYNDMATLFFNPQESAILQ |
| Q9NY35 | YMAASIGTDFWYEURSPVQENSDDLKNSIWDEFISDEADEK  |
| Q9NY35 | DEFISDEADEKTYNDALFRYNGTVGLWRRRCITIPKNMHWYS |
| Q9CQX5 | YMAASIGTDFWYEURSPIQENSSDSNKIAWEDFLGDEADEK  |
| Q9CQX5 | EDFLGDEADEKTYNDVLFYRNGSLGLWRRRCITIPKNTHWYA |
| Q8R373 | LTDNEGNQKVVIITYSSRHVYNNLTEEQKGRVAFASNFLAGD |
| Q8R373 | TDNEGNQKVVIITYSSRHVYNNLTEEQKGRVAFASNFLAGDA |
| Q8R373 | EHLPPKSRIDYNNPGRVLLQNLTMASGLYQCTAGNEAGKE   |
| Q13286 | SYVVMLSAAHDILSHKRTSGNQSHVDPGPTPIPHNSSSRFD  |
| Q13286 | HKRTSGNQSHVDPGPTPIPHNSSSRFDCNSVSTAAVLLADI  |
| Q13286 | VVYFAEYFINQGLFELLFFWNTSLSHAQQYRWYQMLYQAGV  |
| Q96KA5 | IDLVLNVEDFDVESKFERTVNVSVPKKTRNNGTLAYYIFLH  |
| Q96KA5 | DVESKFERTVNVSVPKKTRNNGTLAYYIFLHHAGVLPWHDG  |
| Q96KA5 | YLPILFIDQLSNRVKDLMVINRSTELPLTVSYDKVSLGRL   |
| O96005 | DGARSAVVAAGGSSGQVTSNGSIGRDPPEAETQPQNPPAQP  |
| O96005 | KDTLMNLHVYI SEHEHFTDFNATSALFWEQHDLVYGDWTSG |
| O96005 | NSDGCYEHFAELDIPQSVQQNGSIYIHVYFTKSGFHPDFRQ  |
| O96005 | EMIKRAEDYGPVEVISHWHPNITINIIVDDHTPWVKGSVPPP |
| O96005 | YYPIIYFNDYWNLQKDYYPINESLASLPLRVSFCLSLWRW   |
| O96005 | VRSVFFGVFQSFVLLYILDNETNFVVQVSVFIGVLIDLWK   |
| P10909 | ERKTLLSNLEEAKKKEDALNETRESETKLKELPVCNETM    |
| P10909 | DALNETRESETKLKELPVCNETMMALWEECKPCLKQTCMK   |
| P10909 | YARVCRSGSLVGRQLEEFNLQSSPFYFWMNGDRIDSLEN    |
| P10909 | PTEFIREGDDRTVCREIRHNSGTCLRMKDQCDKCREILSV   |
| P10909 | RMKDQCDKCREILSVDCSTNNPSQAKLRRELDLQVAERL    |
| P10909 | AERLTRKYNELLSYQWKMLNTSSLLEQLNEQFNWVSRLAN   |
| P10909 | NTSSLLEQLNEQFNWVSRLANLTQGEDQYYLRVTTVASHTS  |
| Q06890 | DALEDTRDSEMKLKAFPEVCNETMMALWEECKPCLKHTCMK  |
| Q06890 | YARVCRSGSLVGRQLEEFNLQSSPFYFWMNGDRIDSLES    |
| Q06890 | DVDFLREGEDDRTVCKEIRRNSTGCLKMKGQCEKQCEILSV  |
| Q06890 | ILSVDCSTNNPAQANLRQELNDSLQVAERLTEQYKELQSF   |

|        |                                              |
|--------|----------------------------------------------|
| Q06890 | AERLTEQYKELLOSFSKMLNTSSLLEQLNDQFNWVSQLAN     |
| Q06890 | NTSSLLEQLNDQFNWVSQLANLTQGEDKYLRVSTVTTSS      |
| P23946 | FVLTAHCAGRSITVTLGAHNI TEEDTWQKLEVIKQFRHP     |
| P23946 | EEEDTWQKLEVIKQFRHPKYNTSTLHHDIMLLKKEKASLT     |
| Q96KN2 | LTEEEINTYKATHLDLEEYRNSRVEKFLFDTKEEILMHLW     |
| Q96KN2 | KTVIPGRVIGKFSIRLVPHMNVSAVEKQVTRHLEDVFSKRN    |
| Q3TWN3 | ALRVSETRVKLRVYQNNINNETWSRIAFTEHERRRHTPSE     |
| Q9BT09 | LHNLVHKGVKVVMDIPYELWNETSAEVADLKKQCDVLEEF     |
| O88507 | ADVTLPCGTASWDAAVTWRVNGTDLAPDLLNGSQLILRSLE    |
| O88507 | SWDAAVTWRVNGTDLAPDLLNGSQLILRSLELGHSGLYACF    |
| O88507 | PKGFYCSWHLPTPTYIPNTFNVTVLHGSKIMVCEKDPALKN    |
| O88507 | HLFSTIKYKVSISVSNALGHNTTITFDEFTIVKPPENV       |
| Q12860 | FVSQTGNLYIANVEASDKGNYSFVSSPSITKSVFSKFIIP     |
| Q12860 | KFPYADIVVQFKDVYALMGQNVTLFCFALGNPVPDIRWRKV    |
| Q12860 | KDKHQARIYVQAFPEWEHINDTEVDIGSDLYWPCVATGKP     |
| Q12860 | KPKAAPKPKFSWSKGTEWLVNSRILIWEDGSLEINNI TRN    |
| Q12860 | EVLNNSRILIWEDGSLEINNI TRNDGGIYTCFAENNRGKA    |
| Q12860 | ITRNDGGIYTCFAENNRKANSTGTLVITDPTRIILAPINA     |
| Q12860 | ITDPTRIILAPINADITVGENATMQCAASFDPALDLTFVWS    |
| Q12860 | RNAQLKHAGRYTCTAQTIVDNSASADLVVRGPPGPPGGLR     |
| Q12860 | SSVRSRSRYIITWDHVVALSNESTVTGYKVLVYRDPGQHDGK   |
| Q9P232 | KITLHCEARGNPSPHYRWQLNGSDIDMSMEHRYKLNNGNLV    |
| Q9P232 | FVSQETGHLIYISKVEPSDVGNITCVVTSMTNARVLGSPTP    |
| Q9P232 | GAALVLEERTQIENGALTI SNLSVTDSGMFQCI AENKHGLV  |
| Q9P232 | VSVQEHHERISLLNDGGLKIANVTKADAGTYTCMAENQFGKA   |
| Q9P232 | VTKADAGTYTCMAENQFGKANGTTHLVVTEPTRI TLAPSNM   |
| Q9P232 | VTTWIQTVVVTSPTDTPRYVFRNESIVPYSFYEYKVG VYNNKG |
| Q9P232 | VRYWNGGKKESSSKMKVAGNETSARLRGLKSNLAYTAVR      |
| Q9P232 | YTTAVRAYNSAGAGPFSATVNVVTKKTPPSQPPGNVWNAT     |
| Q9P232 | TVNVVTKKTPPSQPPGNVWNATDTKVLLNWEQVKAMENES     |
| Q9P232 | VWNATDTKVLLNWEQVKAMENESEVTGYKVFYRTSSQNNVQ    |
| Q9P232 | TGYKVFYRTSSQNNVQVLTNKTSAELVLPKEDIYIEVKA      |
| Q02246 | QVLLACRARASPPATYRWKMNGTEMKLEPGSRHQLVGGNLV    |
| Q02246 | PTDGRHFVSQTTGNLYIARTNASDLGNYSLATSHMDFSTK     |
| Q02246 | FVSQTTGNLYIARTNASDLGNYSLATSHMDFSTKSVFSKF     |
| Q02246 | QPRAAPKAVLWSKGTIELVNSRVVTPDGTILIRNISRS       |
| Q02246 | EILVNSRVVTPDGTILIRNISRSDEGKYTCFAENFMGKA      |
| Q02246 | ISRSDEGKYTCFAENFMGKANSTGILSVRDATKITLAPSSA    |
| Q02246 | VRDATKITLAPSSADINLGDNLTLQCHASHDPTMDLTFWT     |
| Q02246 | EEPRVAPTKVWAKGVSSSEMNVWEPVQDDMNGILLGYEIR     |
| Q02246 | YHVTVRAYNRAGTGPA SPANATTKMPPRRPPGNI SWTFS    |

|         |                                             |
|---------|---------------------------------------------|
| Q02246  | PASPSANATTMKPPRRPPGNI SWTFSSSSLSIKWDPVVPF   |
| Q02246  | SWTFSSSSLSIKWDPVVPFRNESAVTGYKMLYQNDLHLTP    |
| Q8I WV2 | KVKLNCEVKG NFKPHIRWKLNGTDVDTGMDFRYSVVEGSLL  |
| Q8I WV2 | DTGMDFRYSVVEGSLLINPNKTDAGTYQCTATNSFGTIV     |
| Q8I WV2 | FVSQETGNLYIAKVEKSDVGNVTCVVTNTVTNHKVLGPPTP   |
| Q8I WV2 | LKNGEPLLTRDRIQIEQGT LNITIVNLS DAGMYQCLAENKH |
| Q8I WV2 | PLLTRDRIQIEQGT LNITIVNLS DAGMYQCLAENKHGVIFS |
| Q8I WV2 | DILKENERITISEDGNLR IINVTKSDAGSYTCIATNHFGTA  |
| Q8I WV2 | PSRPSEKRRT EEALPEVT PANVSGGGGSKSELVITWETVPE |
| Q8I WV2 | KMIWMLTVLASADASRYVFRNESVHPFSPFEVKVGVFNKNG   |
| Q8I WV2 | VKYWRHEDKEENARKIRTVGNQTS TKITNLKGSVLYHLAVK  |
| Q8I WV2 | YHLAVKAYNSAGTGPSSATVNVTRKPPSPPGNI IWNS      |
| Q8I WV2 | TVNVTRKPPSPPGNI IWNSDSKII LNWDQVKALDNES     |
| Q8I WV2 | IWNSDSKII LNWDQVKALDNESVKGKYLVRWNRQSSTS     |
| Q8I WV2 | KGYKYLVRWNRQSSTS VIETNKTSVELSLPFDEDIYIEIKP  |
| Q69Z26  | KVKLSCEVKG NFKPHIRWKINGTDVDIGMDFRYSVVDGSLL  |
| Q69Z26  | DIGMDFRYSVVDGSLLINPNKTDAGTYQCIATNSFGTIV     |
| Q69Z26  | FVSQETGNLYIAKVEKSDVGNVTCVVTNTVTNHKVLGPPTP   |
| Q69Z26  | LKNGDPLLTRDRIQIEQGT LNITIVNLS DAGMYQCVAENKH |
| Q69Z26  | PLLTRDRIQIEQGT LNITIVNLS DAGMYQCVAENKHGVIFS |
| Q69Z26  | EILRENERITISEDGNLR IINVTKSDAGSYTCIATNHFGTA  |
| Q69Z26  | PSRPSEKRRT EEALPEVT PANVSGGGGSKSELVITWETVPE |
| Q69Z26  | KMIWMLTVLASADASRYVFRNESVRPFSPFEVKVGVFNKNG   |
| Q69Z26  | VKYWRHDDKEENAKIRTVGNQTS TKITNLKGSALYHLSVK   |
| Q69Z26  | YHLSVKAYNSAGTGPSSATVNVTRKPPSPPGNI IWNS      |
| Q69Z26  | TVNVTRKPPSPPGNI IWNSDSKII LNWDQVKALDNES     |
| Q69Z26  | IWNSDSKII LNWDQVKALDNESVKGKYLVRWNRQSSTS     |
| Q69Z26  | KGYKYLVRWNRQSSTS VIETNKTSVELSLPFDEDIYIEIKP  |
| P02457  | PADVAIQLTFLRLMSTEATQNVTYHCKNSVAYMDHDTGNLK   |
| P02452  | PADVAIQLTFLRLMSTEASQNI TYHCKNSVAYMQQTGNLK   |
| P11087  | LRVPNGETWKPEVCLICICHNGTAVCDDVQCNEELDCPNPQ   |
| P11087  | PADVAIQLTFLRLMSTEASQNI TYHCKNSVAYMQQTGNLK   |
| P02454  | LRVPNGETWKPDVCLICICHNGTAVCDGVLCKEDLDCPNPQ   |
| P02454  | PADVAIQLTFLRLMSTEASQNI TYHCKNSVAYMQQTGNLK   |
| P02459  | PNTANVQMTFLRLLSTEGSQNI TYHCKNSIAYLDEAAGNLK  |
| P02458  | PNTANVQMTFLRLLSTEGSQNI TYHCKNSIAYLDEAAGNLK  |
| P06681  | CLLFLYPGLADSAPSCPQNVNISGGTFTLSHG WAPGSLTY   |
| P06681  | PVSFENGIYTPRLGSYPVGGNVSFECEDGFTLRGSPVRQCR   |
| P06681  | FLIFKESASLMVDRIFSF EINVSVAIITFASEPKVLM SVLN |
| P06681  | SRDMTEVISSL ENANYKDHENGTGTNTYAALNSVYLM MNQ  |
| P06681  | QVFEHMLDVSKLTD TICGVGNMSANASDQERTPWHVTIKPK  |



|        |                                            |
|--------|--------------------------------------------|
| P06681 | HMLDVSKLTDITCGVGNMSANASDQERTPWHVTIKPKSQET  |
| P06681 | RDHENELLNKQSVPAHFVALNGSKLNINLKMGEVWTSCEAV  |
| P06681 | MGVEWTSCEAVVSQEKTMFPNLTVDREVVTDQFLCSGTQED  |
| P01024 | KKLVLSSEKTVLTPATNHMGNVFTIIPANREFKSEKGRNKF  |
| P01024 | HFISDGVKRSKLVVPEGIRMNKTVAVRTLDPERLGGREGVQK |
| P01024 | EEKKHYLMWGLSSDFWGEKPNLSYIIGKDTWVEHWPEEDEC  |
| P98093 | DQEVAKNKEIAVSVEIMTPENITIFREIVNPDKGKSGQFK   |
| P01027 | HFISDGVKKTLLKVVPEGMRINKTVAIHTLDPEKLGQGGVQK |
| P01027 | QKGGKYLWGLSSDLWGEKPNLSYIIGKDTWVEHWPEAEBC   |
| P02462 | GLPGIPGQDGPFGPPGIPGCNGTKGERGFLGPPGLPGFAGN  |
| P08572 | GIPGHPGQGGPRGRPGYDGCNGTQGDSDGPGPPGSEGFTGP  |
| P0C0L4 | DISEPGTWKISARFSDGLESNSSTQFEVKKYVLPNFVKIT   |
| P0C0L4 | SVRRFEQLELRPVLYNYLDKNLTVSVHVSPVEGLCLAGGGG  |
| P0C0L4 | ALDALSAYWIASHTTEERGLNVTLSSSTRNGFKSHALQLNN  |
| P0C0L4 | GGNSKGTLLKVLRTYNVLDKNTTCQDLQIEVTVKGHVEYTM  |
| P0C0L5 | DISEPGTWKISARFSDGLESNSSTQFEVKKYVLPNFVKIT   |
| P0C0L5 | SVRRFEQLELRPVLYNYLDKNLTVSVHVSPVEGLCLAGGGG  |
| P0C0L5 | ALDALSAYWIASHTTEERGLNVTLSSSTRNGFKSHALQLNN  |
| P0C0L5 | GGNSKGTLLKVLRTYNVLDKNTTCQDLQIEVTVKGHVEYTM  |
| P08649 | DISEPGTWKISARFSDGLESNRSTHFEVKKYVLPNFVKLT   |
| P08649 | VFQTAGLAFSDGDRLTQTKENLSCPKEKSRQKRNQVNFQKA  |
| P08649 | QPACREPFLLSCCKFAEDLRRNQTRSQAHLARAQDMLQEEDL |
| P08649 | TLDALSAYWIASHTTEEKALNVTLSSMGRNGYKSHLLQLNN  |
| P08649 | GGNSKGTLLKILRTYNVLDKNTTCQDLRIEVTVTGYVEYTR  |
| P01029 | DISEPGTWKISARFSDGLESNRSTHFEVKKYVLPNFVKIT   |
| P01029 | QQACREPFLLSCCKFAEDLRRNQTRSAHLARNNHMLQEED   |
| P01029 | TLDALSAYWIASHTTEEKALNVTLSSMGRNGLKTHGLHLNN  |
| P01029 | EGNSKGTLLKILRTYNVLDKNTTCQDLQIEVKVTGAVEYAW  |
| P25940 | PEGHFPENFSLITLRGQPANQSVLLSIYDERGARQLGLAL   |
| P25940 | ALGPALGLLGDFFRPLPQQVNLTDGRWHRVAVSIDGEMVTL  |
| P01031 | GPRCIKAFTECCVVASQLRANISHKDMQLGRLHMKTLLPV   |
| P01031 | SSSHLVTFVLPLEIGLHNINFSLETWFGKEILVKTLRVVP   |
| P01031 | QNQNSICNSLLWLVENYQLDNGSFKENSQYQPIKLQGTLPV  |
| P01031 | ELVKGRQYLIMGKEALQIKYNFSFRYIYPLDSLWIEYWPR   |
| P06684 | KRSITHDTDGVAVFVNLNPSNVTVLKFEIRTDPELPEENQ   |
| P06684 | SSSHLVTFVLPLEIGLHSINFSLETWFGKDIKLVKTLRVVP  |
| P06684 | QDENSIENSLWLVKQLENGSFKENSQYLPKIKLQGTLPV    |
| P06684 | NLVKGRQYLIMGKEVLIKHNFSFKYIYPLDSSWIEYWPT    |
| P12109 | TPDHLEPRLSIATDHTYRRNFTAADWQSRDAEEAISQTI    |
| P12109 | AGPPGDPLMGERGEDGPAGNGTEGFPGFPGYPGNRGAFIGI  |
| P12109 | GTEGFPGFPGYPGNRGAFIGINGTKGYPLKGDGEAGDPGD   |

|        |                                             |
|--------|---------------------------------------------|
| P12109 | PGLSLVKENYAELEDAFLKNVTAQICIDKKCPDYTCPITF    |
| P12109 | VQYSGTGQQRPERASLQFLQNYTALASAVDAMDINDATDV    |
| P12110 | KNLQGISSFRRGTFTDCALANMTEQIRQDRSKGTVHFAVVI   |
| P12110 | GEKGEFGADGRKGAPLAGKNGTDGQKGLGRIGPPGCKGD     |
| P12110 | RCGALDVVVIDSSESIGYTNFTLEKNFVINVVNRLGAIK     |
| P12110 | EKHESENLYSIACDKPQQVRNMTLFSDLVAEKFI DDMEVL   |
| P12110 | VALLQFGGPEQQVAFPLSHNLTAIHEALETQYLNFSHV      |
| P12110 | GGARRHAELS FVFLTDGVTGNDLHESAHSMRKQNVVPTVL   |
| P12111 | HTEFLNTYRTRKQEVLSHISNMSYIGGTNQTGKGLEIYMQS   |
| P12111 | YRTRKQEVLSHISNMSYIGGTNQTGKGLEIYMQSHLTKAAGS  |
| P12111 | EGALKEIASEPLNMHMFLENFTSLHDIVGNLVS CVHSSVS   |
| P12111 | TLKDITAQDSADII FLIDGSNNTGSVNFVILDFLVNLEK    |
| P12111 | GYRGPDEGGPGERGPPGVNGTQGFQGCQGRGVKGSRGF      |
| P12111 | GERGFPGYPGPKGNPGEPLNGTTGPKGIRRRGNSGPPGI     |
| P12111 | ITPLFLTRQEDRQLINALQINNTAVGHALVLPAGRDLTDFL   |
| P12111 | ASQHFARVAVVQHAPSESVDNASMPPVKVEFSLTDYGSKEK   |
| P12111 | GDQPTKNLVKFGHKQVNVNNTSSPTS NPVT TTKPVTTTK   |
| P12111 | PYFYDLTVTSAHDQSLVLKQNLTVTDRVIGLLAGQTYHVA    |
| A6NM27 | ATSQFHFNLRTVRDLMSFSQNMTHI IKDVIKYKEGAVDDIF  |
| A6NM27 | SVSALDIKENCMRVGLVAYSNETKVINLSMGINKSEVLQH    |
| A6NM27 | VGLVAYSNETKVINLSMGINKSEVLQHIQNLSPRTGKAYT    |
| A6NM27 | KVINLSMGINKSEVLQHIQNLSPRTGKAYTGAAIKKLKKE    |
| A6NM27 | RKNQGVQPQIAVLVTHRSEDNVTKAAVNLRREGVTI FTLGI  |
| A6NM27 | GKAIENIRQMGNTNTGAALNFTLSLLQAKKQRGNKV PCH    |
| A6NM27 | GVPQVLIVITDGESHADKLNATAKALRDKGILVLAVGIDG    |
| A6NM27 | FVETFGGLKGI FSDVTASVCNSKVDCEIDKVDLVFLMDGS   |
| A6NM27 | VKGPSLLNANLLDSLWDTFQNKSAARGKVLLFSDGLDDDV    |
| P13671 | QASHKKDSFIRIHKVMKVLNFTTKAKDLHLSDVFLKALNH    |
| P13671 | GSCQDGRQLEWGLERTRLSSNSTKKESCGYDTCYDWEKCSA   |
| Q02388 | EAVSGTARTTALEGP ELTIQNTTAHSLLVAWRSVPGATGYR  |
| Q02388 | SVVVRTAPEPVGRVSRQLILNASSDVLRI TWVGTGATAYR   |
| Q02388 | QAVQVGLLSYSHRPSPLFPLNGSHDLGI ILQRIRDMPYMDP  |
| P10643 | NVLSYTFQVKINNDFNIEFYNSTWSYVKHTSTEHTSSSRKR   |
| P10643 | SKRILPLTVCKMHVLHCQGRNYTLTGRDSC TLPASAEKACG  |
| P07357 | EDII SRVRGGSSGWSGGLAQNRSTITYRSWGRSLKYNPVVI  |
| P07358 | KKRYRYAYLLQPSQFHGEP CNFSDKEVEDCVNRP CRSQVR  |
| P07358 | TQGYEFILKEYESYDFERNVTEKMASKSGFSFGFKI PGI    |
| Q8BH35 | CLHFPGSRGGKPDFFETRAVNGSLVKS R PVRSVAEAPAPID |
| Q8BH35 | EYESYDFERLIVIEKKTHMFNFTSGFKVDGVM DLGIKVESN  |
| Q8VCG4 | QRTRKPIGSTSPISTIQAQVNFSAQKFAGTWLLVAVGSSCR   |
| Q8VCG4 | LYLEQGRKLSVKLYVRSLPVNDSVLDVFERRVREANLTEDQ   |

|        |                                               |
|--------|-----------------------------------------------|
| Q8VCG4 | RSLPVNDSVLDVFERRVREANLTEDQILFFPKYGFCEADQ      |
| P02748 | ETASSISLHGKGSFRFSYSKNETYQLFLSYSSKKEKMFHV      |
| P02748 | SVGAEFNKDDCVKRGEGRAVNI TSENLI DDVVSLIRGGTRK   |
| P06683 | REEQEQHYPIDICRMS PWSNWSECDPCLKQRFRSR SILAF    |
| P06683 | EVPEKGAGEVSPAHESSKPTNISAKFKFSYFMGNFRRLSS      |
| P06683 | SVTASVNADGCIKT DNGKTVNITRDNII DDVISFIRGGTRE   |
| Q99715 | PASSTSVVLSLKPETLYLVNVTA EYEDGFSIPLAGEETTE     |
| Q99715 | TLPIILTTQAPKSGPRNLQVYNATSN SLTVKWD PASGRVQKY  |
| Q99715 | AQYDSGLSVPLTDQGTTL YLVNVDLKYQIGWDTFCVKWSP     |
| Q99715 | CPLIYLDGYTSPGFKMLEAYNLTEKNFASVQGVLSLESGSFP    |
| Q99715 | SVKIYIDCYEII EKDIKEAGNITTDGYEILGKLLKGERKSA    |
| Q05707 | QLNLQNTATKAI IQGLMPDQNYTVQII IAYNKDKE SKPAQQQ |
| Q05707 | IKDLEKRKDPKPRVKVVD RGNRSRPSSEEVKFVCQTPAIA     |
| Q05707 | ITGPPTELITSEVTAR SFMVNWT HAPGNVEKYRVVYYPTRG   |
| Q05707 | VSETLVKVVVIDCKQVGEKAMNASANITSDGVEVLGKMVRSR    |
| Q05707 | LVKVVVIDCKQVGEKAMNASANITSDGVEVLGKMVRSRGGG     |
| P39059 | PFEDMELSGEPVPEGTLETTNMSI IQHSSPKQGSGEILNDT    |
| P39059 | TTNMSI IQHSSPKQGSGEILNDTLEGVHSDGDPITDSGSG     |
| P39059 | GVDGATGLPGMKGEKGARGPNSVGEKGD PGNRGLPGPPGK     |
| P39059 | GPPGPRGPPGHIKVLSNSLINITHGFMNFSDIPELVGPPGDLPLP |
| P39059 | PPGHIKVLSNSLINITHGFMNFSDIPELVGPPGDLPLP        |
| P39059 | LKGENGDGFKGEKGEKGDINGSFLMSGPPGLPGNPGPAGQ      |
| Q9UMD9 | PGQPGPQGGPGISKVFSAYS NVTADLMDFFQTYGAIQGGPPG   |
| P39061 | PGFPGTWVSHVAPSSGTGLSND SALAGNSLTSTSRCLPLP     |
| P39061 | VSHVAPSSGTGLSND SALAGNSLTSTSRCLPLPPTLTLCS     |
| P39061 | AAQVVVSLGVKLEVRDQQNISL LYTEPGASQTQTGASFR      |
| P39061 | GPPGPPGVFGLPGE PGRFGINGSYAPGAGLPGVPGKEGPP     |
| P39060 | PQGPLPVQPTADTTTHVT PRNGSTEPATAPGSPEPPSELLE    |
| P39060 | GVGAEILNVAKGIRSFVQLWNDTVPTESLARAETLVLETPV     |
| P39060 | VLETPVGPLALAGPSSSTPQENGTTLWPSRGIPSSPGAHTTE    |
| P39060 | GPPGPPGVFGLPGE PGRFGVNSSDVPGAGLPGVPGREGPP     |
| Q8K4Q8 | CALLTITVAILGYKVVEKMDNVTDGMETSHQTYDNKLTAVE     |
| Q8K4Q8 | LQANGDSLVDQRSQ LKETLQNNSF LITTVNKTLQAYNGYVT   |
| Q8K4Q8 | QANGDSLVDQRSQ LKETLQNNSF LITTVNKTLQAYNGYVTN   |
| Q8K4Q8 | DRQSQ LKETLQNNSF LITTVNKTLQAYNGYVTNLQDTSVL    |
| Q8K4Q8 | AKKTDWLKEKVQSLQTLAANNSALAKANNDTLEDMNSQLS      |
| 076368 | EGTPGKRGRRRRHGISLVAPNGTINEDLKKLLKTELMPLLI     |
| P06298 | SESIRKYVMTHFRWNKFGRRNSTGNDG SNTGYKREDISSYP    |
| P01189 | TENPRKYVMGHFRWDRFGRRNSSSSGSSGAGQKREDVSAGE     |
| P01190 | TENPRKYVMGHFRWDRFGRRNSSSSGSGVGGAAQKREEEVAV    |
| P06299 | SESIRKYVMTHFRWNKFGRRNNTGNDGSSGGYKREDISNYP     |

|        |                                             |
|--------|---------------------------------------------|
| P49747 | ACIQTESGARGPCPAGFTGNGSHCTDVNECNAHPCFPVR     |
| P02866 | IPSGSTGRLLGLFPDANVIRNSTTIDFNAAYNADTIVAVEL   |
| P23805 | RFTYPTGEILVYSNWADGEPNNSDEGQPENCVEIFPDGKWN   |
| Q9VN14 | GLDINDMERIPRGPYFVKQPNDTTFDVNKNRLINDVTLSCSCL |
| Q9VN14 | VFVSRDGALYFYSFIETVDRANYSCVQTLVSDTGRNGPFFP   |
| Q9VN14 | VAGDEIRLECMAGFYPIPSYNWTRQGLPLQRNAYTINYGRV   |
| Q9VN14 | GLPLQRNAYTINYGRVLI IQNATTNDNGEYSCTITNPRKTL  |
| Q9VN14 | QRNAYTINYGRVLI IQNATTNDNGEYSCTITNPRKTLMKSI  |
| Q9VN14 | IKDYNSDVTFICEAFAPDANYTWYKNAERLDPANINRDY     |
| Q9VN14 | MKPSFKKHPLESEVYAVYNGNTTIVCDPEAAPRPKFQWKD    |
| Q9VN14 | KNNHDGTGRI IVDWNRLTVHNTSMRDAGDYECVVKSAVNEI  |
| Q9VN14 | DGSHNGRAIRYYNILGRTNWNRWVNVSTHVQAREVDRYTS    |
| Q9VN14 | GRAIRYYNILGRTNWNRWVNVSTHVQAREVDRYTSRQQA     |
| Q9VN14 | IHSAEDMPQVAPQKPIALAYNSTCFNVTWQPIDMSRENI     |
| Q9VN14 | DMPQVAPQKPIALAYNSTCFNVTWQPIDMSRENI          |
| Q9VN14 | EPVEGYKVRIWESDQNMITANNTIPIGQKLESYINNLT      |
| Q8TAV3 | QLDGYRGRPFPLALLGWAPSNITFALLFGRRFDYRDPVFS    |
| P29602 | CTVGTCSNGQKLSINVVAANATVSMPPSSSPSSVMP        |
| Q17802 | LAFDEARVICDYVMNVPECTNGSGNDEGSADETTPESSGEM   |
| P41996 | MFCPAGLKFSESTVRCDYESNVSECQETSGEESGEASGEQS   |
| P41996 | LFSDGLCSATYHQCTAGQLINFTCAASNAVFAANTECVDS    |
| O16883 | PEESEAEIVGNLLESSGEKENVTEFATEKEEIDPSTLRVHD   |
| O16883 | MFETMTSGLNYMCVEQKLAFNATIKCIDDEAGVVQSECDTQ   |
| O16883 | SPLDVSVKTLDQLILDMYSNNKTEELNISEKNNVTSTFSEP   |
| O16883 | VKTLDQLILDMYSNNKTEELNISEKNNVTSTFSEPSEKEDE   |
| O16883 | LILDMYSNNKTEELNISEKNNVTSTFSEPSEKEDEASTTVI   |
| O16883 | SEKEDEASTTVISVISPLHTNATDSEILEHISEKSTEESG    |
| O16883 | GEGSGEYDASGSSGDNSEFNSGSSGEASEEGESSGSEDQ     |
| O16883 | GEGSAEYDASGSSGDNSEFNSGSSGEASGVGESSGSEDQ     |
| O16883 | NYKKIEVIESSGDYEFSGSSNESIEQSKEGSAASIYEILQA   |
| P82474 | NNGGINSEETYPYRQDGCNSTVNAPVVSIDSYENVPSHN     |
| P82474 | MDAAGRDFQLYRSGIFTGSCNISANHALTVVGYGTENDKDF   |
| Q21771 | LSNIVLANSQMVLD SARLSLNETETETGTSA PATCVSSAVC |
| Q21771 | NGACNSITATCDCFAAYTKNNLTALAEALTSFCNVETCNGAE  |
| P22792 | IIFVETSFTTLETRAFGSPNLT KVFLNTQLCQFRPDAFG    |
| P22792 | DAFGGLPRLEDLEVTGSSFLNLSTNIFSNLTS LGKLT LNFN |
| P22792 | LEDLEVTGSSFLNLSTNIFSNLTS LGKLT LNFNMLEALPEG |
| P22792 | LPQGVFGKLGSLQELFLDSNNISELPPQVFSQLFCLERLWL   |
| P22792 | IWLQRNATHLPLSIFASLGNTFLSLQWNMLRVLPAGLFA     |
| P22792 | LPAGIFRDLEELVKLYLGSNNLTALHPALFQNL SKLELLSL  |
| P22792 | LVKLYLGSNNLTALHPALFQNL SKLELLSLSKNQLTTLPEG  |

|        |                                               |
|--------|-----------------------------------------------|
| P22792 | QCRWLVNQLSPQQGSLGLQYNASQEWDLRSSCGSLRLTVSI     |
| Q9DBB9 | IVFVETAFTTVTRAFSGSNLTKVVFLNTQVRHLEPDAFG       |
| Q9DBB9 | DAFGGLPRLQDLEITGSPVSNLSAHI FSNLSSLEKLTLDLFD   |
| Q9DBB9 | LQDLEITGSPVSNLSAHI FSNLSSLEKLTLDLFDRLAGLPED   |
| Q9DBB9 | LWLQHNAICHLPVSLFSSLHNLTFLSLKDNLARTLPEGLFA     |
| Q9DBB9 | LLHLSLSYNQLETI PEGAFNTLSRLVSLTSLSHNAITDLPEH   |
| Q9DBB9 | LPEHVFRNLEQLVKLSLDSNNLTALHPALFHNLSRLQLLNL     |
| Q9DBB9 | LVKLSLDSNNLTALHPALFHNLSRLQLLNL SRNQLTTLPGG    |
| Q9DBB9 | NNLTALHPALFHNLSRLQLLNL SRNQLTTLPGGI FDTNYDL   |
| Q9DBB9 | RWLN IQLSSRDGSDSAAVMVYNSQEWGLRSSCGLLRVTVSI    |
| Q8IYJ1 | YFFEKQNLRFVYNVDSKTNISKPKDFLGQAFLALGEVIG       |
| P43510 | GGDPLAAWRYWVKDGI V TGSNYTANNGCKPYFPPEEHHSK    |
| P43510 | AAWRYWVKDGI V TGSNYTANNGCKPYFPPEEHHSK KTHFD   |
| P34946 | VNNGWIDSTIQEKAYIDFSYNNSYQQIIDSSTRDSL DAYN     |
| Q9H3G5 | SLVGPPFGLNMKSYAGFLT V NKTYNSNLFFWFFPAQIQPED   |
| Q9H3G5 | PGGSSMFGLFVEHGPYVVTSNMTLRDRDFPWTTL SMLYID     |
| Q9H3G5 | FEILDKLLDGLTSDPSYFQNV TGC SNY N FL RCTE PEDQL |
| Q9H3G5 | QLYYVKFLSLPEVRQAIHVGNQTFNDGTIVEKYLR EDTVQS    |
| P20023 | KIRGSTPYRHGDSVTFACKTNFSMNGNKS VWCQANMMWGPT    |
| P20023 | PYRHGDSVTFACKTNFSMNGNKS VWCQANMMWGPTRLPTCV    |
| P20023 | IFCPSPPPILNGRHIGNSLANVSYGSIVTYTCDDPEEGVN      |
| P20023 | PHPQILRGRMVSGQKDRYTYNDTVIFACMFGFTLKGSKQIR     |
| P20023 | EATGRQLLTKPQHQFVRPDVNS SCGEGYKLSGSVYQECQGT    |
| P20023 | SHVHIANGYKISGKEAPYFYNDTVTFKCYSGFTLKGSSQIR     |
| P20023 | CQHVRQSLQELPAGSRVELVNTSCQDGYQLTGHA YQMCQDA    |
| P20023 | LRSPPVTRCPNPEVKHGYKLNKTHSAYSHNDIVYVDCNPGF     |
| P20023 | HSAYSHNDIVYVDCNPGFIMNGSRVIRCHTDNTWVPGVFTC     |
| P20023 | PTCIKKAFIGCPPPKTPNGNHTGGNIARFSPGMSILYSCD      |
| P20023 | LLC THEGTWSQPAPHCKEVNCS PADMDGIQKGLEPRKMY     |
| Q68CJ9 | TTREESPGSPGADWGFQDTANLTNSTEELDNATLVLRNATE     |
| Q68CJ9 | EESPGSPGADWGFQDTANLTNSTEELDNATLVLRNATEGLG     |
| Q68CJ9 | GADWGFQDTANLTNSTEELDNATLVLRNATEGLGQVALLDW     |
| Q68CJ9 | DTANLTNSTEELDNATLVLRNATEGLGQVALLDWVAPGPST     |
| WI921  | IIEVPDDIQQCDILIQRAHNCTS QRTGCSRRVEESYDRRF     |
| P02522 | QGHSELNGPCPNLKETGVEKAGSVLVQAGPVGVEQANCK       |
| P02522 | KAGSVLVQAGPVGVEQANCKGEQFVFEKGEYPRWDSWTSS      |
| P02522 | AGPVGVEQANCKGEQFVFEKGEYPRWDSWTSSRRTDSLSS      |
| P02522 | RWDSWTSSRRTDSLSSLRPIKVDSQEHKITLYENPNFTGKK     |
| P02522 | SRRTDSLSSLRPIKVDSQEHKITLYENPNFTGKKMEVIDDD     |
| P02522 | IKVDSQEHKITLYENPNFTGKKMEVIDDDVPSFHAHGYQEK     |
| P02522 | KVDSQEHKITLYENPNFTGKKMEVIDDDVPSFHAHGYQEKV     |

|        |                                            |
|--------|--------------------------------------------|
| P02522 | KKMEVIDDDVPSFHAHGYQEKVSSVRVQSGTWVGYQYPGYR  |
| P02522 | SGTWVGYQYPGYRGLQYLLEKGDYKDSGDFGAPQPQVQSVR  |
| P02522 | VGYQYPGYRGLQYLLEKGDYKDSGDFGAPQPQVQSVRRIRD  |
| P10040 | LIYLATDVASVAVPTKEAYFNGSTYLRLTTPMPIWDHSAIS  |
| P10040 | FKYEYGNLYLHVDRRAASIFANSTYNSQFLTNQDIGYKDAIL |
| P10040 | LILGNSFSGCLLDGPGQLQFVNNSTVQNVVFGHCPLTPGPCS |
| P10040 | ILGNSFSGCLLDGPGQLQFVNNSTVQNVVFGHCPLTPGPCSD |
| P10040 | ENGGSCLENSRGDYQCFCDPNHSQHCETEVIHPLCQTNP    |
| P10040 | YAGARCEVDTDECASQPCQNNNGSCIDRINGFSCDCSGTYT  |
| P10040 | NCQTSTGDGASALALTPINCNATNGKCLNGGTCSMNGTHCY  |
| P10040 | TPINCNATNGKCLNGGTCSMNGTHCYCAVGYSGDRCEKAEN  |
| P10040 | GYEGENCEVDIDECSNPNCSNGSTCIDRINNFTCNCPGMT   |
| P10040 | IDECGSNPNCSNGSTCIDRINNFTCNCPGMTGRICDIDIDD  |
| P10040 | DINECESNPCQYNGNCLERSNITLYQMSRITDLPKVFSQPF  |
| P10040 | YQMSRITDLPKVFSQPFSEFENASGYECVCPGIIIGKNCEIN |
| P10040 | TCYDQIDDDYDCDCDANYGGKNCVLLKGCQNPCLNGGACL   |
| P10040 | PCLNGGACLPLYLINEVTHLYNCTCENGFGQDKCEKTTLSM  |
| P10040 | LNLHSSLLNKWEGVFIGSKLNDNSNWHKVFVAINTSHLVLSA |
| P10040 | GVFIGSKLNDNSNWHKVFVAINTSHLVLSANDEQAIFPVGSY |
| P10040 | LVLSANDEQAIFPVGSYETANNSQPSFPRTYLGGTIPNLKS  |
| P10040 | GCMQDIMVNGKWIIFPDEQDANISYTKLENVQSGCPRTEQCK |
| P10040 | LWHTFACHCPRFFGHGTCQHNMTAATFGHENTHSAVIVET   |
| P10040 | RFFFGHGTCQHNMTAATFGHENTHSAVIVETDVARRAIRS   |
| P10040 | YTVGGQKLDNGYNHLIEVVRNQTIVQVKLNGTEYFRKTLST  |
| P10040 | NGYNHLIEVVRNQTIVQVKLNGTEYFRKTLSTTGLLDAQVL  |
| P10040 | KEADDSRDYFKGI IQDVKVSNGSLNLIVEMYSLNVTDVQVN |
| P10040 | IQDVKVSNGSLNLIVEMYSLNVTDVQVNAKPLGAVTIDRAS  |
| P10040 | VTCPGQSLCQNLDDGYECVTNTTFTGQERSPLAFFYFQEQQ  |
| P10040 | ARVGDLLPYFSMAELYSRTNVSVQQAQFRLNATRPEEGC    |
| P10040 | MAELYSRTNVSVQQAQFRLNATRPEEGCILCFQSDCKNDG   |
| P10040 | FEGDDCGTDIDECLNTECLNNGTCINQVAFFCQCPGFEG    |
| P10040 | GQHCEQNIDECADQPCHNGNCTDLIASVDCPEDYMGPO     |
| P10040 | YMGPQCDVLKQMTCENEPCRNGSTCQNGFNASTGNNFTCTC  |
| P10040 | KQMTCENEPCRNGSTCQNGFNASTGNNFTCTCVPGFEGPLC  |
| P10040 | NEPCRNGSTCQNGFNASTGNNFTCTCVPGFEGPLCDIPFCE  |
| P10040 | FNKPGSFQCICQKPYCGAYCNFTDPCNATDLCNNGRCVES   |
| P10040 | FQCICQKPYCGAYCNFTDPCNATDLCNNGRCVESCAGKPD   |
| P10040 | ESCGAKPDYCECPEGFAGKNCTAPITAKEDGPSITDIAII   |
| Q6WN34 | KCVEPHTPSGLRAPPKSCQHNGTMYQHGEIFSAHELFP SRL |
| Q8BGC9 | EKIQGLPFGSCLAISDGPVHNSTGIPFFYMTAKDPAVADLV  |
| O75629 | FDPQSPLCVHIMLSGTVTKVNETEMDIAKHS LFIRHP EMT |

|        |                                             |
|--------|---------------------------------------------|
| 075629 | IRHPEMKTWPSSHNWFFAKLNIITNIWVLDYFGGPKIVTPEE  |
| P35353 | LNPVSTSLQDQRCENLSLTSNVSLQCNASVDLIGTCWPRS    |
| P35353 | LQDQRCENLSLTSNVSLQCNASVDLIGTCWPRS PAGQLVV   |
| P35353 | SPAGQLVVRPCPAFFYGVRYNTTNGYRECLANGSWAARVN    |
| P35353 | AFFYGVRYNTTNGYRECLANGSWAARVNYSECQEILNEEK    |
| P35353 | NTTNGYRECLANGSWAARVNYSECQEILNEEKKSKVHYHV    |
| P47866 | ELLLDGGWGEPPDPEGPYSCNTTLDQIGTCWFPQSAPGALVE  |
| P47866 | SAPGALVERPCPEYFNIGI KYNTRNAYRECLENGTWASRVN  |
| P47866 | EYFNIGI KYNTRNAYRECLENGTWASRVNYSHCEPILDDKQ  |
| P47866 | NTRNAYRECLENGTWASRVNYSHCEPILDDKQ RKYDLHYR   |
| Q8CII9 | CHDLETVEVTWGS GPDHGANLSLEFRYGTGALQPCPRYFL   |
| Q8CII9 | AMVFKARQRASAWLKPRPPWNVTLWTDPGDVTVSWPAHSY    |
| P06205 | TWSSWEGEATIAVDGFHCKGNATGIAVGRTLSQGGVLVLGQ   |
| P06206 | TWSSWEGEATIGVDGFHCKGNATGIAMGVTLSQGGVLVLGQ   |
| P06207 | TWSSWEGEATIAVDGFHCKGNATGIAVGRTLSQGGVLVLGQ   |
| P48199 | WLDGKPRVRKSLQKGYIVGTNASIILGQEQDSYGGGF DANQ  |
| Q27367 | DAYESWLEAPIPIYLSFYMFNWTN PEDIRNPD IKPNFVEMG |
| Q27367 | IKPNFVEMGPYTFLEKHKKENYTFYDNATVAYYERRTWFFD   |
| Q27367 | EMGPYTFLEKHKKENYTFYDNATVAYYERRTWFFD PERSNG  |
| Q27367 | DNATVAYYERRTWFFD PERSNGT LDDMVTAHAITATVADE  |
| Q27367 | GGKLYVTKPVGEWIFEGYQDNITDFLNLFNNTKIDIPYKRF   |
| Q27367 | VGEWIFEGYQDNITDFLNLFNNTKIDIPYKRF GWLADRNES  |
| Q27367 | LFNNTKIDIPYKRF GWLADRNESLTYDGLFTIHTGTDDISN  |
| Q27367 | LTHWNGKSETGFYEMPCGIVNGTTGDMFPPKMNVNDEITIF   |
| Q9BUF7 | FLLARWGRAWGQIQTTSANENSTVLPSSSTSSSDGNLRPEA   |
| P02470 | DSGISEVRS DRDKFVIFLDVKHFS PEDLTVKQEDFVEIHG  |
| P07333 | PSVPELVVKPGATVTLRCVNGSVEWDGPPSPHWTLYSDGS    |
| P07333 | PPSPHWTLYSDGSSSILSTNNATFQNTGT YRCTEPGDPLGG  |
| P07333 | VLEAGVSLVRVRGRPLMRHTNYSFSPWHGFTIHRAKFIQSQ   |
| P07333 | AQIVCSASSVDVNFDFLQHNNTKLAIPQQSDFHNNRYQKV    |
| P07333 | NRYQKVLTLNLDQVDFQHAGNYSVASNVQGHSTSMFFRV     |
| P07333 | NVQGHSTSMFFRVESAYLNLSSQNLIQEVTVGEGNLNK      |
| P07333 | VGEGNLNKVMVEAYPGLQGFWNTYLGPFSDHQPEPKLANAT   |
| P07333 | GFNWTYLGPFSDHQPEPKLANATTKD TYRHTFTLSL PRLKP |
| P07333 | LT FELTLRYPPEVSVIWT FINGSGTLLCAASGYQP NVTWL |
| P07333 | WTFINGSGTLLCAASGYQP NVTWLQCSGHTDRCDEAQVLQ   |
| P07333 | QEPFHKVTVQSLLT VETLEHNQTYECRAHNSVSGSWAFIP   |
| P09581 | PSGPELVVEPGETVTLRCVNGSVEWDGPI SPYWTLDPESP   |
| P09581 | PISPYWTLDPESPGSTLTRNATFKNTGT YRCTELEDPMAG   |
| P09581 | NDVGTRTATMNFQVVESAYLNLTS EQSLLEQEVSVGDSLILT |
| P09581 | VGDSLILTVHADAYPSIQHYNWTYLGPF FEDQRKLEFITQR  |

|        |                                              |
|--------|----------------------------------------------|
| P09581 | VKASEAGQYFLMAQNKAGWNNLTFELTLRYPPEVSVTWMPV    |
| P09581 | LT FELTLRYPPEVSVTWMPVNGSDVLFCDVSGYPQPSVTWM   |
| P09581 | WMECRGHTDRCDEAQLQVWNDTHPEVLSQKFFDKVIIQSQ     |
| P09581 | QKPFDKVIIQSQLPIGTLKHNMTYFCKTHNSVGNSSQYFRA    |
| P09581 | PIGTLKHNMTYFCKTHNSVGNSSQYFRAVSLGQSKQLPDES    |
| P09603 | CVRTFYETPLQLLEKVKNVFNETKNLLDKDWNIFSKNCNNS    |
| P09603 | VFNETKNLLDKDWNIFSKNCNNSFAECSSQDVVTKPDCNCL    |
| P15509 | DLRTVAPASSLNVRFDSRTMNLSDWCQENTTF SKCFLT DKK  |
| P15509 | SSLNVRFDSRTMNLSDWCQENTTF SKCFLT DKKNRVVEPRL  |
| P15509 | CSCTFREICLHEGVTFEVHVNTSQRGFQKLLYPNSGREGT     |
| P15509 | RGFQKLLYPNSGREGTAAQNFSCFIYNADLMNCTWARGPT     |
| P15509 | GREGTAAQNFSCFIYNADLMNCTWARGPTAPRDVQYFLYIR    |
| P15509 | EIRCPYYIQDSGTHVGCHELDNLSGLTSRNYFLVNGTSREIG   |
| P15509 | HVGCHELDNLSGLTSRNYFLVNGTSREIGIQFFDSLDDTKKI   |
| P15509 | IQFFDSLDDTKKIERFNPPSNVTVRCNTHCLVRWKQPRTY     |
| P15509 | LLDDTKKIERFNPPSNVTVRCNTHCLVRWKQPRTYQKLSYL    |
| P15509 | QYQLDVHRKNTQPGTENLLINVSGDLENRYNFPSEPRAKH     |
| P15509 | SSEPRAKHSVKIRAADVRIILNWSSWSEAEIEFGSDDGNLGSV  |
| P04141 | SPSTQPWEHVNAIQEARLLNLSRDTAAEMNETVEVISEMF     |
| P04141 | NAIQEARLLNLSRDTAAEMNETVEVISEMFDLQEPTCLQT     |
| P01587 | FKKLTVCVQTRLKIFEQGLRGNFTKLKALNMTASYYQTYCP    |
| P01587 | RLKIFEQGLRGNFTKLKALNMTASYYQTYCPPTPETDCET     |
| Q99062 | VSAPIVHLGDPITASCIIKQNCSHLDPEPQILWRLGAELOP    |
| Q99062 | GRQQRLSDGTQESIITLPHLNHTQAFLLSCLNWNLSLQILD    |
| Q99062 | SLQILDQVELRAGYPPAI PHNLSCLMNLTTSSLICQWEPGP   |
| Q99062 | QVELRAGYPPAI PHNLSCLMNLTTSSLICQWEPGPETHLPT   |
| Q99062 | QGYVSWRPSGQAGAILPLCNTTELSCTFHLPSEAQVEALV     |
| Q99062 | PWPQGYVIEWGLGPPSASNSKTRMEQNGRATGFLLKENI      |
| Q99062 | LTHYTI FWTNAQNQSFSAILNASSRGFVLHGLEPASLYHIH   |
| Q99062 | LEPASLYHIHMAASQAGATNSTVLTLMTLTPEGSELHII      |
| P40223 | ISPPVRLGDPVLASCTISPNC SKLDQQA KILWRLQDEPIQ   |
| P40223 | DRQHHL PDGTQESLITLPHLNYTQAF LFC LVPWEDSVQLLD |
| P40223 | SVQLLDQAE LHAGYPPASPSNLSCLMHLTTNSLVCQWEPGP   |
| P40223 | ADCQYQD TI PDCVAKKRQNNCSI PRKNLLLYQYMAI WVQA |
| P40223 | PSEYMEQECELRYQPQLKANWTLVFHLPSSKDQFELCGLH     |
| P40223 | QGYLLSWSSPDHQGD IHLCNTTQLSCIFLLPSEAQNVTLV    |
| P40223 | IHLCNTTQLSCIFLLPSEAQNVTLVAYNKAGTSSPTTVVFL    |
| P40223 | APSLPQGYLIEWEMSSPSYNN SYKSWMI EPNGNITGILLK   |
| P40223 | EMSSPSYNN SYKSWMI EPNGNITGILLKDNINPFQLYRITV  |
| P40223 | LTHYTI FWADAGHSFSVTLNISLHDFVLKHLEPASLYHVY    |
| P40223 | LEPASLYHVYLMATSRAGSTNSTGLTLR TLDP SDLNIFLGI  |



|        |                                              |
|--------|----------------------------------------------|
| B0R8E4 | LMVGSVIGAGVAFTGGAAAANASDLNDYQRFNENTNYTYST    |
| B0R8E4 | VDTGLVVDNDSTTEIVDDYENTSISDVDYAYAIVEIDDGNG    |
| B0R8E4 | YFASDTEADPDYVNSNEELTNGSALDGVSTDDDTDFDVTQG    |
| B0R8E4 | GDITLDNPTGAYVVGSEVDINGTANEGTDDVLYARDNNDNF    |
| B0R8E4 | DILGLPGTYRLGIIAKSDAVNSSGGVKDNI DTSDFNQGVSS   |
| B0R8E4 | DGKFGEDTANSISDLEDEVGNYS GSPTGDQIRDRILSNTV    |
| B0R8E4 | KADDNTITVELLQGDASIEINSTDEWNSDQQWSVDVPLSNV    |
| B0R8E4 | EWNSDQWSVDVPLSNVEFGNYTVEADDGDNTDRQNVEIVE     |
| B0R8E4 | VEIVEELEEPDQTTVDQ PENNQMTMTTMTETTETTTTMTT    |
| B0R8E4 | TTTMTETTETTETTTTQENTTENGSEGTSDGESGGSI PG     |
| B0R8E4 | TETTETTETTTTQENTTENGSEGTSDGESGGSI PGFGVG     |
| Q5V7F4 | ITVEGTEDLTFGDASETVTVNI TS DQASLNLNDENVVQGE   |
| Q5V7F4 | GEITLDSPSGAYITGSQIDVNGTANQGV DQVALYARDNNDY   |
| Q5V7F4 | SDFNSGVSGATALRVTD TALNGTFTTYNGQIASDDGQIDVD   |
| Q5V7F4 | QFRLTDGLTTIESVSSPVEANGTLEVQGN TNRVPDNTITV    |
| Q5V7F4 | GSDGQWSVNV DLSVDIEPGNYTVEADDGDNTDRTSVTVVE    |
| P25062 | AFTGSAAAERGNLDADSESFNKTIQSGDRVFLGEEISTDAG    |
| P25062 | TENQPLGTYDVGSGSATPNVTL LAPRIDSEILTS SGGD     |
| P25062 | TEQAKEVFRNIGDTSEVGIANS SATNTSGSSTGPTVETADI   |
| P25062 | EVRNIGDTSEVGIANS SATNTSGSSTGPTVETADIAYAVV    |
| P25062 | GQFTTINGQVAPVETGTVDINGTASGANSVLVIFVDERGNV    |
| P25062 | TDTVNVEVVSEREDTTTSSDNATDTTTT TDGPTETTTTAEP   |
| Q50833 | KLTVKASAESDDANLKSLLTNGTNDFT EL DAGKEAFVVA A  |
| Q50833 | AGKEAFVVAADSDYSDALINATTGFANIADNVLYDQAKLA     |
| P27373 | LLLIVISMSGIAGAAEVKNLNTSKTFTKIQEAI DDPSTTDG   |
| P27373 | QEAI DDPSTTDGNI IIVGPGNYTENI LVNKSLTLKSNGSAI |
| P27373 | TTDGNIIIVGPGNYTENI LVNKSLTLKSNGSAI INAVSSEK  |
| P27373 | VGPGNYTENI LVNKSLTLKSNGSAI INAVSSEKSTITIKAN  |
| P27373 | NNVWIEGFIIIGGKNGIYMENV TGCTITNNTIQNAFVSGWE   |
| P27373 | IIIGGKNGIYMENV TGCTITNNTIQNAFVSGWEYGGNGIC    |
| P27373 | IQNAFVSGWEYGGNGICLVNSTNNTITNNI IRNNTWNGIN    |
| P27373 | AFVSGWEYGGNGICLVNSTNNTITNNI IRNNTWNGINVCE    |
| P27373 | GNGICLVNSTNNTITNNI IRNNTWNGINVCE SKGNI IKNNT |
| P27373 | IRNNTWNGINVCE SKGNI IKNNTIMYSGGIGIYVWGFNKFE  |
| P27373 | YVWGFNKFEGNNI IENNR IINATYGGIYLF RPSNNKICRNY |
| P27373 | YGGIYLF RPSNNKICRNY IANVSSGGGMSGAICIDVSDYN   |
| P27373 | FINYETAISDPKGELVDNIWNTTEGGNYWSNYTGNNTGDGT    |
| P27373 | PKGELVDNIWNTTEGGNYWSNYTGNNTGDGTGNI PYYDNK    |
| P27373 | LVDNIWNTTEGGNYWSNYTGNNTGDGTGNI PYYDNKPLVV    |
| P27373 | DPLSAGESQIVRWDKIVPEGNHTIKAEI PYS AEGYLIGTNI  |
| P27373 | IRDADISNNVFSKIVQGFVQNKFTTITLTLNLGKSTITIKYY   |

|        |                                            |
|--------|--------------------------------------------|
| P27373 | NLGKSTITIKYYISYITNPVNGTKVSYRELTITLKPNETKT  |
| P27373 | TNPVNGTKVSYRELTITLKPNETKTIELGKYPFKYAVSGTM  |
| P13611 | SGKVSLPCHFSTMPTLPPSYNTSEFLRIKWSKIEVDKNGKD  |
| P13611 | VARAQCGGGLLVRTLYRFENQTFPPDSRFDAYCFKPKE     |
| P13611 | EDLESVSASTTVSPLIMPDNNGSSMDDWEERQTSGRITEEF  |
| P13611 | EVRDMEEDFTATPGTKYDENITTVLLAHGTLSEEAATVSK   |
| P13611 | AHGTLSVEAATVSKWSWEDNNTSKPLESTEPSASSKLPPA   |
| P13611 | PPASTKFFHFDINVYIEVRENKTGRMSDLVIGHPIDSESK   |
| P13611 | II EIDLHSENEEEEEECANATDVTTTSPVQYINGKHLVT   |
| P13611 | KDPEAAEARRGQFESVAPSQNFSDSSESSTHPPFVIAKTELS |
| P13611 | ESDTHPFVIAKTELSTAVQPNESTETTESLEVTWKPETYPE  |
| P13611 | GEAEDEDTMFTMVDLSQRNTDITLITLDTSRITITESFFE   |
| P13611 | FSTEPTGLVLSTVMDRVVAENITQTSREIVISERLGEPNYG  |
| P13611 | TTKKTYSDDKEMKEEDTSLVMNSTPDPDANGLESYTTLEPA  |
| P13611 | LFSGLGSGEVLPPLPTESVNFTEVEQINNTLYPHTSQVES   |
| P13611 | EEVLPPLPTESVNFTEVEQINNTLYPHTSQVESTSSDKIED  |
| P13611 | GAEGPTVAPLPFSTDIGHFPQNTVRWAEIQTSRPQTITEQ   |
| P13611 | WAEIQTSRPQTITEQDSNKNSSTAEINETTSSSTDFLARA   |
| P13611 | SRPQTITEQDSNKNSSTAEINETTSSSTDFLARAYGFEMAK  |
| P13611 | AVTADGFPTVSVMLPLHSEQNKSSPDPTSLSNVTSYERST   |
| P13611 | SNDESNDSTQVQEIYEAAVNLSLTEETFEQSADVLASYTQ   |
| P13611 | EASPTELIAVEGTEILQDFQNKTDGQVSGEAIKMFPTIKTP  |
| P13611 | NPVEFNTEVATPPFSLLETSNETDFLIGINEESVEGTAYL   |
| P13611 | KITCMNPSAYQRTYSMKYFKNSSAKDNSINTSKHHRWSR    |
| Q6UVK1 | HTVVLTVEGWATLSVDGFLNASSAVPGAPLEVPYGLFVGG   |
| Q6UVK1 | DAEASRHLQEHRGLTPEATNASLGCMEDLSVNGQRRGLR    |
| Q6UVK1 | PAMELPEPCVPEPGLPPVFANFTQLLTI SPLVVAEGGTAWL |
| Q6UVK1 | IHRSTGLRLAQSAMPILPANLSVETNAVQDVSVLFVRTG    |
| Q6UVK1 | AYDTVENLALLEVQVQGEILSNLSFPVTIQRATVWMLRLEPL |
| Q6UVK1 | QHQTALLEVQASEPYLRVANGSSLVVPQGGQGTIDTAVLH   |
| Q6UVK1 | QPATAFSQQDLLDGAVLYSHNGSLSPRDTMAFSVEAGPVHT  |
| Q6UVK1 | LEGLVLEVLPAIIPLEAQNFVPEGGSLLAPPLLRVSG      |
| Q6UVK1 | LIRYVHDGSETLTDSEFVLMANASEMDRQSHPVAFVTVLPV  |
| Q6UVK1 | GPQLGRLFHAQQDSTGEALVNFTQAEVYAGNILEHEMPPE   |
| Q6UVK1 | GPVTRFTQADVDSGRLAFVANGSSVAGIFQLSMSDGASPPL  |
| Q6UVK1 | PTSAFSQFQIDQGEVVFATNFSSSHDHFRVLALARGVNAS   |
| Q6UVK1 | FTNFSSSHDHFRVLALARGVNASAVVNVTVRALLHVWAGGP  |
| Q6UVK1 | SHDHFRVLALARGVNASAVVNVTVRALLHVWAGGPWQGAT   |
| Q6UVK1 | WPQGATLRDPVLDAGELANRTGVSVPFRLEGPGRHGRVV    |
| Q00657 | HTVVLTVSNSWAVLSVDGVLNTSAPIPKASHLKVPYGLFVG  |
| Q00657 | DTEASRHLQEHRGLTPGAANISLVGCIEDFSVNGRRLGLR   |

|        |                                             |
|--------|---------------------------------------------|
| Q00657 | PVMDLPEPCVPEPGLPAVFANFTQLLTI SPLVVAEGGTAWL  |
| Q00657 | ILHNTGLRLAQGSAAA ILPANLSVETNAVGDVSVLFRVTG   |
| Q00657 | TQDTVEDLTLEVQVQETLSNLSFPVTIQRATVWMLQLEPL    |
| Q00657 | QHQATAMLEVQASEPYLHVANSSSLVVPQGGQGTIDTAVLH   |
| Q00657 | QSVTSFSQRDLLDGAILYSHNGSLSPQDTLALSVAAGPVHT   |
| Q00657 | LEGISVELEVLP TVIPLDVQNFVPEGGTRTLAPPLIQITG   |
| Q00657 | LIRYVHDGSETQTDGFILLANASEMDRQSQPMAFTITILPV   |
| Q00657 | GPQLGRLLHAQQGSAAEALVNFTQAEVNAGNILYEHEISSE   |
| Q00657 | GPVTHFTQADVDAGRLAFVANGSSVAGVQLSMSDGASPP I   |
| Q00657 | PASAFSQLQVDQGDVVFAFTNFSSQDHFVKVLALARGVNAS   |
| Q00657 | FTNFSSSQDHFVKVLALARGVNASATVNVTVQALLHVWAGGP  |
| Q00657 | SQDHFVKVLALARGVNASATVNVTVQALLHVWAGGPWPQGT T |
| Q00657 | WPQGTTLRLDPTVLDASELANRTGSMRFRLEGP RYGRVV    |
| Q8VHY0 | HTVVLTVSDSWAVLSVDGVLNNTSAPIPRASHLKATYGLFVG  |
| Q8VHY0 | DTEASRHLEHRLGLPGAANISLVGCIEDFSVNGRRQGLR     |
| Q8VHY0 | PAMELPEPCIPEPGLPAVFANFTQLLTI SPLVVAEGGTAWL  |
| Q8VHY0 | ILHNTGLHLAQGSAAA ILPANLSVETNAVGDVSVLFRVTG   |
| Q8VHY0 | TQDTVEDLILEVQVQETLSNLSFPVTIQRATVWMLRLEPL    |
| Q8VHY0 | QHQATAMLEVQASEPYLHVANSSSLVVPQGGQGTIDTAVLQ   |
| Q8VHY0 | QSVTSFSQRDLLDGAILYSHNGSLSPQDTLAFSVAAGPVHT   |
| Q8VHY0 | LEGISVELEVLP TVIPLDVQNFVPEGGTRTLAPPLVQITG   |
| Q8VHY0 | LIRYVHDGSETQTDAFVLLANASEMDRQSQPVAFITITILPV  |
| Q8VHY0 | GPQLGRLLHAQQGSAAEVLVNFTQAEVNAGNILYEHEMSSE   |
| Q8VHY0 | GPVTHFTQADVDAGRLAFVANGSSVAGVQLSMSDGASPP I   |
| Q8VHY0 | PASAFSQLQVDQGDVVVFVFTNFSSQDHFVKVVALARGVNAS  |
| Q8VHY0 | FTNFSSSQDHFVKVVALARGVNASATVNVTVQALLHVWAGGP  |
| Q8VHY0 | SQDHFVKVVALARGVNASATVNVTVQALLHVWAGGPWPQGT T |
| Q8VHY0 | WPQGTTLRLDPTVLDASELANRTGSMRFRLLAG RYGRVV    |
| Q71M36 | GSAIEAAELVRRSSLAWESRANDTREEAGLPAAGEDETSWTE  |
| Q71M36 | SSISLRPRPGDPGKDLASGENGTECRVGFVRHNGSCR SVCD  |
| Q71M36 | GKDLASGENGTECRVGFVRHNGSCR SVCDLFP SYCHNGGQC |
| Q95196 | GSAVEAAELVKGSPAWEPPANDTREEAGPPAAGEDEASWTA   |
| Q60676 | LSLILLTIPLALVARKDPKKNETGVLRLKLPVNASNANVKQ   |
| Q60676 | VARKDPKKNETGVLRLKLPVNASNANVKQCLWFAMQ EYNKE  |
| Q9V498 | EYLTQKEIILEKSYHGLIRENETLVEITPLIKVNEEKICNF   |
| Q9V498 | HSSIALKTKHISFGCDRDISNCTSGQVKDLLPHGAEWTK E   |
| Q9V498 | NRHSNPEVIDDWPLHAAHGVTSLAIGACYQSLNRLKHGF     |
| Q9V498 | KQKPTVGRRNIEVLTTLNCKNESSLRLPPIETIYIMVNEPIA  |
| Q9V498 | KSTNVLPSSLSKVNFIGNTDNETSFHRNNGSVNGDNNQPT    |
| Q8IWA5 | PLARRCFPAIHAYKGLVMGNETTYEDGHGSRKNITDLVEG    |
| Q8IWA5 | KGVLVMGNETTYEDGHGSRKNITDLVEGAKKANGVLEARQL   |

|        |                                             |
|--------|---------------------------------------------|
| Q8IWA5 | DDSPCFPTAKTCNPETFPSSNESRQCPNARCQFAFYGGESG   |
| Q91VA1 | IIVGLVAVVYGDPRQVLYPRNSTGAYCGVGNKDKPYVLYF    |
| Q91VA1 | PRFLLPSTPALGRCFPLPNINFNFTLPEDLRINNTTVSNGISG |
| Q91VA1 | LGRCFPLPNINFNFTLPEDLRINNTTVSNGISGLLDSINARDV |
| Q91VA1 | GRCFPLPNINFNFTLPEDLRINNTTVSNGISGLLDSINARDVS |
| Q91VA1 | LPNINFNFTLPEDLRINNTTVSNGISGLLDSINARDVSVKIFE |
| Q91VA1 | QQYQVFRDKGASITQLGFTTNFSAYQSVKETWLAALIVLAV   |
| Q91VA1 | AVTALYLATSGQPQYIYWASNTSTPGCENVVNMTCDPMAP    |
| Q91VA1 | PQYIYWASNTSTPGCENVVNMTCDPMAFLNSSCP NLKCVF   |
| Q91VA1 | STPGCENVVNMTCDPMAFLNSSCP NLKCVFKGYSTTGLAQ   |
| P16410 | NELTFLDDSICTGTSSGNQVNLTIQGLRAMDTGLYICKVEL   |
| P16410 | GLYICKVELMYPYPYLLGIGNGTQIYVIDPEPCPDSDFLW    |
| Q8BY89 | PLAQRCFPAIHASKGVLMVGNETTIEDGHGARKNITDLVEG   |
| Q8BY89 | KGVLMVGNETTIEDGHGARKNITDLVEGAKKANKILEARQL   |
| Q8BY89 | DDTACPLLRKTCNPETFPLRNEQLCPTARCQFAFYGGEST    |
| Q9VCR7 | NAQSSQLTVDSDHITVLLNSNETFLVFANGLLDS DVEVALG  |
| Q9VCR7 | SEDHLLLDPATFVYPAGSTRNQSVVITGLKAGNVKVVADSD   |
| P57757 | FIEKYESTVSLTAPPTVKLENGSSTNVNDITLGHPLNSTLVI  |
| P57757 | TVKLENGSSTNVNDITLGHPLNSTLVIITFEVTFRSKNLTIVE |
| P57757 | LGHPLNSTLVIITFEVTFRSKNLTIVELPDEVIVPRGEKNAS  |
| P57757 | SKNLTIVELPDEVIVPRGEKNASFQVTSQNIQVTVFLHGN    |
| P57757 | NASFQVTSQNIQVTVFLHGNHSNQTCPRIREFLVIHSRIVS   |
| P57757 | FQVTSQNIQVTVFLHGNHSNQTCPRIREFLVIHSRIVSIIN   |
| P30825 | INVVLVGFIMVSGFVKGSVKWQLTEEDFGNTSGRLCLNND    |
| P30825 | VSGFVKGSVKWQLTEEDFGNTSGRLCLNNDTKEGKPGVGG    |
| P30825 | KNWQLTEEDFGNTSGRLCLNNDTKEGKPGVGGFMPFGFSGV   |
| B2DCR8 | AAPPEIHTTRPNVPEEIKRPNSTEIETPAVKQLETPSIFLL   |
| B2DCR8 | KYPWYSWSIVTVKKMLANQRNSTLGNQFYEMEAVGPHGSNF   |
| B2DCR8 | ILVKYISDLQKLDYILKISFNYSKKKITVDAFSRRMKAFLS   |
| B2DCR8 | SKRRMRSYARYWERTSCPPLNVTHLTQTGCGALLSFEGMKV   |
| B2DCR8 | KCESSWSRWSKWSACASTCGNATQSRRRRCLGQSESEKIG    |
| Q20911 | TRSRILMVDGNVWLHAGKDKNITFKTTGNRIYVDETDVSK    |
| Q20911 | TDVSKLPDIASFQQLVGRIENTSQMFTTLKSRQDTQTSAMR   |
| Q20911 | QTSAMRVVLNSAKHYLVALRNMTELVNI LKKWKT DKMARDM |
| Q20911 | CPPHFTGTCEADIDECVYNGTTAGCQNNGTICINNRGGFE    |
| Q20911 | CEADIDECVYNGTTAGCQNNGTICINNRGGFECQCQSGYHG   |
| Q20911 | GRACEEEEHCGSHFTHSSGNYTFDLQRSNKTELSICDFVF    |
| Q20911 | HCGSHFTHSSGNYTFDLQRSNKTELSICDFVFNIPAAANSV   |
| Q20911 | EFDKFTQEGSGPTDCAKT DANLTLYDGPEDSSSEFATFCGD  |
| Q20911 | GFVLKYKFTTPDRECGAIDNDSNDFSGVIESPNYGLY       |
| Q20911 | IESPNYGLYPNMDCTWKINGTLSNGSYSGDMVLKLTDFE     |

|        |                                              |
|--------|----------------------------------------------|
| Q20911 | YGSLYPNMDCTW KINGT LSN GSYSGDMVLK LTFDEYDVKS |
| Q20911 | EQKGGRFRIQYEMLC EKR VNGNGTIQTWNFPNGGAAGTCTYI |
| Q20911 | EVTPAKSCEYDRVEIYTSYHNETHVH GELLGKFCGAMIPFSI  |
| Q20911 | DKCTYHIAVHENQRILIKMNNMSLPCDKSSLMFRNGPSETS    |
| Q20911 | SFSNRVTIVYK SINSEGSFFNLTYETITSGCGGRVDGLTGI   |
| Q20911 | TVAVALGNKVRFALTALDDLNSSDSGGFCPLFAANRIDFFD    |
| Q20911 | LKVD DTLAEAEVTFKKT DYNITNSVNKYCDKAI PRVIRSR  |
| Q20911 | PIGQINLKI DKMDILPIGTNCTYTKDFSGFAIFMSDSNKS    |
| Q20911 | GTNCTYTKDFSGFAIFMSDSNKS GTPFQTYCSSINQQNISS   |
| Q20911 | SDSNKSGTFFQTYCSSINQQNISSHTNELFLFLSMKKDKLK    |
| Q20911 | NELFLFLSMKKDKLKTNVFFNATVEFVDVPQSSQSDICGQV    |
| Q20911 | PYYHDDRKTDKPRFMSPTYANYTCKWYLAYNVGMLSFYEGN    |
| Q20911 | NYTCKWYLAYNVGMLSFYEGNSSSSPVERLCDES DTVQTF    |
| Q20911 | VYAESKPQTI SLYHEGEGICNVTIKKKDPQDSEINIRLEEY   |
| Q20911 | KKKDPQDSEINIRLEEYTKLNSSTHTIDDRIDIYVGGVLK     |
| Q20911 | NSNGNTVTL SILDHNLKSTPNCTDSYIEIRANNSGKLIK R   |
| Q20911 | LDHNLKSTPNCTDSYIEIRANNSGKLIK RQC DISSIDSTE   |
| Q20911 | DHNLKSTPNCTDSYIEIRANNSGKLIK RQC DISSIDSTEY   |
| Q20911 | KLEKSDKFSFTWDPVPLNYRNLTLAKDKPAKVYDCGGDLTP    |
| Q20911 | EENDVDLSSVSKHCALVRSNNTFNFSVNRALHIHFVTD RS    |
| Q20911 | DVDLSSVSKHCALVRSNNTFNFSVNRALHIHFVTD RSRHGI   |
| Q20911 | HSQYSKSKYCGKLEQGERLNFTSARGRLF I KYNSGPN SRK  |
| Q20911 | RRFVATYGIATCGGTVMVRENVTHITSPSPFPYFATPVQC     |
| Q20911 | SPNTHMIEAKVDHVWLFYNPNCTMEQLMIRDGNSTANPLIG    |
| Q20911 | HVWLFYNPNCTMEQLMIRDGNSTANPLIGPVCVPRHAPDVF    |
| Q20911 | HAPDVFTRSASNQITVQFTSNSTTRGRGRQYCSNKKCGFDV    |
| Q20911 | AVVEGFPYDGAQYSTYFCKNETQITSITDTIRIVYD DSHT    |
| Q20911 | VYD DSHTREMISAIGNDQPLNSTFYAPFTIDYMAIPANSEN   |
| Q20911 | DYMAIPANSENQGC TLQINKNLTFEFHLRNKVNGKVG LDS   |
| Q20911 | NPQIDLFI SQLFRDQEGQFNLTIEFQKCGGVISSPNTGDI    |
| Q20911 | PLCGIEHPKDFESESNRVLNFTTDSQTARGFRVNWEAEC      |
| Q20911 | TTVTSPAFLPYTKDLCVWNI TDPNRQLNIRFEEMKLEA      |
| Q20911 | AFHDCSADYIEFFDSSDIMANKTLGKFCGTMDKI PQYRIVT   |
| Q20911 | SHRHAFITFETDRDGTGRGFNISYSIVDSDCGGWLKATNEI    |
| Q20911 | HVSN TNTIQIIVSADIMPKNQSRPSLKFEYNILDSCNRTI    |
| Q20911 | PNKNQSRPSLKFEYNILDSCNRTIDTNTIKSGRLTSPNYPQ    |
| Q20911 | TNTIKSGRLTSPNYPQVYSENSTCVTNLQSSNQKMLLVFND    |
| Q20911 | PNNVNKNCYDY LMLKEGDSNGTY YCGSTLPKALMTSGKDL   |
| Q20911 | FADSYELEGVISSIGYPNGYNKSYTQIFTLRPPNSHDCSII    |
| O60494 | IQKNKEDI IELKGSAILGPQNISSQIYQLNSKLVDLERKFQ   |
| O60494 | QCIDTVSGYFCKCDSGWTGVNCTENINECLSNPCLNGGTCV    |

|        |                                              |
|--------|----------------------------------------------|
| 060494 | WTGALCQVPQQVCGESLSGINGSFSYRSPDVG YVHDVNCFW   |
| 060494 | SDQGFHITYLTSPS DLRCCGNYTDPEGELFLPELSGPFTH    |
| 060494 | THTRQCVYMMKQPQGEQIQINFTHVELQCQSDSSQNYIEVR    |
| 060494 | SSQNYIEVRDGETLLGKVCNGTISHIKSITNSVWIRFKID     |
| 060494 | PGERTCRWTHQPQSQVILLNFTVFEIGSSAH CETDYVEIG    |
| 060494 | TESTGTIQSPGHPNVYPHGINCTWHILVQPNHLIHLMFETF    |
| 060494 | VQPNHLIHLMFETFHLEFHYNCTNDYLEVYD TDSETSLGRY   |
| 060494 | WECIYRITVRTGQLIAVHFTNFSLEEAI GNYYTDFLEIRDG   |
| 060494 | IDTRSGFSAYWDGSS TGCGNLTTSSGTFISPNY PMPYYS    |
| 060494 | SSHGSAFELEFKDFHLEHHPNCTLDYLA VYDGPSSNSHLLT   |
| 060494 | QQGRGFKAEYRQTCENVVIVNQTYGILE SIGYPNPYSENQH   |
| 060494 | TYGILESIGYPNPYSENQHCNWTIRATTGNTVNYTFLAFDL    |
| 060494 | PYSENQHCNWTIRATTGNTVNYTFLAFDLEHHINCSTDYLE    |
| 060494 | ATTGNTVNYTFLAFDLEHHINCSTDYLELYDGP RQMGRYCG   |
| 060494 | TGNELAIRFKTDLS INGRGFNASWQAVTGGCGGI FQAPSGE  |
| 060494 | RSNTDCSWVIRVDRNHRVLLNFTDFDLEPQDSCIMAYDGLS    |
| 060494 | TSSFDTVSSPRFPANYPNNQNC SWIIQAQPPLNHITLSFTH   |
| 060494 | SFQLEDSQDCSRDFVEIREGNATGHLVGRYCGNSFPLNYSS    |
| 060494 | REGNATGHLVGRYCGNSFPLNYSSIVGHTLWVRFISDGS GS   |
| 060494 | SFFWPENYPHNSNYQWTVNVNASHVVHGRILEMDIEEIQNC    |
| 060494 | TGEYMFIRFTSDSSVTRAGFNASFHKSCGGYLHADRGII TS   |
| 060494 | HADRGII TSPKYPETYPNSLNC SWHVLVQSGLTI AVHFEPQ |
| 060494 | PPETRIQLQFEDRFDIEVTPNCTSNYLELRDGVDSAPILS     |
| 060494 | HLQGLSGHYLTISFEDFNLQNSSGCEKDFVEIWDNHTSGNI    |
| 060494 | EDFNLQNSSGCEKDFVEIWDNHTSGNILGRYCGNTI PDSID   |
| 060494 | IVFNGIRSNSPQLEKLCSSVNVSN EIKSSGNTMKVIFFTDG   |
| 060494 | SYTSSEDA VCGGSLPNTPEGNFTSPGYDGV RNYSRNLNCEW  |
| 060494 | GSLPNTPEGNFTSPGYDGV RNYSRNLNCEWTL SNPNQGNSS  |
| 060494 | VRNYSRNLNCEWTL SNPNQGNSSISIH FEDFYLESHQDCQF  |
| 060494 | GFYATWNTQTLGCGGIFHSDNGTIRSPHWPQNFPENSRC SW   |
| 060494 | QSQEAPAQGFSASFVSRCSNFTGPSGYIISP NYPKQYDNN    |
| 060494 | TGPSGYIISP NYPKQYDNNMCTYVIEANPLSVVLLTFV SF   |
| 060494 | QITDFGFKFSYRIISCGGVFN FSSGITSPAYSYADYPNDM    |
| 060494 | FDVVPSTSCSHDYLAIDGANTSDPLL GKFCGSKRPPNVKS    |
| 060494 | SDPLL GKFCGSKRPPNVKSSNMSMLLVFKTDSFQTAKGWKM   |
| 060494 | MSFRQTLGPQQCGGYLTGSNNTFASPDS DSNMGYDKNLNC    |
| 060494 | SGNFLTVQFISDLTLEREGFNATYTIMDMP CGGTYNATWTP   |
| 060494 | EREGFNATYTIMDMP CGGTYNATWTPQNISSPNS SDPDVVPF |
| 060494 | TYTIMDMP CGGTYNATWTPQNISSPNS SDPDVVPFSICTWVI |
| 060494 | DMPCGGTYNATWTPQNISSPNS SDPDVVPFSICTWVIDSPPH  |
| 060494 | LQLQDSPQGHGNSRFQFCGRNASAVPVFYSSMSTAMVIFKS    |

|        |                                            |
|--------|--------------------------------------------|
| O60494 | GWPDNYDNDKDCVTTLTAPQNHTISLFFHSLGIENSVECRN  |
| O60494 | FHSLGIENSVECRNDFLEVRNGSNSNSPLLKGYCGLLPNP   |
| O60494 | GTLYGDRGSFTSPGYPGTYPNNTYCEWVLVAFAGRLVTINF  |
| O60494 | ISIDDPGDCVQNYLTLYDGNASSPSSGPGYCGDTSIAPFV   |
| Q9JLB4 | LGECLEHQIRNKDDIIDLKRNTGLPQNILSQVHQLNSKLV   |
| Q9JLB4 | QCIEVTVSSYFCKCDSGWFQNCNENINECVSNPCLNGGTICI |
| Q9JLB4 | QAACGGILSGTQGTFAQQSPNDTYVHNVNCFWVVRTDEEKV  |
| Q9JLB4 | SDKGFHITYLTTPSDLYCGGNYTDEGELLPLTGPFSHS     |
| Q9JLB4 | SHSRQCVYLISQPQGEQIVINFTHVELESQRGCSHTFIEVG  |
| Q9JLB4 | CSHTFIEVGDHESLLRKCIGNETLFPFIRSISNNVWIRLRID |
| Q9JLB4 | AGRRTCRWTISQPPREVVLNFTDFQIGSSSSCDTDYIEIG   |
| Q9JLB4 | TESTGIESPGHPNVYPSGVNCTWHIVVQRGQLIRLVFSSF   |
| Q9JLB4 | IFVSDSALAHEGFSINYEAINASSVCLYDYNDFGRLSSPN   |
| Q9JLB4 | ALTARGFSAYWDASSTGCGNLTPTPGVLTSPNYMPYYS     |
| Q9JLB4 | ASRGSFFLLEFQDFHLEHHPNCSDYLAVFDGPTNSRLIN    |
| Q9JLB4 | QQGRGFEINRYQTCDNVIVNKTSGILESINYPNYDKDQR    |
| Q9JLB4 | TSGILESINYPNYDKDQRCNWTIQATTGNTVNYTFLEFDV   |
| Q9JLB4 | PYDKDQRCNWTIQATTGNTVNYTFLEFDVENYVNCSTDYLE  |
| Q9JLB4 | ATTGNTVNYTFLEFDVENYVNCSTDYLELYDGPQRIGRYCG  |
| Q9JLB4 | TDNELAIRFKTDSSLNDRGFNASWRAVPGCGGIFQVSRGE   |
| Q9JLB4 | RANTECSWIIQVEKYHRVLLNITDFLEATDSCCLMTYDGSS  |
| Q9JLB4 | TDSSDSISSPLYPANYPNQNCWTIEAQPPFNHIALSFTH    |
| Q9JLB4 | SFQLENSLNCNKDFVEIREGNATGHLMGRYCGNSLPGNYSS  |
| Q9JLB4 | REGNATGHLMGRYCGNSLPGNYSSIEGHNLWVRFVSDGSGT  |
| Q9JLB4 | SDSSKSGRGFLLEWFAVDVSNVTLPTIAPGACGGYMTGDT   |
| Q9JLB4 | TGEYMYIRFTSDGVTGAGFNASFQKSCGGYLHADRGITS    |
| Q9JLB4 | HADRGITSPKYPDNYLPLNCSWHVVLVQSGLTI AVHFEQP  |
| Q9JLB4 | PSGRSIQLQFEDQFNIEETPNCSASYLELRDGANSNAPVLS  |
| Q9JLB4 | EDFNLQSSPGCAKFVEI WENHTSGILLGRYCGNSIPSSVD  |
| Q9JLB4 | IVFNGIRNNSPRLQKLCRSRVNVTNEFKSSGNIMKVIFFTDG |
| Q9JLB4 | SYTSEDAVCGGTLPSVSGGNFSSPGYNGIRDYARNLDCEW   |
| Q9JLB4 | IRDYARNLDCEWTLSPNRENSISIHFLGLSLESHQDCTF    |
| Q9JLB4 | GFYATWNTNLTGCGGLHSDNGTIKSPHPQTFPENSRCWS    |
| Q9JLB4 | EEMPAQGFSAFISRCGRTFNSSTGDIVSPNFKHYDNNMN    |
| Q9JLB4 | DRSAVSGTCDYDGLHIKIGHNLSSTPLVTICGSETLRPLTI  |
| Q9JLB4 | VPSNLCSDYLEVFDGPSIGNRSIGKFCGSTLPQVIKSTNN   |
| Q9JLB4 | GNRSIGKFCGSTLPQVIKSTNNSLTLLFKTDSSTARGWKV   |
| Q9JLB4 | SGNFLTQVQFVSDISIQMRGFNATYTFVDMPCGGTYNATSMP |
| Q9JLB4 | QMRGFNATYTFVDMPCGGTYNATSMPQNTSSPQLSNIRPF   |
| Q9JLB4 | TYTFVDMPCGGTYNATSMPQNTSSPQLSNIRPFSTCTWVI   |
| Q9JLB4 | LELQDSEQTNGNQVTQFCGANYTTLPVFYSSGSTAVVFKS   |

|        |                                                |
|--------|------------------------------------------------|
| Q9JLB4 | FYWFQLEDSRQCMNDFLEVRNGSSSSSPLLKGYCSNLLPNP      |
| Q9JLB4 | GTLLENEGILANPGFPDSYPNNHCEWTIVAPSGRPLSVGF       |
| Q39547 | RYIYSIRSFGATIFKSTTILNASAPVVVSFSSRGNRATKD       |
| Q39547 | LNYPFGLSVSFSQTFNQYFNRTLTSVAPQASTYRAMISAP       |
| Q95RU0 | SALTFDESEELIYFNDLKHRNGSIFSLKRDLIAANHVAEQT      |
| Q95RU0 | LKRDLIAANHVAEQTIARTGNE SVGG LAYDPLNMNLFWSDT    |
| Q95RU0 | GRPDGVAVDVCRRKLYWTSNVTHPTVERINLDGSNRTV I I     |
| Q95RU0 | YWTNSNVTHPTVERINLDGSNRTV I I SSNIDMPRGIVVDQL   |
| Q95RU0 | STDFKDPFVAEDCPLVRVANLSEEAR GIVARTGFYQRLQK      |
| Q95RU0 | ENEAPSCCECPAKFGGARCEQNSTEICSLFCRLKHEPEMYV      |
| Q95RU0 | EPEMYVFPFGCHSICEELA QDNSTNIAIPQYQHLEVCLTPRV    |
| Q6UX04 | SRLRFNRRGLVAMANAGSHDNGSQFFFTLGRADELNKHTI       |
| Q6UX04 | RLKKEKPEEEVKLKP KGTKNFSLLSFGEEAE EEEEEVNRV     |
| P97792 | DLKGRVHF TSN DVKSGDASINVTNLQLSDIGTYQCKVKKAP    |
| P61073 | VYVGWV I PALLLTI PDFI FANVSEADDRYICDRFY PNDLWV |
| P04839 | SAIHTIAHLFNVEWCVNARVNNSDPYSVALSELGDRQNESY      |
| P04839 | ARVNNSDPYSVALSELGDRQNESYLN FARKRIKNPEGGLYL     |
| P04839 | AIHGAERIVRGQTAESLAVHNITVCEQKISEWGIKECFIP       |
| P15425 | FGKLAPKTVANFRHICLRGINGSYVGSRFHRVVD RFLVQG      |
| O76096 | IKTNDPGVLQAARYSVEKFNNCTNDMFLFKESRITRALVQI      |
| O76096 | GRTTCKKNQH LRLDDCDFQTNHTLQTLSCYSEVWVWPWLQ      |
| P50488 | ESEAAEKEWANTLVSKVAQSNGTGTIKVSAPAKPTLRMDN       |
| P50488 | EAHLKAVGCLAVFGLPTQEINSTE PYLKVDKPQYKSLGCMF     |
| P50488 | PQYKSLGCMFYQHADSMNCENESSCRQGRSFRGGIGMCCCS      |
| P08174 | EKDSVICLKGSQWSDIEEFCNRSCEVPTRLNSASLKQPYIT      |
| Q14118 | PLDTDKGVHYISVSATRLGANGSHIPQTSSVFSIEVYPEDH      |
| Q14118 | NDIHKKIALVKKLAFAFGDRNCSTITLQNI TRGSIVVEWTN     |
| Q14118 | LVKKLAFAFGDRNCSTITLQNI TRGSIVVEWTNNTLPLEPC     |
| Q14118 | NCSTITLQNI TRGSIVVEWTNNTLPLEPCPKEQIAGLSRRI     |
| Q24114 | ESIDIKSSGTYSKGAICGGNCCNATELELRDKAAGMFEQ        |
| Q24114 | IKSSGTYSKGAICGGNCCNATELELRDKAAGMFEQLLHH        |
| Q24114 | LETNAKQFQSHVLELAQI SENMTHSLFSKVYTRMVPSSRMM     |
| Q24114 | SRMMIHQLYTEIMNHLYTSNYTNSNGQLGRRGIGSVQSNL       |
| Q63155 | LHFVSEPSDAVTMRGGVLLNCSAESDRGVPVIKWKDGLI        |
| Q63155 | WKKDGLILALGMDDRKQQLPNGSLIQNILHSRHHKPDEGL       |
| Q63155 | VIQLRSKKYSLGGSNLLISNVTDDDSGTYTCVVYKNENI        |
| Q63155 | SNVTDDDSGTYTCVVYKNENISASAELTVLVPWFNLHPS        |
| Q63155 | NIQTFTVFFSREGDNRERALNTQPGSLQLTVGNLKP EAMY      |
| Q63155 | VSTDDITVVVTLSDVPSAPPQNVSVLEVNSRSIKVSWLP PPS    |
| Q63155 | LFTGLEKGSQYSFQVSAMTVNGTGPPSNWYTAETPENDLDE      |
| P80219 | GFLVREDFVLTAAHCLGSSINVTLAGHNIMERERTQQVIPV      |



|        |                                             |
|--------|---------------------------------------------|
| Q08345 | LLSYTAPVQTMYLSEAVYLNDSYDGHVGGGLQYGGGLGQL    |
| Q08345 | DFRKSQELRVWPGYDYVGSNSHSFSSGYVEMEFEDRLRAF    |
| Q08345 | FLFAGPWLLFSEISFISDVVNNSSPALGGTFPPAPWPPGPGP  |
| Q08345 | LFAGPWLLFSEISFISDVVNNSSPALGGTFPPAPWPPGPP    |
| Q08345 | PALGGTFPPAPWPPGPPPTNFSSLELEPRGQQPVAKAEGS    |
| Q10025 | KFLRSAAHWKSRLMLGCTWPNGTSCKLSDFKAVWTTTGLCW   |
| Q10025 | DACTKHFRTKTLPLGLKILIIYNQTDIPDSSMNGVNVPSGYSM |
| Q10025 | RYMTEVENSCHCTLRRAYTSNSTDKMKACNVQYFGCAQK     |
| Q10025 | LIEEQEEDDEDVEQEELDENVSFSTVSGGETFSCEDSAYL    |
| Q10025 | ERYKVGWHYDTFSGVADRLSNLTCFSNFSERHRDIISILES   |
| Q10025 | WHYDTFSGVADRLSNLTCFSNFSERHRDIISILESRPITSE   |
| Q10025 | SEEKQANQMFLLDETAFNRNATRYMSVGDLSRYGDKVDD     |
| P81160 | LFLLLVVLASLGLALSQDRNDTEWISQKDKREKWCRLNLG    |
| P83553 | SSVYDVLLDRQWEPGCRTEVNTQTCSTSGYANDFGLPLSY    |
| P28845 | VAQAGKLMGGLDMLILNHITNTSLNLPHDDIHHVRKSMEVN   |
| P28845 | VNFLSYVVLTVAAALPMLKQSNQSI VVVSSLAGKVAYPMVAA |
| P28845 | KFALDGGFFSSIRKEYSVSRVNVSI TLCVLGLIDTETAMKAV |
| Q01459 | GSQVTFDVAWSFKNIDRRCYNYTGIADACDFLFVMSYDEQS   |
| Q01459 | SYDEQSQIWSECIAAANAPYNQTLTGYNDIKMSINPKKLV    |
| Q01459 | INPKKLVMGVPWYGYDYTCLNLSEDHVCTIAKVPFRGAPCS   |
| Q01459 | APCS DAAGRQVPYKTIMKQINSISGNLWDKDQRAPYYNYK   |
| Q09165 | RRVKRAPTRNNRPEPVVVRNGTQKCVISADRASHFCGMEE    |
| Q09165 | DNLRLRIIQYYRQQKHKQKKNATFSPKSFVVKYHCDYGYE    |
| Q09165 | PPRIYIEPQGPYEVAPGGNINISCTSVAYPPFDIYWFKNQK   |
| Q09165 | KEIYRNEEFTCVSDNIHGSANRTVSI VVTGPGSAPHLKSAS  |
| Q09165 | NIVEGDEIRVPPMTAFEIDCNVTRADVPVVLVWLHKGRPLN   |
| Q09165 | ESTQFSCVAENEAGKSTKINVTVTGPSAPERIRYQIDGDK    |
| Q09165 | KDPDAPLSDWESKTPADTRNLTVNVDEDTPYVVKVQART     |
| Q09165 | FRCVADGRPMPSVSYSWLPINASESGDEPVPIPIHSDDSQP   |
| Q09165 | GAPIDAPTDVLPVSVSIDNTVNITWSPPTQPLGPIKSYTVYF  |
| Q09165 | PVRFETGSGEIPPTITLDPNSNTYTVPELGAATITCTATGV   |
| Q09165 | IKTLPLAPQAITNPIIQVHPNNSVTIEFTPPDDPENPGKKV   |
| Q09165 | TANKPTTISVQYEVPSIPNGNISKYIIYYTPLDDQDPDHQL   |
| Q09165 | GVEGSTTIQILPGSQMTIACNATGIPLPQVKWIKAGNYEID   |
| Q09165 | IDPSRVDADGNHAQFSLQVANITEDTTFNCVAQNPLGHANW   |
| Q09165 | ANITEDTTFNCVAQNPLGHANWTINVNLIIEGLEPNWRDDFV  |
| Q09165 | TDYGVTYSDTVTTPDGIPLSNDSTGAFTEDGTVIENNEDG    |
| Q09165 | VPTESTNGVPLNKDGTPLPTNDSGHFVVLVLPGATVNDKPT   |
| Q09165 | TPLPTNDSGHFVVLVLPGATVNDKPTDEVIIVSITNPDGTL   |
| Q09165 | KNGKASDDYSSAVKSLKAERNVTVFVVDAGDDESQQQNSEL   |
| Q09165 | AIALYGLNAARQQFQLHGRENATKVIVILITNGKNRGNAAAA  |

|        |                                              |
|--------|----------------------------------------------|
| Q09165 | IELIPLSPSSLVSWTCCTNNKSNYTILYTHDTSITKEKWI     |
| Q09165 | IPLSPSSLVSWTCCTNNKSNYTILYTHDTSITKEKWIRKE     |
| Q09165 | NELPSDHTYTVCVMTNERVDNSTALAIIDKNCDLHIDQNTT    |
| Q09165 | VDNSTALAIIDKNCDLHIDQNTTAPEDYVKPSPSSCNCQCS    |
| Q9SUQ8 | PCKHFSFYFHDILYDGDNVANATSAAIVSPPLGNFKFGKF     |
| Q9SUQ8 | FYFYDMKMDFNWFSYTLVFNSTEHKGTLNIMGADLMMEPT     |
| Q96SL1 | LSYLGACAFVGVPLVVPAPNGTSPLLAAESSRAHIKDRIE     |
| Q9VNJ5 | HRRRNKHKNRNKNKRKEQNQSSHEHHDVAQKMMQFKKRL      |
| Q9VNJ5 | NLGFDTWIGDSGVFRDYEITNDSASSSLEPTRRTEQIEYGH    |
| Q9VNJ5 | DSASSSLEPTRRTEQIEYGHNTTSVDEEEHQQRVQTKKSTW    |
| Q9VNJ5 | FCDS SPRKEYSHFVVQRI GP NATDSLFDLNGLLAMCQLQDQ |
| Q9VNJ5 | MLTTECCRPWSLPNYAAMLANKSSCFDLTTEDVTSLHTLLL    |
| Q9VNJ5 | RLNIVFNVLNFLTDFSFTKSNDNSVYLKYAMIFIPVAQSNR    |
| Q9VNJ5 | DDGDYTNPN SYGHLHYDNNFNVS SRPAQLWILDFCQSVRQQ  |
| Q9VNJ5 | GPKFAEAPRLETEDYLGMSGNE SAEYSTNGSF TPLLVKALV  |
| Q9VNJ5 | RLETEDYLGMSGNE SAEYSTNGSF TPLLVKALVIEFESNVA  |
| Q9UBS4 | FRIKVVKHPIFERRGDDLYTNVTISLVESLVGFEMDITHLD    |
| Q9UBP4 | EAAAKASSEVNLANLPPSYHNETNTDTKVGNNTIHVHREIH    |
| Q9UBP4 | NLANLPPSYHNETNTDTKVGNNTIHVHREIHKITNNQTGQM    |
| Q9UBP4 | DTKVGNNTIHVHREIHKITNNQTGQMVSETVITSVGDEEG     |
| Q9UBP4 | CCGDQLCVWGHCTKMATRGSNGTICDNQRDCQPGLCCAFQR    |
| Q09163 | WDGKFCEIDVRACTSTPCANNCTCVDLEKGGQYEC SCTPGFS  |
| Q09163 | VDDEGQASHASCLCPPGFSGNFCEIVAATNSCTPNPCENDG    |
| Q09163 | ASCLCPPGFSGNFCEIVAATNSCTPNPCENDGVCTDIGGDF    |
| Q09163 | HELPVQQPEQHILKVMKELNKSTPLLTEGQAICFTILGVL     |
| P80370 | WDGELCDRDVRA CSSAPCANNRTC VSLDDGLYEC SCAPGYS |
| P80370 | VDDEGRASHASCLCPPGFSGNFCEIVANSCTPNPCENDGVC    |
| P80370 | SHASCLCPPGFSGNFCEIVANSCTPNPCENDGVCTDIGGDF    |
| P28078 | LPHSWAVLEASTPVLWDDPQNHTFRHTLFCQDGI PNIGLSE   |
| Q9UGM3 | NARFGQSGPIVLD DVRC SGNESYLWSCPHNGWLSHNCGHS   |
| Q9UGM3 | TITLPPSTVGSSESLTLRLVNGSDRCQGRVEVLYRGSWGTV    |
| Q9UGM3 | NARFGQSGPIVLD DVRC SGNESYLWSCPHKGWLT HNCGHH  |
| Q9UGM3 | LTHNCGHHEDAGVICSATQINSTTDDWWHPTTTTARPSSN     |
| Q9UGM3 | VNSGYRINLGF SNLKLEAHHNCSFDYVEIFDGLNS SLLLG   |
| Q9UGM3 | KLEAHHNCSFDYVEIFDGLNS SLLLGKICNDTRQIFTSSY    |
| Q9UGM3 | DYVEIFDGLNS SLLLGKICNDTRQIFTSSYNRMIHFRSD     |
| Q9UGM3 | GFLAWYNSFP SDATLRLVNLNS SYGLCAGRVEIYHGGTWGT  |
| Q9UGM3 | REDAGVICSGNHLSTPAPFLNITRPNTDYSCGGFLSQPSGD    |
| Q9UGM3 | ISDHSITRRGFRAEYYSFSNDSTNLLCLPNHMQASVRSY      |
| Q9UGM3 | PNLVIFTIPYSGCGTFKQADNDTIDYSNFLTA AVSGGIKR    |
| Q9UGM3 | RIHVSCRMLQNTWVDTMYIANDTIHVANNTIQVEEVQYGNF    |

|        |                                            |
|--------|--------------------------------------------|
| Q9UGM3 | MLQNTWVDTMYIANDTIHVANNTIQVEEVQYGNFDVNI SFY |
| Q9UGM3 | IHVANNTIQVEEVQYGNFDVNI SFYTSSSFLYPVTSRPPYV |
| P28068 | LRNGLQNCATHHTQPFWGSLTNRTRPPSVQVAKTTFNTREP  |
| Q9XWC3 | ASAKTCKYDSSDFEVYWRFANN SINMQFMNTDIKNNWTV   |
| Q9XWC2 | LVMNWNVKNKIQIHFEHNNLTENRWTSTAFGDGPGMNNL    |
| Q9XWC2 | ITGNKLVTVSRPLGPAGPRNFSLDQCLNWMVPPGGSLNG    |
| P00639 | GLSLKIAAFNIRTFGETKMSNATLASIYIVRIVRRYDIVLIQ |
| P24855 | AVSLKIAAFNIQTFGETKMSNATLVSYIVQILSRVDIALVQ  |
| P24855 | PDQVSAVDSYYYDDGCEPCGNDTFNREPAIVRFFSRFTEVR  |
| P11936 | ALSLRIA AFNIRTFGETKMSNATLSNYIVRILSRVDIALIQ |
| P11936 | PDQVSVLDSYLYDDGCEPCGNDTFNREPSVVKFSSPSTQVK  |
| O18998 | AGSLKIAAFNIRSFGETKMSNATLSYIVRILQRYDIALIQ   |
| O42446 | SNSLLLGAFNIKSFQDTHKASNATLMNIITKIVKRYDVILIQ |
| Q8NFT8 | GNASSNSAGGRLVSFEVQNTSVKIRQDATASLILLWKVT    |
| Q8NFT8 | KDPCANVSCNLGATCSDGLNGTICAPGFTGEECDIDINE    |
| O00115 | ALINSPEGAVGRSLQPLYSNTSQLAFLLYNDQPPQPSKAQ   |
| O00115 | QEFPDLENVVKGHVSVQEPWNSSITLTSQAGAVFQSFQKFS  |
| O00115 | ALGTNLQVQFWHKTVGILPNSCSDIWQVLNVNQIAFPGPAG  |
| O00115 | IWQVLNVNQIAFPGPAGPSFNSTEDHSHKWCVPKGPWTCVG  |
| P49184 | HTAAAFDFPFSFQLTEEEALNISDHYVVEVELKLSQAHSVQ  |
| P15101 | GTVHLVYGFLEELRSLESINTSGLHTGLQRVQLLKPSPK    |
| P15101 | SFNREVLKALYGFAPISMHCNRSSAVRFQGEWNRQPLPEIV  |
| P09172 | ESPLPYHIPLDPEGSLELSWNVSYTQEA IHFQLLVRRLKAG |
| P09172 | GTVHLVYGILEEPPFRSLEAINGSLQMGQLQRVQLLKPNIPE |
| P20036 | GGLANIAI LNNNLTLIQRSNHTQATNDPPEVTVFPKEPVE  |
| P20036 | ELGQPNTLICHIDKFFPVLNVTLNCGELVTEGVAESLFL    |
| P16444 | NDLPWQLLDMFNRLQDERANLTTLAGTHTNI PKLRAGFVG  |
| P16444 | TDSLVMVNFYNNYISCTNKANLSQVADHLDHIKEVAGARAV  |
| P16444 | PEGLEDVSKYPDLIAELLRRNWTEAEVKGALADNLLRVFEA  |
| P16444 | VKGALADNLLRVFEAVEQASNLTAPEEEPIPLDQLGGSCR   |
| Q9H4A9 | DLPLVLRQVYQKGLQDVNLRNFSYQTSLDRLRDGLVGAQF   |
| Q9H4A9 | IRRMCASYSLELVTSAKALNDTQKLA CLIGVEGGHSLDNS  |
| Q9H4A9 | HTCNTPWAESSAKGVHSFYNNISGLTDFGEKVVAAEMNRLGM |
| P22412 | NDLPWQLLNLFNQLQDPGANLSSLAHTHTNI PKLKAGFVG  |
| P22412 | TGSLVMVNFYNDYVSCSAKANLSQVADHLDHIKKVAGAAAV  |
| Q18253 | FSVIFTFMQNPINLNSDNGFNQTS GNTSSLEATTLKPKFSS |
| Q18253 | TFMQNPINLNSDNGFNQTS GNTSSLEATTLKPKFSSLMTTT |
| Q18253 | KVNELWRHSAEYLYHIVKINNKTVSTEQWHVGPENSLIQA   |
| Q18253 | EQWHVGPENSLIQA FYWNPASSNDFVYVHNHNYLYYQKDP  |
| Q18253 | TDDDSYVEYFELPYKAGVQNNLTVTQYIW DSENHKIVETA  |
| Q18253 | LSAANGDYVLTNKWITMPRNGSDLGEEERLVTVWANRQNH   |

|        |                                              |
|--------|----------------------------------------------|
| Q18253 | GQPAENLQGYINTNVI PHARNVTNVKYL LAHGERDDNVHYQ  |
| Q7JKY3 | AALVFFTP LFAAKSFGSWRLNVSDLRSLRYPYAEFAFTDNN   |
| Q7JKY3 | ADRKYFAMMDHAPNPGMNFQNETFHLKIVNNNERLNPLLPF    |
| Q7JKY3 | WWSTRGDQLAYASYDNHLTKNVSLKTYHRLEPYPIDTNFHY    |
| Q7JKY3 | VQLKDSLSYHYLLAVKWLEINGTEQLVSVWVTNRYQNEVALT   |
| Q7JKY3 | SYSLADESRNSAYCISCSIKNCTWAQAQMDDMKTAIVSCK     |
| Q7JKY3 | QMKTAIVSCKGPAAPHTAIVNLTRMDSDKKTEHANLLYDKT    |
| Q8N608 | SLEDLFRKDFVLHDPEARWINDTDVVYKSENGHVIKLNIET    |
| Q8N608 | DTDVVYKSENGHVIKLNIETNATTLLENTTFVTFKASRHS     |
| Q8N608 | ENGHVIKLNIETNATTLLENTTFVTFKASRHSVSPDLKYV     |
| Q8N608 | HSHIAHWVSPDGERLAFMINDSLVPMTVI PRFTGALY PKG   |
| Q8N608 | TMVKWVSNKTKTVVRWLNRAQNI SILTVCETTTGACSKKYEM  |
| Q8N608 | TKVHFQHS AELIKHLIKAGVNYTMQVY PDEGHNVSEKSKYH  |
| Q9UHL4 | GFQERFFQQRLDHFNFERFGNKTFPQRFLVSDRWFVRGEGP    |
| Q9UHL4 | RGEGPIFFYTGNEGDVWAFANNSAFVAELAAERGALLVFAE    |
| Q9UHL4 | RLLESAQRITGLRALAGLVYNASGSEHCYDIYRLYHSCADP    |
| Q9UHL4 | TGCGTGP DARAWDYQACTEINLTFASNVTDMFPDLPTDE     |
| Q9UHL4 | DARAWDYQACTEINLTFASNVTDMFPDLPTDELRQRYCL      |
| Q9UHL4 | SNII FSNGLDPWAGGGIRRNL SASVIAVTIQGGAHHLDR    |
| P27487 | DHEYLYKQENNILVFNAEYGNSSV FLENSTFDEFGHSINDY   |
| P27487 | QENNILVFNAEYGNSSV FLENSTFDEFGHSINDYSISPDGQ   |
| P27487 | ASYDIYDLNKRQLITEERIPNNTQWVTWSPVGHKLAYVWNN    |
| P27487 | TDWVYEEVFSAYSALWWSPNGTFLAYA QFNDTEVPLIEYS    |
| P27487 | SAYSALWWSPNGTFLAYA QFNDTEVPLIEYSFYSDSLQYP    |
| P27487 | AVNPTVKFFVVTNDSLSSVTNATS IQITAPASMLIGDHLYC   |
| P27487 | CDVTWATQERISLQWLRRIQNYSVMIDICYDESSGRWNCLV    |
| P27487 | LDKMLQNVQMP SKKLDFI ILNETKFWYQMI LPPHFDKSKKY |
| P27487 | VYTERYMGLPTPEDNLDHYRNSTVMSRAENFKQVEYLLIHG    |
| P28843 | DFEYLYKQENNILLLNAEHGNSSI FLENSTFESFGYHSVSP   |
| P28843 | QENNILLLNAEHGNSSI FLENSTFESFGYHSVSPDRFLVLL   |
| P28843 | SYNIYDVNKRQLITEEKIPNNTQWITWSP EGHKLAYVWKND   |
| P28843 | TDWVYEEVFGAYSALWWSPNNTFLAYA QFNDTGVP LIEYS   |
| P28843 | GAYSALWWSPNNTFLAYA QFNDTGVP LIEYSFYSDSLQYP   |
| P28843 | CDVVWATEERISLQWLRRIQNYSVMAICDYDKINLTWNCPS    |
| P28843 | QWLRRIQNYSVMAICDYDKINLTWNC PSEQQHVMSTTGWV    |
| P28843 | LDRMLQDVQMP SKKLD FIVLNETRFWYQMI LPPHFDKSKKY |
| P28843 | VYTERYMGLPIPEDNLDHYRNSTVMSRAEHFKQVEYLLIHG    |
| P22411 | DHEYLYKQENNILLFNAEYGNSSIFLENSTFDELGYSTNDY    |
| P22411 | QENNILLFNAEYGNSSIFLENSTFDELGYSTNDYSVSPDRQ    |
| P22411 | SAYSALWWSPNGTFLAYA QFNDTEVPLIEYSFYSDSLQYP    |
| P22411 | AGAENPTVKFFVVDTRT LSPNASVTSYQIVPPASVLIGDHY   |

|        |                                            |
|--------|--------------------------------------------|
| P22411 | CGVTWVTEERISLQWIRRAQNYSIIDICDYDESTGRWISSV  |
| P22411 | VYTERYMGLPTPEDNLDYRNSTVMSRAENFKQVEYLLIHG   |
| P14740 | DSEYLYKQENNILLFNAEHGNSIFLENSTFEIFGDSISDY   |
| P14740 | QENNILLFNAEHGNSIFLENSTFEIFGDSISDYSVSPDRL   |
| P14740 | ASYSIYDLNKRQLITEEKIPNNTQWITWSQEGHKLAYVWKN  |
| P14740 | NDWVYEEEIFGAYSALWWSPNGTFLAYAQFNDTGVPLEIYS  |
| P14740 | GAYSALWWSPNGTFLAYAQFNDTGVPLEIYSFYSDLSQYP   |
| P14740 | CDVAWVSEDRISLQWLRRIQNYSVMAICDYDKTTLVWNCPT  |
| P14740 | LDKMLQDVQMPKSKLDFIVLNETRFWYQMLPFPDFKSKKY   |
| P14740 | VYTERYMGLPTPEDNLDHYRNSTVMSRAENFKQVEYLLIHG  |
| P42658 | DTEFIYREKQGTVRLWNVETNTSTVLEGGKIESLRAIRYE   |
| P42658 | KTHIAHWSPDGTRLAYAAINDSRVPIMELPTYTGSYPTV    |
| P42658 | TMVKWATSTKVAVTWLNRAQNVSIILTLCDATTGVCTKKHED |
| P42658 | AIPQGGRGKPHYITVSSSQPNSSNDNIQSITSGDWDVKIL   |
| P42658 | YSANTVGNFNRQCLSCDLVENCTYFSASFHSMDFFLKCE    |
| P42658 | SMDFFLLKCEGPGVPMVTVHNTTDKKKMFDELTNEHVKKAI  |
| P42658 | EKIHFQHTAELITQLIRGKANYSLQIYPDESHYFTSSSLKQ  |
| P01903 | GALANIAVDKANLEIMTKRSNYTPITNVPPEVTVLTNSFVE  |
| P01903 | ELREPVLICFIDKFTPPVNVNVTWRNGKPVTTGVSETVFL   |
| P79483 | FAGDTRPRFLELRKSECHFFNGTERVRYLDRYFHNQEEFLR  |
| Q30154 | LAGDTRPRFLQQDKYECHFFNGTERVRFHRDIYNQEEDLR   |
| P21918 | PWEEDFWEFDVNAENCSSLNRTYAISSSLISFYTPVAIMI   |
| P55849 | VLSAREKKVFRKRHTKEPVHNRSKRRWAPIPCSLMENS LGP |
| P55849 | ENSLGPPQHIIQQIQSDAAQNYTIFYSISGPGVDKEPYNLF  |
| P55849 | DLRTVKVLDRESKFKVNNQYNI SVVATDTAGRSCGTGLVVL |
| P55849 | LEPTDLGPDNGPPFQFLLDNSSKLTLESQDGKRAILRQ     |
| Q02487 | ICRLLLLTLAILIFASDACKNVTLHVPSKLDKAEKLVGRVNL |
| Q02487 | ENSLGPPFLFLQQVQSDTAQNYTIYYSIRGPGVDQEPNLF   |
| Q02487 | EILRVTVEDKDLVNTANWRANYTILKGNENGNFKIVTDAKT  |
| Q02487 | SIKVFRSLDREAETIKNGIYNITV LASDQGGRTCTGTLGII |
| Q02487 | DFSLESSTSEVQRMWLKAINDTAARLSYQNDPPFGSYVVP   |
| P55850 | ENSLGPPFLFLQQVQSDAAQNYTVFYSISGRGADQEPNWF   |
| P55850 | EILRIPVDDKDMINTANWKNFTILKGNENGWFKITTDVPT   |
| P55850 | LLTISKTLDREIIAPRNDMYNITVMAIDQEGKSCGTGLAVN  |
| P55850 | QFNLANTSPEVNRIWTINQVNDTAARLSYQKTADVQIYNVP  |
| Q7TSF1 | VGIDQPPYGIFINQKTGEINITSIVDREVTFFFIIYCRAL   |
| Q7TSF1 | TTFLGQIEENSANLTMVKNLATADEPNLNLSMIAFKIIR    |
| Q03763 | VGIDQPPYGIFVINQKTGEINITSIVDREVTFFFIIYCRAL  |
| Q03763 | STFVGEIEENSANLTMVKNLATADEPNLNLSKIAFKIIR    |
| Q03763 | TGTIVINLEGGWKTERPNVNGSTTSAYGLTSGGVTNGYT    |
| Q02413 | LVVVEVNSEFRIQVRDYNTKNGTIKWHSI RRQKREWIKFAA |

|        |                                              |
|--------|----------------------------------------------|
| Q02413 | VGIDQPPYGI FVINQKTGEINITS IVDREVTFFFIIYCRAL  |
| Q02413 | ATFAQQIEENSANLTVMLNATDADEPNLNSKIAFKIIR       |
| Q7TSF0 | VGIDQPPYGI FII NQKTGEINITS IVDREVTFFFIIYCRAL |
| Q7TSF0 | TTFLGQIEENSANLTVMKNLNDADPNLNSMIAFKIIR        |
| Q7TSF0 | KGCVFQPGSKTFIVDSRMEANHTVGEFLATDCETGQATNKF    |
| O55111 | KGITEPPFGIFVFDRTNGELNITS ILDREETPYFLLTGYAL   |
| O55111 | EVMRIKVTDADEVGSDNLANFTFASGNEGGYFHIEDTDTQT    |
| O55111 | SVTSEIKLVKIPDFESRYVQNGTYTAKVVAISKEHPQKTIT    |
| O55111 | DNCPVLVDSVRSVCEDEPYVNVTAEDLDGAQNSAPFSFSII    |
| P32926 | VGIDQPPFGIFVVDKNTGDINITA IVDREETPSFLITCRAL   |
| P32926 | QIFMGEIEENSASNSLVMILNATDADEPNHLNSKIAFKIVS    |
| P32926 | SKTAEIKFVKNNRSTFIVNKTI TAEVLAIDEYTGKTSTG     |
| P32926 | TFALEDQPVKLPVWSITTLNATSALLRAQEIPPVGVHIS      |
| Q14126 | KGITEPPFGIFVFNKDTGELNVTS ILDREETPYFLLTGYAL   |
| Q14126 | DVFGSVEELSAHTLVMKINATDADEPNTLNSKISYRIVS      |
| Q14126 | EVTRIKVFDADIGSDNLANFTFASGNEGGYFHIEDTAQT      |
| Q14126 | SVTSEIKLAKLPDFESRYVQNGTYTVKIVAISEDYPRKTIT    |
| Q14126 | DNCPVLIEPVQTI CHDAEYVNVTAEDLDGHPNSGPFVSFVI   |
| O61213 | AGSRLHRDARSYSDGVYSVNNSLPSARELSDILFKGESGI     |
| O61213 | QKIIAYDFVPGLLGEDVRLSNYTKYMPHVPPGISHAFGAAA    |
| O61213 | LQKDVFFKQEGDPCQPFPQVNTTGLEPCVPMQSTYWTNDND    |
| O61213 | VNTTGLEPCVPMQSTYWTNDNTTYVFTLIGLACVPLICYG     |
| Q8IVF4 | LANTVQENAKSWVILGKLLNESAKEELYNLHEEMEHLAKN     |
| P52407 | GMQGNLPPVSEVIALYKKSNI TRMRIYDPNRAVLEALRGS    |
| P52407 | PEVEKHGFLFFPNKQKYNLNFSAEKNWDISTEHNATILFL     |
| Q9Z2B5 | LQRTQKTVRAVGPRSGSEKWNFSVGHFELRYIPDMETRAGF    |
| Q10901 | ATFQQVQTKYIKVRPKVVKNNDSATLAAALNNGSLDYVKASV   |
| Q10901 | IKVRPKVVKNNDSATLAAALNNGSLDYVKASVEYTSGMNVLG   |
| P56564 | CFKQFKTSYEKRSFKVPIQSNETLLGAVINNVSEAMETLTR    |
| P56564 | EKRSFKVPIQSNETLLGAVINNVSEAMETLTRIREEMVVPV    |
| P56564 | KRSFKVPIQSNETLLGAVINNVSEAMETLTRIREEMVVPVPG   |
| Q21353 | QATFQQVQTEYMPIKPSRVRNATSMNMTSEVLHKQTLTYTN    |
| Q21353 | QVQTEYMPIKPSRVRNATSMNMTSEVLHKQTLTYTNEMNVL    |
| P42892 | WGTFSNLWEHNQAI IKHLENSTASVSEAERKAQVYYRACM    |
| P42892 | STASVSEAERKAQVYYRACMNETRIEELRAKPLMELIERLG    |
| P42892 | RIEELRAKPLMELIERLGGWNI TGPWAKDNFQDTLQVVTAH   |
| P42892 | SNVIQVDQSGGLPSRDYYLNKTENEKVLTYLNYMVQLGK      |
| P42892 | DEEAI RQMQQI LDFETALANITTI PQEKRRDEELIYHKVTA |
| P42892 | LAPANWLFFLNTIFYPVEINESEPIVVYDKEYLEQISTLI     |
| P42892 | ESEPIVVYDKEYLEQISTLINTDRCLLNNYMIWNLVRKTS     |
| P42892 | VFNDYTAVPDLYFENAMRFFNFSWRVTADQLRKA PNRDQWS   |

|        |                                             |
|--------|---------------------------------------------|
| P42892 | AFDDQGREYDKDGNLRPWWKNSVVEAFKRQTECMVEQYSNY   |
| P42892 | KNSSVEAFKRQTECMVEQYSNYSVNGEPVNGRHTLGENIAD   |
| Q4PZA2 | WGTF SNLWEHNQAVIKHLLLENATASVSEAERKAQVYYRACM |
| Q4PZA2 | ATASVSEAERKAQVYYRACMNETRIEELRAKPLMELIEKLG   |
| Q4PZA2 | RIEELRAKPLMELIEKLGWNI TGPWAKDNFQDTLQVVTAH   |
| Q4PZA2 | VTAHYRTSFFFSVYVSADSKNSNSNVIQVDQSGLGLPSRDY   |
| Q4PZA2 | YRTSFFFSVYVSADSKNSNSNVIQVDQSGLGLPSRDYYLNK   |
| Q4PZA2 | SNVIQVDQSGLGLPSRDYYLNKTENEKVL TGYLNYMVQLGK  |
| Q4PZA2 | DEDAIRPQMQQILD FETALANITIPQEKRRDEELIYHKVTA  |
| Q4PZA2 | LAPAINWLPFLNTIFYPVEINESEPIVVYDKEYLRQVSTLI   |
| Q4PZA2 | ESEPIVVYDKEYLRQVSTLINNTDKCLLNMYMMWNLVRKTS   |
| Q4PZA2 | SEPIVVYDKEYLRQVSTLINNTDKCLLNMYMMWNLVRKTSS   |
| Q4PZA2 | VFNDYTAVPDLYFENAMRFFNFSWRVTADQLRKAPNRDQWS   |
| Q4PZA2 | AFDDQGREYDKDGNLRPWWKNSVVEAFKQQTECMVQQYSNY   |
| Q4PZA2 | KNSSVEAFKQQTECMVQQYSNYSVNGEPVNGRHTLGENIAD   |
| Q16610 | ELLALIQLEREFQRCCRQGNHHTCTWKAWEDTLDKYCDREY   |
| Q16610 | HLCGNQRVLTKHKH I PGLIHNMTARCCDLFFPEQACCAEEE |
| Q61508 | QLQALTRLETEFQRCCRQGHNHTCTWKAWEGTLDGYCEREL   |
| Q61508 | QLCGSGRVLSKHKQIPGLIQNMTIRCCELPYPEQACCSEEE   |
| Q61508 | INCFNTNYLRNVALVAGDTGNATGLGEQGPTRGTDANPAPG   |
| Q9BZQ6 | DALGKFSLTLDISLDTLVVLNKTKEFEDAVRKVLRDVLNDN   |
| Q9BZQ6 | YNDELLQMAKQLGYKLLPAFN TTSGLPYPRINKFGIRKPE   |
| Q9BZQ6 | IEDYIFTTEAHLPLWLSTTNQSI SKKNTTSEYTELDDSNF   |
| Q9BZQ6 | TEAHLPLWLSTTNQSI SKKNTTSEYTELDDSNFDWTCPNT   |
| Q9BZQ6 | SDKAKDRDPEMENE EQPSENDSQNQSGEQISSSSQEVDLV   |
| Q9BZQ6 | KDRDPEMENE EQPSENDSQNQSGEQISSSSQEVDLVDQES   |
| Q9BZQ6 | CTDLDNQLQE QSETEEDSNPNVSWGKQVQPIDSI LADWNED |
| O43854 | INECEVEPCKNGGICTDLVANY SCECPGEFMGRNCQYKCSG  |
| P20827 | APLLGLCCSLAAADRHTVFWNS SNPKFRNEDYTIHVQLNDY  |
| O08545 | LPLLAQGGP GALGNRHAVYWNSSNQHLRREGYTVQVNVNDY  |
| O08545 | EGYTVQVNVNDYLDIYCPHYNSSGPGGAEQYVLYMVNLSG    |
| O08545 | PHYNSSGPGGAEQYVLYMVNLSGYRTCNASQSKRWE CNR    |
| O08545 | GGGAEQYVLYMVNLSGYRTCNASQSKRWE CNRQHASHSPI   |
| O08543 | CVFSQDPGSKVADRYAVYWNSSNPRFQRGDYHIDVCINDY    |
| O08543 | AIPDNRRSCLKLVFVRPTNSCMKTIGVHDRVFDVNDKVE     |
| P52803 | CVFSQDPGSKAVADRYAVYWNSSNPRFQRGDYHIDVCINDY   |
| P52800 | LMVLCRTAISRSIVLEPTIYWNSSNSKFLPGQGLVLYPQIGD  |
| P52800 | PNLWGLEFQKNKDYIISTSNGL EGLDNQEGGVCQTRAMK    |
| O35393 | RGAASAEFGRD T I PGDPSSNATSRGAEGPLPPSPMAVAG  |
| P36368 | QEEPSAQHRLVSKSFPHPGFNMSLMLQTI PP GADF SNDLM |
| Q9GV16 | HGTNVVVKHKPYHPSVEGYDNTSFSEVDMKILQDLGLNTIR   |

|        |                                           |
|--------|-------------------------------------------|
| Q9GV16 | LNTIRLGMMLPGYVPTRGNYNETYLKIIQEIVSKAAKYGIY |
| Q9GV16 | HAWGDYFTEAAAAAFQNFYNNTDGLLDADAWDFWKTAQGF  |
| Q9GV16 | VTWDYFAAGFSKVPGGDAYRNRSVLSYHYEFPDFNKKFQF  |
| Q9GV16 | GCLTDSMHDETGHLRDIVLQNTTRTPQAVAGHTIGYKFDR  |
| P00533 | NKLTQLGTFEDHFLSLQRMFNCEVVLGNLEITYVQRNYDL  |
| P00533 | RMFNCEVVLGNLEITYVQRNYDLSFLKTIQEVAGYVLIAL  |
| P00533 | RGNMYENSYALAVLSNYDANKTGLKELPMRNLQEILHGAV  |
| P00533 | ALCNVESTIQRDIVSSDFLSNMSMDFQNHLSGCQKCDPSCP |
| P00533 | MSMDFQNHLSGCQKCDPSCPNGSCWGAGEENCQKLTKIICA |
| P00533 | PCRKVCNGIGIGEFKDSLSINATNIKHFKNCTISGDLHIL  |
| P00533 | GIGEFKDSLSINATNIKHFKNCTISGDLHILPVAFRGDSF  |
| P00533 | DILKTVKEITGFLLIQAWPENRTDLHAFENLEIIRGRTKQH |
| P00533 | EIIRGRTKQHGFSLAVVSLNITSLGLRSLKEISDGDVIIS  |
| P00533 | ALCSPEGCWGPEPRDCVSCRNVSRGRECVDKCNLEGEPRE  |
| P00533 | EFVENSECIQCHPECLPQAMNITCTGRGPDNCIQCAHYIDG |
| P00533 | AHYIDGPHCVKTCPAGVMENNTLVWKYADAGHVCHLCHPN  |
| P00533 | NNTLVWKYADAGHVCHLCHPNCTYGCTGPGLEGCPNGPKI  |
| P01133 | VSLAPQHWSCPEGTLAGNGNSTCVGPAPFLIFSHGNSIFR  |
| P01133 | NEKRIYWVDLERQLLQRVFLNGSRQERVCNIEKNVSGMAIN |
| P01133 | LLQRVFLNGSRQERVCNIEKNVSGMAINWINEEVWISNQQE |
| P01133 | EEVWISNQQEGIITVTDKGNNSHILLSALKYPANVAVDPV  |
| P01133 | PKAEDDTWEPEQKLCRKGNCSSTVCGQDLQSHLCMAEG    |
| P01133 | VGFVLLPDGKRCHQLVSCPRNVSECSHDCVLTSEGPLCFCP |
| P01133 | KSLIGRSDLNGKRSKIITKENISQPRGIAVHPMAKRLFWTD |
| P01133 | DLKNQVTPLDILSKTRVSEDNITESQHMLVAEIMVSDQDDC |
| P01133 | DGIHCLDIDECQLGEHSCGENASCNTTEGGYTCMCAGRLSE |
| Q01279 | RGNALYENTYALAILSNYGTNRTGLRELPMRNLQEILIGAV |
| Q01279 | ILCNMDTIQWRDIVQNVFMSNMSMDLQSHPSKCDPSCP    |
| Q01279 | MSMDLQSHPSKCDPSCPNGSCWGGGEENCQKLTKIICA    |
| Q01279 | PCRKVCNGIGIGEFKDTLSINATNIKHFKYCTAISGDLHIL |
| Q01279 | EILKTVKEITGFLLIQAWPDNWDLHAFENLEIIRGRTKQH  |
| Q01279 | EIIRGRTKQHGFSLAVVGLNITSLGLRSLKEISDGDVIIS  |
| Q01279 | PLCSSEGCWGPEPRDCVSCQNVSRGREVEKCNILEGEPRE  |
| Q01279 | EFVENSECIQCHPECLPQAMNITCTGRGPDNCIQCAHYIDG |
| Q01279 | AHYIDGPHCVKTCPAGIMENNTLVWKYADANNVCHLCHAN  |
| Q01279 | NNTLVWKYADANNVCHLCHANCTYGCAGPGLQGCEVWPSGP |
| P17813 | FLEFPTGPSQLELTLQASKQNGTWPREVLLVLSVNSVFLH  |
| P17813 | LQASKQNGTWPREVLLVLSVNSVFLHLQALGIPLHLAYNS  |
| P17813 | VNSSVFLHLQALGIPLHLAYNSLVTFQEPGVTTELPSF    |
| P17813 | IPLHLAYNSLVTFQEPGVTTELPSFQILEWAAERG       |
| P17813 | IRGFKLPDTPQGLLGEARMLNASIVASFVELPLASIVSLHA |



|        |                                            |
|--------|--------------------------------------------|
| P08246 | AAHCVANVNVRAVRVVLGAHNLSRREPTRQVFQVQRI FENG |
| P08246 | IFENGYDPVNLNDIVILQLNGSATINANVQVAQLPAQGRR   |
| P08246 | AMGWGLLGRNRGIASVLQELNVTVVTSICRRSNVCTLVGRGR |
| Q6PCB8 | GSAPDSPFTSPLREEIMANNFSLESHNISLTHESSMPVEK   |
| Q6PCB8 | FTSPPLREEIMANNFSLESHNISLTHESSMPVEKNITLERP  |
| Q6PCB8 | FSLESHNISLTHESSMPVEKNITLERPSNVNLTQCFTTSGD  |
| Q6PCB8 | TEHSSMPVEKNITLERPSNVNLTQCFTTSGDLNAVNVTWKK  |
| Q6PCB8 | RPSNVNLTQCFTTSGDLNAVNVTWKKDGEQLENNYLVSATG  |
| Q6PCB8 | ISYVGDSTVLTCKCQNCFLNWTWYSSNGSVKVPVGVQMNK   |
| Q6PCB8 | TVLTCKCQNCFLNWTWYSSNGSVKVPVGVQMNKVINGTY    |
| Q6PCB8 | YSSNGSVKVPVGVQMNKVINGTYANETKLKITQLEEDGE    |
| Q6PCB8 | SVKVPVGVQMNKVINGTYANETKLKITQLEEDGESYWCR    |
| P21995 | PTDPTFTSLPVREEMMAKYSNLSLKSCNISVTEKSNVSVEE  |
| P21995 | SLPVREEMMAKYSNLSLKSCNISVTEKSNVSVEEENVILEKP |
| P21995 | MAKYSNLSLKSCNISVTEKSNVSVEEENVILEKPSHVELKCV |
| P21995 | LSLKSCNISVTEKSNVSVEEENVILEKPSHVELKCVYTATKD |
| P21995 | ILEKPSHVELKCVYTATKDLNLMNVTWKKDDEPLETTGDFN  |
| P21995 | KPSHVELKCVYTATKDLNLMNVTWKKDDEPLETTGDFNTTK  |
| P21995 | NLMNVTWKKDDEPLETTGDFNTTKMGNTLTSQYRFIVFNSK  |
| P21995 | IAYVGDSTVLKVCQDCLFLNWTWYMGNETAQVPIDAHSNE   |
| P21995 | TVLKVCQDCLFLNWTWYMGNETAQVPIDAHSNEKYIINGS   |
| P21995 | LNWTWYMGNETAQVPIDAHSNEKYIINGSHANETRLKIKHL  |
| P21995 | MGNETAQVPIDAHSNEKYIINGSHANETRLKIKHLLLEDGG  |
| P21995 | AQVPIDAHSNEKYIINGSHANETRLKIKHLLLEDGGSYWCR  |
| Q5UCC4 | VTHPGGCRGHEVEDVLELFNVSQVLPPTTAPGPETAAFI    |
| Q8C7X2 | ENLIPYSPDVQVHAERFINYNQTVSRMRGIYTAPSGLESTC  |
| Q8N766 | ENLIPYSPDVQVHAERFINYNQTVSRMRGIYTAPSGLESTC  |
| Q9Y6C2 | APALGPASSTPRPLAQPARPNLSGSSAGSPLSGLGGEGPGE  |
| Q9Y6C2 | GHPPGYTSLASRLSRLEDRFNSTLGPSEEQEESWPGAPGGL  |
| Q9Y6C2 | LSHWLPAARGRLEQLGGLLANVSGELGGRLDLLEEQVAGAM  |
| Q9Y6C2 | RLQDRVDAQDETAAEFTLRLNLTAARLQGLELLQAHGDEG   |
| Q9Y6C2 | SALQALQGEELSEVILSFSSLNDLSELQTTVEGQADLADL   |
| Q9Y6C2 | GLREGLSRHVAGLWAGLRETNNTSQMQAALLEKLVGGQAGL  |
| Q9Y6C2 | ALLEKLVGGQAGLGRRLGALNSLQLEDRHLQSLKDLTG     |
| Q9BXX0 | GYPARPSARNKNWCAYIVNKNVSCSVLEGSESFIAQYNCA   |
| Q9BXX0 | KESGMKDIKSELAEVKDTLKNKSDKLEELDGVKGYEGQLR   |
| Q9BXX0 | IVPEPDVDFDAKWNELDARINVTEKNAEEHCFYIETLRGA   |
| Q9BXX0 | VDQKIQSLEDRLGSLVLLQMTNNTGAELSPPGAAALPGVSGS |
| Q9BXX0 | ALPNREDRAVRDSLHLLKSLNDTMHRKFOETEQTIQKLQQD  |
| Q9BXX0 | ETEQTIQKLQQDFSLYSLNHTENDVTHLQKEMSNCRAGE    |
| Q9BXX0 | RIKEGLNKHVSSLWNCVROMNGTLRSHSRDISGLKNSVQQF  |

|        |                                            |
|--------|--------------------------------------------|
| Q9BXX0 | ITATLTPERDAYVEAVLSVSNASVAQLHTAGYRREFLEYHR  |
| P47801 | TAIMLFVSTIANVWMVADYANASVGLWKNCTGGNCDGSLSY  |
| P47801 | TIANVWMVADYANASVGLWKNCTGGNCDGSLSYGNEDA IKA |
| P47801 | CILVGSITYTHHYAHSEGNFNSSSHQGYCFILTWICFCFSF  |
| O97939 | EKPKEKDPKTEPATEPSVNTTVPETNSTQPNAFNPRGND    |
| O97939 | PKTEPATEPSVNTTVPETNSTQPNAFNPRGNDTSPGTGS    |
| O97939 | VNTTVPETNSTQPNAFNPRGNDTSPGTSGQGNPRSNPTG    |
| O97939 | TSGQGNPRSNPTGQNGPAVNVSGQGVPRSQSPWGRQTI I   |
| O97939 | TVVPTRDPSGPWRNSQDYGINKSNYKLPQPEDNMLVPNFNS  |
| O97939 | SHIKYARQTVSPTSIVPGQRNSSEKILPGESQNPSPFKDDV  |
| O97939 | VFGTDPKEPRPEGI PNEMQGNESERQQQRQSSILQLPCFGS |
| Q21109 | AKNGEISGMHNWVRFVYLENNRTENFDYKGFVKRFNIMAA   |
| P08110 | SRTDDEVVQREEEAIQLDGLNASQIKEIREKSEKFAFQAEV  |
| P08110 | KLIINSLYKNKEIFLRELISNASDALDKIRLISLTDENALA  |
| P08110 | VGFYSAFLVADRVIIVTSKHNNDTQHIWESDSNEFSVIDDPR |
| P08110 | MMPKYLNFVKGVVDSDDLPLNVSRETQQHKLLKVIKRLV    |
| P08110 | RKKLVRKTLDMIKKAEEKYNDTFWKEFGTNVKLGVIEDHS   |
| P08110 | DTFWKEFGTNVKLGVIEDHSNRTRLAKLLRFQSSHESNLT   |
| P14625 | SRTDDEVVQREEEAIQLDGLNASQIRELREKSEKFAFQAEV  |
| P14625 | KLIINSLYKNKEIFLRELISNASDALDKIRLISLTDENALS  |
| P14625 | VGFYSAFLVADKVIIVTSKHNNDTQHIWESDSNEFSVIADPR |
| P14625 | MMPKYLNFVKGVVDSDDLPLNVSRETQQHKLLKVIKRLV    |
| P14625 | RKKLVRKTLDMIKKIADKYNDTFWKEFGTNIKLGVIEDHS   |
| P14625 | DTFWKEFGTNIKLGVIEDHSNRTRLAKLLRFQSSHPTDIT   |
| P08113 | SRTDDEVVQREEEAIQLDGLNASQIRELREKSEKFAFQAEV  |
| P08113 | KLIINSLYKNKEIFLRELISNASDALDKIRLISLTDENALA  |
| P08113 | VGFYSAFLVADKVIIVTSKHNNDTQHIWESDSNEFSVIADPR |
| P08113 | MMPKYLNFVKGVVDSDDLPLNVSRETQQHKLLKVIKRLV    |
| P08113 | RKKLVRKTLDMIKKADEKYNDTFWKEFGTNIKLGVIEDHS   |
| P08113 | DTFWKEFGTNIKLGVIEDHSNRTRLAKLLRFQSSHSTDIT   |
| P90754 | VYKRRTGKKANCLFWVGCAYNNSGYAPDVAPAYNQELPFRN  |
| P90754 | DYLDLGLITAKGVVGRVYINDTTISVNDVVDKFRCKIDTV   |
| P90754 | DYFNPKMHTIFYARGPSFKQNTTISPYQNIQYMNLMNLLG   |
| P90754 | NIQYMNLMNLLGIEGAVETNGTIGFFDNILTNP PRRDNPT  |
| P90754 | TNVIGECPMIAFPSVLKCSGNVSAETLNQLSVKLTNCAFSP  |
| P90754 | NDARRAIEVLSRDEASNPNFTFLNAKYQSNCPSHIPTGS    |
| P90754 | KMYVISGTATDINHDIADSNNGSVITHIYRIMLICNSTWLL  |
| P90754 | GIADSNNGSVITHIYRIMLICNSTWLLMNPPLCTDSDSMDTL |
| P22413 | LTRSLCACSDDCCKDKGDCCINYSSVCQGEKSWVEEPCESIN |
| P22413 | TGLYPESHGIDNKMYDPKMNASFSLKSKEKFNPEWYKGEF   |
| P22413 | FWPGSDVEINGIFPDIYKMYNGSVPFEEERILAVLQWLQLPK |

|        |                                             |
|--------|---------------------------------------------|
| P22413 | LRPSDVPDKYYSFNIEGIARNLSCREPNQHFKPYLKHFLPK   |
| P22413 | ENIEVYNLMCDLLNLTAPANNNGTHGSLNHLKPNVYTPKHP   |
| P22413 | NLGCSCNPSILPIEDFQTQFNLTVAEEKI IKHETLPYGRPR  |
| P22413 | MSGYSQDILMPLWTSYTVDRNDSFSTEDFSNCLYQDFRIPL   |
| P22413 | CLYQDFRIPLSPVHKCSFYKNNTKVSYGFLSPQLNKNSSG    |
| P22413 | FYKNNTKVSYGFLSPQLNKNSSGIYSEALLTTNIVPMYQS    |
| P06802 | LSRFVCSADDCKTHNDCCINYSSVCQDKKSWVEETCESID    |
| P06802 | TGLYPESHGIDNKMYPKMNASFSLKSKEKFNPLWYKQP      |
| P06802 | FWPGSDVEIDGILPDIYKVYNGSVPFEEERILAVLEWLQLPS  |
| P06802 | LRPTDVPETYYSFNIEALAKNLSCREPNQHFRPYLKPFLPK   |
| P06802 | ENIEVYNLMCDLLGLIPAPANNNGSHGSLNHLKPKIYNPSHP  |
| P06802 | DLGCTCDPWIVPIKDFEKQLNLTTEVDVDDIYHMTVPYGRPR  |
| Q9R1E6 | IKRAEWDEGPPTVLSDSPTWNTSGSCKGRCFELQEVGPPDC   |
| Q9R1E6 | GRIRKIPNNLKYDPKAI IANLTCKKPDQHFYPYMKQHLPK   |
| Q9R1E6 | ENIELYNVMCDLLGLKPAFNNNGTHGSLNHLRLTNTFRPTLP  |
| Q9R1E6 | GPLSVSSFILPHRPDNDESCNSSEDESKWVEELMKMHTARV   |
| Q64610 | IKRAEWDEGPPTVLSDSPTWNTSGSCKGRCFELQEVGPPDC   |
| Q64610 | NVDDITLVPGTLGRIRAKSINNSKYDPKTI IANLTCKKPDQ  |
| Q64610 | GRIRAKSINNSKYDPKTI IANLTCKKPDQHFYPYMKQHLPK  |
| Q64610 | ENIELYNVMCDLLGLKPAFNNNGTHGSLNHLRLTNTFRPTMP  |
| Q64610 | STEAETGKFRGSKHENKKNLNGSVPRKERHLLYGRPAVLY    |
| Q64610 | GPLSVSSFILPHRPDNDESCNSSEDESKWVEELMKMHTARV   |
| Q6DYE8 | LYPESHGIDNMMYDVHLNKNFSLSSVEKSNPAWWSGQPIW    |
| Q6DYE8 | AMYQGLKAACYWPGSDVAVNGSFPTIYRNYSNSVPYERRI    |
| Q6DYE8 | CYYWPGSDVAVNGSFPTIYRNYSNSVPYERRITTLQWLDL    |
| Q6DYE8 | IRTRNIPQDFFTFNSEEIVRNLSCKRKPQHFYPYLTPLPK    |
| Q6DYE8 | ENIEVYNLLCDLLHIEPAPANNNGTHGSLNHLKTPFYKPSHA  |
| Q6DYE8 | CSCPALQNTPGLEEQANQRLNLSEGEVAATVKANLPFGRPR   |
| Q6DYE8 | ADV RVAPSESQKCSFYLADKNI THGFLYPAIKGTNESRYDA |
| Q6DYE8 | FYLADKNI THGFLYPAIKGTNESRYDALITSNLVPYKFEK   |
| Q6DYE8 | LDVLPFIVPHRPTNIESCENKTEDLWVEERFQAHAARVRD    |
| Q9Y6X5 | MWPGTDVPIHDTISSYFMNYSNSVSFEERLNNITMMLNNSN   |
| Q9Y6X5 | TISSYFMNYSNSVSFEERLNNITMMLNNSNPPVTFATLYWE   |
| Q9Y6X5 | DHSYVTLIDLSPVAAI LPKINRTEVYNKLNKCSPHMNVYLK  |
| Q9Y6X5 | NIVDIYPMCHILGLKPHPNNGTFGHTRKCLLDQWCINLPE    |
| Q8BTJ4 | LQENRSSAAAMWPGTDVPIHNI TASYFMNYSNSVSFKERLG  |
| Q8BTJ4 | ITASYFMNYSNSVSFKERLGNVTTWLSSSNPPVTFATLYWE   |
| Q8BTJ4 | DRSNYSVIDLTPVAAI LPKINVTEVYDKLKRCNPHMNVYLK  |
| Q8BTJ4 | HSSRIQPI ILVAEEGWTTITLNKSSFKLGDHGYDNSLPSMHP |
| Q8BTJ4 | NTVDIYPMCHILGLKPHPNNGTLSHTRKCLLDQWCINLPE    |
| F1N5C8 | TGRHCEVHQMTGNMWDPTNKSFDLGINRDSRLPLWWNGS     |

|        |                                             |
|--------|---------------------------------------------|
| F1N5C8 | DTNKSFDLGINRDSRLPLWNGSEPLWVTLTKAKRKVYMY     |
| F1N5C8 | LVADEGWFITENRESLPFWMNSTVTRKPEGWQWGHYDNE     |
| F1N5C8 | RVVDIYNLMCKVTGVTPLFNNGSWSRVMCMKDPASSAFGA    |
| Q6UWV6 | FTLVGTGKYIENHGVVHNMYNNTTSKVKLPHYATLGIQRWWD  |
| Q6UWV6 | TTSKVKLPHYATLGIQRWWDNGSVPIWITAQRQGLRAGSFF   |
| Q6UWV6 | IWITAQRQGLRAGSFFYPGGNVTYQGVAVTRSRKEGIAHNY   |
| Q6UWV6 | TYQGVAVTRSRKEGIAHNYKNETEWRANIDTVMAWFTEEDL   |
| Q6UWV6 | HGMTTVDKRAGDLVEFHKFPNFTFRDIEFELLDYGPNGMLL   |
| P49961 | LDAGSSHTSLYIYKWPAEKENDTGVVHQVEBCRVKGPISK    |
| P49961 | ETFGALDLGGASTQVTFVPQNQTIESPDNALQFRLYGKDYN   |
| P49961 | VASNEILRDPCHFPGYKVVVNSDLYKTCTKRFEMTLPFQ     |
| P49961 | FEIQGIGNYQQCHQSILELFNTSYCPYSQCAFNGIFLPPLO   |
| P49961 | PPLQGDGAFSAFYFVMKFLNLTSEKVSQEKVTEMMKKFCA    |
| P49961 | IHFIGKIQGS DAGWTLGYMLNLTNMI PAEQPLSTPLSHSTY |
| Q9Y5L3 | LDAGSSHTSMFYKWPADKENDTGIVGQHSSCDVPGGGISS    |
| Q9Y5L3 | KERHAGTPLYLGATAGMRLNLTNPEASTSVLMAVTHTLTQ    |
| Q9Y5L3 | VLLGDVYQSPCTMAQRPNFNSSARVSLSGSSDPHLCRDLV    |
| Q9Y5L3 | SMGLPVATLQLEAAAVNVCNQTWAQLQARVPGQARLADY     |
| Q9Y5L3 | VIFQKKAADTAVGWALGYMLNLTNLI PADPPGLRKGTFSS   |
| O55026 | LDAGSSHTSMFVYKWPADKENDTGIVGQHSSCDVPGGGISS   |
| O55026 | KDRYASTPLYLGATAGMRLNLTNPEATAKVLEAVTQTLTR    |
| O55026 | VLLREVYQSPCTMGQRPNFNSSATVSLSGTSNAALCRDLV    |
| O55026 | VSLSGTSNAALCRDLVSGLFNISSCPFSQCSFNGVFQPPVA   |
| O55026 | VMGLPVGTLKQLEDATETTCNQTWAEQARVPGQTRLDPDY    |
| O55026 | VVFEKKAADTAVGWALGYMLNLTNLI PADLPGLRKGTFSS   |
| O75354 | VKKVFKASFFLVGDDCVS IMNGTDEGVSAWIT INFLTGLSK |
| O75354 | RVEGTLQASPPGYLTALRMFNRTYKLYSYSYLGGLMSARL    |
| O75356 | QFEKTLEQTPRGYLTSEMFNSTYKLYTHSYLGFGLKAARL    |
| O75356 | GILKVEDFERKAREVCDNLENFTSGSPFLCMDLSYITALLK   |
| P14351 | TISRQWKNKDIQVLGPVIDWNVTQRAVYQPLQTRRIARSLR   |
| P14351 | TRRIARSLRMQHPVKYVEVNMTS IPQGVYYPHPEPIVVK    |
| P14351 | RVLGLSQILMINSENIANNANLTQEVEKLLTEMVNEEMQSL   |
| P14351 | TYNRQS IWDYIYKVESIRPANWTTKSKYQARLGSFYIPSS   |
| P14351 | SKYGQARLGSFYIPSSLRQINVSHVLFCSQDLYSKWYNIEN   |
| P14351 | WYNIENTIEQNERFLNKLNLNLTSGT SVLKKRALPKDWSSQ  |
| P14351 | LFREINVLIDICSPESVILLNNTSYYSFSLWEGDCNFTKDMI  |
| P14351 | ESVILLNNTSYYSFSLWEGDCNFTKDMISQLVPECDGFYNNS  |
| P14351 | DCNFTKDMISQLVPECDGFYNNSKWMHMPYACRFWRSSKN    |
| P14351 | KIASKAYGIDTVLFLSKNFLNYTGTVPVNEMPNAFAVGLID   |
| P14351 | MPNARAFVGLIDPKFPPSYPNVTRHYTSCNNRKRSSVDNN    |
| P14351 | DCTRQDYVICDVVKIVQPCGNSSDTSDCPVWAEAVKEPFVQ   |

|        |                                              |
|--------|----------------------------------------------|
| P14351 | DCPVWAEAVKEPFVQVNP LKNGSYLV LASSTDCQIPPVVPS  |
| P14351 | VLASSTDCQIPPVVPSIVTVNETTSCFGLDFKRPLVAEERL    |
| C1JJY3 | EPAYRNVEKTNSPDYSLAYSNTTVEKSLVDGTTVNTTGVSM    |
| P03375 | VWATHACVPTDFNPQEVVLVNV TENFNMMWKNDMVEQM HEDI |
| P03375 | LKPCVKLTPLCVSLKCTDLKNDTNTNSSSGRMIMEKGEIKN    |
| P03375 | KLTPLCVSLKCTDLKNDTNTNSSSGRMIMEKGEIKNCSFNI    |
| P03375 | NDTNTNSSSGRMIMEKGEIKNCSFNISTSIRGKVQKEYAFF    |
| P03375 | TNSSSGRMIMEKGEIKNCSFNISTSIRGKVQKEYAFFYKLD    |
| P03375 | RGKVQKEYAFFYKLDIIPIDNDTTSYTLTSCNTSVITQACP    |
| P03375 | YKLDIIPIDNDTTSYTLTSCNTSVITQACP KVSFEPIPIHY   |
| P03375 | FEPIPIHYCAPAGFAILKCNKTFNGTG PCTNVSTVQCTHG    |
| P03375 | PIHYCAPAGFAILKCNKTFNGTG PCTNVSTVQCTHGIRPV    |
| P03375 | AGFAILKCNKTFNGTG PCTNVSTVQCTHGIRPVVSTQ LLL   |
| P03375 | VSTVQCTHGIRPVVSTQ LLLNGSLAE EEVVIRSANFTDNAK  |
| P03375 | STQ LLLNGSLAE EEVVIRSANFTDNAKTIIVQLNQSV EINC |
| P03375 | EVVIRSANFTDNAKTIIVQLNQSV EINCTRPNNNTRKSIRI   |
| P03375 | ANFTDNAKTIIVQLNQSV EINCTRPNNNTRKSIRIQRG PGR  |
| P03375 | AKTIIVQLNQSV EINCTRPNNNTRKSIRIQRG PGRAVFTIG  |
| P03375 | GPGRAVFTIGKIGNMRQAHCNISRAKWNNTLKQIDSKLREQ    |
| P03375 | TIGKIGNMRQAHCNISRAKWNNTLKQIDSKLREQFGNNKTI    |
| P03375 | AKWNNTLKQIDSKLREQFGNNKTIIFKQSSGGDPEIVTHSF    |
| P03375 | GGDPEIVTHSFNCGGEFFYCNSTQLFNSTWFNSTWSTKGSN    |
| P03375 | VTHSFNCGGEFFYCNSTQLFNSTWFNSTWSTKGSNNT EGS    |
| P03375 | NCGGEFFYCNSTQLFNSTWFNSTWSTKGSNNT EGSDTITLP   |
| P03375 | NSTQLFNSTWFNSTWSTKGSNNT EGSDTITLPCR IKQIINM  |
| P03375 | QEVGRAMYAPPISGQIRCSSNITG LLLTRDGGNSNNESEIF   |
| P03375 | IRCSSNITG LLLTRDGGNSNNESEIFRPGGDMRDNRSEL     |
| P03375 | QLLGIWGC SGKLICTTAVPWNASWSNKSLEQIWNNTWMEW    |
| P03375 | WGCSGKLICTTAVPWNASWSNKSLEQIWNNTWMEWDREIN     |
| P03375 | TTAVPWNASWSNKSLEQIWNNTWMEWDREINNYTSLIHSL     |
| P03375 | KSLEQIWNNTWMEWDREINNYTSLIHSLIEESQNQ QEKNE    |
| P03375 | EKNEQELLELDKWA SLWNWFNITNWLWYIKL FIMIVGGLVG  |
| P04578 | VWATHACVPTDFNPQEVVLVNV TENFNMMWKNDMVEQM HEDI |
| P04578 | LKPCVKLTPLCVSLKCTDLKNDTNTNSSSGRMIMEKGEIKN    |
| P04578 | KLTPLCVSLKCTDLKNDTNTNSSSGRMIMEKGEIKNCSFNI    |
| P04578 | NDTNTNSSSGRMIMEKGEIKNCSFNISTSIRGKVQKEYAFF    |
| P04578 | TNSSSGRMIMEKGEIKNCSFNISTSIRGKVQKEYAFFYKLD    |
| P04578 | RGKVQKEYAFFYKLDIIPIDNDTTSYKLTSCNTSVITQACP    |
| P04578 | YKLDIIPIDNDTTSYKLTSCNTSVITQACP KVSFEPIPIHY   |
| P04578 | FEPIPIHYCAPAGFAILKCNKTFNGTG PCTNVSTVQCTHG    |
| P04578 | PIHYCAPAGFAILKCNKTFNGTG PCTNVSTVQCTHGIRPV    |

|        |                                            |
|--------|--------------------------------------------|
| P04578 | AGFAILKCNKTFNGTGPCNTNVSTVQCTHGIRPVVSTQLLL  |
| P04578 | VSTVQCTHGIRPVVSTQLLNGLSLAEVEVIRSVNFTDNAK   |
| P04578 | STQLLNGLSLAEVEVIRSVNFTDNAKTIIVQLNTSVEINC   |
| P04578 | EVVIRSVNFTDNAKTIIVQLNTSVEINCTRPNNNTRKRIRI  |
| P04578 | VNFTDNAKTIIVQLNTSVEINCTRPNNNTRKRIRIQRGPGR  |
| P04578 | AKTIIVQLNTSVEINCTRPNNNTRKRIRIQRGPGRAVFTIG  |
| P04578 | GPGRAVFTIGKIGNMRQAHCNISRAKWNNLTKQIASKLREQ  |
| P04578 | TIGKIGNMRQAHCNISRAKWNNLTKQIASKLREQFGNNKTI  |
| P04578 | AKWNNLTKQIASKLREQFGNNKTIIFKQSSGGDPEIVTHSF  |
| P04578 | GGDPEIVTHSFNCGGEFFYCNSTQLFNSTWFNSTWSTEGSN  |
| P04578 | VTHSFNCGGEFFYCNSTQLFNSTWFNSTWSTEGSNTEGSD   |
| P04578 | NCGGEFFYCNSTQLFNSTWFNSTWSTEGSNTEGSDTITLP   |
| P04578 | NSTQLFNSTWFNSTWSTEGSNTEGSDTITLPCRKQIINM    |
| P04578 | QKVGKAMYAPPISGQIRCSSNITGLLLTRDGGNSNNESEIF  |
| P04578 | IRCSSNITGLLLTRDGGNSNNESEIFRPGGGDMRDNRSEL   |
| P04578 | QLLGIWGC SGKLICTTAVPWNASWSNKSLEQIWNHTTWMEW |
| P04578 | WGCSGKLICTTAVPWNASWSNKSLEQIWNHTTWMEWDREIN  |
| P04578 | CTTAVPWNASWSNKSLEQIWNHTTWMEWDREINNYTSLIHS  |
| P04578 | KSLEQIWNHTTWMEWDREINNYTSLIHSLEESQNQEKNE    |
| P04578 | EKNEQELLELDKASLWNWFNITNWLWYIKLFIWVGGVLG    |
| P03390 | FLSLKGARSAAPGSSPHQVYNITWEVTNGDRETVAISGNH   |
| P03390 | TTGRVYWKPSSSWDYITVDNNLTTSQAVQVCKDNKWCNPLA  |
| P03390 | PPAGTGDRLLNLVQAYQALNLTNPKTQECWLCLVSGPPY    |
| P03390 | LCLVSGPPYEGVAVLGTYSNHTSAPANCSVASQHKLTLSE   |
| P03390 | PYYEGVAVLGTYSNHTSAPANCSVASQHKLTLSEVTGRGLC  |
| P03390 | EVTGRGLCIGTVPKTHQALCNTTLKIDKGSYYLVAPTGTW   |
| P03390 | TGTTWACNTGLTPCLSATVLNRTTDYCVLVELWPRVTYHPP  |
| P03395 | TTGRAYWKPSSSWDYITVDNNLTTNQAVQVCKDNKWCNPLA  |
| P03395 | QLSFPLPNPLPKPAKSPVNSPTMISPSPTPTQPPAGT      |
| P03395 | PPAGTGDRLLNLVQAYQALNLTNPKTQECWLCLVSGPPY    |
| P03395 | LCLVSGPPYEGVAVLGTYSNHTSAPTNCVASQHKLTLSE    |
| P03395 | PYYEGVAVLGTYSNHTSAPTNCVASQHKLTLSEVTGRGLC   |
| P03395 | EVTGRGLCIGTVPKTHQALCNTTLKIDKGSYYLVAPTGTW   |
| P03395 | AGTTWACNTGLTPCLSATVLNRTTDYCVLVELWPRVTYHPP  |
| Q39688 | LTILFFIQRIDFCHTLV PANETFKFVNEGELGQYISEYFG  |
| Q39688 | RTESLMRWWEANRGNPVDENATLTFGPDGNLVLARSNGV    |
| Q39688 | TTSPKPIRYYSFSLFTKLNKNESLQNVTFEFENENDQGFAF  |
| Q39688 | PIRYYSFSLFTKLNKNESLQNVTFEFENENDQGFAFLLSLK  |
| Q39688 | LKYGTSNSLGGASILNRIKYNTLSFLRLEIDGNVKIYTYN   |
| P16422 | QNTVICSKLAACKLVMKAEMNGSKLGRRAKPEGALQNNNDGL |
| P16422 | NDGLYDPCDESGLFKAKQCNGTSMCWCVNTAGVRRTDKDT   |

|        |                                            |
|--------|--------------------------------------------|
| P16422 | PKFITSILYENNVITIDLQVNSQKTQNDVDIADVAYFEK    |
| Q9UNN8 | RLHMLQISYFRDPYHVWYQGNASLGGHLTHVLEGPDTNTTI  |
| Q9UNN8 | YQGNASLGGHLTHVLEGPDTNTTI IQLQFLQEPESWARTQS |
| Q9UNN8 | LGCELPPEGSRAHVFEVAVNGSSFVSFRPERALWQADTV    |
| Q9UNN8 | ADTQVTSQVVTFTLQQLNAYNRTRYELREFLEDTCVQYVQK  |
| Q9UM22 | TKQCSKMTLTQFWDPLDI PQNSTFEDQYSIGGPQEQITVQE |
| Q9UM22 | TWIGIYTVKDCYPVQETFTINYSVILSTRFFDIQLGKIDPS  |
| P29317 | EPPHGLTRTSVTVSDLEPHMNYTTFVEARNGVSGLVTSRSF  |
| P29317 | RNGVSGLVTSRSFRITASVSIQTEPPKVRLEGRSTTSLSVS  |
| Q03145 | EPPHALTRTSVTVSDLEPHMNYTFAVEARNGVSGLVTSRSF  |
| Q03145 | RNGVSGLVTSRSFRITASVSIQTEPPKVRLEDRSTTSLSVT  |
| P54763 | GEWLVPIGRCMCKAGFEAVENGTVCRCGCPSTFKANQGDEA  |
| P54763 | PLDMPCTTIPSAPQAVISSVNETSLMLEWTPPRDSSGGREDL |
| P54763 | IQAVNGVTDQSPFSPQFASVNI TTNQAAPSAVSIHQVSR   |
| P54763 | PNGVILDYELQYYEKELSEYNATAIKSPTNTVTVQGLKAGA  |
| P54761 | ACMALLSLHLFYKCKSWLITNLTYFPETVPRELVVPVAGSC  |
| P54761 | PRSSPCTTTPSAPRSVVHHLNGSTLRLEWSAPLES GGREDL |
| P54761 | VAALNGVSTLATGPPPFEPVNVTTDREVPPAVSDIRVTRSS  |
| Q21313 | CGHCNAGNENSHPAANMVDGNNSWWMS PPLSRGLQHNEVNI |
| Q21313 | GNNWWMS PPLSRGLQHNEVNI TIDLEQEFHVAYVWIQMAN |
| Q21313 | IRILEHRPSSRQFATSEALQNFTRATNVRLRL LGTRTLQGH |
| Q21313 | CERCCPGFVQKQWQAATAHNNFTCEACNCFGRSNECEYDAE  |
| Q21313 | DQCASGYDAPKCKPCECNVNGTIGDVCLPEDGQCPCKAGF   |
| Q21313 | CPCKAGFGGTFCETCADGYTNVTAGCVCVCDATGSEHGNC   |
| Q21313 | TNVTAGCVCVCDATGSEHGNC SASTGQCECKPAYAGLSCD  |
| Q21313 | GAGITSPCEDATSGQPCNGNFTGRTCDKCAAGFYNYPCR    |
| Q21313 | TFWDLQYHHEDGCRSCDCNVNGTISGLNTCDLKTQCCKK    |
| Q21313 | YEGTVLRQAPQPCLSHSTKNTTCVDLIYPIIPSVSRQFVD   |
| Q21313 | ERPEVIQFYMDKYTATFYHNSSQKGPYIDSITAVPYNSY    |
| Q21313 | VPRGGRKSMNADADVRLTGANMTIEYWASEQFTNPEEQFTV  |
| Q21313 | TAEGKVTREELMKVLHSLQNI TLKASYFDHPKTSTLYEFG  |
| Q21313 | DCEHNTNGDHCFECNEGHYGNATNGSPYDCMACCPFAFTN   |
| Q21313 | FGHPQISGESCSPCQCNNGNNTDSRSCHPNSGDCYLCEQN   |
| Q21313 | DGRHCESCAAWFYGDAVTAKNCSSCECSQCGSQYCDNKSGG  |
| Q21313 | VTAKNCSSCECSQCGSQYCDNKSGGCECKINVEGDSCDRCK  |
| Q21313 | LIGDVDNLELEIDVLGTAIANISSATIVGARLARNKKEFND  |
| Q21313 | LNDEENSFGNVFGDAQDILTNSTQIQNKLVRTKTHSQNSVS  |
| Q21313 | IQNKLVRTKTHSQNSVSSAKNITLNGTEFLQEVMKRAQRAR  |
| Q21313 | LVRTKTHSQNSVSSAKNITLNGTEFLQEVMKRAQRARQSVR  |
| Q21313 | DLERVEAAKGEFQKLNVAIGNITENLKD KREEMTHAVTTLN |
| Q21313 | NITENLKD KREEMTHAVTTLNETRNDVAEAEAAKRVRRD   |

|        |                                            |
|--------|--------------------------------------------|
| Q21313 | TFDNNKDNTDQAVEAANAFSNLTDTLKNAKAQIDNAYEALS  |
| Q21313 | TLSPNSVETAETKSSVAGGNKSVLNLNQIISRLFVGGVPT   |
| Q21313 | PLHSVRTVSFLSDRTTASFNNATEFSEDVSVTFKFKTRSIR  |
| Q21313 | FANSEIKEISLNGCSLSDDENISTTTTAAKPTDDSDVAVL   |
| Q21313 | MKNGILFSVGVLEYITVEFVNGSIKTTVESGSGGEELWHP   |
| P14753 | QRLEDLVCFWEEAASSGMDFNYSFSYQLEGESRKSCSLHQA  |
| P01588 | RLICDSRVLERYLLEAKEAENITGCAEHCSLNENITVPDT   |
| P01588 | EAKEAENITGCAEHCSLNENITVPDTKVNIFYAWKRMEVGQ  |
| P01588 | VWQGLALLSEAVLRGQALLVNSSQPWEPLQLHVDKAVSGLR  |
| P79119 | LHLQNNNIMEMHEDTFCNVKNLTYIRKALEDIRLDGNPINL  |
| Q9NZ08 | NKIRLPEYVIVPHYDLIHANLTLTFWGTTKVEITASQPT    |
| Q9NZ08 | LAPELLVGLPYTVVIHYAGNLSETFHGFYKSTYRTKEGEL   |
| Q9NZ08 | LKVGDYFFGKCFDAMEVDALNSSHPVSTPVENPAQIREMFD  |
| Q9NZ08 | YQPCVQRAEGYFRKWKESNGNLSLPVDVTLAVFAVGAQSTE  |
| Q9NZ08 | QFSTRTRLEEVKGFSSLKENGSQLRCVQQTITETIEENIGW  |
| Q6P179 | QELRLPSVVIPLHYDLFVHPNLTSLDFVASEKIEVLVSNT   |
| Q6P179 | VLVSNTQFIIHLSKDLEITNATLQSEEDSRMYKPGKELKV   |
| Q6P179 | WWNDIWLKEGFAKYMELIAVNATYPELQFDDYFLNVCFEVI  |
| Q6P179 | YYIVHYEGHGDQLITQLNQNHLLRPKDRVGLIHDVFLV     |
| P04626 | HLYQGCQVVQGNLELTYLFTNASLSFLQDIQEVQGYVLI AH |
| P04626 | GTQLFEDNYALAVLDNGDPLNNTTPTVGASPGGLRELQLRS  |
| P04626 | ILWKDIFHKNNQLALTLIDTNRSRACHPCSPMCKGSRCWGE  |
| P04626 | QCAAGCTGPKHSDCLACLHFNHSGICELHCPALVYNTDTF   |
| P04626 | ACHQLCARGHCWGPPTQCVNCSQFLRGQECVEECRVLQGL   |
| P04626 | PREYVNRHCLPCHPECPQNGSVTCFGPEADQCVACAHYK    |
| P04626 | SYMPIWKFPDEEGACQPCPINCTHSCVDLDDKGCPAEQRAS  |
| P06494 | HLYQGCQVVQGNLELTYVFNANASLSFLQDIQEVQGYMLIAH |
| P06494 | VLWKDVFRRKNNQLAPVDIDTNRSRACPPCAPACKDNHCWGE |
| P06494 | QCAAGCTGPKHSDCLACLHFNHSGICELHCPALVYNTDTF   |
| P06494 | VCNSLCAHGHGWGPPTQCVNCSHFLRGQECVEECRVWKGL   |
| P06494 | PREYVSDRCLPCHPECPQNSSETCFGSEADQCAACAHYK    |
| P06494 | SYMPIWKYPDEEGICQPCPINCTHSCVDLDERGCPAEQRAS  |
| P21860 | RGTQVYDYGKFAIFVMLNYNTNSHALRQLRLTQLTEILSGG  |
| P21860 | ECAGGCSGPDQDTCFACRHFNDSGACVPRCPQPLVYNKLT   |
| P21860 | GTGSGSRFQTVDSSNIDGFVNCTKILGNLDFLITGLNGDPW  |
| P21860 | RTVREITGYLNIQSWPPMHNFVSVFNSLTTIGGRSLYNRGF  |
| P21860 | TGYLNIQSWPPMHNFVSVFNSLTTIGGRSLYNRGFSLLIMK  |
| P21860 | TIGGRSLYNRGFSLLIMKNLNVTS LGFRSLKEISAGRIYIS |
| P21860 | ISAGRIYISANRQLCYHHSNLNWKVLRGFTTEERLDIKHNRP |
| P21860 | PLCSSGGCWGPGGQCLSCRNYSRGGVCVTHCNFLNGEPRE   |
| P21860 | EAECFSCHPECPMEGTATCNGSGSDTCAQCAHFRDGPCHV   |



|        |                                             |
|--------|---------------------------------------------|
| P21860 | AKGPYKYPDVQNECRPCHECTQGCKGPELQDCLGQTLVL     |
| Q15303 | AIFLNRYRKDGNFGLQELGLKNLTELNGGVYVDQNKFLCYA   |
| Q15303 | FLCYADTIHWQDIVRNPWFNSLTLVSTNGSSGCRCHKSCCT   |
| Q15303 | IHWQDIVRNPWFNSLTLVSTNGSSGCRCHKSCCTGRCWGPT   |
| Q15303 | ECAGGCSGPKDTCFACMNFNDSGACVTQCPQTFVYNPTTF    |
| Q15303 | GTGSLMSAQTVDSSNIDKFINCTKINGNLI FLVTGIHGDPY  |
| Q15303 | NVFRTVREITGFLNIQSWPPNMTDFSVFNSLVTIGGRVLYS   |
| Q15303 | ISAGNIYITDNSNLCCYHTINWTTLFSTINQRIVIRDNRKA   |
| Q15303 | TTLFSTINQRIVIRDNRKAENCTAEGMVCNHLCS SDGCWGP  |
| Q15303 | RGRICIESCNLYDGEFREFENGSI CVECDPQCEKMEDGLLT  |
| Q15303 | DPQCEKMEDGLLTCHGPGPDNCTKCSHFKDGPNCEKCPDG    |
| Q15303 | ANSFIFKYADPDRECHPCHPNTQGCNGPTSHDCIYYPWTG    |
| Q9Y282 | SFQQSHVHVHDLQSFGLDNI NMTHYIQHLSFGEDYPGIVNP  |
| Q9Y282 | IQHLSFGEDYPGIVNPLDHTNVTAPQASMMFYFVKVPTV     |
| Q969X5 | NELYVDDPKDSSGKIDVSLNLSL PNLHCELVGLDIQDEMG   |
| O94905 | FDRIEVVNFVFNNAVYDIVKNYTADYDKALIFNKIHHELNO   |
| O75477 | IDRIEVVNLAPYAVFDIVRNYTADYDKTLIFNKIHHELNO    |
| Q7Z2K6 | QRPTGSFSIDFLGGFTSYDNI TNVVVKLEPRDGAQHAVLA   |
| Q7Z2K6 | WINGFDYTGISHITPHIPEINDSIRAHCEENAPLCGFPWYL   |
| Q86YB8 | ESKIPVGIKAGHSNKYLMANNKTELEDCEQANKLGAINST    |
| Q86YB8 | MANNKTELEDCEQANKLGAINSTLSNQSKEAFIDWARYDDS   |
| Q86YB8 | KELEDCEQANKLGAINSTLSNQSKEAFIDWARYDDSRDHF    |
| Q86YB8 | FAGDKKGAKSLEEFRLHFKNISRIMDCVCGDKCRLWGKLO    |
| Q96HE7 | VHLSARYLLQETWLEKKWGHNI TEFQQRFDGILTEGEGPRR  |
| Q96HE7 | FAGDKKKAHKLKEDFRLHFRNISRIMDCVCGFKCRLWGKLO   |
| Q09216 | NPYBYSHENPRLRRI IALHANRTTYDFEGHLTQKDNALFVH  |
| Q09216 | DYRGASDLPDHSFLQGSSAPNCTGVVDEYCRMPYYTATHEL   |
| Q09216 | VLPYPIDLKLVSRHAMGENLNLTFEIRGGYDKMSLHVTPLN   |
| Q18600 | VSGCFDIPAHDTGEMNICYRNVSVMARLGKGEKKDKISVL    |
| Q18600 | RTQFFHVNQMLYDRNGQISVNDTRFYAISHDYRGAEDIPFV   |
| Q18600 | VIGTQQISVYIIPDITWLTINTSVTQPKTPQENMFLYYTCS   |
| Q96AP7 | INGVTTSKPGVSLVYSMP SRNLSLRLEGLQEKDSGPYSCSV  |
| Q96AP7 | VLVPAPPSCRLQGVPHVGANVTLSCQSPRSKPAVQYQWDR    |
| Q96AP7 | SFQTFPAPALDVIRGSLSLTNLSSMAGVYVCKAHNEVGTA    |
| Q96AP7 | SSMAGVYVCKAHNEVGTAQCQNVTLVSTGPGA AVVAVGVG   |
| P23953 | PLGSLRFAPPQPAEPWSFVKNATSYPPMCSQDAGWAKILSD   |
| P23953 | NVGKKNIQAVNEI IATLSQCNDTSSAAMVQCLRQKTESELL  |
| P23953 | CLRQKTESELLEISGKLVQYNI SLSTMIDGVVLPKAPPEIIL |
| P23953 | EGKMNEETASLLRRFHSLENI SESMIPAVIEQYLRGVDDP   |
| P23953 | EIFFVFGAPLLKEGASEEETNLSKVMKFWANFARNGPNG     |
| Q04457 | FEKPVAPDPWEDVYPATQYRNDCTPHYRLVAQFSSYSGEDC   |

|        |                                             |
|--------|---------------------------------------------|
| P23141 | PLGPLRFTPPQPAEPWSFVKNATSYPPMCTQDPKAGQLLSE   |
| P12337 | PLGSLRFAPPQPAESWSHVKNNTSYPPMCSQDAVSGHMLSE   |
| P12337 | EGKLDQKTATELLWKSYP IVNVSKELTPVATEKYLGGTDDP  |
| O00748 | HPAMCLQDLTAVESEFLSQFNMTFSDSMSSEDCLYLSIYTP   |
| O00748 | VALLPGLIASSADVISTVVANLSACDQVDSEALVGCGRGKS   |
| P14943 | VALLPGLITSSSEVVSTVVANLSRCGQVDSETLVRCRAKS    |
| Q6UWW8 | EGVRDASTAPPMLQDVESMNSSRFVNLNGKQIFSVSEDCL    |
| Q8I034 | PLGPLRFKQPKPALPGNDFRNATSYPKLCFQDLEWLVSYQH   |
| Q8I034 | KLEASEDCLYLNIIYAPAHADNGSNLPVMVWFFGGAFKMGSA  |
| Q8I034 | NNHECAFLSTEFSEILGGSNRSLALYLVHTFLNIPYQYLH    |
| Q8I034 | HRDAGAPVYFYEFQHPQCLNDRPAFVKADHSDEIRFVFG     |
| P08171 | SDTDDPLLVLQLPQKLRGRDNGSYYSIESIPYAEPTGDLR    |
| P08171 | RFDIESYSELQRLFTDILFKNSTQESLDLHRKYGKSPAYAY   |
| P08171 | PAYAYVDNPAEKQIAQVLANRTDYDFGTVHGDDYFLIFEN    |
| P08171 | DEQIISRNFINMLADFASDNGSLKYGECDFKDNVSEKFO     |
| O60883 | TSPNPGKDGTPDSGQELRGNLTGAPGQRLQIQNPLYPVTE    |
| P23776 | DPYVSGLQESYLDQAIQWARRNSLKVWVDLHGAAGSQNGFD   |
| P23776 | LERSIDEHIKVACEWGTGVLNESHWTVCGEFAAALTDCTKW   |
| P58738 | VLAALVAGGSCGPPKVPVPGPNI TTYNGKWL TARATWYQOP |
| Q9UBQ6 | EIKSQGKSTMDSFTLIMQTYNRDLLLLKLNHYQAVPNLHK    |
| A0A1F4 | QAGFACLSNPCVFGVCIDGLNSYSCYCIDGYTGICQQTNW    |
| A0A1F4 | ECWSSPCQNGGTCVDGVAIYNCTCPEGFSGSNCEENVDECM   |
| A0A1F4 | PLLTGMLCECLMVGEESLDCNYTAPATQSPRRTTTTSTMA    |
| A0A1F4 | ETPVNTGHEITIRAELDFSRNYTHCNASLLVNDTLAMSGDQ   |
| A0A1F4 | TGHEITIRAELDFSRNYTHCNASLLVNDTLAMSGDQPTWLK   |
| A0A1F4 | IRAELDFSRNYTHCNASLLVNDTLAMSGDQPTWLKLPRL     |
| A0A1F4 | YEIKVGRIGRQAWLSVDGKFNITGRSPGSGSRMDVLPILYL   |
| A0A1F4 | YLYDGGDKLGAKRSQMVS YRNFTKMLPCKPIITPSSHVFM   |
| A0A1F4 | PIPFRCVGRGLVVS GTRIVLNETNIVESRNIRDCDGTACGG  |
| A0A1F4 | DKRRGPSLYVRPREAIQVSLNFSTIEPDGLLLWSEHERSKF   |
| A0A1F4 | LGLGLEAGHLKLASNLGSTNDTVRAPASGFADGAWHWT      |
| A0A1F4 | EGGRSLGSTT PRSTLAGRRKNSKEPTISYEDVYLGGFNP    |
| P00488 | EYMGQLEQASLHFFVTARINETRDVLAKQKSTVLT IPEII   |
| P05160 | SQPTCRKEHETCLAPELYNGNYSTQKTFKVKDKVQYECAT    |
| P05160 | TSPPLIKHGVIISS TVDYENGSSVEYRCFDHFFLEGSREA   |
| Q07968 | SQPSCRKEQETCLAPELEHGNYSTQRTFKVKDIVAYCTA     |
| Q07968 | ASPPVIRNGDIVSSAARTYENGSSVEYRCFDNHFLQGSQNV   |
| Q5VUB5 | QGARQPVRVHFQRRALRPENTSYSDLTAFLTAASSPSEVD    |
| Q5VUB5 | TAASSPSEVDSFPYLRGLDGNCTGNSTRHDLTPVTAVSVHL   |
| Q5VUB5 | SPSEVDSFPYLRGLDGNCTGNSTRHDLTPVTAVSVHLLSSN   |
| A8MW0  | QVYVSGELVPLARASVDVFGNRTL LAAGTTDSEGVATLPLS  |

|        |                                             |
|--------|---------------------------------------------|
| A8MVW0 | TQQEMRAFPAFLGTEASSSGNGSWLELMPLTAVSVHLLTGN   |
| A8MVW0 | NGSWLELMPLTAVSVHLLTGNTEVPLSGPIHLSLPVPSET    |
| A8MVW0 | TVGTSIPAWRFDPKSGLWVRNGTGVIRKEGRQLYWTFVSPQ   |
| P00743 | EHYDPADLSPTESSLDLLGLNRTEPSAGEDGSQVVRIVGGR   |
| P00742 | KPYDAADLDPTENPFDLLDFNQTPERGDNNLTRIVGGQEC    |
| P00742 | TENPFDLLDFNQTPERGDNNLTRIVGGQECKDGECWPQAL    |
| O88947 | TAPFPCGKITTGRRKRSVALNTSDSELDLEDALEDFLSP     |
| O88947 | ALLEDFLSPTENPIELNLNETQPERSDDLVRIVGGREC      |
| P03951 | PTRWFTCVLKDSVTETLPRVNRATAISGYSFKQCSHQISAC   |
| P03951 | QISACNKDIYVDLDMKGINYNSSVAKSAQECQERCTDDVHC   |
| P03951 | DVHCHFFTYATRQFPSLEHRNICLLKHTQTGTPTRIKLDK    |
| P03951 | TPAQASCNEGKGCYKLSNNGSPTKILHGRGGISGYTLRL     |
| P03951 | AHCFYGVESPKILRVYSGILNQSEIKEDTSFFGVQEIIHD    |
| P03951 | QYKMAESGYDIALKLETTVNYTDSQRPICLPSKGDNRVIY    |
| P00748 | ARTTILSGAPCQFWASEATYRNVTAEQARNWGLGGHAFCRNP  |
| P00748 | CLQDRPAPEDLTVVLGQERRNHSCEPCQTLAVRSYRLHEAF   |
| Q9XTW2 | LYDLTKNVDFDQLRQNECKKNI TL SKFWEKSEQRNVPEDDN |
| Q9XTW2 | FHLDRVLGFRRAIPTVGRVLNMTTELFEKAEKCLKKTFFFS   |
| Q8IXL6 | GWPKNHTLRILQDFSSDPSSNLSSHLEKLPPAAEPAERAL    |
| Q8IXL6 | FHLDRILDPRVPPVAGRMVNMTKEIRDVTRDKKLWRTFFI    |
| Q8IXL6 | FDFLMGNMDRHHYETFEKFGNETFIIHLDNGRGFGKYSHDE   |
| Q28107 | KMFEKQHVLMFAVFDDESKSWNQTS SLMYTVNGYVNGTMPDI |
| Q28107 | DESKSWNQTS SLMYTVNGYVNGTMPDITVCAHDHISWHLIG  |
| Q28107 | EQNHHKISAITLVSATSTANMTVSPEGRWTIASLIPRHFQ    |
| Q28107 | DYAPIIPANMDKKYRSLHLDNFSNRIGKHYKKVVYKQYQDD   |
| Q28107 | SRSYSIYPHGVTFSPYDNEVNSSSTSGSNTMIRAVRPGETY   |
| Q28107 | RGIQRAADIEQQAVFAVFDENKSWYIEDNIYKFCENPEKVK   |
| Q28107 | ENPEKVKRDDPKFYESNIMSNFTLPAINGYVPESIPILGFC   |
| Q28107 | DADSDYQDELALILGLRSFRNSSLNQEKDELNLTALALEKD   |
| Q28107 | LILGLRSFRNSSLNQEKDELNLTALALEKDSEFI PPSANRS  |
| Q28107 | ELNLTALALEKDSEFI PPSANRSLDSNSSRSHVSRLIAKN   |
| Q28107 | LALEKDSEFI PPSANRSLDSNSSRSHVSRLIAKNFAESLK   |
| Q28107 | HKFSQTRFPAHKTRTRLSQDNSSSRMGPWEDIPSDLLLQ     |
| Q28107 | GEWHLVSEKGSYEIIQDANENKTVNKLPNSPQNDSTRWGEN   |
| Q28107 | EIIQDANENKTVNKLPNSPQNDSTRWGENI PFKNSHGKQSG  |
| Q28107 | KPAYHVPLSPRSFHLRGEVNASFDRRHNSLLHASNET       |
| Q28107 | PRSFHLRGEVNASFDRRHNSLLHASNETSLSIDLNQT       |
| Q28107 | EVNASFDRRHNSLLHASNETSLSIDLNQTFPSMNLSLA      |
| Q28107 | RHNHSLLLHASNETSLSIDLNQTFPSMNLSLAASLPDHDQT   |
| Q28107 | LHASNETSLSIDLNQTFPSMNLSLAASLPDHDQTS PNDTTS  |
| Q28107 | FPSMNLSLAASLPDHDQTS PNDTTSQTSSPPDLYPTVSPPEE |

|        |                                              |
|--------|----------------------------------------------|
| Q28107 | SLSPDLSQLDLKQTSPLDLNQTSHTSSESSQSLPLPEFGQT    |
| Q28107 | QTFPNADIGQMPSPPPDSTLNNTFIPPEFNPLVVVGLSRDD    |
| Q28107 | GEFEFVAYNDPYQTDLRTDINSSRNPDNIAAWYLRNNTGNR    |
| Q28107 | GKTYEDDSPEWFKEDNAIQPNKTYTYVWHATRSGPENPGS     |
| Q28107 | NLGGSRDIHVVFHGGQTLLENGTQQHQHGLGVWVPLLPGSFKTL |
| Q28107 | TTEFCVAYSLDRKNWRIKGNSTRNVMYFGGNSDASTIKEN     |
| P12259 | LRQFYVAAQGISWSYRPEPTNSLNLVTSFKKIVYREYEP      |
| P12259 | YVAAQGISWSYRPEPTNSLNLVTSFKKIVYREYEPYFKK      |
| P12259 | DESKSWSQSSSLMYTVNGYVNGTMDPITVCAHDHISWHLLG    |
| P12259 | EQNHKKVSAITLVSATSTTANMTVGPEGKWIISLTPKHLQ     |
| P12259 | DYAPVI PANMDKKYRSQHLDNFSNQIGKHYKVMYTYEDE     |
| P12259 | SRPYSIYPHGVTFSPYEDEVNSSFTSGRNNMIRAVQPGET     |
| P12259 | HGVTFSPYEDEVNSSFTSGRNNMIRAVQPGETYTYKWNIL     |
| P12259 | RGIQRAADIEQQAVFAVFDENKSWYLEDNINKFCENPDEVK    |
| P12259 | DADYDYNRLAAALGIRSFRNSLNLQEEEEFNLTALALENG     |
| P12259 | AALGIRSFRNSLNLQEEEEFNLTALALENGTEFVSSNTDII    |
| P12259 | RNSSLNLQEEEEFNLTALALENGTEFVSSNTDIVGSNYSSP    |
| P12259 | LALENGTEFVSSNTDIVGSNYSSPSNISKFTVNNLAEFQK     |
| P12259 | TEFVSSNTDIVGSNYSSPSNISKFTVNNLAEFQKAPSHQQ     |
| P12259 | QQATTAGSFLRHGKNSVLNSTAEHSSPYSEDPIEDFLQ       |
| P12259 | PSRMRPWKDPSPDLKQSNSSKILVGRWHLASEKGSYEI       |
| P12259 | EIIQDTDEDTAVNNWLISFQNASRAWGESTPLANKPGKQSG    |
| P12259 | EAYNTFSERRLKHSLVLHKSNETSLPTDLNQTLP SMDFGWI   |
| P12259 | RLKHSLVLHKSNETSLPTDLNQTLP SMDFGWIASLPDHNQN   |
| P12259 | NQTLP SMDFGWIASLPDHNQNSNDTGQASC PGLYQTVPP    |
| P12259 | LPSMDFGWIASLPDHNQNSNDTGQASC PGLYQTVPPPEEH    |
| P12259 | DLQIFYPSESSQSLLLQEFNESFPYPDLGQMPSPSSPTLN     |
| P12259 | NESFPYPDLGQMPSPSSPTLNDFLSKEFNPLVIVGLSKDG     |
| P12259 | AEIDYVPYDDPYKTDVVRTNINSRDPDNIAAWYLRNNGNR     |
| P12259 | GKTYEDDSPEWFKEDNAVQPNSSYTYVWHATERSGPESFGS    |
| P12259 | TTEFYVAYSSNQINWQIFKGNSTRNVMYFNGNSDASTIKEN    |
| O88783 | DSGPTDDPPCLTHIYYSYENLTQDFNSGLIGPLLI CKKGT    |
| O88783 | DESKRSQSPSLMYTINGFVNKTMPDITVCAHDHVSWHLIG     |
| O88783 | NYAPVI PANMDKIYRSQHLDNFSNQIGKHYKVIYRQYEEE    |
| O88783 | SSTEHRSSSYHENDMENPQSNITMVYLLPLGPKGSGNREQD    |
| O88783 | IAANGEDTDVDKLTNSPQNQNI TVPRGESTSHTNTRKPSD    |
| O88783 | TNSPQNQNI TVPRGESTSHTNTRKPSDLPTFSGVGHKSPH    |
| O88783 | DPDQASYPPDSGQASSLPENRNLPHPLDTHIPPPSPSPTL     |
| O88783 | NMGGSRDIHVVFHGGQTLNDRTKQHGLGVWVPLLPGSFKTL    |
| P08709 | VSCTPTVEYPCGKIPILEKRNASKPQGRIVGGKVC PKGECF   |
| P08709 | VPRLMTQDCLQQSRKVGDSPNITEYMFACAGYSDGSKDCKG    |

|        |                                                                         |
|--------|-------------------------------------------------------------------------|
| P22457 | VSCAPTVVEYPCGKIPVLEKRNKSGKPOGRIVGGHVCCKGECF                             |
| P22457 | VGPAWVVSAAHCFERLRSRGNLTAVLGEHDLRSRVEGPEQER                              |
| P00451 | LGELPVDARFPPRVPKSFFNTSVVYKKTFLVEFTDHLFNI                                |
| P00451 | DRDAASARAWPKMHTVNGYVNRSLPGLIGCHRKSVYWHVIG                               |
| P00451 | RGNQIMSDKRNVLFSVFDENRSWYL TENIQRFLPNPAGVQ                               |
| P00451 | IEPRFSQNSRHPSTRQKQFNATTIPENDIEKTDPFWAHRT                                |
| P00451 | NDIEKTDPFWAHRTMPKIQNVSSDLLMLLRQSPTPHGLS                                 |
| P00451 | LQEAKEYETFSDDPSGAI DSNNSLSEMTHFRPQLHHSQDMV                              |
| P00451 | STSNNLISTIPSDNLAAGTDNTSSLGPPSPMPVHYDSQLD TT                             |
| P00451 | GKKSPLTESGGPLSLSEENNSKLESGLMNSQESSWGKN                                  |
| P00451 | NDSKLESGLMNSQESSWGKNVSSTESGRLFKGKRAHG PAL                               |
| P00451 | PALLTKDNALFKVSI SLLKTNKTSNNSATNRKTHIDGPSLL                              |
| P00451 | TKDNALFKVSI SLLKTNKTSNNSATNRKTHIDGPSLLIENS                              |
| P00451 | SDTEFKKVTPLIHDRMLMDKNATALRLNHMSNKTTSSKNME                               |
| P00451 | IHDRMLMDKNATALRLNHMSNKTTSSKNMEMVQQKKEGFIP                               |
| P00451 | EMVFPSSRNLF LTNLDNLHENNTHNQEKKIQEIEKKETLI                               |
| P00451 | NVEGSYDGAYAPVLQDFRSLNDSTNRKTKHTAHFSKKGEEE                               |
| P00451 | SYDGAYAPVLQDFRSLNDSTNRKTKHTAHFSKKGEEENLEG                               |
| P00451 | KKHTAHFSKKGEEENLEGLGNQTKQIVEKYACTTRISPNTS                               |
| P00451 | LGNQTKQIVEKYACTTRISPNTSQQNFVTQRSKRALKQFRL                               |
| P00451 | KVSSFPSIRPIYLTRVLFQDNSSHLPAASYRKKDSGVQESS                               |
| P00451 | RKKDSGVQESSHFLQGAKKNNLSLA I L T L E M T G D Q R E V G S L               |
| P00451 | ISYEEDQRQGAEPKRFVKNPNETKTYFWKVQHMMAPT KDEF                              |
| P00451 | ISQFIIMYSLDGKKWQTYRGNSGTLMVFFGNVDSSGIKHN                                |
| P00741 | SHISKKLTRAE T I F S N T N Y E N S S E A E I I W D N V T Q S N Q S F D E |
| P00741 | ETIFSNNTYENSSEAEI IWDNVTQSNQSFDEF SRVVGGEDA                             |
| P00741 | NTNYENSSEAEI IWDNVTQSNQSFDEF SRVVGGEDA ERGQF                            |
| P00741 | KPEPTEQKRNVIRAIPYHSYNASINKYSHDIALLELDEPLE                               |
| P00740 | VSQTSKLTRAE T V F P D V D Y V N S T E A E T I L D N I T Q S T Q S F N D |
| P00740 | ETVFPDVDYVNSTEAETI LDNITQSTQSFNDFTRVVGGEDA                              |
| 042807 | KEIITVFRGTGSDTNLQLDNTNYTLTPFD TLPQCNDCEVHGG                             |
| Q96BQ1 | RMIMSPVKNVGRGLNIALVNGTTGAVLGQKAFDMYSGDVM                                |
| P10674 | LRDDSELSQFYSLLESNQIANSTLSLRCTIFVPTNEAFQR                                |
| P10674 | LDDINSLTEVTILAPSNEAWNSSNINNVLDRNKMRQILNM                                |
| P10674 | NVDKIRQKNANLIAQVPTVNNNTFLYFNVRGEGSDT VITVE                              |
| P10674 | YFNVRGEGSDT VITVEGGGVNATVIQADVAQTNGYVHIIDH                              |
| P10674 | KLES DPMSD TYKMGKFSHFNDQLNNTQRRFTYFVPRDKGW                              |
| P10674 | DPMSD TYKMGKFSHFNDQLNNTQRRFTYFVPRDKGWQKTE                               |
| P34082 | CRPTVPEPSLVADLQWKDNRNNTI LPKPNGRNQPPMYTETL                              |
| P34082 | PEIISLPTNLEAVEGKPF AANCTARGKPVPEISWIRDATQL                              |
| P34082 | VVDQKTKLNLVLRPQIYELYNVGTGARTKEIATCRACKGRPA                              |

|        |                                             |
|--------|---------------------------------------------|
| P34082 | PDFSHMKELPPVFSWEQRKANLSCLAMGIPNATIEWHWNGR   |
| P34082 | PVFSWEQRKANLSCLAMGIPNATIEWHWNGRKIKDLYDTNL   |
| P34082 | ILAYSVQYKEALNPDWSTAYNRSWSPDSFYIVEGLRPQTEY   |
| Q14517 | DSGSRLEQTPLQFTHLEYNVTVQENSAAKTYVGHVPKMG     |
| Q14517 | KEYKVKAIIGGIDWDSHPFGYNLTQAKDKGTPPFSSVKVI    |
| Q14517 | FHSLRITATDGENFATPLYINITVAASHKLVNLQCEETGVA   |
| Q14517 | LPTGIQVKENQFVGSSEVIFMNSTDLDTGFNGKLVYAVSGGN  |
| Q14517 | TGMLKILSPLDRETTDKYTLNITVYDLGIPQKAAWRLHVV    |
| Q14517 | KLSGAVRIVQQLDPEKKQVYNLTVRAKDKGKFPVLSSTCYV   |
| Q14517 | KGTGTIIVAKPLDAEQKSNYNLTVEATDGTITLQVFIKV     |
| Q14517 | TVMVRDQDVPVKRNFARIVVNVSDTNDHAPWFTASSYKGRV   |
| Q14517 | ETLPYITLIIQGTNMGALSTNTTVLVHLQDENDNAPVFMQA   |
| Q14517 | HFTVQVHDMGTPRFLFAEYAAANVTVHVIDINDCPPVFAKPLY |
| Q14517 | PLYEASLLLPYKGVKVIITVNATDADSSAFSOLITYSITEGN  |
| Q14517 | EGNIGKFSMDYKGTALTVQNTTQLRSRYELTVRASDGRFA    |
| Q14517 | ESKESHLKFTQDVYSAVVKENSTEAEITLAVITAIKNPINEP  |
| Q14517 | VRATDSDSEPNRGISYQMFNGHSHDHFHVDSSSTGLISLL    |
| Q14517 | TGIIITLSNLHRHALKPFYSLNLSVSDGVFRSSTQVHVTVIG  |
| Q14517 | TVEATDGGTPSLSDVATVNVNVDINDNTPVFSQDITYTTVI   |
| Q14517 | TKLLDRETI SGYTLTVQASDNGSPPRVNTTTVNI DVSDVND |
| Q14517 | TISGYTLTVQASDNGSPPRVNTTTVNI DVSDVNDNAPVFSR  |
| Q14517 | TTVNI DVSDVNDNAPVFSRGNYSVITIQENKPVGFSVLQLVV |
| Q14517 | SSTGGKLI AHKKLDIGQYLLNVSVTDGKFTTVADITVHIRQ  |
| Q14517 | KFTTVADITVHIRQVTQEMLNHTIAIRFANLTPEEFVGDYW   |
| Q14517 | LFVEKPGSAQISTKQLLHKINSVTDIEEII GVRILNVFQK   |
| Q14517 | SGNPCLHGALCENTHGSYHCNCSHEYRGRHCEDAAPNQYVS   |
| Q9NYQ8 | EKPLEGILSSAWHFTSHSHYNATIYENS SPKTYVESFEKMG  |
| Q9NYQ8 | RSEMFAIHPTSGVVTVAGKLVNVTWRGKHELQVLAVDRMRKI  |
| Q9NYQ8 | VVTPPDSNDGTTYATVVLVDANS SGAEVESVEVVGDPGKHF  |
| Q9NYQ8 | NEFSLVSVKIDINWMEYLHGFNLSLQARS GSGPYFYSQIRGF |
| Q9NYQ8 | QASTVVVIDIVDCNNHAPLFRNSSYDGTLDENIPPGTSVLA   |
| Q9NYQ8 | VSIFLQLRNLNDNQPMFEVNTGSI RQDWPVGKSIMTMSA    |
| Q9NYQ8 | LEYFDLNFHSGVISLKRPFINLTAGQPTS YSLKITASDGKN  |
| Q9NYQ8 | SYSLKITASDGKNYASPTTLNITVVKDPHFEPVPTCDKTGV   |
| Q9NYQ8 | TGLLTVAAPLDYEATNFYILNVTVYDLGTPQKSSWKLLTVN   |
| Q9NYQ8 | LMTGALILERE LDFERRAGYNLSLWASDGGRPLARRTLCHV  |
| Q9NYQ8 | SVLQLDAWDPDSSSKGKLT FNITSGNYMGFFMIHPVTGLLS  |
| Q9NYQ8 | PVNHMVGVISVEGRPGLFWFNISGGDKMDFDIEKTTGSIV    |
| Q9NYQ8 | KTTGSIVIARPLDTRRRSNYNLTVEVTDGSR TIATQVHIFM  |
| Q9NYQ8 | PIHPGME LLMVRASDEDESEVNSIKTGNADAVT IHPVTGS  |
| Q9NYQ8 | KENLQDRKALVILGAQGNHLNDT LSYFLLNGTDMFHMVQSA  |

|        |                                            |
|--------|--------------------------------------------|
| Q9NYQ8 | LIVILGAQGNHLDNTLSYFLLNGTDMFHMVQSAGVLQTRGVA |
| Q9NYQ8 | ARDGGTPSLQSEEEVLVTVRNKSNPLFQSPYYKVRVPENIT  |
| Q9NYQ8 | VRNKSNFLFQSPYYKVRVPENITLYTPI LHTQARSPEGLRL |
| Q9NYQ8 | RDVSYQIVEDGSDVSKFFQINGSTGEMSTVQELDYEAQQHF  |
| Q9NYQ8 | KVRAMDKGDPPLTGETLVVNVSDINDNPPEFRQPQYEANV   |
| Q9NYQ8 | VNVSDINDNPPEFRQPQYEANVSELATCGHLVLKVQAIQDPD |
| Q9NYQ8 | DTSRLEYLILSGNQDRHFFINSSSGIISMFNLCCKHLDSSY  |
| Q9NYQ8 | YNLRVGASDGVFRATVPVYINTTNANKYSPEFQQHLYEDEL  |
| Q9NYQ8 | EKFSINPNGQIATLQKLDRENSTERVIAIKVMARDGGGRVA  |
| Q9NYQ8 | DENDNPQFKASEYTVSISQSNVSKDSPVIQVLAYDADEGQN  |
| Q9NYQ8 | IEINPVTGVVKVDSLVLLENQTLDFFIKAQDGGPPHWSL    |
| Q9NYQ8 | DVNDNAPRFFPSSHCAVAVFDNTTVKTPVAVVFARPDQGAN  |
| Q9NYQ8 | VSGNEQGRFRLDARTGILYVNASLDFETSPKYFLSIECSRK  |
| Q9NYQ8 | SIECSRKSSSSLSQVTTVMVNI TDVNEHRPQFPQDPYSTRV |
| Q9NYQ8 | TDIAIQVADVNDNPPRFFQLNYSTTVQENSPIGSKVLQLIL  |
| Q9NYQ8 | SDPDPSPENGPYSFRITKGNNGSAFRVTPDGWLVTAEGLSR  |
| Q9NYQ8 | GAPDGKIIAAQGLPRGHYSFNVTVSDGTFTTTAGVHVYVWH  |
| Q9NYQ8 | STARLSILTPRHHLQRSCSCNGTATRFSGQSYVRYRAPAAR  |
| Q9NYQ8 | NWHIHFYKTLQPQAILLFTNETASVSLKLAGVPQLEYHC    |
| Q9NYQ8 | LKLAGVVPQLEYHCLGGFYGNLSSQRHVNDHEWHSILVEEM  |
| Q9NYQ8 | HSILVEEMDASIRLMVDSMGNTSLVVPENCRGLRPERHLLL  |
| Q9NYQ8 | GLRPERHLLGLLILLHSSSNVSGFEGCLDAVVVNEEALD    |
| Q9NYQ8 | GYVCKPPQFSGKHCEQGRENCTFAPCLEGGTCILSPKGAS   |
| Q56VR3 | VFCGGTILSPIYVLTAAHCINETETISVVVGEIDRSRAETG  |
| P83370 | VFCGGTILSPIHVLTAHCINQTKSVSVIVGEIDISRKETR   |
| P81428 | VFCGGTILSPIHVLTAHCINQTKSVSVIVGEIDISRKETR   |
| O77469 | IADGYSCIKVCSTEDTECLGNHTREVLYQFRAVPSLKTIIIS |
| P23142 | CATGISLANEQDRCATPHGDNASLEATFVKRCCCHCLLGRA  |
| P23142 | RLAPNGRNCQDIDECVTGIHNCINETCFNIQGGFRCLAFE   |
| P23142 | NGRNCQDIDECVTGIHNCINETCFNIQGGFRCLAFECPEN   |
| P98095 | CHCPDAGGELICYQLPGCHGNFSDAEEDPERHYEDPYSYD   |
| P98095 | KSCMAGVLGAKEGETCGAEDNDSCGISLYKQCCDCCGLGLR  |
| P98095 | TMTANGRSCKDVDECALGTHNCSEAETCHNIQGSFRCLRFE  |
| P35555 | PRPPVEYLYPSREPPRVLPVNVTDYCVLVRYLCQNGRCIPT  |
| P35555 | TIGSFKCRCDSGFALDSEERNCTDIDECRISPDLCGRGQCV  |
| P35555 | CHNTEGYSRCECPPGHQLSPNISACIDINECELSAHLCPNG  |
| P35555 | SCSPGWIGDGIKCTDLDECSNGTHMCSQHADCKNTMGSYRC  |
| P35555 | LPGLFRCECEIGYELDRSGGNCTDVNECLDPTTCISGNVCN  |
| P35555 | SCCCSLGKAWGTPCEMCPAVNTSEYKILCPGGEGFRPNFIT  |
| P35555 | VNECETPGICGPGTCYNTVGNVTCICPPDYMQVNGGNNCMD  |
| P35555 | GGNNCMDMRRSLCYRNYADNQTCDGELLFNMTKMCCCSY    |

|        |                                             |
|--------|---------------------------------------------|
| P35555 | SLCYRNYADNQTCDEGELLFNMTKKMCCCSYNIGRAWNKPC   |
| P35555 | TNDDQTMCLDINECERDAGNGTCRNTIGSFNCRCHGFIL     |
| P35555 | RMSYCYAKFEGGKCSSPKSRNHKSQECCALKGEGWDFCE     |
| P35555 | ILAGNECVDTDECSVGNPCGNGTCKNVIGGFECTCEEGFEP   |
| P35555 | ACYECKINGYPKRGRKRSTNETDASNIEDQSETEANVSLA    |
| P35555 | RRSTNETDASNIEDQSETEANVSLASWDVEKTAIFAFNISH   |
| P35555 | TEANVSLASWDVEKTAIFAFNISHVSNKVRILELPAITTL    |
| P35556 | GGAGVGGGQGPITGLTILNQITIDICKHHANLCLNGRIPC    |
| P35556 | TIGSFKRCNSGFALDMEERNCTDIDECRISPDLGSGICV     |
| P35556 | SCREGWINGIKCIDLDECSNGTHQCSINAQCVNTPGSYRC    |
| P35556 | LPGMFHCI CDDGYELDRTEGGNCTDIDECADPINC VNLGVN |
| P35556 | SCCCSLGKAWGNPCETCPPVNSTEYITLCPGGEGFRPNPIT   |
| P35556 | DECFAPGVCGPGTCYNTLGNITCICPPEYMQVNGGHNCMD    |
| P35556 | QVNGGHNCMDMRKSFYRSYNGTTCENELPFNVTKRMCCCT    |
| P35556 | RKSFYRSYNGTTCENELPFNVTKRMCCCTYNVKGAWNKPC    |
| P35556 | ASQDQTMCMVDDECERHPCGNGTCKNTVGSYNCLCYPGFEL   |
| P35556 | RQSFCTNFENGKCSVPKAFNTTAKCCCSKMPGEGWGDPC     |
| P35556 | DYTGVRVDTECSIGNPCGNGTCTNVIGSFECNNEGFEF      |
| P35556 | AVEQISLESVDMSPVNMKFNLSHLGSKEHILELRPAIQPL    |
| P24071 | VKIQCQAI REAYLTQLMI IKNSTYREIGRRLKFWNETDPEF |
| P24071 | QLMI IKNSTYREIGRRLKFWNETDPEFVIDHMDANKAGRYQ  |
| P24071 | GLYGKPFLSADRGLVMPGENISLTCSSAHIPFDRFLAKE     |
| P24071 | SLAKEGELSLPQHQSGEHPANFSLGPVDLNVSGIYRCYGWY   |
| P24071 | LPQHQSGEHPANFSLGPVDLNVSGIYRCYGWYNRSPYLWSF   |
| P24071 | FSLGPVDLNVSGIYRCYGWYNRSPYLWSFSPNALELVVTD    |
| P12319 | VPQKPKVSLNPPWNRIFKGENVTLCNGNFFEVSTKWFH      |
| P12319 | VTLTCNGNFFEVSTKWFHNGSLSEETNSSLNIVNAKFED     |
| P12319 | NFFEVSSTKWFHNGSLSEETNSSLNIVNAKFEDSGEYKQCH   |
| P12319 | NIVNAKFEDSGEYKQCHQVNESEPVYLEVFSDWLLQASA     |
| P12319 | VYKVIYKDGKALYWYENHNISITNATVEDSGTYCTGKV      |
| P12319 | YKDGKALYWYENHNISITNATVEDSGTYCTGKVMQLDY      |
| P12319 | SGTYCTGKVMQLDYSEFLNITVIKAPREKYWLQFFIPLL     |
| P12318 | HNGNLIPHTQPSYRFKANNDSGEYTCQTGQTSLSDPVHL     |
| P12318 | QNGKSQKFSHLDPTFSIPQANSHSGDYHCTGNIGYTLFSS    |
| P31995 | HNGNLIPHTQPSYRFKANNDSGEYTCQTGQTSLSDPVHL     |
| P31995 | LVKVTFFQNGKSKKFSRSDPNFSIPQANSHSGDYHCTGNI    |
| P31995 | QNGKSKKFSRSDPNFSIPQANSHSGDYHCTGNIGYTLYSS    |
| P08637 | RVLEKDSVTLKCGGAYS PEDNSTQWFHNESSLISSQASSYFI |
| P08637 | VTLKCGGAYS PEDNSTQWFHNESSLISSQASSYFIDAATVDD |
| P08637 | SSYFIDAATVDDSGEYRCQTNLSTLSDPVQLEVHIGWLLLQ   |
| P08637 | PKATLKDSGSYFCRGLFGSKNVSETVNTITITQGLAVSTIS   |



|        |                                              |
|--------|----------------------------------------------|
| P08637 | SGSYFCRGLFGSKNVSSSETVNIITITQGLAVSTISSFFPPGY  |
| Q9Y6R7 | LLISLSESPASVSILSQADNTSKKVTVRPGESVMVNI SAK    |
| Q9Y6R7 | SQADNTSKKVTVRPGESVMVNI SAKAEMIGSKIFQHAVVIH   |
| Q9Y6R7 | NVAWGNGRVSVTRVITVQVANFTLRLEQRQWKVTVNGVDMK    |
| Q9Y6R7 | NRGNPAVSYVRVVTVAALGTNISIHKDEIGKVRVNGVLTAL    |
| Q9Y6R7 | NEHRGSQAVSYTRSVTLQIYNHSLTLSARWPRKLQVDGVFV    |
| Q9Y6R7 | NVAWGNGRVSVTRVITVQVANFTLRLEQRQWKVTVNGVDMK    |
| Q9Y6R7 | NVAWGNGRVSVTRVITVQVANFTLRLEQRQWKVTVNGVDMK    |
| Q9Y6R7 | NRGNPAVSYVRVVTVAALGTNISIHKDEIGKVRVNGVLTAL    |
| Q9Y6R7 | NEHRGSQAVSYTRSVTLQIYNHSLTLSARWPRKLQVDGVFV    |
| P12314 | VTLHCEVLHLPGSSSTQWFLNGTATQTSTPSYRITSASVND    |
| P12314 | LNGTATQTSTPSYRITSASVNDSGEYRCQRGLSGRSDPIQL    |
| P12314 | VYNVLYYRNGKAFKFFHWNSNLTIILKTNI SHNGTYHCSGMG  |
| P12314 | RNGKAFKFFHWNSNLTIILKTNI SHNGTYHCSGMGKHRYTSA  |
| P12314 | AFKFFHWNSNLTIILKTNI SHNGTYHCSGMGKHRYTSAGISV  |
| P12314 | RYTSAGISVTVKELFPAPVLNASVTSPLLEGNLVTLSCKETK   |
| P12314 | RPGLQLYFSFYMGSKTLRGRNTSSEYQILTARREDSGLYWC    |
| O75636 | HQLTLQGNWELRVELEDFNGNRTFAHYATFRLLEVDHYQL     |
| P30440 | VFFAVANGNELLLDLSLTKVNATEPERTAMKKIQDCYVENG    |
| P68512 | DGNLQKIDAGSGSVGVNNLNETFVLIDNVFTKISGSLKHF     |
| P38993 | SIAVLLFSMLSLAQAEHTTFNWTGWYDNRVNDGLKSRPVIT    |
| P38993 | WPDI TVNKGDRVQIYLTNGMNTNTSMHFHGLFQNGTASMD    |
| P38993 | ITVNBKDRVQIYLTNGMNTNTSMHFHGLFQNGTASMDGVP     |
| P38993 | YLTNGMNTNTSMHFHGLFQNGTASMDGVPFLTQCPIAPGS     |
| P38993 | MDGVFPFLTQCPIAPGSTMVNFYDYNVGTYYWHSHTDGQY     |
| P38993 | SFMSVYNPTGAEPI PQNLIVNNTMNL TWEVQPDTTYLLRIV  |
| P38993 | VYNPTGAEPI PQNLIVNNTMNL TWEVQPDTTYLLRIVNVGG  |
| P38993 | FWIEDHEMTVVEIDGITTEKNVTDMLYITVAQRYTVLVHTK    |
| P38993 | VTDMLYITVAQRYTVLVHTKNDTDKNFAIMQKFDDTMLDVI    |
| P38993 | AIMQKFDDTMLDVI PSDLQLNATS YMVYNKTAALPTQNYVD  |
| P38993 | TMLDVI PSDLQLNATS YMVYNKTAALPTQNYVDS IDNFLDD |
| P38993 | ITVDVMDNLKNGVNYAF FNNTIY TAPKVPTLMTVLSSGDQ   |
| P38993 | TYTAPKVPTLMTVLSSGDQANNSE IYGSNTHTFILEKDEIV   |
| P29695 | KRDVFKCHSTPDSVENVRNC SKCPI LLLPNNPHVVDVSE    |
| P29695 | RGQHKYEPEAYLEFVIVEINCTAQEAHDDHHQCHPYTAGE     |
| P29695 | HAHSHLIQQHIEKNSISPEHNI TILNFVHPDDHTSTSHESH   |
| P02771 | GTRTFQAITVTKLSQKFTKVNFT EIQLVLDVAHVHEHCCR    |
| Q5KQ84 | RGQHKYEPEAFYVEFAIVEVNCTAQEAHDDHHHCHPNTAGE    |
| Q5KQ84 | HAHSHLIEHHIGKYSTSPGQNSTVECVAECPVAFVNKEVPT    |
| Q5KQ81 | RGQHKYEPEAFYVEFAIVEVNCTAQEAHDDHHHCHPNTAGE    |
| Q5KQ81 | HAHSHLIEHHIGKYSTSPGQNSTVECVAECPVAFVNKEVPT    |

|        |                                             |
|--------|---------------------------------------------|
| P12763 | DIEIDTLETTCHVLDPTPLANCSVRQQTQHAVEGDCDIHVL   |
| P12763 | PDSAEDVRKLCPCDCPLLAFLNDSRVVHAVEVALATFNAESN  |
| P12763 | NDSRVVHAVEVALATFNAESNGSYLQLVEISRAQFVPLPVS   |
| P02765 | PDSAEDVRKVCQDCPLLAFLNDRVVHAAKAAALAFNAQNN    |
| P02765 | NDTRVVHAAKAAALAFNAQNNNSNFQLEEISRAQLVPLPPS   |
| P29699 | EMEVDTLETTCHALDPTPLANCSVRQLTEHAVEGDCDFHIL   |
| P29699 | PDSAEDVRKLCPRCPLLTFFNDTNVVHTVNTALAAFNTQNN   |
| P29699 | NDTNVVHTVNTALAAFNTQNNNGTYFKLVEISRAQNVPLPVS  |
| Q58D62 | GATSPQPAARFSSLLSLDCNSSYVLDIANDILQDINRDRK    |
| Q58D62 | QCKAIFYINKEKRIFYLPAYNCTLRPVSQSAIIMTCPCDCPS  |
| Q58D62 | KIISVTCSEFFNSQAPTPRGENATVNQRPANPSKTEELQQQN  |
| Q9UGM5 | GAMSPQLALNPSALLSRGCNDSVLAVAGFALRDINKDRK     |
| Q9UGM5 | QCKAIFYMNNPSRVLYLAAYNCTLRPVSKKKIYMTCPCDCPS  |
| Q9UGM5 | SSNHQVLEAATESLAKYNNENTSKQYSLFKVTRASSQWVVG   |
| Q9QXC1 | SPPAPPLPQRPLSPLHPLGCNDSEVLAVAGFALQINIRDQK   |
| Q9QXC1 | QCKAMFHINKPRRVLYLPAYNCTLRPVSKRKTHTTTCPCDCPS |
| P36386 | NRKLYCATKYHLQIHLNGKINGTLEKNSVFSILEITAVDVG   |
| P05524 | RRKLYCATKYHLQLHPSGRVNGSLENSAYSILEITAVEVGV   |
| P31371 | GILRRRQLYCRTGFHLEIFPNGTIQGRKDHRSRFGILEFIS   |
| Q9MZ06 | SVLKTRVCRKKFPESNLKLVNSTLIRIKKPSQELMEPSFMD   |
| P11362 | LRDDVQSINWLRDGVQLAESNRTRITGEEVEVQDSVPADSG   |
| P11362 | GLYACVTSPPSGSDTTYFSVNVSDALPSEDDDDDDSSSE     |
| P11362 | KVRYATWSIIMDSVVPSPDKGNYTCIVENEYGSINHTYQLDV  |
| P11362 | VVPSDKGNYTCIVENEYGSINHTYQLDVVERSAPHRPILQAG  |
| P11362 | QLDVVERSAPHRPILQAGLPANKTVALGNSVEFMCKVYSDPQ  |
| P11362 | MCKVYSDPQPHIQWLKHIEVNGSKIGPDNLPYVQILKTAGV   |
| P11362 | GSKIGPDNLPYVQILKTAGVNTTDKEMEVLHLRNVSFEDAG   |
| P11362 | ILKTAGVNTTDKEMEVLHLRNVSFEDAGEYTCLAGNSIGLS   |
| P16092 | LRDDVQSINWLRDGVQLVESNRTRITGEEVEVRDSIPADSG   |
| P16092 | GLYACVTSPPSGSDTTYFSVNVSDALPSEDDDDDDSSSE     |
| P16092 | KVRYATWSIIMDSVVPSPDKGNYTCIVENEYGSINHTYQLDV  |
| P16092 | VVPSDKGNYTCIVENEYGSINHTYQLDVVERSAPHRPILQAG  |
| P16092 | QLDVVERSAPHRPILQAGLPANKTVALGNSVEFMCKVYSDPQ  |
| P16092 | MCKVYSDPQPHIQWLKHIEVNGSKIGPDNLPYVQILKTAGV   |
| P16092 | GSKIGPDNLPYVQILKTAGVNTTDKEMEVLHLRNVSFEDAG   |
| P16092 | ILKTAGVNTTDKEMEVLHLRNVSFEDAGEYTCLAGNSIGLS   |
| Q03142 | LPEDAGRYLCLARGSMTVVHNLTLMDDSLTSISNDEDPKT    |
| Q03142 | LLDVLESPHRPILQAGLPANTTAVVGSDELCKVYSDAQ      |
| Q03142 | ICKVYSDAQPHIQWLKHVVINGSSFGADGFPYVQVLKTTDI   |
| Q03142 | GSSFADGFPYVQVLKTTDINSSEVEVLYLRNVS AEDAGEY   |
| Q03142 | VQVLKTTDINSSEVEVLYLRNVS AEDAGEYTCLAGNSIGLS  |

|        |                                             |
|--------|---------------------------------------------|
| Q14314 | NWYWLSSAVLATYGFVANNETEIEIKDERAKDVCVRLES     |
| Q14314 | EKLNLVNMNNIENYVDSKVANLTFVVNSLDGKCSKPSQEQ    |
| Q14314 | DYYAIGKRSSETYRVTPDFKNSSFEVYCDMETMGGGWTVLQ   |
| Q14314 | DMETMGGGWTVLQARLDGSTNFRTRWQDYKAGFGNLRREFW   |
| Q14314 | YDQFYVANEFKYLRLHVGNYNGTAGDALRFNKHYNHDLKFF   |
| Q03591 | EGDTVQIICNTGYRLQNNENNISCVERGWSTPPKCRSTDS    |
| Q03591 | YECRSPYEMFGDEEVMCLNGNWTEPPQCKDSTGKCGPPPI    |
| P36980 | EGDTVQIICNTGYRLQNNENNISCVERGWSTPPKCRSTISA   |
| Q02985 | YFPYLENGYNQNYGRKFVQGNSTEVACHPGYGLPKAQTTVT   |
| Q02985 | YILNKEIQYKCKPGYATADGNSSGSITCLQNGWSAQPICIN   |
| Q02985 | NSSGSITCLQNGWSAQPICINSSEKCGPPPI SNGDTSFL    |
| Q02985 | KYYAKTGDTEIFMCKLGYNANTSILSFQAVCREGIVEYPRC   |
| P02671 | LIVTSKGDKELRTGKEKVTSGSTTTTRRSCSKTVTKTVIGPD  |
| P02671 | ETSLGGWLLIQQRMDGSLNFRNTWQDYKRGFGSLNDEGEGE   |
| P02676 | KYKGTAGNALIEGASQLVGENRTMTIHNSMFFSTYDRDNDG   |
| P02675 | KYRGTAGNALMDGASQLMGENRTMTIHNGMFFSTYDRDNDG   |
| P02678 | GQPENDYDTGDDTAADPDSNNTAAALDVRRLPSPGTRVRR    |
| P02679 | YQTKVDKDLQSLLEDILHQVENKTSEVKQLIKAIQLTYNPE   |
| P02679 | DAFDGDFGDDPSDKFFTSHNGMQFSTWDNDNDKFEGNCAE    |
| P04115 | CEIENGNWTVIQHRHDGSSVNFTRDWVSYREGFGYLAPTLT   |
| Q8TAL6 | SFFCHLCQGYFDGPLYPEMSNGTLHHYFVDPGDYEENDDE    |
| P07589 | TRGGNSNGALCHFPFLYNNHNYTDCTSEGRDRNMKWCETTQ   |
| P07589 | CVAYSQLRDQCIVDGITYNVNDTFHKRHEEGHMLNCTCFGQ   |
| P07589 | GITYNVNDTFHKRHEEGHMLNCTCFGQGRGRWKCDPVDQCC   |
| P07589 | NLPETANSVTLSDLQPGVQYNITII YAVEENQESTPVFIQQE |
| P07589 | KPLTAQQATKLDAPTNLQFINETDFTVIVTWTPPRARIVGY   |
| P07589 | VVHADQSSCTFENLSPGLEYNVSVYTVKDDKESVPI SDTII  |
| P07589 | TDLSFVDITDSSIGLRWTPNSSTII GYRITVVAAGEGIPI   |
| P07589 | HVPRGDVDHHLYPHVGLNPNASTGQEALSQTTISWTPFQE    |
| P02751 | TRGGNSNGALCHFPFLYNNHNYTDCTSEGRDRNMKWCETTQ   |
| P02751 | CIAYSQLRDQCIVDGITYNVNDTFHKRHEEGHMLNCTCFGQ   |
| P02751 | DITYNVNDTFHKRHEEGHMLNCTCFGQGRGRWKCDPVDQCC   |
| P02751 | NLPETANSVTLSDLQPGVQYNITII YAVEENQESTPVVIQQE |
| P02751 | KPLTAQQTTKLDAPTNLQFVNETDSTVLVVRWTPPRAQITGY  |
| P02751 | VVHADQSSCTFDNLSPGLEYNVSVYTVKDDKESVPI SDTII  |
| P02751 | HIPREDVDYHLYPHGPGLNPNASTGQEALSQTTISWAPFQD   |
| P11276 | TRGGNSNGALCHFPFLYNNRNYTDCTSEGRDRNMKWCETTQ   |
| P11276 | CIPYSQLRDQCIVDGITYNVNDTFHKRHEEGHMLNCTCFGQ   |
| P11276 | DITYNVNDTFHKRHEEGHMLNCTCFGQGRGRWKCDPIDQCC   |
| P11276 | NLPETANSVTLSDLQPGVQYNITII YAVEENQESTPVFIQQE |
| P11276 | QGRESNPLTAQQTTKLDAPTNLQFVNETDRTVLVWTPPRA    |

|        |                                              |
|--------|----------------------------------------------|
| P11276 | NPLTAQQTTKLDAPTNLQFVNETDRTVLVTTWTPPRARIAGY   |
| P11276 | VVHADQSSCTFENLNPGLYEVNSVYTVKDDKESAPISDVTV    |
| P11276 | TDLSFVDITDSSIGLRWTFPLNSSTIIGYRITVVAAGEGIPI   |
| P11276 | HVPRGDVDYHLYPHVPLGNPNASTGQEALSQTTISWTFPQE    |
| Q96AY3 | HIPRACPREVQMGDFVRYHYNGTFEDGKKFDSYDRNTLVA     |
| Q96AY3 | LRPPHCPRMVQDGFVRYHYNGTLLDGTSTSYSKGGTYD       |
| Q96AY3 | ELPPGCVRRAGAGDFMRYHYNGSLMDGTLFDSSYSRNHTYN    |
| Q96AY3 | RHYNGSLMDGTLFDSSYSRNHTYNTYIGQGYIIPGMDQGL     |
| Q96AY3 | GACMGERRRITIPPHLAYGENTGDKIPGSAVLI FNVHVID    |
| Q96AY3 | FHNPADVVEIRTLRSPSETCNETTKLGFVRYHYNCSLLDG     |
| Q96AY3 | RPSETCNETTKLGFVRYHYNCSLLDGTQLFTSHDYGAPQE     |
| O95302 | FKPPSCPRTIQVSDFVRYHYNGTFLDGTLFDS SHNRMTYD    |
| O95302 | VVPENCERISQSGDFLRYHYNGTLLDGTLDSSYSRNRTFD     |
| O95302 | RHYNGTLLDGTLDSSYSRNRTFDYIGQGYVIPGMDEGL       |
| O95302 | YKPPDCSVLSKKG DYLYKHYNASLLDGTLLDSTWNLGKTYN   |
| Q9Z247 | FKPPSCPRTIQVSDFVRYHYNGTFLDGTLFDS SHNRMTYD    |
| Q9Z247 | VVPENCERRSQSGDFLRYHYNGTLLDGTLDSSYSRNHTFD     |
| Q9Z247 | RHYNGTLLDGTLDSSYSRNHTFDYIGQGYVIPGMDEGL       |
| Q9Z247 | YKPPDCSVLSKKG DYLYKHYNASLLDGTLLDSTWNLGKTYN   |
| Q9H9S5 | SARLVAAPVATANPARCLALNVSLREWTARYGAA PAAPRCD   |
| Q9H9S5 | PRCDALDGDVLLRARDLFNLSAPLARVGTSLFLQTALR       |
| P27803 | TLIVFIAMVLVAAVAASVLINTSGFLQQKASTTGKESTEQV    |
| P27803 | GKESTEQVASGLQVTGVTGVNSTDSENI THIVAYITPKAGS   |
| P27803 | QVASGLQVTGVTGVNSTDSENI THIVAYITPKAGSSAIDLS   |
| P27803 | DLSQAKLFVTVNGVSAVLKANESAIDGTSGTPDVL SATLLS   |
| P27803 | ESAI DGTSGTPDVL SATLLSNTSATEYQVVS LQDFDGSVAK |
| P27802 | TLIVFIAMVLVAAVAASVLINTSGFLQQKASTTGKESTEQV    |
| P27802 | GSCTAESPVIGKDMAVITINCTNLDLAPRTRLNGYLQSEI     |
| P27804 | TLIVFIAMVLVAAVAASVLINTSGFLQQKASTTGKESTEQV    |
| P27804 | KESTEQVASGLQISQVMGMHNSNINKTAIYISP NAGSSAI    |
| P27804 | QVASGLQISQVMGMHNSNINKTAIYISP NAGSSAIDLSQA    |
| P27804 | DLSQAVIMLSDGSNKRVYKYNESYKDLTNGGDI FDNANVE    |
| P27804 | ESCTAANPVINKGDLVAITLNTTSFSTTPRTSITGTVQPEF    |
| P27805 | TTVVTFSTDDRKMSLLYDSSNASNGGKVR LSTANGTSDIFK   |
| P27805 | SLLYDSSNASNGGKVR LSTANGTSDIFKYDDVYAIGAWPFE   |
| D4GWY0 | QQSVNKVTNRVDVVNAHGLVNKTGEERTVDQIFLTVRLAAG    |
| D4GWY0 | SLEDTTVKYLSETTARTLTYN DTVTGS D TADPANLTTGNF  |
| D4GWY0 | EQSDRAEMVINTSTVEGDNTNGTATGQTVKLDITSRNGGTA    |
| O43155 | IQELRV DENRIAVISDMAFQNLTSLERLIVDGNLLITNKGIA  |
| O43155 | LERLDISNNQLRMLTQGVFDNLSNLKQLTARN NPWFCDCSI   |
| O43155 | GRERVTPPISERIQLSIHFVNDTSIQVSWLSLFTVMAYKLT    |

|        |                                            |
|--------|--------------------------------------------|
| Q43155 | YRAVEDTTCSEATTHASYLNNGSNTASSHEQTTSHSMGSPF  |
| Q9NZU0 | LDGNLLNNHGLGDKVFFNLVNLTELSLVRNLSLTAAPVNLPG |
| Q9NZU0 | VFPNAFSYLRQLYRLDMSNNLSNLPQGFDDLDNITQLIL    |
| Q9NZU0 | LDMSNNLSNLPQGFDDLDNITQLILRNNPWYCGCKMKWV    |
| Q9FL28 | SNDPLGVLSDWTTIGSLRHCNWTGITCDSTGHVVSLSLEK   |
| Q9FL28 | VVSLSLEKQLEGLSPAIANLTYLQVLDLTSNSFTGKIPA    |
| Q9FL28 | DVPEEICKTSSLVLIGFDYNNLTGKIPECLGDLVHLQMFVA  |
| Q9FL28 | FVAAGNHLTGSIPVSIPTLANLTDLDLSDGNLTKIIPRDFG  |
| Q9FL28 | LQSLVLTENLEGDIPAEIGNCSSLVQLELYDNQLTGKIPA   |
| Q9FL28 | PISEEIGFLESLEVLTLHSNNFTGEFPQSITNLRNLTVLTV  |
| Q9FL28 | LTLHSNNFTGEFPQSITNLRNLTVLTVGFNNISGELPADLG  |
| Q9FL28 | EFPQSITNLRNLTVLTVGFNNISGELPADLGLLTNLRNLISA |
| Q9FL28 | GFNNISGELPADLGLLTNLRNLSAHDNLLTGPIPPSSISNCT |
| Q9FL28 | LRNLSAHDNLLTGPIPPSSISNCTGLKLLDLSHNQMTGEIPR |
| Q9FL28 | LLDLSHNQMTGEIPRGFGRMNLTFISIGRNHFTGEIPDDIF  |
| Q9FL28 | LTFISIGRNHFTGEIPDDIFNCSNLETLSVADNNTGTLKP   |
| Q9FL28 | EIPDDIFNCSNLETLSVADNNTGTLKPLIGKQLKLRILQV   |
| Q9FL28 | LNILYLHSNGFTGRIPREMSNLTLLQGLRMYSDNLEGPPE   |
| Q9FL28 | PALFSKLESITYLSLQGNKFNCSI PASLKSLSLLNTFDISD |
| Q9FL28 | LTGTIPGELLASLKNMQLYLNFSNNLLTGTIPKELGKLEMV  |
| Q9FL28 | SIPRSLQACKNVFTLDFSQNNLSGHIPDEVFQGMDMIISLN  |
| Q9FL28 | NLSGHIPDEVFQGMDMIISLNLRSNFSGEIPQSGNMTHL    |
| Q9FL28 | IISLNLRSNFSGEIPQSGNMTHLVSLDLSSNNLTGEIPE    |
| Q9FL28 | EIPQSGNMTHLVSLDLSSNNLTGEIPELANLSTLKHKLK    |
| Q9FL28 | LVSLDLSSNNLTGEIPELANLSTLKHKLKLANLKGHVPE    |
| Q9FL28 | KLASNNLKGHVPEGVFKINASDLMGNTDLCGSKKPLKPC    |
| P36888 | GTITNQDLFVIKCVLINHKNDSSVGKSSSYPMVSESPEDL   |
| P36888 | AVEVDVSASITLQVLVDAPGNISCLWVFKHSSLNCQPHFDL  |
| P36888 | LKMTETQAGEYLLFIQSEATNYTILFTVSIRNTLLYTLRRP  |
| P36888 | ELENKALEEGNYFEMSTYSTNRTMIRILFAFVSSVARNDTG  |
| P36888 | YSTNRTMIRILFAFVSSVARNDTGYYTCSSSKHPSQSALVT  |
| P36888 | SSSKHPSQSALVTIVEKGFINATNSSEDEYIDQYEEFCFSV  |
| P36888 | KHPSQSALVTIVEKGFINATNSSEDEYIDQYEEFCFSVRFK  |
| P36888 | FSDGYPLPSWTWKKCDKSPNCTEEITEGVWNRKANRNVFG   |
| P36888 | VWNRKANRNVFGQWVSSSTLNMSAIAKGFVLCCKAYNSLGT  |
| P36888 | GTSCETILLNSPGPPFFIQDNI SFYATIGVCLLFIIVLTL  |
| P16549 | LLKCIQFKTKVCSVTKHEDFNNTGQWDVVTLCEGKQESAVF  |
| P13605 | MKYVYFQNNQISSIQEGVFDNATGLLWIALHGNQITSDKVG  |
| P13605 | VGKKVFSKLRHLERLYLDHNNLTRIPSPLRSLRELHLHDN   |
| P13605 | LHLDHNQISRVFNNALEGLNLTALYLHHEIQEVGSSMKG    |
| P13605 | LYVRLSHNSLTNNGLASNTFNSSSLELDLSYNQLQKIPPV   |

|        |                                               |
|--------|-----------------------------------------------|
| P13605 | QGNRINEFSISSFCTVVDVMNFSKLVLRDLGNEIKRSAMP      |
| Q04609 | GFFLLGFLFGWFIKSSNEATNITPKHNMKAFLDELKAENIK     |
| Q04609 | HNMKAFLDELKAENIKKFLYNFTQIPHLAGTEQNFQAKQI      |
| Q04609 | KEFGLDSVELAHYDVLLSYPNKTHPNYISIIINEDGNEIFNT    |
| Q04609 | PNKTHPNYISIIINEDGNEIFNTSLFEP PPPGYENVSDIVPP   |
| Q04609 | EDGNEIFNTSLFEP PPPGYENVSDIVPPFAFSPQGMPEGD     |
| Q04609 | VYVNYARTEDFFKLERDMKINCSGKIVIARYGKVFGRNKVK     |
| Q04609 | DSSWRGSLKVPYNVGPFGFTGNFSTQKVKMHIHSTNEVTRIY    |
| Q04609 | SRLQERGVAYINADSSIEGNYTLRVDCTPLMYSLVHNLTK      |
| Q04609 | IEGNYTLRVDCTPLMYSLVHNLTKELKSPDEGFEGKSLYES     |
| Q04609 | HPQEMKTYSVSFDSLFSAVKNFTEIASKFSERLQDFDKSNP     |
| P02702 | PEDSLHEQCSPWRKNACCSVNTSIEAHKDISYLYRFNWDHC     |
| P02702 | SWWEDCRTSYTCKSNWHKGNWNTSGYNQCPVKAACHRFDFY     |
| P14207 | IQDTCLYECSPNLGPWIQQVNQSWRKERFLDVPLCKEDCQR     |
| P14207 | YFPTPAALCEGLWSHSYKVSNSYRSGSGRCIQMWFDSAQGNP    |
| P15328 | PEDKLHEQCRPWRKNACCSVNTSIEAHKDVSYLYRFNWNHC     |
| P15328 | QWWE DCRTSYTCKSNWHKGNWNTSGFNKCAVGAAQPFHFY     |
| P15328 | YFPTPTVLCNEI WTHSYKVSNSYRSGSGRCIQMWFDP AQGNP  |
| Q9P2B2 | VRVPTATLVRVVGTELVI PCNVSDYDGPSEQNF DWSFSSLG   |
| Q9P2B2 | AVEVATVVIQPSVLRRAAVFKNVSV AEGKELDLTCNITTDRA   |
| Q9P2B2 | RAAVPKNVSV AEGKELDLTCNITTD RADDVRPEVTWFSFRM   |
| Q9P2B2 | VSKENSGY YCHVSLWAPGHNRSWHKVAEAVSSPAGVGTW      |
| Q9P2B2 | VSSPAGVGTWLEPDYQVYLNASKVPGFADDPTE LACRVVD     |
| Q9P2B2 | TTEEDRGNY YCVVSAWTKQRNNSWVKS KDVFSPVNI FWAL   |
| Q9P2B2 | SPRYSVLIMAEKPVGDLSSPNETKYI ISLDQDSVVKLENWT    |
| Q9P2B2 | SPNETKYI ISLDQDSVVKLENWTDAS RVDGVVLEKVQEDEF   |
| Q9P2B2 | AATSLSNP IEIDFQTS GPFNASVHSDT P SVIRGDLIKLFC  |
| Q9WV91 | VRVPAGTLVRVVGTELVI PCNVSDYDGPSEQNF DWSFSSSG   |
| Q9WV91 | QLAVPRTVSVTEGKDL DLSCNITTD RVDVVRPEVTWYFKKT   |
| Q9WV91 | VSKENSGY YLCLVALWAPGHNRSWHKVAEAM SAPSGVSVTW   |
| Q9WV91 | MSAPSGVSVTWLEPEYQVYLNASKVPGFSDDPTE LQCRVID    |
| Q9WV91 | TTEEDRGNY YCVVSAWTRQRNNSWVKS KDVFSPVNI FWAS   |
| Q9WV91 | SPRYSVLITAEKPVGDLSSPNETKYI ISLDQDSVVKLENWT    |
| Q9WV91 | SPNETKYI ISLDQDSVVKLENWTDAS RVDGVVLEKVQEDEF   |
| Q9WV91 | AATSLSNP IEIDFQTS GPTFNASVHSDT P SVTRGDLIKLFC |
| Q5SZK8 | LTPDLAAEDAESPDL IIFNLTS PFQPGQGYLVSTDDRSL     |
| Q5SZK8 | DLFTTITQFP THGHIMNQLINGTVLVESFTLDQI IESSSII   |
| Q5SZK8 | HGLLQRRKPTGAFENITLGMNFTQ DEVDNRNLIQYVHLGQEG   |
| Q5SZK8 | PDKLLKFTITQVPIHGHL LFNNTRPVMVFTKQDLNENLISY    |
| Q5SZK8 | QFTQADIDDMKICYVLREGANATSDMFY FAVEDGGGNKLT Y   |
| Q9ZTA9 | SVISYHGGFLGLFPNANTLNNSSTSENQTTKAASSNVVAV      |

|        |                                            |
|--------|--------------------------------------------|
| Q9ZTA9 | GGFLGLFPNANTLNNSSSTSENQTTTKAASSNVVAVEFDTYL |
| Q8K385 | EVTLSGPPFRGFLLEARDAENLSGPPIGSFTLIDSEESQLL  |
| Q8K385 | TLEDMAWRLADGVIQCSFRRNITLPEAKNRFVLESYYIFF   |
| Q8K385 | IQCSFRRNITLPEAKNRFVLESYYIFFAEGP SHDGRIFRH  |
| Q8K385 | SHDGRIFRHSQQPLITYEKYNVTDTPKSVGGSRSSPLLKAH  |
| P01226 | QFCFLFCCWKAVCCNSCELTNITIAVEKEECGFCISINTTW  |
| P01226 | ELTNITIAVEKEECGFCISINTTWAGYCYTRDLVYKDPAR   |
| P01225 | QFFFLFCCWKAICCNCELTNITIAIEKEECRFCISINTTW   |
| P01225 | ELTNITIAIEKEECRFCISINTTWAGYCYTRDLVYKDPAR   |
| Q9PS36 | ELSNITIVLEKEECGACVSVNATWCSGYCYTKDANLMPQK   |
| P23945 | ESVILWLNKNGIQEIHNCANFGTQLDELNLSDNNNLEELPN  |
| P23945 | KNGIQEIHNCANFGTQLDELNLSDNNNLEELPNDVFGASG   |
| P23945 | SHCCAFANWRRQISELHPICNKSI LRQEVDMYTQARGQRSS |
| P23945 | RQEVDMYTQARGQRSSLAEDNESSYSRGDMTYTEFDYDLC   |
| P20395 | ESVILWLSKNGIEEIHNCANFGTQLDELNLSDNNNLEELPN  |
| P20395 | KNGIEEIHNCANFGTQLDELNLSDNNNLEELPNDVFGASG   |
| P20395 | SHCCAFANLKRQISELHPICNKSI LRQDIDDMTQIGDQRVS |
| Q12841 | RIIQWLEAEIIPDGWFSKGSNYSEILDKYFKNFNDNGDSRLD |
| Q12841 | NFDNGDSRLDSSEFLKFVEQNETAINITTYPDQENNKLLRG  |
| Q12841 | DSRLDSSEFLKFVEQNETAINITTYPDQENNKLLRGLCVDA  |
| Q62356 | RLIQWLEAEIIPDGWFSKGSNYSEILDKYFKSFDNGDSHLD  |
| Q62356 | SFDNGDSHLDSSEFLKFVEQNETAINITTYADQENNKLLRS  |
| Q62356 | DSHLDSSEFLKFVEQNETAINITTYADQENNKLLRSLCVDA  |
| Q95633 | QTDVTRAECCASGNIDTAWSNLTHPGNKINLLGFLGLVHCL  |
| Q95633 | CRAAPCPVPSSPGQELCGNNVITYISSCHMRQATCFLGRSI  |
| P10669 | KKCRMNKKNKPRCVAPDCSNI TWKGPVCGLDGKTYRNECA  |
| P10669 | SLCDELCPESKSEEPVCASDNATYASECAMKEAACSSGVLL  |
| Q9DGI0 | FLKLNLETECHVLDPTPVKNCTVRPQHNNHAVEMDCDVKIM  |
| Q9DGI0 | RGQHKYEPAYVEFAIVEVNCTAQELHDDHHHCHPNTAGE    |
| Q9DGI0 | HAHSHLIQQHVEKDSISPEHNNTALNFVHPHNDTSTSHESH  |
| Q9DGI0 | EKDSISPEHNNTALNFVHPHNDTSTSHESHEHLAEVPAFV   |
| Q9BTY2 | NAIDEGPKRDIVKELEVAIRNRDRLRFLGLYLSFEWFHPLF  |
| Q9BTY2 | NYQPEVLWSDGDGGAPDQYWNSTGFLAWLYNESPVRGTVVT  |
| Q9BTY2 | GSWLKVNGEAIYETHTWRSQNDTVTPDVWYTSKPKEKLVYA  |
| P04066 | SYKPDLIWSDGEWECPTWYWNSTNFLSWLYNDSPVKDEVVV  |
| P04066 | WLYNDSPVKDEVVVNDRWGQNCCHGGYINCEDKFKPQSL    |
| P04066 | LSINGEAIYASKPWRVQWEKNTTSVWYTSKGSAYVAIFLHW  |
| P23188 | TSASAPLAAGTIALTLEANKNLTWDRMQHLVVQTSKPAHLN  |
| P23188 | VSHSYGYGLLDAGAMVALAQNWTTVAPQRKCIVEILVEPKD  |
| P23188 | FMTTHSWDEDPAGEWVLEIENTSEANNYGTLTKFTLVLYGT  |
| P35936 | LLPNMPKDKEACAKAPLEAYNRTLTTLLTPLGDSIRRIQES  |

|        |                                               |
|--------|-----------------------------------------------|
| P35936 | GLSQLAVAVGKMQQFVNDQFNKTAQELDCIKITQQVGVLELN    |
| P35936 | YCTRIVTFPMSPGIYSCLSGNTSACMYSKTEGALTPYMTL      |
| P35936 | LSLDGITLRLSGEFDATYQKNISIQDSQVIVTGNLDISTEL     |
| P35936 | QDSQVIVTGNLDISTELGNVNSISNALDKLEESNSKLDKV      |
| P04855 | RLLIPLRDALDLQEALITVTNDTTQAGAPQSRFFGAVIGT      |
| P04855 | FGTIGEKSLTLQALSSLYSANITEIMTTIKTGQSNIDVIY      |
| P04855 | VNGVELYANRRGHDATWGVQNLTVGPAIAIRPIDISLNLAD     |
| Q495W5 | HEESPLNNFLLSHGPGIRLFNLSTFSRHSYPLSLQWLPG       |
| Q495W5 | SHMDCPVPTPGFQVVEEIPENDSWKEMWLQDYWQGLDQGEA     |
| Q8IWF2 | RDMVRYLGFADTLGLRVQYNTTIAHVTLDKDRQAWNGHYF      |
| Q9NQR9 | KWILFGHRPYWVQETQIYPNHSSPCLEQFPPTCETGPGSP      |
| P35575 | KWILFGQRPYWVLDTDYYSNTSVPLIKQFPVTCETGPGSP      |
| O95479 | GRIFYFSVPPFAYEDIARNINSSCRPGGAWLRVLEKPPFG      |
| O95479 | DVLQNHLEVLTLVAMELPHNVSSAEAVLRHKLQVFQALRG      |
| O95479 | CAEEDQGAQIYAREISALVANSFIDLVLGMGADGHTASLF      |
| P56201 | GRMFYFSVPPFAYADIARNINSSCRPGGAWLRVLEKPPFG      |
| P56201 | DTLQNHLETEILTLVAMELPANVSCSEAVLRHKLQAFRALRR    |
| P39012 | FRESEWNI LRGYRSQIKEMVNMTSMERNNLMSWLQEFGTK     |
| Q9UBS5 | LLLLAPLFLRPPGAGGAQTPNATSEGCQI IHPPEGGIRYR     |
| Q9UBS5 | EYVCRGEREVGPKVRKCLANGSWTMDTPSRCVRI CSKSY      |
| Q9UBS5 | VWFLIGWYADNWFKIYDPSINCTVDEMTEAVEGHITTEIVM     |
| Q9UBS5 | EGHITTEIVMLNPANTRSISNMTSQEFVEKLTKRKRHPPEE     |
| Q9UBS5 | GGFQEAPLAYDAI WALALALNKTSGGGRSVRLDFNYNN       |
| Q9UBS5 | NKTSGGGRRSGVRLDFNYNNQITITDQIYRAMNSSSFEQVS     |
| Q9UBS5 | RLEDFNYNNQITITDQIYRAMNSSSFEQVSGHVVFV DASGRM   |
| O75899 | KGSI GRVLP AVELAIEQIRNESLRPYFLDLRLYDTECDN     |
| O75899 | QWII PGWYEPSWWEQVHTEANSRCLRNLLAAMEGYIGVD      |
| O75899 | LQRAME TLHASSRHQRIQDFNYTDHTLGR I I LNAMNETNFF |
| O75899 | RIQDFNYTDHTLGR I I LNAMNETNFFGVTGQVFRNGERMG   |
| O75899 | DSREVKVGEYNAVADTLEIINDTIRFQSEPPKDKTIIILEQ     |
| P54818 | NSNVGAGCWSRI LNQNYINGNMTSTIAWNLVASYEELPYG     |
| P54818 | KTVGHLEKGGSYVALTDGLGNLTII IETMSHQHSMCIRPYL    |
| P54818 | IIETMSHQHSMCIRPYLPYYNVSHQLATFTLKGSLREIQEL     |
| P54818 | ITWAADASSTISVIGDHHWTNMTVQCDVYIETPRSGGVFIA     |
| P54818 | VNKGGILIRSATGVFFWI FANGSYRVTADLGGWI TYASGHA   |
| P54818 | AKRWYTLTLGIKGYFAFGMLNGTILWKNVRVKYPGHGWAAI     |
| P34059 | WEMVGRYEEFPINLKTGEANLTQIYQLQALDFIKRQARHH      |
| P34059 | WTWTNSWENFRQGI DFCPGQNVSGVTTHNLEDHTKPLIFH     |
| O08912 | MKEMFKINQFNLMASEMI ALNRSLPDVRLEGCKTKVYPDNL    |
| O45293 | DPYENLEGWLDLKLPLTERKCNHTLKENL TEAESKSEWGIK    |
| O45293 | EGWLDLKLPLTERKCNHTLKENL TEAESKSEWGIKSF AFDA   |



|        |                                             |
|--------|---------------------------------------------|
| Q8BHN3 | HLIHEVTKVLLVLELQGLQKNMTRIRIDELEPRRPRYRVPD   |
| Q14697 | HLIHEVTKVLLVLELQGLQKNMTRFRIDELEPRRPRYRVPD   |
| P83691 | HQTTTAPAGWPSDINNLAWKLYNYTLDSMNRFADAGIQVDIVS |
| P83692 | HQTMPAGWPSDIDNLSWKLYNYTLDAANKLQAGIQPTIVS    |
| Q14393 | VMKIAVAGDLFQPERGLYHLNLTGGIIPFHEKDLVQPINPR   |
| P28472 | FSAPVLVAVCCAQSVNDFGNMSFVKETVDKLLKGYDIRLR    |
| P28472 | TMYFQQYWRDKRLAYSGIPLNLTLDNRVADQLWVPDIFYLN   |
| P28472 | RITTTAACMMDLRRYPLDEQNCTLEIESYGYTTDDIEFYWR   |
| P03188 | HGDLFRFSSDIQCPSFGTRENHTEGLLMVFKDNIIPYSEKV   |
| P03188 | NAVKMTKDGLTRVYVDRDGVNITVNLKPTGGLANGVRRYAS   |
| P03188 | QGERRAFLDKGTYTLSWKLENRTAYCPLQHWQTFDSTIATE   |
| P03188 | TETGKSIHFVTDEGTSSFVNTTNGIELPDAFKCIEEQVNK    |
| P03188 | TNTTVGIELPDAFKCIEEQVNKTMHEKYEAVQDRYTKGQEA   |
| P03188 | SGGLLLAWLPLTPRSLATVKNLTELTTPTSSPSSPSPAP     |
| P03188 | SAARGSTPAAVLRRRRRDAGNATTPVPPAPGKSLGTLNNP    |
| P03188 | RVPGETMCSRPLVSFSFINDTKTYEGQLGTDNEIFLTKK     |
| P03188 | HHFKTIELDGIATLQTFISLNTSLIENIDFASLELYSRDEQ   |
| P01865 | WVNNVEVHTAQQTTHREDYNSTLRVVSALPIQHQDWMMSGK   |
| P01864 | WVNNVEVHTAQQTTHREDYNSTLRVVSALPIQHQDWMMSGK   |
| P01863 | WVNNVEVHTAQQTTHREDYNSTLRVVSALPIQHQDWMMSGK   |
| Q09324 | PEFFSVRHLELAGDDPYSNVNCTKILQGDPEEIQVKLEIL    |
| Q09324 | LEILTVQFKKRPRRTPHDYINMTRDCASFIRTRKYIVEPLT   |
| P91406 | IIPDEQSGKYAGHQWLAYAGNGSASADVVIINHGTANDFKN   |
| P91406 | ILKRLSGRPAPSDWQGFVGGNLTYLKLGPGFVNGEKL SINVH |
| P91406 | DPNSGTAVLAEVARAMMQTINETSWKPARTIVFNAWDABEF   |
| P91406 | FVNI LQKRAVVYINMDCIQGNI SLHVDVTPLEHAVIEASK  |
| P91406 | VPGGSDHAPFLNFAGVPVINFTFKNYTTWDTYPLYHTMYE    |
| P91406 | SDHAPFLNFAGVPVINFTFKNYTTWDTYPLYHTMYETPFSN   |
| P91406 | PLYHTMYETPFSNIHLDDTDLNSVHKAIGQYWAE LAKTFAD  |
| P91406 | IGQYWAE LAKTFADDVILPMNTTHFASVMLKTYLPQLKTTI  |
| P91406 | FASVMLKTYLPQLKTTISGINVSRSDFEDIRTQYALLSKSA   |
| P39905 | KGRRGQRGNRGCVLTAIHLNVTDLGLGYETKEELIFRYCS    |
| P39905 | FRYCSGSCDAAETTYDKILKNLSRNRRLVSDKVGACCRPI    |
| P57083 | PSEAPQIVRGASEDVRKQFYNLTIAWFRMGGNCAIPITVME   |
| P57083 | RMGGNCAIPITVMEYTECSYNKSLGACPIRTQPRWNYDSF    |
| P57083 | HGPKAPYTSTLLPPELSETPNATQPELAPEDPEDSALLEDP   |
| O60609 | LPSEEPSVPADCLEAAQQLRNSSLIGCMCHRRMKNQVACLD   |
| O60609 | NYELDVSPYEDVTSTKPKMNL SKLNMLKPDSDLCLKFAML   |
| O60609 | LRAYLGLIGTAMTPNFVSNVNTSVALSCTCRGSGNLQEBECE  |
| Q92820 | PGGSVDLRRSDYAKVAKI FYNLSIQSFDDGDYFPVWGTCLG  |
| Q92820 | LISGECLLTATDVTVDVAMPLNFTGGQLHSRMFQNFTELLL   |

|        |                                             |
|--------|---------------------------------------------|
| Q92820 | LSLAVEPLTANFHKWSLSVKNFTMNEKLNKFFNVLTNTDGD   |
| Q920L8 | AEYEELFRSINGVLLPGGGANLTDGYSRVAKIFFSKALES    |
| Q920L8 | LVSGENLLTSTDTKSKKLPNFTGARKSRMFKHFPTELLD     |
| Q920L8 | RKSRMFKHFPTELLDSLALLENLTANFHKWSLSVKNFTENEK  |
| Q920L8 | DSLALLENLTANFHKWSLSVKNFTENEKLNKFFNILLTNTDGD |
| P19440 | VGLMNAHSMGIGGGLFLT IYNSTTRKAEVINAREVAPRLAF  |
| P19440 | KAEVINAREVAPRLAFATMFNSSEQSQKGGLSVAVPGEIRG   |
| P19440 | LPQLADTYETLAIEGAQAFYNGSLTAQIVKDIQAAGGIVTA   |
| P19440 | GIVTAEDLNNYRAELIEHFLNISLGDVVLYMPAPLSGPFVL   |
| P19440 | PSAPLSGPFVLA LILNLIKGYNFSRESVESPEQKGLTYHRIV |
| P19440 | YAKRTL LGDPKFVDVTEVVRNMTSEFFAAQLRAQISDDTTH  |
| P19440 | FGYDVKRAVEEPRLHNQLLPNVTTVERNIDQAVTAALETRH   |
| Q60928 | MGLMNAHSMGIGGGLFFT IYNSTTGKVEVINAREVAPRLAN  |
| Q60928 | NSTTGKVEVINAREVAPRLANTMFNNSKDSEEGGLSVAVP    |
| Q60928 | KVEVINAREVAPRLANTMFNNSKDSEEGGLSVAVPGEIRG    |
| Q60928 | VEVINAREVAPRLANTMFNNSKDSEEGGLSVAVPGEIRGY    |
| Q60928 | MPKLADTLQILAQEGAKAFYNGSLTAQIVKDIQEAGGIMTV   |
| Q60928 | YAKRMLGDPKFVDVSVQVIRNMSSEFYATQLRARITDETH    |
| Q60928 | FGYDVKRAVEEPRLHNQLLPNTTTEVKDIDQVVTAGLIRH    |
| P36268 | LPRLADTYEMLAIEGAQAFYNGSLMAQIVKDIQAAGGIVTA   |
| P36268 | FGYDVKRAVEEPRLHNKLLPNVTTVERNIDQAVTAALETRH   |
| P36269 | TSVVPQSMGLGGGVIFT IYNVTTGKVEVINARETVPASHA   |
| P36269 | LHNSILRPSLQASTLRQLFFNGTEPLRPQDPLWPALATTL    |
| P36269 | PPPPAGGAILSFILNVLRGFNFSTESMARPEGRVNVYHHLV   |
| P36269 | KFAKGQRWRLGDRSHPKLQNASRDLLGETLAQLIRQQIDG    |
| P36269 | AAIAAPILHVNSKGCVEYEPNFSQEVQRGLQDRGQNTQRP    |
| P36269 | VEYEPNFSQEVQRGLQDRGQNTQRPFFLNVVQAVSQEGAC    |
| P48546 | YRRECQETLAAEPPSGLACNGSFDMYVCWDYAAPNATARA    |
| P48546 | SGLACNGSFDMYVCWDYAAPNATARASCPWYLPWHHVAAG    |
| Q68CQ7 | IRKLSMKASTCSFNPGVFVANL TEWKRONITNQLEKWMKLN  |
| Q68CQ7 | STCSFNPGVFVANL TEWKRONITNQLEKWMKLNVEEGLYSR  |
| P28316 | LYKHFENYPSMREAFKDRENYTAEDVQKDPFFVKQQRIL     |
| P25974 | RAELSEDDVFI PAAYPFVFNATSNLNF LAFGINAENNRN   |
| O94923 | PQGYFYPIQIAQYGLSHYSKNL TEKPPHIEVYETAEDRDKN  |
| O16580 | FSGRVYSYNDVANDYSMQNFNLTKEDFQWKIPIYIKNAQKYN  |
| P81447 | QPQNQPKLPLSILKEKQLRNATLGSEETTEHAPSASTTE     |
| P80195 | QPQSQPKLPLSILKEKHLRNATLGSEETTEHTPSASTTE     |
| P04062 | SGARPCIPKSPGYSSVVCNATYCDSPDPPTFPALGTFSR     |
| P04062 | RYESTRSGRRMELSMGPIQANHTGTGLLLTIQPEQKFQKVK   |
| P04062 | CDFSIRTYTYADTPDDFQLHNFSLPEEDTKLKIPLIHRALQ   |
| P04062 | GFTPEHQDFIARDLGPTLANS THHNVRLMLDDQRLLLPH    |

|        |                                               |
|--------|-----------------------------------------------|
| P04062 | NLDLDAVALMHPDGSAVVVVVLNRSSKDVPLTIKDPVAVGFLET  |
| P17439 | YGAQPCIPKSFYSSVVCNASYCDSLDPVTLPALGTFSR        |
| P17439 | RYESTRRGRMELSVGAIQANRTGTGLLLTLQPEKKFQKVK      |
| P17439 | CDFSIRVYTYADTPNDFQLSNFSLPEEDTKLKIPLIHQALK     |
| P17439 | GFTPEHQRFISRDLGPALANSSHVKKLLMLDDQRLLLPRW      |
| P17439 | TDLETVALLRPDGSAVVVVVLNRSSDEVPLTISDPDLGFLET    |
| P37036 | CFSRAYPTPARSKKTMLVPKNI TSZATCCVAKAFKATVMG     |
| P01217 | CFSRAYPTPARSKKTMLVPKNI TSEATCCVAKAFKATVMG     |
| P01215 | CFSRAYPTPLRSKKTMLVQKNVTSESTCCVAKSYNRVTVMG     |
| P01220 | CFSRAYPTPARSRKTMLVPKNI TSESTCCVAKAFIRVTVMG    |
| P80051 | CYSRAYPTPMRSKKTMLVPKNI TSEAKCCVAKTQYRVTVMD    |
| P25329 | CFSRAYPTPARSKKTMLVPKNI TSZATCCVAKAFKATVMG     |
| P01219 | CFSRAYPTPARSKKTMLVPKNI TSEATCCVAKAFKATVMG     |
| P07474 | CFSRAYPTPARSKKTMLVPKNI TSEATCCVAKAFKATVMG     |
| P01218 | CFSRAYPTPARSKKTMLVPKNI TSEATCCVAKAFKATVMG     |
| P37204 | CFSRAFPTPLKAMKTMTI PKNI TSEATCCVAKHSYETE VAG  |
| Q9JHJ3 | EVISGWPNPQNLLHIRAVGSNSTLHYVWSSLGPPAVVLVAT     |
| Q9JHJ3 | STLHYVWSSLGPPAVVLVATNTTQSVLSVNWSLLSPDPAG      |
| Q9JHJ3 | SSIQFSSALVFTRLEFDSTNASEGAQPPGKPYPPYSLAKF      |
| Q9JHJ3 | GAQPPGKPYPPYSLAKFSWNNITNSLDLANLSADFQGRFVD     |
| Q9JHJ3 | ANLSADFQGRPVDDPTGAFANGSLTFKVQAFSRSGRPAQPP     |
| Q9JHJ3 | LHTADVQCQLEVALVGASPRGNHSLFGLEVATLGQGPDCFSV    |
| P43220 | RRQCQRSLTEDPPPATDLFCNRTFDEYACWPDGEPGSFVNV     |
| P43220 | CNRTFDEYACWPDGEPGSFVNVSCPWYLPWASSVPQGHVYR     |
| P43220 | VPQGHVYRFCTAEGWLQKDNSSLPWRDLSECEESKRGERS      |
| P02724 | VAMHTSTSSSVTKSYISSQTNDTHKRDTYAATPRAHEVSEI     |
| P02725 | NATVTAGKPSATSPGVMT IKNTTAVVQKETGVPE SYHQDFS   |
| Q10914 | IGETSKKFPLRAFVASTDIDNDTAHAI IEMLRLAEMTFNAL    |
| Q10914 | FKEFLNEFHRRISTQHTLKSNDSSSEEI DEPIPVNVIVDLEG   |
| Q10914 | VFSNFDVDETDLSGFHFLINITIFRIFDKNNKFLKTRAE       |
| Q10914 | DKDGTLTGRIQFDKVTGKRTNFSAEIIVEIKPGVNSLNSIWE    |
| Q10914 | LKGNDRFEGYCIDLLNLLAKNITGFEYDVVISDGNKYGSRQ     |
| Q10914 | NKYGSRQADGSDWDMIGYLLNETADVAVAPLTI TQERERAV    |
| Q10914 | WNFMVSTTQKQIELEKQSITNSTSNRIFVSSYADGIEKVRT     |
| Q10914 | WYDRGQCDTGTSDGGTSSSLNLSKVAGIFYILLAGMVL SMC    |
| P47871 | AQVMDFLFEKWKLYGDQCHHNSLLPPTTELVCNRTFDKYS      |
| P47871 | YGDQCHHNSLLPPTTELVCNRTFDKYS CWPDP T PANTTANI  |
| P47871 | TELVCNRTFDKYSCWPD T PANTTANISCPWYLPWHHKVQHR   |
| P47871 | CNRTFDKYSCWPD T PANTTANISCPWYLPWHHKVQH R FVFK |
| O45947 | ALSLYKANGYNAYISDMI SLNRSIKDIRHKECKNMMYSAKL    |
| O45947 | MMYSAKLPTVSVIFPFHEEHNSTLLRSVYSVINRSPPELLK     |

|        |                                             |
|--------|---------------------------------------------|
| Q86SR1 | VDQAYRENGFNIVSDKISLNRSLPDIRHPNCNSKRYLETL    |
| Q86SR1 | SLPDIRHPNCNSKRYLETLPNTSIIIPFHNEGWSLLRTRVH   |
| Q8MVS5 | FYSHSLRSSIRSAGWRIDEGNATPRAELSYQARVTVGCTPN   |
| Q8MVS5 | NATPRAELSYQARVTVGCTPNASITTGESPAAPKPPSDPEQ   |
| Q8MVS5 | SHIEVNQQWLEPLLRLIKSENATLAVPVIDLINADTFEYTP   |
| Q17328 | QEILNALLKNYDMVRPPFANSSTEGAVNVRVNIMIRMSK     |
| Q17328 | STPVQLKPGVGSDLPNFIIKKNYTTNADCTSHNTGSGYGLR   |
| G5EBR3 | HSPLQLKVGLSSSLPSFQLTNTSTTYCTSVTNTGIYSCLRT   |
| P03524 | IDIHHLSCPNNLVVEDEGCTNLGFSYMELVGYILAIKMN     |
| P03524 | LCGVLGRLMDGTWVAMQTSNETKWCPPDQLVNLHDFRSDE    |
| P03524 | RRLSHLRKLVPFGFKAYTIFNKTLMEADAHYKSVRTWNEIL   |
| Q3T906 | KSFQNRCLPMPIDVVYTWNGTDELLKELQQVREQMEEE      |
| Q3T906 | QQVREQMEEEQKAMREILGKNTEPTKKSEKLECLLTHCI     |
| Q3T906 | CLLTHCIKVPMLVLDPALPANI TLKDLPSLYPSFHSASDIF  |
| Q3T906 | PSFHSASDIFNVAKPNPSTNVSVVVDSTKDVEDAHSGLL     |
| Q3T906 | LSGFPTFKETNQLKTKLPENLSSKVKLLQLYSEASVALLK    |
| Q3T906 | KWKT IHLIMHSGMNATTIHFNLTFQNTNDEEFKMQITVEVD  |
| Q3T906 | KRHDVNSTRRAQEEVKIPLVNI SL LPKDAQLSLNTLDLQLE |
| Q3T906 | LSLNTLDLQLEHGDITLKGYNLSKALLRSFLMNSQHAKIK    |
| Q3T906 | DLETTARFRVETHTQKTI GGNVTKEKPPSLIVPLESQMTKE  |
| Q3T906 | EDMQFAFSYFYLLMSAVQPLNISQVFDEVDTDQSGVLSDRE   |
| Q3T906 | NKYRFEIMGEEETAFKMI RTNVSHVVGQLDDIRKNPRKFVC  |
| Q6S5C2 | AGKCFSLVESTYKYEFCPFHNVTQHEQTFRWNAYSGILGIW   |
| Q6S5C2 | TFRWNAYSGILGIWHEWEI INNTFKGMWMTDGDSCHSRSRQ  |
| P15586 | CCPSRASILTGYPHNHHVVNNTLEGNCSSKSWQKIQEPNT    |
| P15586 | SILTGYPHNHHVVNNTLEGNCSSKSWQKIQEPNTFPAILR    |
| P15586 | EHVPLGWSYWYALEKNSKYNYTSLINGKARKHGENYSVDY    |
| P15586 | NSKYNYTSLINGKARKHGENYSVDYLTDLVANVSLDFLDY    |
| P15586 | GKARKHGENYSVDYLTDLVANVSLDFLDYKSNFEPFMMIA    |
| P15586 | FNIHGTNKHHLIRQAKTPMTNSSIQFLDNAFRKRWQTL LSV  |
| P15586 | LSVDDLVEKLVKRLFTGELNNTYIFYTSDNGYHTGQFSLP    |
| P15586 | QLYEFDIKVPLLVVRGPGIKPNQTSKMLVANIDLGP TILDIA |
| P15586 | MLVANI DLGPTILDIAGYDLNKTQMDGMSLLPILRGASNLT  |
| P15586 | DLNKTQMDGMSLLPILRGASNL TWRSDVLVEYQGEGRNVTD  |
| P15586 | GASNLTWRSDVLVEYQGEGRNVTDPTCPSLSPGVSQCFPDC   |
| P15586 | PSLSPGVSQCFPDCVEDAYNNTYACVRTMSALWNLQYCEF    |
| P15586 | ALWNLQYCEFDDQEVFVEVYNLTADPDQITNIAKTIDPELL   |
| Q91XA2 | HSFQLENVNKLHQDEKAVLVNNIT TGEKLI RDLQDLKALQ  |
| Q91XA2 | SFQLENVNKLHQDEKAVLVNNIT TGEKLI RDLQDLKALQR  |
| Q91XA2 | LKALQRSYSSLQDIFQFQKNQTSLEKKFSYDLNQCISQMT    |
| Q91XA2 | LQEEVPSEEQMPQEKGDVPRNKSQIPAPNSESGLKPQVQN    |

|        |                                              |
|--------|----------------------------------------------|
| Q8NBJ4 | NFQLESVNKLYQDEKAVLVNNITTTGERLIRVLQDQLKTLQR   |
| Q8NBJ4 | LKTLQRNYGRLQQDVLQFQKNQTNLERKFSYDLSQCINQMK    |
| Q86XS8 | PARLAALALLTCSLWPARADNASQEYYTALINVTVQEPGRG    |
| Q86XS8 | CSLWPARADNASQEYYTALINVTVQEPGRGAPLTFRIDRGR    |
| Q86XS8 | QTRFFVPPNIKQWIALLRGNCTFKEKISRAAFHNNAVAVVI    |
| Q86XS8 | FKEKISRAAFHNNAVAVVIYNNKSKEEPTMTHPGTGDI IAV   |
| Q86XS8 | IIAVMITELRGKDI LSYLEKNI SVQMTIAVGTTRMPPKNFSR |
| Q86XS8 | LEKNISVQMTIAVGTTRMPPKNFSRGLVFSVIFIVLMIIS     |
| Q19791 | SDDAVYIVHLHRWNQIPDSHNKSVPHFSNSNFAPMVLYLDS    |
| Q19791 | LYGMLALPSGIHTVEPIISGNGTEHDGASRHRQHILVRKFDP   |
| Q19791 | HRQHILVRKFDPMHFKSFHDLNSTSVNETETTVATWQDQWED   |
| Q19791 | VRKFDPMHFKSFHDLNSTSVNETETTVATWQDQWEDVIERK    |
| Q19791 | IAFQDVTLEYSGSDAIEERINGTGPIRSDIYVHVLSVGSHP    |
| Q19791 | FGVWSDCSAKCGDGVQYRDANCTDRHRSVLEPHRCLKMEKI    |
| Q19791 | QCSVSCEDGWSSRRVSCVSGNGTEVDMSLCGTASDRPASHQ    |
| Q19791 | DVPPIRWATGPWTACSATCGNGTQRRLKCRDHVRDLDPDEY    |
| Q19791 | KMAEWEECPATCGTHVQQSRNVTCVSAEDGGRTILKDVDCD    |
| Q19791 | ETRKPKMFDKCNEELCPPLTNNQWQISPWTHCSVSCGGGVQ    |
| Q19791 | EIKPREQRDCEMPPCRSHYHNKTSASMTSLSSNSNTTSS      |
| Q19791 | SHYHNKTSASMTSLSSNSNTTSSASASSLPILPPVVSQ       |
| Q19791 | SAKCGRGTKRVRVVECVNPSLNVTVASTECDQTKKPVVEVRC   |
| Q19791 | KSCGEGVQTRVRCRRKINFNSTIPIIFMLEDEPAVPKEKC     |
| Q19791 | FMLEDEPAVPKEKCELFKPNESQTCELNPCDSEFKWSFGP     |
| Q19791 | NCLPSTCQELKSQNVKAKDGNYSIILLDGFTEIYCHRMNST    |
| Q19791 | DGNYSIILLDGFTEIYCHRMNSTIPKAYLNVNPRTNFAEVY    |
| Q19791 | AEVYGKLIYPHTCPFNGDRNDSCHCEDGDASAGLTRFNK      |
| P13006 | GDIFGSSVDHAYETVELATNNQTALIRSGNGLGGSTLVNGG    |
| Q86SQ4 | LDNGESQTKFCGATAKGLSFNSSANEMHVSFSSDFS IQKKG   |
| Q86SQ4 | SANEMHVSFSSDFS IQKKGFNASYIRVAVSLRNQKVLIPQT   |
| Q86SQ4 | CFEATKVGHEDSDWTAFSYSNASFTQLLSFGKAKSGYFLSI    |
| Q86SQ4 | PVKEKEDI FAESFEQLCLVWNNLSLGSIGVNFKRNYETVPCD  |
| Q86SQ4 | GSNQNEIVSLKGDINYFRLWNFTMNAKILSNLSCNVKGNVV    |
| Q86SQ4 | KGDIYNFRLWNFTMNAKILSNLSCNVKGNVVDWQNDFWNIP    |
| Q86SQ4 | VVDWQNDFWNIPNLALKAESNLSCGSYLIPLPAELASCAD     |
| Q86SQ4 | IQNILRHPEVKVQSKVAEWLNSTFQNWNYTVYVVNISFHLS    |
| Q86SQ4 | PEVKVQSKVAEWLNSTFQNWNYTVYVVNISFHLSAGEDKIK    |
| Q86SQ4 | KVAEWLNSTFQNWNYTVYVVNISFHLSAGEDKIKVKRSLED    |
| Q86SQ4 | KVKRSLEDEPRLVLWALLVYNATNNTNLEGGKI IQQKLLKNN  |
| Q86SQ4 | RSLEDEPRLVLWALLVYNATNNTNLEGGKI IQQKLLKNNESL  |
| Q86SQ4 | NATNNTNLEGGKI IQQKLLKNNESLDEGLRLHTVNVRLGHG   |
| Q86SQ4 | EYVLPCKPKGFSASRICFYNATNPLVTVYWGVPVDISNCLKE   |

|        |                                             |
|--------|---------------------------------------------|
| Q86SQ4 | GPVDISNCLKEANEVANQILNLTADGQNLTSANITNIVEQV   |
| Q86SQ4 | CLKEANEVANQILNLTADGQNLTSANITNIVEQVKRIVNKE   |
| Q86SQ4 | NEVANQILNLTADGQNLTSANITNIVEQVKRIVNKEENIDI   |
| Q86SQ4 | LESSSEALKTIDELAFKIDLNSTSHVNI TTRNLALSVSLL   |
| Q86SQ4 | ALKTIDELAFKIDLNSTSHVNI TTRNLALSVSLLPGTNAI   |
| Q86SQ4 | TTRNLALSVSLLPGTNAISNFSIGLPSNNEYSFQMFESG     |
| Q86SQ4 | SSLLPGTNAISNFSIGLPSNNEYSFQMFESGQVDPLASVI    |
| Q86SQ4 | LENLSPEDSVLVRRAQFTFFNKGTGLFQDVGPRKTLVSYVM   |
| Q86SQ4 | QDVGPRKTLVSYVMACSIGNITIQNLKDPVQIKIKHTRTQ    |
| Q86SQ4 | KHTRTQEVHHPICAFWDLNKNKSFSGWNTSGCVAHRSDAS    |
| Q86SQ4 | VHHPICAFWDLNKNKSFSGWNTSGCVAHRSDASETVCN      |
| Q6F3F9 | LDNGESQTKFCGATAKGLSFNSSVEMHVSFSSDFSQKKG     |
| Q6F3F9 | SVEMHVSFSSDFSQKKGFNASYIRVAVSLRNQKVI LPQT    |
| Q6F3F9 | PVKDKEDIFTENLEQLCLVWNNWSGWSIGINFKKNYETVPCD  |
| Q6F3F9 | GSDRDEVASLRGSIYNFRLWNFTMDLKALSNLSCSVSGNVI   |
| Q6F3F9 | RGSIYNFRLWNFTMDLKALSNLSCSVSGNVIDWHNDFWSIS   |
| Q6F3F9 | VIDWHNDFWSISTQALKAEGNLSCGSYLIQLPAAELTNCSE   |
| Q6F3F9 | AEGNLSCGSYLIQLPAAELTNCSELGTLCDGIMYRISVVI    |
| Q6F3F9 | IHNDFNHPEVKVQTKVAEWLNSTFQNWNYTVYVVNISFHQK   |
| Q6F3F9 | PEVKVQTKVAEWLNSTFQNWNYTVYVVNISFHQKVGEDRMK   |
| Q6F3F9 | KVAEWLNSTFQNWNYTVYVVNISFHQKVGEDRMKVKRDIMD   |
| Q6F3F9 | VKRDIMDDKRLVLWALLVYNATNNVSLNEEKIKQKLMTNN    |
| Q6F3F9 | IMDDKRLVLWALLVYNATNNVSLNEEKIKQKLMTNNASLE    |
| Q6F3F9 | NATNNVSLNEEKIKQKLMTNNASLEGLRLCEVDVNQLGMC    |
| Q6F3F9 | VYKQPCPNKPGFFMTRACLSNGTSTFWGPDVTSNCSRQSNE   |
| Q6F3F9 | MTRACLSNGTSTFWGPDVTSNCSRQSNEVANEILNQTDGQ    |
| Q6F3F9 | GPVDTSNCSRQSNEVANEILNQTDGQNLTSANINSIVEKV    |
| Q6F3F9 | CSRQSNEVANEILNQTDGQNLTSANINSIVEKVKRIVNKE    |
| Q6F3F9 | ETQNLALGVSSLI PGTNAPS NFSIGLPSNNEYSFQMDFGNG |
| Q6F3F9 | SSLI PGTNAPS NFSIGLPSNNEYSFQMDFGNGQTDPLASVI |
| Q6F3F9 | LENLSPEDSVLVRRAQFTFFNKGTGLFQDVGSRKVLVSYVM   |
| Q6F3F9 | QDVGSRKVLVSYVMACSIGNITIQNLKDPVQIKIKHTRTQ    |
| Q6F3F9 | KHTRTQEVHHPICAFWDMNKNKSFSGWNTSGCVAHSDL DAG  |
| Q6F3F9 | VHHPICAFWDMNKNKSFSGWNTSGCVAHSDL DGETICLCS   |
| P07359 | HPICEVSKVASHLEVNC DKRNL TALPPDLPKDTTILHLSN  |
| P07359 | LPPGLLTPTPKLEKLSLANNL TELPAGLLNGLENLDTLLL   |
| P13224 | WASLPTAFVDTTELVL TGNNL TALPPGLLDALPALRTAHL  |
| P28993 | PVALLCFFLYFCFCIGSVGSNNTTICMHTTSDT SVHLYA A  |
| P28993 | VALLCFFLYFCFCIGSVGSNNTTICMHTTSDT SVHLYA AN  |
| P28993 | NTTICMHTTSDT SVHLYA ANVTFPSHFQRHFAAQDFVVH   |
| P28993 | GVTMLVHLFANLVLTFFPSLVNCSRPNVNFANASCQVVC SH  |

|        |                                             |
|--------|---------------------------------------------|
| P28993 | NLVLTFFPSLVNCSRPNVVFANASCQVVCVCSHTNSTTGLGQL |
| P28993 | SRPVNVFANASCQVVCVCSHTNSTTGLGQLSFSFVDEDLRLH  |
| P08148 | ARIVANVPNVRGKNFDVVPVINSSTAVAKAREYQGCDTLEYL  |
| P08148 | AFLTNCMEQSVTQWPAMFCNESEDAIRCPTSRLSLGACGV    |
| P08148 | QCDTATRYSVQVHGSNDYTNCTPGLRVELSTVSNAFEFGG    |
| Q52085 | GAVCDATANICEEGTVCIKPNSTAANTICFVLPTLNEDCSG   |
| Q52085 | LPTLNEDCSGPLACADSYCNTTSKICVEAYYLGVGESCSS    |
| Q52085 | PLCGASNSRVGCKAGEGCAFNGTALVCSFFIANGAACNTST   |
| Q52085 | CAFNGTALVCSFFIANGAACNTSTSGLCHPVSSCSNGVCTA   |
| Q52085 | PVSSCSNGVCTAPLTGALNSNCTSNNTDCNIANGLYCSSGKC  |
| Q52085 | IANGLYCSSGKCTAVPEALNNCTTPTVDNCLGYSACMCPS    |
| Q99795 | SNNAEQSDASITIDQLTMADNGTYECSVLSMSDLEGNTKSR   |
| Q99795 | ILNQEQPLAQPASGQPVSLKNISTDTSGYICTSSNEEGTQ    |
| Q99795 | TDTSGYYICTSSNEEGTQFCNITVAVRSPSMNVALYVGVIAV  |
| P35052 | LRICPQGYTCCTSEMEENLANRSHAELETALRDSRVLQAM    |
| P35052 | LQAMLATQLRSFDDHFQHLNDSERTLQATFFGAFGELYTQ    |
| Q9QZF2 | LRICPQGYTCCTSEMEENLANHSRMELESALHDSRALQAT    |
| Q9QZF2 | LQATLATQLHGIDDFQRLNDSERTLQEAFFGAFGDLYTQ     |
| P38875 | ESRTTFPRRSYASDIGAPLFNSTEKLYLMRASLPNEPICTE   |
| P49048 | VIDRYTHYTVNFLTKEVKALNSANMQDYIDSCPARKCLSN    |
| Q14956 | WKGGRVQAVLTSDSPALVGSNITFAVNLIFFRCQKEDANGN   |
| Q14956 | IVYEKNCRNEAGLSADPYVYNWTAWEEDSDGENGTGQSHHN   |
| Q14956 | LSADPYVYNWTAWEEDSDGENGTGQSHHNVPFDGKPFPHHP   |
| Q14956 | LGQYFQKLGRCVSRVSVNTANVTLGPQLMEVTVYRRHGRAY   |
| Q14956 | VYVVTDQIPVFVTMFQKNDRNSDETFLKDLPIIMFDVLIHD   |
| Q14956 | FLKDLPIIMFDVLIHDPSHFLNYSTINYKWSFGDNTGLFVST  |
| Q14956 | YSTINYKWSFGDNTGLFVSTNHTVNHTYVLNGTFSNLTVK    |
| Q14956 | NYKWSFGDNTGLFVSTNHTVNHTYVLNGTFSNLTVKAAAP    |
| Q14956 | GDNTGLFVSTNHTVNHTYVLNGTFSNLTVKAAAPGPCPPP    |
| Q14956 | FVSTNHTVNHTYVLNGTFSNLTVKAAAPGPCPPPPPPPRP    |
| Q14956 | TVCSVDVDEMCLLTVRRTFNGSGTYCVNLTLDGDDTSLALT   |
| Q14956 | DEMCLLTVRRTFNGSGTYCVNLTLDGDDTSLALTSTLISVPD  |
| Q8K209 | LVQGAHSGSPREDFRCGQRNQTQOSTLHYDQSSEPHIFVW    |
| Q8K209 | SLKQGAPLIATSVSWSQIPQNTSLPGAPSFIFSFHNAPHKV   |
| Q8K209 | LPGAPSFIFSFHNAPHKVSHNASVDMCDLKKELQQLSRYLQ   |
| Q8K209 | SKLTSVSLGDTLSFEEDRVNATVWKLPPTAGLEDLHIHSQ    |
| Q8K209 | DDAKRLLVVDFSSQALFQDKNSSQVLGEKVLGIVVQNTKVT   |
| Q8K209 | SSQVLGEKVLGIVVQNTKVTNLSDPVVLTFQHQPQPKNVTL   |
| Q8K209 | KVTNLSDPVVLTFQHQPQPKNVTLQCVFWEEDPASSSTGSW   |
| Q9HCN6 | VLFI PAMKRSLAGRYRCSYQNGSLWSLPSDQLELVATGVFA  |
| P40197 | DAAQCSGGDVARISALGLPTNLTHILLFGMGRGVLQSQSFS   |

|        |                                            |
|--------|--------------------------------------------|
| P40197 | LPASLFTNLENLKLDDLSGNNLTHLPKGLLGAQAKLERLLL  |
| P40197 | LQFHRNHRSIAPGAFDRLPNLSSLTLSRNHLAFLPSALFL   |
| P40197 | LTLSRNHLAFLPSALFLHSHNLTLTLFENPLAELPGVLF    |
| P40197 | LAELPGVLFGEEMGLQELWLNRTQLRTLPAAAFRLNLSRLRY |
| P40197 | LQELWLNRTQLRTLPAAAFRLNLSRLRYLGVTLSPRLSALPQ |
| P40197 | LRQVSLRRNRLRALPRALFRNLSSLESVQLDHNQLETLPGD  |
| P40197 | PPRPAADSSSEAPVHPALAPNSSEPWVWAQPVTTGKGQDHS  |
| P00435 | NCLKYVRPGGGFEPNFMLEKCEVNGEKAHPLFAFLREVLP   |
| P67877 | AQLGPKIGKQFLKPKQCEITNQTVYDFVQVQMLNGAQKSLAE |
| P67877 | TYCAYTMQYRDFNPFILESNSNGTLNILGFPCNQFYLQEPAE |
| P67878 | AQLGPKIGKQFLKPKQCEITNQTVYDFVQVQMLNGAQKSLAE |
| P67878 | TYCAYTMQYRDFNPFILESNSNGTLNILGFPCNQFYLQEPAE |
| P12544 | VAGWGRTHNSASWSDTLREVNITIIDRKVCNDRNHYNFNPV  |
| P10144 | GFLIRDDFVLTAACHWGSINVTLAGAHNIKEQEPTQQFIPV  |
| P10144 | PTQQFIPVKRPIPHPAYNPKNFSNDIMLLQLERKAKRTRAV  |
| P42262 | IIANLGFDTGDLKIQFGGANVSGFQIVDYDDSLVSKFIER   |
| P42262 | QVQVEGLSGNIKFDQNGKRINYTIMELKTNNGPRKIGYWS   |
| P42262 | IGYWSEVDKMMVVTLELPSGNDTSGLENKTVVVTTILESPY  |
| P42262 | DKMVVTLLELPSGNDTSGLENKTVVVTTILESPYVMMKKNH  |
| P19490 | RFALSQLTEPPKLLPQIDIVNISDSFEMTYRFSQFSKGVY   |
| P19490 | ILANLGFMDIDLNKFKEGANVTGFQVLVNYTDTIPARIMQQ  |
| P19490 | DIDLNKFKEGANVTGFQVLVNYTDTIPARIMQQWRTSDSRD  |
| P19490 | QVRFEGLTGNVQFNEKGRRTNYTLHVIEMKHDGIRKIGYWN  |
| P19490 | YWNEDDKFVPAATDAQAGGDNSVQNRTYIVTTILEDPYVM   |
| P19490 | DKFVPAATDAQAGGDNSVQNRTYIVTTILEDPYVMLKKNH   |
| P19491 | IIANLGFDTGDLKIQFGGANVSGFQIVDYDDSLVSKFIER   |
| P19491 | QVQVEGLSGNIKFDQNGKRINYTIMELKTNNGPRKIGYWS   |
| P19491 | IGYWSEVDKMMVVTLELPSGNDTSGLENKTVVVTTILESPY  |
| P19491 | DKMVVTLLELPSGNDTSGLENKTVVVTTILESPYVMMKKNH  |
| P19492 | NTVQEHSAFRFAVQLYNTNQNTTEKPFHLNYHVDHLDSSNS  |
| P19492 | MLANLGFDTILLERVMHGGANITGFQIVNENPMVQQFIQR   |
| P19492 | MVQVQGMTGNIQFDTYGRRTNYTIDVYEMKVSGRKAGYWN   |
| P19492 | KAGYWNEYERFVPSDQQISNDSSSENRTIVVTTILESPY    |
| P19492 | YERFVPSDQQISNDSSSENRTIVVTTILESPYVMMKKNH    |
| P19493 | NTDQEYTAFLAIFLHNTSPNASEAPFNLVPHVDNIETANS   |
| P19493 | IIANLGFKDISLERFIHGGANVTGFQVDFNTPMVTKLMDR   |
| P19493 | QVRIQGLTGNVQFDHYGRRVNYTMDVFELKSTGPRKVGYN   |
| P19493 | VGYWDMDKLVLIQDMPTLGNDTAAIENRTVVVTTIMESPY   |
| P19493 | DKLVLIQDMPTLGNDTAAIENRTVVVTTIMESPYVMMKKNH  |
| P42260 | SGPMGAEELAFRFAVNTINRNRTLTPNTLTLYDTQKINLYD  |
| P42260 | EELAFRFAVNTINRNRTLTPNTLTLYDTQKINLYDSFEASK  |



|        |                                                 |
|--------|-------------------------------------------------|
| P42260 | IFTTLDLFDLVEPYRYSGVNMTGFRI LNTENTQVSSIIEK       |
| P42260 | RFMSLIKEAHWEGLTGRITFNKTNGLRTRDFDLVDV ISLKEEG    |
| P42260 | ISLKEEGLEKIGTWDPASGLNMTESQK GK PANITD SLSNRS    |
| P42260 | GTWDPASGLNMTESQK GK PANITD SLSNRS LIVTTILEE PY  |
| P42260 | GLNMTESQK GK PANITD SLSNRS LIVTTILEE PYVLFK KSD |
| P42260 | VIDFSKPFMTLGISILYRKPNGTNP GVFSFLNPLSPDIW MY     |
| P42260 | SDYAFLMESTTIEFVTQRNCNL TQIGGLIDSKGYGVGTPMG      |
| P42264 | AQVMNAEEHAFRFSANI INRNRTLLPNTTLYDIQR IHFHD      |
| P42264 | EEHAFRFSANI INRNRTLLPNTTLYDIQR IHFHD SFEATK     |
| P42264 | IFTTLDLYALDLEPYRYSGVNLTGFRI LNVDNAHVSAIVEK      |
| P42264 | RFMNFIKEAQWEGLTGRIVFNKTSGLRTRDFDLDI ISLKEDG     |
| P42264 | ISLKEDGLEKVGWVSPADGLNI TEVAKGRGPNVTD SLTNRS     |
| P42264 | GVWSPADGLNITEVAKGRGPNVTD SLTNRS LIVTTLEEBPF     |
| P42264 | GLNITEVAKGRGPNVTD SLTNRS LIVTTLEEBPFV MFRKSD    |
| P42264 | AIDFSKPFMTLGVSILYRKPNGTNP SVFSFLNPLSPDIW MY     |
| Q63273 | PTPLLKEIRDDKVSTII DANASISHLVLRKASELGMTSAF       |
| Q63273 | ILHLDGIVEDSSNILGFMSFN TSHPFYPEFVRS LNMSWREN     |
| Q63273 | LGFSMFNTSHPFYPEFVRS LNMSWRENCEASTYP GPALSAA     |
| Q63273 | LSAALMFDVAVHVVV SAVRELNRSQEIGVKPLACTSANI WPH    |
| Q63273 | MVEYDGLTGRVEFNSKQRTNYTLRI LEKSRQGHREIGVWY       |
| Q63273 | TLRI LEKSRQGHREIGVWYSNRTLAMNATTL D INLSQTLAN    |
| Q63273 | KSRQGHREIGVWYSNRTLAMNATTL D INLSQTLANKTLVVT     |
| Q63273 | EIGVWYSNRTLAMNATTL D INLSQTLANKTLVVT T ILENPY   |
| Q63273 | NRTLAMNATTL D INLSQTLANKTLVVT T ILENPYVMRRPNF   |
| Q63273 | LRFRYRLRLVEDGLYGAPEPNGSWTGMV GELINRKADLAVA      |
| Q13255 | RVEAMFHTLDKINADPVL LPNITLGSEIRDSCWHS SVALEQ     |
| Q13255 | RVVPSDTLQARAMLDIVKRYNWTYV SAVHTEGNYGESGMDA      |
| Q13255 | QCRLPGHLEPNFKRICTGNESLEENYVQDSKMGFVINAI         |
| Q13255 | VHVG TWHEGVLNIDDYKI QMNKSGVRSVCSE PCLKGQIKV     |
| P23385 | RVEAMFHTLDKINADPVL LPNITLGSEIRDSCWHS SVALEQ     |
| P23385 | RVVPSDTLQARAMLDIVKRYNWTYV SAVHTEGNYGESGMDA      |
| P23385 | QCRLPGHLEPNFKKVC TGNESLEENYVQDSKMGFVINAI        |
| P23385 | VHVG TWHEGVLNIDDYKI QMNKSGMVR SVCSE PCLKGQIKV   |
| P31422 | RTVPPDFYQAKAMAEILRFFNWTYVSTVASEGDYGETGIEA       |
| P31422 | VVLFMRSDDSRELIAAANRVNASFTWVASD GWGAQESIVKG      |
| P31422 | VNAVYAMAHALHKMQRTLC PNTTKLCDAMKILDGK KLYKEY     |
| P31422 | CDAMKILDGK KLYKEYLLKINFTAPFPNKGADSVKFDTF        |
| P41594 | RVEAMLHTLERINS DPTLLPNITLGCEIRDSCWHS SVALEQ     |
| P41594 | RVVPSDAQARAMVDIVKRYNWTYV SAVHTEGNYGESGMEA       |
| P41594 | FWQHRFQCRLEGFPQENSKYNKTCNS SLTKTHHVQDSKMG       |
| P41594 | RFQCRLEGFPQENSKYNKTCNS SLTKTHHVQDSKMGFVIN       |

|        |                                             |
|--------|---------------------------------------------|
| P41594 | LCDAMKPTDGRKLLLESMLKTNFTGVSGDTILFDENGDSFGR  |
| P41594 | MEPPDIMHDYPSIREVYLICNTTNLGVVTPPLGYNGLLILSC  |
| P91685 | PGITIGVHILDTCRDTYALNQLQFVRASLNLDTSGYEC      |
| P91685 | NNLDTSGYECADGSSPQLRKNASSGPVFGVIGGSYSSVSLQ   |
| P91685 | RTVPPDTFQSVALVDILKNFNWSYVSTIHSEGSYGEYGIEA   |
| P91685 | VVLFTRAEDARRILQAAKRANLSQPFHWIASDGGWKQKLL    |
| P91685 | DTFNCVLTSLSVKPDTSNSANSTDNKIGVKAKTECDDSYRL   |
| P91685 | QACPDMANYDGKEFYNNYLLNVSFIDLAGESEVKFDRQGDGL  |
| P91685 | FDRQGDGLARYDILNYQRQENS SGYQYKVIKWFNGLQLNS   |
| P28799 | CCPRGFHCSADGRSCFQRSGNNSVGAIQCPDSQFECPDFST   |
| P28799 | PDGSTCCELP SGKYGCCPMPNATCCSDHLHCCPQDTVCDLI  |
| P28799 | HCCPQDTVCDLIQSKLSKENATDLLTKLPAHTVGDVKCD     |
| P28799 | APAHLSLPDPQALKRDVPCDNVSSCPSSDTCQLTSGEWGC    |
| P28799 | RSPHVGKDVCECGEGHFCNDQTCRDNRQGWACCPYRQGV     |
| Q92896 | REPENEISSDCNHLWNYKLNLTDPKFESVAREVCKSTIT     |
| Q92896 | CADEPVGKGYMVSCLVDHRGNI TEYQCHQYITKMTAII FSD |
| Q92896 | PVLYRKCQGDASRLCHTHGWNETSEFMPQGAVFSCLYRHAY   |
| Q92896 | LECLQDHLDDLVVECRDIVGNLLESEDIQIEALLMRACE     |
| Q92896 | LCPNIKKKVDVVICLSTTVRNDTLQEAKEHRVSLKCRQLR    |
| Q61543 | REPENEISSDCNHLWNYKLNLTDPKFESVAREVCKSTIS     |
| Q61543 | CAEEPVGKGYMVSCLVDHRGNI TEYQCHQYITKMTAII FSD |
| Q61543 | PVLYRKCQGDASRLCHTHGWNETSELMPGAVFSCLYRHAY    |
| Q61543 | LECLQDHLDDLAVECRDIVGNLLESEDIQIEALLMRACE     |
| Q61543 | LCPNIKKKVDVVICLSTTVRNDTLQEAKEHRVSLKCRQLR    |
| Q19459 | LCTSQTQPGFALSCLMEFTKNVTE TGKCHAFLARTEFLAFS  |
| Q19459 | GDIEAEGRTLHCLMEHAESRNETLKLGAQCLQAVQVVKVA    |
| Q8K297 | QLRHPRERTALWVATDHNTDNTSAILREWLVAVKGLYHSVE   |
| Q8K297 | FMDIDNLI TNPDTLSELLIAENKTVVAPMLDSRAAYSFWCG  |
| Q8K297 | ALHEQEIDCQLVEAVD GKAMNTSQVEAMGIQMLPGYRDPYH  |
| Q8NBJ5 | RLRHPRERTALWVATDHNDNTSTVLEREWLVAVKSLYHSVE   |
| Q8NBJ5 | FVDADNLI LNPDTLSELLIAENKTVVAPMLDSRAAYSFWCG  |
| Q8NBJ5 | ALQAQIEICRLVEAVD GKAMNTSQVEALGIQMLPGYRDPYH  |
| P10257 | MLWVTPVRAGTECRYGCRLNMTI IVEREDCHGSITITCA    |
| P10256 | FLCILLEPVEGSLMQPCQPINQTVSLEKEGCPCLVIQTPI    |
| P17809 | QFGYNTGVINAPQKVIIEEFYNQTNHRYGEP I PSTTLTLTW |
| P17809 | NTGVINAPQKVIIEEFYNQTNHRYGEP I PSTTLTLWLSLV  |
| P11166 | QFGYNTGVINAPQKVIIEEFYNQTVHRYGESILPTTLTLTW   |
| P32037 | QFGYNTGVINAPETILKDFLNYTLEERLEDLPSEGLLTALW   |
| P14672 | QFGYNTGVINAPQKVIIEEFYNQTNHRYGEP I PSTTLTLTW |
| P14142 | QFGYNTGVINAPQKVIIEEFYNQTNHRYGEP I PSTTLTLTW |
| P12257 | YPYLAWAYNPSAMDMGYALFNASGTVVRD GAYGYQNLFDTT  |

|        |                                              |
|--------|----------------------------------------------|
| P25092 | SLLFQPGWLSFSSQVSNCHNGSYEISVLMMGNSAFAPLK      |
| P25092 | EDAVNEGLEIVRGRLQAGLNVTVNATFMYS DGLIHNSGDC    |
| P25092 | NEGLEIVRGRLQAGLNVTVNATFMYS DGLIHNSGDCRSST    |
| P25092 | WKTNDLPFKTYSWSTS YVYKNGTEDEDCFWYLNALASVS Y   |
| P25092 | VAEDIVII LVDLFNDQYFEDNVTA PDYMKNVLVLTLS PGNS |
| P25092 | APDYMKNVLVLTLS PGNSLLNS SFSRNLSPTKRDFALAYLN  |
| P25092 | YLNGLLFGHMLKIFLENGENITTPKFAHAFRNLT FEGYDG    |
| P25092 | LYTSVDTKKYVLLTYDTHVNKTY PVDMSPTFTWKNSKLPN    |
| P56680 | CAKNCIMEGIPDYSQYGVTTNGTSLRLQHILPDGRVPSERV    |
| P56680 | ECAFEGVCDKNGCGWNNYRVNVTDY YGRGEEFKVNTLKFFT   |
| Q7Z9M7 | AILAALGCLAGSVLGHGQVQNFTINGQYNQGFILDY YQKQ    |
| P46237 | GIHGIRQKNGAGCGDWGQKPNATACPEASCAKNCILSGMD     |
| P46237 | ECGSSGICDKAGCGWNHNRINVTDFYGRGKQYKVDSTRKFT    |
| P46237 | LIELHRHYIQDNKVIESAVVNI SGPPKINFINDKYCAATGA   |
| P07987 | SVPLEERQACSSVWGQCGGQNWSPGCCASGSTCVYSNDYY     |
| P07987 | WLGWPANQDPAAQLFANVYKNASS PRALRGLATNVANYNGW   |
| P07987 | ASSPRALRGLATNVANYNGWNITS PPSYTQGNVYNEKLYI    |
| Q9C189 | ALRAAASAVAEVPSFQWLDNRNVTDTLLVETLSEIRAANQA    |
| Q4G148 | DQLHHSFKGRLDNWSFLQTFNYTLYPITFPSENAAEWKLF     |
| Q4G148 | DTDILFLRPVDDIWSLLKFNSTQIAAMAPEHEEPRIGWYN     |
| Q4G148 | RFARHPYYGKTGVNSGVMLNMTRMRKYFKNDMTTVRLQW      |
| P01898 | RAKGNEQS FHVSLRTL LGYYNQSESGSHTIQWMYGCKVGS D |
| P01898 | AGDGT FQK WASVVVPLGKEQNYTCHVYHEGLPEPLTLR WEP |
| P01899 | KAKGQEQWFRVSLRNLLGYYNQSAGGSHTLQQMSGCDLGS D   |
| P01899 | YKAYLEGECEWLRHRYLKNGNATLLRTDSPKAHVTHHPRSK    |
| P01899 | AGDGT FQK WASVVVPLGKEQNYTCRVYHEGLPEPLTLR WEP |
| P14426 | IAKGNEQSFRVDLRTL LRYYNQSEGGSHTIQRLSGCDVGS D  |
| P14426 | DRAYLEGTCEWLRRYLELGNATLLHTDSPKAHVTHHPRSK     |
| P14426 | AGDGT FQK WASVVVPLGKEQNYTCHVYHEGLPEPLTLR WEP |
| P01901 | KAKGNEQSFRVDLRTL LRYYNQSKGGSHTIQVISGCEVGS D  |
| P01901 | LRAYLEGTCEWLRRYLKNGNATLLRTDSPKAHVTHHSRPE     |
| P01902 | RAKSDQWFRVSLRTAQRYYNQSKGGSHTFQRMFGCDVGS D    |
| P01902 | YRAYLEGECEWLRRYLELGNETLLRTDSPKAHVTHHPRSQ     |
| P01902 | AGDGT FQK WAAVVVPLGKEQNYTCHVHHKGLPEPLTLR WKL |
| P04223 | IAKGNEQIFRVNLRTALRYYNQSAGGSHTFQRMYGCEVGS D   |
| P04223 | DRAYLEGTCEWLRRYLQGNATLPRTDSPKAHVTRHSRPE      |
| P01897 | IAKGQEQWFRVNLRTL LRYYNQSAGGHTLQWMYGCDVGS D   |
| P01897 | YRAYLEGECEWLRHRYLKNGNATLLRTDSPKAHVTHHPRSK    |
| P01897 | AGDGT FQK WASVVVPLGKEQNYTCRVYHEGLPEPLTLR WEP |
| P14434 | LLGQPNTLICFVDNIFPPVINITWLRNSKSVADGVYETSFF    |
| P23150 | GGLQEIATGKYNLEILIKDSNFTPAANEAPQATVFPKSPVL    |

|        |                                             |
|--------|---------------------------------------------|
| P23150 | LLGQPNTLICFVDNIFPPVINITWLRNSKSVTDGVYETSFL   |
| P01910 | GGLQNIATGKHNLLEILTKRSNSTPATNEAPQATVFPKSPVL  |
| P01910 | LLGQPNTLICFVDNIFPPVINITWLRNSKSVTDGVYETSFF   |
| Q8TDQ0 | LTTRGHGPAETQTLGSLPDINLTQISTLANELRDSRLANDL   |
| P18469 | LVRNSRPRFLEYSTSECHFYNQTQVRVFLERYIYNREEYVR   |
| P06343 | EGGNSERHFVHQFQPFQCYFTNGTQRIRLVIRYIYNREEYVR  |
| P69905 | HAGEYGAEALERMFSLFPPTTKTYFPHFDLSHGSAQVKGHGK  |
| P69905 | TYFPHFDLSHGSAQVKGHGKVDALTNVAHVDDMPNALS      |
| P68871 | GDLSTPDAVMGNPKVKAHGKKVLGAFSDGLAHLNKGTFFA    |
| P68871 | PENFRLLGNVLVCVLAHHFGKEFTPPVQAAYQKVAVGANA    |
| P03141 | RQPTPISPPLRDSHPQAMQWNSTAFHQTLQDPRVRGLYLPA   |
| P03141 | TPAQGNSMFPSCCCTKPTDGNCTCIPSPSSWAFKYLWEWA    |
| P03138 | RQPTPLSPPLRNTHPQAMQWNSTTFHQTLQDPRVRGLYFPA   |
| P03138 | TTAQGTSMPYSCCCTKPSDGNCTCIPSPSSWAFKYLWEWA    |
| P80960 | VDSLTEEEILTLQSVRELQNDSSHEHGFQSIASFHGSPPFLC  |
| P80960 | VELMREPLQPPAQTSAITNPNVTRAHSTPKSLFNRYQLAGY   |
| P83040 | QEDLPAFFNDEIWDPLFHANFTNPFNGADIDFNHQKIARD    |
| P84293 | DMLLFEERIQDAIAHGYLRYNGSTINIRDNHGIDVLGDVFE   |
| P04254 | NSEVIDKAYSAMTKQKGTFFNVSTGTGKKNREQRVAYFGED   |
| P10787 | NSEVIDKAYSAMTKQKGTFFNVSTGTGKKNREQRVAYFGED   |
| P12031 | AINLMRKPLQPFQDKKLNPRNITNIYSRPAFTFYRNHFHY    |
| P80096 | TYIERLNHKKFSFLILVTNNNTEVLATVRIFAWPLRDNG     |
| P56825 | MPTFKLNFDSHFTIKTVVAQNGTELPESILPEATIDRIPPS   |
| O61363 | KSLGIPLDGNYYVHADVTEINGTLLPDGTIPRPTVSYIPHN   |
| O61363 | AELGVDMAEYSINLQINDINGTALPPTSIPDPVIFSPGK     |
| O61363 | PYNEANCALPLLNVPMPRPFSTANTANHDRMTLTHSAPNDVFD |
| O61363 | KLLGLNQNSHFRGVTEVTAVNGSSINSDIFPHPTIIVYFKQ   |
| O61363 | SDMNLAFDSAFTIKTKLVAQNGTELPASILPEATVIRIPPS   |
| O61363 | PGTKLPRLLADSDYYDAWTDNVTENPFLRGYIKTEDTYTVR   |
| O61363 | DNGYQKIASYHGIPLSCHYENGTAACCQHGMMVTFPNWHRL   |
| P56823 | RLTVSETENREALRRIKADNGSDGFQSIASFHGSPPGCEH    |
| P56823 | SDGFQSIASFHGSPPGCEHENHVSACCIHGMANFPQWHRLY   |
| P56823 | SKLHLRPDSEYHFNIHIVSVNGTELDLHLSRPTVQFVPGV    |
| P80888 | NSEVIDKAYSAMTKHKEGTFNMSFTGTQKNREQRVAYFGQD   |
| Q9D1N2 | RDRAPLQCYFCQVLHSGESCNTQSCSSSKPFCITLVSHSG    |
| Q9ULI3 | GSADAANKHWPESENTEAHVENITFYQNQEDFSTVSSKEGVM  |
| Q9ULI3 | KEGVMVQTSKGSHAASDAPENLTLAETADARGRSGSSSRT    |
| Q9ULI3 | LTLAETADARGRSGSSSRTNFTIIPVGYSLIATALTSQS     |
| Q9ULI3 | AASSPLLDLSSSESTEKLNNSSTGLQSSSVSQTKTMHVATV   |
| Q9ULI3 | VSRVAPMRGGEITAHWLLTNSSTTSADVTSASYPEGVNA     |
| Q9ULI3 | TALGDRSYSESSSTSSSESLNSSAPRGRSIAIGISYGQVRG   |

|        |                                             |
|--------|---------------------------------------------|
| Q9ULI3 | ISNSSHSEYSSFFHAQTERSNISSYDGEYAQPSTESPLVHT   |
| Q9ULI3 | ASRENAVVISLQTTFSLASNVTLFDLADRMQKCVNSCKSS    |
| P0C0V9 | LCPKFSSKSSSSMFLSLHWNHSSFVSYDYFNCVGEKVFYE    |
| P0C0V9 | GSTESHVCDYLFMEPGTYNASTVGKFLVYPTKSYCMDTM     |
| P0C0V9 | ASTVGKFLVYPTKSYCMDTMNITVPVQAVQSIWSEQYASDD   |
| P0C0V9 | QYASDDAIGQACKAPYCI FYNKTTPYTVTNGSDANHGDEDEV |
| P0C0V9 | QACKAPYCI FYNKTTPYTVTNGSDANHGDEVRMMMQGLLR   |
| P0C0V9 | GSDANHGDEVRMMMQGLLRNSSCISPQGSTPLALYSTEMI    |
| P15776 | WFLFGDSRSDCNHVNTNFRNYSYMDLNPALCDSGKISSKA    |
| P15776 | KISSKAGNSIFRSFHFTDFYNYTGEGQQIIFYEGVNFTPYH   |
| P15776 | VYKNMAVYRSLTFVNVVYVYNGSAQSTALCKSGSLVLNPA    |
| P15776 | KYYDDSQYFNKDTGVIYGLNSTETITTFDFNCHYLVLPS     |
| P15776 | KDFTPVQVDSRWNNARQSDNMTAVACQPPYCYFRNSTTNY    |
| P15776 | ARQSDNMTAVACQPPYCYFRNSTTNYVGVYDINHGDAGFTS   |
| P15776 | LSGLLYDSFCFSQQGVFRYDNVSSVWPLYSYGRCPTAADIN   |
| P31614 | RISAKSGNSLFRSFHFIDFYNSGEGDQVI FYEGVNFSPSH   |
| P31614 | ARFYARVYEKMAQYRSLSFVNVSYAYGGNAKPTSICKDKTL   |
| P31614 | NPTFISKESNYVDYIYSEANFTLQGCDEFIVPLCVFNHGS    |
| P31614 | KYYTDSQSYNMDTGVLVGFNSTLDVGNTPQNLDLTCRY      |
| P31614 | AICLRKPKSFMFPVQVVDNRWNSRQSDNMTAVACQLPYCFF   |
| P31614 | KSFMPVQVVDNRWNSRQSDNMTAVACQLPYCFFRNTSADY    |
| P31614 | TRQSDNMTAVACQLPYCFFRNTSADYSGGTHDVHHGDFHFR   |
| P31614 | THDVHHGDFHFRQLLSGLLYNVSCIAQQGAFVYNNVSSSWP   |
| P31614 | LSGLLYNVSCIAQQGAFVYNNVSSSWPAYGYGHCPTAANIG   |
| P03459 | LVAVIPTNADKICLGHHAVSNGTKVNTLTERGVEVVNATET   |
| P03459 | HAVSNGTKVNTLTERGVEVVNATEVVERTNIPKICSKGKRT   |
| P03459 | RGSGGIDKETMGFTYSGIRTNGTTSACRRSGSSFYAEMEWL   |
| P03459 | CRRSGSFYAEMEWLLSNTDNASFQMTKSYKNTRRESALI     |
| P03459 | RPQINGQSGRIDFHWLILDPNDTVTFSFNGAFIAPNRASFL   |
| P03459 | QFELIDNEFTEVEKQIGNLINWTKDFITEVWSYNAELLVAM   |
| P03459 | SEMNKLYERVRKQLRENAEEDGTGCFEIFHKCDDDCMASIR   |
| P03459 | GTGCFEIFHKCDDDCMASIRNNTYDHSKYREEAMQNRIQID   |
| P03437 | IIALSYIFCLALGQDLPGNDNSTATLCLGHHAVPNGTLVKT   |
| P03437 | DLPGNDNSTATLCLGHHAVPNGTLVKTITDDQIEVTNATEL   |
| P03437 | HAVPNGTLVKTITDDQIEVTNATELVQSSSTGKICNNPHRI   |
| P03437 | GIDCTLIDALLGDPHCDVFQNETWDLFVERS KAFSNCYPYD  |
| P03437 | SGFFSRLNWLTKSGSTYPVLNVTMPNNDNFDKLYIWGIHHP   |
| P03437 | SSIMRSDAPIIDTCISECITPNGSIPNDKPFQNVNKITYGAC  |
| P03437 | GNGCFKIYHKCDNACIESIRNGTYDHDVYRDEALNNRFQIK   |
| P07975 | LLVLGLTEAEKIKICLQKQVNSSFLHNGFGGNLYATEEKR    |
| P07975 | ATEEKRMFELVKPKAGASVLNQSTWIGFGDSRTDKSNSAFP   |

|        |                                                |
|--------|------------------------------------------------|
| P07975 | KVFEYEGVNWS PHAAINCYRKNWTDIKLNFQKNIYELASQSH    |
| P07975 | RELLSGLDYEARCISQSGWVNETS PFTEKYLLPPKFGRCPL     |
| P02790 | PDVTERCS DGWSFDATTLDDNGTMLFFKGEFVWKSHKWDRE     |
| P02790 | EFWFDLATGTMKERSWPAVGNCSALRWLGRIYCFQGNQFL       |
| P02790 | YPRDVRDYFMPCPGRGHGHRNGTGHGNS THHGPEYMRCSPH     |
| P02790 | DYFMPCPGRGHGHRNGTGHGNS THHGPEYMRCSPHLVLSAL     |
| Q91X72 | WSLAVASPLPTANGRVAEVENGTKPDS DVPEHCLDTWSFDA     |
| Q91X72 | SDVPEHCLDTWSFDAATMDHNGTMLFFKGEFVWRGHSGTRE      |
| Q91X72 | KWFWDFATRTQKERSWSTVGNCTAALRWLERYYCFQGNKFL      |
| Q91X72 | PLDARDYFVSCPGRGHGRPRNGTAHGNS THPMHSRCS PDPG    |
| Q91X72 | YFVSCPGRGHGRPRNGTAHGNS THPMHSRCS PDGLTALLS     |
| Q91X72 | EKVDGALCLDKSLGPNTCSSNGSSLYFIHGPNLYCYSSIDK      |
| P20058 | WGLCWSLATVNSVPLTSAHGNVTEGESGTPKPEADVIEQCSD     |
| P20058 | ADVIEQCSDGWSFDATTLDDNGTMLFFKDE FVWKS HRGIRE    |
| P20058 | KWFWDLTTGTTKERSWPAVGNCTSALRWLGRIYCFQGNQFL      |
| P20058 | LDVRDYFLSCPGRGHRSSHRNSTQHGHSTRCDPDLVLSAM       |
| P05546 | EKGGETAQSA DPQWEQLNNKNLSMPLLPADPHKENTVTNDW     |
| P05546 | GLKGETHEQVHSILHFKDFVNASSKYEITTIHNLFRKLTHR      |
| P05546 | KTLEAQLTPRVVERWQKSMTNRTREVLLPKFKLEKKNYLVE      |
| P49182 | SLITFMCI GSKGLAEQLT NENLTTSFLPANFHKENTVTNDW    |
| P49182 | GLRGETHEEVH SVLHFRDFVNASSKYEVTTIHNLFRKLTHR     |
| P49182 | KTLEAQLTPQVVERWQKSMTNRTREVLLPKFKLEKKNYLVE      |
| P49182 | YNLVEVLKSMGITKLFNKNGMSGISDQRIADL FKHQSTI       |
| P05981 | EMGFLRALTHSEL DVRTAGANGTS GFFCVDEGRLPHTQRLL    |
| Q22492 | DRWSVGGVWPLPKKIVYGSKNRTITYDKIGIDLGDKKDCDI      |
| Q22492 | VECWERNKKIRKFMEKGFNDTVLLENYFFEKLYKIVENL        |
| Q22492 | NAVIHIWKGN THEE IYEQVKNITSQNFPPVIVSACWYLYNIK   |
| Q22492 | EIRGTAPNSRYYCDPTNFNGTVAQKELVWGGIAAIW GEL       |
| P06865 | LVVSVVTPGCNQLPTLESVENYTLTINDQCLLLSETVWGA       |
| P06865 | RGLETFSQLVWKS AEGTFFINKTEIEDFFRFPHRGLLLDTS     |
| P06865 | TPCYSGSEPSGTFGPVNPSLNNTYEFMSTFFLEVSSVFPDF      |
| P07686 | KMTPNLLH LAPENFYI SHSPNSTAGPSC TLL EEA FRRYHGY |
| P07686 | TQVQQLLVSITLQSECDAFPNISSDES YTLVKEPVAVLKA      |
| P07686 | RGLETFSQLVYQDSYGTFTINESTIIDS PRF SHRGI LIDTS   |
| P07686 | KDLLTPCYSRQNKLDSFGPINPTLNTTYSFLTTFKEI SEV      |
| P07686 | TPCYSRQNKLDSFGPINPTLNTTYSFLTTFKEI SEVFPDQ      |
| Q9W568 | QLTMISSCSNISKWTNLHVRNMTVEDMDLSNPIFRSLQSLA      |
| Q9W568 | DMDLSNPIFRSLQSLAVTDGNI TRLVNAFPRLSALKCLNIS     |
| Q9W568 | DGNI TRLVNAFPRLSALKCLNISNNNISEIHSRAVKDVPHL     |
| Q9W568 | TRLVNAFPRLSALKCLNISNNNISEIHSRAVKDVPHLEFFG      |
| Q9W568 | RLVNAFPRLSALKCLNISNNNISEIHSRAVKDVPHLEFFGM      |

|        |                                            |
|--------|--------------------------------------------|
| P04441 | ATPLLMRPMMDNMLLGPVKNVTKYGNMTQDHVMHLLTRSG   |
| P04441 | RPMSMDNMLLGPVKNVTKYGNMTQDHVMHLLTRSGPLEYPO  |
| P04233 | ATPLLMQALPMGALPQGPMQNATKYGNMTEHDHVMHLLQNAD |
| P04233 | QALPMGALPQGPMQNATKYGNMTEHDHVMHLLQNADPLKVYP |
| P04233 | GNYPQLQCYGSIQYWCWVFPNGTEVPNTRSRGHHNCSESE   |
| Q04756 | LLPRGFQPPGGNRTESEPEPNATATPAIPTILVTSVTSETP  |
| Q04756 | PPGFAGRLCNIEPDERCF LGNGTYRGVASTSASGLSCLAW  |
| Q04756 | CFSSHPPRDSVSVVLGQHFFNRRTDVTQTFGIEKYIPYTY   |
| Q04756 | DVTQTFGIEKYIPYTYLVFNPSDHDVLIIRLKKKGDRCAT   |
| Q04756 | GSTFPAGHKCQIAGWGHLDENVSGYSSSLREALVPLVADHK  |
| Q9R098 | FLLLLLLLVVPRGAQPQAGRNHTEPPGPNVTATPVTPTIPV  |
| Q9R098 | VVPRGAQPQAGRNHTEPPGPNVTATPVTPTIPVISGNVSTS  |
| Q9R098 | PPGPNVTATPVTPTIPVISGNVSTSTESAPAAETEGPQSER  |
| Q9R098 | PLGYAGRFCNIVPTEHCF LGNGTEYRGVASTAASGLSCLAW |
| Q9R098 | CFANSPRDSITVVLGQHFFNRRTDVTQTFGIEKYVPTYTY   |
| Q9R098 | GSSFPTGHKCQIAGWGHMDENVSSYSNSLLEALVPLVADHK  |
| P26927 | DAEECAGRCGPLMDCRAFHYNVSSHGCQLLPWTQHSPhTRL  |
| P26927 | QEATTVSCFRGKGEYRGYRGTANTTAGVPCQRWDAQIPHQR  |
| P26927 | VVPPGTKEIAGWGETKGTGNDTVLNVALLNVISNQECNIK   |
| P14210 | LDPHTRWEYCAIKTCADNTMNDTDVPLETTECIQGGEGYR   |
| P14210 | NCDMSHGQDCYRGNKNYMGNLSQTRSGLTCSMWDKNMEDL   |
| P14210 | AWLGIDHVGHRGDEKCKQVLNVSQLVYGPESDLVLMKLAR   |
| P14210 | HLYIMGNEKCSQHHRGKVTLNESEICAGAEEKIGSPCEGDY  |
| Q68CP4 | HAELKMDQALLIHNELLWTNLTVYWKSECCYHCLFQVLVN   |
| Q68CP4 | GKPSAAAASVSTQHGSILQLNDTLEEKEVCRLEYRFGEFGN  |
| Q68CP4 | NDTLEEKEVCRLEYRFGEFGNYSLVKNIHNGVSEIACDLA   |
| Q3UDW8 | AKPSVAPVSVSTQHGSILQVNSTSEERAACRLEYKFGEFGN  |
| Q3UDW8 | NSTSEERAACRLEYKFGEFGNYSLVQHASSGANKIACDII   |
| Q96QV1 | CLRSDSPGLGRLENKIFSVTNNTECGKLLLEEIKCALCSPHS |
| Q96QV1 | DVDTDMCNVPYSIPRSNPHFNSTNQPEVFAHGLHDPGRCA   |
| Q96QV1 | HGLHDPGRCAVDRHPTDININLTILCSDSNGKNRSSARILQ  |
| Q96QV1 | RHPTDININLTILCSDSNGKNRSSARILQIIKGDYSESEPS  |
| Q09101 | IGPEPEPLADQDLKDLQQYGNQSSARVALLWQRVKKRSGK   |
| Q09101 | PLYKSCHVNRIPSHLLSYRNI SVTPIPPNRGWRKTRLSKS  |
| Q09101 | CSNGLWAPRMPSCVPTTVLTNYSEDSAPSIRIKIFNGSHSF  |
| Q09101 | TTVLTNYSEDSAPSIRIKIFNGSHSFEPGVMVPPHSTVL    |
| Q09101 | KLQRAHYECPGFRLDGAWNATCLASGNWSSPTPTCHAIQ    |
| Q09101 | HAIQCPRELEDDPHLSLIELNTSAWGRAVFKCQWGFKLTGP  |
| Q84TI7 | LISITERQNLQRDPINFNVLNITLEVISAYGNVGFTTGYSC  |
| P13747 | SARDAQIFRVNLRTRGYYNQSEAGSHTLQWMMHGCELGPD   |
| Q967F4 | LQPSIFSTNFEVEDGYRIITNTTVTQFHGELFELFLNVKEQ  |

|        |                                             |
|--------|---------------------------------------------|
| Q967F4 | VHFLKSKKSIKAFASAI PANSTVFDVEKRNLSEPLLFHLE   |
| Q967F4 | IAKFASAI PANSTVFDVEKRNLSEPLLFHLEEPSRFFKIDQ  |
| Q967F4 | PMTSSRSRRHLDDIVFRI PENTTMEDIEKKDKMI PLFAGET |
| Q967F4 | YERGDYRISAQAMDLSPSDNTTSQLSEVAILEILADERPP    |
| Q967F4 | NVPTFTRPLYTAQVREDI PLNQTI LKVTAVDKDTGDNSRIT |
| Q967F4 | TAVDKDTGDNSRITYSVDNHNFSINSNGEISAKVRLDADQL   |
| Q967F4 | SAKVRLDADQLNERHFVYRFNVTARDHGEPVLSSSAMIHI    |
| Q967F4 | LVKLRHGVSAAADLAEAEENFINLTVIVQDDGSCCVYPSKTHT |
| Q967F4 | NGNEWVEVVIMEGLDYEQVNNYTLTLTATDMTSRVASTKTF   |
| Q967F4 | LDFEASDQYHLVLIASDGRHNATTNVYIHIEDVNDNAPQFE   |
| Q967F4 | EFII EVRANDRGVPSREGFANVTIKVTDMDNAPFFEKTRY   |
| Q967F4 | PSFKYSQYLNVI FNANGDGGNGSMTITPLQEFDREAPVPGK  |
| Q967F4 | CDAGCQTLNSADYDGI VVSANSTVIVGVNATSRDDCTCPVW  |
| Q967F4 | NSADYDGI VVSANSTVIVGVNATSRDDCTCPVWRAPPACQH  |
| Q967F4 | RSFGNGFAWYKMPACTSLNISFSFMTTQSDALLFYNGPL     |
| Q967F4 | FMTTQSDALLFYNGPLETLRNDTHIEYSYDIFIQLRGGRIS   |
| Q967F4 | GTGGRRARQELRVSEVLLKENASYWLQFTRNPTRASLSIDN   |
| Q95460 | LLRGWQQMFKVELKRLQRHYNHSGSHTYQRMIGCELLEDGS   |
| P52708 | NKAANI LFAESPAGVVFSYSNTSSDLSMGDDKMAQDTYTFLL |
| P52708 | AVFNSINYLNLPVQ TALHANVSGIVEY PWTVCSNTIFDQW  |
| P04853 | IISARQGYSMKEYSMTVEALNMSSREVKESLTSIRQEVIA    |
| P04853 | TDAYPLSPDAANVATVTLYANTSRVNPTIMYSNTTNIINML   |
| P04853 | VATVTLYANTSRVNPTIMYSNTTNIINMLRIKDVQLEAAYT   |
| P04850 | NDNRYINGINQFYFSIAEGRNLTGPLLNMPSFIPTATTPE    |
| P04850 | ERDDYFSAAPPEQR IIIMYYNDTIVERI INPPGVLDVWATL |
| P04850 | FTGSYLNATQQRINPTMY IANNTQIISSQQFGSSGQEAAYG  |
| P07354 | NGPRLLVVAEQAKI FSQRGGNVTL PCKFYHEHTSTAGSGTH |
| P03994 | NGPRLLVEAEQAKVFSHRGGNVTL PCKFYRDP TAFGSGIHK |
| Q6YGZ1 | VEWPFQELLLLREYQKEFKNSTY SRSSVDMLYSFAKCSGL   |
| Q6YGZ1 | SGLDLIFGLNALLRTPDLRWNS SNAQLLLDYCSSKGYNISW  |
| Q6YGZ1 | LRWNS SNAQLLLDYCSSKGYNI SWELGNEPNSFWKKAHILI |
| Q6YGZ1 | NVYHPRYQEGDLTLVVLNLHNVTKHLKVPPLFRKPVDTYL    |
| Q9Y251 | LEWPYQEQLLREHYQKFKNSTY SRSSVDVLYTFANC SGL   |
| Q9Y251 | KKFKNSTY SRSSVDVLYTFANC SGLDLIFGLNALLRTADLQ |
| Q9Y251 | SGLDLIFGLNALLRTADLQWNS SNAQLLLDYCSSKGYNISW  |
| Q9Y251 | LQWNS SNAQLLLDYCSSKGYNI SWELGNEPNSFLKKADIFI |
| Q9Y251 | ISWELGNEPNSFLKKADIFINGSQLGEDFIQLHLLRKSTF    |
| Q9Y251 | NTDNPRYREGDLTYA INLHNVTKYLRPLYPFSNKQVDKYL   |
| P19006 | GGSVDAKGSFPWQAKMVSHHNLTS GATLINEQWLLTTAKNL  |
| P19006 | DYAEVGRIGYVSGWGRNSNFNFT ELLKYVMLPVADQDKCVQ  |
| P00738 | GGHLDAKGSFPWQAKMVSHHNLTT GATLINEQWLLTTAKNL  |



|        |                                             |
|--------|---------------------------------------------|
| P00738 | TGATLINEQWLLTTAKNLFNLHSEENATAKDIAPTLTLYVGK  |
| P00738 | LINEQWLLTTAKNLFNLHSEENATAKDIAPTLTLYVGKQLV   |
| P00738 | LTLYVGKQLVEIEKVVLHPNYSQVDIGLIKQKQVSVNER     |
| Q61646 | TGATLISDQWLLTTAKNLFNLHSETASAKDITPTLTLTYVGK  |
| Q61646 | LTLYVGKNQVEIEKVVLHPNHSVVDIGLIKQKQVSVNER     |
| Q61646 | RLKYVMLPVADQDKCVVHYENSTVPEKKNLTSVGVQPILN    |
| Q61646 | VADQDKCVVHYENSTVPEKKNLTSVGVQPILNEHTFCAGL    |
| Q8SPS7 | GGSLDAKGSFPWQAKMISHHNLTSGATLINEQWLLTTAKNL   |
| Q8SPS7 | TLINEQWLLTTAKNLRGLGHKNDTKAKDIAPTLRLTYVGKQVE |
| Q8SPS7 | RLTYVGKQVEIEKVIHFDPNSTVDIGLIKQKQVSVNERV     |
| Q8SPS7 | DYVNVGLVGYVSGWGRNANLNFTEHLKYVMLPVADQEKCVQ   |
| P90859 | VFTTFRSQPELQKLEIEELRNNTLSSAYGLNIEALSGHTF    |
| P33433 | YLVEDCPVLSRKHWDCELVNTVIGQCKLAGPEDLSVNDF     |
| P33433 | VTVIGQCKLAGPEDLSVNDFNCTTSSVSSALTNMRARGGEG   |
| P33433 | TNMRARGGEGTSYFLDFSVRNCSSHHFPRHHIFGFCRADLF   |
| P33433 | DHGHPHESYNFRCPPPLEHKNHSDSPPFQARAPLPPPPGL    |
| P04196 | RDGYLFQLLRIADAHLDRENTTVYYLVLDVQESDCSVLSR    |
| P04196 | CKVIATRHSHEQDLRVIDFNCTTSSVSSALANTKDSPVLI    |
| P04196 | CSSQHATFGTNGAQRHSHNNSSDLHPKHHSHEQHPHGH      |
| P04196 | SSQHATFGTNGAQRHSHNNSSDLHPKHHSHEQHPHGH       |
| Q9ESB3 | SRWQSEIVIGQCKVIATRYSNESQDLVNGYNCTTSSVSSA    |
| Q9ESB3 | CKVIATRYSNESQDLVNGYNCTTSSVSSALRNTKDSPVLL    |
| Q9ESB3 | RVIRARGGERTNYVEFMRNCSTQHFRSPLVFGFCRALL      |
| Q9ESB3 | RLQEGALPQLPPGYPPHSGANRTHRPSYNHSCNEHPCHGHR   |
| Q9ESB3 | QLPPGYPPHSGANRTHRPSYNHSCNEHPCHGHRPHGHPHS    |
| P11147 | YSCVGVFHGKVEI IANDQGNRTTPSYVAFDTERLIGDAA    |
| Q08169 | LLKDPNGNVVARNGGVPQLGNLTKHLQVFRDHLINQIPDKS   |
| Q08169 | KMSWLFESDVLPSVYLRWNLTSGERVGLVGGVKEALRI      |
| P49370 | LLSLKDGKYYKRNNGVPEGNI TIHLQKFIENLDKIYPNRN   |
| P49370 | NITIHQKFIENLDKIYPNRNFSGIGVIDFERWRPIFRQNW    |
| P49370 | DFERWRPIFRQNWGNMKIHKNFSDLVRNEHPTWKKMIEL     |
| Q5D7H4 | GETISLFYDPGNFPMVLLKNGTYEIRNEGVPQKGNLTIHL    |
| Q5D7H4 | MVLLKNGTYEIRNEGVPQKGNLTIHLEQFTKELDEIYPKKI   |
| P01815 | PPGKLEWLARIDWDDKYYNTSLETRLTISKDTSRNQVVL     |
| P01763 | GSGSTIYYADSVKGRFTISRNBKNSLYLQMSLRAEDTAV     |
| P01773 | GGGVVQAGTSLRLSCTASAFNLSYAMHWVRQAPGKGLZW     |
| P01756 | KWVKQSHGKLEWIGDINPNNGGTSYNQKFKGKATLTVDKS    |
| Q12794 | LGTYPYTPTGEPVFGGLPQNASLIAHLARTFQDILAAIPA    |
| Q12794 | RGLWGFYGFPCYNYDFLSPNYTGQCPSGIRAQNDQLGLWL    |
| Q12794 | KESCQAIKEYMDTTLGPFILNVTSGALLCSQALCSGHGRCV   |
| Q2M3T9 | RLNLKMFVIGSPLAKARGQNVTI FYVNRLGYYPWYTSQGV   |

|        |                                              |
|--------|----------------------------------------------|
| Q2M3T9 | LGYYPWYTSQGVPIINGGLPQNI SLQVHLEKADQDINYYIPA  |
| Q2M3T9 | WNSKDVYRQKSRKLISDMGKNVSA TDIEYLAKVTFEESAKA   |
| Q2M3T9 | STIGESAALGAAGIVIWGD MNLTASKANCTKVQFVSSDLG    |
| I0CME7 | FNHPDNDGETQRILK KHRPENFTGLGVLD FETWRAIYSTNF  |
| I0CME7 | DFETWRAIYSTNFGPMTIYQNESVKLVKEQHPDYDQKCLK     |
| I0CME7 | QWQCQQLQEHIRTVLG PLVKNVTQMMTDCSRAICEGHGRVC   |
| O35632 | PLDLRAF DVKATPNEGFFNQNI TTFYIDRLGLYPRFDAAGT  |
| O35632 | LGlyPRFDAAGTSVHGGV FQNGSLCAHL PMLKESVERYIQT  |
| O35632 | METCQYLKNYLTQLLVPY IVNVSWATQYCSWTQCHGHGRVC   |
| O35632 | CHGHGR CVRRNPSANTFLHLNASS FRLVPGHTPSEPQLRPE  |
| O35632 | QCYL GWGGEQCQRNYKGAAGNASRAWAGSHL TSLGLVAVA   |
| Q7Z139 | PWWT DALYWLPRGVSWS DMYNKTTEPGYMYPHYSHLWMTVL  |
| Q9JKR6 | RFQIS PQLQFSPEEVLGMV LNYSRSLAEDFAEQPIKDAVIT  |
| Q9JKR6 | LINDNTAT ALSYGVFRRKD INSTAQNVMFYDMGSGSTVCTI  |
| Q9JKR6 | INYGDLGFLGPEDLRVFGSQNL TTVKLGKVGESFKKYPDYE   |
| Q9JKR6 | KLGN TISSLFGGGTSSDAKENGTD AVQEEEE SPAEGSKDEP |
| Q9JKR6 | FRVEERRK WPERLSALDNLLNHSS IFLKGARLIPEMDQVFT  |
| Q9JKR6 | IPEMDQV FTEVEMTTLEKVIN D TWAWKNATLAEQAKLPATE |
| Q9JKR6 | FTEVEMTTLEKVIN D TWAWKNATLAEQAKLPATEKPVLLSK  |
| Q9JKR6 | VQYLLNKAKFTKPRPRPKDKNGT RAEPLNASAGDQEEKVI    |
| Q9JKR6 | FTKPRPRPKDKNGT RAEPLNASAGDQEEKVI PPAGQTEEA   |
| Q9Y4L1 | HFQISSQLQFSPEEVLGMV LNYSRSLAEDFAEQPIKDAVIT   |
| Q9Y4L1 | LINDNTAT ALSYGVFRRKD INTTAQNI MFYDMGSGSTVCTI |
| Q9Y4L1 | INYGDLGFLGPEDLRVFGSQNL TTVKLGKVGDSFKKYPDYE   |
| Q9Y4L1 | KLGN TISSLFGGGTTPDAKENGTD TVQEEEE SPAEGSKDEP |
| Q9Y4L1 | FRVEERRK WPERLSALDNLLNHSSMFLKGARLIPEMDQIFT   |
| Q9Y4L1 | IPEMDQI FTEVEMTTLEKVIN ETWAWKNATLAEQAKLPATE  |
| Q9Y4L1 | FTEVEMTTLEKVIN ETWAWKNATLAEQAKLPATEKPVLLSK   |
| Q9Y4L1 | VQYLLNKAKFTKPRPRPKDKNGT RAEPLNASASDQGEKVI    |
| Q9Y4L1 | FTKPRPRPKDKNGT RAEPLNASASDQGEKVI PPAGQTEDA   |
| Q14627 | FDLNKG IEAKIHTLLPWQCTNGSEVQSSWAETTYWIS PQGI  |
| Q14627 | IGCRFPYLEASDYKDFYI CVNGSSENKPIRSSYFTFQLQNI   |
| Q14627 | FDYEIE IREDDTTLV TATVENETY TLKTTNETRQLCFVVR  |
| Q14627 | DDTTLV TATVENETY TLKTTNETRQLCFVVR SKVNIYCSDD |
| Q96F46 | GGASLRLLDHRALVCSQPGLNCTVKNSTCLDDSWIHPRNLT    |
| Q96F46 | RLLDHRALVCSQPGLNCTVKNSTCLDDSWIHPRNLT PSSPK   |
| Q96F46 | GLNCTVKNSTCLDDSWIHPRNLT PSSPKDLQIQLHFAHTQQ   |
| Q96F46 | EHARMKV TTPCMSSGSLWDPNI TVETLEAHQLRVSF TLWNE |
| Q96F46 | PNITVETLEAHQLRVSF TLWNESTHYQILLTSFPHMENHSC   |
| Q96F46 | TLWNESTHYQILLTSFPHMENHSC FEHMHHPAPRPEEFHQ    |
| Q96F46 | CFEHMHHPAPRPEEFHQRSNVTL TLRNLKGCRRHQVQIQP    |

|        |                                             |
|--------|---------------------------------------------|
| O95998 | PAAKQCPALEVTWPEVEVPLNGTSLSLSCVACSRFPNFSILY  |
| O95998 | VEVPLNGTSLSLSCVACSRFPNFSILYWLGNFSFIEHLPGRRL |
| O95998 | SLSCVACSRFPNFSILYWLGNFSFIEHLPGRLWEGSTSRER   |
| O95998 | GTQLCKALVLEQLTPALHSTNFSCVLVDPEQVVRHVLAQ     |
| P62757 | SCQLGYSQGPCLGMFKRYFYNGTSMACETFYYGGCMGNGNN   |
| P62756 | SCQLGYSQGPCLGMFKRYFYNGTSMACETFYYGGCMGNGNN   |
| P04365 | SCQLDHAQGPCLGMISRYFYNGTSMACETFYYGGCLGNGNN   |
| P17936 | PSPDEARPLQALLDGRGLCVNASAVSRLRAYLLPAPPAGN    |
| P17936 | NASAVSRLRAYLLPAPPAGNASESEEDRSAGSVESPSVSS    |
| P17936 | HAKDSQRYKVDYESQSTDTQNFSSKRETEYGPCRREMED     |
| Q28893 | EIEAIQESLQPSDKDEGDHPNNSFSPCSAHRKCLQKHLAK    |
| P00976 | LCQLPQARGPCKAALLRYFYNSTNACEPFTYGGCQGNBN     |
| P05155 | LTLLTLLLLLAGDRASSNPATSSSSQDPESLQDRGEGKV     |
| P05155 | VISKMLFVEPILEVSSLPTTNSATKITANTTDEPTTQ       |
| P05155 | EVSSLPTTNSATKITANTTDEPTTQPTTEPTTQPTIQ       |
| P05155 | VTSVSQIFHSPDLAIRDTFVNASRTLYSSSPRVLNNSDAN    |
| P05155 | RDTFVNASRTLYSSSPRVLNNSDANLELINTWVAKNTNKK    |
| P05155 | NNSDANLELINTWVAKNTNKKISRLDLSLPSDTRLVLLNA    |
| P05155 | VAHFIDQTLKAKVGLQLSHNLSLVLVLPQNLKHRLEDMEQ    |
| P97290 | PEPTVLPSTWPTTSVAITITNDTMGKVANESFSQHSQPAAQ   |
| P97290 | TWPTTSVAITITNDTMGKVANESFSQHSQPAQLPTDSPGQ    |
| P97290 | SQHSQPAQLPTDSPGQPLNSSSQPSTASDLPTQATTEPF     |
| P97290 | VTSVSQIFHSPDLAIRDTYVNASQSLYGSSPRVLGPDSAAN   |
| P97290 | VAQFDDHTLKAKVGLQLSHNLSFVIVVPVFPKHQLKDVEK    |
| P05362 | YWTPERVELAPLPSWQPVGKNLTLRCQVEGGAPRANLTVVL   |
| P05362 | QFVGKNLTLRCQVEGGAPRANLTVVLRGEKELKREPAVGE    |
| P05362 | VGEPAEVTTVLVRDHGANFSCRTELDLRPQGLELFENT      |
| P05362 | ANFSCRTELDLRPQGLELFENTSAPYQLQTFVLPATPPQLV   |
| P05362 | DGLFPVSEAQVHLALGDQRLNPTVTYGNDSFSAKASVSVTA   |
| P05362 | EAQVHLALGDQRLNPTVTYGNDSFSAKASVSVTAEDEGTQR   |
| P05362 | VSVTAEDEGTQRLTCAVILGNQSQETLQVTIYSPAPNVI     |
| P05362 | NGRSFSCSATLEVAGQLIHKNTRELRLVLYGPRLDERDCPG   |
| P05362 | QTRRLRVLYGPRLDERDCPGNWTWPENSQQTPMCQAWGNPL   |
| P13597 | AQVSIHPREAFLPQGGSVQVNCSSCKEDLSLGLTQWLKD     |
| P13597 | PKDPKEITFTVLASRGDHGANFSCRTELDLRPQGLALFSNV   |
| P13597 | ANFSCRTELDLRPQGLALFSNVSEARSLRTFDLPATIPKLD   |
| P13597 | ASEARIYELGGQMPTQESTNSSDSVSATALVEVTEEFDRT    |
| P13597 | RCVLELADQILETQRTLTVYNFSAFVLTLSQLEVSEGSQVT   |
| P13597 | VVLLSGVEFRPPTPQVQFTLNASSEDHKRSFFCSAALEVAG   |
| P13597 | HKRSFFCSAALEVAGKFLFKNQTLHLVLYGPRLDETCLG     |
| P13597 | QTLHLVLYGPRLDETCLGNWTWQEGSQQTLKQAWGNPS      |

|        |                                            |
|--------|--------------------------------------------|
| P13597 | RKADGALLPIGVVKSVKQEMNGTYVCHAFSSHGNVTRNVYL  |
| P13597 | KSVKQEMNGTYVCHAFSSHGNVTRNVYLTVLYHSQNNWTII  |
| P13598 | FEVHVRPKKLAVEPKGSLEVNCSTTCNQFEVGGLETSLDKI  |
| P13598 | TSLDKILLDEQAQWKHYLVSNISHDVLQCHFTCSGKQESM   |
| P13598 | HDTVLCQCHFTCSGKQESMNSNVSVYQPPRQVILTLQPTLVA |
| P13598 | ECRVPTVEPLDSLTLFLFRGNETLHYETFGKAAPAPQEATA  |
| P13598 | LHYETFGKAAPAPQEATATFNSTADREDGHRNFSCLAVLDDL |
| P13598 | APQEATATFNSTADREDGHRNFSCLAVLDLMSRGGNIFHKH  |
| P32942 | FLLRVEPQNPVLSAGGSLFVNCSTDCPSSEKIALETSLSKE  |
| P32942 | ALETSLSKELVASGMGWAAFNLSNVTGNSRILCSVYCNGSQ  |
| P32942 | TSLSKELVASGMGWAAFNLSNVTGNSRILCSVYCNGSQITG  |
| P32942 | KELVASGMGWAAFNLSNVTGNSRILCSVYCNGSQITGSSNI  |
| P32942 | AAFNLSNVTGNSRILCSVYCNGSQITGSSNITVYRPERVE   |
| P32942 | GNSRILCSVYCNGSQITGSSNITVYRPERVELAPLPPWQP   |
| P32942 | YRPERVELAPLPPWQPVGQNFTRLCQVEDGSPRTSLTVVL   |
| P32942 | APFSCRTELDMPQGLGLFVNTSAPRQLRTEFVLPVTPPRLV  |
| P32942 | DGLFPASEAQVYLAIGDQMLNATVMNHGDTLTATATATARA  |
| P32942 | TATATATARADQEGAREIVCNVTLGGERREARENLTVFSFL  |
| P32942 | GAREIVCNVTLGGERREARENLTVFSFLGPIVNLSEPTAHE  |
| P32942 | GERREARENLTVFSFLGPIVNLSEPTAHEGSTVTVSCMAGA  |
| P32942 | QVTLDGVPAAAPGQPAQLQLNATESDDGRSFFCSATLEVDG  |
| P32942 | DGRSFFCSATLEVDGEFLHRNSVQLRVLYGPKIDRATCPQ   |
| P32942 | LRCLKEGSSREVPVGIPIFFVNVTHNGTYQCQASSRGGKTYL |
| P32942 | KEGSSREVPVGIPIFFVNVTHNGTYQCQASSRGGKTYLVVVM |
| Q9UMF0 | FWADLQPRVAFVERGGSLWLCSTNCPRPERGGLETSLRRN   |
| Q9UMF0 | NCSTNCPRPERGGLETSLRRNGTQRGLRWLARQLVDIREPE  |
| Q9UMF0 | FQRPDRVELMPLPPWQPVGENFTLSCRVPGAGPRASLTTL   |
| Q9UMF0 | RARGAVLTATVLARREDHGANFSCRAELDLRPHGLGLFENS  |
| Q9UMF0 | ANFSCRAELDLRPHGLGLFENSAPRELRTFSLSPDAPRLA   |
| Q9UMF0 | VATATATASAEQEGARQLVCNVTLGGENRETRENTIYSFP   |
| Q9UMF0 | GARQLVCNVTLGGENRETRENTIYSFPAPLLTLSEPSVSE   |
| Q9UMF0 | LVTLEGVPAAPVPGQPAQLQLNATENDRRSFFCDATLDVDG  |
| Q9UMF0 | DRRSFFCDATLDVDGETLIKNSAELRVLYAPRLDDSDCPR   |
| Q9UMF0 | KNVAVTVEYGPRFEEPSCPSNWTWVEGSGRLFSCVEVDGKPO |
| Q9UMF0 | DPSRAPRIPRVLAPGIYVCNATNRHGSVAKTVVVSAAESPP  |
| Q9UMF0 | YRPVVAELAASPPGGVVRPGNFTLTCRAEAWPPAQISWRAP  |
| Q9UMF0 | PPAQISWRAPPGALNIGLSSNNSTLSVAGAMGSHGGEYECA  |
| Q9UMF0 | PAQISWRAPPGALNIGLSSNNSTLSVAGAMGSHGGEYECAA  |
| Q60625 | FWADLQPRVALVERGGSLWLCSTNCPRPERGGLETSLRRN   |
| Q60625 | NCSTNCPRPERGGLETSLRRNGTQRGLRWLARQLVDIREPE  |
| Q60625 | FQRPDRVELVPLPSWQPVGENFTLSCRVPGAGPRASLTTL   |

|        |                                             |
|--------|---------------------------------------------|
| Q60625 | RARGAMLTARVLARREDHRVNFSCLAELDRLRPHGLGLFANS  |
| Q60625 | VNFSCLAELDRLRPHGLGLFANSAPRQLRTFAMPHPSPSLI   |
| Q60625 | LFPAPEAGVYLSLGDQRLNPNVTLDGDSL VATATATASAEQ  |
| Q60625 | GTKQLMVCVVTLGGESRETQENLTVYSFPTPLLTSEPEAPE   |
| Q60625 | LVTLEGIPAAVPGQPAELQLNVTKNDDKRGFFCDAALDVDG   |
| Q60625 | DKRGFFCDAALDVDGETLRKNQSSLRVLYAPRLDDLDCPR    |
| Q60625 | KNVAVTVEYGPSFEELGCPNWTWVEGSGKLFSCVVDGKPE    |
| Q60625 | NSGPRNSMTPGNLSPGIYLCNATNRHGSTVKTVVVS AESPP  |
| Q60625 | EYRPVVAELAASPPSVRPGGNFTLCRAEAWPPAQISWRAP    |
| Q60625 | PPAQISWRAPPGALNLGLSSNNSTLSVAGAMGSHGGEYECA   |
| Q60625 | PPAQISWRAPPGALNLGLSSNNSTLSVAGAMGSHGGEYCAA   |
| Q9DBD0 | ESSAKDLLFSDDTECLSNLQNKTTYKTYLGPQYLTLMDFNR   |
| O75144 | VYVYWQTSSEKTVVYTYHTPQNSLENVDSRYRNRALMSPAG   |
| O75144 | NRALMSPAGMLRGDFSLRFLNVTPQDEQKFHCLVLSQSLGF   |
| O75144 | SQSLGFQEVLSVEVTLHVAANFSVPVVSAPHSPSQDELFTT   |
| O75144 | ELTFCTCTINGYPRPNVYWINKTDNSLLDQALQNDTVFLNM   |
| O75144 | RPNVYWINKTDNSLLDQALQNDTVFLNMRGLYDVVSVLRIA   |
| O75144 | IARTPSVNI GCCIENVLLQQNLTVGSQTGNDIGERDKITEN  |
| Q8MM24 | GGDRDVEAHPNKYVELLEANRTAQONFIDSSMILLKRNGF    |
| Q8MM24 | IKNAFRSANLMLSLTVLPNVNSTWYFDVFKLHPQFDYINLA   |
| Q8MM24 | QIQSAEGLLSWPEICSKLSQNASAQYRGE LAPLRKVTDLTQ  |
| Q9V3D4 | VKDSL RADGFLLSLTVLPNVNSTWYFDI PALNGLVDVFNLA |
| P22304 | RRPDTRTRYDFNSYWRVHAGNFSTIPQYFKENGYVTMSVGK   |
| P22304 | KENGYVTMSVGKVFHFGISSNHTDDSPYSWSFPPYHPSSEK   |
| P22304 | HKPHIFFRYPKEFQKLYPLENITLAPDPEVPDGLPPVAYNP   |
| P22304 | PPVAYNPWMDIRQREDVQALNISVPYGPPIPVDFQRKIRQSY  |
| P22304 | SYLDTQVGRLLSALDDLQLANSTIIAFTSDHG WALGEGHEW  |
| P22304 | RTIDYRYTVWVGFNPDEF LANFSDIHAGELYFVDS DPLQDH |
| P35475 | THWLELVTTTRGSTGRGLSYNFTHLDGYLDLLENQLLPGF    |
| P35475 | AHVS KWNFETWNEPDHDFDNVSMTMQGFLNYDACSEGLR    |
| P35475 | VTYAAMVVKVIAQHQNLLANTTSAPPYALLSNDNAFLSYH    |
| P35475 | FLSYHHPHFAQR TLTARFQVNNTRPPHVQLLRKPVLTAMGL  |
| P35475 | LLDEEQLWAEV SQAGTVLDSNHTVGVLASAHRPQGPADAWR  |
| P35475 | ADAWRAAVLIYASDDTRAHPNRSVAVTLRLRGVPPGPGLVY   |
| P84881 | YYVLPHIWPGGGLSFEKTGNQTCPVSVFQLPRLPLEQNGG    |
| P01570 | QAISVLHEMMQQT FNLFSTKNSAAWDETLLKIFYIELFQQ   |
| P01574 | YEMLQNI FAIFRQDSSSTGWN ETIVENLLANVYHQINHLKT |
| P01575 | QERTNIRKQELLEQLNGKINLTYRADFKIPMEMTEKMQKS    |
| P01575 | SYTAFAIQEMIQNVFLVFRNNFSSTGWN ETIVVRLLDLHQ   |
| P01575 | QEMLQNVFLVFRNNFSSTGWN ETIVVRLLDLHQQT VFLKT  |
| P05000 | HEMLQQIFSLFHTERS SAAWNMTLLDQLHTGLHQQLQHLET  |

|        |                                            |
|--------|--------------------------------------------|
| P01579 | VKEAENLKKYFNAGHSDVADNGTLFLGLIKNWKEESDRKIM  |
| P01579 | MNVKFFNSNKKRDDFEKLTNYSVTDLNVQRKAIHELIQVM   |
| P27352 | DHEVQPTLPSNPGPGPTSASNITVIYTTINNQLRGVELLFNE |
| P27352 | SNITVIYTTINNQLRGVELLFNETINVSVKSGSVLLVLEEAA |
| P27352 | VIYTTINNQLRGVELLFNETINVSVKSGSVLLVLEEAAQRKN |
| O18023 | SKDVIWYKDGSIKSGSFLNTTSEKAYKIQHSIEVDYEKG    |
| O18023 | SCVDNQCSCSREEFTLVLRNLTFDESGRYRCQLGNKSELL   |
| O18023 | TLVLRNLTFDESGRYRCQLGNKSELLEFQVEVLESGLKGGF  |
| O18023 | ELLEFQVEVLESGLKGGFHENISYDHSECCQEKGISPLCRG  |
| O18023 | KVQIREKRSTMVIVTRDDVTNSTTIREFAFQNVNTTERCVT  |
| O18023 | VTRDDVTNSTTIREFAFQNVNTTERCVTSLDLSSTRYIVY   |
| O18023 | GTSVPSVRNIASNTNVHMVKNNASLPDSMKCCTDANVTSFCS |
| O18023 | VHMVKNNASLPDSMKCCTDANVTSFCSSKMCNVAEDPSSFS  |
| O18023 | IATTCRAEWPKVSPCIADGRNHTDCLLKGQVHDCLEICSG   |
| O18023 | LQAIYQCIRQGYETHPSAPGNVTISELTAHSVTVQWTEPNS  |
| O18023 | TAHSVTVQWTEPNSNAHLVENYTLFIRKNEHGEAVRTVKNV  |
| O18023 | VELGLDPDSEYVLTQSHSANGTSLPSTAKLFSTLPTTRPP   |
| O18023 | FTSCCKEQKMPESCMSSCQYNMTLPESCKENLNTWVQCASE  |
| O18023 | NIIVFRVQLFEKGGNLIKTENSADIFRFIDLEPNKDYSVR   |
| O18023 | KDYSVRVTAINFLGEGPPSWNATFTTKPAQIYEGDRPVAPE  |
| O18023 | GDRPVAPEKLRISWNSGPRVNTWDPVSVRRNAEVVTKPIE   |
| O18023 | EYTIYYLDTEQSSTWTTLRTNQTWVVMRDLRKDALYYVYVT  |
| O18023 | VMRDLRKDALYYVYVTAKEDNRTSRSSIIITILAQKDSFGL  |
| O18023 | IVIEPDHKDGVFSPGEKISINCSLPNIKHLNIDLTVGSHV   |
| O18023 | TGDCLQACNIGRTSLSIKNQCTRFAVSLKLCASDIRDHSD   |
| O18016 | IATTCRAEWPKVSPCIADGRNHTDCLLKGQVHDCLEICSG   |
| O18016 | LQAIYQCIRQGYETHPSAPGNVTISELTAHSVTVQWTEPNS  |
| O18016 | TAHSVTVQWTEPNSNAHLVENYTLFIRKNEHGEAVRTVKNV  |
| O18016 | VELGLDPDSEYVLTQSHSANGTSLPSTAKLFSTLPTTRPP   |
| O18016 | FTSCCKEQKMPESCMSSCQYNMTLPESCKENLNTWVQCASE  |
| O18016 | NIIVFRVQLFEKGGNLIKTENSADIFRFIDLEPNKDYSVR   |
| O18016 | KDYSVRVTAINFLGEGPPSWNATFTTKPAQIYEGDRPVAPE  |
| O18016 | GDRPVAPEKLRISWNSGPRVNTWDPVSVRRNAEVVTKPIE   |
| O18016 | EYTIYYLDTEQSSTWTTLRTNQTWVVMRDLRKDALYYVYVT  |
| O18016 | VMRDLRKDALYYVYVTAKEDNRTSRSSIIITILAQKDSFGL  |
| O18016 | IVIEPDHKDGVFSPGEKISINCSLPNIKHLNIDLTVGSHV   |
| O18016 | TGDCLQACNIGRTSLSIKNQCTRFAVSLKLCASDIRDHSD   |
| P08069 | EICGPGIDIRNDYQQLKRENTVIEGYLHILLISKAEDYR    |
| P08069 | TEYLLFRVAGLESIGDLFPNLTVIRGWKLFYNYALVIFEM   |
| P08069 | YALVIFEMTNLKDIGLYLNRNITRGAIRIEKNADLCYLSTV  |
| P08069 | CTENNECCHPECLGSCSAPDNDTACVACRHHYAGVVCVPAC  |

|        |                                             |
|--------|---------------------------------------------|
| P08069 | EGFVIHDGECMQECPGSGFIRNGSQSMYCI PCEGPCPKVCEE |
| P08069 | VSLNFLKNLRLILGEEQLEGNYSFYVLDNQNQLQQLWDWDHR  |
| P08069 | YSFYVLDNQNQLQQLWDWDHRNLTIKAGKMYFAFNPCLCVSE  |
| P08069 | PPDYRDLISFTVYYKEAPFKNVTEYDGDACGSNSWNMVDV    |
| P08069 | TMVENDHIRGAKSEILYIRTNASVPSIPLDVLSASNSSQL    |
| P08069 | LYIRTNASVPSIPLDVLSASNSSQLIVKWNPPSLPNGNLS    |
| P08069 | ASNSSQLIVKWNPPSLPNGNLSYIIVRWQRQPQDGYLYRH    |
| P08069 | HNSIFVPRPERKRRDVMQVANTMSSRSRNTTAADTYNITD    |
| P08069 | ERKRRDVMQVANTMSSRSRNTTAADTYNITDPEELETEYP    |
| P08069 | QVANTMSSRSRNTTAADTYNITDPEELETEYPPFESRVDN    |
| P08069 | VSRQEYRKYGGAKLNRLNPGNYTARIQATSLSGNGSWTDPV   |
| P08069 | LNRLNPGNYTARIQATSLSGNGSWTDPVFFYVQAKTYENF    |
| Q60751 | EICGPGIDIRNDYQQLKRELVIEGFLHILLISKAEDYR      |
| Q60751 | TEYLLFRVAGLES LGDLFPNLTVIRGWKLFYNYALVIFEM   |
| Q60751 | YALVIFEMTNLKDIGLYNLRNITRGAIRIEKNADLCYLSTI   |
| Q60751 | TENNECCHPECLGSCHTPDDNTTCVACRHYKYGVCVPACP    |
| Q60751 | DGFVIHDDECMQECPGSGFIRNSTQSMYCI PCEGPCPKVCGD |
| Q60751 | VSLNFLKNLRLILGEEQLEGNYSFYVLDNQNQLQQLWDWNHR  |
| Q60751 | YSFYVLDNQNQLQQLWDWNHRNLTVRSGKMYFAFNPCLCVSE  |
| Q60751 | PPDYRDLISFTVYYKEAPFKNVTEYDGDACGSNSWNMVDV    |
| Q60751 | TMVENDHIRGAKSEILYIRTNASVPSIPLDVLSASNSSQL    |
| Q60751 | LYIRTNASVPSIPLDVLSASNSSQLIVKWNPPSLPNGNLS    |
| Q60751 | LSASNSSQLIVKWNPPSLPNGNLSYIIVRWQRQPQDGYLY    |
| Q60751 | ASNSSQLIVKWNPPSLPNGNLSYIIVRWQRQPQDGYLYRH    |
| Q60751 | HNSIFVPRPERRRRDMQVANTMSSRSRNTTVADTYNITD     |
| Q60751 | ERRRRDVMQVANTMSSRSRNTTVADTYNITDPEEFETEYP    |
| Q60751 | QVANTMSSRSRNTTVADTYNITDPEEFETEYPPFESRVDN    |
| Q60751 | VSRQEYRKYGGAKLNRLNPGNYTARIQATSLSGNGSWTDPV   |
| Q60751 | LNRLNPGNYTARIQATSLSGNGSWTDPVFFYVPAKTYENF    |
| P01867 | WVNNVEVHTAQQTTHREDYNSTIRVVSTLPIQHQDWMMSGK   |
| P01869 | WVDDVEVHTAQQTPREEQFNSTFRSVSELPIMHQDWLNGK    |
| P01876 | HPRLSLHRPALEDLLGSEANLCTLTGLRDASGVTFTWTP     |
| P01878 | SSDPVIGCLIHDFPSGTMNVTWKGSKDITTVNFPFALA      |
| P01878 | GESVKCSVQHDSNPVQELDVNCSGFTPPPIITIPSCQPSLS   |
| P01877 | LVQGFPPQEPLSVTWESEGNVTARNFPPSQDASGLYTTS     |
| P01877 | LPATQCPDGKSVTCHVKHYTNFSQDVTVPVPPPPPCCHP     |
| P01877 | HPRLSLHRPALEDLLGSEANLCTLTGLRDASGATFTWTP     |
| P01877 | HGETFTCTAAHPELKTPLTANITKSGNTFRPEVHLLPPPSE   |
| P01880 | EVAGKVPTGGVEGLLERHSNGSQSQHSRLTLPRSLWNAGT    |
| P01880 | VSGFSPNILLMWLEDQREVNTSGFAPARPPPQPGSTTFWA    |
| P01854 | CLATGYFPEPVMVTWDTGSLNGTMTLPATTLTSLGHYATI    |

|        |                                             |
|--------|---------------------------------------------|
| P01854 | AKQMFTCRVAHTPSSTDWVDNKTFSVCSRDFTPPTVKILQS   |
| P01854 | HFPPTIQLLCLVSGYTPGTINITWLEDGQVMDVDLSTASTT   |
| P01854 | RKSPTITCLVVDLAPSKGTVNLWRSRSGKPVNHSTRKEEK    |
| P01854 | WSRASGKPVNHSTRKEEKQRNGTLTVTSTLPGTRDWIEGE    |
| P01857 | WYVDGVEVHNAKTKPREEQYNSTYRVVSVLTVLHQDWLNGK   |
| P01868 | WFVDDVEVHTAQTPREEQFNSTFRVSVSELPIMHQDWLNGK   |
| P01862 | WFVDNKPVGNAETKPRVEQYNTTFRVESVLPIQHQDWLRGK   |
| P01859 | WYVDGVEVHNAKTKPREEQFNSTFRVSVLTVVHQDWLNGK    |
| P01860 | WYVDGVEVHNAKTKPREEQYNSTFRVSVLTVLHQDWLNGK    |
| P01860 | FYPSDIAVEWESSGQPENNYNTTPMLDSDGSEFFLYSKLTV   |
| P01861 | WYVDGVEVHNAKTKPREEQFNSTYRVVSVLTVLHQDWLNGK   |
| P03987 | WFVDNKEVHTAWTQPREAQYNSTFRVVSALPIQHQDWMRGK   |
| P03987 | GEIFTCSVVHEALHNHHTQKNLSRSPLELNETCAEAQDGE    |
| P03987 | EALHNHHTQKNLSRSPLELNETCAEAQDGEGLDGLWTTITI   |
| P01871 | VGCLAQDFLPDSITLSWKYKNNSDISSTRGFPSVLRGGKYA   |
| P01871 | WLGQSMFTCRVDHRGLTFQQNASSMCPVDQDTAIRVFAIPP   |
| P01871 | YDSVTISWTRQNGEAVKTHTNISESHPNATFSAVGEASICE   |
| P01871 | WTRQNGEAVKTHTNISESHPNATFSAVGEASICEDDWNSGE   |
| P01872 | MGCLARDFLPSTISFTWNYQNNTTEVIQGIRTFPTLRTGGKY  |
| P01872 | WLNLVYTCRVDHRGLTFLKNVSSCAASPSTDILTFTIPP     |
| P01872 | DILTFTIPPSFADIFLSKSNLTCLVSNLATYETLNISWAS    |
| P01872 | LSKSNLTCLVSNLATYETLNISWASQSGEPLETKIKIMES    |
| P01872 | WASQSGEPLETKIKIMESHNGTFSAKGVASVCVEDWNNRK    |
| P01591 | PNEDIVERNIRIIVPLNNRENISDPTSPLRTRFVYHLS DLC  |
| P34595 | FAPFPQLEHIILRDGDLESLNGTVIHPTLKVLSIENSELTS   |
| P34595 | EVPNTRLVNVSRRNLTSFENISTKLTDLDISFNKLSLWPS    |
| P34595 | KCLLQWSLPVYAQTSIRKDCNLTREEIESASCKIGVVANDT   |
| P34595 | DCNLTREEIESASCKIGVVANDTGIQYKGYEKPTAISCFSY   |
| Q6ZQA6 | VTVQEGPLYRTESSHITWCNVSGYQGPSEQNFQWSIY LPS   |
| Q6ZQA6 | KNIPIVVLPLKSSISVEVASNASVLEGEDLHFSCTVVRTVG   |
| Q6ZQA6 | VQGSLSVLETRQIQLECVVLRNRTSVASQLLVEWFWKPNHP   |
| Q6ZQA6 | RLSPLLYRLTVLEASPQDTGNYSCHVEEWLPSQKEWYRLT    |
| Q969P0 | VLVPEGPLYRVAGTAVSISCNVTGYEGPAQQNFVFLYRPE    |
| Q969P0 | VTVPGGERRIGPGEPELLELCNVSGALPPAGRHAAYS VGWEM |
| Q969P0 | AWAWLAGGTVYRGETASLLCNISVRGGPPGLRLAASWWVER   |
| Q14623 | TQDPPRRALTPAHL LFTADNHTEPAAFRATFASHVQPGQ    |
| Q9VM64 | RSSRSPGAGFKYLKTGTAKANVSQEAAISRRLVLRPDTLG    |
| Q9VM64 | RNGVEIKPEFIGTNGNLFNSVSESSGYSYSCQATNPASGE    |
| Q9VM64 | HRPKPNQGSRQKQMPPTFPNVTRLSDESVMRLRWMVPRNDG   |
| Q9VM64 | QHTYRFRI LAVYSNNDNKESNTSAKFYLPQGAALDMPVPE   |
| Q9VM64 | STTEEPTLQMGDRD TTPSHNETFNMSPLTGTIGGGAVLI    |



|        |                                               |
|--------|-----------------------------------------------|
| Q70UQ0 | EEINEVKTWSNRITEKQDILNNSLTTLSDITKVDQSTTSM      |
| Q70UQ0 | LVTDLLQREKEIAFLSEKISNLTIVQAEIKDIKDEIAHISD     |
| P29460 | DILKDQKEPKNKTFILRCEAKNYSGRFTCWLLTTISTDLTFS    |
| P29460 | AEESLP I EVMVDAVHKLYENYTSFFIRDI I KPDPKLNQ    |
| Q96PD4 | NENQRVMSRNI ESRSTSPWNYTVTWDPNRYPSEVVQAQCR     |
| Q9NPH3 | VEFEDEPARIKCPLFEHFLKFNYSTAHSAGLTLIWYWRQDR     |
| Q9NPH3 | LPENRISKEKDVLWFRPTLLNDTGNYTCMLRNTTYCSKVAF     |
| Q9NPH3 | RISKEKDVLWFRPTLLNDTGNYTCMLRNTTYCSKVAFPLEV     |
| Q9NPH3 | VLWFRPTLLNDTGNYTCMLRNTTYCSKVAFPLEVVQKDCSF     |
| Q9NPH3 | TWYMGCYKI QNFNNVI PEGMNL SFLIALISNNGNYTCVVTY  |
| Q9NPH3 | NVIPEGMNL SFLIALISNNGNYTCVVTY PENGRTFHLTRTL   |
| Q9NPH3 | EVWWTIDGKKPDDITIDVTINESISHSRTEDETRTQILSIK     |
| P27930 | VALRCPQVPYWLWASVSPRINL TWHKND SARTVPGEEETRM   |
| P27930 | QVPYWLWASVSPRINL TWHKND SARTVPGEEETRMWAQDGA   |
| P27930 | ALWLLPALQEDSGTYVCTTRNASYCDKMSIELRVFENTDAF     |
| P27930 | LEDAGYRCLVLTFAHEGQQYNI TRSIELRIKKKKEETIPVI    |
| P27930 | PCKVFLGTGTPLT TMLWWTANDTHIESAYPGGRVTEGPRQE    |
| P27931 | ILWILPAVQQDSGTYICTFRNASHCEQMSVELKVFKNTEAS     |
| P27931 | LDKGNKEFLSAGDPTRLLISNTSMDDAGYRCVMTFTYNGQ      |
| P27931 | MDDAGYRCVMTFTYNGQ EYNI TRNIELRVKGTTEPI PVI    |
| P27931 | PCKVFLGTGTSSNTIVWWLANSTFISAAYPRGRVTEGLHHQ     |
| P18510 | KMCLSCVKSGDETRQL EAVNITDLSENRKQDKRFAFTRSD     |
| Q9HBE5 | DQYEELKDEATSCSLHRSAHNATHATYTCHMDVHFHMADDI     |
| Q9HBE5 | ATYTCHMDVHFHMADDIFSVNITDQSGNYSQECGSFLLAES     |
| Q9HBE5 | DVFHFMAADDIFSVNITDQSGNYSQECGSFLLAES IKPAPPF   |
| Q9HBE5 | YSQECGSFLLAESIKPAPPFNVTVTFSGQYNI SWRSDYEDP    |
| Q9HBE5 | AESIKPAPPFNVTVTFSGQYNI SWRSDYEDPAFYMLKGKLO    |
| Q9GZX6 | APISSHCRLDKSNFQQPYITNRTFMLAKEASLADNNTDVRL     |
| Q9GZX6 | QQPYITNRTFMLAKEASLADNNTDVRLIGEKLFHGVMSER      |
| Q9GZX6 | EKLFHGVMSERCYLMKQVLNFTLEEVLPQSDRFQPYMQE       |
| Q5VWK5 | DAVIALYILFSWCHGGITNINCSGHIWVEPATIFKMGMNIS     |
| Q5VWK5 | NINCSGHIWVEPATIFKMGMNIS IYCYQAAIKNCQPRKLHFY   |
| Q5VWK5 | PRKLHFYKNGIKERFQITRINKTTARLWYKNFLEPHASMYC     |
| Q5VWK5 | SGYPPDIPDEVTCVYIY EYSGNMTC TWNAGKLT YIDTKYVVH |
| Q5VWK5 | VHVKSLETEEEQQYL TSSYINISTDSLQGGKYLWVWQAAN     |
| Q5VWK5 | IHLDDIVIPSAAVISRAETINATVPKTI IYWDSQTTIEKVS    |
| Q5VWK5 | WDSQTTIEKVSCEMRYKATTNQTWNVKEFDTNFTYVQQSEF     |
| Q5VWK5 | CEMRYKATTNQTWNVKEFDTNFTYVQQSEFYLEPNIKYVFQ     |
| P01589 | ECKRGFRRIKSGSLYMLCTGNSHSSWDNQCQCTSSATRNT      |
| P01589 | GNSSHSSWDNQCQCTSSATRNTTKQVTPQPEEQKERTTEM      |
| P14784 | RLPLLI LLLPLATSWASAAVNGTSQFTCFYNSRANISCVWS    |

|        |                                             |
|--------|---------------------------------------------|
| P14784 | WASAAVNGTSQFTCFYNSRANISCVWSQDQALQDTSCQVHA   |
| P14784 | DGALQDTSCQVHAWPDRRRWNQTCELLPVSQASWACNLILG   |
| P14784 | NLRMAPISLQVHVHETHRCNISWEISQASHYFERHLEFEA    |
| P31785 | PSLPFTSLLFLQLPLLGVGLNTTILTPNGNEDTTADFFLTT   |
| P31785 | SVSTLPLPEVQCFVFNVEYMNCTWNSSESEPQPTNLTLYHYWY |
| P31785 | LPLPEVQCFVFNVEYMNCTWNSSESEPQPTNLTLYHYWKNSD  |
| P31785 | VFNVEYMNCTWNSSESEPQPTNLTLYHYWKNSDNDKVQKCSH  |
| P31785 | RRQATQMLKQLNLVIPAAPENLTLHKLSESQLELNWNNRFL   |
| P31785 | PLCGSAQHWSEWSHPHWSNNTSKENPFLFAEAVVISVGS     |
| P32927 | DYTSHTCRWADTQDAQRILVNVTLIRRVNEDLLEPVSCDLS   |
| P32927 | FEVVYKRLQDSWEDAAIILSNTSQATLGPHELMPSSITYVAR  |
| P32927 | RRAEKHIKSSVNIQMAPPPLNVTKDGDYSYLRWETMKMRYE   |
| P01586 | HLGLQASTSGRDTHRLTRTLNCSSIVKEIIGKLEPELTKTD   |
| P01586 | DRYVIKSNLQKLNCLPTSANDSALPGVFIIRDLDLDFRKKLR  |
| P16382 | VDCSSQLCLHYRLMFFEFSENLTICIPRNSASTVCVCHMEMN  |
| P16382 | RQLWQGSFSPSGNVKPLAPDNLTHTNVSDEWLLTWNLLYP    |
| P16382 | SFSPSGNVKPLAPDNLTHTNVSDEWLLTWNLLYPSNNLLY    |
| P16382 | TWNNLYPSNNLLYKDLISMVNISREDNPAEFIVYNVTYKEP   |
| P05112 | TEQKTLCTELTVTDIFAASKNTEKETFCRAATVLRQFYSH    |
| P04401 | STVVKETLTQLSAHRALLTSNETMRLPVPTHKNHQLCIGEI   |
| P04401 | THKNHQLCIGEIFQGLDI LKNQTVRGGTVEMLFQNLSLIKK  |
| P04401 | GLDILKNQTVRGGTVEMLFQNLSLIKKYIDRQKEKCGEERR   |
| P05113 | SALVKETLALLSTHRTLLIANETLRIPVPVHKNHQLCTEEI   |
| P08887 | LTSPLGDSVTLTTCPGVEPEDNATVHWLKRKPAAGSHPSRWA  |
| P08887 | RWAGMGRLLLRVQLHDSGNYCYRAGRPAAGTVHLLVDVP     |
| P08887 | KFSKTQTFQCGGILQPDPPANITVAVARNPRWLSVTWQDP    |
| Q00560 | QLEPCGYIYPEFPVVQGRSNFTAICVLKEACLQHYVYNAS    |
| Q00560 | GSNFTAICVLKEACLQHYVYNASYIVWKTNHAAVPREQVTV   |
| Q00560 | SYIVWKTNHAAVPREQVTVINRTSSVTFTDVLPSVQLTC     |
| Q00560 | IEQNVYGVTMLSGFPPDKPTNLTCIVNEGKNMLCQWDPGRE   |
| Q00560 | NEGKNMLCQWDPGRETYLETNYTLKSEWATEKFPDCQSKHG   |
| Q00560 | VSSSEINFDPVDKVKPTPPYNLSVTNSEELSSILKLSWVSS   |
| Q00560 | LTQSKSVSQTYTVTGTTELTVNLTNDRYVASLAARNKVGKSA  |
| Q00560 | CVLSENAPCVEDWQQEDATVNRTHLRGRLLSKCYQITVTP    |
| Q00560 | NEAVLAWDQIPVDDQNGFIRNYSISYRTSVGKEMVVHVDSS   |
| P40189 | ELLDPCGYISPESPVVQLHSNFTAICVLKEKCMDYFHVAN    |
| P40189 | NYIVWKTNHFTIPKEQYTIINRTASSVTFTDIASLNIQLTC   |
| P40189 | LEQNVYGITIISGLPPERPKNLSCIVNEGKMRCEWDGGRE    |
| P40189 | NEGKMRCEWDGGRETHLETNFTLKSEWATHKFADCKAKRD    |
| P40189 | VTSDHINFDPYKVPNPPHNSVINSEELSSILKLTWTNP      |
| P40189 | ANGKILDYEVTLTRWKSHLQNYTVNATKLTVNLNDRYLAT    |

|        |                                              |
|--------|----------------------------------------------|
| P40189 | ILDYEVTLTRWKSHLQNYTVNATKLTVNLTNDRYLATLTVR    |
| P40189 | LTRWKSHLQNYTVNATKLTVNLTNDRYLATLTVRNLVGKSD    |
| P40189 | NEAVLEWDQLPVDVQNGFIRNYTIFYRTIIGNETA VNVDS    |
| P40189 | VDVQNGFIRNYTIFYRTIIGNETA VNVDSHTEYTLSSLTS    |
| P16871 | DLEDAELDDYSFSCYSQLEVNQSQHSLTCAFEDPDVNTNL     |
| P16871 | QLEVNQSQHSLTCAFEDPDVNTNLEFEICGALVEVKCLNF     |
| P16871 | APFDLSVIYREGANFVVTFNTHLQKKYVKVLMHDVAYRQ      |
| P16871 | VLMDVAYRQEKDENKWHVNLSSTKLTLLQRKLPAAAME       |
| P16871 | YFKGFWEWSPSYFRTPEINSSGEMDPILLTISILSFFS       |
| P16871 | FKGFWEWSPSYFRTPEINSSGEMDPILLTISILSFFSV       |
| P15247 | TNYLIENLKDDPPSKCSCSGNVTSCCLSVPTDDCTTPCYR     |
| P15247 | SVPTDDCTTPCYREGLLQTNATQKSRLLPVHRVCRIVEV      |
| P15247 | QKSRLLPVHRVCRIVEVLKNITCPSFCEKPCNQT MAGNT     |
| P15247 | RIVEVLKNITCPSFCEKPCNQT MAGNTLSFLKSLLGTFQK    |
| P05231 | IDKQIRYI LDGISALRKETCNKSNMCESSKEALAENNLNP    |
| Q01638 | VRCPRQGKPSYTVDWYYSQTNKSIPTQERNRVFASGQLLKF    |
| Q01638 | LPAAVADSGIYTCIVRSPTFNRTGYANVTIYKKQSDCNVPD    |
| Q01638 | DSGIYTCIVRSPTFNRTGYANVTIYKKQSDCNVPDYLMYST    |
| Q01638 | STVSGSEKNSKIYCPIDLYNWTAPLEWFKNCQALQGSRYR     |
| Q01638 | VMTE DAGDYTCFKFIHNENGANYSVTATRSFTVKDEQGFSLF  |
| Q01638 | PVIGAPAQNEIKEVEIGKNANLTC SACFGKGTQFLAAVLWQ   |
| Q01638 | TCSACFGKGTQFLAAVLWQLNGTKITDFGEPRIQQEEGQNO    |
| Q01638 | LNGTKITDFGEPRIQQEEGQNSF SNGLA CLDMVLR IADVK  |
| P49049 | LWVARVFQILRVPEEYVQKINSTIISY TANTTTTGPSEFFL   |
| P49049 | LRVPEEYVQKINSTIISY TANTTTTGPSEFFLLRLASRIPQ   |
| P82176 | HEYYECGGACDNVCADLHIQNKTNCP IINIRCNDRCYCEDG   |
| P82176 | CIDSPPPSPGCSCNSGYLRLNLTS PCIPICDCPQM QHSFDC  |
| Q03600 | HWCEQVRFEYENVEDYAKRPNETRGRTVHPLGKNDQLLAST    |
| Q03600 | HPLGKNDQLLASTIVSKGTKNGSALVCAPLIRYHQTAAYPQ    |
| Q03600 | LFFIQDSSSKLTLNEDKFIINGTAMGS AFGYSIEVVDLNGD   |
| Q03600 | AIPFRADTTARGFIEGSHSHNYSWPCGSNSHVQKRTRYQLI    |
| Q03600 | KLTRGRTEGIGKALKFMAHVNSTSQETEEELKDNKWEAEVQ    |
| Q03600 | KARAESELELEEDIGTMVRHNYTIINHGPWTVRNVEAHISW    |
| Q03600 | HFD FIDANS AVVIDLRARLWNATFIEDYSDVESVKIRSF GK |
| P48551 | SCTFKISLRNFRSILSWELKNHSIVPTHYTLTYT IMSKPED   |
| P48551 | TLTYT IMSKPEDLVVKN CANTTRSFCDLTDEWRSTHEAYV   |
| P48551 | TDEWRSTHEAYVTVLEGFSGNTTLFSCSHNFWLAIDMSFEP    |
| P48551 | LVIEEQSEGIVKHKKPEIKGNMSGNFTYIIDKLI PNTNYCV   |
| P48551 | EQSEGIVKHKKPEIKGNMSGNFTYIIDKLI PNTNYCVSVYL   |
| O35664 | SLETITPSAFDGYDPDEPCTINITIRNSRLILSWELENKSGP   |
| O35664 | PCTINITIRNSRLILSWELENKSGPPANYTLWYTVMSKDEN    |

|        |                                            |
|--------|--------------------------------------------|
| 035664 | IRNSRLILSWELNKGPPANYTLWYTVMSKDENLTKVKNC    |
| 035664 | NKSGPPANYTLWYTVMSKDENLTKVKNCSDTTKSSCDVTDK  |
| 035664 | ANYTLWYTVMSKDENLTKVKNCSDTTKSSCDVTDKWLEGME  |
| 035664 | PANAPLEPPEFEIVGFTDHINVTMEFPPVTSKIIQEKMKTT  |
| 035664 | FVIKEQIGDSVRKKHEPKVNNVTGNFTFVLRDLLPKTNYCV  |
| 035664 | EQIGDSVRKKHEPKVNNVTGNFTFVLRDLLPKTNYCVSLYF  |
| P17181 | LKSPQKVEVDIIDDNFILRWNRSDSVGNVTFSPDYQKTGM   |
| P17181 | VDIIDDNFILRWNRSDSVGNVTFSPDYQKTGMNWKLSG     |
| P17181 | FSFDYQKTGMNWKLSGQNITSTKCNFSSLKLNVEEIK      |
| P17181 | TGMDNWKLSGQNITSTKCNFSSLKLNVEEIKLRIRAEK     |
| P17181 | SSLKLNVEEIKLRIRAEKENTSSWYEVDSFTPRKAQIGP    |
| P17181 | DSVMWALDGLSFTYSLVIWKNSGVEERIENIYSRHKIYKL   |
| P17181 | NIEVSVQNQNYVLKWDYTYANMTFQVQWLHAF LKRNPGNHL |
| P17181 | FPQNVFQKGIYLLRVQASDGNNTSFWSEEIKFDTEIQAFLL  |
| P17181 | PQNVFQKGIYLLRVQASDGNNTSFWSEEIKFDTEIQAFLLP  |
| P17181 | SGNTFVIQDYPLIYEIIFWENTSNAERKIEKKTDTVPNL    |
| P17181 | LKPLTVYCVKARAHMTDEKLNKSSVFSDAVCEKTKPGNTSK  |
| P17181 | EKLNKSSVFSDAVCEKTKPGNTSKIWLIVGICIALFALPFV  |
| Q9WU62 | QAISEPDEEQLEDEELQPCQNKTPSPCCPANKVVRPLRFTL  |
| Q9VR07 | IDCNNRWNTPDCWVPQRKGINASAPDTSRTPSEEFFENKVL  |
| P05111 | VTSACLWFHTGLDRQGTAAANSSEPLLGLLALSPGGPVAVP  |
| P05111 | LLQRPEEPAAHANCHRVALNISFQELGWERWIVPPSFIF    |
| P05111 | YPPSFIFHYCHGGCGLHIPNLSLPVPGAPPTPAQPYSLLP   |
| P58166 | LRGEKSGVLKQLDCRPLEGNSVTGQPRRLDLAGHQPPF     |
| Q8IU57 | PLLLCQLQAAPGRPRLAPPQNVTLSSQNFVYLTWLPGLGN   |
| Q8IU57 | QAAPGRPRLAPPQNVTLSSQNFVYLTWLPGLGNPQDVTYF   |
| Q8IU57 | EVEPAPPVVLVTQTEEILSANATYQLPPCMPPLDLKYEVAF  |
| Q8IU57 | PCMPPLDLKYEVAFWKEGAGNKTLFPVTPHGQPVQITLQPA  |
| Q968Y9 | TPDSSMDCYEENPPSQKTSINYSWISKSSMTSLMLLLFA    |
| Q968Y9 | PQWSKLGDPNEKDLAQRMVNCTVVEGSLTISFVLKHKTKA   |
| Q968Y9 | HYLEEKNQEQQVERVQSCWSNTTCQKSCAYDRLLPTKEIGP  |
| Q968Y9 | LLQRRCVTRQCLQLNPVLSNKTVPKATAGLCSDKCPDGY    |
| Q968Y9 | HVIDTFPKAQAIRLCNIIIDGNLTIEIRGQDSGMASELKDI  |
| Q968Y9 | PIDQSEGTNGEKAICEDMAINVSI TAVNADSVFFSWPSFNI |
| Q968Y9 | INVSITAVNADSVFFSWPSFNITDIDQRKFLGYELFFKEVP  |
| Q968Y9 | DQRKFLGYELFFKEVPRIDENMTIEEDRSACVDSWQSVFKQ  |
| Q968Y9 | PGTRIRLYEIEYELPGSWAINVSALALDNSYVIRNLKHYTL  |
| Q968Y9 | YVIRNLKHYTLYAISLSACQNMTPGASCISHRAGALKRT    |
| Q968Y9 | SHRAGALKRTHITDIDKVLNETIEWRFMNSQQVNVWTDWP   |
| Q968Y9 | TKHITDIDKVLNETIEWRFMNSQQVNVWTDWPTEVNGGIF   |
| Q968Y9 | IDKVLNETIEWRFMNSQQVNVWTDWPTEVNGGIFGYVVKL   |

|        |                                                       |
|--------|-------------------------------------------------------|
| P09208 | RQAVEAVDSPASSEEAYSSNSSSCQASSETSAEEVWFLSH              |
| P09208 | HHYQHHHQHHQHHQRQQANVSYTKFLLLLQTLAAATRL                |
| P09208 | ATPQQKQEKDRHKCFHYKHNYSPGISLLLFILLANTLA                |
| P09208 | VKPKSMDIRNMVSHFNQLENCTVIEGFLLIDLINDASPLN              |
| P09208 | NCTVIEGFLLIDLINDASPLNRSFPKLTEVTDYII IYRVTG            |
| P09208 | TDYII IYRVTGLHLSLSKIFPNLSVIRGNKLF DG YALVVYSN         |
| P09208 | EKNHLCYDRTIDWLEILAENETQLVVL TENGKEKECRLSK             |
| P09208 | CPGEIRIEEGHDTTATEGELNASCQLHNNRRLCWN SKLCQT            |
| P09208 | DEHTCCSQDCLGGCVIDKNGNESICSRNVSFNNICMDS CP             |
| P09208 | DCLGGCVIDKNGNESICSRNVSFNNICMDS CKPGYYQFDS             |
| P09208 | ADKYALYVLDNRDLDELWGPNTV FIRKGGVFFHFNP KLCV            |
| P09208 | KSDVGADSNNGRSGCTAVLNVTLQSVGANSAM LNVTTKVE             |
| P09208 | CGTAVLNVTLQSVGANSAM LNVTTKVEIGEPQKPSNAT I VF          |
| P09208 | NSAM LNVTTKVEIGEPQKPSNATI VFKDPRAFI GFV F YHMI        |
| P09208 | FKDPRAFI GFV F YHMI DPYGNSTKSSDDPCDDR W K V S S P E K |
| P09208 | KVSSPEKSGVMVLSNLI PYTNYSYVVRTMAISSELTNAESD            |
| P09208 | PGRPSKVTEVVATAISDSKINVTWSYLDKPYGVLTRYFIKA             |
| P09208 | MEFENALQNFIFVPNIRKSKNGSSDKSDGAEGAALDSNAIP             |
| P09208 | EEDLSSNKQFYEVFALPNNQTHFVFEKLRHFTRYAIFVV               |
| P09208 | TKRKFADIVMDLKV DLEHANNTE SPVRVRWTP PVDPNGEI           |
| P09208 | KRKFADIVMDLKV DLEHANNTE SPVRVRWTP PVDPNGEI V          |
| P09208 | YKLQKPDQVEEKKCI PAADFNQTAGYLIKLN EGYL SFRVRA          |
| P06213 | LGAAGHLYPGEVCPGMDIRNNLRLHELENC SVIEGHLQIL             |
| P06213 | GEVCPGMDIRNNLRLHELENC SVIEGHLQILLMFKTRPED             |
| P06213 | TDYLLFRVYGLESKDLFPNLTVIRGSR LFFNYALVIFEM              |
| P06213 | YALVIFEMVHLKELGLYNLMNITRGSVRIEKNNELCYLATI             |
| P06213 | ICKSHGCTAEGLCCHSECLGNCSQPDDPTKCVACRN FYLDG            |
| P06213 | GRCVETCPPPYHFQDWRCVNF SFCQDLHKKCKNSRRQGCH             |
| P06213 | HQYVIHNNKCIPECPSGYTMNSNLLCTPCLGPCPKVCHLL              |
| P06213 | GEKTIDSVTSAQELRGCTVINGSLIINIRGGNNLAAELEAN             |
| P06213 | VSLFFRKLRLIRGETLEIGNYSFYALDNQNLRLQLDWDSKH             |
| P06213 | YSFYALDNQNLRLQLDWDSKHNLITQGKLFHYNPKLCLSE              |
| P06213 | PPDFRDLGFM LFYKEAPYQNVTEFDGQDACGSNSWTVVDI             |
| P06213 | IYVQTDATNPSVPLDPISVSNSSQIILKWKPPSDPNGNIT              |
| P06213 | VSNSSQIILKWKPPSDPNGNITHYLVFERQAE DSELFEL              |
| P06213 | LKLPSRTWSPPFESDSQKHQSEYEDSAGECCSCKP TDSQ              |
| P06213 | GTGAEDPRPSRKRSLGDVGNVTVAAPTVAAFPNTSSTSV P             |
| P06213 | RSLGDVGNVTVAAPTVAAFPNTSSTSVPTSPEEHRPF EKVV            |
| P06213 | VSRKHFALE RGCRLRGLSPGNYSVRIRATSLAGNSWTEPT             |
| P06213 | LRGLSPGNYSVRIRATSLAGNSWTEPTYFYVTDYLDVPSN              |
| P15208 | VGTAGHLYPGEVCPGMDIRNNLRLHELENC SVIEGHLQIL             |

|        |                                             |
|--------|---------------------------------------------|
| P15208 | GEVCPGMDIRNNLTRLHELENCVIEGHLQILLMFKTRPED    |
| P15208 | TDYLLFRVYGLESKDLFPNLTVIRGSRLFFNYALVIFEM     |
| P15208 | YALVIFEMVHLKELGLYNLMNITRGSVRIEKNNELCYLATI   |
| P15208 | ICKSHGCTAEGLCCHKECLGNCSEPDPTKCVACRNFYLDG    |
| P15208 | GQCVEETCPPYYHFQDWRVCVNFSCQDLHFKCRNSRKPQCH   |
| P15208 | HQYVIHNNKCIPECPSGYTMNSSNLMCTPCLGPCPKVCQIL   |
| P15208 | GEKTIDSVTSAQELRGCTVINGSLIINIRGGNNLAAELEAN   |
| P15208 | VSLFFRKLHLIRGETLEIGNYSFYALDNQNLRLQLDWWSKH   |
| P15208 | YSFYALDNQNLRLQLDWWSKHNLTIQGGKLFHYNPKLCLSE   |
| P15208 | PPDFRDLLGFMLFYKEAPYQNVTEFDGQDACGNSWTVVVDI   |
| P15208 | IYVQTDATNPSVPLDPIVSNSSSQIILKWKPPSPDNGNIT    |
| P15208 | VSNSSSQIILKWKPPSPDNGNITHYLVYWERQAEDESELFEL  |
| P15208 | LKLPSTRWSPPFESDDSQKHNSQSEYDDSAECCSCPCKTDSQ  |
| P15208 | HNVVFPVPRPSRKRSLSEEVGNVTATTLTLPDFPNVSSTIVP  |
| P15208 | RSLEEVGNVTATTLTLPDFPNVSTIVPTSQEEHRPFQKVV    |
| P15208 | VSRKHFAALERGCRLRGLSPGNYSVRVRATSLAGNGSWTEPT  |
| P15208 | LRGLSPGNYSVRVRATSLAGNGSWTEPTYFYVTDYLDVPSN   |
| O94220 | TAIADENGVEAFTGTAYYDPNNTSGLGDSANPPYLAWFTGY   |
| O94220 | AIADENGVEAFTGTAYYDPNNTSGLGDSANPPYLAWFTGYT   |
| O94220 | MVLAHGGQDKLSFWTSADTINWTWQSDLKSTSINGLSSDIT   |
| O94220 | FVQQPITELDTISTSLQILANQTIPTGQTLSSIRGTALDV    |
| Q96TU3 | QYHFSPOKNNMNDPNGLLYHNGTYHLFFQYNPGGIEWGNIS   |
| Q96TU3 | YHNGTYHLFFQYNPGGIEWGNISWGHAISEDLTHWEEKPVA   |
| Q96TU3 | RGFGSDVTEMYFSGSAVADVNNNTSGFGKDGKTPLVAMYTSY  |
| Q96TU3 | GFGSDVTEMYFSGSAVADVNNNTSGFGKDGKTPLVAMYTSYY  |
| Q96TU3 | NAQGGVWECPGLVKLPLDSGNSTKWVITSGLNPGGPPGTVG   |
| Q96TU3 | FVGEFDGTTFTPDADTVYFGNSTANWMDWGPDFYAAAGYNG   |
| Q96TU3 | ISNKRPIYSRTFKTLSEGSTNTTTGETFKVDLSFSAKSKA    |
| Q96TU3 | LSFSAKSKASTFAIALRASANFTEQTLVGYDFAKQOIFLDR   |
| Q43866 | ILYTGIDPKNQVQNIAPKNSDPYLRWKKSPLNPLMAP       |
| Q43866 | REWKKSPLNPLMAPDAVNGINASSFRDPTTAWLGQDKKWRV   |
| Q43866 | YASKTFFDPAKRRILGWWTNESSVEDDVEKGSQIQTIP      |
| Q43866 | EKADVIEPSWTDPLQILCSKMNVSVKSLGPPGLMVLASKNL   |
| P26792 | TGIVEGPPKNVQVQNYAIPANLSDPYLRKWKIPDNNPLVVA   |
| P26792 | YLRKWKIPDNNPLVVANNGENATAFRDPTTAWLDKSGHWKM   |
| P26792 | RYEYTVGTYLTDKDRYIPDNTSVDGWAGLRYDYGNYFASK    |
| P26792 | YASKTFFDPSKNRRILGWANESDSTAHDVAKGWAGIQLIP    |
| P26792 | SSRVYPTLAVYENAHLYVFNGSETITVENLDAWSMKKPLR    |
| P00724 | IQAFLFLLAGFAAKISASMTNETSDRPLVHFTPNKGMNDP    |
| P00724 | NGLWYDEKDAKWHLYFYQYNPNDTVWGTPLFWGHATSDDLTN  |
| P00724 | ATSDDLTNWEDQPIAIAIPKRNDSGAFSGSMVVYDNNNTSGFF |

|        |                                              |
|--------|----------------------------------------------|
| P00724 | AIAPKRNDSGAFSGSMVVYDYNNTSGFFNDTIDPRQRCVAIW   |
| P00724 | DSGAFSGSMVVYDYNNTSGFFNDTIDPRQRCVAIWYNTYPES   |
| P00724 | YSLDGGYTFTEYQKNPVLAA NSTQFRDPKVFWEYEPSQKWIM  |
| P00724 | SINPGAPAGGSFNQYFVGSFNGTHFEAFDNQSRVDFGKDY     |
| P00724 | G SFNQYFVGSFNGTHFEAFDNQSRVDFGKDYALQTF FNT    |
| P00724 | TEYQANPETELINLKAEPILNISNAGPWSRFATNTTLTKAN    |
| P00724 | LKAEPILNISNAGPWSRFATNTTLTKANSYNVDLSNSTGTL    |
| P00724 | SRFATNTTLTKANSYNVDLSNSTGTLEFELVYAVNTTQTIS    |
| P00724 | YNVDLSNSTGTLEFELVYAVNTTQTISKSVFADLSLWFKGL    |
| O01634 | FSEDKAERSYNWEQLVADKQNTTSLKQTNQIGYYQWVPFIL    |
| Q21123 | RQQNFGFDMWKTIFYGSTNGNETWRENGVFP RVTLCDFETR   |
| P01005 | LCGFLPDAAFGAEVDCSRFPNATDKEGKDVLCNKDLRPIC     |
| P01005 | DGVTYTNDCLLCAYSIEFGTNI SKEHDGECKETVPMNCSSY   |
| P01005 | EFGTNI SKEHDGECKETVPMNCSSYANTTSEDGKVMVLCNR   |
| P01005 | SKEHDGECKETVPMNCSSYANTTSEDGKVMVLCNRAFNPVC    |
| P01003 | DGVTYNHECMLCFYNKEYGTNISK EQDGECGETVPMDCSRY   |
| P01003 | SKEQDGECGETVPMDCSRYPNTTSEDGKVTILCTKDFSFVC    |
| Q9N2I2 | TVVRVPMKQDQFYLLDRNL SCKVVGVPYQGNATAFFIL      |
| Q9N2I2 | FYYLLDRNL SCKVVGVPYQGNATAFFILPREGEMEQVENGL   |
| Q9N2I2 | LPKLGIRDIFTSDADLTGISNHSS IRVSEMVKAVEVDES     |
| P05154 | TVVRVPMMSREDQYHYLLDRNL SCRVVGVPYQGNATALFIL   |
| P05154 | YHYLLDRNL SCRVVGVPYQGNATALFILPSEGKMQQVENGL   |
| P05154 | LPSLGISNVFTSHADLSGISNHSNIQVSEMVKAVEVDES      |
| O00105 | TGYLLTLSAAFQVAQA AVTANNSQLLTWHNTGEINTQTPV    |
| O00105 | VYLAIPGNGMSDQLQYTQGYNQTA WTSFLYSHDATVKISR    |
| O00105 | QTQAWTSFLYSHDATVKISRNGSSANSNVVIRPTSLNFPVR    |
| O00105 | SANSNVVIRPTSLNFPVR YDNQSVYITVPYSPTGYRFSVEF   |
| O00105 | APSGARQPENALLIFASPFENSSTKPQPGSPNSIAPAPGRV    |
| O00105 | KPQPGSPNSIAPAPGRV LGLNTSASTVVFNPGVYFTGHD     |
| O00105 | YQKASGANNGLRMWRGTLGNSSQTFV LNVTVSAPPFNSM     |
| O00105 | TILQDVFYHTDDDG LKMYYSNV TARNIVMWKESVAPVVEFG  |
| O00105 | NPGIFGAVNNYLYAPDGLSSNHSTGNSNMTVRNITWSNFRA    |
| O00105 | VNNYLYAPDGLSSNHSTGNSNMTVRNITWSNFRAEGSSSAL    |
| O00105 | YAPDGLSSNHSTGNSNMTVRNITWSNFRAEGSSSALFRINP    |
| O00105 | FRAEGSSSALFRINPIQNLDNISIKNVSIESFEPLSINTTE    |
| O00105 | SSSALFRINPIQNLDNISIKNVSIESFEPLSINTTESWMPV    |
| O00105 | NLDNISIKNVSIESFEPLSINTTESWMPVWYDLNNGKQITV    |
| O00105 | LNNGKQITVTFDIEGFTVGNTTITASNAASVGRIDGVDPA     |
| Q6GU68 | FQIADCAYRDLEGVPPGF PANVTTL SLSANRLPGLPEGAFR  |
| Q6GU68 | DLEGVPPGF PANVTTL SLSANRLPGLPEGA FREVPLQLSLW |
| Q6GU68 | GRALPGALATSGQPRFQAFANGSL LIPDFGKLEEGTYSCLA   |

|        |                                             |
|--------|---------------------------------------------|
| Q9TXD8 | VIGNYANGICVPGKVTNPEGNATVIGWGKISSGGKQVNTLQ   |
| P61622 | METNGHQKTGDVYKCPVTQGNCTKLNLRVTLNSVSEKDN     |
| P61622 | KCPVTQGNCTKLNLRVTLNSVSEKDNMRLGSLATNPKD      |
| P61622 | DGESHDSPLEKVIQSEKDNVTRYAVAVLGYNRRGINPE      |
| P61622 | ETFLNEIKYIASDPDDKHFFNVTDAAALKDIVDALGDRIFS   |
| P61622 | LKDIVDALGDRIFSLEGTNKNETSFGLEMSQTGFSSHVED    |
| P61622 | VTSVSSRQGRVYVAGAPRFNHTGKVIILFSMHNNRSLTIHQ   |
| P61622 | VAGAPRFNHTGKVIILFSMHNNRSLTIHQALRGEQIGSYFGS  |
| P61622 | EGRERGVYVYNLRQNRVYNGTLKDSHSYQNFARFGSCIAS    |
| P61622 | LAVGALGNAVVLWARPVVQINASLHFEPKINIFHKDCRKN    |
| P61622 | CFIPIFLAPHFQTATVGI RYNATMDERRYPRAHLDEGGDQ   |
| P61622 | RVAVEATLENRGENAYSAVLNISQSENLOFASLIQKDDSDN   |
| P61622 | DSDNSIECVNEERRLHKKVCNVSYPPFRKAKVAFRLDFEF    |
| P61622 | YEADVLFTRSSSLSHFEVKANSLESYDGI GPPFNCVFKVQ   |
| P61622 | IATRGGNRLMLRDFFTDQGN TSCNIWGNSTEYRSTPTEED   |
| P61622 | LLMLRDFFTDQGN TSCNIWGNSTEYRSTPTEEDLSHAPQRN  |
| P61622 | NSTEYRSTPTEEDLSHAPQRNHSNSDVVSIICNLR LAPSQE  |
| Q9UKX5 | LETNGYQKTGDVYKCPVIHG NCTKLNLRVTLNSVSEKDN    |
| Q9UKX5 | KCPVIHG NCTKLNLRVTLNSVSEKDNMRLGSLATNPKD     |
| Q9UKX5 | DGESHDSPLEKVIQQSERDNVTRYAVAVLGYNRRGINPE     |
| Q9UKX5 | ETFLNEIKYIASDPDDKHFFNVTDAAALKDIVDALGDRIFS   |
| Q9UKX5 | LKDIVDALGDRIFSLEGTNKNETSFGLEMSQTGFSSHVED    |
| Q9UKX5 | VTSVSSRQGRVYVAGAPRFNHTGKVIILFTMHNNRSLTIHQ   |
| Q9UKX5 | VAGAPRFNHTGKVIILFTMHNNRSLTIHQAMRQQIGSYFGS   |
| Q9UKX5 | EGRERGVYVYELRQNL FVYNGTLKDSHSYQNFARFGSSIAS  |
| Q9UKX5 | LAVGALGNAVILWSRPVVQINASLHFEPKINIFHRDCRKS    |
| Q9UKX5 | CFTPIFLAPHFQTTTVGI RYNATMDERRYPRAHLDEGGDR   |
| Q9UKX5 | RVAVEATLENRGENAYSTVLNISQSANLOFASLIQKEDSDG   |
| Q9UKX5 | DSDGSIIECVNEERRLQKQVCNVSYPPFRKAKVAFRLDFEF   |
| Q9UKX5 | YEADVLFTRSSSLSHYEVKPNSSLERYDGI GPPFCIFRIQ   |
| Q9UKX5 | IATRSGNRLKLRDFLTDEANTSCNIWGNSTEYRPTPVEED    |
| Q9UKX5 | LLKLRDFLTDEANTSCNIWGNSTEYRPTPVEEDLRRAPQLN   |
| Q9UKX5 | NSTEYRPTPVEEDLRRAPQLNHSNSDVVSIINCNI RLVPNQE |
| P56199 | YENEEGKWVLIGSPLVGQPKNRTGDVYKCPVGRGESLPCVK   |
| P56199 | YKCPVGRGESLPCVKLDLPVNTSIPNVTEVKENMTFGSTLV   |
| P56199 | GRGESLPCVKLDLPVNTSIPNVTEVKENMTFGSTLVTPNG    |
| P56199 | CVKLDLPVNTSIPNVTEVKENMTFGSTLVTPNGGFLACGP    |
| P56199 | LERMDIGPKQTQVGIVQYGENVTHEFNLNKYSSTEEVLVAA   |
| P56199 | CEDENIQRFSAIILGSYNRGNLSTEKFVVEEIKSIASEPTK   |
| P56199 | EKFVVEEIKSIASEPTKHFVNVSDELALVTIVKTLGERIFA   |
| P56199 | FSAHYSQDWMLGAVGAYDWNGTVVMQKASQIIIPRNTTFN    |



|        |                                             |
|--------|---------------------------------------------|
| P56199 | AYDWNQTVVMQKASQIIIPRNTTFNVESTKKNEPLASLYG    |
| P56199 | VNSATASSGDVLYIAGQPRYNHTGQVIIYRMEDGNIKILQT   |
| P56199 | APMYMGTEKEEQGKVYVYALNQTRFEYQMSLEPIKQTCSS    |
| P56199 | NKVN IQKKNCHMEGKETVCINATVCFDVKLKS KEDTIYEAD |
| P56199 | SLRQISRSFFSGTQERKVQRNITVRKSECTKHSFYMLDKHD   |
| P56199 | SFYMLDKHDFQDSVRITLDFNLDPENGFVLDLSDLPNSVHE   |
| P56199 | LHVATTEKDLLIVRSQNDKFNVSLTVKNTKDSAYNTRTIVH   |
| P56199 | PNLVFSGIEAIQKDSCESENHNITCKVGYPFLRRGEMVTFKI  |
| P56199 | VGYPFLLRRGEMVTFKILFQFNNTSYLMENVTIYLSATSDSEE |
| P56199 | RGEMVTFKILFQFNNTSYLMENVTIYLSATSDSEEPETLSD   |
| P56199 | YLSATSDSEEPETLSDNVVNIISIPVKYEVGLQFYSSASEY   |
| P56199 | YEVGLQFYSSASEYHISIAANETVPEVINSTEDIGNEINIF   |
| P56199 | SSASEYHTSIAANETVPEVINSTEDIGNEINIFYLIRKSGS   |
| P56199 | LIRKSGSFPMPELKLISIFPNMTSNGYPVLYPTGLSSSENA   |
| P56199 | HLKRGTILDCNTCKFATITCNLTSSDISQVNVSLILWKPTF   |
| P56199 | NTCKFATITCNLTSSDISQVNVSLILWKPTFIKSYFSSLNL   |
| P56199 | VNVSLILWKPTFIKSYFSSLNLTIRGELRSENASLVLSSEN   |
| P56199 | FIKSYFSSLNLTIRGELRSENASLVLSSENQKRELAIQISK   |
| Q24247 | PHSHFGYSVATHTIGEANGPNKNCVVLVGA PLDQNRQPNTT  |
| Q24247 | GPNKTNVVLVGA PLDQNRQPNTTHSGALWRCPMTQRFDCE   |
| Q24247 | DEIKEDQWGMVTVRSNPLQANGSGKVIVCAHRYMYIVREN    |
| Q24247 | ISGNTDLDNNSYPDVVIGAFNSSAAVILLARPIISIQTSVQ   |
| Q24247 | RKELHNMDPNTPGCLDDPASNLTCFTFRACCSIEPYDEKNK   |
| Q24247 | QKDCGDDDLCESNLIIRVEPNITESSGNEYTLILDETELEV   |
| Q24247 | ESSGNEYTLILDETELEVRINVSNLADSAYEAQLFIAHQAG   |
| Q24247 | AQLFIAHQAGVSYVATKKPTNATCNSYNTTLVACSLGNPML   |
| Q24247 | QAGVSYVATKKPTNATCNSYNTTLVACSLGNPMLRDTTTFV   |
| Q24247 | RFQPKGLEPSEKIMLFHIFANTTSKLVGPERPERDLRVNVV   |
| Q24247 | AYLSAPAQMRMFPQSRSRHSFNKSLIHSQRSYSSSHRDDHS   |
| Q24247 | DILNMPALSEAQVVVKARLWNS TLVSEYPRVERVRI FSTAT |
| P08514 | APPAWALNDPVQLTFYAGPNGSQFGFSLDFHKD SHGRVAI   |
| P08514 | EYFDGYWGYSAVGEFDGLNTEYVVGAPTWSWTLGAVEI      |
| P08514 | AFLRDEADFRDKLSPIVLSLNVSLPPEAGMAPAVVLHGDT    |
| P08514 | MRALSNVEGFERLICNQK KENETRVLCELGNPMKKNAQIG   |
| P08514 | LPSLYQRPLDQFVLQSHAWFNSSLPYAVPPLSLPRGEAQV    |
| P17301 | VDLSTATCEKLNLTSTSI PNVTMKTNMSLGLILTRNMG     |
| P17301 | CEKLNLTSTSI PNVTMKTNMSLGLILTRNMG TGGFLTCG   |
| P17301 | KNLIKEIKAIASIPTERYFFNVSDAALLEKAGTLGEQIFS    |
| P17301 | TSHGHLIFPKQAFDQILQDRNHSSYLGYSVAAISTGESTHF   |
| P17301 | SVAAISTGESTHFVAGAPRANYTGQIVLYSVNENGNITVIQ   |
| P17301 | GAPRANYTGQIVLYSVNENGNITVIQ AHRGDQIGSYFGSVL  |

|        |                                             |
|--------|---------------------------------------------|
| P17301 | LCFSAKFRPTKQNNQVAIVYNIITLDADGFSSRVTSRGLFKE  |
| P17301 | FKSENFHRHTKELNCRITASCSNVTCWLKDVHMKGEYFVNVTT |
| P17301 | SCSNVTCWLKDVHMKGEYFVNVTTTRIWNNGTFASSTFQTVQL |
| P17301 | WLKDVHMKGEYFVNVTTTRIWNNGTFASSTFQTVQLTAAAEIN |
| O44386 | NFMPPRSRVINSPKHLKFHINQTRSSYFGYTLVIRQTSIIV   |
| O44386 | TSIIVGAPRAQSTLESQRTINETGAIYRCSLTNGVCSPYVL   |
| O44386 | PRFYAPSSRDNLHGVICYVWNNTVASTPQHVTRISPLRLKS   |
| O44386 | LGDIINHGDYNDVAVGAPFAGNGTVFIYLGSENGLRDQPSQR  |
| O44386 | TLRLNIEITNIGETAYLPQFNVTSTRLAFQVPGNCKVVD     |
| O44386 | SFYIPIAYKVAGSTAIPIIINVTSLKMQASYDSQLLSIDL    |
| O44386 | SLKMQASYDSQLLSIDLQDNNTMLVVDPEVTTLSGGLE      |
| O44386 | ISNVKAHDLSDDFKGLFVNRTIVFNCRDPEMTCVRAEM      |
| Q62470 | QRYLLLAGAPRDLAVGDDYTNRGTAVYLCPLTAHKDDCERM   |
| Q62470 | LDPALCTATSCVQVELCFAYNQSAGNPNYRRNITLAYTLEA   |
| Q62470 | VQVELCFAYNQSAGNPNYRRNITLAYTLEADRDRPRLRF     |
| Q62470 | LELLLMDNVRDKLRPIVIAMNYSPLRMPDRLKGLRSLDA     |
| Q62470 | LRMPDRLKGLRSLDAYPVLNQAQAMENHTEVHFQKECGPD    |
| Q62470 | KLGLRSLDAYPVLNQAQAMENHTEVHFQKECGPDNKCDNL    |
| Q62470 | LQPLSRLQYSRDTKKLFLSINVTNSPSSQRAGEDAHEALLT   |
| Q62470 | EVPSALLSSVRPSGTCQANNETIICELGPNPFKRNQRMELL   |
| Q62470 | PYEVTVNGKWLLYPTEITIHNSGWSWPCQPSGNLVNPLNLTLS |
| Q62470 | TIHNSGWSWPCQPSGNLVNPLNLTLSDPGVTPSPQRRRQQL   |
| Q62470 | TCSNGRARCWLECPDPDTSNITNVTVKARVWNSTFIEDYK    |
| Q62470 | NGRARCWLECPDPDTSNITNVTVKARVWNSTFIEDYKDFD    |
| Q62470 | ECPLDTSNITNVTVKARVWNSTFIEDYKDFDRVRVDGWAT    |
| Q62470 | RVDGWATLFLRTSIPTINMENKTTWFSVDIDSELVEELPAE   |
| P13612 | HSHGANRWLLVGAPTANWLANASVINPGAIRCRIGKNFGQ    |
| P13612 | CLEERDNQWLVTLRQPGENGSIIVTCGHRWKNIIFYIKNEN   |
| P13612 | DLIVMGAPGSSYWTGSLFVYNIITNKYKAFLDKQNVKFGS    |
| P13612 | LLRTRPVVIVDASLSHPESVNRTKFDCVENGWPSVICDLTL   |
| P13612 | LTLCFYSYKGEVPGYIVLFYNMSLDVNRKAESPFRFYFSSN   |
| P13612 | NMSLDVNRKAESPFRFYFSSNGTSDVITGSIQVSREANCR    |
| P13612 | KKEKDIMKKTINFARFAHENCADLQVSAKIGFLKPHENK     |
| P13612 | ENCADLQVSAKIGFLKPHENKTYLAVGSMKTLMLNVSLFN    |
| P13612 | LKPHENKTYLAVGSMKTLMLNVSLFNAGDDAYETTLHVKLP   |
| P13612 | SFVYGSNDENEPETCMVEKMNLTFHVINTGNSMAPNVSVEI   |
| P13612 | MVEKMNLTFHVINTGNSMAPNVSVEIMVPNSFSPQTDKLFN   |
| P08648 | VEFYRPGTDGVSVLVGAOKANTSQPGVLQGGAVYLCWPWAS   |
| P08648 | WRTEKEPLSDPVGTCYLSITDNFTRILEYAPCRSDFSWAAGQ  |
| P08648 | AVGEFSGDDTEDFVAGVPKGNLTYGYVTILNGSDIRSLYNF   |
| P08648 | EDFVAGVPKGNLTYGYVTILNGSDIRSLYNFSGEQMASYFG   |

|        |                                            |
|--------|--------------------------------------------|
| P08648 | GNLTYGYVTILNGSDIRSLYNFSGEQMASYFGYAVAATDVN  |
| P08648 | AMFNPEERSCSLEGPNVACINLSFCLNASGKHVADSIGFTV  |
| P08648 | ERSCSLEGPNVACINLSFCLNASGKHVADSIGFTVELQLDW  |
| P08648 | TLLIQNGAREDCREMKIYLRNESEFRDKLSPIHIALNFSLD  |
| P08648 | IYLRNESEFRDKLSPIHIALNFSLDPQAPVDSHGLRPALHY  |
| P08648 | LQLEVFGEQNHVYLGDKNALNLTFHAQNVGEGGAYEAEALRV |
| P08648 | ELRVTAPEAEYSGLVRHPGNFSSLSCDYFAVNQSRLLVCD   |
| P08648 | SGLVRHPGNFSSLSCDYFAVNQSRLLVCDLGNPMKAGASLW  |
| P08648 | VPHLRDTKTKTIQDFQILSKNLNNSQSDVVSFRLSVEAQAQ  |
| P08648 | HLRDTKTKTIQDFQILSKNLNNSQSDVVSFRLSVEAQAQVT  |
| P08648 | SCPQALEGQQLLYVTRVTGLNCTTNHPINPKGLELDPEGSL  |
| P11688 | VEFYRPGRDGVSVLVGAPKANTSQPGVLQGGAVYVCPWGT   |
| P11688 | WRTEKDPQNDPVGTCYLSSTENFTRILEYAPCRSDFGSAAGQ |
| P11688 | AVGEFSGDDTEDFVAGVPKGNLTYGYVTVLNGSDIHSLYNV  |
| P11688 | EDFVAGVPKGNLTYGYVTVLNGSDIHSLYNVSGEQMASYFG  |
| P11688 | GNLTYGYVTVLNGSDIHSLYNVSGEQMASYFGYAVAATDTN  |
| P11688 | SMFNPEERSCSLEGPNVSCINLSFCLNASGKHVPNSIGFEV  |
| P11688 | ERSCSLEGPNVSCINLSFCLNASGKHVPNSIGFEVELQLDW  |
| P11688 | TLLIQNGAREDCREMKIYLRNESEFRDKLSPIHIALNFSLD  |
| P11688 | IYLRNESEFRDKLSPIHIALNFSLDPKAPMDSHGLRPVLHY  |
| P11688 | VPDLQLDVYGEKKHVYLGDKNALNLTFHAQNLGEGGAYEAE  |
| P11688 | LQLDVYGEKKHVYLGDKNALNLTFHAQNLGEGGAYEAEALRV |
| P11688 | EKKHVYLGDKNALNLTFHAQNLGEGGAYEAEALRVTAPEAE  |
| P11688 | ELRVTAPEAEYSGLVRHPGNFSSLSCDYFAVNQSRQLVCD   |
| P11688 | SGLVRHPGNFSSLSCDYFAVNQSRQLVCDLGNPMKAGTSLW  |
| P11688 | HLQDTKTKTIQDFQILSKNLNNSQSNVVSFPLSVEAQAQVS  |
| P11688 | CPQALEGQQLLYVTKVTGLSNCTSNYTPNSQGLELDPETSP  |
| P11688 | LEGQQLLYVTKVTGLSNCTSNYTPNSQGLELDPETSPHHLQ  |
| P23229 | DKRLLVGAPRAEALPLQRANRTGGLYSCDITARGPCTRIE   |
| P23229 | IVFGAPGTYNWKGIVRVEQKNNTFFDMNIFEDGPYEVGGET  |
| P23229 | SGKGIVSKDEITFVSGAPRANHSGAVVLLKRDMSAHLLEPE  |
| P23229 | AVYVYMNQQGRWNNVKPIRLNGTKDSMFGIAVKNIGDINQD  |
| P23229 | SAYRELRAFPEKQLSCVANQNGSQADCELGPNFKRNSNVTF  |
| P23229 | ANQNGSQADCELGPNFKRNSNVTFYLVLSTTEVTFDTPDL   |
| P23229 | VESKGLEKVTCEPQKEINSLNLTESHNSRKKREITEKQIDD  |
| P23229 | KQIDDNRKFSLFAERKYQTLNCSVNVNCVNIIRCPLRGLDSK |
| P23229 | RCPLRGLDSKASLILRSRLWNSTFLEEYSKLNLYDLIMRAF  |
| Q61739 | DKRLLVGAPRAEALPLQRANRTGGLYSCDITSRGPCTRIE   |
| Q61739 | IVFGAPGTYNWKGIVRVEQKNNTFFDMNIFEDGPYEVGGET  |
| Q61739 | SGKGIVSKDDITFVSGAPRANHSGAVVLLKRDMSAHLLEPE  |
| Q61739 | AVYVYINQQGKWSNVKPIRLNGTKDSMFGISVKNIGDINQD  |

|        |                                             |
|--------|---------------------------------------------|
| Q61739 | SAYRELRAFPEKQLSCVANQNGSQADCELGNPFFKRNSSVTF  |
| Q61739 | CVANQNGSQADCELGNPFFKRNSSVTFYLILSTTEVTFDTTD  |
| Q61739 | KQIDDSRKFSLFFPERKYQTLNCSVNVRCVNI RCPLRGLDSK |
| Q61739 | RCPLRGLDSKASLVLRSLWNSTFLEEYSKLNLYLDILLRAS   |
| Q13683 | PQSWLLVGAPQALALPGQQANRTGGLFACPLSLEETDCYRV   |
| Q13683 | HYSGVRALDPAEKPLCLSNENASHVECELG NPMKRGAVTF   |
| Q13683 | GERQEPSMSWPFVSSAEKKNI TLDCARGTANCVVFSCLY    |
| Q13683 | SCPLYSFDRAAVLHVWGRLWNSTFLEEYS AVKSLEVI VRAN |
| Q13683 | NSTFLEEYS AVKSLEVI VRANITVKSSIKNMLRDASTVIP  |
| Q61738 | PQSWLLVGAPQALALPGQQANRTGGLFACPLSLEETDCYRV   |
| Q61738 | SLRYSGVRALDSVEKPLCLSNDSASHVECELG NPMKRGAV   |
| Q61738 | PPEKVEPSTSWPVS SAEKRNTLDCPRTAKCVVFSCLYS     |
| Q61738 | SCPLYSFDRAAVLHVWGRLWNSTFLEEYMAVKSLEVI VRAN  |
| Q61738 | NSTFLEEYMAVKSLEVI VRANITVKSSIKNLLRDASTVIP   |
| Q13797 | ELVVMGAPGSFYWAGTIKVLNLT DNTYLKLNDEVIMNRRYT  |
| Q13797 | LLRARPVITVDVSIFLPGSINITAPQCHDGQPVNCLNVTT    |
| Q13797 | GSINITAPQCHDGQPVNCLNVTT CFSFHGKHVPGEIGLNY   |
| Q13797 | ELPPLTPVLRWKKGQKIAQKNQTV FERNCRSEDCAADLQLQ  |
| Q13797 | KLLLSSMDEKTYLALGAVKNI SLNISISNLGDDAYDANVS   |
| Q13797 | SSMDEKTYLALGAVKNI SLNISISNLGDDAYDANVSFNVS   |
| Q13797 | VKNISLNISISNLGDDAYDANVSFNVSRELFFINMWQKEEM   |
| Q13797 | SLNISISNLGDDAYDANVSFNVSRELFFINMWQKEEMGISC   |
| Q13797 | SVDAANFIQLDDLECHFQPINITLQVYNTGPSTLPGSSVSI   |
| Q13797 | SSGGAEMFHVQEMVVGQEKGNCSFQKNPTPCIIPQE QENIF  |
| Q13797 | SGRKVLDCEKPGISCLTAHCNFSALAKEESRTIDIYMLLNT   |
| P20701 | FGYRVLQVGNVIVGAPGEGNSTGSLYQCQSGTGHC LVPVTL  |
| P20701 | SLYQCQSGTGHC LVPVTLRGSNYTSKYLGMTLATDPTDGSIL |
| P20701 | QPDEFQKILDFMKDVMKLSNTSYQFAAVQFSTS YKTEFDF   |
| P20701 | IPVHEVECSYSTSNMKKEGVNITICFQIKSLIPQFQGR LVA  |
| P20701 | ITICFQIKSLIPQFQGR LVANLTYTLQLDGHRTRRRGLFPG  |
| P20701 | SCTDFS FHFVVCVQDLISPINVSLNFS LWEEEGTPRDQRAQ |
| P20701 | FSFHFVVCVQDLISPINVSLNFS LWEEEGTPRDQRAQKDI   |
| P20701 | PVSCEELPEESRLLSRALSCNVSSPIFKAGHSVALQMMFNT   |
| P20701 | SPIFKAGHSVALQMMFNTLVNS SWGDSVELHANVTCNNEDS  |
| P20701 | QMMFNTLVNS SWGDSVELHANVTCNNEDSDLLEDNSATTII  |
| P20701 | VGEIEASSMFLCSSLSISFNSSKHFLYGSNASLAQVVMK     |
| P20701 | LCSSLSISFNSSKHFLYGSNASLAQVVMKVDVVYEKQMLY    |
| P11215 | CDYSTGSCEPIRLQVPVEAVNMSLGLSLAATTSP PQLLACG  |
| P11215 | QLLGRTHATGIRKVVRELFNITNGARKNAFKILVVITDGE    |
| P11215 | SYDWAGGVFLYTSKEKSTFINMTRVDSMDNDAYLGYAAAI I  |
| P11215 | KGTQIGAYFGASLCSVDVDSNGSTDLVLIGAPHYEQTRGG    |

|        |                                            |
|--------|--------------------------------------------|
| P11215 | SVVTYDLALDSGRPHSRAVFNETKNSTRRQTQVLGLTQTCE  |
| P11215 | YDLALDSGRPHSRAVFNETKNSTRRQTQVLGLTQCETLKL   |
| P11215 | LKLQLPNCIEDPVSPIVLRLNFSLVGTPLSAFGNLRPVLAE  |
| P11215 | SITFSFMSLDCLVGGPREFNVTVTVRNDGEDSYRTQVTF    |
| P11215 | KSTSCSINHPIFPENSEVTFNITFDVDSKASLGNKLLKAN   |
| P11215 | NITFDVDSKASLGNKLLKANVTSENNMPRTNKTEFQLELP   |
| P11215 | LGNKLLKANVTSENNMPRTNKTEFQLELPVKYAVYVMTS    |
| P11215 | PVKYAVYVMTSHGVSTKYLNFNTASENTRSRVQHQYQVSNL  |
| P11215 | YVVVTSHGVTKYLNFNTASENTRSRVQHQYQVSNLQQRSLP  |
| P11215 | SNLQQRSLPISLVFLVPVRLNQTIVWDRPQVTFSENLSSTC  |
| P11215 | VPVRLNQTIVWDRPQVTFSENLSSTCHTKERLPSHSDFLAE  |
| P11215 | KERLPSHSDFLAELRKAPVNCIAVQCRIQCDIPFFGIQE    |
| P11215 | IAVQCRIQCDIPFFGIQEENATLKGNSFDWYIKTSHNHL    |
| P11215 | IQCDIPFFGIQEENATLKGNSFDWYIKTSHNHLIVSTA     |
| P11215 | WYIKTSHNHLIVSTAEILFNDSVFTLLPGQGAFVRSQTET   |
| P06756 | DFVPSASRMFLLVGAPKANTQPGIVEGGQVLKCDWSST     |
| P06756 | VSGVPRAARTLGMVYIYDGKNMSSLYNFTGEQMAAYFGFSV  |
| P06756 | AARTLGMVYIYDGKNMSSLYNFTGEQMAAYFGFVAATDIN   |
| P06756 | RPVITVNAGLEVYPSILNQDNKTCSLPGTALKVSCFNVRFC  |
| P06756 | QKGAIRRALFLYRSRSPSHSKNMTISRGGLMQCELIAYLRD  |
| P06756 | YRTAADTTGLQFIPLNQFTPANISRQAHILLDCGEDNVCKPK |
| P06756 | IGVVRNNEALARLSCAFKTENQTRQVVDLGNPMKAGTQLL   |
| P06756 | NGPSSFSKAMLHLQWPYKYNNTLLYILHYDIDGPMNCTSD   |
| P06756 | YKYNNTLLYILHYDIDGPMNCTSDMEINPLRIKISSLQTT   |
| P06756 | SDMEINPLRIKISSLQTTTEKNDTVAGQGERDHLITKRDAL  |
| P06756 | AILYVKSLWTETFMNKENQNHYSYLSKSSASFNVIEFPYKN  |
| P06756 | SASFNVIEFPYKNLPIEDITNSTLVTTNVTWGIQAPMPVFP  |
| P06756 | EFYKNLPIEDITNSTLVTTNVTWGIQAPMPVFPVWVILA    |
| P43406 | DFFEPTSSRMFLLVGAPKANTQPGIVEGGQVLKCECSSS    |
| P43406 | VSGVPRAARTLGMVYIYDGKNMSSLHNFTGEQMAAYFGFSV  |
| P43406 | AARTLGMVYIYDGKNMSSLHNFTGEQMAAYFGFVAATDIN   |
| P43406 | QRTAADATGLQFIPLNQFTFANVSRQAHILLDCGEDNVCKPK |
| P43406 | IGVVRNNEALARLSCAFKTENQTRQVVDLGNPMKAGTQLL   |
| P43406 | NGPSSFSKAILNLQWPYKYNNTLLYILHYDIDGPMNCTAD   |
| P43406 | YKYNNTLLYILHYDIDGPMNCTADTEINPLRIKTPEKNDT   |
| P43406 | PMNCTADTEINPLRIKTPEKNDTAAAGQGERNHLITKRDLT  |
| P43406 | KSAILYVKSLWTETFMNKENQNHYSYLSKSSASFNIEFPY   |
| P43406 | AILYVKSLWTETFMNKENQNHYSYLSKSSASFNIEFPYKN   |
| P43406 | SASFNIEFPYKNLPIEDLNFNSTLVTTNITWGIQAPMPVFP  |
| P43406 | EFYKNLPIEDLNFNSTLVTTNITWGIQAPMPVFPVWVILA   |
| P20702 | VVQYANSWVVVGAPQKITAANQTGGLYQCGYSTGACEPIGL  |

|        |                                            |
|--------|--------------------------------------------|
| P20702 | CGYSTGACEPIGLQVPEAVNMSLGLSLASTTSPSQLLACG   |
| P20702 | SFTWSGGAFLYPPNMSPTFINMSQENVMDRDSYLYGSTELA  |
| P20702 | LDLALDPGRLSFRATFQETKNRSLSRVRVLGLKAHCENFNL  |
| P20702 | FNLLLPSCVEDSVTPITLRLNFTLVGKPLLAFRNLRPMLAA  |
| P20702 | LATFDVSPKAVLGDRLLLTANVSSENNTPRTSKTTFQLELP  |
| P20702 | PVKYAVYTVVSSHEQFTKYLNFSESEEKESHVAMHRYQVNN  |
| P20702 | FRCDVPSFSVQEELDFTLKGNSLFGWVRQILQKKVSVVVA   |
| P05556 | ANAKSCGECIQAGPNCGWCTNSTFLQEGMPTSARCDLEAL   |
| P05556 | GCPPDDIENPRGSKDIKKNKVNTRSKGTAEKLPEDITQI    |
| P05556 | PDDIENPRGSKDIKKNKVNTRSKGTAEKLPEDITQIQPQ    |
| P05556 | VMPYISTTAKLRNPCTSEQNCTSFFSYKNVLSLTNKGVEF   |
| P05556 | EGGFDAIMQVAVCGSLIGWRNVTRLLVFDAGFHFAGDGK    |
| P05556 | PVYKELKNLIPKSAVGTLSANSNVIQLIIDAYNSLSSEVI   |
| P05556 | I LENGKLESEVTISYKSYCKNGVNGTGNGRKCNSISIGDE  |
| P05556 | NGKLESEVTISYKSYCKNGVNGTGNGRKCNSISIGDEVQF   |
| P05556 | EGVTISYKSYCKNGVNGTGNGRKCNSISIGDEVQFEISIT   |
| P05556 | YKSYCKNGVNGTGNGRKCNSISIGDEVQFEISITSNKCPK   |
| P05556 | ICECECQSEGIPESPKCHEGNGTFECGACRCNEGRVGRHCE  |
| P05556 | CECSTDEVNSEMDAYCRKENSSEICSNNGECVCGQCVRK    |
| P05556 | NGLICGGNGVCKCRVCECPNYTGSACDCSLDTSTCEASNG   |
| P05556 | CRAFNGEKKDTCTQECSEYFNITKVESRDKLPQVPQDPVVS  |
| P09055 | ANAKSCGECIQAGPNCGWCTNSTFLQEGMPTSARCDLEAL   |
| P09055 | GCQPSDIENPRGSQTIKKNKVNTRSKGMAEKLRPEDITQI   |
| P09055 | PSDIENPRGSQTIKKNKVNTRSKGMAEKLRPEDITQIQPQ   |
| P09055 | VMPYISTTAKLRNPCTSEQNCTSFFSYKNVLSLTDGRGEFF  |
| P09055 | EGGFDAIMQVAVCGSLIGWRNVTRLLVFDAGFHFAGDGK    |
| P09055 | PVYKELKNLIPKSAVGTLSGNSNVIQLIIDAYNSLSSEVI   |
| P09055 | KELKNLIPKSAVGTLSGNSNVIQLIIDAYNSLSSEVILEN   |
| P09055 | AVGTLSGNSNVIQLIIDAYNSLSSEVILENSKLPDGVNTIN  |
| P09055 | NSKLPDGVNTINYKSYCKNGVNGTGNGRKCNSISIGDEVQF  |
| P09055 | YKSYCKNGVNGTGNGRKCNSISIGDEVQFEISITANKCPN   |
| P09055 | ICKCNCQSHGIPASPKCHEGNGTFECGACRCNEGRVGRHCE  |
| P09055 | CECSTDEVNSEMDAYCRKENSSEICSNNGECVCGQCVRK    |
| P09055 | NGLICGGNGVCRVCECPNYTGSACDCSLDTGPCLASNG     |
| P09055 | CRAFNGEKKDTCAQECSEHFNLTKVESREKLPQVPQVDPVT  |
| P05107 | VSSCRECIESGPGCTWCQKLNFTGPGDPDSIRCDTRPQLLM  |
| P05107 | KQLSPQKVTLYLRLPGQAAAFNVTFRRAKGYPIDLYYLMDS  |
| P05107 | PNKEKECQPPFAFRHVLKLTNNSNQFQTEVGKQLISGNLDA  |
| P05107 | NKEKECQPPFAFRHVLKLTNNSNQFQTEVGKQLISGNLDAP  |
| P05107 | EKECQPPFAFRHVLKLTNNSNQFQTEVGKQLISGNLDAPEG  |
| P05107 | EGGLDAMMQVAACPPEEIGWRNVTRLLVFATDDGFHFAGDGK |

|        |                                             |
|--------|---------------------------------------------|
| P05107 | CECQTQGRSSQELEGSCRKDNNSIICSGLGDCVCGQCLCHT   |
| P05107 | CGKYISCAECLKFEKGFPGKNCSAACPLQLSNNPVKGRTC    |
| P05106 | QVTQVSPQRIALRLRPDDSKNFSIQVRQVEDYPVDIYYLMD   |
| P05106 | SQKNINLI FAVTENVVNLQNYSELI PGTTVGVLSMDSNV   |
| P05106 | IRSKVELEVRDLPEELSLSFNATCLNNEVIPGLKSCMGLKI   |
| P05106 | DCDCACQAQAEFNSHRCNNGNGTFECGVCRCGPGWLSQCE    |
| P05106 | HGQCSCGDCLCDSJWTGYCNCCTTRTDTCMSSNGLLCSGRG   |
| P05106 | YCRDEIESVKELKDTGKDAVNCTYKNEDDCVVRFQYYEDSS   |
| P16144 | VPTLVRLAKHNIIPIFAVTNYSYSYIEKLHTYFPVSSLGV    |
| P16144 | NGDFVCGQCVCSEGWGQTCNCSTGSLSDIQPCLREGEDKP    |
| P16144 | MGQCVCEPGWTGPSDCPLSNATCIDSNGGICNGRGHCECG    |
| P16144 | ECGRCHCHQOSLYTDTICEINYSAIHPGLCEDLRSCVQCQA   |
| P16144 | DEDDCTYSYTMEDGAGPNSSTVLVHKKKDCPPGSFWWLI     |
| Q9GYK2 | WCIDPHSSLTNRCLKSKFTNETCTPHLVYSPQTAQVKIQQ    |
| Q9GYK2 | CPLASHGVSKASELEDKCRFNSSSPVCSASGKCKCGQCQN    |
| Q9GYK2 | KCGQCQCNKPTVTGKFCQCDNDSCPLAVNGKVCSENGVDC    |
| P11584 | TEGCAWCMQPDFKGQSRCYQNTSSLCPEEFAYSPITVEQIL   |
| P11584 | EHPCENCKAPYGYQNHMPLNNTESFSNEVKNATVSGNLDA    |
| P11584 | GYQNHMPLNNTESFSNEVKNATVSGNLDAPEGGFDAIMQA    |
| P11584 | LSVYEKLVHEIQSSAAKLDNDSSNVVELVKEEYRKISSSV    |
| P11584 | VVELVKEEYRKISSSVEMKDNATGDVKITYFSSCLNSGPEV   |
| P11584 | DSYFGNKCECSATDLTSKFANDTSCRADSTSTTDCSGRGHC   |
| P11584 | ECHKRPNPIEIIISGKHCECDNFSCERNRNQLCSGPDHGTCE  |
| P11584 | CGRCKCKPGWTGSNCGCQESNDTCMPPGGGEICSHGHTCEC   |
| P11584 | CVQCQMYKTGELKNGDDCARNCTQFVPVGVKEVEIDETKDE   |
| Q8C0Z1 | FLALGDINKDKVDVFLYKNTNSNNLTRSCADEGFSTPC      |
| Q8C0Z1 | ALGDINKDKVDVFLYKNTNSNNLTRSCADEGFSTPCAF      |
| Q8C0Z1 | DINKDKVDVFLYKNTNSNNLTRSCADEGFSTPCAFVVA      |
| Q8C0Z1 | INKDKVDVFLYKNTNSNNLTRSCADEGFSTPCAFVVAV      |
| Q8C0Z1 | ERITGRDGHFKEDPYWENMLNHSVHRRLLHRLGAVRYLMNI   |
| Q8C0Z1 | VLRKPI LGHYKPD TLAVVIENGTS IDRQILLDLSTGSILW |
| Q8C0Z1 | VQHSLYMFHPTLPGILLELANVSANIVAFDAVLLPEPSRHAA  |
| Q9H0X4 | AVDDINGDRIQDVFLYKNTNSNNFSRSCVDEGFSSPCTF     |
| Q9H0X4 | EKVTGSGGPFKSDPHWESMLNATRRMLSHSSGAVRYLMHV    |
| Q9H0X4 | VLRKPIFGRYKPD TLAVAVENGTGTRQILFLDLGTGAVLC   |
| Q9H0X4 | ARHSLYMFHPTLPRVLELANVSTHIVAFDAVLFEPSPRHAA   |
| Q0VCM5 | YLTIQELLAKRMKLEGQEKANVSAKALQMSLAYQFVTPLTS   |
| Q0VCM5 | FGRLGIANPATDFQLEVT PQNITLNPGGGPPVFSWRDQAVL  |
| P19827 | DKICDLLVANNHFAHFFAQNLTMNKNVVFVIDISGSMRG     |
| P19827 | YLTIQELLAKRMKVDREERANLSSQALQMSLDYGFVTPLTS   |
| P19827 | FGRLGIANPATDFQLEVT PQNITLNPGGGPPVFSWRDQAVL  |

|        |                                              |
|--------|----------------------------------------------|
| Q61702 | DKLCDLLVANNYFTHFFAPKNLTNMSKNLVFVIDISGSMEG    |
| Q61702 | CDLLVANNYFTHFFAPKNLTNMSKNLVFVIDISGSMEGQKV    |
| Q61702 | YLTIQELLAKRMKTEGEERANLSSQVLKMSLDYHFVTPPLTS   |
| P19823 | KVQSTITSRMATMIQSKVNNSPQPQNVVFDVQIPKGAFI      |
| P19823 | SPQPQNVVFDVQIPKGAFISNFSMTVDGKTRSSIKEKTVG     |
| P19823 | TVGELKLSKIQKNVKENIQDNISLFSLSLGMGFDVDYDFLKRL  |
| Q61703 | KVQSTITSRVATTTIQSKLVNNSPLQSVVFDVQIPKGAFI     |
| Q61703 | SPLPQSVVFDVQIPKGAFISNFTMTVNGMTFTSSIKEKTVG    |
| Q61703 | GQQKAHVSEFKPTVAQQRKCPNCTETAVNGELVVMYDVNREE   |
| Q61703 | TVGELKLSKIQKNVQSIQDNISLFSLGIGFDVDYDFLKRL     |
| Q61704 | ADTAKEVSFDVELPKTAFITNFTLITIDGVTYPGNVKEKEVA   |
| Q61704 | YLTIEQLLEKRKNAKGDEKENITAEALDLSLKYHFVTPPLTS   |
| Q06033 | ADTAKEVSFDVELPKTAFITNFTLITIDGVTYPGNVKEKEVA   |
| Q06033 | YLTIEQLLEKRKNAHGEEKENLTARALDLSLKYHFVTPPLTS   |
| Q14624 | ANTVQEATFQMELPKKAFITNFSMIDGMTYPGIKEKAEA      |
| Q14624 | LETESTFMTNQLVDALTTWQNKKAHIRFKPTLSQQKSPE      |
| Q14624 | IENGYFVHYFAPEGLTTPKKNVVFVIDKSGSMSGRKIQQTR    |
| Q14624 | LQDRGPDVLTATVSGKLPQNIPTQTESSVAEQEAEFQSPK     |
| Q14624 | LEQTVSASDADQALRNQALNLSLAYSFVTPPLTSMVVTKPD    |
| Q3T052 | ADAVREATFQMELPKKAFITNFSMIDGVTYPGNIKEKAAA     |
| Q3T052 | LETESTFMTNKLAEALTTSONKKAHVRFKPTLSQQKYPE      |
| Q3T052 | LREQSPDVLLAQIRGQLHRENIYMMMSHVAEQEEMFRSPK     |
| A6X935 | ADAVQEATFQVELPRKAFITNFSMIDGVTYPGVVEKAEA      |
| A6X935 | LQDQGPVLLAKVSGQMHMQNITFQTEASVAQQEKEFKSPK     |
| A6X935 | LEQRISASGAELEALEAQLNLSLKYNFVTPPLTHMVVTKPE    |
| A6X935 | KVTIGLGLSDDPQRGLMLLLNDTQHFSNNVKGELGQFYRDI    |
| Q9Y287 | NKKLTAYLDLNLDKCYVILNNTSIVMPPRNLELLINIKAG     |
| Q14643 | GESLASEFLFSDVCRVESGENCSSPAPREELVPAEETEQDK    |
| Q9D9J7 | LSWHRASKGLTDYSFYRVWENSSETLIAKGKEPYLTKSMVG    |
| Q9Y624 | TWFKDGIIVMPTNPKSTRAFSNSSYVLNPTTGELVFDPLSAS   |
| Q9Y624 | IVMPTNPKSTRAFSNSSYVLNPTTGELVFDPLSASDTGEYS    |
| O88792 | SLVQKGSVYTAQSDVQVFENESIKLCTYSGFSSPRVEWK      |
| O88792 | WFKDGI SMLTADAKKTRAFMNSSFTIDPKSGDLIFDPVTAF   |
| Q9D8B7 | IQGDLAGRTDVFVGKTSLR IWNVTRSDSAIYRCEVVALNDRK  |
| Q9D8B7 | SWYRNDVPLPTDSRANPRFQNSSFHVNSETGTLVFNVAHKD    |
| Q9D8B7 | VPLPTDSRANPRFQNSSFHVNSETGTLVFNVAHKDDSGQYY    |
| P57087 | TLQGDFKNRAEMIDFNIRIKNVTRSDAGKYRCEVSAPSEQG    |
| P57087 | TWFKDGI RLENPRLGSQSTNSSYTMNTKTGTLQFNTVSKL    |
| P57087 | ARNSVGYRRCPGKRMQVDDLNI SGI IAAVVVVVALVISVCGL |
| Q9BX67 | IQGDLAGRAEILGKTSLK IWNVTRSDSALYRCEVVARNDRK   |
| Q9BX67 | SWYRNDVPLPTDSRANPRFRNSSFHLNSETGTLVFTAVHKD    |



|        |                                             |
|--------|---------------------------------------------|
| Q9BX67 | VPLPTDSRANPRFRNSSFHLNSETGTLVFTAVHKDDSGQYY   |
| Q80UL9 | DWLFKDKDDASEYVLFYYSNLSVPTGRFQNRSHLVGDTFH    |
| Q80UL9 | ASEYVLFYYSNLSVPTGRFQNRSHLVGDTFHNDGSLLLQDV   |
| Q80UL9 | LLQDVQKADEGIYTCEIRLKNESMVMKPKVELWVLPPEPKD   |
| Q8BI36 | AVDIQPACLGLYCGKTLFLKNGSSEIYEGCGVCPRGQRTNA   |
| Q6NSJ0 | AFGGILERYWLSRRAAAIKVNDSVFFHLGWNSTERSLRLQA   |
| Q6NSJ0 | LSSRAAAIKVNDSVFFHLGWNSTERSLRLQARYHDTPYKPP   |
| Q6NSJ0 | TEMALPFFSLAEVRVGYQSQNISCFRRLVDRDSVWGYDLGL   |
| Q69ZQ1 | AFGGILERYWLSRRAAAIKVNDSVFFHLGWNSTERSMRLQA   |
| Q69ZQ1 | LSSRAAAIKVNDSVFFHLGWNSTERSMRLQARYHDTSYKPP   |
| Q69ZQ1 | THPEAREWFQGLRRLRLRYNVTSFKFDAGEVSYLPRDFST    |
| P00756 | KDEPSAQHRFVSKAIPHGFNMMLRKHIRFLEYDYSNDLM     |
| Q8IZA0 | ITISSPLTTDLTAELSGGPKNVSVQPEISEGLATTPSTQQV   |
| Q8IZA0 | GLYEFKIVIEGQNAHGEYVNVTVKPEPRKNRPPAIVSPQ     |
| Q8IZA0 | REEKISEDTAIILKLSKLVFGNYTFLTVVDSGATNSTAN     |
| Q8IZA0 | KLVPGNYTFLSLTVVDSGATNSTANLTVNKAVDYPVANA     |
| Q8IZA0 | ANAGPNQVITLFPQNSITLFGNQSTDDHGITSYEWLSLSPSSK |
| P29622 | GLLALSHGQLHVEHDGESCSNSHQIILETGEGPSLSKIAP    |
| P29622 | MLSLGACSHRSRQILEGLGFNLTELSSESDVHRGFQHLHLTL  |
| P29622 | TRVGSALFLSHNLKFLAKFLNDTMAVYEAKLFHTNFYDTVG   |
| P29622 | LWEKPFISSRTPKDFYVDENTTVRVPMLQDQEHHWYLD      |
| Q86W47 | FIFGFCWLPALQDLQATEANCTVLSVQQIGEVFECTFTCG    |
| Q86W47 | FTCGADCRGTSQYPCVQVYVNNSESNRALLHSDEHQLLTN    |
| P63142 | IFRDENEDMHGGGVTFHTYSNSTIGYQQSTSFDPFFIVET    |
| P15384 | FRDEKDYPASPSQDVFEAANNSTSGASSGASSFSDPFFVVE   |
| P08510 | LSIVIFCLETLPFKHYKVFNTTTNGTKIEEDEVDPDITDPF   |
| P08510 | IFCLETLPFKHYKVFNTTTNGTKIEEDEVDPDITDPFFLIE   |
| P15382 | TTAVTPFLTKLWQETVQQGGNMSGLARRSPRSSDGKLEALY   |
| Q12809 | HMSRIGWLHNLGDQIGKPYNSGLGGPSIKDKYVTALYFT     |
| Q9H252 | YLEHKIGWLDSLGVQLGKRYNGSDPASGPSVQDKYVTALYF   |
| P48048 | LLWYAVAYIHKDLPEFHPSANHTPCVENINGLTS AFLFSLE  |
| P48549 | ASMWWVIAYTRGDLNKAHVGNYPVCVANVYVNFPSAFLFFIE  |
| O00180 | LEQFLGRVLEASNYGVSVLSNASGNWNWDFTSALFFASTVL   |
| Q7Z418 | LVAADDGEFEKFEELCRILNCSETVVEDRKQDLQGHQKV     |
| Q6VV64 | AEENPELKKFLDDLCNLIKCNLTVVEGSRKNLCEHLQHLKP   |
| Q7Z4H8 | AAVVLVRYFYLQAVNSEGQNLTRSPAGETPFKVVVKSLSP    |
| Q7Z4H8 | MRGVTDLLSIQNTGPSWINKTERAFFRGRDSREERLQLV     |
| P23276 | PRPCETSVCLDLRDHYLASGNTSVAPCTDFFSFACGRAKET   |
| P23276 | TSVAPCTDFFSFACGRAKETNNSFQELATKNKNRRLRILEV   |
| P23276 | QVIEELGGWRISGKWTSLNFNRTLRLMSQYGHFPPFRAYL    |
| P23276 | TPMSLSPSQSLVVHDVEYLKNMSQLVEEMLLKQRDFLQSHM   |

|        |                                              |
|--------|----------------------------------------------|
| P23276 | AHLCLKRHYAAFPLPSRTSFNDSLTFLENAADVGLAIALQ     |
| O60938 | IWYLYLQNNLIETIPEKPFENATQLRWINLNKNKITNYGIE    |
| O60938 | IQLARNKVSRI PQGTFSNLENLTLLDLQNNKLVDNAFQRDT   |
| O60938 | NALRNMPPRLPANTMQLF LDNNSIEGIPENYFNVIPKVAFL   |
| O60938 | PRISAHLQHLHLDHNKIKSVNVSVICPSPSMLPAERDSFSY    |
| O42235 | IWYLYLQNNLIETISEKPFVNATHLRWINLNKNKITNNGIE    |
| O42235 | LRLARNKISRIPGVSFNLENLTMLDLHQNNLLDSALQSDT     |
| O42235 | NSLKKMPLSIPANTLQLFLDNNSEIPIENYFSAIPKVTFLL    |
| O42235 | TFLRLNYNKLSDDGIPPNGFNVS ILDLQLSHNQLTKI PPI   |
| O42235 | PPINAHLEHLHLDHNRIKSVNGTQICPVSI AVAEDYGLYGN   |
| P09620 | EDADEQDSSDLEYFFWKFTNNDNNGVDRPLI IWLNGGPGC    |
| P09620 | HKSKSTDDSEEFSGYVKYDRNLTFVSVYNASHMVPFDKSLV    |
| P09620 | SEEFSGYVKYDRNLTFVSVYNASHMVPFDKSLVSRGIVDIY    |
| P13134 | SSQQIPLKDHTSRQYFAVESNETLSRLEEMHPNWKYEHQDVR   |
| P13134 | HLVNPSPFGSDINVLDLWYNNITGAGVVAIVDDGLDYENE     |
| P13134 | TSAAAPLAAGVYTLLEANPNLTWRDVQYLSILSAVGLEKN     |
| P13134 | ENVNAQTWFYLP TLYVVSQSTNSTEETLESVITISEKSLQDA  |
| P43629 | HGRIFQESFNMSPVTTAHAGNYTCRGSHPHSPTGWSAPSNP    |
| P43629 | GISKDPSRLVGGIHDGVSKANFSIGPMMALAGTYRCYGSV     |
| P43629 | YHLSREGGAHERRLPAVRKVNRTFQADFFLGPATHGTYRC     |
| Q96J84 | EPADQTVVAGQRAVLPCVLLNYSGIVQWTKDGLALGMGQGL    |
| Q96J84 | PEDTRIDGGPVILLQAGT PHNLT CRAFTNAKPAATIIWFRDG |
| Q96J84 | DYSFFTEPVSCVHNKVGSTNVSTLVNVHFAPRI VVDPKPT    |
| Q96J84 | GVLSTLTINNVMEADFQTHYNCTAWNSFGPGTAI IQLEERE   |
| Q80W68 | EPADQTVVAGQRAVLPCVLLNYSGIVQWTKDGLALGMGQGL    |
| Q80W68 | PEETRIDGGPVILLQAGTPYNLT CRAFTNAKPAATIIWFRDG  |
| Q80W68 | DYSFFTEPVSCVYNKVGSTNVSTLVNVHFAPRI VVYPKPT    |
| Q80W68 | GVLSTLTINNVMEADFQTHYNCTAWNSFGPGTAI IQLEERE   |
| P10721 | FVRDPAKFLVDRSLYGKEDNDTLVRCPLTDPEVTNYSLKG     |
| P10721 | YGKEDNDTLVRCPLTDPEVTNYSLKGCGKPLPKDLRFIPD     |
| P10721 | HHGDFNYERQATLT ISSARVNDSGVFMCIANNTFGSANVTT   |
| P10721 | ATLT ISSARVNDSGVFMCIANNTFGSANVTTTLEVVDKGFI   |
| P10721 | ARVNDSGVFMCIANNTFGSANVTTTLEVVDKGFINI FPMIN   |
| P10721 | NVTTTLEVVDKGFINI FPMINTV FVNDGENVDLIVEYEAF   |
| P10721 | DLIVEYEAFPKPEHQWI YMNRTFTDKWEDYPKSENESENIR   |
| P10721 | QWIYMNRTFTDKWEDYPKSENESENIRYVSELHLTRLKGTGEG  |
| P10721 | CPGTEQRCSASVLPVDVQTLNSSGPPFGKLVVQSSIDSSAF    |
| P10721 | GPPFGKLVVQSSIDSSAFKHNGTVECKAYNDVGKTSAYFNF    |
| P05532 | FGKEDSDALVRCPLTDPOVSNYSLEICDGKSLPTDLTFVVPN   |
| P05532 | ETLT ISSARVDDSGVFMCIANNTFGSANVTTTLKVVEKGF I  |
| P05532 | ARVDDSGVFMCIANNTFGSANVTTTLKVVEKGFINI SPVKN   |

|        |                                              |
|--------|----------------------------------------------|
| P05532 | NVTTTLKVVEKGFINISPVKNTTVFVTDGENVDLVVEYEAY    |
| P05532 | DLVVEYEAYPKPEHQQWIYMNRTSANKGKDYVKS DNKSNIR   |
| P05532 | QWIYMNRTSANKGKDYVKS DNKSNIRYVNQLRLRLKGTGEG   |
| P05532 | CTGAEQRCTTPVSPVDVQVQNVSVSPFGKLVVQSSIDSSVF    |
| P05532 | VSPFGKLVVQSSIDSSVFRHNGTVECKASNDVGKSSAFFNF    |
| Q9UKR0 | SIFLLLCVGLSQAATPKIFNGTECGRNSQPWQVGLFEGTS     |
| Q9UKR0 | SGWGITNHPRNFPDDLQCLNLSIVSHATCHGVYPGRITSN     |
| P06870 | DDENTAQFVHVSESFPHPGFNMSLLENHTRQADEYSHDLM     |
| P06870 | QFVHVSESFPHPGFNMSLLENHTRQADEYSHDLMMLRLTE     |
| P06870 | EEPEVGSTCLASGWSIEFENFSFPDDLQCVDLKILPNDEC     |
| P12323 | EDEDTAQHFLVSQSVPHPDFNMSLEPHNVLPNEDYSHDLM     |
| P12323 | LQCVGLEILPSKNCDDAHIANVTGTMLCAGDLAGKDCVVG     |
| P00759 | QRRLVRQSFRRHPDYIPLIVTNDTEQPVHDHSDMLLHLSE     |
| P00759 | LQCVNIHLLSNEKCIETYKDNVTDVMLCAGEMEGKDCAG      |
| P07288 | VCGGVLVHPQWVLTAAHCIRNKS VILLGRHSLFHPEDTGQV   |
| Q9Y337 | DLGAGAGEDARSDDSSRIINGSDCMHTQPWQAALLLRPN      |
| Q9Y337 | NLMLIKLNRIRPTKDVRPINVSSHCP SAGTKCLVSGWGT     |
| Q9Y337 | SGWGTTSFQVHFQVQLNLSVLSQKRCE DAYPRQIDDT       |
| Q9Y337 | AGDKAGRDSQCQDSGGPVVCGNSLQGLVSWGDYPCARPNRP    |
| P03952 | QISACHRDIYKGVDMRGVNFNVSKVSSVEECQKRCTNNIRC    |
| P03952 | LPEPCHSKIYPGVDFGGEELNVT FVKGVNVCQETCTKMIRC   |
| P03952 | NTGDNSVCTTKTSTRIVGGTNSWGEWPQVSLQVKLTAQR      |
| P03952 | AHCFDGLPLQDVWRIYSGILNLS DITKDTPFSSQIKEIIHQ   |
| P03952 | NYKVSEGNHDIALIKLQAPLNYTEFQKPICLPSKGDSTIY     |
| P26262 | QISACHRDIYKGLDMRGSNFNISKTDNIEECQKLC TNNFHC   |
| P26262 | ALSEIGCPMDIFQHSAFADLNVSQVITPDAFVCRTICTFHP    |
| P26262 | RPEPCHSKIYSGVDFEGEELNVT FVQGADVQETCTKTIRC    |
| P26262 | KLVDSPDC TTKINARIVGGTNASLGEWPQVSLQVKLSQT     |
| P26262 | EYKVSEGNHDIALIKLQTP LNYTEFQKPICLPSKADTNTIY   |
| P14272 | QLSACHQDIYEG LDMRGSNFNISKTDNIEECQKLC TNNIHC  |
| P14272 | ALSEIGCPMDIFQHFAFADLNVSQVVT PDAFVCRTVCTFHP   |
| P14272 | RPEPCHFKIYSGVAFEGEELNAT FVQGADACQETCTKTIRC   |
| P14272 | KVVESSDCTTKINARIVGGTNS SLGEWPQVSLQVKLSQN     |
| P14272 | AHCFDGIYPYD VWR IYGGILNLSEITNKTPFSSIKELI IHQ |
| P14272 | IPYD VWR IYGGILNLSEITNKTPFSSIKELI IHQKYKMSE  |
| P14272 | KYKMSEGSYDIALIKLQTP LNYTEFQKPICLPSKADTNTIY   |
| P01042 | CNDKDLFKAVDAALKKYNSQNQSNQFVLYRITEATKT VGS    |
| P01042 | ISTQSPDLEPTLRHGIQYFNNNTQHSSLFMLNEVKRAQRQV    |
| P01042 | AQRQVVAGLNFRITYSIVQTNCSKENFLFLTPDC KSLWNGD   |
| P01042 | NSPELEETLHTITKLN AENNATFYFKIDNVKKARVQV VAG   |
| O08677 | GTKTDGSPTFYSFKYLIKEGNC SAQSGLAWQDCDFKDAEEA   |

|        |                                            |
|--------|--------------------------------------------|
| O08677 | ISTDSPDLEPVLKHSIEHFNNNTDHSHLFTLRKVKSAHRQV  |
| O08677 | AHRQVVAGLNFDITYTIVQTNCSKERFPSLHGDCVALPNGD  |
| O08677 | NGDDGECRGNLFMDINNKIANFSQSCTLYSGDDLVEALPKP  |
| P01044 | CNDQDVFKAVDAALTKYNSENKSGNQFVLYRITEVARMDNP  |
| P01044 | PDTFYSLKYQIKEGDCPFQSNKTWQDCDYKDSAQAATGECT  |
| P01044 | ISTKSPDLEPVLRYAIQYFNNNTSHSHLFDLKEVKRAQRQV  |
| P01044 | STKSPDLEPVLRYAIQYFNNNTSHSHLFDLKEVKRAQRQVV  |
| P01044 | DLKEVKRAQRQVVGWNYEVNYSIAQTNCSKEEFSFLTDC    |
| P01044 | AQRQVVGWNYEVNYSIAQTNCSKEEFSFLTDCSLSSGD     |
| P01045 | PDTFYSLKYQIKEGDCPFQSNKTWQDCDYKDSAQAATGQCT  |
| P01045 | ISTKSPDLEPVLRYAIQYFNNNTSHSHLFDLKEVKRAQRQV  |
| P01045 | STKSPDLEPVLRYAIQYFNNNTSHSHLFDLKEVKRAQRQVV  |
| P01045 | DLKEVKRAQRQVVGWNYEVNYSIAQTNCSKEEFSFLTDC    |
| P01045 | AQKQVVGWNYEVNYSIAQTNCSKEEFSFLTDCSLSSGD     |
| P01045 | VCVGC PKP IPVDSPDLEEALNHSAKLNAEHDGTFYFKIDT |
| P27809 | SSEVKFGILPKEHWSYPEWINQTKAAEIRADAATKYIYGG   |
| P01596 | PSTLSASVGDRAITCRASQNISSWLAWYQQKPGKAPKVL    |
| P06315 | AETTLTQSPAFMSATPGDKVNISCKASQDIDDDMNWYQK    |
| P32004 | EELGVTVYQSPHSGSFTITGNNSNFAQRFQGIYRCFASNKL  |
| P32004 | ERVMTGQNGNLYFANVLTSDNHSYICHAHFPGTRTIIQKE   |
| P32004 | LRVKATNSMIDRKPRLLFPTNSSHLVALQGGQLVLECIAE   |
| P32004 | IKWLRPSGMPADRVTYQNHKTLQLLKVGEEDDGEYRCLA    |
| P32004 | LLANAYIYVVQLPAKILTADNQTYMAVGSTAYLLCKAFGA   |
| P32004 | QWLDEGTTVLQDERFFPYANGTLGIRDQANDTGRYFCLA    |
| P32004 | QDERFFPYANGTLGIRDQANDTGRYFCLAANDQNNVTIMA   |
| P32004 | RDLQANDTGRYFCLAANDQNNVTIMANLKVKDQITQGP     |
| P32004 | KYFIEDGRLVIHSLDYSQGNYSVASTELDVVESRAQLLV    |
| P32004 | EFEDKEMAPEKWYSLGKVPGNQTS TTLKLSPVHYTFRVTA  |
| P32004 | TVVTPEAAPEKNPVDVKGEGNETTNMVI TWKPLRWDWNAP  |
| P32004 | QGTRGPWQEIVSDPFLVVSNTSTFVPYI KVVAVNSQK     |
| P32004 | GYSGEDYPQAIPELEGIEILNSSAVLVKWRPVDLAQVKGHL  |
| P32004 | VLVKWRPVDLAQVKGHLRGYNVTYWREGSQRKHSKRHIHKD  |
| P32004 | GSQRKHSKRHIHKDHVVVPANTTSVILSGLRPYSSYHLEVO  |
| P32004 | DEGGKQLSFLNRDPELRTHNLTDLSPHLRYRFQLQATKE    |
| P32004 | GEAIVREGGTMAISGISDFGNISATAGENYSVSVWPKQEQ   |
| P32004 | GTMALSGISDFGNISATAGENYSVSVWPKQEQCNFRFHIL   |
| P32004 | FKALGEEKGASLSPQYVSYNQSSYTQWDLQPDTDYEIHLF   |
| P32004 | DYEIHLFKERMFHQMAVKTNGTGRVRLPPAGFATEGWFIG   |
| P11627 | EELGVVHHEAPYSGSFTIEGNNNSFAQRFQGIYRCYASNKLG |
| P11627 | ERVSMGQNGDLYFANVLTSDNHSYICNAHFPGTRTIIQKE   |
| P11627 | LRVKPTNSMIDRKPRLLFPTNSSRLVALQGGQLILECIAE   |

|        |                                                                       |
|--------|-----------------------------------------------------------------------|
| P11627 | IKWLHPSDEPMTDRVIYQNHKTLQLLNVGEEDDGEYTCLA                              |
| P11627 | LLANAYIYVVQLPARILTKDNQTYMAVEGSTAYLLCKAFGA                             |
| P11627 | QWLDEEGTTVLQDERFFPYANGTLSIRDLQANDTGRYFCQA                             |
| P11627 | QDERFFPYANGTLSIRDLQANDTGRYFCQAANDQNNVTILA                             |
| P11627 | RDLQANDTGRYFCQAANDQNNVTILANLQVKEATQITQGPR                             |
| P11627 | KYFIEDGKLVIQSLDYSQGNYSVASTELDEVESRAQLLV                               |
| P11627 | EFEDKEMAPEKWFSLGKVPGNQTS TTLKLSPYVHYTFRVTA                            |
| P11627 | SVVTPEAAPEKNPVDVRGEGNETNMMVITWKPLRMDWNAP                              |
| P11627 | QGKQETWRKQTVSDPFLVVSNTSTFVPEYIKVQAVNNQGGK                             |
| P11627 | GYSGEDYPQVSPELEDITIFNSSTVLRWRPVDLAQVKGHL                              |
| P11627 | VLVRWRPVDLAQVKGHLKGYNVTYWWKGSQRKHSKRHIHKS                             |
| P11627 | GSQRKHSKRHIHKS H I V V P A N T S A I L S G L R P Y S S Y H V E V Q    |
| P11627 | TGYLLSYHPVEGESKEQLFFNLSDP ELRTHNL TNLNPDLQY                           |
| P11627 | EGESKEQLFFNLSDP ELRTHNL TNLNPDLQYRFQLQATTQQ                           |
| P11627 | GEAIVREGGTMALFGKPDFGNI SATAGENYSVSVWVPRKGQ                            |
| P11627 | GTMALFGKPDFGNI SATAGENYSVSVWVPRKGQC NFRFHIL                           |
| P11627 | ALPEGKVPDPHQPPQYVSYNQSSYTQWNLQPDTKYEIHLI                              |
| P11627 | KYEIHLIKEKVLHLLHDVKTNGTGPVRVSTTGSFASEGWFI                             |
| Q70KY3 | INTDYEVSPTDGTQSYVFNLEVDNWMGPDGVVKEKVML                                |
| Q70KY3 | NIVANWGDVTEVTVINNLTNGTS IHWHGIHQKDTNLHDGA                             |
| Q70KY3 | DDLVFHTQNNAPPFSDNVLINGTAVNPNTGEGQYANVTLP                              |
| Q70KY3 | DNVLINGTAVNPNTGEGQYANVTLP GKRHLRI LNTSTEN                             |
| Q70KY3 | RHRLRI LNTSTENHFQVSLVNHTMTVIAADMVPVNAMTVDS                            |
| Q70KY3 | VGQRYDVVIDASRAPDNYWFNVTFGGQAACGSLNPHPAAI                              |
| Q70KY3 | DNTLPVALDLTGTPLFVWVKGSDINVDWGP I I D Y I L T G N                      |
| Q70KY3 | NGSDINVDWGP I I D Y I L T G N T S Y P V S D N I V Q V D A V D Q W T Y |
| D0VWU3 | TPGPLVAGNIGDRFQLNVIDNLTNHTMLKTTSVHWHGFFQO                             |
| D0VWU3 | PLVAGNIGDRFQLNVIDNLTNHTMLKTTSVHWHGFFQOQTN                             |
| D0VWU3 | IKVTKGKRYRFRLVSLSCDPNFTFSIDGHNLTIIEVDSSNS                             |
| D0VWU3 | RFRLVSLSCDPNFTFSIDGHNLTIIEVDSSNSQPLSVDSIQ                             |
| D0VWU3 | GGINSAILRYDGAPAVEPTTNQTTSVKPLNEVNLHPLVSTP                             |
| D0VWU3 | VPGSPSSGGVDKAINMAFNFGSNFFINGASFVPPSPVPVLL                             |
| D0VWU3 | SGAQT AQDLLPSGSVYVLPASNASIEISFPATAAAPGAPHPF                           |
| D0VWU3 | PFHLHGHTFAVVR SAGSTVYNYSNPIFRDVVSTGTPAAGDN                            |
| D0VWU3 | NYSNPIFRDVVSTGTPAAGDNV TIRFLTNNGPWFLHCHID                             |
| Q12739 | YNFDTPARRDVVNTGTGANDNVTIRFVTDNPGPWFLHCHID                             |
| Q12718 | PLITGKKGDRFQLNVDDTLTNHSMKSTSIHWHGFFQAGTN                              |
| Q12718 | RGPFVYD PKDPHASRYDV DNESTVITLTDWYHTAARLGPR                            |
| Q12718 | INVQH GKRYRFRLVSI SCDPNYTFSIDGHNLTVIEVDGINS                           |
| Q12718 | RFRLVSI SCDPNYTFSIDGHNLTVIEVDGINSQPLLVD SIQ                           |
| Q12718 | LLVDSIQIFAAQRYSFVLNANQTVGNVWRANPNFGTVGFA                              |

|        |                                             |
|--------|---------------------------------------------|
| Q12718 | VPGSPTPGGVDKALNLA FNFGTNFFINNATFTPPTVPVLL   |
| Q12718 | GVDKALNLA FNFGTNFFINNATFTPPTVPVLLQILSGAQT   |
| Q12718 | NYNDPIFRDVVSTGTPAAGDNVTIRFQTDNPGPWFHLCHID   |
| Q6GTx8 | CRGPVGVQTFRLERESRSTYNDTEVVSQASPSSEARFRID    |
| P00709 | ELICTMFHTSGYDTQAIVENNESTEYGLFQISNKLWCKSSQ   |
| P00709 | GLFQISNKLWCKSSQVPSRNICDISCDKFLDDDDITDDIMC   |
| P30805 | EWLCVIFHESGYDSQALNYNGSSSHGLFQINQPYWCDDXD    |
| P00716 | EWICTLFHTSGLDTKITVNNNGSTEYGI FQISDKLWCVSKQ  |
| P00714 | EWTCLVFHTSGYDSQAI VKNNGSTEYGLFQISNRNWKSSSE  |
| Q18823 | DRHEGFSHPAKYLTDFNVGNNETWWQSDTMQEGQYPTTTN    |
| Q18823 | NETWWQSDTMQEGQYPTTTNLTVLGKSF DITYVRLKFIS    |
| Q18823 | YNDRPWRSGTSVEANE CIACNCSQLSNRCYFDQQLFEETGH  |
| Q18823 | PCFCFGHSSICNTADGYFAMNVSSVFDQDKQKWAGQNRIGL   |
| Q18823 | DPYFGWYPRINELDFIGILSNI TAIKIRGTYSYKDIGYLSN  |
| Q18823 | FRRETKFGGPFNHCIKCDCHNHSNCEAESGSCICEHNTAG    |
| Q18823 | CDCLPNVIGIQCDQCAHG FYNITSGLGCQECNCDPLGSEGN  |
| Q18823 | EKVKSLDNTLQEI IENPAPVNDTKFDEKVKETSRAASEVWE  |
| Q18823 | IENVLHYLETEGEEERAQIAYNASQKYGEQSKRMSELASGTR  |
| Q18823 | AEKHLKQASEIEQLSEQA IANATQANKEASDAIYGGEQISK  |
| Q18823 | YGGEQISKQIAELKEKQNLNESI HRTLDLAEEQKKSADAE   |
| Q18823 | NLVDSSVKENSANDEL FDEVNRSVADARNELQSSQDQQRVS  |
| Q18823 | SLPIDKQFVIDYRKSADVLLNETHALADRYKDI IHSVDVDR  |
| Q18823 | QMATEAVRKATLAKNSAIEANATI LAEEDEIKKI INSLDTM |
| P25391 | RQRGLFPAILNLASNAHI STNATCGEKGP EMFCKLVEHVPG |
| P25391 | SPRKIPSQQDALGGRHQVSINNTAVMQRLAPKYWAAP EAY   |
| P25391 | FQDFHSKRQIDRDQLMTVL ANVTHLLIRANYSARKMALYRL  |
| P25391 | ECHGHAECNVHGVCIACAHNTGVHCEQCLPGFYGEP SRG    |
| P25391 | VKGSHSAVCHLETGLCDCKPNVTGQQCDQCLHGYGLDSGH    |
| P25391 | CDQCLHGYGLDSGHGCRPCNCSVAGSVSDGCTDEGQCHCV    |
| P25391 | CEECEDGHWG YDAEVGCQACNCSLVGSTHHRCDVVTGHCQC  |
| P25391 | AGSDRGPRPLVAPCVPCSCNNHSDTCDPNTGKCLNCGDNTA   |
| P25391 | ECVGVLLNDLDEIGDAVLSLNL TGIIPVPYGILSNLENTTK  |
| P25391 | LSLNL TGIIPVPYGILSNLENTTKYLQESLLKENMQKDLGK  |
| P25391 | ATAIERLQMSITEIMEKTTLNQTLDEDFLLPNSTLQNMQQN   |
| P25391 | TEIMEKTTLNQTLDEDFLLPNSTLQNMQQNGTSLLEIMQIR   |
| P25391 | NQTLDEDFLLPNSTLQNMQQNGTSLLEIMQIRDFTQLHQNA   |
| P25391 | QNGTSLLEIMQIRDFTQLHQ NATLELKAEDLLSQIQENYQ   |
| P25391 | MVNANLREFS DKKLHVQEEQNLTSELIVQGRGLIDAAAQT   |
| P25391 | HAAEFQRLADVLYSGLENIRNVSLNATS AAYVHYNIQSLIE  |
| P25391 | FQRLADVLYSGLENIRNVSLNATS AAYVHYNIQSLIEESEE  |
| P25391 | LVSNGKAAVQRSSRFLKEGNLSRKLPGIALELSELRNKTN    |

|        |                                            |
|--------|--------------------------------------------|
| P25391 | EGNNLSRKLPGIALELSELRNKTNRQENAVEITRQTNESL   |
| P25391 | ELRNKTNRQENAVEITRQTNESLLILRAIPKGIKDKGAKT   |
| P25391 | ASQSAVSTLRDVAGLSQELLNTSASLSRVNTTLRETHQLLQ  |
| P25391 | RDVAGLSQELLNTSASLSRVNTTLRETHQLLQDSMTATLLA  |
| P25391 | VEIQANLLFDRLKPLKMLEENLSRNLSSEIKLLISQARKQAA |
| P25391 | ANLLFDRLKPLKMLEENLSRNLSSEIKLLISQARKQAASIKV |
| P25391 | NQKSPKTKSKSPGTANVLDVNNSTLMFVGGLGGQIKKSPAV  |
| P25391 | QKSPKTKSKSPGTANVLDVNNSTLMFVGGLGGQIKKSPAVK  |
| P25391 | KVMTDLGSGPITLLTDRRYNNGTWYKIAFQRNRKQGVLAVI  |
| P25391 | YKIAFQRNRKQGVLAVIDAYNTSNKETHQGETPGASSDLNR  |
| P25391 | ELPPKSLSPSEEWLVTFATTNSSGIILAALGGDVEKRGDRE  |
| P25391 | LDENNPVEMKLGTLVESRTINVSPLYVGGIPEGEGTSLTMT  |
| P25391 | YVPGAHQFGLTQNSHFILPFNQSAVRKKLSVELSIRTFASS  |
| P25391 | VEGLFYLGGLPSQYQARKIGNITHSIPACIGDVTVNSKQLD  |
| P25391 | FDGSGYAALVKEGYKVQSDVNITLFEFTSSQNGVLLGISTA  |
| P25391 | AYEPKTATVLCDGKWHITLQANKSKHRITLIVDGNVGAESP  |
| P19137 | QQRGLFPAILNLATNAHISANATCGEKGPPEMFKLVEHVPG  |
| P19137 | LVEHVPGRPVRHAQCRVCDGNSNTPRERHPISHAIDGTNNW  |
| P19137 | AKERRSLNTAGQYSGGGVCVNCQNTTGINCETCIDQYYRP   |
| P19137 | RSLNTAGQYSGGGVCVNCQNTTGINCETCIDQYYRPHKVS   |
| P19137 | FCFGVSGVCDSLTWSISQVTNMSGWLVDLDMSTNKIRSQQD  |
| P19137 | STNKIRSQQDVLGGHRQISINNTAVMQRLTSTYYWAAPEAY  |
| P19137 | FRDFNTRREIDRDQLMTVLANVTHLLIRANYNSAKMALYRL  |
| P19137 | ECHGHASECDIHGICSVCTHNTTGDHCEQCCLPGFYGTPSRG |
| P19137 | RCADGYYGNPTVPGGTCVPCNCSGNVDPLEAGHCDSVTGEC  |
| P19137 | DGFYGDVAVTAKNCRACDCHENGSLSGVCHLETGLCDCKPHV |
| P19137 | CDQCLSGYYGLDTGLGCVFCNCSVEGSVSDNCTEEGQCHCG  |
| P19137 | LDTGLGCVPCNCSVEGSVSDNCTEEGQCHCGPGVSGKQCDR  |
| P19137 | CEECEAYWGLDPEQGCQACNC SAVGSTSAQC DVLSGHCP  |
| P19137 | IDYILIKASYGQGLQQSRIANISMEVGRKAVELPAEGEAAAL |
| P19137 | ESGGRGPRPLLAPCVPCNCSNHSVCDPETGKCLSCRDHST   |
| P19137 | DCVGPLINDLDSVGDVLSLNLTVSPAPYGILENLENTTK    |
| P19137 | LSLNLTVSPAPYGILENLENTTKYFQRYLIKENAKKIRAE   |
| P19137 | ELTRVLARHQKVNAEMERTSNGTQALATFIEQLHANIKEIT  |
| P19137 | TFIEQLHANIKEITEKVATLNQTARKDFQPPVSALQSMHQN  |
| P19137 | NQTARKDFQPPVSALQSMHQNISSLLGLIKERNFTEMQONA  |
| P19137 | SALQSMHQNISSLLGLIKERNFTEMQONATLELKAADLLS   |
| P19137 | QNISLLGLIKERNFTEMQONATLELKAADLLSRIQKRFQ    |
| P19137 | RFQKPOEKLKALKEANSLSLNHSEKLQAAEBLLKEAGSKTQ  |
| P19137 | VKANLKEEFQEKLRVQEEQNVTESELIAGREWVDAAGTHT   |
| P19137 | HASELQSRAGALDRDLENVRNVS LNATSAAHVHSNIQTLTE |

|        |                                            |
|--------|--------------------------------------------|
| P19137 | LQSRAGALDRDLENVRNVSLSNATSAAHVHSNIQTLTEEAEM |
| P19137 | NIQTLTEEAEMLAADAHKTANKTDLISESLASRGKAVLQRS  |
| P19137 | ESVGTRRKQQGITMKLDELKNLTSQFQESVDNITKQANDSL  |
| P19137 | ITMKLDELKNLTSQFQESVDNITKQANDSLAMLRES PGGMR |
| P19137 | ELKNLTSQFQESVDNITKQANDSLAMLRES PGGMREKGRKA |
| P19137 | ESPGGMREKGRKARELAAAANESAVKTLEDVLALSLRVFNT  |
| P19137 | ANESAVKTLEDVLALSLRVFNTSEDLSRVNATVQETNDLLH  |
| P19137 | EDVLALSLRVFNTSEDLSRVNATVQETNDLLHNSMTTLLA   |
| P19137 | LRVFNTSEDLSRVNATVQETNDLLHNSMTTLLAGRKMMDM   |
| P19137 | TSEDLSRVNATVQETNDLLHNSMTTLLAGRKMMDMEMQAN   |
| P19137 | MEMQANLLDRLKPLKTLLENLSRNLSEIKLLISRARKQAA   |
| P19137 | ANLLDRLKPLKTLLENLSRNLSEIKLLISRARKQAASIKV   |
| P19137 | AENPPVRTSKSPGPKSVLDINNSTMVGGGGQIKKSPAV     |
| P19137 | ENPPVRTSKSPGPKSVLDINNSTMVGGGGQIKKSPAVK     |
| P19137 | QIVILFSTFSPNGLLFYLASNGTKDFLSIELVRGRVKMVD   |
| P19137 | KVMVDLGSGLTLMTDRRYNNGTWYKIAFQRNRKQGLLAVF   |
| P19137 | EMPPKSLSPESLLATFATKNSGILLVALGKDAEEAGGAQ    |
| P19137 | YVAGAHQFGLSQNSHLVPLNQSDVRKRLQVQLSIRTFASS   |
| P19137 | KRKAFMTVDGQESPSVTVVGNAATLDVERKLYLGGLP SHYR |
| P19137 | FEGSGYAALVKEGYKVRDLNITLFRRTSKNGVLLGISSA    |
| P24043 | QQRGLFPAVLNLASNALITTNATCGEKGEPEMYCKLVEHVPG |
| P24043 | LVEHVPGQFVRNPQCRICNQNSNPNQRHPITNAIDGKNTW   |
| P24043 | VGGMCICYGHARACPLDPATNKSRCCEHNTCGDSCDQCCP   |
| P24043 | ACNCHGKAEECYDENVARRNLSLNIRGKYIGGGVCINCTQ   |
| P24043 | ARRNLSLNIRGKYIGGGVCINCTQNTAGINCETCTDGF FRP |
| P24043 | GVSCDRCARGYTGYPDCRACNCSGLGSKNEDPCFGPCICKE  |
| P24043 | CPPGYTGSSCESCWPRHRRVNGTI FGGICEPCQCFGHAESC |
| P24043 | CSKCAPNTWGHSTITGCKACNCSTVGS LDFQCNVNTGQCNC |
| P24043 | ECTGLLLGDLARLEQMMSINLTG PLPAPYKMLYGLENMTQ  |
| P24043 | MSINLTG PLPAPYKMLYGLENMTQELKHLLSPQRAPERLIQ |
| P24043 | EFIKELARDAEAVNEKAIKLNETLGT RDEAFERNLEGLQKE |
| P24043 | LREATDKIREANRLFVNQKNMTALEKKKEAVESGKRQIEN   |
| P24043 | IKDRKLAEKVSQAESHAAQLNDSSAVLDGILDEAKNISFNA  |
| P24043 | HAAQLNDSSAVLDGILDEAKNISFNATAAFKAYSNIKDYID  |
| P24043 | LNDS SAVLDGILDEAKNISFNATAAFKAYSNIKDYIDEAEK |
| P24043 | GLKTRIENADARNGDLLRTLNDTLGKLSAIPNDTAAKLQAV  |
| P24043 | RNGDLLRTLNDTLGKLSAIPNDTAAKLQAVKDKARQANDTA  |
| P24043 | AIPNDTAAKLQAVKDKARQANDTAKDVLAQITELHQNL DGL |
| P24043 | ADRLIDKLP I KELEDNLKKNISEIKELINQARKQANSIKV |
| P24043 | PDLTIDDSYWRIVASRTGRNGTISVRALDGP KASIVPSTH  |
| P24043 | TIQFDGEGYALVSRPIRWYPNISTVMFKFRTFSSALLMYL   |



|        |                                                                         |
|--------|-------------------------------------------------------------------------|
| P24043 | QNHNDGKWKSF T L S R I Q K Q A N I S I V D I D T N Q E E N I A T S S S G |
| P24043 | FGLDLKADDKIYFGGLPTLRNLSMKARPEVNLKKYSGCLKD                               |
| P24043 | FPKPGFVELSPVPI DVGTEINLSFSTKNESGI ILLGSGGTP                             |
| P24043 | ELSPVPIDVGTEINLSFSTKNESGI ILLGSGGTPAPRRKR                               |
| P24043 | VERTRGIFTVQVDENRRYMQNLV EQPIEVKKL FVGGAPPE                              |
| P24043 | HKIKIMRSKQEGILYVDGASNRTISPKKADILDVVGMLYVG                               |
| P24043 | PKKADILDVVGMLYVGGLPINYTTRRIGPVYYSIDGCVRNL                               |
| Q16363 | CNGNSNECLDGSYCVHCQRNTTGEHCEKCLDGYIGDSIRG                                |
| Q16363 | PNLIFEDCDEV T G QCRNCLRN T T G F K C E R C A P G Y Y D A R I A          |
| Q16363 | KSGVLSVSSGAAHRHVNEINATIYLLKTKL SERENQYALR                               |
| Q16363 | EEADEAYELLSQAESWQRLHNETR L F P V V L E Q L D D Y N A K L                |
| Q16363 | ARQRDHEKQQERVREQMEVNM S L S T S A D S L T T P R L T L S E L             |
| Q16363 | SADSLTTPRLT L S E L D D I K N A S G I Y A E I D G A K S E L Q V K L S   |
| Q16363 | ASGIYAEIDGAKSELQVKLSNLSNLSHDLVQEAI DHAQDLQ                              |
| Q16363 | IYAEIDGAKSELQVKLSNLSNLSHDLVQEAI DHAQDLQ QEA                             |
| Q16363 | QKALDASNVEINIVNYVSEANETAEFALNTDRIYDAVSGI                                |
| Q16363 | VYENIVNYVSEANETAEFALNTDRIYDAVSGIDTQIIYHK                                |
| Q16363 | AERQDAQQRLGQSRLITEEANRTTMEVQQATAPMANNLTNW                               |
| Q16363 | TEEANRTTMEVQQATAPMANNLTNWSQNLQHFDSSAYNTAV                               |
| Q16363 | ANRTTMEVQQATAPMANNLTNWSQNLQHFDSSAYNTAVNSA                               |
| Q16363 | QHFDSSAYNTAVNSARDAVRNLTEVVPQLLDQLRTVEQKRP                               |
| Q16363 | EVVPQLLDQLRTVEQKRPASNVASIQRIRELI AQTRSVAS                               |
| Q16363 | TRFDIEVRTPADNGLILLMVNGSMFFRLEMRNGYLHVFYDF                               |
| Q16363 | PNGLLFYYASGSDVFSISLDNGTVIMDVKGIKVQSVDKQYN                               |
| Q16363 | TQASEKKFYFGGSPISAQYANFTGCISNAYFTRVDRDVEVE                               |
| Q16363 | SLYECPIESSPLFLHKKGNLSKPKASQNKKGKSKDAPS                                  |
| O15230 | RPTEDLYCKLVGGPVAGGDPNQ TIRGQYCDICTAANSNKAH                              |
| O15230 | GTERWWQSPPLSRGLEYNVNTLDLGQV FHVAYVLIK FAN                               |
| O15230 | VPLENGEIVVSLVNGRPGAMNFSYSP L L R E F T K A T N V R L R F                |
| O15230 | ESDFTDGTCEDLTGRCYCRPNFSGERC DVCAEGFTGFPSCY                              |
| O15230 | DVCAEGFTGFPSCYPTPSSNDTREQVLPAGQIVNCDCSAA                                |
| O15230 | EAATPEGHAVRFGFNPLEFENFSWRGYAQMAPVQPRIVARL                               |
| O15230 | FSWRGYAQMAPVQPRIVARLNLTSPDLFWLVFRYVNRGAMS                               |
| O15230 | AMSVSGRVSVREEGRSATCANCTAQSQPVAFFPSTEPAFIT                               |
| O15230 | HPTFPVEVLINAGRVMQGHANASFCPHGYGCR TLVVCEGQA                              |
| O15230 | CLLCQPQTFGCHPLVGCEECNSGPGIQELTDPTCDTDSGQ                                |
| O15230 | IQELTDPTCDTDSGQCKCRPNVTGRRCDTCSPGFHGYPRCR                               |
| O15230 | DDLERAGALLPAIHEQLRGINASSMAWARLHRLNASIADLQ                               |
| O15230 | HEQLRGINASSMAWARLHRLNASIADLQSLRSP L G P R H E T                         |
| O15230 | RAVDRTLSELMSQTGHLGLANASAPSGEQLLRTLAEVERLL                               |
| O15230 | SRNQRLEEALQRKQELSRDNATLQATLHAARDTLASVFRL                                |

|        |                                             |
|--------|---------------------------------------------|
| 015230 | KLRLVEAAEBAHAQQQLGQLALNLSSIIIDVNDRLTQRAIEA  |
| 015230 | HTWATVVRQQGLVDRAQQLLANSTALEEAMLEQQRLGLVWA   |
| 015230 | EKTLPQLLAKLSILENRGVHNASLALSASIGRVRELIAQAR   |
| 015230 | VRGCVKGIKALGKYVDLKRNLNTGVSAGCTADLLVGRAMTF   |
| 015230 | EVKTQAGFADGAPHYVAFYSNATGVWLYVDDQLQOMKPHRG   |
| 015230 | QPEGPPRLLGGLPESGTIYNFSGCISNVFVQRLRGPQRFV    |
| 015230 | VQRLRGPQRVFDLQQLNLGSVNVSTGCAPALQAQTPGLGPRG  |
| 015230 | HRLAVMKSQNVLRLEVDAQSNHTVGPLLAAGAPAPLYLG     |
| Q61001 | RPTEDLYCKLVGGPVAGGDPNQTIQGYCDICTAANSNAKHA   |
| Q61001 | GTERWWQSPPLSRGLEYNVNVTLDLGQVFHVAYVLKIFAN    |
| Q61001 | VPLENGEIVVSLVNGRPGALNFSYSPLLRDFTKATNIRLRF   |
| Q61001 | SCNCHGHAYDCYDPEVDRNASQNDNVYQGGVCLDCQH       |
| Q61001 | ESDFTDGTCEDLTGRCYCRPNFTGELCAACAEGYTDFPHCY   |
| Q61001 | ACAEGYTDFPHCYPLPSFPHNDTREQVLPAGQIVNCDNAA    |
| Q61001 | EAATPEGHAVRFGFNPLEFENFSWRGYAHMMAIQPRIVARL   |
| Q61001 | FSWRGYAHMMAIQPRIVARLNVTSDFLRLVFRYVNRGSTS    |
| Q61001 | STSVNGQISVREEGKLSCTNCTEQSQPVAFPSTEPAFVT     |
| Q61001 | HPSFPVEVLINGGRIWQHANSFCPHGYGCRTLVLCGQT      |
| Q61001 | CLVCQPQSFQCHPLVGCEECNCSGPGVQELTDPTCDMDSGQ   |
| Q61001 | TGPHCERCAPGFYGNALLPGNCTRCDCSPCGTETCDPQSGR   |
| Q61001 | DDLERAGALLPAIREQLQGINASSAAWARLHRLNASIADLQ   |
| Q61001 | REQLQGINASSAAWARLHRLNASIADLQSKLRSPGPRYQA    |
| Q61001 | AEAQRLMARVQEQLTSFWEENQSLATHIRDQLAQYESGLMD   |
| Q61001 | QLAQYESGLMDLREALNQAVNTTREAEEINSRNQERLKEAL   |
| Q61001 | SRNQERLKEALQWKQELSQDNATLKATLQAASLILGHVSEL   |
| Q61001 | KVDLVEAAEBAHAQKLNQLAINLSGIIILGINQDRFIQRAVEA |
| Q61001 | RTWEMVVQRGLAAGARQLLANSASALEETILGHQGRGLAQG   |
| Q61001 | EKTLPQLLAKLSRLENRGVHNASLALSANIGRVRLKIAQAR   |
| Q61001 | VRGCIKGIKALGKYVDLKRNLNTGISFGCTADLLVGRMTTF   |
| Q61001 | EVETQRVAFADGAPHYVAFYSNVTGVWLYVDDQLQLVKSHER  |
| Q61001 | QPEEPSRLLGGLPVSGTFHNFSGCISNVFVQRLRGPQRFV    |
| Q61001 | VQRLRGPQRVFDLHQNMGSVNVSVGCTPAQLIETSRATAQK   |
| Q61001 | HRVAVIMGRDTRLREVDTSNHTTGRLPESLAGSPALLHLG    |
| Q61001 | PELPAYRGCLRKLLINGAPVNVTA SVQIQGAVGMRGCPST   |
| Q00174 | GTEAWWQSPPLSRGMKFNEVNLTINFEQE FHVAYLFIRMG   |
| Q00174 | ENGEIPVMLLNERPSSTNYFNSTVLQEWTRATNVRI RLLRT  |
| Q00174 | VGINCNKCKPKYYRPKGKHNETDVCSPCQCDYFFSTGHCE    |
| Q00174 | DSCAYGYYGYPNCRECECNLNGTNGYHCEAESGQCPCKIN    |
| Q00174 | GFPECKACECNKIGSITNDCNVTTGECKCLTNFGGDNCERC   |
| Q00174 | GPRCDQCLPGFYNYPDCKPCNCSSTGSSAITCDNTGKCNCL   |
| Q00174 | CKERVTRICNECKPLYWNLNISNTEGCEICDCWTDGTISA    |

|        |                                              |
|--------|----------------------------------------------|
| Q00174 | NVFKSSLYRIVLRYVNPNAENVTTATISVTSNDPLEVVDQHVK  |
| Q00174 | FDQTKEFIQNCGHDHFHITHNASDFCKKSVSFSLTADYNSGA   |
| Q00174 | EECACNPMGIANGNSQCDFLNGTCECRQNIAGRACDVCSNG    |
| Q00174 | TTCFCFGKTSRCDAYSALRVYVNSLLKHVSIITPEFHESISK   |
| Q00174 | FHEESIKFDMWVPVADEILLNETTLKADFTLREVNDERPAY    |
| Q00174 | KCQHGTGEGDHCERCVSGYGNATNGTPGDCCMICACPLPFDS   |
| Q00174 | INPEDQGS CDTRTGECLRCLNNTFGAACNLCA PGFYGDAIK  |
| Q00174 | DHYGFESGVGCRACDCGAASNSTQCDPHTGHCACKSGVTGR    |
| Q00174 | PSKKANSELES DAKSYAKQVNQTLANAFDIRERSSTTLGNI   |
| Q00174 | VNQTLANAFDIRERSSTTLGNI TVAYDEAVKSADQAKEAIA   |
| Q00174 | AASKIDAALQQAQHILGQINGTSIELTPNEQVLEKARKLY     |
| Q00174 | EKARKLYEEVNTLVLPKAKQNSLNALKNDIGEFSDHLEDL     |
| Q00174 | SLNALKNDIGEFSDHLEDLFNWSEASQAKSADVERRNVANQ    |
| Q00174 | IVEAVEAAQKLSQDAISAAGNATDKTDGIEERAH LADTGST   |
| Q00174 | LLQRARQSLQKVQDDLEPRLNASAGKVQKISAVNNATEHQL    |
| Q00174 | DLEPRLNASAGKVQKISAVNNATEHQLKDINKLIDQLPAES    |
| Q00174 | KLIDQLPAESQRDMWKNANASDALEILKNVLEILEPVS       |
| Q00174 | PSTILELKTPEKTKLLATRNLSTYFRTEPSGFLLYLGND      |
| Q00174 | LSTYFRTEPSGFLLYLGNDNKTAQKNNDFAVEIVNGYPI      |
| Q00174 | LEKKKPV TGLRFGNGYVQLNATS NLKSRSSIQFSKADKD    |
| Q00174 | FYGRDKHYMSIEMIDGAIFFNISLGE GGGVQSGSQDRYNDN   |
| Q00174 | ADLELPKLRRLYFGGHPRLNNTSISLQPNF DGCIDNVVINQ   |
| Q00174 | AKFSTVVS YAPHEYGLRMNNVSSDNNLHVVLHFKTTPNG     |
| Q00174 | AVELPIYLGGVNKFLESEVKNLTD FKTEVPYFNGCLKNIKF   |
| Q00174 | YFTVKTDLKNIVSTNYKLPNNE SFCDGKTRNVQA IKS KFVI |
| P11046 | YKTKPGTNIPTWWQSENGKENATIQLDLEAEFH FTHLITF    |
| P11046 | YRYFAYDCKESFPGVPTVLENI TDVMCTSRYSNV EPSRNGE  |
| P11046 | SNVEPSRNGEVI FRVLPPINVTDPYAEHVQNLKMTNLRI     |
| P11046 | LQSDNPEGCEPCTCNPLGTLNNSGCV MRTGECKCKKYVTGK   |
| P11046 | LPEVHEAEVVDECISYGANGNCSLVAETPDG SFTGIGFTRV   |
| P11046 | FFGDALQQNCQQCECDFLGTNNTIAHCDRFTGQC PCLPNVQ   |
| P11046 | YTSEFSELDKQLQHIRNLLQNTSVSLVDIEKLDYETQSLRD    |
| P11046 | NLDDIYNSLSLSGVELES LQNHSRLVQQLSKELKENG IQLQ  |
| P11046 | SKELKENG IQLQESNIEGALNLTRHAYERVSNLSTLKD EAN  |
| P11046 | QESNIEGALNLTRHAYERVSNLSTLKD EANELASNTDRNCK   |
| P11046 | ITSKKDQADQTIRALTQAKLNASEAYEKAKRGFEQSERYLN    |
| P11046 | NASEAYEKAKRGFEQSERYLNQTNANIKLAENLF IALNNFQ   |
| P11046 | TNANIKLAENLF IALNNFQENKTASPSSEKELAQRTLDL DL  |
| P11046 | ATIYRTKPD LDRVNNLQS IANATKEKADKILDSANSV VESL |
| P11046 | LAGQDLEK IDEETYSAEAPANNTAQQVEKLAKKVQKLQNNI   |
| P11046 | LEAMRARGEANNLQSATSATNQTLD RASRSENARERAKQL    |

|        |                                            |
|--------|--------------------------------------------|
| P07942 | VTTFAPNRLKIWWQSENGVENVTIQLDLEAEFHFTHLIMTF  |
| P07942 | NCNEHSISCHFDMAVYLATGNVSGGVCDDCQHNTMGRNCEQ  |
| P07942 | GLSNDLDGCRPCDCDLGGALNNSCFAESGQCSCRPHMIGRQ  |
| P07942 | LSPGSRVVLPRPVCFEKGTNYTVRLELPQYTSSDSDVESP   |
| P07942 | LQQDCRKCVCNYLGTVQEHCNGSDCQCDKATGQCLCLPNVI  |
| P07942 | DCTPCHQCFALWDVIAELTNRTHRFLEKAKALKISGVIGP   |
| P07942 | DVTEMAQVEVKLSDTTSQSNSTAKELDLSLQTEAESLDNTV  |
| P07942 | GALDSITKYFQMSLEAEERVNASTTEPNSTVEQSALMRDRV  |
| P07942 | KYFQMSLEAEERVNASTTEPNSTVEQSALMRDRVEDVMMER  |
| P07942 | EAKLRADEAKQSAEDILLKTNATKEKMDKSNEELRNLIKQI  |
| P07942 | EAVANEVLKMEMPSTPQQQLQNLTEDIRERVESLSQVEVILQ |
| P02469 | VTTFAPNRLKIWWQSENGVENVTIQLDLEAEFHFTHLIMTF  |
| P02469 | NCNEHSSSCHFDMAVFLATGNVSGGVCDCNCQHNTMGRNCEQ |
| P02469 | GLSNDLDGCRPCDCDLGGALNNSCSEDSGQCSCLPHMIGRQ  |
| P02469 | LSPGSRVVLPRPVCFEKGMNYTVRLELPQYTAGSDVESP    |
| P02469 | LRQDCRKCVCNYLGTVKEHCNGSDCHCDKATGQCSCLPNVI  |
| P02469 | DCTPCHQCFALWDVAIGELTNRTHKFLEKAKALKISGVIGP  |
| P02469 | DVTEKMAQVEVKLTDASQSNSTAGELGALQAEAESLDKTV   |
| P02469 | GALDSITKYFQMSLEAEKRVNASTDPNSTVEQSALTRDRV   |
| P02469 | KYFQMSLEAEKRVNASTDPNSTVEQSALTRDRVEDLMLER   |
| P02469 | EAKVRADEAKQNAQDVLLKTNATKEKVDKSNEDLRNLIKQI  |
| P02469 | EAVANEVLKMEMPSTPQQQLQNLTEDIRERVETLSQVEVILQ |
| P02469 | TQNLTSIESEETAASEETLTNASQRISKLERNVEELKRKAA  |
| P55268 | IPDPYSSRIQNLKITNLRVNLRHLTLGDNLLDPRREIRE    |
| P55268 | ECHGHTHSCHFDMAVYLAGSNVSGGVCDCGQHNTAGRHCCEL |
| P55268 | CPCLPNVQGPSCDRCAPNFWNLTSGHGCPQACHPSTRARGP  |
| P55268 | SSFWHMQEKLGIQVGIQVGNNTSAASTAQLVEATEELRREI  |
| P55268 | DENFNANHALSGLERDLALNLTLRQLDQHLDLLKHSNFLG   |
| P55268 | GAYDSIRHAHSQSAEAERRANTSALAVPSPVSNASARHRT   |
| P55268 | ETRRQASEAQQAALDKANASRGQVEQANQELQELIQSV     |
| P11047 | CTDEGGRPQRCMPEFVNAAFNVTVVATNTCGTPPEEYCVQT  |
| P11047 | DTTWWQSQTMLAGVQYPSINLTLHLGKAFDITYVRLKFHT   |
| P11047 | PRYFIAPAKFLGKQVLSYGQNLFSFRVDRRDRLSAEDLV    |
| P11047 | ATDYFWRPALTPFEFQKLLNNTS IKIRGTYSERSAGYLDD  |
| P11047 | ECREGFVGNRCDQCEENYFYNRSWPGCQECPCACYRLVKDKV |
| P11047 | REAQDVKDQNLMDRLQRVNTLSSQISRLQNIQNTIEET     |
| P11047 | TERLIEIASRELEKAKVAAANVSVTQPESTGDPNNMTLLAE  |
| P11047 | AKVAAANVSVTQPESTGDPNNMTLLAEERKLAERHKQEAD   |
| P11047 | KLAERHKQEADDIVRVAKTANDTSTEAYNLLLRTLAGENQT  |
| P11047 | TANDTSTEAYNLLLRTLAGENQTAFEIEELNRKYEQAKNIS  |
| P11047 | GENQTAFEIEELNRKYEQAKNISQDLEKQAARVHEEAKRAG  |

|        |                                             |
|--------|---------------------------------------------|
| P11047 | LQEANDILNNLKDFDRRVNDNKTAEEALRKIPAINQTITE    |
| P11047 | RRVNDNKTAEEALRKIPAINQTI TEANEKTREAQQALGSA   |
| P11047 | ATEAKNKAHEAERIA SAVQKNATSKAEERTFAEVTDLDN    |
| P02468 | CADEGGRPQRCMPEFVNAAFNVTVATNTCGTPPEEYCVQT    |
| P02468 | DTTWWQSQTMLAGVQYPNSINLTLHLGKAFDIYVRLKFHT    |
| P02468 | PRYFIAPVKFLGNQVLSYGQNLFSFRVDRDRTRLSAEDLV    |
| P02468 | ATDYPWRPALSPFEFQKLLNLS IKIRGTYSERTAGYRDD    |
| P02468 | ECREGFVGNRCDQCEENYFYNRSWPGCQCEPCACYRLVKDKA  |
| P02468 | REAQEVKDVQNLMDRLQRVNSLSHSQISRLQNI RNTI EET  |
| P02468 | TEQLIEIASRELEKAKMAAANVSI TQPESTGEPNNMTLLAE  |
| P02468 | AKMAAANVSI TQPESTGEPNNMTLLAE EARRLAERHKQEAD |
| P02468 | RLAERHKQEADDIVRVAKTANETS AEAYNLLLR TLAGENQT |
| P02468 | TANETS AEAYNLLLR TLAGENQTALEIEELNRKYEQAKNIS |
| P02468 | GENQTALEIEELNRKYEQAKNISQDLEKQAARVHEEAKRAG   |
| P02468 | LQEANDILNNLKDFDRRVNDNKTAEEALRRIPAINRTIAE    |
| P02468 | RRVNDNKTAEEALRRIPAINRTIAE ANEKTREQLALGNA    |
| P02468 | ATEAKNKAHEAERIA SAVQKNATSKADAERTFGEVTDLDN   |
| P11279 | LLLLGLMHCASAAMFMVKNNGTACIMANFSAAFSVNYDTK    |
| P11279 | CASAAMFMVKNNGTACIMANFSAAFSVNYDTKSGPKNMTF    |
| P11279 | IMANFSAAFSVNYDTKSGPKNMTFDLPSDATVVLNRSSCGK   |
| P11279 | TKSGPKNMTFDLPSDATVVLNRSSCGKENTSDPSLVIAFGR   |
| P11279 | TFDLPSDATVVLNRSSCGKENTSDPSLVIAFGRGHTLT LNF  |
| P11279 | ENTSDPSLVIAFGRGHTLT LNFTRNATRYSVQLMSFVYNLS  |
| P11279 | DPSLVIAFGRGHTLT LNFTRNATRYSVQLMSFVYNLS DTHL |
| P11279 | TLNFTRNATRYSVQLMSFVYNLS DTHLFPNASSKEIKTVES  |
| P11279 | RYSVQLMSFVYNLS DTHLFPNASSKEIKTVESITDIRADID  |
| P11279 | IRADIDKKYRCVSGTQVHMNVTVTLHDATI QAYLSNSSFS   |
| P11279 | VHMNVTVTLHDATI QAYLSNSSFSRGETRCEQDRPSPTTA   |
| P11279 | PAPSPSPSPVPKSPSVDKYNVSGTNGTCLLASMGLQLNLT    |
| P11279 | PSPSVPKSPSVDKYNVSGTNGTCLLASMGLQLNLTYERKD    |
| P11279 | KYNVSGTNGTCLLASMGLQLNLTYERKDNTTVTRLLNINPN   |
| P11279 | GTCLLASMGLQLNLTYERKDNTTVTRLLNINPNKTSASGSC   |
| P11279 | NLTYERKDNTTVTRLLNINPNKTSASGSCGAHLVTLELHSE   |
| P11279 | LVTLELHSEGTTVLLFQFGMNASSRFFLQGIQLNTILPDA    |
| P11279 | QGIQLNTILPDARDPAFKAANGSLRALQATVGNYSKCAEE    |
| P11438 | LLLLLAGLAHGASALFEVKNGTTCIMASFSASFLLTYETA    |
| P11438 | GTTTCIMASFSASFLLTYETANGSQIVNISLPASAEVLKNGS  |
| P11438 | ASFASFLLTYETANGSQIVNISLPASAEVLKNGSSCGKEN    |
| P11438 | TANGSQIVNISLPASAEVLKNGSSCGKENVSDPSLITIFGR   |
| P11438 | NISLPASAEVLKNGSSCGKENVSDPSLITIFGRGYLLTLNF   |
| P11438 | ENVSDPSLITIFGRGYLLTLNFTKNTRYSVQHMYFTYNLS    |

|        |                                             |
|--------|---------------------------------------------|
| P11438 | DPSLTIITFGRGYLLTLNFTKNTRYSVQHMYFTYNLSDEH    |
| P11438 | TLNFTKNTRYSVQHMYFTYNLSDEHFPNAISKEIYTMDS     |
| P11438 | IKADINKAYRCVSDIRVYMKNVTVVLRDATIQAYLSSGNFS   |
| P11438 | MKNVTVVLRDATIQAYLSSGNFSKEETHCTQDGPSPTTGPP   |
| P11438 | TGPPSPSPPLVPTNPTVSKYNVTGNGTCLLASMALQLNIT    |
| P11438 | PSPPLVPTNPTVSKYNVTGNGTCLLASMALQLNITYLKDD    |
| P11438 | KYNVTGNGTCLLASMALQLNITYLKDKNTVTRAFNISPN     |
| P11438 | GTCLLASMALQLNITYLKDKNTVTRAFNISPNDTSSGSCG    |
| P11438 | NITYLKDKNTVTRAFNISPNDTSSGSCGINLVTLKVENKN    |
| P11438 | NLVTLKVENKNRALELQFGMNASSLFFLQGVRLNMTLPDA    |
| P11438 | ELQFGMNASSLFFLQGVRLNMTLPDALVPTFSISNHSKKA    |
| P11438 | QGVRLNMTLPDALVPTFSISNHSKALQATVGNYSKCNTEE    |
| P13473 | SGLVLVCLVLGAVRSYALELNLTDSENATCLYAKWQMNFTV   |
| P13473 | CLVLGAVRSYALELNLTDSENATCLYAKWQMNFTVRYETTN   |
| P13473 | LELNLTDSENATCLYAKWQMNFTVRYETTNKTYKTVTISDH   |
| P13473 | NATCLYAKWQMNFTVRYETTNKTYKTVTISDHGVTYNGSI    |
| P13473 | ETTNKTYKTVTISDHGVTYNGSICGDDQNGPKIAVQFGPG    |
| P13473 | DDQNGPKIAVQFGPGFSWIANFTKAASTYSIDSVSFSYNTG   |
| P13473 | TKAASTYSIDSVSFSYNTGDNTTFPDAEDKGI LTVDELLAI  |
| P13473 | LEKNDVVQHYWDVLVQAFVQNGTVSTNEFLCDKDKTSTVAP   |
| P13473 | TTTTPTPEKPEAGTYSVNNGNDTCLLATMGLQLNITQDKVA   |
| P13473 | TYSVNNGNDTCLLATMGLQLNITQDKVASVININPNTTHST   |
| P13473 | MGLQLNITQDKVASVININPNTTHSTGSCRSHALLRLNSS    |
| P13473 | NPNTTHSTGSCRSHALLRLNSSSTIKYLDVFVAVKNENRFY   |
| P13473 | KYLDVFVAVKNENRFYLKEVNI SMYLVNGSVFSIANNLSY   |
| P13473 | AVKNENRFYLKEVNI SMYLVNGSVFSIANNLSYWDAPLGS   |
| P13473 | KEVNI SMYLVNGSVFSIANNLSYWDAPLGS SYMCNKEQTV  |
| P13473 | TVSVSGAFQINTFDLRVQPFNVTQ GKYSTAQDCSADDDNFL  |
| Q9UQV4 | KNTATTSPITYTLVTTQATPNNSHTAPPVTEVTVGPSLAPY   |
| Q9UQV4 | ITPPAHTTGTSSSTVSHTTGNTTQPSNQTTLPATLSIALHK   |
| Q9UQV4 | TTGTSSSTVSHTTGNTTQPSNQTTLPATLSIALHKSTTGQK   |
| Q9UQV4 | TTGQKPVQPTHAPGTAAAHNTRTAAPASTVPGPTLAPQP     |
| Q9UQV4 | PGPTLAPQPSSVKTGIYQVLNGSRLC IKAEMGIQLIVQDKE  |
| Q9UQV4 | LIVQDKESVFSPPRYFNIDPNATQASGNCGTRKSNLLNFQ    |
| Q9UQV4 | SGNCGTRKSNLLNFQGGFVNLFTKDEESYI SEVGAYLT     |
| Q9BMN8 | IKSLATGLSTLRFERVS LDDNATVSCSADNGVANPVVAEA   |
| Q9BMN8 | PPYFSYKLERQYVVGVGGNINLTCVAVGYPMRPFWKKTDL    |
| Q9BMN8 | PSTAPIGKNVLT LTHVESTENFTCVAVSALGNIEATTTVIA  |
| Q9BMN8 | QLTWDKPLYSSPVVGYTVRYNTSDGEKELT LITSPHEKHVVT |
| Q9BMN8 | WMGVVYDVLLAENREGRSQ NATEIATPVGSPDGEPI DVQ   |
| Q9BMN8 | VMKGKIVVSWRPPSEEKRN GNITSYKAILSAMDATADRYEQ  |

|        |                                             |
|--------|---------------------------------------------|
| Q9BMN8 | NPDPAALVGPPTNVRVEATSNSSTAVVQWDFESQKADSFVVK  |
| Q9BMN8 | VVSDLNAHKPYAFCLVAVKNNLTLNEQFNKVRVTNYMTNFQ   |
| Q9BMN8 | SNSVQLTWEYNGPRNVGFYVNHTGRKDYVNHELQEKTMSTP   |
| Q9BMN8 | TPATEEYGPISHYWIILVPANYSTEDVVNLDPIDIELEKATAE |
| Q8BSM7 | ASLLIMLKKEGFYSSLCPAENRNTTQDEQHQWTSQDQOEK    |
| Q8BSM7 | LIMLKKEGFYSSLCPAENRNTTQDEQHQWTSQDQOEKMLN    |
| Q8BSM7 | IMDWRIKDCVDAPTEGLTENENASFGDARDGASTKFRPRYR   |
| P49291 | VSCSAQETMGCADRTAINDFNATLYMGKWEYAKMGSMFYE    |
| P49291 | SMPYEEGGVCVTAEYSMSNNITVVNSMKDNTTHEVNTTGTG   |
| P49291 | VTAEYSMSNNITVVNSMKDNTTHEVNTTGTGWAEFASELHT   |
| P49291 | MSSNNITVVNSMKDNTTHEVNTTGTGWAEFASELHTDGKLSV  |
| P49291 | VHFPNSPSVGNWILSTDYDNYSIWVSCVKRPDSAASTEIS    |
| P49291 | VKRPDSAASTEISWILLRSRNSNMTLERVEDELKLNQLDL    |
| P49291 | PDSAASTEISWILLRSRNSNMTLERVEDELKLNQLDLNKY    |
| P18428 | AISDYVFNTASLVYHEEGYLNFSITDDMIPPDNSIRLTKS    |
| P18428 | MNLELQGSVPSAPLLNFSFGNLSVDPYMEIDAFVLLPSSSK   |
| P18428 | AFVLLPSSSKEPVFRLSVATNVSATLTFNTSKITGFLKPGK   |
| P18428 | SKEPVFRLSVATNVSATLTFNTSKITGFLKPGKVKVELKES   |
| Q8K1G2 | KCSLVSGQSESQTMHVQLSVNNTPTSVNLSNLLVLDEIT     |
| Q8K1G2 | ESQTMHVQLSVNNTPTSVNLSNLLVLDEITGLAVKESPG     |
| Q8K1G2 | LSNLLVLDEITGLAVKESPGNNTQDGIQTFRKSFLQVGECY   |
| Q9UIQ6 | IMVIYLLPRCTFTKEGCHKKNQSIGLIQFFATNGKLPWAQ    |
| Q9UIQ6 | AQIRLPTAVVPLRYELSLHPNLTSMFRGSVTISVQALQVT    |
| Q9UIQ6 | TISVQALQVTWNIIHSTGHNISRVTFMSAVSSQEKQAEIL    |
| Q9UIQ6 | EYAYHGQIAIVAPEALLAGHNYTLKIEYSANISSSYGFYFG   |
| Q9UIQ6 | VAPEALLAGHNYTLKIEYSANISSSYGFYGFYSYDESNEK    |
| Q9UIQ6 | FSESVKMSTYLVAFIVGEMKNLSQDVNGTLVSIYAVPEKIG   |
| Q9UIQ6 | MSTYLVAFIVGEMKNLSQDVNGTLVSIYAVPEKIGQVHYAL   |
| Q9UIQ6 | GAMENWGLLTFREETLLYDSNTSSMADRKLVTKIIAHELAH   |
| Q9UIQ6 | LSSYEDFLDAREFKTMKKDSLNSHPISSSVQSSEQIEEMFD   |
| Q9UIQ6 | MLKTYLSEDFVQHAVVLYLHNHSYASIQSDDLWDSFNEVTN   |
| Q9UIQ6 | NHSYASIQSDDLWDSFNEVTNQTLDVKRMKTTWTLQKGFPL   |
| Q9UIQ6 | QPSDTSYLWHIPLSYVTEGRNYSKYQSVSLLDKKSGVINLT   |
| Q9UIQ6 | GRNYSKYQSVSLLDKKSGVINLTEEVLWVKVINMNGYYIV    |
| Q9UIQ6 | GLGKVPKRAFDLINYLGNENHTAPIEALFQTDLIYNLLE     |
| Q9UIQ6 | PSMRELSALLEFACTHNLGNCSTAMKLFDDWMASNGTQS     |
| Q9UIQ6 | HNLGNCSTAMKLFDDWMASNGTQSLPTDVMTTVFKVGAKT    |
| Q9UIQ6 | GSTYLFSTKTHLSEVQAFFENQSEATFRLRCVQEALEVIQL   |
| Q8C129 | IMVIYLLPRCTFTKEGCHKKNQSAELIQPVATNGKVPWAQ    |
| Q8C129 | AQIRLPTAIIPLCYELSLHPNLTSMFRGSVTISLQALQDT    |
| Q8C129 | TISLQALQDTRDIIHSTGHNISRVTFMSAVSSQEKQVEIL    |

|        |                                              |
|--------|----------------------------------------------|
| Q8C129 | EYPYHEQI AVVAPELLTGHNYTLKIEYSANISNSYYGFYG    |
| Q8C129 | VAPELLTGHNYTLKIEYSANISNSYYGFYGI TYTDKSNEK    |
| Q8C129 | FSESVKMSTYLVAFIVGEMRNLSQDVNGTLVSVYAVPEKIG    |
| Q8C129 | MSTYLVAFIVGEMRNLSQDVNGTLVSVYAVPEKIQVHHAL     |
| Q8C129 | AGAMENWGLLTFREETLLYDNATSSVADRKLVTKIIAHELA    |
| Q8C129 | LNSYEDFLDARFKTRKDSLNSHPISSSVQSSEQIEEMFD      |
| Q8C129 | MLKSYLSEDFRHAVILYLHNHSYAAIQSDDLWDSFNEVTD     |
| Q8C129 | QPSDTSHLWHIPISYVTDGRNYSEYRSVSLDKKSDVINLT     |
| Q8C129 | GRNYSEYRSVSLDKKSDVINLTEQVQVVKVNSNMTGYIV      |
| Q8C129 | DKKSDVINLTEQVQVVKVNSNMTGYIVHYAHHDDWTALINQ    |
| Q8C129 | LAGLGKVLPRMAFDLIDY LKNETHAPI TEALFQTNLIYNL   |
| Q8C129 | PSMRELRALLEFACAHSLENCTTMATNLFDSWMASNGTQS     |
| Q8C129 | HLENCTTMATNLFDSWMASNGTQSLPTDVMVTVFKVGART     |
| Q8C129 | GSTHLFSTKTHLSEVQAFFENQSEATLKLRCVQEALEVIQL    |
| P04180 | PFWLLNVLPFPHTTPKAELSNHTRPVILVPGCLGNQLEAKL    |
| P04180 | LNMFLPLGVDCWIDNTRVYVNRSSGLVSNAPGVQIRVPGFG    |
| P04180 | MFPSRMAWPEHDVFI STPSFN YTG RDFQRFFADLHFEEGWY |
| P04180 | PQPVHLLPLHGIQHLNMVFSNLTLEHINAILLGAYRQGPPA    |
| P16301 | PFWLLNVLPFPHTTPKAELSNHTRPVILVPGCLGNRLEAKL    |
| P16301 | FNLFLPLGVDCWIDNTRIVYNHSSGRVSNAPGVQIRVPGFG    |
| P16301 | MLPAPHVWPEHDVFI STPNFN YTV QDFERFFTDLHFEEGWH |
| P16301 | TELCGQWQGRQSQPVHLLPMNETDHLNMVFSNKTLEHINAI    |
| P16301 | SQPVHLLPMNETDHLNMVFSNKTLEHINAILLGAYRTPKSP    |
| P01130 | GRVNRICIPQFWRCDGQVDCDNGSDEQGCPPKTCSDQDEFRCH  |
| P01130 | DGSDEASC PVLTCGPASFQCNSSTCIPQLWACDNDPDCEGD   |
| P01130 | SRQCDREYDCKDMSDEVGCVNVTLCEGPNKFKCHSGECITL    |
| P01130 | LGTVSADTKGVKRKTLFRENGSKPRAIVVDPVHGFMYWTD     |
| P01130 | SDVNLLAENLLSPEDMVL FHNLTQPRGVNWCERTTLSNGGC   |
| P02873 | LALLSHANSATETSFI IDAFNKTNLILQGDATVSSNGNLQL   |
| P02873 | YSAPIQIRDSTTG NVASFDTNFTMNI RTHRQANS AVGLDFV |
| P02873 | SVPWDVHDYDGNAEVRITYNSSTKVFSVLSLNPSTGKSNN     |
| Q41114 | LVLLTHANSASDTSFNFY SFNETNLILQGDATVSSKGYLQL   |
| Q41114 | YSAPIQIRDSTTG NVASFDTNFTMNI TQREANSVIGLDFA   |
| Q41114 | IQIRDSTTG NVASFDTNFTMNI TQREANSVIGLDFALVPV   |
| P23558 | SQIPSGSSAGMFLFCSSDYNSNQI IAVEFDTYFGKAYNP     |
| P22972 | PDSPLRRAGGYGLFEDTKDNDSSYQTVAVEFD TIGSPVNF    |
| O24313 | RISSENSVLELTKVVNGVPTWNSTGRALYAKPVQVWDSTGN    |
| O24313 | PESVNVGFSAATGDPGSKQRNATEHDILSWSFSASLPGTN     |
| P29257 | DTQPQSAGGYLGLFEKDSYNSNQI IAVEFDTYNSAWDP      |
| P22971 | APPNSPLRRAGGYLGLFETS NKSDSSYQTVAVEFD TVGAPA  |
| P17346 | EERVTOQFAELTTKLSELQENVTNTFHGCNHC PNGWVTSEN   |



|        |                                            |
|--------|--------------------------------------------|
| P22973 | ANSQIPSGSSAGMFLFCSSNDSKSSNQIIAVEFDSYFGKT   |
| P19588 | LLLLTQAYSADIQSFSFKNFNSSSFIHQGDATVSSSKLRLT  |
| P19588 | KSTGAVASWATSFTANIFAPNKSSADGIAFALVPVGSEPK   |
| P18670 | TAIGDFQVVYDLNGSPYVQNHKSFITGFTPVKISLDFPSE   |
| P18670 | VKISLDFPSEYIMEVSGYTGNVSGYVVVRSLTFFKNKKTG   |
| U3KRG0 | PYYIIPSTSRAGFSPDNLKNTSQPSCPLDLITQLRFPRI    |
| U3KRG0 | LITQLRFPRIIGVPIFTPQNSSLKVVPLSHNLNIHTCSDL   |
| Q9AVB0 | GEGCQSQCQYNWRCGVDGFRNRTCNDLCCSVGGWCGTDD    |
| Q9AVB0 | GEGCQSQCQYNWHCGVDGFRNRTCNDLCCSEWGWCGITEG   |
| Q9YGP1 | SFGLLVVFLSLSGAKGSCCTNDSLPMNGMCYKIFDEPKTWE  |
| P02707 | LARIAALSCKLSTLQSEPKHNFSSRDSLFPCEGAQSRQWEY  |
| P81371 | FFLAPPDTPQKQDGGFLGLFNDNKSITVAVEFDTFSNTW    |
| P81371 | VYISYEASTKTLTASLTYPSNATSYIVSANVDLKSALPEWV  |
| P17404 | PTYPKIQRERRELVRKIVTTTTTRRLRSGPQGTAPGRPN    |
| P17404 | TTTTRLRSGPQGTAPGRPNNGTRPSVQEDAEFFNPDNPHY   |
| P16030 | STSSLTGTFTFPNFWNTQENGTEIIFLGNATYTPGALRLT   |
| P16030 | TFPNFWNTQENGTEIIFLGNATYTPGALRLTRIGEDGIPL   |
| P16030 | DTWPNTWSDLRYPHIGINVNSTVSVATRWDDNDAYVTKS    |
| P16030 | DLPKILPERVRIGFSGGTGFNETQYILSWSFTSTLNSTKIS  |
| P83410 | FFMGPTKSKPAQGYGYLGVFNNSKQDNSYQTLAVEFDTFSN  |
| P16404 | KVNSVETISFSFSEFEPGNDNLTLQGAALITQSGVLQLTKI  |
| P16404 | FFMGPTKSKPAQGYGYLGFNNSKQDNSYQTLGVEFDTFSN   |
| P02874 | TDTQPKSGGGYLGIFKDAESNETVVAVEFDTFSNRWDPANS  |
| P05046 | TPIHWDKETGVSASFAASFNFYAPDTKRLADGLAFFLA     |
| P16300 | AANLILQGNVSSKGHLLLTNVTHNGEPSVASSGRALYSAP   |
| P16300 | VASSGRALYSAPIQIRDSTGNASSTPTSHSYTLQQIFQNV   |
| P16300 | TGNASSTPTSHSYTLQQIFQNVTDPAWLFALVPVDSQPKK   |
| P16300 | FALVPVDSQPKKGRLLGLFNKSENDINALTVAVEFDTCHN   |
| P16300 | DSSTKFLAVSLFYPIITGKRNNVSANVELEKVLDDWVSVGFS |
| P02871 | ISTKSWNLQNGEEAHVAISFNATTNVLSVTLTYPNLTGYTL  |
| Q6P5S2 | LPSWCVLVGSFSASLAGTNSLSETEPPLWKESPGQLSDYR   |
| Q6P5S2 | MYIINPWVYLERMGMYKIILNQATARYFAKFAPDNEQNILWG |
| P48357 | CQKFCVLLHWEFIYVITAFNLSYPIPTPWRFKLSCMPNST   |
| P48357 | AFNLSYPIPTPWRFKLSCMPNSTYDYFLLPAGLSKNTSNSN  |
| P48357 | SCMPNSTYDYFLLPAGLSKNTSNSNGHYETAVEPKFNSSG   |
| P48357 | LSKNTSNSNGHYETAVEPKFNSSGTHFSNLSKTTFHCCFRS  |
| P48357 | NGHYETAVEPKFNSSGTHFSNLSKTTFHCCFRSEQDRNCSL  |
| P48357 | HFSNLSKTTFHCCFRSEQDRNCSLCADNIEGKTFVSTVNSL  |
| P48357 | EVLEDSPLVPQKGSFQMVHCNCSVHECCECLVPVPTAKLND  |
| P48357 | CNCSVHECCECLVPVPTAKLNDTLLMCLKITSGGVIFQSPL  |
| P48357 | SWSSPPLVPFPLQYQVKYSENSTTVIREADKIVSATSLLVD  |

|        |                                             |
|--------|---------------------------------------------|
| P48357 | VFTTQDVIYFPPKILTSVGSNVSFHCIYKKNKIVPSKEIV    |
| P48357 | PQSQYDVVSDHVSKVTFNLTNETKPRGKFTYDAVYCCNEHE   |
| P48357 | YECIFQPIFLLSGYTMWIRINHSLGSLDSPPTCVLPDSVVK   |
| P48357 | CAVYAVQVRCKRLDGLGYWSNWSNPAYTVVMDIKVPMRGPE   |
| P48357 | PMRGPEFWRIINGDTMKKEKNVTLWKPLMKNDLCSVQRY     |
| P48357 | MKNDLCSVQRYVINHHTSCNGTWEEDVGNHTKFTFLWTEQ    |
| P48357 | QRYVINHHTSCNGTWEEDVGNHTKFTFLWTEQAHTVTVLAI   |
| P48357 | QAHTVTVLAINSIGASVANFNLTFSWPMSKVNIVQSLAYP    |
| P48357 | TFSWPMSKVNIVQSLAYPLNSCVIVSWILSPDYKLMYF      |
| P24348 | GNLEITWIEANEIKKWRSTNSTVDPKNEDSPLKSINFEDN    |
| P24348 | YIHKNDKVEHVMRELVRIRNGSVTIQDNPKMCIYIGDKIDW   |
| P24348 | DCQRVYRSVCPKSCSQCFYSNSTSSYECCDSACLGGCTGHG   |
| P24348 | CEKCRSSSCPICKTVDGHLTNETLKNLEGCEQIDGHLIIEH   |
| P24348 | KTWKSVMGTCVEKCDTKGFLRNQTSMKCERCSPPECETCNGLG |
| P24348 | PDSNLGYGGCKQCKYAVKYENDTIFCLQSSGMNNVCVENDL   |
| P24348 | PSEICMDQCPVNSFMVPTNNTVCKKCHHECDQNYHCANG     |
| P24348 | ECDQNYHCANGQSTGCQCKNFTVFKGDIAQCVSECPKNLP    |
| P16150 | SGPQVSSVKLSTMMSPTTSTNASTVFFRNPDENSRGMLPVA   |
| P19256 | LHCFGFIISCFSQQIYGVVYGNVTFHVPSNVLKEVLWKKQK   |
| P19256 | FSSFKNRVYLDTVSGSLTIYNLTSSDEDEYEMESPNIIDTM   |
| P19256 | SLTIYNLTSSDEDEYEMESPNIIDTMKFFLYVLESPLPSETL  |
| P19256 | KFFLYVLESPLPSETLTALCALTNGSIEVQCMIPHYNSHRGLI |
| P19256 | NSHRGLIMYSWDCPMEQCKRNSTSIYFKMENDLPQKIQCTL   |
| P19256 | FKMENDLPQKIQCTLSNPLFNTTSSIIILTTCPSSGHSRHR   |
| P28175 | DAEKPFVWELMDRSNVVLDNLTFWASGEPGNETNCVYLDI    |
| P28175 | DRSNVVLNDNLTFWASGEPGNETNCVYLDIRDQLQPVWTKK   |
| P28175 | RYSCEVLHYLSGTEVTCTTNGTWSAPKPRCIKIVITCQNP    |
| P28175 | CESRYEELGSGRRCDNSGNWSGRPASCIPVCGRSDSPRS     |
| P28175 | SCIPVCGRSDSPRSPFIWNGNSTEIGQWPWQAGISRWLADH   |
| P28175 | TREHLKEGTLAVVTGWGLNENNTYSEMIQQAVLPVVAASTC   |
| Q08380 | CDNLWDLTDASVVCRALGFENATQALGRAAFQGGSGPIMLD   |
| Q08380 | SLGWLKSNCRHERDAGVCTNETRSTHTLDLSRELSEALGQ    |
| Q08380 | HTVILTANLEAQALWKEPGSNVTMSVDAECVPMVRDLRLRYF  |
| Q08380 | LVEKIRFPMMLEPELFEIQFNLSLYWSHEALFQKKTQALE    |
| Q08380 | LQALEFHTVFPQLLARYKGLNLTEPTYKPRIYTSPTWSAFV   |
| Q08380 | VADVDFEGWKAAPALDNTNSKSTSSFPAGHFNFRFT        |
| Q5RDA4 | CDNLWDLTDASVVCRALGFENATQALGRAAFQGGSGPIMLD   |
| Q5RDA4 | SLGWLKSNCRHERDAGVCTNETRSTHTLDLSRELSEALGQ    |
| Q5RDA4 | HTVILTANLEAQALWKEPGSNVTMSVDAECVPMVRDLRLRYF  |
| Q5RDA4 | LVEKIRFPMMLEPELFEIQFNLSLYWSHEALFQKKTQALE    |
| Q5RDA4 | LQALEFHTVFPQLLARYKGLNLTEPTYKPRIYTSPTWSAFV   |

|        |                                             |
|--------|---------------------------------------------|
| Q5RDA4 | VADVTFEFGWKAAPSAALDTNSKSTSSFFPCPAGHFNGFRT   |
| A7E3W2 | CENMWDLTDA SVVCRALGFQNA TEALGGAAFGPGYGPIMLD |
| A7E3W2 | SLGWMRSNCRHDKDASVICTNETRGVYTLDLSGELPAALEQ   |
| A7E3W2 | LVGQVRFPMMPPQDLFSLQFNLSLYWSHEALFQKKILQALE   |
| A7E3W2 | LQALEFHTVFPFELLAQYWGLNLTGTYQPRLYTSP TWSQSV  |
| Q99538 | YDDIAYSEDNPTPGIVINRPNGTDVYQGVPKDYTGEDVTPQ   |
| Q99538 | DHGSTGILVFPNEDLHVKDLNETIHYMYKHKMYRKMVFYIE   |
| Q99538 | VEDLTKETLHKQYHLVKSHNTSHVMQYGNKTI STMKVMQF   |
| Q99538 | HKQYHLVKSHNTSHVMQYGNKTI STMKVMQFQGMKRKASS   |
| Q9BXB1 | LTAVPEGLSAFTQALDISMNNITQLPEDAFKNFPFLEELQL   |
| Q9BXB1 | LQALTLALNKISSIPDFAFTNLSSLVVLHLHNNKIRSLSQH   |
| Q9BXB1 | LRTIHLYDNPLSFVGNFAFNLSLHSLVIRGASMVQQFPN     |
| Q9BXB1 | NLSLHSLVIRGASMVQQFPNLTGTVHLESILTGTGTSSSI    |
| Q9BXB1 | EDNSLQDHSVAQEKGTAADAANVTSTLENEEHSQIIHCTPS   |
| O75473 | DGRMLLRVDCSDLGSELPSNLSVFTSYLDLSMNNISQLLP    |
| O75473 | LSELPSNLSVFTSYLDLSMNNISQLLPNPLPSLRFLEELRL   |
| O75473 | LQAMTLALNKIHHIPDYAFGNLSSLVVLHLHNNRIHSLGKK   |
| O75473 | CAFGVCENAYKISNQWNKGDNSMDDLHKKDAGMFAQDER     |
| O75473 | LFTNCILNCPVAFLSFSSLINLTFISPEVIKFI LLVVVPLP  |
| P38571 | TLHSEGGGKLTAVDPE TNMNVSEIISYWGFPSEEYLVETE   |
| P38571 | LVETEDGYILCLNRI PHGRKNHSDKGPVVF LQHGLLADS   |
| P38571 | VVFLQHGLLADSSNWVTNLANS SLGFILADAGFDVWMGNSR  |
| P38571 | AFSYDEMAKYDLPASINFILNKTGQE QVYVYVGHSGT TIGF |
| P38571 | LKELCGNL CFLLCGFNERNLNMSRVDVYTHSPAGTSVQNM   |
| P38571 | KFQKFQAFDWGSSAKNYFHYNQSYPPTYNVK DMLVPTAVWS  |
| P42702 | SQKKGAPHDLKCVTNNLQVWNC SWKAPSGTGRGTDYEVCI E |
| P42702 | CSWKAPSGTGRGTDYEVCIENR SRSCYQLEKTSIKI PALSH |
| P42702 | TINSLHDFGSSTSKFTLNEQNVSLIPDTPEILNLSAD FSTS  |
| P42702 | SKFTLNEQNVSLIPDTPEILNLSAD FSTSTLYLKWDRGSV   |
| P42702 | IWEIKVLRKESMELVKLVTHNTTLNGKDTLHHWSWASDMPL   |
| P42702 | YIDNLHFSGLEEWS DWSVPKNI SWIPDSQTKVFPQDKVILV |
| P42702 | GHTNCP LIHLDGENVAIKIRNISVSASSGTNVVFTTEDNIF  |
| P42702 | TLVESFSGKYVRLKRAEAPT NESYQLLFQMLPNQEIYNFTL  |
| P42702 | APT NESYQLLFQMLPNQEIYNFTLNAHNPLGRSQSTILVNI  |
| P42702 | YNFTLNAHNPLGRSQSTI LVNITEKVYPHTPTSFVKVDINS  |
| P42702 | VNITEKVYPHTPTSFVKVDINS TAVKLSWHLPGNFAKINFL  |
| P42702 | KINFLCEIEIKKSNSVQEQRNVTIKGVENS SYLVALDKLNP  |
| P42702 | EIKKSNSVQEQRNVTIKGVENS SYLVALDKLNPYTYTFRI   |
| P42702 | LIIYWKPLPINEANGKILSYNVSCSSDEETQSLSEIPDPQH   |
| P42702 | KIEQVVMGKGILLTWHYDPNMTCDYVIKWCNSSRSEPCLM    |
| P42702 | ILLTWHYDPNMTCDYVIKWCNSSRSEPCLM DWRKVP SNSTE |

|        |                                             |
|--------|---------------------------------------------|
| P42702 | KWCNSSRSEPCCLMDWRKVPSNSTETVIESDEFRPGIRYNFF  |
| P42702 | YQLLRSMIGYIEELAPIVAPNFTVEDTSADSIILVKWEDIPV  |
| P42702 | ERDTSKMRVLESGRSDIKVKNI TDISQKTLRIADLQGKTSY  |
| P42703 | FTSSLLLKWNDRGSALPHPSNATWEIKVLQNPRTPEVALVL   |
| P42703 | PVALVLLNTMLSGKDTVQHWNWTS DLPLQCATHSVSIRWHI  |
| P42703 | HIDSPHFSGYKEWSDWSPLKNI SWIRNTETNVFPQDKVULA  |
| P42703 | WIRNTE TNVFPQDKVVLGASNMTICCMSPTKVLSGQIGNTL  |
| P42703 | TLFESISGKSAVFHRIEGLTNETYRLGVQMHPGQEIHNFTL   |
| P42703 | GLTNETYRLGVQMHPGQEIHNFTLTGRNPLGQAQSAVVINV   |
| P42703 | HNFTLTGRNPLGQAQSAVVINVTERVAPHDPTSLKVKDINS   |
| P42703 | INVTERVAPHDPTSLKVKDINSTVVTFSWYLPGNFTKINLL   |
| P42703 | SLKVKDINSTVVTFSWYLPGNFTKINLLCQIEICKANSKKE   |
| P42703 | KINLLCQIEICKANSKKEVRNATIRGAEDSTYHVAVDKLN    |
| P42703 | LIVYWKPLPINEANGKILSYNVSCSLNEETQSVLEIFDPQH   |
| P42703 | TVEQAVGLGNRIFLTWRHDPNMTCDYVIKWCNSSRSEPCLL   |
| P42703 | IFLTWRHDPNMTCDYVIKWCNSSRSEPCLLDWRKVPSNSTE   |
| P42703 | KWCNSSRSEPCLLDWRKVPSNSTETVIESDQFQPGVRYNFY   |
| P42703 | YQLLRSIIIGYVEELAPIVAPNFTVEDTSADSIILKWDDIPV  |
| P42703 | ERDTPKTRSLEPHSDIKLKNITDISQKTLRIADLQGKTSY    |
| P11542 | TDHLFARDSRTACEWQSFVNNQTKLQEDFQFI FTALSTLGH  |
| P15018 | LLLVLHWKHGAGSPLPITPVNATCAIRHPCHNNLMNQIRSQ   |
| P15018 | IRHPCHNNLMNQIRSQLAQLNGSANALF ILYYTAQGEFFPN  |
| P15018 | LYYTAQGEFFPNNDKLCGPNVTDFFPPHANGTEKAKLVEL    |
| P15018 | PNNLDKLCGPNVTDFFPPHANGTEKAKLVELYRIVVYLGTS   |
| P15018 | EKAKLVELYRIVVYLGTS LGNITRDQKILNPSALSLHSKLN  |
| P15018 | NITRDQKILNPSALSLHSKLNATADILRGLLSNVLCRLCSK   |
| P09056 | LLLVLHWKHGAGSPLPITPVNATCAIRHPCHGNLMNQIKNQ   |
| P09056 | IRHPCHGNLMNQIKNQLAQLNGSANALF ISYYTAQGEFFPN  |
| P09056 | SYYTAQGEFFPNNVEKLCAPNMTDFPSFHNGTEKTKLVEL    |
| P09056 | PNNVEKLCAPNMTDFPSFHNGTEKTKLVELYRMVAYLSAS    |
| P09056 | EKTKLVELYRMVAYLSASLTNI TRDQKVLNPTAVSLQVKLN  |
| P09056 | NITRDQKVLNPTAVSLQVKLNATIDVMRGLLSNVLCRLCNK   |
| Q96FE5 | LGLRSNRLKLIPLGVFTGLSNLTKLDISENKIVILLDYMFO   |
| Q96FE5 | ISHRAFSGLNSLEQLTLEKCNLTS IPTREALSHLHGLIVLRL |
| Q96FE5 | LEISHWPYLDTMTPNCLYGLNLTLSLITHCNLTAVPYLAVR   |
| Q96FE5 | TMTPNCLYGLNLTLSLITHCNLTAVPYLAVRHLVYLRFLNL   |
| Q96FE5 | CNLTAVPYLAVRHLVYLRFLNLSYNPISTIEGSMHELLRL    |
| Q96FE5 | GQLAVVEPYAFRGLNYLRVLNVSGNQLTTLEESVHFSVGNL   |
| Q96FE5 | GRLTVFPDGTLEVRVAQVDNGTYLCIAANAGGND SMPAHL   |
| Q96FE5 | RYAQVDNGTYLCIAANAGGND SMPAHLHVRYSYSPDWPHPQ  |
| Q96FE5 | DSMPAHLHVRYSYSPDWPHPQNKTFAFISNPGEGEANSTRA   |

|        |                                             |
|--------|---------------------------------------------|
| Q96FE5 | PHQPNKTFAFISNQPGEGEANSTRATVPPFPDIKTLIIATT   |
| P79066 | PDISYNRFAQYAGCDTSASANDTLECLRSKSSSVLHDAQNS   |
| P79066 | VPYISGNQEDEGTAFAFVALNATTPHVKKWLQYIFYDASE    |
| P20261 | PGFLAYSSLRLSYLPRPDGVNITDDMYALVREGKYANIPVI   |
| P20261 | IPVIGDQNDGTFFGTSSLNVTTDAQAREYFKQSFVHASD     |
| Q9XTR8 | LFLLCINSVFGFEGPEDAQYNETEARMLLSLSAAAYSLDVT   |
| Q9XTR8 | AAAYSLDVTPCIGRTFSPAENQTLSTFVSRCDFVGNPCAG    |
| Q9XTR8 | CDPVSTNGGYHHAIEIWYFGNMTQGDPPFVCTGLPRDEDFG   |
| P32946 | VPVIGDQNDGTLFGLSSLNVTTDAQARAYFKQSFHIASD     |
| P41365 | PLSTQLGYTPCWISPPFMLNDTQVNTTEYMVNAITALLYAGS  |
| Q9Y5X9 | EHEGCYLSVGHSQLLEDCSFNMTAKFFIIHGWTMSGIFEN    |
| Q9Y5X9 | ANVVVDWLPLAHQLYTDVANNTRVVGHSIARMLDWLQEKD    |
| Q9Y5X9 | YGTNADSQTLPEIVERTEQNATNTFLVYTEEDLGDLLKIQ    |
| Q9Y5X9 | IRVKSGETQRKLTFCCTEDPENTSI SPGRELWFRKCRDGRWM |
| P07098 | LGTTHGLFGKLRHSGSPEVTMNI SQMITYWGYPNEEYEVVTE |
| P07098 | VVFLQHGLLASATNWI SNLPNNSLAFILADAGYDVWLGNSR  |
| P07098 | LNLLCSNALFII CGFDSKNFNTRSRLDVYLSHNPAGTSVQNM |
| P07098 | DWGSFVQNRMHYDQSQPPYYNVTAMNVP IAVWNGKDLLAD   |
| P11151 | AEDTCHLIPGVTESVANCHFNHSSKTFVVIHGWTVTGMYES   |
| P11151 | LYGTVAESENIPFTLPEVSTNKTYSFLLYTEVDIGELMLK    |
| P11602 | DEDVCYLVPGQMDSLAQCNFNHTSKTFVVIHGWTVTGMYES   |
| P11602 | AQMPYKVFHYQVKIHFFGKTNVTKVDQPFLISLYGTLDESE   |
| P11602 | LYGTLDESENIPFTLPEVSSNKTF SFLIYTEVDIGDLLMLK  |
| P06858 | AEDTCHLIPGVAESVATCHFNHSSKTFMVIHGWTVTGMYES   |
| P06858 | LYGTVAESENIPFTLPEVSTNKTYSFLLYTEVDIGELMLK    |
| P16233 | VHVIGHSLGAHAAGEAGRRTNGTIGRITGLDPAEPCFQGTP   |
| P00591 | VHVIGHSLGSHAAGEAGRRTNGTIERITGLDPAEPCFQGTP   |
| P06857 | ANNVRVGAQVAQMLSMLSANYSPSQVQLIGHSLGAHVA      |
| P54317 | FKGKTSAVEQTFFLNTGESGNFTSWRYKVSVTLGKEKVN     |
| P54317 | VDFNVGKI QKVKFLWNKRGINLSEPKLGASQITVQSGEDGT  |
| P54318 | FEGKTATVEQTVYLNTGDSGNFTRWRYKVSVTLGAKKLSG    |
| Q8N6C8 | GAYSKPTLSALPSPVVTSGGNVTIQCDSQVAFDGFILCKEG   |
| Q8N6C8 | WGRDFLQRFGRQPQAGLSQANFTLGPVRSRSGGQYTCSGAY   |
| Q8N6C8 | FTLGPVRSRSGGQYTCSGAYNLSSEWSAPSDPLDILITGQI   |
| Q8N6C8 | QIRARPFLSVRPGPTVASGENVTLLCQSQGGMHTFLLTKEG   |
| O75023 | GFYAEPTLLALPSPVVASGGNVTLQCDTLDGLLTFVLVEEE   |
| O75023 | GEHDLVQSGSQPQAGLSQANFTLGPVRSRSGGQYRCYGAH    |
| O75023 | LIPDIPALSVQPGPKVASGENVTLLCQSWHQIDTFFLTKEG   |
| Q9H0V9 | YPNEEKQQERVFPPYISAMVNNGSLSYDHERDGRPTELGCT   |
| Q12907 | TYPNDETTTERVFPI SVMVNNGSLSYDHSKDRWTELAGCT   |
| P49256 | TYPNDETTTERVFPI SVMVNNGSLSYDHSKDRWTELAGCT   |

|        |                                             |
|--------|---------------------------------------------|
| Q7M1X5 | PGFVVTVGRVYCDPCRAGFETNVSHNVEGATVAVDCRPFDDGG |
| Q9Y4K0 | TEAHISSCKLGPQVSLDPMKNVTCENGLPAVVSCVPGQVFS   |
| Q9Y4K0 | LRLNGGRNPFYEGRVEVLVERNGSLVWGMVCGQNWGIVEAMV  |
| Q9Y4K0 | DCHRRYHSMEVFTHYDLLNLNGTKVAEGHKASFCLEDTECE   |
| Q99677 | RRFIDFQFQDSNSSLRPRLGNATANNTCIVDDSFKYNLNGA   |
| Q99677 | DFQFQDSNSSLRPRLGNATANNTCIVDDSFKYNLNGAVYSV   |
| Q99677 | WILVLSGGISASLSTTNVNNATTTCFEGFSKRVWKTYLSK    |
| A1Z7G7 | TTNRPSPPFWVLSNGPPIFGNGSLIHPGFGAGAPPPRL      |
| A1Z7G7 | HHGEDTASPTKPSKLPAGGNATSPSNTRILTVGGSGTDD     |
| A1Z7G7 | TKSSPNRPPGTAASGSVVPNGSVVVRTINNINLNAAGMSGG   |
| A1Z7G7 | GGDDESKLFCGPTHARNLYWNMTRVGDVNVQPCPGAAGIA    |
| A1Z7G7 | EYDDDISSTTPAPSGGDCLNSSCEPPVSMHKVNQRLRN      |
| A1Z7G7 | YDHFDLKSSRSYVRNTAILSNDSDVNAGEIQQLRILNSKV    |
| A1Z7G7 | GRHIQLSQPITLTLKHLKTENVNTNPTCVFWNVIDHAWANG   |
| A1Z7G7 | VFWNYIDHAWANGCSLESTNRTHSVCSCNHLTNFAILMDV    |
| Q9DAX2 | MIGRLRPSFLAVCDPDWSQVNC SGYVQLEVCGRGSPANVTEA |
| Q9DAX2 | WSQVNC SGYVQLEVCGRGSPANVTEARLSFYSGHSSFGMYCM |
| Q2I0M4 | SANQLEALAPGTFAPLRALRNLSLAGNRLARLEPAALGALP   |
| Q14392 | NVLMIEDGAFEGFLPRLTHLNLRSNLTCISDFSLQQLRVL    |
| Q14392 | RENKLLHFPLAALPRLIYLNLSNNLIRLPTGPPQDSKGIH    |
| Q14392 | KGIHAPSEGWSALPLSAPSGNASGRPLSLLNLDLSYNEIE    |
| Q14392 | NEIELIPDSFLEHLTSLCFLNLSRNCLRTFEARRLGSPLCL   |
| Q14392 | RLSHLPAWTQAVSLEVLDLRNNSFSLLPGSAMGGLETSLRR   |
| Q07954 | GVQDCMDGSDEGPHCRELQGNCSRLGCQHHCVPPTLDGPTCY  |
| Q07954 | SRLGCQHHCVPPTLDGPTCYCNSFQLQADGKTCKDFDECSV   |
| Q07954 | TNTDGSFICGCVGYLQPDNRSCAKNEPVDPRPVLIIAN      |
| Q07954 | VSTITPTSTRQTTAMDFSYANETVCWVHVGDSSAAQTQLKCA  |
| Q07954 | TQLKCARMPGLKGFVDEHTINISLSLHHVEQMAIDWLTGNF   |
| Q07954 | VFFTDYGGQIPKVERCDMDGQNRKLVDSKIVFPHGITLTLV   |
| Q07954 | TNSDNANAQQKTSVIRVNRFNSTEQVVTRVDKGGALHIYH    |
| Q07954 | PAGRLYWDAFYDRIETILLNGTDRKIVYEGPELNHAFGLC    |
| Q07954 | IPNRWLCGDNDCGNSEDESATCSARTCPPNQFSCASGRC     |
| Q07954 | EHWTCDGDNDCGDYSETHANCTNQATRPPGGCHTDEFQCR    |
| Q07954 | NSDEENCESLACRPPSHPCANNTSVCLPPDKLDCGNDCCGD   |
| Q07954 | SDEENCESLACRPPSHPCANNTSVCLPPDKLDCGNDCCGDG   |
| Q07954 | GSDEGELCDQCSLNNGGCSHNCVAPGEGIVCSCPLGMELG    |
| Q07954 | VAPGEGIVCSCPLGMELGPDNHTCQIQSYCAKHLKCSQKCD   |
| Q07954 | VYWTDWRTNTLAKANKWTGHNVTVVQRTNTQPFDLQVYHPS   |
| Q07954 | NPCEANGGQGPCSHLCLINYNRTVSCACPHLMKHLKDNNTTC  |
| Q07954 | INYNRTVSCACPHLMKHLKDNNTTCYEFKKFLLYARQMEIRG  |
| Q07954 | VDLDPYYNYIISFTVPDIDNVTVLDYDAREQRVYWSDVRT    |

|        |                                             |
|--------|---------------------------------------------|
| Q07954 | REQRVYWSDVRTQAIKRAFINGTGVETVVSADLPNAHGLAV   |
| Q07954 | QPHGLVVHPLRGKLYWTDGDNI SMANMDGSNRTLLFSGQKG  |
| Q07954 | RGKLYWTDGDNI SMANMDGSNRTLLFSGQKGFVGLAIDFPE  |
| Q07954 | GFVGLAIDFPESKLYWISSGNHTINRCNLDGSGLEVIDAMR   |
| Q07954 | VSEKMGTCISKADGSGSVLRNSTTLVMHMKVYDESIQLDHK   |
| Q07954 | DALVPVSGTSLAVGIDFHAENDTI YWVDMGLSTI SRAKRDQ |
| Q07954 | IAGNIYWTDQGFVDIEVARLNGSFRYVVISQGLDKPRAITV   |
| Q07954 | GQYPRIERSRLDGTERRVVLVNSISWPNGISVDYQDGKLYW   |
| Q07954 | DMFSVSVFEDFIYWSDRTHANGSIKRGSKDNATDSVPLRTG   |
| Q07954 | FIYWSDRTHANGSIKRGSKDNATDSVPLRTGIGVQLKDIKV   |
| Q07954 | NMKLLRVDIPQQPMGI IAVANDTNSCELSPCRINNGGCQDL  |
| Q07954 | CRINNGGCQDLCLLTHQGHVNCSCRGRILQDDLTCRAVNS    |
| Q07954 | VNCSCRGGRIQLDDLTCRAVNSSCRAQDEFECANGECINFS   |
| Q07954 | AVNSSCRAQDEFECANGECINFSLTCDGVPHCKDKSDEKPS   |
| Q07954 | NMLWCNGADDCGDSDEI PCNKTACGVGEFRCDGTICIGNS   |
| Q07954 | CNKTACGVGEFRCDGTICIGNSSRCNQFVDCEDASDEMNC    |
| Q07954 | IGNSSRCNQFVDCEDASDEMNC SATDCSSYFRLGVKGVLFQ  |
| Q07954 | DGDKDCADGADESI AAGCLYNSTCDDREFMCQNRQCI PKHF |
| Q07954 | HDQSDAEPKNPHCTSQEHKCNASSQFLCSSGRVAEALLCN    |
| Q07954 | EPFLIFANRYLRKLNLDGSNYTLKQGLNNAVALDFDYRE     |
| Q07954 | QMIYWTDVTTQGS MIRRMHLNGSNVQVLHRTGLSNPDGLAV  |
| Q07954 | VYWTDWETKINRAHKTTGTNKLLISTLHRPMDLHVFFHAL    |
| Q07954 | HKCACPTNFYLGSDGRTCVSNCTASQFVCKNDKCI PFWK    |
| Q07954 | PRVWVCDRDNDCVDGSDPANCTQMTCGVDEFRCCKDSGRCI   |
| Q07954 | SDEEACGTGVRTCPLDEFQCNNTLCKPLAWKCDGEDDCGDN   |
| Q07954 | GDGSDDEDCSIDPKLTSCATNASICGDEARCVRTEKAAAYCA  |
| Q07954 | QPGCQDINECLRFGTCSQLCNNTKGGHLCSCARNFMKTHNT   |
| Q07954 | APPTTSNRHRRQIDRGVTHLNI SGLKMPRGIAIDWAGNVY   |
| Q07954 | HNERLYWADAKLSVIGSIRLNGTDPIVAADSKRGLSHPPFSI  |
| Q07954 | VTYINNRVFKIHKFGHSPLVNL TGGLSHASDVVLYHQHKQP  |
| Q07954 | LCLLSPSGFVCTCPNGKRLDNGTCVPVPSPTPPDAPRPGT    |
| Q07954 | CPTGFTGPKCTQQVCAGYCANNSTCTVNQGNQPQCRCPLGPF  |
| Q07954 | PTGFTGPKCTQQVCAGYCANNSTCTVNQGNQPQCRCPLGFL   |
| Q07954 | CSRCLEGACVVNKQSGDVTNCNCTDGRVAPSLCTCVGHCSNG  |
| Q91ZX7 | GIQDCMDGSDEGAHCRELRANCSRMGCQHHCVP TSPGPTCY  |
| Q91ZX7 | SRMGCQHHCVP TSPGPTCYCNSFQLQADGKTCKDFDECSV   |
| Q91ZX7 | TNTDGSFTCGCVEGYLLQFDNRSCAKNEPVD RPPVLLIAN   |
| Q91ZX7 | VSTITPTSTRQTTAMDFS YANETVCWVHVGD SAAQTQLKCA |
| Q91ZX7 | TQLKCARMPGLKGFVDEHTINI SLSLHHVEQMAIDWLTGNF  |
| Q91ZX7 | VFFTDYGGIPKVERCDMDGQNRKLVDSKIVFPHGITL DLV   |
| Q91ZX7 | TNSDNANTQQKTSVIRVNRFNSTEYQVVTRVDKGGALHIYH   |

|        |                                             |
|--------|---------------------------------------------|
| Q91ZX7 | PAGRLYWVDAFYDRIETILLNGTDRKIVYEGPELNHAFGLC   |
| Q91ZX7 | IPNRWLCDGDNDGNSSESNATCSARTCPPNQFSCASGRC     |
| Q91ZX7 | EHWTCDGDNDCGDYSDETHANCTNQATRPPGGCHSDEFQCR   |
| Q91ZX7 | NSDEENCEALACRPPSHPCANNTSVCLPPDKLCDGKDDCGD   |
| Q91ZX7 | SDEENCEALACRPPSHPCANNTSVCLPPDKLCDGKDDCGDG   |
| Q91ZX7 | GSDEGELCDQCSLNNGGCSHNCSVAPGEGIVCSCPLGMELG   |
| Q91ZX7 | VAPGEGIVCSCPLGMELGSDNHTCQIQSYCAKHLKCSQKCD   |
| Q91ZX7 | VYWTDWRTNTLAKANKWTGHNVTVVQRTNTQPFDLQVYHPS   |
| Q91ZX7 | NPCEANGGRGPCSHLCLINYNRTVSCACPHLMKHLKDNHTTC  |
| Q91ZX7 | INYNRTVSCACPHLMKHLKDNHTTCYEFKKFLLYARQMEIRG  |
| Q91ZX7 | VDLDAPIYNYIIISFTVPDIDNVTVLVDYDAREQRVYWSDVRT |
| Q91ZX7 | REQRVYWSDVRTQAIKRAFINGTGVETVVSADLPNAHGLAV   |
| Q91ZX7 | QPHGLVVHPLRGKLYWTDGDNISMANMDGSNHTLLFSGQKG   |
| Q91ZX7 | RGKLYWTDGDNISMANMDGSNHTLLFSGQKGPVGLAIDFPE   |
| Q91ZX7 | GPVGLAIDFPESKLYWISSGNHTINRCNLGSELEVIDTMR    |
| Q91ZX7 | VSEKMGTCNKADGSGSVLRNSTTLMVHMKVYDESIQLEHE    |
| Q91ZX7 | DALVPVSGTSLAVGIDFHAENDTIYWVDMGLSTISRAKRDQ   |
| Q91ZX7 | IAGNIYWTDQGFVDIEVARLNGSFRYVVISQGLDKPRAITV   |
| Q91ZX7 | GHPRIERSRLDGTERVVLVNVSISWPNGISVDYQGGKLYW    |
| Q91ZX7 | DMFSVSVFEDFIYWSDRTHANGSIKRGCKDNATDSVPLRTG   |
| Q91ZX7 | FIYWSDRTHANGSIKRGCKDNATDSVPLRTGIGVQLKDIKV   |
| Q91ZX7 | DMKLLRVDIPQQPMGIIAVANDTNSCELSPCRINNGGCQDL   |
| Q91ZX7 | CRINNGGCQDLCLLTHQGHVNCSCRGGRILQEDFTCRAVNS   |
| Q91ZX7 | VNCSCRGGRILQEDFTCRAVNSCRAQDEFECANGECISFS    |
| Q91ZX7 | NMLWCNGVDDCGDGSDEI PCNKTAGVGEFRCDGSCIGNS    |
| Q91ZX7 | CNKTAGVGEFRCDGSCIGNSRCNQFVDCEDASDEMNC       |
| Q91ZX7 | IGNSSRCNQFVDCEDASDEMNCATDCSSYFRLGVKGVLFQ    |
| Q91ZX7 | DGDKDCTDGADESVTAGCLYNSTCDDREFMCQNRLCIPKHF   |
| Q91ZX7 | HDHSEAPKNPHCTSPEHKCNASSQFLCSSGRVAAEALLCN    |
| Q91ZX7 | EPFLIFANRYLRKLNLDGSNYTLKQGLNNAVALDFDYRE     |
| Q91ZX7 | QMIYWTDVTTQGSMIRRMHLNGSNVQVLHRTGLSNPDGLAV   |
| Q91ZX7 | VYWTDWETKSNRAHKTGANKTLLISTLHRPMDLHVFFHAL    |
| Q91ZX7 | HKCACPTNFYLGGDGRTCVSNCTASQFVCKNDKCI PFWWKC  |
| Q91ZX7 | PRVWVCDRDNDVCVDSDEPANCTQMTCGVDEFRCCKDSGRCI  |
| Q91ZX7 | SDEEACGTGVRTCPLDEFQCNNTLCKPLAWKCDGEDDCGDN   |
| Q91ZX7 | GDGSEEDCSIDPKLTSCATNASMCGDEARCVRTEKAAAYCA   |
| Q91ZX7 | QPGCQDINECLRFGTCSQLCNNTKGGHLCSCARNFMKTHNT   |
| Q91ZX7 | APPTTSNRHRRQIDRGVTHLNI SGLKMPRGIAIDWVAGNVY  |
| Q91ZX7 | HNERLYWADAKLSVIGSIRLNGTDPIVAADSKRGLSHPFISI  |
| Q91ZX7 | VTYINNRVFKIHKFGHSPLINLTGGLSHASDVVLYHQHKQP   |
| Q91ZX7 | LCLLSPSGPVCTCPNGKRLDNGTCVPVPSPTPPDAPRPGT    |



|        |                                            |
|--------|--------------------------------------------|
| Q91ZX7 | CPTGFTGPKCTAQVCAGYCSNNSTCTVNGQNPQCRCPLPGF  |
| Q91ZX7 | PTGFTGPKCTAQVCAGYCSNNSTCTVNGQNPQCRCPLPGFL  |
| Q91ZX7 | CSRCLQGACVVNKQTDGVTNCNTDGRVAPSLCTCIDHCSNG  |
| A2ARV4 | ERNCYYP TCDQLTCANGACYNTSQKCDHKVDCRDSSEAN   |
| A2ARV4 | YNTSQKCDHKVDCRDSSEANCTTLCSSQKEFCGSGECILR   |
| A2ARV4 | ISMCKVCDGVPDCPEGEDENNATSGRYCGTGLCSILNCEYQ  |
| A2ARV4 | CHQTPYGGECFCPPGHIINSNDSRTCIDFDDCQIWGICDQK  |
| A2ARV4 | RHQCLCEEGYILERGQHCKSNDSFSAASII FSNGRDLLVGD |
| A2ARV4 | ERGOHCKSNDSFSAASII FSNGRDLLVGDHGRNFRILAES  |
| A2ARV4 | PMQAKVFSTDINGLNTQEILNVSIDAPENLAVDWINNKL    |
| A2ARV4 | YHQS SLTPFGVTVYHALRQPNATNFCGNNNGGCAQICVLSH |
| A2ARV4 | FRPAKIMRAWSDGSHLMPIVNTSLGWPNGLAIDWSTSR     |
| A2ARV4 | RCDGVDDCHDNSDEHQCGALNNTCSSAFTCVHGGQCI      |
| A2ARV4 | YVCDGDKDCVDGSDEAGCVLNCTSSQFKCADGSSCINSR    |
| A2ARV4 | TQPFHCPSQWQCPGYSICVNLSALCDGVFDCPNGTDES     |
| A2ARV4 | PGYSICVNLSALCDGVFDCPNGTDESPLCNQDSC         |
| A2ARV4 | RCIQGPFGATCVCPIGYQLANDTKCEDVNECDIPGFC      |
| A2ARV4 | VTASENLLLVASRDKIIMDNITAHTHNIYSLVQDV        |
| A2ARV4 | VTGRVFWSDLLEGKTWSAFQNGTDKRVVHDSGLSL        |
| A2ARV4 | LETIEVSKIDGSHRTVLI SKNVTKPRGLALDPRMG       |
| A2ARV4 | VFWTDRGTHQVMQANKWHGRNQSVVMYSVPQPLG         |
| A2ARV4 | LCLLSAQEP RHYSCACPSGWNLSDDSVNVRGDQP        |
| A2ARV4 | QFIYWVENPGEIHRVKT DGSNRTAFAPLSLLGSS        |
| A2ARV4 | YWCDFSSSVRSSNGIRRIKPNNGSFTNIVTYGIGANG      |
| A2ARV4 | DFSSSVRSSNGIRRIKPNNGSFTNIVTYGIGANGIR       |
| A2ARV4 | GNLYFTNAFVYETLIEVIRINTTYRRVLLKVS           |
| A2ARV4 | LFWADYGQKPKIERSFLDCTNRTVLVSEGI             |
| A2ARV4 | LEDDGKNCATSREDFLIYSLNNSLRS                 |
| A2ARV4 | VTDGIAFDWINRRIYSDFSNQ TINSMAEDGS           |
| A2ARV4 | GTNAKIERATLGGNFRVPIVNTSLVWPNG              |
| A2ARV4 | DFYNDCGDNSEAGCLFRSCNSTTEFTCSNGRCI          |
| A2ARV4 | SNGRCIPLSYVCNGINNCHDNDTSDEKNCP             |
| A2ARV4 | GDNDCGDMSDEDQRHHCELQNCSSTEFTCINSR          |
| A2ARV4 | PQHWVCDGDADCADALDELQNC TMRACSTGEF          |
| A2ARV4 | DEKGCINECQDSSISHCDHNCTDITISFYCS            |
| A2ARV4 | CRQNSNIEPYLVFSNRYIRNLIDGTSYS               |
| A2ARV4 | VEERLYWIDAEKQI IERMFLNKTNETIISHR           |
| A2ARV4 | FVSDLEGRQRKMLAQHCVDANNTFCFENPR             |
| A2ARV4 | VYWADWDHAYIARIGMDGTNKTVIISTKIEW            |
| A2ARV4 | NTRTVEKGNKYDGSGRVVLVNTTHKPF                |
| A2ARV4 | ESDLCPHRFCRLGQFQCRDGNCTS                   |

|        |                                             |
|--------|---------------------------------------------|
| A2ARV4 | CGDYSDEPIHECMTAAYNCDNHTEFSCKTNYRCIPQWAVCN   |
| A2ARV4 | DGRADCLDASDESACPTRFPNGTYCPAAMFECKNHVCIQSF   |
| A2ARV4 | CDNVDDCGDLSDETGCNLGENRTCAEKICEQNCTQLSNGGF   |
| A2ARV4 | DETCNLGENRTCAEKICEQNCTQLSNGGFICSCRPGFKPS    |
| A2ARV4 | AADGSPPLLLLPEVNRIRKYNISSEKFSEYLEEEHIIQAID   |
| A2ARV4 | KLLVVNPWLTQVRIFHQLRYNQSVSNPKQVC SHLCLLRPG   |
| 075581 | LLLYANRRDLRLVDATNGKENATIIVVGGLEDAAA VDFVFSH |
| 075581 | SHGLIYWSDVSEEAIKRTEFNKTESVQNVVVSGLLSPDGLA   |
| 075581 | IHSDIFSPMDIHAFSQQRQPNATNPCGIDNGGCSHLCLMSP   |
| 075581 | VARNLYWTDGTDRIEVTRLNGTMRKILISEDLEEPRAIVL    |
| 075581 | GEIPKIERAALDGS DRVVLVNTSLGWPNGLALDYDEGKIYW  |
| 075581 | TDNRIYWTDISLKTISRAFMNGSALEHVVEFGLDYPEGMAV   |
| 075581 | TQYQDYIYWTDWSRRSIERANKTSGQNRTIIQGHLDYVMDI   |
| 075581 | IYWTDWSRRSIERANKTSGQNRTIIQGHLDYVMDILVFHSS   |
| 075581 | AVPVGGFVCGCPAHYSLNADNRCSAPTFFLLFSQKSAINR    |
| 075581 | LSIDIYSRYIYWTCEATNVIINVTLDGRSVGVVLKGEQDRP   |
| Q04833 | QCPTYWHSVSCIAEYQRCDNITDCADGSDEKDCPASTVDC    |
| Q04833 | KCDGKYDCRDLSDKDCSRNHTACFQYQFRCADKTQCIQK     |
| Q04833 | TCSCLGDCFTLQMEHGPGKDNLTMRGYCVSNNADKMKLFVA   |
| Q04833 | MRPAAIYRCHIDGQNCQVIRNTTLGRPSEMAIDFAENRLCW   |
| Q04833 | PNELEAKCACRQGFMINKENHSCQKDPAEKIEQLCSSNST    |
| Q04833 | ENNHSCQKDPAEKIEQLCSSNSTQFQCKNGRCIPKEWKCDG   |
| Q04833 | KCDS DND CGDGSDEKLEMCGNATCAANQFSCANGRCIPIYW |
| Q04833 | KCHNSPNGPICSPFGEQLVNKTKCEPENECLDSSSCSQR     |
| Q04833 | LTDRIYWSDIREKKILSANRNGTNATVFIADGLDITEGIAL   |
| Q04833 | RIYWSDIREKKILSANRNGTNATVFIADGLDITEGIALDWV   |
| Q04833 | NTIEVANLEDPKQRTLLVHQNVSQPRGIAVDPRKGVMFWD    |
| Q04833 | DMYYSDRRLQKLQVYPKYPNGTTSEYPSHTFSKALGVVAV    |
| Q04833 | KTLAQITTDSATYRSTVNGGNKTKMFSSAVPDDAYCLGFDW   |
| Q04833 | QNMWTDNRLEKLFRAATSKPNQTSLLLSPTTVAASLKDIGD   |
| Q04833 | FDVDVNLRRVYFVVEPVGVNISWFSMNAENPRLVFGASK     |
| Q04833 | LCTVVADDIGLAASKVQCSCNDTYELVQEPGKDYPTQCVLR   |
| Q04833 | CPSAVACAEGTFPCSNGHCINQTKVCDGHNDCHDEQVSDS    |
| Q04833 | ETWQCDGDNDCSDGWDEHTNCTDTAGKKICVGDYLFQCDN    |
| Q04833 | CDGEDDCGDGSDEHSRHGCGNRCTDQEFHCTSNAKLAQPK    |
| Q04833 | HSTWECDGDNDCLDGSDEHANCTYSSCQPDFQCANHKCVP    |
| Q04833 | LYWADWNLREVLRCDKWTGKNETIILKKTVQLPNDLRIVHPM  |
| Q04833 | YTCSCPQFVLLSDQKTCEPNCTERQFACGGDDAKCIPKLW    |
| Q04833 | GESICGQRICPVGEFQCTNHNCTRPFFQICDGNDDCGDSSDE  |
| Q04833 | DDDCGDRSDEADTLCMSAERNCTAEFFRCNNKCIKAWRC     |
| Q04833 | FSEYGDCSSDQFKCANGKCVNGTVACDRKDDCGDASDEIGC   |

|        |                                             |
|--------|---------------------------------------------|
| Q04833 | GFRPDPQSPKECIDIDECAGNNTCTQLCLNTKGSYLCRCHE   |
| Q04833 | LMYWIDGSERTIYRSAIANGNQSHEGQKLDVDFEAMGVVPT   |
| P59383 | PTDSLVCVGLPAAGVTTLNLANRSLESPLSCLPRTLRSLDGS  |
| P59383 | NPLRALLPRTFACFPALRLLNLSCSELGHIAQEAFAGVDGG   |
| P59383 | VHTEIFQDTPNLQVLQFQNCNLSSFGPWNSQVLSVSLFGN    |
| P59383 | TFNLQVLQFQNCNLSSFGPWNSQVLSVSLFGNPLICSCEL    |
| P59383 | SLFGNPLICSCELAWLLVDVNKTVLHRAADTMCEPALGSTG   |
| P59383 | QGPIEQSTALSAQPGGSQQNITKVPSLTMTSPTQGSWMYK    |
| P59383 | ALPGAASSGAEQTATHILEPNISSASTPLVSKYLEPLPTSP   |
| P59383 | APNSVVLWYQIHYVAEGRSGNQSVVDIYATARQHPLYKLTTP  |
| Q13449 | LCLLPTGLPVRSVDFNRGTDNITVRQGDTAILRCVVEDKNS   |
| Q13449 | GDTAILRCVVEDKNSKVAWLNRSIIIFAGHDKWSDLPRVEL   |
| Q13449 | QHEPKTSQVYLIVQVPPKISNISSDVTVNEGSNVTLCMAN    |
| Q13449 | VQVPPKISNISSDVTVNEGSNVTLCMANGREPEPVIWTRHL   |
| Q13449 | NSANGLEIKSTEGQSSLTVTNVTEEYHGYNTCVAANKLGV    |
| Q13449 | KSTEGQSSLTVTNVTEEYHGYNTCVAANKLGVNASLVLFR    |
| Q13449 | VTEEYHGYNTCVAANKLGVNASLVLFRPGSVRGINGSISL    |
| Q13449 | KLGVNASLVLFRPGSVRGINGSISLAVPLWLLAASLLCLL    |
| P04651 | LGVAGVWASRGPLRPLCQPINATLAAEKEACPVCITFTTTSI  |
| P08751 | LSVGGVWASRGPLRPLCRPINATLAAEKEACPICITFTTTSI  |
| P01229 | HPINAILAVEKEGCPVCITVNTTICAGYCPTMMRVLQAVLP   |
| P01232 | LSVAGVWASRGPLRPLCRPINATLAAENEACPVCITFTTTSI  |
| P01231 | LGVAGVWASRGPLRPLCQPINATLAAEKEACPVCITFTTTSI  |
| P80691 | AIKNVKDNIVFESVDLNVKFNITINCNETTAWKVD RFPGVI  |
| P80691 | DNIVFESVDLNVKFNITINCNETTAWKVD RFPVIGWVTTL   |
| Q14766 | EGSFPLRYVDQVAAPFQLSNHTGRIKVVFTPSICKVTCTK    |
| Q14766 | PSICKVTCTKGSCQNSCEKGNTTTISENGHAADTLTATNF    |
| Q14766 | HLPCMNGGQCSSRDQCQPPNFTGKLCQIPVHGASVPKLYQ    |
| Q14766 | KPSYHGYNQMMEECLPGYKRVNNTFCQDINECQLQVCPNGE   |
| Q14766 | CINTAGSYDCTCPDGFQLDDNKTCQDINECEHPGLCGPQGE   |
| Q14766 | QQGFSISADGRTCEDIDECVNNTVCDSHGFCDN TAGSFRCL  |
| Q14766 | KKECYYNLDASLDCDNLVAPNVTKQECCTSGVGVGDNCEI    |
| P51884 | IKYLYLRNNQIDHIDEKAFENVTDLQWLILDHNHLENSKIK   |
| P51884 | IKGRVFSKCLKLKLHINHNNLTSVGPLPKSLEDLQLTHN     |
| P51884 | EDLQLTHNKITKLGSEGLVNLTFIHLQHNRLKEDAVSAAF    |
| P51884 | QYLRLSHNELADSGIPGNSFNVSLLVELDLSYNKLNIP TV   |
| P51890 | IKYLYLRNNMIEAIEENTFDNVTDLQWLILDHNHLENSKIK   |
| P51890 | IKGRVFSKLNKLLKLHINYNNL TEAVGPLPKTLDDLQLSHN  |
| P51890 | IQLSHNKITKVNPGALEGLVNLTVIHLQNNQLKTD S ISGAF |
| P51890 | QYLRLSHNKLTDSGIPGNVFNITSLVELDLSFNQLKSIPTV   |
| P51890 | CKVVGPLTYSKITHLRLDGNNLTRADLPQEMYNCLRVAADI   |

|        |                                             |
|--------|---------------------------------------------|
| Q9Z1Q4 | PEEPCREVFNETNHHKLGNYNTCCDKDNCNSPAPRPTPAL    |
| Q5SQ64 | GRPAPDPGKPGRESRLRLGNYSLWLEGSKEEDAGRYWCAV    |
| Q60767 | LYTAAQYRLALKDGYAVANTNTSDVWKKGGSEENLCAQPYH   |
| Q60767 | GLWQSVSCESQOPYVCKKPLNNTLELPDVWVYTDTHCHVWG   |
| Q60767 | TDTHCHVGWLPNNGFCYLLANESSWDAHLKCKAFGADLI     |
| Q60767 | RHGETCYKIYEKEAPFGTNCNLTIISRFEQEFLNMMKNYD    |
| Q60767 | YWFVADPHLNYEEAVLYCASNHSFLATITTSFTGLKAIKNKL  |
| Q60767 | SFLATITTSFTGLKAIKNKLANISGEEQKWWVKTSENPIDRY  |
| Q60767 | VDLSKRADCNAKLPFICERYNVSSLEKYSPPDPAKVQCTEK   |
| Q60767 | SHFHCALILNLKKSPLTGTWNFTSCSERHSLSLCQKYSETE   |
| Q60767 | RHSLSLCQKYSETEDEGQPWENTSKTVKYLNNLYKIIISKPLT |
| Q60767 | FWKTADCDDNQPGAICYYPGNETEEVVALDTAKCPSPVQS    |
| Q60767 | EQLLYFNYIASWVMLGITYENNSLMWFDKTALSYTHWRTGR   |
| Q60767 | FYQHSISACKIEMVDYEDKHNGTLPQFIPYKDGVSIVIKK    |
| Q60767 | VTIADENENKFVSRMLRENYNITMRVWLGLSQHSLDQSWSW   |
| Q60767 | SLDQSWSWLDGLDVTFVKWENKTKDGDGKCSILIASNETWR   |
| O88188 | QDIRKLFLDITLMAKSSILNYSYPLCEEDQPKFSFCGRRK    |
| Q9Y6Y9 | FFSTLFSSIFTEAQKQYWVCNSSDASISYTYCDKMQYPI SI  |
| Q9Y6Y9 | ICRGSDDDYSFCRALKGETVNTTISFSFKGIKFSKGYKCV    |
| Q9HBG7 | KDSAPTUVSGILGGSVTLPLNISVDTEIENVIWIGPKNALA   |
| Q9HBG7 | IENVIWIGPKNALAFARPKENVTIMVKSYLGRLDITKWSYS   |
| Q9HBG7 | VKSYLGRLDITKWSYSLCISNLTLDNAGSYKAQINQRNFV    |
| Q9HBG7 | FVYEQLEPQVTMKSVKVSENFSCNITLMCSVKGAEKSVLY    |
| Q9HBG7 | QLQEPQVTMKSVKVSENFSCNITLMCSVKGAEKSVLYSWTP   |
| Q9HBG7 | VTLPLALPACRDTEKVVWLFNTSII SKEREEAATADPLIKS  |
| Q9HBG7 | MYTWTPLQKEAVVSQGESHLNVSWRSSENHPNLCTASNPV    |
| Q9HBG7 | VVSQGESHLNVSWRSSENHPNLCTASNPVSRSSHQFLSEN    |
| Q9JHF9 | LFSTLLSPILTESEKQWFCNSSDAIISYSYCDHLKFPISI    |
| Q9JHF9 | LCHGHDDDDYSFCRALKGETVNTSIPFSFEGILFPKGYRCV   |
| P10253 | AQMGPWCFFPPSYPSYKLENLSSSEMGYTATLTRTPTFF     |
| P10253 | FSEEPFGVIVRRQLDGRVLLNTTVAPLFFADQFLQLSTSLP   |
| P10253 | GFHLCRWGYSSATAITRQVVENMTRAHFPLDVQWNDLDYMS   |
| P10253 | GPAGSYRPYDEGLRRGVFITNETGQPLIGKVPGSTAFPDP    |
| P10253 | LQFNLLGVPLVGADVCGFLGNTSEELCVRWTQLGAFYPFMR   |
| P10253 | GESLEVLERGAYTQVIFLARNTIVNELVRVTSEGAGLQLQ    |
| P10253 | TVLGVATAPQQVLSNGVPSNFTYSPDKVLDICVSLLMGE     |
| P70699 | PQIGQPWCFFPPSYPSYRLENLSTESGYTATLTRTSPPTFF   |
| P70699 | FSEEPFGVIVRRKLGGRVLLNTTVAPLFFADQFLQLSTSLP   |
| P70699 | GFHLCRWGYSSATAIVRQVVENMTRTHFPLDVQWNDLDYMDA  |
| P70699 | GPAGSYRPYDEGLRRGVFITNETGQPLIGKVPGSTAFPDP    |
| P70699 | GESLAVLERGAYTLVTFSAKNNTIVNKLVRVTKEGAELQLR   |

|        |                                            |
|--------|--------------------------------------------|
| P70699 | TVLGVATAPTQVLSNGIPVSNFTYSPDNKSLAIPVSLLMGE  |
| P14151 | TYHYSEKPMNWQRARRFRCDNYTDLVAIQNKAEIEYLEKTL  |
| P14151 | RSYYWIGIRKIGGIWTVGTNKSLTEEAENWGDGEPNNKKN   |
| P14151 | TASCQPWSCSGHGECVEI INNYTCNCDVGYGQCQFVIQC   |
| P14151 | HPLGNFSFSSQCAFSCSEGTNLGTIEETTCGPFGNWSSPEP  |
| P14151 | SCSEGTNLGTIEETTCGPFGNWSSPEPTCQVIQCEPLSAPD  |
| P14151 | EPTCQVIQCEPLSAPDLGIMNCSHPLASFSFTSACTFICSE  |
| P14151 | EGTELIGKKTICESSGIWSNFPSPICQKLDKFSMIKEGDY   |
| P16109 | TNQEVAAWTYHYSTKAYSWNISRKYCQNRYTDLVAIQNK    |
| P16109 | YLNKVLPHYSSYYWIGIRKNNKTWTWVGTCKALTNEAENWA  |
| P16109 | TASCQDMSCSKQGELETIGNYTCSCYPGFYGPCEYVREC    |
| P16109 | PECEYVRECGELELPQHVLNMC SHPLGNFSFNSQCSFHCTD |
| P16109 | ECGELELPQHVLNMC SHPLGNFSFNSQCSFHCTDGYQVNGP |
| P16109 | SFVHGSMDCSPSLRAFQYDTNCSFRCAEGFMLRGADIVRCD  |
| P16109 | APVCQALQCQDLVFPNEARVNC SHPFQAFRYQSVCSFTCNE |
| P16109 | WNSVPEPCQAIPTPLLS PQNGTMCVQPLGSSSYKSTCQF   |
| P16109 | LTPPGQGTMYCRHHPGTFGFNTTCYFGCNAGFTLIGDSTLS  |
| P16109 | TPACRAVKCSELHVNKPIAMNCSNLWGNFSYGSICSFHCLE  |
| P16109 | KCSELHVNKPIAMNCSNLWGNFSYGSICSFHCLEGQLLNGS  |
| P16109 | WGNFSYGSICSFHCLEGQLLNGSAQTACQENGHWSTTVFTC  |
| Q9Y5Y7 | QVSCRIMGITLVSKKANQQLNFTEAKEACRLGLSLAGKDQ   |
| Q9Y5Y7 | GVGVLIWKVPVSRQFAAYCYNSSDTWTNSCIPEIITTKDPI  |
| Q8BHC0 | ISTCRIMGVALVGRKNPQMNFTEANEACKMLGLTLASRDQ   |
| Q8BHC0 | GKGVLIWNAPSSQKFKAYCHNSSDTWVNSCIPEIVTTFYPV  |
| P45700 | RAQHYLELGAEIARTCHESYNRTYVKLGPEAFRFDGGVEAI  |
| Q16706 | LERLLAENNETIISNIRDSVINLSESVEDGPKSSQSNFSQGA |
| Q16706 | RDSVINLSESVEDGPKSSQSNFSQGAGSHLLPSQLSLSVDT  |
| Q29451 | TRRFIYVEIAFFSRWWRQQTATQKIVRELVRQGRLEFANG   |
| Q29451 | IRVNVLYSTPACYLWELNKANLSWSVKKDDFFPYADGPYMF  |
| Q29451 | SNALAHLSGLKEDFAFCRKLNISICPLTQTAERFQVIVYNP  |
| Q29451 | ELENLEQNLLLPVRQAFYWYNASTGNNLSSQASGAYIFRPN  |
| Q29451 | QNLLLPVRQAFYWYNASTGNNLSSQASGAYIFRPNQNKPLF  |
| Q29451 | VSHWAQTHLVKASLVQEVHQNFSAWCSQVVRLYPRQRHLEL  |
| Q29451 | DSNGREILERRRNYRPTWKLNQTEPVAGNYYPVNSRIYITD  |
| Q29451 | PETLLRLEHQFVAVGEDSGRNLSSPVTLDLTNLFAFTITN   |
| O00754 | TRRFIYVEIAFFSRWWRQQTATQEVVRDLVRQGRLEFANG   |
| O00754 | KELVDYFLNVATAQGRIYRTNHTVMTMGSDFYENANMWFK   |
| O00754 | SSVHVLYSTPACYLWELNKANLTSVKHDDFFPYADGPHQF   |
| O00754 | SNALARLRGFKDHTFCQQLNISICPLSQTAARFQVIVYNP   |
| O00754 | EIMNMNQLLLPVRQTFWYNASIGDNESDQASGAYIFRPN    |
| O00754 | QQLLLPVRQTFWYNASIGDNESDQASGAYIFRPNQKPLP    |

|        |                                            |
|--------|--------------------------------------------|
| O00754 | VSRWAQIHLVKTPLVQEVHQNFSAWCSQVVRLYPGQRHLEL  |
| O00754 | DSNGREILERRRDYRPTWKLNQTEPVAGNYYPVNTRIYITD  |
| O00754 | MVHRRLKDDGRGVSEPLMENGSGAWVRGRHLVLLDTAQAA   |
| O00754 | PEMVLLRLEHQFVAGEDSGRNLSAPVTLNLRDLFSTFTITR  |
| O00754 | KWTTNTGPTPHQTPYQLDPANITLPEMEIRTFILASVQWKEV |
| Q9Y2E5 | IFTHIMDQYSYCTPSHIPFSNRSGFYWNGVAVFPKPPQDGV  |
| Q9Y2E5 | GFYWNGVAVFPKPPQDGVYPMSEFVTPANINLYAEALVAN   |
| Q9Y2E5 | AAWFRTPHVLWFWGCDKQFFNASVQFANMDPLLDHINSHAA  |
| Q9Y2E5 | LGVSVQYATLGDYFRALHALNVTRVRDHHDFLPYSTEPFQ   |
| Q9Y2E5 | GFPGVVVTDEAGHPVPSQIQNSTETPSAYDLLILTTIPGLS  |
| Q9Y2E5 | YIVLLDQDTNLMHSIWERQSNRTVRVTQEFLEYHVNGDVKQ  |
| Q9Y2E5 | VEMEIVAGQLVTEIRQYFYRNMTAQNYTYAIRSRLTHVPQG  |
| Q9Y2E5 | VAGQLVTEIRQYFYRNMTAQNYTYAIRSRLTHVPQGHGDEL  |
| Q9Y2E5 | VIYSDNNGYQMQRFPYVSVYVNNIARNYYPMVQSAFMEDGK  |
| Q9Y2E5 | QVEVMLHRRLWNNFDWDLGYNLTLNDTSVVHPVLWLLGSW   |
| Q9Y2E5 | MLHRRLWNNFDWDLGYNLTLNDTSVVHPVLWLLGSWSLTT   |
| Q9Y2E5 | TLPPNLHLQILSIPGWRYSSNHTHSQNLRKGRGEAQADL    |
| P20916 | QVVHESFQGRSRLLDGLGRNCTLLSNVSPVPELGGKYYFRG  |
| P20916 | QGRSRLLDGLGRNCTLLSNVSPVPELGGKYYFRGDLGGYNQ  |
| P20916 | HFVPTREANGHRLGCQASFPNTTLQFEGYASMDVKYPPVIV  |
| P20916 | LQFEGYASMDVKYPPVIVEMNNSVEAIEGSHVSLCGADSN   |
| P20916 | VTPAEDGVYACLAENAYQDNRTVGLSVMYAPWKPTVNGTM   |
| P20916 | DDGEYWCVAENQYGRATAFNLSVEFAPVLLLESHCAAARD   |
| P20916 | CLCVVKSNEPEPSVAFELPSRNVTVNESEREFVYSERSGLVL |
| P20916 | VKSNEPEPSVAFELPSRNVTVNESEREFVYSERSGLVLTSL  |
| A2VE13 | FYFGAFLEEAATSLHDLRCNRTMTVQPLSDNQYNINVAA    |
| Q969L2 | FYFGAFLEEAATSLHDLHCNTTITGQPLSDNQYNINVAA    |
| Q18788 | NDLRRQKVKEMMIHAWEGYKNYSWGANELRPMKPKNSQNI   |
| Q18788 | TLFIMDLKDKYKEARDYIENNFMAKSTSTLSVFETTIRFL   |
| Q18788 | SLGALGDSFYEYLKSYVQSNYTDTPQAKNMYWDVSDAIQKH  |
| Q18788 | MYWDVSDAIQKHKMIKVSQSNLTYVELNNGQAQHKMGHLA   |
| P31723 | LADVLKFAFDTPSGVPYNNINITSHGNDGATTNGLAVTGTL  |
| P31723 | DRQDFIDFGLELVDGCEATYNSTLTKIGPDSWGWDPKKVPS  |
| P31723 | HRVTGKEIYRDWVWNAFVAINSTCRTDSGFAAVSDVNKANG  |
| C0HJB3 | GRVNALYSTPSLYTEAKNAANQTWPLKIDDYFPYADGRNAY  |
| C0HJB3 | KQSADQCSAPASAFSQCHLFNISYCPPTESLPPDKSLVVV   |
| C0HJW7 | FDYNVQERVNDFVAAALSQANITRVNALYSTPSIYTDAKYA  |
| Q93324 | TTHGYNTLVNLAGNWEFSSSNKTVNGTGTVPGDIYSDLYAS  |
| Q93324 | YNTLVNLAGNWEFSSSNKTVNGTGTVPGDIYSDLYASGIID  |
| Q93324 | VYVNGQKVLHSRNQFLPHYVNVTDIIALGENDITIKFKSSV  |
| Q93324 | VFSGNNEEAIRGHWWKASNYTESQQVKDYVLLYQRLAKI    |

|        |                                             |
|--------|---------------------------------------------|
| Q93324 | CASEYGVQSYPMKETMLNWINESDWEYTSKAMFHRQHHPGG   |
| Q93324 | SQVHQSIALKTQTLHYRRFRNNTTNEGLNMTCAMYWQLND    |
| Q93324 | DETFNLKVFLLNDNPYLLHNTVNVQMLSWGNGLDPILTN     |
| Q9UEW3 | LVVQVLNLQARLRVLEMYFLNDTLAAEDSPSFSLLQSAHPG   |
| Q9UEW3 | LQAQLTWVRVSHEHLLQRVDNFTQNPGMFRIKGEQGAPGLQ   |
| P48740 | GQIQSPGYPDSYPSDSEVTWNIITVDPGFRIKLYFMHFNLES  |
| P48740 | HNYIGGYCSCRFGYILHTDNRTCIVECDNLFTQRTGVIT     |
| P48740 | VDCRAPGELEHGLITFSTRNNLTTYKSEIKYSCQEPYKML    |
| P48740 | TTYKSEIKYSCQEPYKMLNNTGIYTCSAQGVMMNKVLGR     |
| Q9JJS8 | TKVLATLCGQESTDTERAPGNDTFYSLGPSLKVTFHSDYSN   |
| Q9JJS8 | PRIETDSNKVITITFTTDESGNHTGWKIHYTSTAQPCPDPTA  |
| Q9JJS8 | DRGGKDSRCRGS GGALVFLDNETQRWFVGGIVSWG SINCGG |
| Q91WP0 | TKVLATLCGQESTDTEQAPGNDTFYSLGPSLKVTFHSDYSN   |
| Q91WP0 | PRIETDSHKVITITFATDESGNHTGWKIHYTSTARPCPDPTA  |
| Q91WP0 | GWKIHYTSTARPCPDPTAPPNGSISPVQAIYVLKDRFSVFC   |
| Q91WP0 | HGAGFDNDIALIKLKNKVTINGSIMPVCLPRKEAASLMRTD   |
| Q91WP0 | ETGGKDSRCRGS GGALVFLDNETQRWFVGGIVSWG SINCGA |
| Q4ZIN3 | KFELDIEPKVFKPPSSTEALNDSQEFPPFETPTKVWVPQDEY  |
| Q8CIV2 | KFELDIEPKVFKPQSGADALNDSQDFPPFETPAKWVPQDEY   |
| O43462 | QLSFPVRAYKRLDGSSTECNNHSLTDVCFSYRNNFNKRLHT   |
| Q9GZU1 | TLESSESSYKNLTLKFHKLNVNTHFRLKTINLQSLINNEI    |
| P15529 | KCKKGYFYIPPLATHHTICDRNHTWLPVSDDACYRETCPYIR  |
| P15529 | CYRETCPYIRDPLNGQAVPANGTYEFGYQMHFICNEGYLI    |
| P15529 | MFECDKGFYLDGSDTIVCDSNSTWDPVPVKCLKVLPPSSTK   |
| O02839 | MPSDACDEPPKFESMRPQFLNNTYRPGDRVEYECRPGFQPM   |
| Q8NFP4 | YAPAQAQIVHAGQACVVKEDNISERVYTIREGDTLMLQCLV   |
| Q8NFP4 | VRWTKTAGSADKFKQETS VFNETLRIERIARTQGGRYCKA   |
| Q8NFP4 | QVSVRNVCGIPDKAITFRLTNTTAPPALKLSVNETLVVNPG   |
| Q8NFP4 | KAITFRLTNTTAPPALKLSVNETLVVNPGENVTVQCLLTGG   |
| Q8NFP4 | TAPPALKLSVNETLVVNPGENVTVQCLLTGGDPLPQLQWSH   |
| Q8NFP4 | LAQGGTSLIPSVQARDSGYYNCTATNNVGNPAKKTVNLLVR   |
| Q8NFP4 | TNNVGNPAKKTVNLLVRS MKNATFQITPDVIKESENIQLGQ  |
| Q8NFP4 | TYLCMASFPGAFVPDLSVEVNISSETVPTTISVPKGRAVVT   |
| Q8NFP4 | YSPEFYFDTPNPNTRSHKLSKNYSYVLQWTQREPDVAVDPVLN |
| Q8NFP4 | FGAGDMASRIIHYTEPINSPNLSDNTHCFEDEKICGYTQDL   |
| Q8NFP4 | IETSRPRELGDRLRVLVSPLYNASAKFYCVSFFYHMYGKHIG  |
| Q945K2 | VRGRVLGGTIIINAGVYARANTSIYSASGVWDMDLVNQTY    |
| Q945K2 | ARANTS IYSASGVWDMDLVNQTYEWVEDTIVYKPNSSQSWQ  |
| Q945K2 | SLPFTTTPPFGGFPASASYLPNSTFAHFASKVAGPLSYGSLT  |
| Q945K2 | TLKSSSNVRVSPNVKFNYSNLTDLSHCVSGMKGIGELLST    |
| P61870 | PLLSMGYVHVSPEYWITSPNNATVSTSDIKVIDGDVVSFDGN  |

|        |                                               |
|--------|-----------------------------------------------|
| Q00748 | FGTSSNVHALPLFGGGKLTNASREENNEALYDDSI SYGIL     |
| Q7Z7M0 | CKGQRQVLRREAPGFVTDGAGNYSVNGNCEWLI EAPSPQHRI   |
| Q7Z7M0 | FLGRACDLHLWENQGAGWWHNV SARDPAFSARIGAAGAFLS    |
| Q7Z7M0 | DNPTLGRCLQGDFSGPLGGGNC SLWVGEGLGLPVALPARWA    |
| Q7Z7M0 | GDPFRAGGSCFRECGGRALLTNVSSVALGSRRVGGLLPPGGG    |
| Q7Z7M0 | PMPVESPPLPCPTPCHLLPNCTSLDSK GADGGWQHCVWS      |
| Q7Z7M0 | GYTMDNMTGLCRPVCAQGC VNGSCVEPDHCRCHFVGRNC      |
| P04824 | LVADEQKFPNGMGHVADHLHNN SFLFGMYSSAGEYTCAGYP    |
| P04824 | GQFGTPEISYHRYKAMSDALNK TGRPIFYSLCNWGDLTIFY    |
| P04824 | GQNAGVGGWNDLDNLEVG VGNLTDDEEKAHFMSMWAMVKSPL   |
| P04824 | LDNGDQVVALLNGGSVSRPMNT LEEIFFDSNLGSKKLTST     |
| P04824 | GSKKLTSTWDIYDLWANRVDN S TASAILGRNKATATGILYNA  |
| P04824 | IYDLWANRVDNSTASAILGRNK ATATGILYNATEQSYKDGLS   |
| P04824 | DNSTASAILGRNKATATGILYN ATATEQSYKDGLSKNDTRLFGQ |
| P04824 | TATGILYNATEQSYKDGLSKND TRLFGQKIGSLS PNAI LNT  |
| P28825 | CLLSLIFSAAIAAVSIKHL LNGSDHDTDVGEQKDI FEINLA   |
| P28825 | IIFQKLSGCWSMIGDQQV GQNISIGEGCDFKATIEHEILHA    |
| P28825 | LNTPYDYESLMHYGPF SFNKNESIPTITTKIPEFNTIIGQL    |
| P28825 | IIGQLPDFSAIDLIRLNRMYN CTATHLLDHCDFEKTNVCG     |
| P28825 | EQVDHTLVGQCKGAGYFMFF NTSLGARGEAALESRI LYPK    |
| P28825 | TLNEEKKFRYVFLGTKGDPG NSSGGIYLLDDITLTETPCPAG   |
| P28825 | YLLDDITLTETPCPAGVWT IRNISQILENTVKGDKLVSPRFY   |
| P28825 | DQEADTRNRMSLTLMF TTSKNQTS SAINGSVIWRPSKVG V   |
| P28825 | NRMSLTLMF TTSKNQTS SAINGSVIWRPSKVG VYDKDCDC   |
| Q16820 | SLNVPYDYTSVMHYSKTA FQNGTEPTIVTRISDFEDVIGQR    |
| Q16820 | VIGQRMDFSDS DLLKLNQLYNCS SLSFMDSCSFELENVCG    |
| Q16820 | SESDQLNIYIREYSADNV DGNLTLVEEIKEIPTGSWQLYHV    |
| Q16820 | VFEGRKSGASLGGLS ID D INLSETRCPHHIWHIRNFTQFI   |
| Q16820 | SIDDINLSETRCPHHIWHIRN FTQFIGSPNGTLYSPPFYSS    |
| Q16820 | TRCPHHIWHIRNFTQFIGSP NGTLYSPPFYSSKGYAFQIYL    |
| Q16820 | DNGNYFWRPSKVGTV ALFSNGTQFRGGGYGTSAF I THER    |
| Q16820 | DFIKGDDVYI LLTVEDISHL NSTQIQLTPAPSVQDLCSKTT   |
| Q12866 | LAFKHTVGH I LSEHKGVKFNCS ISVPNIYQD TTISWWKDG  |
| Q12866 | DDEVTAIIASF SITSVQRSDNGSY ICKMKINNEE IVSDPIY  |
| Q12866 | DPIYIEVQGLPHFTKQPES MNVTRNTAFNLTCQAVGPPPEPV   |
| Q12866 | GLPHFTKQPESMN VTRNTAFNLTCQAVGPPPEPVNI FWWQNS  |
| Q12866 | FNLTCQAVGPPPEPVNI FWWQNS SRVNEQPEKSPSVLTVPGL  |
| Q12866 | KGVQINIKAI P SPPT EVSIRNSTAHS ILISWVPGFDGYSPF |
| Q12866 | TAHSILISWVPGFDGYSP FRNC SIQVKEADPLSNGSVMIFN   |
| Q12866 | DGYS PFRNC SIQVKEADPLSNGSVMIFNTS ALPHLYQIKQL  |
| Q12866 | NCSIQVKEADPLSNGSVMIFNTS ALPHLYQIKQLQALANYS    |



|        |                                              |
|--------|----------------------------------------------|
| Q12866 | IFNTSALPHLYQIKQLQALANYSIGVSCMNEIGWSAVSPWI    |
| Q12866 | AVSPWILASTTEGAPSVAPLNVTVFLNESSDNVDIRWMKPP    |
| Q12866 | LASTTEGAPSVAPLNVTVFLNESSDNVDIRWMKPPTKQQDG    |
| Q12866 | ISHVWQSAGISKEELLEEVGQNGSRARISVQVHNATCTVRIA   |
| Q12866 | ELLEEVGQNGSRARISVQVHNATCTVRIA AAVTRGGVGPFS   |
| Q0KHY3 | KLFVVCALACGFMAFVLANENISTEEFEDQI INAVPEPVKV   |
| Q0KHY3 | SMTQLHKNLNFQLPFYGRFNTRLSLNGYLEFSDPPEYLT      |
| Q0KHY3 | QGVVGADTFIPKHVVIATWKNVSFAGGIDNSLYTTNTFQMV    |
| Q0KHY3 | GGDTTKGEGGVPAFVGFNAGNGTQAYEYNPYSQNMVIRDLA    |
| Q0KHY3 | ALLPLTFAPESGNMLGGQVNI TGPCFDPAIRVTCHFDTES    |
| Q0KHY3 | TTDDVHKKNPAEIRITWNQYNLTSNANANVMISLWG YRETK   |
| Q0KHY3 | SNYINRNNINRDMQFGFLQINLTQPDQYSGLAISVPLWSRP    |
| Q0KHY3 | PVNYGVEVKATQLTAVAMRGNTTTTIEVRLRPLHARWRYRL    |
| Q0KHY3 | ESLKFQHFQDGVTVYTPYLLNQSQVVVQFDAGIGVEVENE     |
| Q0KHY3 | EVVENEGYMTGRVFLPWKFINKTAGLFGNWSFNKLD DFMFLP  |
| Q0KHY3 | MTGRVFLPWKFINKTAGLFGNWSFNKLD DFMFLPNGQVAQLN  |
| Q0KHY3 | PGVGAALFKREFGRMSGYANATFQPNYVLD PADFLPANRS    |
| Q0KHY3 | YANATFQPNYVLD PADFLPANRSYDLERAEE LCGECMQCQY  |
| P08581 | ECKEALAKSEMNVNMKYQLPNFTAETPIQNVILHEHHIFLG    |
| P08581 | TGPVLEHPDCFPQCDCSSKANLSGGVWKDNINMALVVD TYY   |
| P08581 | QLISCGSVNRGTCQRHVFPHNHTADIQSEVHCIFSPQIEEP    |
| P08581 | AKVLSVVKDRFINFFVGNNTINSYFPDHPHLSISVRRLKET    |
| P08581 | NKNNVRCLQHFGPNHEHCFNRTL LRNSSGCEARRDEYRTE    |
| P08581 | CLQHFGPNHEHCFNRTL LRNSSGCEARRDEYRTEFTTALQ    |
| P08581 | DFGFRNNKFDLKKTRVLLGNE SCTLTLSESTMNTLKT VVG   |
| P08581 | SESTMNTLKT VGPAMNKHFNMSTIISNGHGTQYSTFSYV     |
| P08581 | KNLNSVSVPRMVINVHEAGRNF TVACQHRNSSEIICCTTPS   |
| P08581 | EIKGNDIDPEAVKGEVLKVG NKSCENIHLHSEAVLCTVPND   |
| P08581 | EWKQAISSTVLGKIVQPDQNF TGLIAGVVSISTALLLLG     |
| Q13361 | LAVLADIAFSTDDLASLSEKN TTAECWDEKFTCTRLYSVHR   |
| Q9D1H9 | PVFCDMTTEGGKWTVFQKR FNGSVSFFRGSWDYKLGFGRAD   |
| Q9D1H9 | LHLLTLKQKYL RVDLED FENNTAYAKYIDFISISPNAISAE  |
| P55083 | PVFCDMTTEGGKWTVFQKR FNGSVSFFRGSWDYKLGFGRAD   |
| P55083 | MHLLTLKQKYL RVDLED FENNTAYAKYADFSISPNVSAE    |
| Q95114 | EDRTPPFYCLCPEGFTGL LCNETE HGPCFPNPNCHNDAECQV |
| Q95114 | QFQFIQVAGRSGDKIFIGNV NNSGLKINLFDTPLETQYVRL   |
| Q08431 | YPTSCHTACTLRFEL LGCELNGCANPLGLKNN SIPDKQITA  |
| Q08431 | LRFEL LGCELNGCANPLGLKNN SIPDKQITASSSYKTWGLH  |
| Q08431 | QGARNFGSVQFVASYKVAYS NDSANWTEYQDPRTGSSKIFP   |
| Q08431 | NFGSVQFVASYKVAYS NDSANWTEYQDPRTGSSKIFPGNWD   |
| Q08431 | WTEYQDPRTGSSKIFPGNWDN HSHKKNLFETPILARYVRIL   |

|        |                                             |
|--------|---------------------------------------------|
| Q8NHS3 | FFILLPWGNQFPKIQWEDLHNNIPNTTFGEIIIGLWKS PM   |
| Q8NHS3 | PWGNQFPKIQWEDLHNNIPNTTFGEIIIGLWKS PMEDDNE   |
| Q9XGM8 | KLNDVTVDWAKADLGYLTEGNYTKYFSGLVRQARPIQGS DL  |
| O43451 | RGCCWNPQGAVSVPWCYYSKNHSYHVEGNLVNTNAGFTARL   |
| O43451 | RHDMNKTWPIFNRDTPNGNGTNYLYGAQTFFLCLEDASGL    |
| O43451 | VNELHNNQKLVIIIVDPAISNNSSSSKPYGPDYDRGSDMKIW  |
| O43451 | NELHNNQKLVIIIVDPAISNNSSSSKPYGPDYDRGSDMKI WV |
| O43451 | SSSSKPYGPDYDRGSDMKI WVNSSDGVTPLIGEVWPGQTVFP |
| O43451 | NGQGYKQDQPASFGADSLLLNSRHYLNIRYTL LPYLYTLF   |
| O43451 | RAHSRGDTVARPLLHEFYEDNSTWDVHQQLWGPGLLITPV    |
| O43451 | PGDKIGLHLRGGYIFPTQQPNTTTLASRKNPLGLIIALDEN   |
| O43451 | VANKVYLLCEFSVTQNRLEVNISQSTYKDPNNLAFNEIKIL   |
| O43451 | KDPNNLAFNEIKILGTEEPSNVTVKHNGVPSQTSPTV TYDS  |
| O43451 | KIRDEEKIDCYPDENGASAENCTARGCIWEASNSSGV PFCY  |
| O43451 | DENGASAENCTARGCIWEASNSSGV PFCYFVNDLYSVSDVQ  |
| O43451 | RFVMVPYWLSLGFQLCRYGYQNDSEIASLYDEMVAQIPYDV   |
| O43451 | NRMKADGMRVILILDPAISGNETQPYPAFTRGVEDDVF I KY |
| O43451 | PNDGDI VWGKVPDFPDVVVNGSLDWDSQVELYRAYVAFPD   |
| O43451 | DWDSQVELYRAYVAFPDFFRNSTAKWWKREIEELYNNPQNP   |
| O43451 | NHNTIGTRRQDPVSWDVAFVNI SRTVLQTRYTL LPYLYTLM |
| O43451 | SQFLLGPAFLVSPVLERNARNVTAYFPRARWYDY YTGVDIN  |
| O77836 | QRSSLSAIVQQFKRVEAETNRSKDPVNKFSDDTLKILKEL    |
| O77836 | NVESYLFHSGNQDHPGDI LLNTTVEVLPLKSEGLDISKETK  |
| Q5JRA6 | SFESFEEMLDKLVPESENKTSNSSQVSNEQDKIDAYKL      |
| Q5JRA6 | DRKIQQESLGSAPLMGDDHPNASRDSVEGDALVNGAKLHTL   |
| Q20930 | SFVKRKVDGLKFSRVIKYTNETIQGMKTNFNSNKTQELSL    |
| Q20930 | SRVIKYTNETIQGMKTNFNSNKTQELSLDVLVVADFLSYQA   |
| Q20930 | EYLHALFEQTKIIYDGISFGNETLHMVFAGTWIATQERDCP   |
| Q20930 | EEERVLNEEIRLEEKERDLNSTFVDDTFFMNSTDSDNSST    |
| Q20930 | RLEEKERDLNSTFVDDTFFMNSTDSDNSSTDALISSDMPKK   |
| Q20930 | RDLNSTFVDDTFFMNSTDSDNSSTDALISSDMPKKLRKFVD   |
| Q20930 | SDMPKKLRKFVDITLEEMQENNSTEMTLKIDSKKAI DKFTI  |
| Q20930 | DMPKKLRKFVDITLEEMQENNSTEMTLKIDSKKAI DKFTI W |
| Q20930 | AVAVSGSADRQSFLNSRRMSNCSINSI IENLKEPTANCVKK  |
| P20774 | AKYNKIKSRGIKANAFKLNLLTFLYLDHNALESVPLNLPE    |
| P20774 | VIHLQFNNIASITDDTFCKANDTSYIRDRIEERLEGNP I V  |
| P19879 | LESVPLNLPESLRVIHLQFNNITSITDDTFCKANDTSY I RD |
| P19879 | VIHLQFNNITSITDDTFCKANDTSYIRDRIEERLEGNP I V  |
| Q9UNW1 | NDKLMRFFDHCEKFLTEVEKNATALYHVEAFKTGPEMQN I L |
| P13087 | YIVPVL RDHGGLTVSATTPNGTFVCP PRRVQTRKEVDHDR  |
| P81446 | APRGAETHLFTGTTRSSLFPNGSY PDLERYAGHRDQIPLGI  |

|        |                                            |
|--------|--------------------------------------------|
| P81446 | KSNNDPNQLWTIKRDGTIRSNGSCLTTYGYTAGVYVMIFDC  |
| P81446 | VMIFDCNTAVREATLWEIWGNGTI INPRSNLVLAASSGIKG |
| P81446 | GTTLTVQTLDYTLGQGWLAGNDTAPREVTIYGFRDLCMESN  |
| Q6ITZ3 | FLSGPGTHLFTGTRSSLPFNGSYPDLEQYAGHRKQIPLGI   |
| Q6ITZ3 | KSNNDPNQLWTIKRDGTIRSNGSCLTTYGYTAGVYVMIFDC  |
| Q6ITZ3 | VMIFDCNTAVREATIWQIWGNGTI INPRSNLALAASSGIKG |
| Q6ITZ3 | GTTLTVQTLDYTLGQGWLAGNDTAPREVTIYGFNDLCMESN  |
| P82683 | VMIFDCNTAVREATLWQIWGNGTI INPRSNLVLAASSGSSG |
| P82683 | GTTLTVQTVVSLGQGWLAGNDTAPREVTIYGFRDLCMEAN   |
| Q23490 | FNRHFPAQYDDGKGEPISSLNQSRPSAREANRVMSSAQSV   |
| Q23490 | FRFGHGMIEEFYKRVDSLGNITHGGFFFGDGVFKSGKILF   |
| Q23490 | DDFADMILDRNLRAGLARNYNTNDVDFYVGSMLLEDPVIGG  |
| P45452 | GVPDVGEYVFPRTLKWSKMNLTYRIVNYTPDMTHSEVEKA   |
| P45452 | SEVEKAFKKAFKVWSDVTPLNFTRLHLDGIADIMISFGIKEH |
| P03956 | FVLTEGNPRWEQTHLTYRIENYTPDLPRADVDAIEKAFQL   |
| Q9H306 | AYLNQFYSLEIEGNHLVQSKNRSLIDDKIREMQAFFGLTVT  |
| Q9H306 | RCGVPDVGYGYTLPGWRKYNLTYRIINYTPDMARAANVDEA  |
| Q9H306 | KGFFFSRSGSKQFEYDIKTKNITRIMRNTWFQCKEPKNSS   |
| P22894 | QDYLEKFYQLPSNQYQSTRKNGTNVIVEKLEKEMQRFGLNV  |
| P22894 | KNGTNVIVEKLEKEMQRFGLNVTGKPNETLDMMKKPRCGV   |
| P22894 | GVPDSSGFMLTPGNPKWERTNLTYRIRNYTPQLSEAEVERA  |
| P22894 | FQPGQIGGDAHFDAEETWNTSANYNLFVAAHEFGHSLG     |
| P22894 | AHSSDPGALMYPNYAFRETSNYSLPQDDIDGIAIYGLSSN   |
| Q9H8L6 | QNDVHRVADSLPGLWKALPGNLTAAVMEANQTGHEFPDRSL  |
| Q9H8L6 | SLPGLWKALPGNLTAAVMEANQTGHEFPDRSLEQVLLPHVD  |
| Q9H8L6 | LLPHVDTFLQVHFSPIWRSFNQSLHSLTQAIRNLSLDVEAN  |
| Q9H8L6 | FSPWRSFNQSLHSLTQAIRNLSLDVEANRQAISRVDQSAV   |
| Q9H8L6 | QADVDTKLRLHKAQEAPGTNGSLVLATPGAGARPEPDSLQ   |
| Q9H8L6 | GAGARPEPDSLQARLQQLQRNLSE LHMTTARREELQYTL   |
| Q9H8L6 | SDETFDQISKVERQVEELQVNHTALRELRVILMEKSLIMEE  |
| Q9H8L6 | EKSLIMEENKEEVERQLELNLTLQHLQGGHADLIKYVKDC   |
| Q9H8L6 | DVKNVGRCCAEAGAGAASLNASLHGLHNALFATQRSLEQH   |
| Q9H8L6 | EQHQRLFHSLFGNFQGLMEANVSLDLGKLQTMLSRKGKQKQ  |
| Q9H8L6 | PVAFYASFSEGTAALQTVKFNTTYINIGSSYFPEHGYFRAP  |
| Q13201 | SLLKSTLPPSETSAEAGVRNQTLTSTEKAEGVVKLQNLTL   |
| Q13201 | GVRNQTLTSTEKAEGVVKLQNLTLPTNASIKFNPGAESVVL  |
| Q13201 | LTSTEKAEGVVKLQNLTLPTNASIKFNPGAESVVLNSSTLK  |
| Q13201 | TLPTNASIKFNPGAESVVLNSSTLKFLQSFARKSNEQATSL  |
| Q13201 | MTDQVNYQAMKLTLLQKKIDNISLTVNDVRNTYSSLEGKVS  |
| Q13201 | KTVSSLSEDESTRQIQKVNESVVSIAAQKFVLVQENRP     |
| Q13201 | HLEGALEQEHSRSILYYESLNKTLKLEKHEQLLSTEQVS    |

|        |                                               |
|--------|-----------------------------------------------|
| Q13201 | LSTEQVSDQKNAPAAESVSNNVTEYMSTLHENIKKQSLMML     |
| Q13201 | QSLMMLQMFEDLHIQESKINNLTVSLMEKESLRGECEDML      |
| Q13201 | KCRNDFKFKLKDTEENLHVLNQTLAEVLFPMDNKMDKMSEQ     |
| Q13201 | RQTMTYEQPKEAIVIRKKIENLTSAVNSLNFI IKELTKRHN    |
| Q13201 | RDDALERRINEYALEMEDGLNKMTIINNAIDFIQDNYALK      |
| Q13201 | HKCTSDMETILTFIPQFHRLNDSIQTLVNDNQRYNFVLQVA     |
| Q13201 | YNFVLQVAKTLAGIPRDEKLNQSNFQKMYQMFNETTSQVRK     |
| Q13201 | GIPRDEKLNQSNFQKMYQMFNETTSQVRKYQQNMSHLEEKL     |
| Q13201 | FQKMYQMFNETTSQVRKYQQNMSHLEEKLLLTTKISKNFET     |
| Q13201 | SRFKALEAKSIHLSINFFSLNKTLHEVLTMCHNASTSVSEL     |
| Q13201 | LSINFFSLNKTLHEVLTMCHNASTSVSELNATIPKWIKHSL     |
| Q13201 | KTLEHVLTMCHNASTSVSELNATIPKWIKHSLPDIQLLQKG     |
| Q13201 | KGLTEFVEPIIQIKTQAALSNLTCCTDRSLPGLANVVKSQ      |
| Q13201 | SQKQVKSLPKKINALKKPTVNLTTVLIGRTQRNTDNI IYPE    |
| Q13201 | TCINGRTSFTCACRHPFTGDNCTIKLVEENALAPDFSKGSY     |
| P46557 | VITFLTLFNKNGDGPMDWQNADEVPLTTTSKATVSTTTTQ      |
| P46557 | PSQSPLTSDPSKFPPIHYVLNITIRDVRKPVLEGHMQLFAS     |
| P46557 | NLCLNHGSPMSAIAINSLINPNVSTSGISCFEKTVPLIAQQL    |
| P46557 | PLIAQQLSFVAFKTNPLFYNTTMDGAYLPEIDMIFNLNA       |
| P46557 | LQIVKKTRKMEVSKIRPRNLNETADSVRVLQRQIKSQSSNLC    |
| Q9ES58 | HVAVLLIWGVFAAESSCPDKNQTMQNNSSMTTEVNTTVFVQ     |
| Q9ES58 | LIWGVFAAESSCPDKNQTMQNNSSMTTEVNTTVFVQMGKKA     |
| Q9ES58 | SSCPDKNQTMQNNSSMTTEVNTTVFVQMGKALLCCPSISL      |
| Q9ES58 | RGQPSCII SYKADTRETHERSNCSDRSITWASTPDLAPDLQI   |
| Q9ES58 | QNIYDLQVLVPEVTHFPGENRTAVCEAIAGKPAAQISWTP      |
| Q9ES58 | IAGKPAAQISWTPDGDCAKNESHNGTVTVRSTCHWEQSH       |
| Q9ES58 | AAQISWTPDGDCAKNESHNGTVTVRSTCHWEQSHVSVVF       |
| Q9ES58 | HWEQSHVSVVFCVSHLTTGNQSLSIELGRGGDQLLGSYIQ      |
| Q9ES57 | ALAVLLIWGVFVAGSSCTDKNQTTQNNSSSPLTQVNTTVSV     |
| Q9ES57 | LIWGVFVAGSSCTDKNQTTQNNSSSPLTQVNTTVSVQIGTK     |
| Q9ES57 | IWGVFVAGSSCTDKNQTTQNNSSSPLTQVNTTVSVQIGTKA     |
| Q9ES57 | SCTDKNQTTQNNSSSPLTQVNTTVSVQIGTKALLCCFSIPL     |
| Q9ES57 | I IKLRGLPSCTIAYKVDTKNETSCLGRNITWASTPDHSPE     |
| Q9ES57 | SCTIAYKVDTKNETSCLGRNITWASTPDHSPQLISAVTL       |
| Q9ES57 | EKNYDLQVLVPEVTFPEKNRSVCEAMAGKPAAQISWSP        |
| Q9ES57 | AAQISWSPDGDVTTSESHSNGTVTVRSTCHWEQNNVSDVS      |
| Q9ES57 | SESHSNGTVTVRSTCHWEQNNVSDVSCIVSHLTGNQSLSIE     |
| Q9ES57 | CHWEQNNVSDVSCIVSHLTGNQSLSIELSRGGNQSLRPYIP     |
| Q9ES57 | CIVSHLTGNQSLSIELSRGGNQSLRPYIPYIIPSI I I I I I |
| Q19426 | DDRLPGYYWEADGRHFGKQNI SEAHKGVITDWDINDANGF     |
| Q19426 | RIRSYNFNKKYENVFQLAGKNYTKTQLKMAKVSLSNMLGSV     |

|        |                                            |
|--------|--------------------------------------------|
| Q19426 | HWIRITQSGPTRRTTYRWRGRNETIKTELNPKTLSSGLDDFP |
| Q13724 | AESLDELHWAPELGVFADFGNHTKAVQLKPRPPQGLVVRVVG |
| O88941 | AGSLDELHWAPELGVFADFGNHTKAVQLKSRPPQGLVVRVVG |
| P00304 | RAYALWSARQQFKTTDVLWFNFTTGEDSVAEVRREEAYHAC  |
| P43213 | VLFAVFLGSAYGIPKVPVPGPNIATYGDKWLDAKSTWYGKP  |
| P20645 | EKGKESKEKELALVKRLKPLFNKSFESTVQGSDTYIYIFRV  |
| P20645 | TVGQGSDTYIYIFRVCREAGNHTSGAGLVQINKSNGKETVV  |
| P20645 | IFRVCREAGNHTSGAGLVQINKSNGKETVVGRLNETHIFNG  |
| P20645 | GAGLVQINKSNGKETVVGRLNETHIFNGSNWIMLIYKGGDE  |
| P20645 | INKSNGKETVVGRLNETHIFNGSNWIMLIYKGGDEYDNHCG  |
| P24668 | EKDKEKNEVALLERLRPLFNKSFESTVQGSDTYSYIFRV    |
| P24668 | TVGQGSDTYSYIFRVCREASNHSSGAGLVQINKSNDKETVV  |
| P24668 | IFRVCREASNHSSGAGLVQINKSNDKETVVGRINETHIFNG  |
| P24668 | GAGLVQINKSNDKETVVGRINETHIFNGSNWIMLIYKGGDE  |
| P24668 | INKSNDKETVVGRINETHIFNGSNWIMLIYKGGDEYDNHCG  |
| P08169 | SFHSVGDSSLKTASRSLEFNFTTVNCKQNHKIQSSITFLC   |
| P08169 | AVCQVKKADSTQVKVAGRPNLTLRYSDGDLTLIYFGGEEC   |
| P08169 | FGGEECSSGFQRMSVINFEQNCTAGNNGRGAPVFTGEVDCT  |
| P08169 | LQTGQARGCPEDAACAVIDKNGSKNLGRFISSPTREKGNIQ  |
| P08169 | NIQLSYSDGDECGGQKITNITLMCKPGDLESAVPLTTSR    |
| P08169 | FYEFWRATAACVLSRTEGDNCTVFDSQAGFSFDLTPLTCK   |
| P08169 | ITFLCDRDAGVGFPEYQEEDNSTYNFRWYTSYACPEEPLC   |
| P08169 | GVAKTGPVMEVDSGSLLEEVNGSACTTSDQRRTTYTRIHL   |
| P08169 | DQVCSIKDPNSGYVFDLNLNNSRGYVVLGIGKTFLFNVCG   |
| P08169 | GRLVGLEKSLQLSTEGFTLNYTGLPSHPNGRADAFIIRFV   |
| P08169 | VTEDSKNLGVVQISPOVANGSLSLVVNGDKCKNQRFST     |
| P08169 | YCEVRDPRHGNYLNLIPLGLNDTVVRAGEYTYFRVCGELT   |
| P08169 | QKVAGLFNQKLTENGVLKMNITGGDTCHKVYQRSTTIFFY   |
| P08169 | LLFFSWHTPLACEQTTECSVRNGSSLIDLSPLIHRTGGYEAY |
| P08169 | ANEVYLNFESSTPCLADRFNYTSLITFHCKRGVSMGTPKL   |
| P08169 | PDEVKTDGCSLTDEQLYYSFNLSSLSKSTFKVTRGPHTYSV  |
| P08169 | LDVVDDRIVITYSKGHYCGDNKTASAVIELTCAKTVGRFSF  |
| P08169 | HFSWDSRAACAVKPEVQVMNGTITNPANGRSFSLGDIYFK   |
| P08169 | ASICQRKANDQHFSRKVGTSNQTRYYVDGDLDVVFTSSSK   |
| P11717 | TYHSVGDVLSRATSRSLEFNFTVSCDQOGTNHRVQSSIAF   |
| P11717 | AVCQVKKSDTSQVKAAGRYHNQTLRYSDGDLTLIYFGGDEC  |
| P11717 | FGGDECSSGFQRMSVINFECKNTAGNDGKGPVFTGEVDCT   |
| P11717 | LQEGKARGCPEDAACAVIDKNGSKNLGKFISSPMKEKGNIQ  |
| P11717 | NIQLSYSDGDGCGHKKIKTNTLVCKPGDLESAVPLRTSG    |
| P11717 | FYEFWHTAAACVLSKTEGENCTVFDSQAGFSFDLSPLTKK   |
| P11717 | ITFLCDRDAGVGFPEYQEEDNSTYNFRWYTSYACPEEPLC   |

|        |                                             |
|--------|---------------------------------------------|
| P11717 | GMAKTGPVVEDSGSLLLEYVNGSACTTSDGRQTTYTTRIHL   |
| P11717 | DQACSIIRDPNISGFVFNLNPLNSSQGYNVSGIGKIFMFNVCG |
| P11717 | RDPNSGFVFNLNPLNSSQGYNVSGIGKIFMFNVCGTMPVCG   |
| P11717 | VSEGNLWNLGVVQMSPPAAANGSLSIMYVNGDKCGNQRFS    |
| P11717 | NCEVKDPRHGNLYDLKPLGLNDTIIVSAGEYTYFVRVCGKLS  |
| P11717 | HKVAGLLTQKLTYEENGLLKMNFTGGDTCHKVYQRSTAIFFY  |
| P11717 | LFFSWHTPLACEQATECSVRNGSSIVDLSPLIHRGGYEAY    |
| P11717 | ANEIYLNFEESSTPCLADKHFNYTSLIAFHCKRGVSMGTPKL  |
| P11717 | PDEVMDGCTLTDEQLLYSFNLSLSTSTFKVTRDRSRTYSV    |
| P11717 | LGVIKDKVVVYTSKGYPCGGNKTASSVIELTCTKTVGRPAF   |
| P11717 | YFSWDSRAACAVKPEVQMVNGTITNPINGKSFSLGDIYFK    |
| Q07113 | NCRSVGDSLRRSSARSLEFNTMGCQPSDSQHRISITF       |
| Q07113 | AVCQEKKADSTQVKIAGRHNQTLRYSDGDLTLIYSGGDEC    |
| Q07113 | SGGDECSGGFQRMSVINFECKNTAGKDRGEPVFTGEVDCT    |
| Q07113 | LQEGKARNCPEDAAVCAVDKNGSKNLGKFSVSPTEKEGHIQ   |
| Q07113 | HIQLSYTDGDDCGSKKI STNITLVCKPGDLESAPVLRRAAR  |
| Q07113 | FYEFWHTAAACVLSKTEGENCTVLDAQAGFSFDLSLLTKK    |
| Q07113 | ITFLCDRDAGVGFPEYQEEEDNSTYNFRWYTSYACPEEPLC   |
| Q07113 | GVAKIGPVVEESGSLLLEYVNGSACTTSDGQLTTYSTRIHL   |
| Q07113 | DQACSIIRDPSSGFVFNLSPLNLSAQGHVVVLGIGKTFVFNIC |
| Q07113 | VSEDNSFNLGVVQISPPATGNGSLSILYVNGDRCDGRFST    |
| Q07113 | NCQVKDPRHGNLYDLKPLGLNDTIIVSAGEYTYLTVCGKLS   |
| Q07113 | QKVAGLLSQKLT FENGLLKMNYTGGDTCHKVYQRSTTIYFY  |
| Q07113 | ETSDCSYMFEWRTQYACPPFNVTESVQDAAGNSIDLSSLS    |
| Q07113 | SLSPHAGTEPCPEAAVCLLNGSKPVNLGKVRDGPQWTDGV    |
| Q07113 | TNPSHGHLFDLSSLSGRAGINASYSEKGLVFMSTICEENENC  |
| Q07113 | LFFSWHTPLACEQATECTVRNGSSIIDLSPLIHRGGYEAY    |
| Q07113 | ANEVYLNFEESSTHCLADRYMNYTSLITFHCKRGVSMGTPKL  |
| Q07113 | PDEVKTQGCVAVTDEQLLYSFNLSLSTSTFKVTRDARTYSI   |
| Q07113 | LEVIDETVIVYTSKGYPCGGNKTASSVIELTCAKTVGRPAF   |
| Q07113 | YFYWYSRAACAVRPEVMTVNGTTLNPNVTGKSFSLGEIYFK   |
| 095297 | LLTAGVSALEVYTPKEIFVANGTQKLTCKFKSTSTTGGLT    |
| 095297 | AGDLLDKDASINIENMQFIHNGTYICDVKNPPDIVVQPGHI   |
| Q3TEW6 | LLTARISALEVHTPKEIFVANGTQKLTCTFDSPNNTGWLT    |
| Q3TEW6 | AGDLLDKDASINIENIQAVHNGTYICDVKNPPDIVVRPGHI   |
| 070255 | TALCPTAEVEIYTSAGALEAVNGTDVRLKCTFSSFPVGDAL   |
| 070255 | DGNPERYDVSILLWKLQFDDNGTYTCQVKNPPDVGIVGTI    |
| 060487 | TALWPIAAVEIYTSRVLEAVNGTDARLKCTFSSFPVGDAL    |
| 060487 | DGNPERYDASILLWKLQFDDNGTYTCQVKNPPDVGIVGEI    |
| P22897 | VAITLYACDSKSEFQKWECKNDTLGIRGEDLFFNYGNRQE    |
| P22897 | NAKWENLECVQKLGYICKKGNNTLNSFVIPSESDVPTHCP    |

|        |                                              |
|--------|----------------------------------------------|
| P22897 | KKHHFYCYMIGHTLSTFAEANQTCNNENAYLTTIEDRYEQA    |
| P22897 | SGFWNDINCGYPNAFICQRHNS SINATTVMPTMPSVPSGCK   |
| P22897 | NDINCGYPNAFICQRHNS SINATTVMPTMPSVPSGCKEGWN   |
| P22897 | AFAWLQMETSNERVWIALNSLTDNQYTWTDKWRVRYTNA      |
| P22897 | KLKSACVYLDLDGYWKTACHNESFYFLCKRSDEI PATEPPQ   |
| P22897 | SKTNFWIGLFRNVEGTWLWINNSPVSVFNWNTGDPGERND     |
| Q9UBG0 | HGLQGCLQAQGGQVRVTPACNTSLPAQRKWKVSRNRLFNLG    |
| Q9UBG0 | RWHCRTLGDQLSLLLGARTSNI SKPGTLERGDQTRSGQWRI   |
| Q9UBG0 | GGWQNRDCSIALPYVCKKKPNATAEPTPPDRWANVKECEP     |
| Q9UBG0 | VSSLIYNWEGEYFWTALQDLNSTGSEFFWLSGDEVMYTHWNR   |
| Q9UBG0 | REDWGDQRCLTALPYICKRSNVTKETQPPDLPTTALGGCPS    |
| Q9UBG0 | AQLVTITNPLEQAFITASLPNVTFDLWIGLHASQRDFQWE     |
| Q9UBG0 | LGMNFNPKGGTLVWQDNTAVNYSNWGPPGLGPSMLSHNSCY    |
| Q64449 | RNRLFNLGATQCLGTGWVPTNTTVSLGMYECDREALSLRWQ    |
| Q64449 | RWQCRTLGDQLSLLLGARASNASKPGTLERGDQTRSGHWNI    |
| Q64449 | GGWQNHDCSIALPYVCKKKPNATVEPIQPDRWTNVKVECDP    |
| Q64449 | AQLVTIANPLEQAFITASLPNVTFDLWIGLHASQRDFQWIE    |
| Q64449 | LGMNFNPKGGTLVWQDNTAVNYSNWGPPGLGPSMLSHNSCY    |
| P33527 | LRGFCSADGSDPLWDWNVTWNTSNPDFTKCFQNTVLVWVPC    |
| P33527 | HVSALASNYWLSLWTD DP IVNGTQEHTKVRLSVYGALGISQ  |
| P21757 | AVLIPLIGIVAAQLKWKETKNCSVSSTNANDITQSLTGKGN    |
| P21757 | NCSVSSTNANDITQSLTGKGN DSEEMRFQEVFMEHMSNME    |
| P21757 | KRIQHILDMEANLMDTEHFQNFMTTDQRFNDILQLSTLF      |
| P21757 | SSVQGHGNAIDEISKSLISLNTTLLDLQLNIENLNGKIQEN    |
| P21757 | IQENTFKQQEIEISKLEERVYNVSAEIMAMKEEQVHLEQEI    |
| P21757 | MKEEQVHLEQEI KGEVKV LNNTNDRLRKDWHSQTLRNIT    |
| P21757 | LNNTNDRLRKDWHSQTLRNITL IQGPPGPPGEGKDRGPT     |
| O97148 | DILECDYFDTVDISAAQLQNGSYLFEGLLVPAILTGEYDF     |
| O97148 | PCVRFCCPHDHIMDNGVCYDNMSDEELAE LDPFLNVTLDDG   |
| O97148 | NGVCYDNMSDEELAE LDPFLNVTLDDGSVSRRHFKNELIVQ   |
| O97148 | CDGMFYLDNREEQDKYTLFENGTFFRHFDRVTLRKREYCLQ    |
| O97148 | DRVTLRKREYCLQHLTFADGNATSIRIAPHNCLIVPSITGQ    |
| O97148 | LFIIIMGLSWSLEIGSYFQSNTWANVFLVADYLNWSQGI I    |
| P34576 | SDTFIMDGNWDCEDGSEDEFINKTLTANCTRNNKVN IATNSL  |
| P34576 | DGNWDCEDGSEDEFINKTLTANCTRNNKVN IATNSLSLGKLK  |
| P34576 | YGTIMTPPEFHFNRDDIRCGNKTCGLHESCQKNSESYECI     |
| P34576 | CRCQDDYVDVSRREGARKPGRNCTQAINECASNLHNC DTHAI  |
| P34576 | PQOSDIARVAI I L TDGRSQDNVTGPADSARKLSINTFAIGV |
| P34576 | SLAPRYVNTKVDYIITHPKTKNSWDQGLLFKYEVTTKSQS     |
| P34576 | ELKNAFVTAEVNDIVNPVLMNASYDTGLLFNTTVHFRKGMV    |
| P34576 | VNDIVNPVLMNASYDTGLLFNTTVHFRKGMVHVPSDAYYQL    |

|        |                                             |
|--------|---------------------------------------------|
| P34576 | SVPGSLCVLDYCSVDNFCPTNTTCKNMEQQAECKCDAGFMD   |
| P34576 | LGDDTLCMHVRDVDECALGLNNCSGVAHCIDRAVGYTCKCP   |
| P34576 | GDDTLCMHVRDVDECALGLNNCSGVAHCIDRAVGYTCKCPD   |
| P34576 | ALLCDLCNAHGDCVHNTATNNITCVCTDGTGTPQCQVAPSN   |
| P34576 | NITCVCTDGTGTPQCQVAPSNASLVLLILLALLFLLLTLC    |
| Q8MI01 | ISILSSLLFGSHGEEGQKTNTTESTAEDLKTMENQSVPLE    |
| Q8MI01 | EEGQKTNTTESTAEDLKTMENQSVPLESKANLTSKDKENRET  |
| Q8MI01 | STAEDLKTMENQSVPLESKANLTSKDKENRETSNPKASNFSF  |
| Q8MI01 | SKANLTSKDKENRETSNPKASNFSFEDPSNKTHTETGFYSNLS |
| Q8MI01 | KENRETSNPKASNFSFEDPSNKTHTETGFYSNLSSTDNSSRSP |
| Q8MI01 | ASNFSFEDPSNKTHTETGFYSNLSSTDNSSRSPSLMPTLSPRS |
| Q8MI01 | FEDPSNKTHTETGFYSNLSSTDNSSRSPSLMPTLSPRSPSTHS |
| Q8MI01 | MPTLSPRSPSTHSFVSKLPWNSSIADNSLLPASAPPNTTVP   |
| Q8MI01 | KLPWNSSIADNSLLPASAPPNTTVPVSSENFTLSSINDTMK   |
| Q8MI01 | DNSLLPASAPPNTTVPVSSENFTLSSINDTMKAPDNSSITV   |
| Q8MI01 | SAPPNTTVPVSSENFTLSSINDTMKAPDNSSITVSNLPSGP   |
| Q8MI01 | PVSSENFTLSSINDTMKAPDNSSITVSNLPSGPNTTSTVTPM  |
| Q8MI01 | DTMKAPDNSSITVSNLPSGPNTTSTVTPMTEGWPTTTRESM   |
| Q8MI01 | SMEGFTVYQETTLHPTLKFTNNSKIFPNTSDPQENRNTGV    |
| Q8MI01 | YQETTLHPTLKFTNNSKIFPNTSDPQENRNTGVVFGAILG    |
| P43121 | VEVEVGSTALLKCGLSQSQGNLSHVDWFSVHKEKRTLIFRV   |
| P43121 | KREAGGGYRCVASVPSIPGLNRTQLVNVIAIFGPPWMAFKER  |
| P43121 | GPPWMAFKERKVVWKENMVLNLSCEASGHPRPTISWNVNGT   |
| P43121 | VLNLSCEASGHPRPTISWNVNGTASEQDQDPQRLSTLNLV    |
| P43121 | VTPELLETGVECTASNDLGKNTSILFLELVNLTTLTPDSNT   |
| P43121 | ECTASNDLGKNTSILFLELVNLTTLTPDSNTTGLSTSTAS    |
| P43121 | KNTSILFLELVNLTTLTPDSNTTGLSTSTASPHTRANSTS    |
| P43121 | PDSNTTGLSTSTASPHTRANSTSTERKLPEPESRGVVIVA    |
| Q8R2Y2 | VEAEVGSTALLKCGPSRASGNFSQVDWFLIHKERQILIFRV   |
| Q8R2Y2 | VTPELLETGAECTASNSLGSNTTIVLKLVTTLTLPDSSQ     |
| Q99102 | QTSTLTHRTTSTPSPSVHNVGTGTVSQKTSPSGETATSSL    |
| Q99102 | VSQKTSPSGETATSSLCSVTNTSMMTSEKITVTTSTGSTLG   |
| Q99102 | SSSPMLDRHTSQQITAPSTNHSTIHSTSPQESPAVSQR      |
| Q99102 | GVSYTFNGLGDFLLVGAQDGNSSFLQGRTAQTGSAQATNF    |
| Q99102 | GPVTVQWLEPHDAIRVLLDNQTVTFQPDHEDGGQETFNA     |
| Q99102 | DNQTVTFQPDHEDGGQETFNATGVLLSRNGSEVSASFQGW    |
| Q99102 | DHEDGGQETFNATGVLLSRNGSEVSASFQGWATVSVIALS    |
| Q99102 | SVIALSNI LHASASLPPEYQNRTEGLLGWNNNPEDDFRMP   |
| Q99102 | RTEGLLGWNNNPEDDFRMPNGSTIPPGSPEEMLFHFGMTW    |
| Q99102 | TIPPGSPEEMLFHFGMTWQINGTGLLGRNDQLPSNFTPVF    |
| Q99102 | KRNDQLPSNFTPVFYSQLQKNSWAEHLISNCDGDSSCIYD    |



|        |                                            |
|--------|--------------------------------------------|
| Q99102 | HLISNCDGDSSCIYDTLALRNASIGLHTREVSKNYEQANAT  |
| Q99102 | LRNASIGLHTREVSKNYEQANATLNQYPPSINGGRVIEAYK  |
| Q99102 | IEAYKGQTTLIQYTSNAEDANFTLRDSCDLELFENGTLW    |
| Q99102 | NAEDANFTLRDSCDLELFENGTLWTPKSLEPFTLEILAR    |
| Q99102 | SALQPRTVVCHCNAESQCLYNQTSRVGNSSLEVAGCKCDGG  |
| Q99102 | VVCHCNAESQCLYNQTSRVGNSSLEVAGCKCDGGTFGRYCE  |
| Q99102 | EPCFPSVHCVPGKGCEACPPNLTGDGRHCAALGSSFLCQNO  |
| Q99102 | PNLTGDGRHCAALGSSFLCQNOQSCPVNYCYNQGHYISQTL  |
| Q99102 | PTVNLELPLRVIQLLLSEENASMAEVNASVAYRLGTLDMR   |
| Q99102 | PLRVIQLLLSEENASMAEVNASVAYRLGTLDMRAFLRNSQ   |
| Q99102 | RNDVVFQPISGEDVRDVTALNVSTLKAYFRCDGYKGYDLVY  |
| P98088 | LVLMMNHDDSLLELDTKYANKTCGLCGDFNGMPVVSSELLS  |
| P98088 | LQKMDDPDQCCQDPVPEPRNCSTGFGICEELLHGQLFSGC   |
| P98088 | ACVYNGAAYAPGATYSTDCTNCTCSGGRWSCQEVPCPGTCS  |
| P98088 | KASGEVFLNQIYTQLPISAANVTIFRPSTFFIIAQTSGLQ   |
| P98088 | DVIYHTTDGTGGCISARCGANGTIERRVYPCSPTTPVPPTT  |
| P98088 | SAPTASTTSAPTSTSSAPTNTTSAPTSTTSAPITSTISA    |
| P98088 | ELGCPNAVPPRKKGETWATPNCSEATCEGNNVISLRPRTCP  |
| P98088 | SGWGDPHYITFDGTYTFLDNCTYVLVQQIVPVYGHFRVLV   |
| P98088 | VQVMFSGLIFSVEVPFSKFANNTEGQCCTNDRKDECRTP    |
| P98088 | ECRTPRGTVVASCSEMSGLWNVSI PDQPACHRPHPTPTTVG |
| P98088 | CPADKVYQPCGSPNSPYCYGNDSASLGALPEAGPITEGCFC  |
| P98088 | VPVPAAPQAGQCCPYSCACNTRCPAPVGCPEGARAIPTY    |
| P98088 | CPEGARAIPTYQEGACCPVQNCSTVCSINGTLYQPGAVVS   |
| P98088 | TYQEGACCPVQNCSTVCSINGTLYQPGAVVSSSLCETCRC   |
| P98088 | EYQEQSGQCCGTCVQVACVTNTSKSPAHLFYPGETWSDAGN  |
| P98088 | ARMSKDGCCRFPPPPPPYQNSTCAVYHRSLIIQQQGCSS    |
| P98088 | EGNTVEHRCQCQELRTSLRNVTLHCTDGSSRAFSYTEVEE   |
| Q98UI9 | PCMFQGVYSSGGTYSTPCQNTCKGGHWSCISLPCSGSCS    |
| Q98UI9 | IRVQMKPVMQLSITVDHSYQNRTSGLCGFNFIQTDDEFRTA  |
| Q98UI9 | PCSNSVDKEKFAQHWCALLSNTSSFAACHSVVDPSPVIKR   |
| Q98UI9 | CDPSEECPETMVYNSVKYCNQSCRSLDEPDPLCKVQIAPM   |
| Q98UI9 | LDCIGETVLVKDCPAPMYFNCSSAGPAIGSECQKSKCTQ    |
| Q98UI9 | KPGETIRVDCNTCTCNKRQWNCTDNPCKGTCTVYGNHYMS   |
| Q98UI9 | EMSIQEFGNSWKITSTCSNINMTDLCADQPFKSAALGQKHCS |
| Q98UI9 | LCTEDSKDCLCCYNGKTYPLNETIYSQTEGKCGNAFCGPN   |
| Q98UI9 | PATALAPMSDCLGLIPPRKFNESWDFGNCQIATCLGEENNI  |
| Q98UI9 | SGWGNEHYVTFDGTYYHFKENCTYVLVELIQPSSEKFWIHI  |
| Q98UI9 | VYVYSRLAFYIKLPPFGKYNNMGLCGTCTNQKSDDARKR    |
| Q98UI9 | PVKIENYQHCEPSELCKI IWNLTECHRVPVPPYAEACVAS  |
| Q98UI9 | KPREAWEHDCQYCTCDEETLNI SCFPRPCA KSPINCTKEG |

|        |                                             |
|--------|---------------------------------------------|
| Q98UI9 | DEETLNISCFPRPCA KSP PINCTKEGFVRKIKPRLDDPCCT |
| Q98UI9 | LDDPCCTETVCECDIKTCIINKTACDLGFQPVVAISEDGCC   |
| Q98UI9 | NFFFGSVTIEVGKSYKAPYDNCTQYTCTESGGQFSLTSTVK   |
| Q9HC84 | SRPVVTRVVIKAQGLVLEASNGSVLINGQREELPYSRTGLL   |
| Q9HC84 | LTFLWNGEDSALLELDPKYANQTCGLCGDFNGLPAFNEFYA   |
| Q9HC84 | LQKLDGPTEQC PDPLPLPAGNCTDEEGICHRTLLGPAFAEC  |
| Q9HC84 | PLGQCPCTHGGRTYSPGTSFNITC SSSCTCSGGLWQCQDLPC |
| Q9HC84 | QADGGVFLNSIYTLPLSAANITLFTPSSFFIVVQTGLGLQ    |
| Q9HC84 | GASLQKSTGCAAPMVYLDCSNS SAGTPGAELRSCHTLDVDG  |
| Q9HC84 | DRYSFEGSCEYILAQDYCGDNTHGTFRIVTENIPC GTTGT   |
| Q9HC84 | LEACTCTYEDRTYSQDV IYNTTDGLGACLIAICGSNGTII   |
| Q9HC84 | DVIYNTTDGLGACLIAICGSNGTIIRKAVACPGTPATTPFT   |
| Q9HC84 | AGGHLCQQPKDIECQAESFPNWT LAQVGQKVHCDVHFGLVLC |
| Q9HC84 | STSQAETSTPRTE TMSPLTNTTTSQGTTRCQPKCEWTEWF   |
| Q9HC84 | TSSTVTPSSALGTTHTPPVPNTATTHGRSLSPSSPHTVRT    |
| Q9HC84 | TSSTVTPSSALGTTHTPPVPNTATTHGRSLSPSSPHTVRT    |
| Q9HC84 | TSSTVTPSSALGTTHTPPVPNTATTHGRSLSPSSPHTVRT    |
| Q9HC84 | PETHTTSTVLTTTATMTRATNSTATPSS TLGTRILTELT    |
| Q9HC84 | STPCFCRAFGQFFSPGEVIYNKTD RAGCHFYAVCNQHCDID  |
| Q9HC84 | PLSSPSPAPGCDNAIPLRQVNETW TLENCTVARCVGDNRVV  |
| Q9HC84 | APGCDNAIPLRQVNETW TLENCTVARCVGDNRVVLLDPKPV  |
| Q9HC84 | TVARCVGDNRVVLLDPKPVANVTC VNKHLPIKVS DPSQPCD |
| Q9HC84 | SMWGGSHYSTFDGTSYTFRGNCTY VLMREIHARFGNLSLYL  |
| Q9HC84 | YTFRGNCTYVLMREIHARFGNLSLYLDNHYCTASATAAAAR   |
| Q9HC84 | VSVTFNGQVFQARLPYSLFHNNT EGQCCTNNQRDDCLQR    |
| Q9HC84 | VTVTRPRAENPCCPETVVCNNTTTC PQSLPVCPPGQESICT  |
| Q9HC84 | TQEEGDCCFTFRCRPQLCSYNGTFYGVGATFP GALPCHMCT  |
| Q9HC84 | CTCLSGDTQDPTVQCQEDACNNTTC PQGFYKRVAGQCCGE   |
| Q9HC84 | TCLSGDTQDPTVQCQEDACNNTTC PQGFYKRVAGQCCGEC   |
| Q9HC84 | CCGECVQTA CLTPDGQPVQLNETWVNSHVDNCTVYLCEAEG  |
| Q9HC84 | LTPDGQPVQLNETWVNSHVDNCTVYLCEAEGGVHLLTPQPA   |
| Q9HC84 | SLRKTGCCYSCEEDSCQVRINTTILWHQGCETE VNI TFCEG |
| Q9HC84 | SCQVRINTTILWHQGCETE VNI TFCEGSCPGASKYSAEAQA |
| Q9HC84 | QCTCCQERRVHEETVPLHCPNGSAILHTYTHVDECGCTPFC   |
| P12021 | EGAGTSGVGFKTEATTFPGENETTRVGIATGTTGIVSRKTL   |
| P12021 | GTGSRPGTTGELSGTTIASGNATTEATSTETRIGPQTGAQ    |
| P12021 | SPKVSSPETTAGATEDQENENKTGCPAPLPPPVCHGPLGE    |
| P12021 | KECPSPTCKTGERLIKFKANDTCCEIGHCEKRTCLFNNTD    |
| P12021 | FKANDTCCEIGHCEKRTCLFNNTDYE VGSFFDDPNNPCVTY  |
| P12021 | VYDSKQCCYTCKSSCKPSVNVTVRYNGCTIKVEMARCVGE    |
| P04220 | WTRQDGEAVKTHTNISESHPNATFSAVGEASICEDDWDSDGE  |

|        |                                             |
|--------|---------------------------------------------|
| P28665 | VPSQLYTETPEKICLHLYQLNETVTVTASLVSQSGRKNLFD   |
| P28665 | TGCREVNSQLDNNGCSTQEVNITELQSKKRNYEVQLFHVNA   |
| P28665 | VNITELQSKKRNYEVQLFHVNAVTEEGTGLEFSRSGTTKI    |
| P28665 | LKELIFYYLVMAGGSI IQTGNHHTQVEPGEAPVKGKFALEI  |
| P28665 | LTETIRKYFPEWVWDIVTVNSTGLAEVEMTVPDTITEWKA    |
| P28665 | VEMTVPDTITEWKAGALCLSNDTGLGLSSVVP LQAFKPFV   |
| P28665 | SANGRHTSSWLVTPKSLGNVNFVSAEAQQSSEPCGSEVAT    |
| P28665 | GCGEQNMVLFAPNIYVLKYLNETQQLTQKIKTKALGFLRAG   |
| P28665 | VVSKALSCLESSWKTIEQERNASFVYTKALMAYAFALAGNQ   |
| P28665 | GNQNKRDEILKSLDEEAIKENNSIHWKR PQKSRKSEHHLK   |
| P28665 | HVSRTEVSNNNVLIYLDQVTNQTAFSFI IQQDI PVRNLQP  |
| P04939 | EASEREREIEEHGSMRAFVENITVLENSLVFKFHLLIVNEEC  |
| Q62838 | KLVKLEVEVFARILRAPESHNVTFGSFVTLRCTAIGMPVPT   |
| Q62838 | AQYRGEVCDAVLVKDSLFFNTSYDPDEEAQELL IHTAWNE   |
| Q62838 | SMHQDPTACTRLPYLDYKKENITTFPSITSSKPSVDIPNLP   |
| P10522 | VGDPHRKDGSIVIHNLDYGDNGTFTCDVKNPPDIVGKTSQV   |
| P29736 | IEGTIGRGLNIWDGFTHRYPNKSGPDHNGDPTCDSFSYWQ    |
| P29736 | DTTCDSFSYWQKIDVLDDELNATGYRFSIAWSRI IPRGKRS  |
| P29736 | SALDAPGRCSPTVDPSCYAGNSSTEPYIVAHHQLLAHAKVV   |
| P29736 | YIVAHHQLLAHAKVVLDYRKNYTHQGGKIGPTMITRWFLPY   |
| P29736 | YTHQGGKIGPTMITRWFLPYNDTDRHSIAATERMKEFFLGW   |
| P29736 | IAATERMKEFFLGWFMGPLTNGTYPQIMIDTVGERLPSFSP   |
| P29736 | DFLGLNYFTQYQAQSPNPNVNSTNHTAMMDAGAKLTYINAS   |
| P29736 | GLNYFTQYQAQSPNPNVNSTNHTAMMDAGAKLTY INASGHY  |
| P29736 | PVNSTNHTAMMDAGAKLTYINASGHYIGLFEKDKADSTDN    |
| Q02083 | LLLLAGAGLSAASPPAAPRFNVSLDSVPELRWLPVLRHYDL   |
| Q02083 | LERFLPQPFTGEIRGMCDFMNL SLADCLLVNLAYESSVFCT  |
| Q02083 | DHWKPAKEDDRRTSAIKALNATGQANLSLEALFQILSVVP    |
| Q02083 | QANLSLEALFQILSVVPVYNNFTIYTTVMSAGSPDKYMTRI   |
| Q9W4C5 | CVNSRPQEYVDNLLTGVS LANESARNLSGIVANDETEKLQS  |
| Q9W4C5 | PQEYVDNLLTGVS LANESARNLSGIVANDETEKLQSSSELY  |
| Q90744 | GCYSSGKEQAQGYPMARALNSTGRPIVYSCSWPAYQGGLP    |
| Q90744 | RPIVYSCSWPAYQGGLPKVNYYTLGECINLWRNYDDIQDS    |
| Q90744 | AYEVQDVYSGKIISGLKTGDNFTVIINPSGVMMWYLCPKAL   |
| P17050 | FLADYVHSLGLKGIYADMGNFTCMGYPGTTLDKVVQDAQT    |
| P17050 | GCFSTPEERAQGYPKMAAALNATGRPIAFSCSWPAYEGGLP   |
| P17050 | RPIAFSCSWPAYEGGLPPRVNYSLLADICNLWRNYDDIQDS   |
| P17050 | VFFSCRTDMPYRYHSSLGQLNFTG SVIYEAQDVYSGDI ISG |
| P17050 | IYEAQDVYSGDIISGLRDETNTFTVIINPSGVMMWYLYPIKN  |
| Q9Y3Q0 | KKFGLDSAKLVHYDVLVLSYPNETNANYISIVDEHETEIFKT  |
| Q9Y3Q0 | EHETEIFKTSYLEPPPDGYENVNIVPPYNAFSAQGMPEGD    |

|        |                                                               |
|--------|---------------------------------------------------------------|
| Q9Y3Q0 | VYVNYARTEDFFKLEREMGINCTGKIVIARYGKIFRGNKVK                     |
| Q9Y3Q0 | ILLRYLGGIAPPDKSWKALNVSYSIGPGFTGSDSFRKVRM                      |
| Q9Y3Q0 | VKILQERSIAYINSDSSI EGN YTLRVDCTPLLYQLVYKLT K                  |
| Q9Y3Q0 | IPFNIQDYAEALKNYAASIYNLSKKHDQQLTDHGVSFDSL F                    |
| Q9Y3Q0 | HDQQLTDHGVSFDSLFSAVKNFSEAASDFHKRLIQVDLNNP                     |
| Q9CZR2 | KKFGLDSANLVHYDVLLSYPNETNANYVSI VDEHGVEI FKT                   |
| Q9CZR2 | EHGVEI FKT SYLEPPPDGYENV TN I I P P Y N A F S A S G M P E G E |
| Q9CZR2 | VYVNYARTEDFFKLEREMINCTGKIVIARYGKIFRGNKVK                      |
| Q9CZR2 | RLLRN LGGAAPPDKSWKGLNVS YNIGPGFTGSEYSR NIRM                   |
| Q9CZR2 | NLGGAAPDKSWKGLNVS YNIGPGFTGSEYSR NIRMHVNN                     |
| Q9CZR2 | AKLLQERSIAYINSDSAI EGN YTLRVDCTPLLNQLVYKVAR                   |
| Q9CZR2 | IPFNIQDYAKALKNYAASIFNI SKKHDQQLRNHAVSFDFL F                   |
| Q9CZR2 | HDQQLRNHAVSFDFLFSAVKNFSEAASDFHRRLTQVDLNNP                     |
| O09043 | LSKFMNTQYFGTIGLGT PPQNFTVVFDTGSSNLWVPSTRCH                    |
| O09043 | SLACWFHHRFNPKASSFRPNGTKFAIQYGTGRLSGILSQD                      |
| O09043 | GTKFAIQYGTGRLSGILSQDNLTI GGIHDAFVTFGEALWEP                    |
| O09043 | QCSKTPTLPPVSFHLGGVWFNL TGQDYVIKILQSDVGLCLL                    |
| Q13508 | NEVFQVSQEGAGNNLILQSINKTCSHYECAF LGGLKTENCI                    |
| Q21432 | SVQLRFDRTLQIKEALEKGNLTADIVVDNGVYDLDTMLT                       |
| Q21432 | HALGVAHQHLRNRDRDQFITINWSNIDPQQYDAFVVVDSKLY                    |
| Q22396 | FYNLPLEMQAMFRDAINYLENHTCLKFEYNENAETAVRIRK                     |
| Q22396 | VMLYARDPHSDKRIPIDPEYNFTMGSLRVAFYDMVLLNKFY                     |
| Q22396 | YKTDRRIVSPLVCCDNDNLWNKTR SSTNNPFI IAKYGNRT                    |
| P98061 | GRQGVAPPVTF AALNYGPKNNQTKKFEELNQDINEYTFESD                    |
| P98061 | SMGQREAPAFSDIIGVNKLYNCTS QCKIQMKCSNCGITDSR                    |
| P98061 | SWETFDAKAGDPSSFSSTDNSTNCYWHIKAPEGQOIEFKM                      |
| Q21059 | IGQRVAPSFADVKRINFAYCNSTCSNYLDCQNGGYINPND C                    |
| P98060 | DGSHTRQREQRI IELALEHWHNITCLNFQRNDQANSGRIVF                    |
| P98060 | EFEMYCKIRHSLCMDYVEVRNSTDFANTGMRYCCYGT PPTR                    |
| P13590 | KDIQVIVNPPSVRARQSTMNATANLSQSVTLACDADGFPE                      |
| P13590 | EQDATIHLKVFAKPKITYVENKTAMELEDQITLTCEASGDP                     |
| P13590 | LTCEASGDPIPSITWKTSTRNISNEEKTLDGRIVVRSHARV                     |
| P13590 | QYAPKLQGFVAVYTWEQNVNITCEVFAYPSAVI SWFRDGO                     |
| P13590 | FAYPSAVI SWFRDGOQLPSSNYSNIKIYNTPSASYLEVTPD                    |
| P13590 | TPSASYLEVTPDSEDFGNYNCTAVNRIGQESSEF ILVQAD                     |
| P13591 | KDIQVIVNPPPTIARQNI VNATANLGQSVTLVCD AEGFPE                    |
| P13591 | EQDATIHLKVFAKPKITYVENQTAMELEEQVTLTCEASGDP                     |
| P13591 | LTCEASGDPIPSITWRTSTRNISSEKASWTRPEKQETLDG                      |
| P13591 | QYAPKLQGFVAVYTWEQNVNITCEVFAYPSATI SWFRDGO                     |
| P13591 | FAYPSATI SWFRDGOQLPSSNYSNIKIYNTPSASYLEVTPD                    |
| P13591 | TPSASYLEVTPDSEDFGNYNCTAVNRIGQESSEF ILVQAD                     |

|        |                                             |
|--------|---------------------------------------------|
| P13595 | KDIQVIVNVPPVTQARQSVNATANLQGQSVTLVCDADGFPE   |
| P13595 | EQDASIHVKVFAKPKITYVENQTAMELEEQVTLTCEASGDP   |
| P13595 | LTCEASGDFIPISITWRTSTRNISSEKTLDGHMVVRSHARV   |
| P13595 | QYAPKLQGFVAVYTWEGNQVNI TCEVFAYPSATISWFRDGO  |
| P13595 | FAYPSATISWFRDGOQLPSSNYSNIKIYNTPSASYLEVTPD   |
| P13595 | PSATISWFRDGOQLPSSNYSNIKIYNTPSASYLEVTPDSEN   |
| P13595 | TPSASYLEVTPDSENDNFGNYNCTAVNRIGQESLEFILVQAD  |
| O15394 | TISDNRFAMLANNLQILNINKSDEGIYRCEGRVEARGEID    |
| O15394 | RDIIIVIVNVPPAISMPOKSFNATAERGEEMTFSCRASGSPE  |
| O15394 | EDEKQAFLOVQVPHI IQLKNETT YENGQVTLVCDAGEPEI  |
| O15394 | IGGHQKSMYLDIEYAPKFI SNQTIYYSWEGNFINISCDVKS  |
| O15394 | YAPKFI SNQTIYYSWEGNFINISCDVKS NPPASIHWRDRL  |
| O15394 | KSNPPASIHWRDRLVLPKNTNLKTYSTGRKMILEIAPT      |
| O15394 | TGRKMILEIAPTSDNDFGRYNTATNHIGTRFQEYILALAD    |
| O15394 | WKIVRSHGVQTMVV LNNLEPNTY EIRVA AVNGKGGDYSK  |
| P55067 | RVAKGWQGRVSLPAYPRHRANATLLGLPLRASDSGLYRCQV   |
| P55067 | TPRRRCGGSAPGVRTVYRFANRTGFPAPGARFDAYCFRAHH   |
| P55067 | SSMQATKHPI SGPWASLDSSNVTVNPVPSDAGILGTESGVL  |
| P55067 | EDPTDPCENNPCLHGTCRTNGTMYGCSDDQGYAGENCEID    |
| P55067 | NLPYVCKKGTVLCGPPPAVENASLVGRKVKYNVHATVRYQ    |
| Q6PIU2 | KYWVDYFKGNVDFVQAMIVNNHTSLDVEEAAAVRARLNWTS   |
| Q6PIU2 | IVNNHTSLDVEEAAAVRARLNWTSLLPASFTKNYKPVVQTT   |
| O00533 | GDLPKGRETKENYGT LKIENVS YQDKGNRYCTASNFLGTA  |
| O00533 | SWQKVEEVKPLEGRRYHIYENGT LQINRTTEEDAGSYSCWV  |
| O00533 | EVKPLEGRRYHIYENGT LQINRTTEEDAGSYSCWVENAIGK  |
| O00533 | SHLKHSLKLSWSKDG EAFEINGTEDGRI IIDGANLTISNVT |
| O00533 | EINGTEDGRI IIDGANLTISNVTLEDQGIYCCSAHTALDSA  |
| O00533 | YRVTKPQGAPVEWEEETV TNHTLRVMTPAVYAPYDVKVQA   |
| O00533 | LYSGEDYPTAPVIHGVDVINSTLVKVTWSTVPKDRVHGRL    |
| O00533 | IKVDKDTATLSWGLPKKLNGLTG YLLQYQIINDTYEIGEL   |
| O00533 | TEESSTLGEKSGKIGKISGVNLTQKTHPIEVFEPGAEHIVR   |
| Q9UI40 | NDKILDYTFQPPLSKEGESENSTHQAQGDYPKDIFSLEERR   |
| P29120 | QKGITGKGVVITVLD DGLEWNHTDIYANYDPEASYDFNDND  |
| P29120 | TSASAPLAAGIFALALEANPNLTWRDMQHLVVWTSEYDPLA   |
| Q94EG3 | DVCVADLHSHKVKVNGFPCKTNFTAADFSSLAISKPGATNNK  |
| Q6ZQE4 | KELEQFSIWNFFSSFLKEKLN DTYVNVGLYSTKTKLVEMI   |
| P97798 | FYFLVEPVDTL SVRGSSVILNCSAYSESPNIEWKKDGTFL   |
| P97798 | QPLLLDDRIVKLP SGTLVISNATEGDGGLYRCIVESGGPPK  |
| P97798 | EISDVTEDDAGTYFCIADNGNKTVEAQAELTVQVPPGF LKQ  |
| P97798 | VSTRFIKLTWRTPASDPHGDNLTYSVFYTKEGVDRERVENT   |
| P97798 | DNLTYSVFYTKEGVDRERVENTSQPGEMQVTIQNLMPATVY   |

|        |                                              |
|--------|----------------------------------------------|
| P97798 | VSTQDVAVRTLSDVPSAAPQNLSLEVRNSKSIIVHWPSS      |
| P97798 | LIEGLDRGTEYNFRVAALTVNGTGPATDWLSAETFESDLDE    |
| P97798 | RYYTVRWKTNIPANTKYKNANATLSYLVTGLKPNTLYEFS     |
| Q92859 | FYFLVEPVDTL SVRGSSVILNCSAYSEPSKIEWKKGDTFL    |
| Q92859 | QPLLLDDRVIKLP SGMVLVISNATEGGGLYRCVVE SGGPPK  |
| Q92859 | EISDVTEDDAGTYFCIADNGNETIEAQELTVQAQPEFLKQ     |
| Q92859 | VSTRFIKLTWRTPASDPHGDNLTVSVFYTKEGIARERVENT    |
| Q92859 | DNLTVSVFYTKEGIARERVENTSHPGEMQVTIQNLMPATVY    |
| Q92859 | VSTPDVAVRTLSDVPSAAPQNLSLEVRNSKSIIMHWPAP      |
| Q92859 | LIEGLDRGTEYNFRVAALTINGTGPATDWLSAETFESDLDE    |
| Q92859 | RYYTVRWKTNIPANTKYKNANATLSYLVTGLKPNTLYEFS     |
| Q18673 | LILCGTVDALPRAPYFNDDINKTTTTSEDKTVGNTVVEEEK    |
| Q18673 | YTVGDSEGYQEASRLQLKSLNLSLDPCCDDFFEYACRAWVDS   |
| Q18673 | SQFTATREKVLAE MRKLYEDNTS IPTSKSIALIKQIYNTCM  |
| Q18673 | TIQSRDVS VFFDFGPAEDSRNVSRLLSFDQGS LGLYSTR    |
| Q18673 | YRKYTI GKVRYYTEDAGMAVNESKIESDVDEI IAFEKEWAQ  |
| Q18673 | EI IAFEKEWAQILVAEEDRRNYTKLYNVRFRDDLKEYMSII   |
| Q18673 | KLSYASGSMYVRKYFDANAKNTLDMITDLQEA FRNMHMAN    |
| Q18673 | GFDDTGRQFDNVGNLRDWDNTTSKFNERTQCI IEQYADV     |
| P08473 | PKTEDIVAVQKAKALYRSCINESAIDSRGGEP LLLKLLPDIY  |
| P08473 | DENQLALEMNKVMELEKEIANATAKPEDRNDPMLLYNKMTL    |
| P08473 | LAQIQNNFSLEINGKPF S WLNFTNEIMSTVNI SITNEEDVV |
| P08473 | TQQSASNFKEQSQCMVYQYGNFSWDLAGGQH LNGINTLGEN   |
| Q61391 | PKTEDIVAVQKAKTLYRSCINESAIDSRGGQP LLLKLLPDIY  |
| Q61391 | LNSKYGKKVLINFFVGTDDKNSTQHI IHFDQPRLGLPSRDY   |
| Q61391 | DENQLSLEMNKVMELEKEIANATTKPEDRNDPMLLYNKMTL    |
| Q61391 | EDRNDPMLLYNKMTLAKLQNNFSLEVNGKSF SWSNFTNEIM   |
| Q61391 | MLLYNKMTLAKLQNNFSLEVNGKSF SWSNFTNEIMSTVNIN   |
| Q61391 | LAKLQNNFSLEVNGKSF SWSNFTNEIMSTVNI NIQNEEEVV  |
| Q61391 | TQQSANNFKDQSQCMVYQYGNFSWDLAGGQH LNGINTLGEN   |
| P07861 | PKTEDIVAVQKAKTLYRSCINESAIDSRGGQP LLLKLLPDIY  |
| P07861 | LNSKYGKKVLINFFVGTDDKNSTQHI IHFDQPRLGLPSRDY   |
| P07861 | DENQLSLEMNKVMELEKEIANATTKPEDRNDPMLLYNKMTL    |
| P07861 | EDRNDPMLLYNKMTLAKLQNNFSLEINGKPF SWSNFTNEIM   |
| P07861 | LAKLQNNFSLEINGKPF SWSNFTNEIMSTVNI NIQNEEEVV  |
| P07861 | TQQSANNFKDQSQCMVYQYGNFTWDLAGGQH LNGINTLGEN   |
| P08049 | PKTEDIVAVQKAKTLYRSCVNETAIDSRGGQP LLLKLLPDVY  |
| P08049 | DENQISVEMNKVMELEKEIANATTKSEDRNDPMLLYNKMTL    |
| P08049 | EDRNDPMLLYNKMTLAKLQNNFSLEINGKPF SWSNFTNEIM   |
| P08049 | LAQIQNNFSLEINGKPF SWSNFTNEIMSTVNI NI PNEEDVV |
| P08049 | TQQSANNFKEQSQCMVYQYGNFSWDLAGGQH LNGINTLGEN   |

|        |                                             |
|--------|---------------------------------------------|
| P10769 | VIEPECREEFHRPVRAGDRSNVTQLDGPAGALLRLMQLAG    |
| P01180 | EPECREGVGFPRRVRANDRSNATLLDGPAGALLRLVQLAG    |
| P01185 | VTEPECREGFHRRARASDRSNATQLDGPAGALLRLVQLAG    |
| P01181 | EPECREGIGFPRRVXASDRSNATLLDGPAGALLRLVQLAA    |
| P01183 | EPECREGASFLRRARASDRSNATLLDGPAGALLRLVQLAG    |
| P01186 | VAEPECREGFFRLTRAREQSNATQLDGPARELLRLVQLAG    |
| Q99519 | VASTMLVWSKDDGVSWSTPRNLSLDIGTEVFAPGPGSGIQK   |
| Q99519 | VVTSSGIVFFSNPAHPEFRVNLTLRWSFNGTSWRKETVQL    |
| Q99519 | FSNPAHPEFRVNLTLRWSFNGTSWRKETVQLWPGPSGYSS    |
| O94856 | GDLPSDKAKFENFNKALRITNVSEEDSGEYFCLASNKMGS I  |
| O94856 | AGDTII FRDTQISSRAVYQCNTSNEHGYLLANAFVSVLDVP  |
| O94856 | LDVPPRMLSPRNQLIRVILYNRTRLDCCPFFGSP IPTLRWFK |
| O94856 | RWFKNGQGSNLDGGNYHVYENGSL EIKMIRKEDQGIYTCVA  |
| O94856 | GDVKGEGTRKNNMEITWTPMNATS AFGPNLRYIVKWRRET   |
| O94856 | GNLRYIVKWRRETREAWNNTVWGSRYVVGQTPVYVPYE      |
| O94856 | DHPEHPNGIMIGYTLKYVAFNGTKVGKQIVENFSPNQKFT    |
| O94856 | KYVAFNGTKVGKQIVENFSPNQKFTVQRTDPVSRYRFTLS    |
| P11672 | VQKKEGFTMYSTIYELQENNSYNVTSILVRDQDQGCYRW     |
| P11672 | TEGFTMYSTIYELQENNSYNVTSILVRDQDQGCYRWIRTF    |
| P80188 | DKDPQKMYAT IYELKEDKSYNVTSVLFRRKKCDYWIRTFVP  |
| Q96E22 | CMAVGISYISVYDHQGIFKRNN SRLMDEILKQQQELLGLDC  |
| Q96E22 | LGFLPWHIRL TEIVSLPSHLNISYEDFFSALRQYAAEQRL   |
| Q04121 | FVNWIYRVKTI RMSGITGENISVPDEI PYNQMMTFWAGL   |
| Q04121 | EEDTSDEDFDIEAPRAINLLNGSSIQTDLGPYSDNNSPDIS   |
| Q04121 | NSPDISIDQFAVSSNKNL PNNISTTGGNTFGGLNETENTSP  |
| Q04121 | SNKNLPNNISTTGGNTFGGLNETENTSPNPARSSMDKRNLR   |
| Q23316 | SDQVFRTLFI GEGNACYRTFNKTHEFGCQANRENENGLIVR  |
| Q23316 | AITRDGLMKI DWRIQMVFIDNSTDLEIEKCYSMFNPKED    |
| Q23316 | GAMHSDNIFAFPTPIPTSP TNETIITSKYMMVTARMD SFGM |
| Q23316 | SVLAAARSMGTQIEKWQKASNTSNRN VFFAFFNGESLDYIG  |
| Q23316 | IGVAKGRKYVHVVDGERYQ QNKQTDRVIDRIERGLRSHAF   |
| Q23316 | GQFQAFQMYTYTWQPNPYTGNF SCLKSAIVKVMVSPAVDS   |
| P57716 | VVLAGLCGGNSVERKIYI PLNKTA PCVRLLNATHQIGCQSS |
| P57716 | SVERKIYIPLNKTA PCVRLLNATHQIGCQSSISGDTGVIHV  |
| P57716 | EKLKGTTSRIAGLAVTLAKPNST SFSVQCPNDGFGIYS     |
| P57716 | LGNGLAYEDFSFPIF LLEDENETKVIKQCYQDHNLGQNGSA  |
| P57716 | EDENETKVIKQCYQDHNLGQNGSAPS FPLCAMQLFSHMHAV  |
| P57716 | PEIVCDPLSDYNVWSMLKPINT SVGLEPDVVRVVAATRLDS  |
| P57716 | QVALRTSLDLWMHTDPMSQKNE SVKNQVEDLLATLEKSGAG  |
| P57716 | RLAQSQALPPSSLQRFLRARNISGVVLADHSGSFHNRYYQS   |
| P57716 | HSGSFHNRYYQSIYDTAENINVTY PEWQSPPEEDLNFVTDTA |

|        |                                              |
|--------|----------------------------------------------|
| P57716 | ALANVATVLARALYELAGGTNFSSSIQADPQTVTRLLYGFL    |
| P57716 | SIQADPQTVTRLLYGFLVRANNSWFQSI LKHDLRSYLDDRP   |
| P57716 | IQADPQTVTRLLYGFLVRANNSWFQSI LKHDLRSYLDDRPL   |
| P57716 | LSYLLDDRPLQHYIAVSSPTNTTYVVQYALANLTGKATNLT    |
| P57716 | HYIAVSSPTNTTYVVQYALANLTGKATNLTREQCQDPSKVP    |
| P57716 | PTNTTYVVQYALANLTGKATNLTREQCQDPSKVPNESKDLY    |
| P57716 | LTGKATNLTREQCQDPSKVPNESKDLYEYSWVQGPWNSNRT    |
| P57716 | VPNESKDLYEYSWVQGPWNSNRTERLPQCVRSTVRLARALS    |
| Q92542 | VLLAGLCRGNVERKIYIPLNKTA PCVRLLNATHQIGCQSS    |
| Q92542 | SVERKIYIPLNKTA PCVRLLNATHQIGCQSSISGDTGVIHV   |
| Q92542 | LGNGLAYEDFSFPIF LLEDENETKVIKQCYQDHNLSQNGSA   |
| Q92542 | IFLLEDENETKVIKQCYQDHNLSQNGSAPTFFLCAMQLFSH    |
| Q92542 | EDENETKVIKQCYQDHNLSQNGSAPTFFLCAMQLFSHMHAV    |
| Q92542 | PEIVCDPLSDYNVWSMLKPINTGTLKPD DRVVVAATRLDS    |
| Q92542 | QVALRTSLELWMHTDPVSQKNE SVRNQVEDLLATLEKSGAG   |
| Q92542 | LLATLEKSGAGVPAVILRRPNQSQPLPPSSLQRFLRARNIS    |
| Q92542 | RPNQSQPLPPSSLQRFLRARNISGVVLADHSGAFHNKYQS     |
| Q92542 | HSGAFHNKYQSIYDTAENINVSYPEWLSPEEDLN FVTDTA    |
| Q92542 | ALADVATVLGRALYELAGGTNFSDTVQADPQTVTRLLYGFL    |
| Q92542 | TVQADPQTVTRLLYGFLIKANN SWFQSI LRQDLRSYLG DGP |
| Q92542 | LSYLG DGPLQHYIAVSSPTNTTYVVQYALANLTGTVVNLT    |
| Q92542 | HYIAVSSPTNTTYVVQYALANLTGTVVNLTREQCQDPSKVP    |
| Q92542 | PTNTTYVVQYALANLTGTVVNLTREQCQDPSKVPSENKDLY    |
| Q92542 | VPSENKDLYEYSWVQGPLHSNETDRLPRCVRSTARLARALS    |
| P10493 | SSSPAEEGKRNTFQAVLASSNSSSYAIFLYPEDGLQFFTF     |
| P10493 | CSVHAECDYATGFCRCRVANYTGNGRQCVAEGSPQRVNGK     |
| Q14112 | PEVDRDSLAPSWETPPPYFENGSIQPYPDGGFVPSEMDVPP    |
| Q14112 | PENYLSIKTNIQGGQVPYVSANFTAHSYKELYHYS DSTVT    |
| Q14112 | SDSTVTSTSSRDYSLTFGAINQTWSYRIHQNITYQVCRHAP    |
| Q14112 | RDYSLTFGAINQTWSYRIHQNITYQVCRHAPRHPSPPTQQ     |
| Q14112 | PSVGTFLLYTQGGQIGYLP LNGLTRQKDAAKTLLSLHGSII   |
| O88322 | PENYLSIKTNI EGQVPFI PANFTAHTPYKEFYHYRDSVVT   |
| O88322 | RDSVVTSSSRFSLSLTSGSINQTWSYHIDQNITYQACRHAP    |
| O88322 | RSFSLTSGSINQTWSYHIDQNITYQACRHAPRHLAIPATQQ    |
| O88322 | PSVGTFLLYAQGGQIGHLPLNGSRLQKDAARTLLSLHGSIV    |
| Q9XTG1 | LPVMVIVHGEEYGWGTGNFNGTTLAAYGHII VVTLN YRLG   |
| Q9XTG1 | SQNPQQYFMQLAEELACAPKNRTSSFN DNVDTIVRCMQVHS   |
| Q9XTG1 | SSFNDNVDTIVRCMQVHSENI TKAVLKIDVPTFLSGFAPI    |
| Q99K10 | PTGEHRFQPEPPSPWSDIRNATQFAPVCPQNIIDGRLPEV     |
| Q99K10 | GGSCVNLLTSHYSEGNRWSNSTKGLFQRAIAQSGTALSSW     |
| Q99K10 | WAVSFQPAKYARILATKVGCVSDTVLVECLQKKPYKELV      |



|        |                                             |
|--------|---------------------------------------------|
| Q99K10 | DEVYVVLGIPMIGPTELFPCNFASKNDVMSAVVMTYWTNFA   |
| Q8N0W4 | PTGERRFQPPEPPSSWTGIRNTTQFAAVCPQHLDERSLLHD   |
| Q8N0W4 | DEVYVFGIPMIGPTELFSCNFASKNDVMSAVVMTYWTNFA    |
| Q62765 | PTGEHRFQPPEPPSPWSDIRNATQFAPVCPQNIIDGRLPEV   |
| Q62765 | GGSCVNLLTSLSHYSEGNRWSNSTKGLFQRAIAQSGTALSSW  |
| Q62765 | WAVSFQPAKYARILATKVGCVSDTVELVECLQKKPKYKELV   |
| Q62765 | DEVYVVLGIPMIGPTELFPCNFASKNDVMSAVVMTYWTNFA   |
| Q69ZK9 | PLGARRFQPPEAPASWPGVRNATTLPPACPQNLHGALPAIM   |
| Q69ZK9 | AIMLPVWFDTNLEAAATYVQNQSEDCLYLNLYVPTEDGPLT   |
| Q69ZK9 | DELPLYVFGVPMVGATDLFPCNFASKNDVMSAVVMTYWTNFA  |
| Q24418 | YLMYASTEDAQVIFRDAGEYNTGEGHVWIVTEQALFSNNT    |
| Q24418 | KGHIRDSVYVLSAIAKEMISNETIAEAPKDCGDSAVNWESG   |
| Q24418 | GDSAVNWESGKRLFQYLKSRNITGETGQVAFDDNGDRIYAG   |
| Q24418 | KHVVGKFSYDSMRKMRMRINDSEI IWPGKQRRKPEGIMIP   |
| Q24418 | RRMGDDEFRCPEPDERPCPLFNNSDATANEFCCRGYCIDLLI  |
| Q24418 | NEFCCRGYCIDLLIELSKRINFYDLALSPDGQFGHYILRN    |
| Q24418 | NFTYDLALSPDGQFGHYILRNNTGAMTLRKEWTGLIGELVN   |
| Q24418 | ERPKTCLSGINDARLRNTMENLTCATVKGSSVDMYFRRQVE   |
| Q00960 | HEKDDFHLSVVPVELVAMNETDKPSIITRICDLMSDRKI     |
| Q00960 | CYNTEKRIYQSNMLNRYLINVTFEGRNLSFSEDGYQMHPK    |
| Q00960 | RIYQSNMLNRYLINVTFEGRNLSFSEDGYQMHPKLVII LLN  |
| Q00960 | PLSGTCMRNTVPCQKRIISENKTDEEPGYIKKCKGFCIDI    |
| Q00960 | SVKFTYDLYLVNKGKHKINGTWNMGIEVVMKRAYMAVG      |
| Q00960 | VVDFSVPFIEGTGISVMVRSRNGTVSPSAFLEPFSADVWMM   |
| Q00960 | DKKFQRPNDPSPFRFGTVPNGSTERNIRNNYAEMHAYMGK    |
| Q8IW45 | GPMSDDSHGSLVRLSQAALGNVTVVQKGERDILSNGQQVLV   |
| Q8IW45 | LSGSLGVLVH WALLAGPQKTNGSSPLLVAAFGACSLTRQCN  |
| Q99784 | STMAMITNWSQTLPSLVGLNNTKLSAAGGTLDRSTGVLP     |
| Q99784 | TMCSR DARTKQLRQ LLEKVNMSQSIEVLD RRTQRDLQYVE |
| Q99784 | VLEEKADAKLVLFKKEEVQNLTSLNELQEEIGAYDYDEL     |
| Q99784 | YHNNRFVREYKSMVDFMNTDNFTSHR LPHPWSGTQVVYNG   |
| Q99784 | DNFTSHR LPHPWSGTQVVYNGSIYFNKFQSHIIRFDLKT    |
| Q99784 | AGNIVSR LDPVSLQTLQ TWNTSYPKRSAGEAFIICGTLVY  |
| Q99784 | TLYVTNGYSGGTKVHYAYQTNASTYEYIDIPFQNKYSHISM   |
| Q88998 | STMAMITNWSQTLPSLVGLNNTKLSAAGGTLDRSTGVLP     |
| Q88998 | TMCSR DARTKQLRQ LLEKVNMSQSIEVLD RRTQRDLQYVE |
| Q88998 | VLEEKADAKLVLFKKEEVQNLTSLNELQEEIGAYDYDEL     |
| Q88998 | YHNNRFVREYKSMVDFMNTDNFTSHR LPHPWSGTQVVYNG   |
| Q88998 | DNFTSHR LPHPWSGTQVVYNGSIYFNKFQSHIIRFDLKT    |
| Q88998 | AGNIVSK LDPVSLQILQ TWNTSYPKRSAGEAFIICGTLVY  |
| Q88998 | TLYVTNGYSGGTKVHYAYQTNASTYEYIDIPFQNKYSHISM   |

|        |                                             |
|--------|---------------------------------------------|
| Q15155 | HGSEDIVVCGGFFVKSDVEINYSLIEIKLYTKHGTLKYQTD   |
| Q15155 | TVRVTSNANAASPLIVAGYNVSGSVRSDEGPEMKGVKFLLF   |
| Q15155 | HAITLEFYQDNGRENVGIYNLSKGVNRFCLSKPGVYKVTP    |
| P46531 | GPRCSQPGETCLNGKCEAANGTEACVCGGAFVGPQCQDPN    |
| P46531 | GTFCEEDINECASDPCRNGANCTDCVDSYTCPCPAGFSGIH   |
| P46531 | TCTDYLGGYSCKCVAGYHGVNCSEIIDECLSHPCQNGGTCL   |
| P46531 | NVDDCNPPVDPVSRSPKCFNNGTCVDQVGGYSCTCPPGFVVG  |
| P46531 | NHACGWDGGDCSLNFNDPWKNCTQSLQCWKYFSDGHCDSDQC  |
| P46531 | ERLAAGTLVVVVLMPPEQLRNSSFHFLRELSRVLHTNVVFK   |
| Q01705 | VDINECVKSPCRHGASCQNTNGSYRCLCQAGYTGRNCESDI   |
| Q01705 | GAFCEEDINECASNPCQNGANCTDCVDSYTCPCPVGFNGIH   |
| Q01705 | TCTDYLGGFSCCKCVAGYHGSNCSEIINECLSQPCQNGGTCTI |
| Q01705 | NVDDCHPPLDPASRSPKCFNNGTCVDQVGGYTCTCPPGFVVG  |
| Q01705 | NHACGWDGGDCSLNFNDPWKNCTQSLQCWKYFSDGHCDSDQC  |
| Q01705 | ERLAAGTLVVLVLLPPDQLRNNFHFHFLRELSHVLHTNVVFK  |
| O35516 | LQCRGGQEPVNEGTCVTYHNGTGFCRCPEGFLGEYCQHRD    |
| O35516 | VGFTGKQCQWTDACLSHPCENGSTCTSVASQFSCKCPAGLT   |
| O35516 | HHPCYSQVNECLSNPCIHGNCTGGLSGYKCLCDAGWVGVN    |
| O35516 | KARPHCLCPPGWDGAYCDVLNVSCAAALQKGVVVEHLCQH    |
| O35516 | SHACQWDGGDCSLTMEDPWANCTSTLRCWEYINNQCDEQCN   |
| Q9VUX3 | MHSASGSGDHSRSLKRANLANTSI TCNDGSHAGFYLRKHPS  |
| Q9VUX3 | TPQQWNYIHEMGGALRSSLDNVSAVFAPSCIGHGVLFKRDW   |
| Q9VUX3 | QPAAGVLEASAPQKTRSSNNASAGTKSKKRHRVPRVPEKC    |
| Q9VUX3 | PRVPEKCGRLRLERCSPQCNSHSCPTLTNPMTGEMRFLEL    |
| Q9Y588 | SSLSHDEKKGGSWLNPIQSRNTTVEYVTFSTIAGLTGVIMT   |
| Q9Y588 | LGLGIHGIGGIVRGQTEESMNEHPRKCAESFEMWDDRDSH    |
| Q19127 | CIMRGLCQKHTENAYGPCVTNDTNVEPTAFDKTHPAYEKMV   |
| Q19127 | FLLYDP IKTPPSDRSTYMNVNFTGCDKSARVGPACSTSEC   |
| Q19127 | GPVFKHDI FEELFDILNAIKNI STQDSGRTITLDDVCYRP  |
| Q19127 | GLSCMGTYGGPSAPNMVFGKNS TNHQAANSIMMTILVTQRT  |
| Q19127 | KSPCCKVYVHDPNTFCSTNRNKSALDDKACRTCMDFDYVAN   |
| Q19127 | SRGRIQASQFMTFHKKLS ISNSDFIKAMDTARMVSRRLER   |
| O15118 | PLPKDGYDLVQELCPGFFFGNVSLCCDVRQLQTLKDNLQLP   |
| O15118 | YNLLNLFCELTCSPRQSQFLNVTATEDYVDPVTNQTKTNVK   |
| O15118 | PRQSQFLNVTATEDYVDPVTNQTKTNVKELQYYVGSFANA    |
| O15118 | KTNVKELQYYVGSFANAMYNACRDVEAPSSNDKALGLLCG    |
| O15118 | APSSNDKALGLLCGKDADACNATNWIEMFNKDNGQAPFTI    |
| O15118 | PFTTIPVFSDFPVHGMEMNATKGCDESVDEVTAPCSCQD     |
| O15118 | GPPLDIQILHQVLDLQIAIENITASYDNETVTLQDICIAPL   |
| O15118 | ILHQVLDLQIAIENITASYDNETVTLQDICIAPLSPYNTNC   |
| O15118 | DNETVTLQDICIAPLSPYNTNCTILSVLNYFQNSHSHVLDHK  |

|        |                                            |
|--------|--------------------------------------------|
| 015118 | FVYADYHTHFLYCVRAPASLNDTSLLDHDPCLGTFGGPVFPW |
| 015118 | SWIDDYFDWVKPQSSCCRVNDITDQFCNASVVDPAVCRCP   |
| 015118 | DWVKPQSSCCRVNDITDQFCNASVVDPAVCRPLTPEGKQ    |
| 015118 | VLQTSADFIDALKKARLIASNVTEMTGINGSAYRVFPYSVF  |
| 015118 | IDALKKARLIASNVTEMTGINGSAYRVFPYSVFYFYEQYL   |
| P61916 | NVSPCPTQPCQLSKGQSYSVNVFTFSNIQSKSSKAVVHGIL  |
| Q9UHC9 | AFYDECGKNPELSGSLMTLSNVSCLSNTPARKITGDHLILL  |
| Q9UHC9 | RCPACSDNFVNLHCHNTCSPNQSLFINVTRVAQLGAGQLPA  |
| Q9UHC9 | DNFVNLHCHNTCSPNQSLFINVTRVAQLGAGQLPAVVAYEA  |
| Q9UHC9 | EPGQAVGSGIQPLNEGVARCNESEQDDVATCSCQDCAASCP  |
| Q9UHC9 | FHDQHFGPFFRTNQVILTAPNRSSYRYDSSLGPKNFSGIL   |
| Q9UHC9 | ILTAPNRSSYRYDSSLGPKNFSGILDLDLLELLELQERL    |
| Q9UHC9 | LLELQERLRHLQVWSPEAQRNISLQDICYAPLNPDNTSLYD  |
| Q9UHC9 | PEAQRNISLQDICYAPLNPDNTSLYDCCINSLQYFQNNRT   |
| Q9UHC9 | PDNTSLYDCCINSLQYFQNNRTLLLLTANQTLMGQTSQVD   |
| Q9UHC9 | CINSLQYFQNNRTLLLLTANQTLMGQTSQVDWKDHFYCA    |
| Q9UHC9 | RMAGMFQVTFMAERSLEDEINRTAEDLPIFATSYIVIFLY   |
| Q22523 | VLDGYKTFDGRPIYPLPFENSSVAVDRSAKNHNDVVCTSR   |
| Q22523 | EGDKWQEWSHSWEEQIALVNLGTVNAVILEMAVTHDPSNS   |
| Q22523 | LNLTGVNAVILEMAVTHDPSNSRSVIELDQPKWGAGSRYP   |
| Q22523 | KWGAGSRYPYLSGANDPMLRNYTTLMKMTAVALGADPAIAE  |
| Q22523 | DPAIAEKEMNEAMEFELKLVNFSADDMVRRDPERGNRFEL   |
| Q22523 | FINFKEYLKTVFKELVALS PNHTVIVREIDYFVGIQHVLS  |
| Q22523 | QGFS PFLPPSAREPFYQFKANQTGMFNSPPPDRWEDCVTLS |
| Q22523 | RAISKANMIEYKSGFPMVLFNDTWMEKNWGMIIKPREYLLH  |
| Q22523 | NIADNGGVKTAFNAYKAWKSNTTGISEPALPGFQNFQSQM   |
| Q22523 | YKAWKSNTTGISEPALPGFQNFQSQMFFLAYANNWCSLVR   |
| 016796 | PEVCS TPGCVRAATHFLNAMNTSVDPCCDFEFACGQWNDQ  |
| 016796 | EVVTESESINMARATYRSCMNKTQDELMTGPLFETLTELG   |
| 016796 | TLTELGEWELLQENWDKTKFNFTSLLVNSRRDYGVDFVFFQL |
| 016796 | SRRDYGVDFVFFQLYIYADSKNTRNTLFDQSTLALGRGTR   |
| 016796 | TLFDQSTLALGRGTRDYLYLNTLFSHMTAYRKYLRQIAH    |
| 016796 | HMTAYRKYLRQIAHLLKTDGNLTRSESEMNDIEKIIDFEI   |
| 016796 | KIIDFEIELAKIIVAEDERRNNTRLYNKRQIQDLYNLLPQV  |
| 016796 | VDWVFFQSIAPSDLTHLFHNETEIIICEIEYLQHVSELIE   |
| 016796 | SESSLNSFDTRRRRIVEQYGNVTVPKTNFRVNGKLTQGENI  |
| Q9Y639 | VTSEEVIIIRDSPVLPVTLQCNTSSSHTLTYSYWTKNGVEL  |
| Q9Y639 | HTLTYSYWTKNGVELSATRKNASNMEYRINKPRAEDSGEYH  |
| Q9Y639 | RAEDSGEYHCYVHFVSAPKANATIEVKAAPDITGHKRSENK  |
| Q9Y639 | YPHPDWIWRKKENGMPMDIVNTSGRFFIINKENYTELNIVN  |
| Q9Y639 | NGMPMDIVNTSGRFFIINKENYTELNIVNLQITEDPGEYEC  |

|        |                                                 |
|--------|-------------------------------------------------|
| Q9Y639 | YTELNI VNLQITEDPGEYECNATNAIGSASVVTVLRVRS HL     |
| P97300 | IVTSEEVI IRESLLPVTLQC NLTS S SHTLMYSYWTRNGVEL   |
| P97300 | TLQC NLTS S SHTLMYSYWTRNGVELTATRKNASNMEYRINK    |
| P97300 | HTLMYSYWTRNGVELTATRKNASNMEYRINKPRAEDSGEYH       |
| P97300 | MYSYWTRNGVELTATRKNASNMEYRINKPRAEDSGEYHCVY       |
| P97300 | RAEDSGEYHCVYHFVSAPKANATIEVKAAPDITGHKRSENK       |
| P97300 | MMYCKSVGYPHPEWIWRKKENGVFEEISNSSGRFFITNKEN       |
| P97300 | YPHPEWIWRKKENGVFEEISNSSGRFFITNKENYTELSIVN       |
| P97300 | NGVFEEISNSSGRFFITNKENYTELSIVNLQITEDPGEYEC       |
| P97300 | YTELSIVNLQITEDPGEYECNATNSIGSASVSTVLRVRS HL      |
| P97546 | IVTSEEVI IRDSL LPVTLQC NLTS S SHTLMYSYWT KNGVEL |
| P97546 | HTLMYSYWT KNGVELTATRKNASNMEYRINKPRAEDSGEYH      |
| P97546 | RAEDSGEYHCVYHFVSAPKANATIEVKAAPDITGHKRSENK       |
| P97546 | YPHPEMMWRKKENGVFEEISNSSGRFFIINKENYTELNI V N     |
| P97546 | NGVFEEISNSSGRFFIINKENYTELNI VNLQITEDPGEYEC      |
| P97546 | YTELNI VNLQITEDPGEYECNATNSIGSASVSTVLRVRS HL     |
| Q68D85 | EGDLKVE MMAGGTQITPLNDNVTIFCNI FYSQPLNITSMGI     |
| Q68D85 | ITPLNDNVTIFCNI FYSQPLNITSMGITWFKSLTFDKEVK       |
| Q68D85 | MKENEDKYMCESSGFYPEAINI TWEKQTQKFPHPHIEISEDV     |
| Q68D85 | IEISEDVITGPTIKNMDGTFNVTSC LKLNSSQEDPGTVYQC      |
| Q68D85 | TGPTIKNMDGTFNVTSC LKLNSSQEDPGTVYQCVVRHASLH      |
| Q68D85 | PGTVYQCVVRHASLHTPLRSNFTLTAARHSLSETEKTDNFS       |
| Q68D85 | RSNFTLTAARHSLSETEKTDNFSIHWWPISF IGVGLVLLIV      |
| Q8CJ26 | QQQDGDREGMWWGAGGALAPNTSSLFPEPPGASSNIIPVY        |
| Q9IGQ6 | NISNTNVVAGQDATSVILTGNSSLCPI SGWAIYSKDNGIRI      |
| Q9IGQ6 | HLECRTFFLTQGALLNDKHSNGTVKDRSPYRTLMSCPVGEA       |
| Q9IGQ6 | TIKSWRNNILRTQESECACVNGSCFTIMTDGPSNGQASYKI       |
| Q6XV27 | LNIGLHYKVGDTPNVNI PNVNGTNS TTTI INNNTQNNFTNI    |
| Q6XV27 | GLHYKVGDTPNVNI PNVNGTNS TTTI INNNTQNNFTNITNI    |
| Q6XV27 | TPNVNI PNVNGTNS TTTI INNNTQNNFTNITNIIQSKGGER    |
| Q6XV27 | IPNVNGTNS TTTI INNNTQNNFTNITNIIQSKGGERTFLNL     |
| Q6XV27 | VNGTNS TTTI INNNTQNNFTNITNIIQSKGGERTFLNLTKP     |
| Q6XV27 | NNFTNITNIIQSKGGERTFLNLTKPLCEVNSWHILSKDNAI       |
| Q6XV27 | PQGCRMFALSQGTTLRGRHANGTIHDRSPFRALISWEMGQA       |
| Q6XV27 | STSDHGM SRMSICMSGPNNNASAVVWYGGRPITEIPSWAG       |
| Q6XV27 | NAETDIQSGPISNQVIVNNQNSGYSGAFIDYWANKECFNP        |
| P06820 | ECDSPASNQVMPCEPII IERNITEIVYLNNTTIEKEICPKV      |
| P06820 | QVMPCEPII IERNITEIVYLNNTTIEKEICPKVVEYRNWSK      |
| P06820 | VMPCEPII IERNITEIVYLNNTTIEKEICPKVVEYRNWSKP      |
| P06820 | VYLNNTTIEKEICPKVVEYRNWSKPQCQITGFAPFSKDNSI       |
| P06820 | PVKCYQFALGQGTTLDNKHSNDTVHDRI PHRTLLMNELGVP      |

|        |                                               |
|--------|-----------------------------------------------|
| P06820 | SSSCHDGKAWLHVCITGDDKNATASFYIDGRLVDSIGSWSQ     |
| P06820 | SIGSWSQNILRTQESECVINGTCTVVMTDGSASGRADTRI      |
| P03472 | CSHSQPEATNASQTIINNYNDTNITQISNTNIQVEERAIR      |
| P03472 | SQPEATNASQTIINNYNDTNITQISNTNIQVEERAIRDFN      |
| P03472 | ITQISNTNIQVEERAIRDFNNTKGLCTINSWHIYGKDNV       |
| P03472 | PDECRFYALSQGTTRGKHSNGTIHDRSQYRALISWPLSSP      |
| P03472 | STSCHDGKTRMSICISGPNNASAVIWNRRPVTEINTWAR       |
| P05803 | VLIGIVNLGLNIGLHLKPCNCSRSQPEATNASQTIINNY       |
| P05803 | NIGLHLKPCNCSRSQPEATNASQTIINNYNETNITQISN       |
| P05803 | CSRSQPEATNASQTIINNYNETNITQISNTNIQVEERASR      |
| P05803 | SQPEATNASQTIINNYNETNITQISNTNIQVEERASREFN      |
| P05803 | ITQISNTNIQVEERASREFNNTKGLCTINSWHIYGKDNV       |
| P05803 | PDECRFYALSQGTTRGKHSNGTIHDRSQYRDLISWPLSSP      |
| P05803 | STSCHDGRARMSICISGPNNASAVIWNRRPVTEINTWAR       |
| P27907 | DILLKFSSKITAPTMTLDCANASNVQAVNRSATKEMTFLLP     |
| P27907 | KITAPTMTLDCANASNVQAVNRSATKEMTFLLPPEWYPR       |
| P27907 | EIFPTGRVEHTEECTCGFASNKTIECACRDNSYAKRPFVK      |
| Q92823 | NIVIQCEAKGKPPPSFSWTRNGTHFDIDKDLVMTKPGTGT      |
| Q92823 | YFSNVLPEDTREDYICYARFNHTQTIQQKQPI SVKVISVDE    |
| Q92823 | TQTIQQKQPI SVKVISVDELNDTIAANLSDTEFYGAKSSRE    |
| Q92823 | KQPI SVKVISVDELNDTIAANLSDTEFYGAKSSRERPPTFL    |
| Q92823 | EFYGAKSSRERPPTFLTEGNASNKEELRGNVLSLECTAEG      |
| Q92823 | AEGLP TPI IYWAKEDGMLPKNRTVYKNFEKTLQI IHVSEAD  |
| Q92823 | DGDT I IFSNVQERSAVYQCNASNEYGYLLANAFVNVLAEP    |
| Q92823 | EWFKGAGSALHEDIYVLHENGTL EIPVAQKDSTGTYTCVA     |
| Q92823 | DHLVVADVSDDDSGTYTCVANTLDSVSASAVLSVVAPTPT      |
| Q92823 | HQTEVSGTQT TAQLKLSPVVNY SFRVMVNSIGKSLPSEAS    |
| Q92823 | YKVSWRQKDGDEWTSVVVANVSKYIVSGTPTFVPLYIKVQ      |
| Q92823 | GHSGEDLPMVAPGNVRVNVNSTLAEVHWDVPVPLKSIRGHL     |
| Q92823 | DPPSHPNGILTEYTLKYQPINSTHELGPLVDLKI PANKTRW    |
| Q92823 | YQPINSTHELGPLVDLKI PANKTRWTLKLNLFSTRYKFYFY    |
| Q92823 | GPLVDLKI PANKTRWTLKLNLFSTRYKFYFYAQT SAGSGSQ   |
| Q92823 | GILPDPVGAGKVQAVNPRISNL TAAAAETYANISWEYEGPE    |
| Q92823 | VQAVNPRISNL TAAAAETYANISWEYEGPEHVNFYVEYGVA    |
| Q92823 | NFYVEYGVAGSKEEWRKEIVNGSRSFGLKGLMPGTAYKVR      |
| Q09225 | YFGNMMSGPPDKHCYDKTVKNVTDGFCFALFPVLFKFGVCM     |
| P20241 | PSPTVNWMIQESIDGSIK SINSRMTLDPEGNLWFSNVTRE     |
| P20241 | IKSINSRMTLDPEGNLWFSNVTREDASSDFYYAC SATSVF     |
| P20241 | TDNTIRIINLVKGD TGNYG CNATNSLG YVYKDVYLVNQ AEP |
| P20241 | TIRIINLVKGD TGNYG CNATNSLG YVYKDVYLVNQ AEPPTI |
| P20241 | QAEPPTISEAPAAVSTVDGRNVTIKCRVNGSPKPLVKWLRA     |

|        |                                                |
|--------|------------------------------------------------|
| P20241 | IHWEEQQGDNRSPI LHYYTIQFN TSSFTPASWDAAYEKVPNTDS |
| P20241 | AYEKVPNTDSSFFVQMSPWANYTFRVIAFNKIGASPPSAHS      |
| P20241 | VAAEEVVGYSGEDRPLDAPTNTMRQITSSSTSGYMAWTFVS      |
| P20241 | TESATQEI DTNTVEGPI MVANETVANAGWFIGMMLALAFII    |
| O60462 | GAGFSLRYEIFKGTGSEDCSKNFTSPNGTIESPGFPEKYPHN     |
| O60462 | LRYEIFKGTGSEDCSKNFTSPNGTIESPGFPEKYPHNLDCTF     |
| O60462 | KSEETTPYPTEEEEATECGENCSFEDDKDLQLPSGFNCNFD      |
| O60462 | IHEREGYEDEIDDEYEVDSNSSSATSGSGAPSTDKEKSWL       |
| O14786 | HGAGFSIRYEIFKRGPECSQNYTTPSGVIKSPGFPEKYPNS      |
| O14786 | GILSMVFYTD SAIAKEGFSANYSVLQSSVSEDFKCMEALGM     |
| O14786 | GMESGEIHSDQITASSQYSTNWSAERSRLNYPENGWTPGED      |
| O14786 | GGKHRENKVFMRKFKIGYSNNGSDWKIMDDSKRKA SFEG       |
| O14786 | IKIDETGSTPGYEGEGEGDKNISRKPGNVLKTLDPILITII      |
| P97333 | HGAGFSIRYEIFKRGPECSQNYTAPTGVIKSPGFPEKYPNS      |
| P97333 | GVLSMVFYTD SAIAKEGFSANYSVLQSSISEDFKCMEALGM     |
| P97333 | GMESGEIHSDQITASSQYGTNWSVERSRLNYPENGWTPGED      |
| P97333 | GGKHRENKVFMRKFKIAYSNNGSDWKTIMDDSKRKA SFEG      |
| P97333 | IKIDETGSTPGYEGEGEGDKNISRKPGNVLKTLDPILITII      |
| Q28146 | TDTPVNDGAWHNVRIRRRQFRNTTLFIDQVEAKWVEVKSRR      |
| Q28146 | TLASVREREPFKGWIRDVRVNSLALPVDSEVVKLDDEFPN       |
| Q28146 | ELDAGRVLKLVNLD CIRINCNSKGPETLFAGYNLNDNEWH      |
| Q28146 | SNAIINDGKYHVVRFPTRSGGNATLQVDSWPVIERYPAGNND     |
| Q94887 | RISMRVELYGDYISENLYFNGTGLVRYDLRREPITSTKES       |
| Q94887 | NRELYLGGVPNVQEG LIVQQNFSGCLENIFYNSTNFIRVMK     |
| Q94887 | VQEG LIVQQNFSGCLENIFYNSTNFIRVMK DSTE LGEGYLF   |
| Q94887 | TFTTRSSFVRLKGYENSQLRNVSFYFRTYEETGVMLHHDY       |
| Q94887 | GSFEQSIMYDANQLQIEALLNRSHSCWQRLSYSCRSSRLFN      |
| Q94887 | GLYGISTGCVGRCESNPCLNNGTCIERYDGYSCDCRWSAFK      |
| Q94887 | NIRVGFTTTIPKGFLLGFSSNLTGEYLTIQISNSGHLRCVF      |
| Q94887 | DIKASADAQFNNIQYMYIGKNESMTDGFVGCVSRVQFDDIY      |
| Q96CW9 | GLATYWQSITWSRYPSPLEANITLSWNKTVELTDDVVMTFE      |
| Q96CW9 | QSITWSRYPSPLEANITLSWNKTVELTDDVVMTFEYGRPTV      |
| Q96CW9 | NLHANLCSMREGSLQCECEHNTTGPDCGKCKNFRTRSWRA       |
| Q96CW9 | SCKHNTRGQHCQHCRLGYRNGSAELDDENVCIECNCNQIG       |
| Q96CW9 | DENVCIECNCNQIGSVHDCNETGFCECREGAAGPKCDDCL       |
| P04629 | GLRCTRDGALDSLHHLPGAENLT ELYIENQQHLQHLELRDL     |
| P04629 | NQQHLQHLELRDLRGLGELRNLTIVKSGLRFVAPDAFHFTP      |
| P04629 | SGLRFVAPDAFHFTPRLSRLNLSFNALESLSWKTVOGLSLQ      |
| P04629 | GGVPEQKLCQCHGQGPLAHMPNASC GVPTLKVQVPNASVDVG    |
| P04629 | PLAHMPNASC GVPTLKVQVPNASVDVGDDVLLRCQVEGRGL     |
| P04629 | EQSATVMKSGGLPSLGLTLANVTS DLNRKNVTCWAENDVGR     |

|        |                                            |
|--------|--------------------------------------------|
| P04629 | GGLPSTLGLTLANVTSDLNRKNVTCWAENDVGRAEVSVQVNV |
| P04629 | KNVTCWAENDVGRAEVSVQVNVSPASVQLHTAVEMHHWCI   |
| P04629 | HWCIPFSVDGQFAPSLRWLFNGSVLNETSFIFTEFLEPAAN  |
| P04629 | FSDVGGQPAPSLRWLFNGSVLNETSFIFTEFLEPAANETVRH |
| P04629 | NGSVLNETSFIFTEFLEPAANETVRHGCLRLNQPTHVNNGN  |
| P04629 | NETVRHGCLRLNQPTHVNNGNYTLLAANPFGQASASIMAAF  |
| P04629 | NPFEFNPEDPIPVSFSPVDTNSTSGDPVEKKDETPFGVSVVA |
| Q16620 | DPSPGIVAFPRLEPNSVDFENITEIFIANQKRLEIINEDDV  |
| Q16620 | NQKRLEIINEDDVEAYVGLRNLTIIVDSGLKFVAHKAFKNS  |
| Q16620 | SGLKFVAHKAFKNSNLQHINFTRNKLTSLSRKHFRHLDLS   |
| Q16620 | WIKTLQEAKSSPDTQDLYCLNESSKNIPLANLQIPNCGLPS  |
| Q16620 | PLANLQIPNCGLPSANLAAPNLVVEEGKSITLSCSVAGDPV  |
| Q16620 | AGDPVPMYWDVGNLVSXHMNETSHTQGSRLITNISSDDSG   |
| Q16620 | NLVSXHMNETSHTQGSRLITNISSDDSGKQISCVAVENLVGE |
| Q16620 | SGKQISCVAVENLVGEDQDSVNLTVHFAPTITFLESPTSDDH |
| Q16620 | FTVKGNPKPALQWFYNGAILNESKYICTKIHVNTNHTYHGC  |
| Q16620 | FYNGAILNESKYICTKIHVNTNHTYHGCQLDNPTHMNGD    |
| Q16620 | YPDVIYEDYGTAAANDIGDTTNRNEIPSTDVTDKGTREHLS  |
| P81204 | VGFNRHYWAYLEGFMRDLTQNFDTVYVYTGPLFLPSAASTG  |
| P24289 | CNVDERDCGSSGCSISAIANYTQRVSDSSLSSENHAEALR   |
| P24289 | IGDMTQPLHDEAYAVGGNKINVTFDGYHDNLHSDWDTYMPQ  |
| P24289 | HALSDAESWAKTLVQNIESGNYTAQAIGWIKGDNISEPITT  |
| P24289 | VQNIESGNYTAQAIGWIKGDNISEPITTATRWASDANALVC  |
| P24504 | CNVDERDCGSSGCSISAIANYTQRVSDSSLSSENHAEALR   |
| P24504 | IGDMTQPLHDEAYAVGGNKINVTFDGYHDNLHSDWDTYMPQ  |
| P24504 | HALSDAESWAKTLVQNIESGNYTAQATGWIKGDNISEPITT  |
| P24504 | VQNIESGNYTAQATGWIKGDNISEPITTATRWASDANALVC  |
| P24021 | CGVDYDRDCGSAGCSISAIQNYTNILLESPPNGSEALNALKF |
| P24021 | AADANTYVCSTVLDGLAYINSTDLSEYDYKSKQPVFEELI   |
| F1NSM7 | CNTKHGFYIFQYIYSHLMQKNQTQVKKEEGDHQGTIHGHWL  |
| F1NSM7 | ISPDEVKIFIFGRANIQVGENSSVGSAGATSEANVIPTVV   |
| Q9U539 | GNPPHTCHIEGKEYLRPLTNDTQILSCKQYNETQINVFRA   |
| Q9U539 | GKEYLRPLTNDTQILSCKQYNETQINVFRFTSAPVDTYSD   |
| Q9U539 | VDYSDRISLVPCQNGWDYDNSTYLDLSLVTEFNLVCDQQAW  |
| Q8WR51 | FQCVSIQGDSTLKDLLKHSNFSESTSIMVDRAEITLHEHY   |
| Q9Y2G5 | QDKHEYYRQWFWGYEETRGLNVSVQGSASIVAPLLLRN     |
| Q9Y2G5 | NVSVQGSASIVAPLLLRNTSARSVMDRAENLLHDHYG      |
| Q9Y2G5 | SMVFARHLREVGDFFRSRHLNSTDDADRIPFQEDWMMKMKVK |
| Q9H488 | GRFGNQADHFLGSLAFKLLNRTLAVPPWIEYQHKKPPFTN   |
| Q9H488 | CPMKEGNPFGPFWDQFHVSNKSELFTEGTSFASYSREQWSQ  |
| Q8WWZ8 | AMPTFCIPENHCGTHAPVWLNKSHPLEGDIQVQRQACASFN  |

|        |                                            |
|--------|--------------------------------------------|
| Q8WWZ8 | GDGIVQRQACASFNGNCCLWNTTVEVKACPGGYVYRLTKP   |
| Q8WWZ8 | NAIEVNIIPRELVGGLFLTNTSCRGVSNQTHVNIILFSLKT  |
| Q8WWZ8 | RELVGGLFLTNTSCRGVSNQTHVNIILFSLKTCGTVVDDVV  |
| Q07081 | EMQKLEEQDIILDTYSEKIINLTRRVEYLEKLHPESLVEIS  |
| Q07081 | MRVKPNGNSVQVETLYNEVKNMSTVQLETLDKNNVLQAK    |
| Q07081 | QLNWKGNAYKSGAWGKDAAWNNTTKKSLYWVAPLNTDGRVLE |
| Q07081 | LQMYKNPIDLPLSMLIKNKLNNTFAGQGAGVVVHNNNLYYN  |
| Q07081 | VVGKVNVAFTVDNIWITTONKSDASNAFMICGVLYVTRSL   |
| P78380 | IMVLGMQLSQVSDLLTQEQLANTHQKKKLEGQISARQQAEE  |
| P78380 | EQMELHHQNLNLQETLKRVANCSAPCPQDWIWHGENCYLFS  |
| P41145 | IQIFRGEPTCAPSACLPPNSSAWFPGWAEFDSNGSAGSE    |
| P41145 | SACLPPNSSAWFPGWAEFDSNGSAGSEDAQLEPAHISPAIP  |
| P06002 | MSSIWCLAPAFGWSRYVPEGNLTS CGIDYLERDWNPRSYLI |
| Q9VNB5 | AWTTITFFGDSVKMVVDHETNSSIPEIPLPIKSFYFVWNA   |
| Q9VNB5 | TNSSIPEIPLPIKSFYFVWNASHGMYMISFAFQIYYVLF    |
| Q9VCA2 | KLAVFLLAKPDFRCALPYENGSIYELSPHLWNLSPENER    |
| Q9VCA2 | FRCALPYENGSIYELSPHLWNLSPENERCSYDVEDYTEEY   |
| Q9VCA2 | SPENERCSYDVEDYTEEYLNCSI PRSSNETKTCSSYVYDR  |
| Q9VCA2 | SYDVEDYTEEYLNCSI PRSSNETKTCSSYVYDRSKYLNSAV |
| Q8GWH3 | FLCYLPKEEKATSGWTSSQQNISTVMMETQQLVKLTPDEL   |
| Q8GWH3 | NKIVQEFLGTFDPEATAAFNQTVSDASTDASQRYHSHVYT   |
| Q8GWH3 | QTVSDASTDASQRYHSHVYTNCTTCDLTGSPREVEVRFVCA  |
| O70458 | VPALTHEELNMFQIEISRLNISNTI WVENYSTTVKREEAV  |
| O70458 | NTI WVENYSTTVKREEAVRWNWTSDIPLKCVKHFIRIRALV |
| O70458 | FIRIRALVDDTKSLPQSSWGNWSSWKEVNAKVSVEPKSLI   |
| O70458 | SVEPKSLIFPKDKVLEEGSNVTICLMYQNVYVNSCKLQD    |
| O70458 | GPKRIFGTVLFVSKVLEE FKNVSCETRDFTLDCSWEPGVD  |
| O70458 | DCSWEPGVDTTLTWRKQRFQNYTLCEFSKRCVSNYRNSY    |
| O70458 | VSNYRNSYTWQITEGSQEMYNFTLTAENQLRKRSVNINFNL  |
| O70458 | YNFTLTAENQLRKRSVNINFNLTHRHPKAPQDVTLKIIGA   |
| O70458 | NNYTLLCQVKLQYGEVIEHNVSVHMSANYLFSDDLDPDTKY  |
| O70458 | NEAKPTESEHYCVWAPALSTNLSLDLQPYKIRITTNMSGA   |
| O70458 | NDSGHEEVKEKTIKGIKDAFNISWEPVSGDTMGYVVDWCAH  |
| O70458 | DWCAHSQDQRCDLQWKNLGPNTTSTTITSDDFKPGVRYNFR  |
| O70458 | NQPWERTLLPDNSVLCKYDINGSETKTLTVENLQPESLYEF  |
| O70458 | QPESLYEFFVTPYTSAGPGPNETFTKVTPDARSHMLLQII   |
| P10451 | NAVSEETNDFKQETLPSKSNESHDMDDDEDDDDHVDS      |
| P10451 | DDMDEDDDDHVDSQDSIDSNSDDVDVDDDDSHQSDSHHS    |
| Q7RTW8 | KDIIIDLGEIRERAIQSPGVNRSFLITLERCFOMLNSLEC   |
| Q7RTW8 | FLQPDITERLPRDLREDAFKNLSAVFKDLYDKTSAHSQRAL  |
| Q7RTW8 | SAHSQRALYSWMTGILQTSNATDSDASWVSAEHLWVLGRY   |



|        |                                              |
|--------|----------------------------------------------|
| Q7RTW8 | SFEEITKISPIEIGLFI SYDNATKQLDMVYDITPELAQAFI   |
| Q7RTW8 | TPELAQAFLERISSNFNMRNTSTIHRQAHELWALEPFPKM     |
| Q7RTW8 | RGFQAGVQKLAELLDIAMENQTLNETLGSLSDAVVGLTYS     |
| Q7RTW8 | AGVQKLAELLDIAMENQTLNETLGSLSDAVVGLTYSQLES     |
| Q7RTW8 | SQVILSAKYLAHEKVLSFYNVSQMGALLAGVSTQAFCSMK     |
| Q7RTW8 | IQGAFFKEVSLFDLRRQPGFNSTVLKDKELGRSQALFLYEL    |
| Q7RTW8 | KMARTLPTKEFLWAVFQSVRNSDDKI PSYDPMPGCHGVVAP   |
| Q7RTW8 | MPSYWREHHIVSLGRIALALNESELEQLDLSSIDTVASLSW    |
| Q7RTW8 | SIQDLKSFHLVGLGATLCAINITEIPLIKISEFRVVVARIG    |
| P01012 | VMEEKIKVYLPRMKMEEKYNLTSVLMAMGITDVFSSSANL     |
| O01739 | YRDLAEPFLGPTSLFDLPRNTTRGIHYTAYTSEGLRFCP      |
| O01739 | PVIDHVYMGTVKQEGAFGNVTSADIQDITSRYVALQPSF      |
| O01739 | FVGYRPRKQVRVEKQIRETNGSKKFTVVHNYGHSNGFTL      |
| P81382 | SAGQLYEESLGKVVVEELKRTNCSYILNKYDYSTKEYLIKE    |
| P81382 | IHGGKSTTDLPSRFIYYPNHNFTNGVGVIIAYGIGDDANFF    |
| Q6STF1 | SAGQLYEESLGKVVVEELKRTNCSYILNKYDYSTKEYLLKE    |
| Q6STF1 | IHGGKSTTDLPSRFIYYPNHNFTSGVGVIIAYGIGDDANFF    |
| Q96RQ9 | EKCMQDPDYEQLLKVVTWGLNRTLKPQRVIVVAGVAGLVA     |
| Q96RQ9 | AMRMPSHRI LHKLCQGLGLNLTKFTQYDKNTWTEVHEVKL    |
| Q96RQ9 | RKAMKKFERHTLLEYLLGEGNLSRPAVQLLDVMSSEGGFFY    |
| P0DI84 | SAGQLYEESLGSVAVKDLKRTNCSYILNKYDYSTKEYLIKE    |
| P45850 | KPMSEAGDDFLFSSKLTAGNTSTPNGSAVTELDVAEWPGT     |
| P45850 | AGDDFLFSSKLTAGNTSTPNGSAVTELDVAEWPGTNTLGV     |
| Q99571 | QETDSVVSSVTTKVGVAVTNTSKLGFRIWDVADYVIPAQE     |
| Q99571 | VIPAQEENSLFVMTNVILTMNQGLCPEIPDATTVCKSDA      |
| Q99571 | TAGSAGTHSNGVSTGRCVAFNGSVKTCVAAWCPVEDDTHV     |
| Q99571 | WCPVEDDTHVPQPAFLKAAENFTLLVKNNIWIYPKFNFSKRNI  |
| Q99571 | LKAAENFTLLVKNNIWIYPKFNFSKRNI LPNITTTYLKSCIY  |
| Q99571 | LVKNNIWIYPKFNFSKRNI LPNITTTYLKSCIYDAKTDPFPCP |
| Q99572 | WCPIEAVEEAPRPALLNSAENFTVLIKNNIDFPGHNYTTRN    |
| Q99572 | LNSAENFTVLIKNNIDFPGHNYTTRN ILPGLNITCTFHKTQ   |
| Q99572 | KNNIDFPGHNYTTRN ILPGLNITCTFHKTQNPQCPI FRLGD  |
| Q99572 | TQNPQCPI FRLGDI FRETGDNFSDVAIQGGIMGIEIYWDCN  |
| Q99572 | RWFHHCPRPKYSFRRLDDKTTNVSLYPGYNFRYAKYYKENNV   |
| Q9Z1M0 | KEPVISSVHTKVGIAEVTENVTEGGVTKLGHISIFDTADYT    |
| Q9Z1M0 | WCPTEEKEAPRPALLNSAENFTVLIKNNIHFPGHNYTTRN     |
| Q9Z1M0 | LNSAENFTVLIKNNIHFPGHNYTTRN ILPTMNGSCTFHKTW   |
| Q9Z1M0 | KNNIHFPGHNYTTRN ILPTMNGSCTFHKTWDPQCSI FRLGD  |
| Q9Z1M0 | TWDPQCISIFRLGDI FQEAENFTEVAVQGGIMGIEIYWDCN   |
| Q96FE7 | CLNWLDASGLASAPVSGAGNHSYCRNPDEDPGFPWCYVSG     |
| Q32P28 | FEDFLPSHYNYLQFAYYNI GNVTQAVECAKTYLFFPNDEV    |

|        |                                             |
|--------|---------------------------------------------|
| Q32P28 | REGGPLLYEGISLTMNSKLLNGSQRVVMDGVISDHECQELQ   |
| Q32P28 | KALKLGQEGKVPLQSAHLYYNVTEKVRRIIMESYFRLDTPLY  |
| P13674 | TEWSELENLVLKDMSDGFISNLTIQRQYFPNDEDQVGAACA   |
| P13674 | QRANGNLKYFEYIMAKEKDVNKSASDDQSDQKTTPKKKGVA   |
| Q10576 | DTYRLDTKDLADGKIYADQGNVTFSAKDCFEIARAAYNEHD   |
| Q1RMU3 | TEWSELENLVLKDMSDGFISNLTIQRQYFPNDEDQVGAACA   |
| Q1RMU3 | QRANGNLKYFEYIMAKEKDANKSSDDQSDQKTTLKKKGAA    |
| Q06478 | FVGD PSSNELDRFSVCFPSNDTVKMIFLTRENKXHDFTL    |
| Q06478 | HTSSNLGTERTLGTVDYFV INNGSNQPGCRYIIGETCSHTRA |
| P23028 | PNEVFNDVSYECNEGQLTCNESNNECEMAVCNCDRAAAIC    |
| Q9NZ20 | EKRGWMPGTLWCGVGD SAGNSSELGVFQGPDLCCREHDRC   |
| Q9NZ20 | GGCRMYGTVP LARLQPRTFYNASWSSRATSPTPSSRS PAPP |
| Q9NZ20 | KQHLRKGPPHQKSGSRPSKANTTALQDPMVSPRLDVAPTGL   |
| Q9NZ20 | GPREIEFQLLNSAQEPLFHCNCTRRLARFLRLHS PPEVTNM  |
| Q9NZ20 | ELLGTTCTFKLAPPLDCVEGKNC SRDPRAIRVSARHLRRLQQ |
| Q9U256 | PTTTLSPIILKAKLPPVVK NATWECGTDEFTKSI SEGEIQ  |
| Q9U256 | PLFCDLVRTFGD GAYEASGNASTTEESPAEKDDYDYESHV   |
| P00616 | ECYAEAGKLSACKSVLSEFNNDTYSYECNEGQLTCNDDNDE   |
| Q6PXP0 | EERFLIVSGTKWCGN NNIAANYSDLGFLEADKCCRDHDHCD  |
| Q6PXP0 | TILNDCDEAFDHCLKEI SNNVTTDIRQKGAENVWRFYFQ    |
| P00630 | GDNELEERIIYPGT LWCGHGNKSSGPNELGRFKHTDACCRT  |
| P09466 | QDLELPKLAGTWH SMAMATNNISLMATLKAPLRVHITSLLP  |
| P09466 | ITSL LPTPEDNLEIVLHRWENNSC VEKVLGEKTENPKKFK  |
| Q8NCC3 | LELLLPVIDCWIDNIRLVY NKTSRATQFPDGV DVRVPGFG  |
| Q8NCC3 | PLKIREQQRS AVSTSWLLPYNYTWSPEKVFVQTPTINYTLR  |
| Q8NCC3 | LLPYNYTWSPEKVFVQTPTINYTLR DYRKFQDIFGFDGWL   |
| P05121 | FHKSDGSTVSVPMMAQ TNKFNYTEFTTPDGHYYDILELPYH  |
| P05121 | VPLSALTNILSAQLISHWKG NMTLPRLLVLPKFSLETEVD   |
| P05121 | LSDQEPLHVAQALQVKI EVNESGTVASSSTAVIVSARMAP   |
| P91268 | WDEKSFNDHETFNKDLGV INNKTI AISREKKVIDEFGAGL  |
| Q6UXH9 | SHITVAGWNVLADVRS PGFKNDTLRSGVVSVVDSLLCEEQH  |
| Q96RD7 | FSLSSLSDEFVCSIKSGIL RNDSTVPDQFQCKLIAVGI FQL |
| Q9JIP4 | FSLSSLSDEFVCSIKSGV LKNDSTIPDRFQCKLIAVGI FQL |
| Q8CEG0 | SLAFAQEFSSGSPISCF SPSNFVSRQAAYVDS SCWDSLAAH |
| O64411 | GANWVEGVNGGKMNPIWPI VNSTLKLNRFRSDFDYLAQNVY  |
| Q13219 | VTREQVDFQHHQLAEAFKQYNI SWELDVLEVSNSLRRRLI   |
| Q13219 | LAEAFKQYNI SWELDVLEVSNSLRRRLI LANCDISKIGDE  |
| Q13219 | LILANCDISKIGDENCDPECNHTLTGH DGGDCRHLRHPAFV  |
| Q13219 | DCNYERFNF DGGECDCPEITNVQTCTCFDPSPHRAYLDVNE  |
| Q13219 | QSCSDPCMETE PEFETGLCNDTNPAPKHKSCGDPGPGNDT   |
| Q13219 | LCNDTNPAPKHKSCGDPGPGNDTCGFHSFFNTPYNNFMSYA   |

|        |                                                   |
|--------|---------------------------------------------------|
| Q13219 | ELGSACHLCLEGRILVQYASNASSPMPCSPSGHWSPREAEG         |
| Q13219 | TDWSSGAVNDIKLLAVSGKNI SLGPQNVFCDVPLT IRLWD        |
| Q13219 | TSIKDCGVYTPQGFLDQWASNASVSHQDQQCPGWVI IGQPA        |
| Q13219 | EQSCVHFACEKTDCPELAVENASLNCSSSDRYHGAQCTVSC         |
| Q13219 | VHFACEKTDCPELAVENASLNCSSSDRYHGAQCTVSCRTGY         |
| Q13219 | GTTFGSQCSFQCRHPAQLKGNNSLLTCMEDGLWSFPEALCE         |
| Q13219 | SDASQGLGSNVIHCRKDGWTWNGSFHVCQEMQGC SVPNELN        |
| Q13219 | GSECATSCLDHNSESI I LFMNVTVRDI PHWLNPTRVERVVC      |
| P30558 | NPSENTFELVPLGDEEEEEKNE SVLLEGRAVYLNISLPPHT        |
| P30558 | DEEEEEKNE SVLLEGRAVYLNISLPPHT P P P P F I SEDASGY |
| P30558 | AIMGVVPLLLKEQTTRVPGLNIT TCHDVLSENLMQGFYSY         |
| P55085 | LGAA ILLAASLSCSGTIQGTNRSSKGRSLIGKVDGTSHTVG        |
| P55085 | ILLVTIPLYVVKQTFIPIPALNIT TCHDVLPEQLLVGDMFNY       |
| P09791 | LTKGKGKGGKGTKVSDDDTNGTDPDPEPEPEPEPEPEPEP          |
| Q6UWI2 | PTTIWTSSPQNTDADTASFSNGTHNNSVLPVTASAPTSLLP         |
| Q6UWI2 | WTSSPQNTDADTASFSNGTHNNSVLPVTASAPTSLLPKNIS         |
| Q6UWI2 | THNNSVLPVTASAPTSLLPKNISIESREEEITSPGNSWEGT         |
| Q6UWI2 | SSPSSLSTSPPEVFSASVTNHSSVTSTQPTGAPTAPESP           |
| P34446 | NRATCREVHVDMKGNLKKLNGSHLVPIEEKSHQFFGATVR          |
| P34446 | FIGAPGVWYQGAMFSQNIKNQTD RPNTEYGSKEYDHDMMG         |
| P34446 | RGNDLHGKLVLYTSKLMMINLTDEVSTQHGYCGGSVAVA           |
| P34446 | HRFFASSTMKDKLSP I HWSVNYTYVESKTGKLRGDKLEPAI       |
| P34446 | TAVADREKFLGTQDNTMLINVTVQNGGEDSYETKLYFDVP          |
| P34446 | RVTASSDKPPLAPISINAHVNSNDEEAHTVADNKVFTTIP          |
| P34446 | KNQLSLNGRSNPEQVDFSMTNKTRVDAFDDNEIGPVVSHLY         |
| Q27874 | EVTGKVVKESEFP CYLSRDNYTCSACIQYHESCAWCGAPM         |
| Q27874 | VQIKPQEMYVEIRPKSRVRFNVYRQAVDY PVDLYYLM DLS        |
| Q27874 | SGNLDAPEGGF DAVVQALACNKTIGWRERARKMIVFSTDAG        |
| Q27874 | LYTQLSNALPDVSSVGVLANDSRNIVDLIEKEYLKI SEKI         |
| Q27874 | DLIEKEYLKI SEKI IMVDNANASEGLKLTYSMCLDGTTLK        |
| Q27874 | CECNRPGMSTAALNEKCKRTNESA ICEGRGVCNCRCECNP         |
| Q27874 | TKCVEYKNCVMCQQWQTGFLNETACDQCEFKVIPVEELPNL         |
| Q27874 | ETACDQCEFKVIPVEELPNLNETT PCQFVDPADDCTFY YLY       |
| Q27874 | VDPADDCTFY YLYYDEATDNATVWVRKHKDCPPVPVLAI          |
| P15478 | KGII PATI LEFLEGQLQEVDNNTDARLADYFDVIGGTSTGG       |
| P15478 | FDVIGGTSTGGLLTAMITTPNETNRPF AAAKDIVPFYFEHG        |
| P15478 | DICYSTAAAPTFPPHYFATNTSNGDKYEFNLVDGAVATVD          |
| Q966B0 | RSL LISVISGTFKNNSSKQNKTLFFFDVPPFHWT LKTQNE        |
| Q966B0 | QNKTLFFFDVPPFHWT LKTQNESIQLGNRFKNRYFEFKYEI        |
| Q966B0 | FDLKATDKVVKTLVIRMI GINQTLNGGGKAEACLET FENCT       |
| Q966B0 | GINQTLNGGGKAEACLET FENCTEIPVDEDLI IDMPRADTL       |

|        |                                               |
|--------|-----------------------------------------------|
| Q966B0 | AYWGEFFSRLRWVSTQDHLNLISSTFHDDSGRVFALS PKTG    |
| Q08174 | YEAELENSPIGHSVIQVKANDSDQGANAIEIYTFHQAPEV      |
| Q08174 | NAPTEIRGIGLVTHQDGMANISEDVAEETAVALVQVSDRD      |
| Q08174 | VLVNVLD CNDNDPKFMLS GYNF SVMENMPALS PVGMVTVID |
| Q08174 | GENAQVQLSVEQDNGDFVIQNGTGTILSSLSFDREQQSTYT     |
| Q08174 | KVSDRGKPPRYGTALVHLYVNETLANRTLLETLLGHSLDTP     |
| Q08174 | GKPPRYGTALVHLYVNETLANRTLLETLLGHSLDTPLDIDI     |
| P21902 | TTERPPKQIPPNLPEVCGIHNTTTRIIGGREAPIGAWPFW      |
| P21902 | KHHEHFVLATYLNDAIILTLNDTVFTDRIRICLPYRKL        |
| P21902 | EVQLPIWEHEACRQAYEKDLNITNVYMCAGFADGGKDACQG     |
| Q96NT5 | LQGPLTTQYLWHRFSADLGYNGTRQRGGCSNRSADPTMQEV     |
| Q96NT5 | WHRFSADLGYNGTRQRGGCSNRSADPTMQEVETLTSHWTL      |
| Q6PEM8 | LQGPLTTQYLWHRFSTELGYNGTRHRENCGNQSADPLMKEV     |
| Q6PEM8 | WHRFSTELGYNGTRHRENCGNQSADPLMKEVETLTSHWTL      |
| Q61398 | SFLGPFLLAWVPLARGQTPNYTRPVFLCGGDVTGESGYVA      |
| P34610 | MKLDHFTWGDTRTFDMRVMNNTFYKPGGPIFFYTGNEGGL      |
| P34610 | GGLESFVTATGMMFDLAPMFNASIIFAEHRFYGQTQPFNGQ     |
| P34610 | FNASIIFAEHRFYGQTQPFNGQSYASLANVGYLTSEQALAD     |
| P34610 | ITSRTYIDNGCNRFILANAWNATLNLSSTDAGRQWLNNNTV     |
| P34610 | TYIDNGCNRFILANAWNATLNLSSTDAGRQWLNNNTVFKLD     |
| P34610 | NAWNATLNLSSTDAGRQWLNNNTVFKLDPRTKIRNQTDGWN     |
| P34610 | GRQWLNNNTVFKLDPRTKIRNQTDGWNLNAYLREAI EYMAM    |
| P34610 | GFLEPLPAWPVTVACGYMNANGTSFSDKDLVKAVANAANIY     |
| P34610 | DLVKAVANAANIYYNRPNFYCIDFSICGDQGTGGLGG         |
| P34676 | LKAAVVFVHRFYGKSQPFKNESYTDIRHLGYLSSQQALAD      |
| P34676 | PGKTQEESAEQLYKIVNLYNYTGDKSTHCANAARCD SAYS     |
| P34676 | PFTSEKYAEFCMQTFSSIHYNKTLRPLAGGLAFGATSLPS      |
| P84875 | VCDLPADRQCTAYIPQWFFNKTTEDCEKFVYGGCQGNANR      |
| P42785 | RALGSLHLPTNPTSLPAVAKNYSVLYFQQKVDHFGFNTVKT     |
| P42785 | KNGGSILFYTGNEGDIWFCNNTGFMWDVAEELKAMLVFAE      |
| P42785 | FLQPLPAWPIKVVCQYLKPNVSDSLLQNI FQALNVYNY       |
| P42785 | PNVSDSLLQNI FQALNVYNYSGQVKCLNISETATSSLGT      |
| P42785 | QNI FQALNVYNYSGQVKCLNISETATSSLGTLGWSYQACT     |
| P42785 | FQQWGVRRPSPWITTMYGKNISSHTNIVFSNGELDPWSSG      |
| Q8NBP7 | NAFGGEGVYAIARCCLLPQANCSVHTAPPAEASMGTRVHCH     |
| Q9UHG3 | FSSVEKLLHALGGDDFLGMLNRTLLETLQKAGFSEKFLNEM     |
| Q9UHG3 | TRSDFYDIVLVATPLNRKMSNITFLNFDPIIEFHQYYQHI      |
| Q9UHG3 | IEEFHQYYQHIVTTLVKGE LN TSI FSSRPIDKFLNTVLT    |
| Q9CQF9 | FSSVEKLMHAIGDDYVRLNQTRENLKAGFSETFLNEM         |
| Q9CQF9 | THSDFYDIVLVAAPLNRKMSNITFRNFDPIIEFNDPYQQL      |
| Q9CQF9 | IEEFNDPYQQLVTTFIKGE LN STLFSSRPKDQFGLSAILVT   |

|        |                                             |
|--------|---------------------------------------------|
| Q9NZQ7 | LLNAFTVTVPKDLYVVEYGSNMTIECKFPVEKQLDLAALIV   |
| Q9NZQ7 | HQVLSGKTTTTNSKREEKLFNVTSTLRINTTTNEIFYCTFR   |
| Q9NZQ7 | TTTNSKREEKLFNVTSTLRINTTTNEIFYCTFRRLDPEENH   |
| Q9NZQ7 | INTTTNEIFYCTFRRLDPEENHTAELVIPELPLAHPNERT    |
| Q3L245 | FVTRVPGLASTLGAGSPIDWNYYTIPQDGLDGRSLDYPRAK   |
| Q3L245 | HIDPSVHGFDGKLSVSAAYSNISFNDDLFEETKELNAEFPF   |
| Q3L245 | GDNVHVLVNTLVTRVLSASNGTDFRKFVEFAVDANSPPKQL   |
| Q3L245 | RKVLQAVGIDTLIDNPSVGKNSLDQGATSVMFDTTLPSTDF   |
| Q17770 | ISLEEDMTKFKPDFEETITENISKFTQNYLDGSVKPHLMSE   |
| Q13087 | ELAEFVGVTEYPTLKFRRNGNRTHPEEYTGPRDAEGIAEWL   |
| Q13087 | SQTSAKIFAARILNHLLLFVNQTLAAHRELLAGFGEAAPRF   |
| Q9NZ53 | REKKEVEKQEEEEEEELLPVNGSQEEAKPQVRDFSLTSSSQ   |
| Q9NZ53 | STQVICKDWSNLAGKNYIILNMTENIDCEVFRQHRGPQLLA   |
| P16284 | FTINSVDMKSLPDWTVQNGKNLTLQCFADVSTTSHVKPQHQ   |
| P16284 | TSHVKPQHQLMFYKDDVLFYNISSMKSTESYFIPEVRIYDS   |
| P16284 | PSPRVTLDKKEAIQGGIVRVNCSVPEEKAPIHFTIEKLELN   |
| P16284 | HNRHGKAVYSVMAMVEHSGNYTCKVESSRISKVSSIVVNI    |
| P16284 | GNYTCKVESSRISKVSSIVVNITELFSKPELESSFTHLDQG   |
| P16284 | LFSKPELESSFTHLDQGERLNLSCSIPGAPPANFTIQKEDT   |
| P16284 | HLDQGERLNLSCSIPGAPPANFTIQKEDTIVSQTQDFTKIA   |
| P16284 | SISGTLPISYQLLKTSKVLENSTKNSNDPAVFKDNPTEDVE   |
| P16284 | PITYKFYREKEGKPFYQMTSNATQAFWTKQKASKEQEGEYY   |
| Q08481 | TSKRSRQHRVLFYKDDAMVYNVTSREHTESYVIPQARVFS    |
| Q08481 | SKPKVTLDKKEVTEGGVTVNCSLQEEKPIFFKIEKLEVG     |
| Q08481 | GHYTCKVESNRISKASSIMVNITELFPKPKLEFSSSRLDQG   |
| Q08481 | RLDQGEELDLSCSVSGTPVANFTIQKEETVLSQYQNFASKIA  |
| Q08481 | GTPVANFTIQKEETVLSQYQNFASKIAEESDSEYVSTAGIG   |
| Q08481 | HDAKSEIIKGHAIGISCQSENGTAPITYHLMKAKSDFQMLE   |
| Q08481 | PITFQFYKEKEDRPFHQAVVNDTQAFWHNKQASKKQEGQYY   |
| P36955 | QLPLTGSMISIFFLPLKVTQNLTLIEESLTSEFIHDIDREL   |
| Q01172 | APSVSVEYVYAGVGLGITVTSNKSILIGGSSGAIKGKGLRIV  |
| Q02567 | GPKAGGGADGSMMLLFPPTVEPNFSANNGIDDSVNNLIPFMQK |
| Q02567 | AVALSNCPGAPRLEFLAGRPNKIIAAVDGLIPEPQDSVTKI   |
| Q02567 | FDTQVFLEVLLKGVGFPGSANNTGEVASPLPLGSGSDTGEM   |
| P27678 | LENYLDVEYFGTIGIGTPAQNFTVVFDTGSSNLWVPSVICY   |
| P00793 | SACSNHRRFDPKSSSTVSTNETVYIAYGTGSMGILGYDT     |
| P16311 | GSCWAFSGVAATESAYLAYRNTSLDLSEQELVDCASQHGCH   |
| P08176 | GSCWAFSGVAATESAYLAYRNQSLDLAEQELVDCASQHGCH   |
| Q17758 | APDSSVRKPISFTGDDFFQPNI TFDNLAPNCPKFTAEPMLA  |
| O01840 | VNETMEFPPLGRIYLQRVGNESLISDFRYKSDGRLIGDGM    |
| O01840 | LPKGRTELDAGIYTFNTGLKNESQEIDISTPNKGYVMAVFR   |

|        |                                              |
|--------|----------------------------------------------|
| P00433 | LHASLSDAQLTPTFFYDNSCPNVSNIVRDTIVNELRSDPRIA   |
| P00433 | LRLHFHDCFVNGCDASILLDNTTSFRTEKDAFGNANSARGF    |
| P00433 | LPAPFFTLFQLKDSFRNVGLNRSSDLVALSGGHTFGKNQCR    |
| P00433 | LSGGHTFGKNQCRFIMDRLYNFSNTGLPDPNTTYLQTLR      |
| P00433 | RFIMDRLYNFSNTGLPDPNTTYLQTLRGLCPLNGNLSAL      |
| P00433 | DPTLNTTYLQTLRGLCPLNGNLSALVDFDLRTPTFIDNKYY    |
| P00433 | VNLEEQKGLIQSDQELFSSPNATDTIPLVRSFANSTQTFN     |
| P00433 | QELFSSPNATDTIPLVRSFANSTQTFNFAVEAMDRMGNIT     |
| P22195 | HFHDCFVQGCDAVLLDDTSNFTGEKTAGPNANSIRGFVI      |
| P22195 | RDSTTASLSSANSDLPAFFNLSGLISAFSNKGFTTKELVT     |
| P80679 | LTANLAGANSAIPSPFEGLSNITSKFSAVGLNTNDLVALSG    |
| P80679 | LSGAHTFGRARCGVFNRLNFSGTNGPDPNTLNSTLLSSLQ     |
| P80679 | GVFNRLNFSGTNGPDPNTLNSTLLSSLQQLCPQNGSASTI     |
| P80679 | GPDPNTLNSTLLSSLQQLCPQNGSASTITNLDLSTPDAFDNN   |
| P80679 | QELFSTLGSATIIVVTSFASNQTLFFQAFQSMINMGNISP     |
| P82600 | WMEGYPFDRVLEPAYEDGVWAPRIHSVTGNLLPSARVISV     |
| P82600 | FTLSRGFTTKHGQAI ECCTPNCTA PLFGPHRH FACFPIEVP |
| P82600 | TLFMREHNRLAVGLSKINPHWDDERLYQEARRILIAEYQNV    |
| P82600 | LGEVALLAQVYESPDDVDLWPGGVLEPPAEGAVVGSTFVA     |
| P14222 | HTPPLHPDFKRALGDLPHHFNASTQPAYLR LISNYGTHFIR   |
| P10820 | QKPLHLDFKKALRALPRNFNSSTEHAHRLISSYGTHFIT      |
| P10820 | KREALRQAISHYIMSRARWQNC SRPCRSQGHKSSHDSCQCE   |
| P80025 | RNGQVWEESLKRRLRRDRTLNTVTDPSLDLTALSWEVCGGAP   |
| P80025 | AREVSNKIVGYLDEEGVLDQNRSLLFMQWQIVDHDLDFAP     |
| P80025 | SFLDASLVYGSEPSLASRLRNLSSPLGLMAVNQEAWDHGLA    |
| P80025 | DHGLAYLPFNKPKSPCEFINNTARVPCFLAGDFRASEQIL     |
| P80025 | YLPIVLGSEMOKWIPPYQGYNNSVDPRISNVFTFAFRFGHM    |
| A5JUY8 | RNGQVWEESLKRRLRRDRTLNTVTDPSLDLTALSWEVCGGAP   |
| A5JUY8 | AREVSNKIVGYLDEEGVLDQNRSLLFMQWQIVDHDLDFAP     |
| A5JUY8 | SFLDASLVYGSEPSLASRLRNLSSPLGLMAVNQEAWDHGLA    |
| A5JUY8 | DHGLAYLPFNKPKSPCEFINNTARVPCFLAGDFRASEQIL     |
| A5JUY8 | YLPIVLGSEMOKWIPPYQGYNNSVDPRISNVFTFAFRFGHM    |
| P22079 | RNGQVWEESLKRRLRQKASLTNTVTDPSLDLTALSWEVCGGAP  |
| P22079 | AREVSNKIVGYLNEEGVLDQNRSLLFMQWQIVDHDLDFAP     |
| P22079 | SFLDASFVYSSEPSLASRLRNLSSPLGLMAVNQEVSDHGLP    |
| P22079 | DHGLPYLPYDSKPKSPCEFINNTARVPCFLAGDSRASEHIL    |
| P05164 | LHVALDLLERKLRSLWRRPFNVTDVLTPAQLNVLSKSSGCA    |
| P05164 | IKNQADCI PFFRSC PACPGSNI TIRNQINALTSFVDASMVY |
| P05164 | SFVDASMVYGSSEPLARNLRNMSNLGLLAVNQRFQDNGRA     |
| P05164 | DNGRALLPFDNLHDDPCLLTNRSARIPCFLAGDTRSSEMPE    |
| P05164 | LPLVLGPTAMRKYLP TYRSYNDSDPRIANVFTNAFRYGH     |

|        |                                            |
|--------|--------------------------------------------|
| P00434 | LSGAHTIGQSRCVNFRRVYNETNINAFAFATLRQRSCPRAA  |
| P09933 | RDTDQLPTDVLSEELLSTIANLSGCLPHMLPPSCPHCLAN   |
| P09933 | ADCQITCENRSPCFPIQLFTNASGAAGATCLFFYRSSAACG  |
| P09933 | LFFYRSSAACGSGRQALVGNLSWAAPRQQMNLTSFLDAS    |
| P09933 | SFLDASTVYGSSPAQEQRLRNWTSAEGLLRVNTRHRDAGRA  |
| P28313 | AVGMSNCPGSPRLEFLTGRSNSSQSPPSLIPGPGNTVTAI   |
| P28314 | AVGMSNCPGSPRLEFLTGRSNSSQSPPSLIPGPGNTVTAI   |
| Q3UUQ7 | LTGTSMMWVFKVSRWSYVAYNESDKIYFAPPLANHRKIYTH  |
| Q3UUQ7 | THAYCQSTMLDTNSWIFGCINSTSMCRQGVDLQSWKAELLPT |
| Q3UUQ7 | IAQVPSSTDISLKLHVAQFENDSHVALLKMYTSSDCQYEV   |
| Q7K0P4 | ASNGDRTQFFHNCRQNCERTNCSADGLEIQEQAVKFYQQSV  |
| P98160 | LGSGDLGSGDFQMVYFRALVNFTRSI EYSPQLEDAGSREFR |
| P98160 | RRFRDQIRLRFDPDDFKGVNVTMPAQPGTPLSSTQLQID    |
| P98160 | SVQPSDAGVYICTCRNLHQSNTSRAELLVTEAPSKPITVTV  |
| P98160 | RLRLPQVSPADSGEYVCRVENGGPKESITVSVLHGTHSG    |
| P98160 | ISLEWKTRNQELEDNVHISPNGSIITIVGTRPSNHGTYRCV  |
| P98160 | NHGTYRCVASNAYGVAQSVVNLVSHGPPVTVSVLPEGPVWVK |
| P98160 | EGDTLIPRVAQQDSGQYICNATS PAGHAEATII LHVESPP |
| P98160 | VTLRLSLTQGS LIVGDLAPVNGTSQGKFQGLDLNEELYLGG |
| P98160 | FIGCVRELRIQGEIVFHDNLTAHGISHCPTCRDRPCQNG    |
| P98160 | LHTLLYLGGEVPSVPLSPATNMSAHFRGCVGEVSVNGKRLD  |
| Q05793 | LGSGDVGSGDFQMVYFRALVNFTRSI EYSPQLEDASAKEFR |
| Q05793 | ALKLWRCDGDFDCEDRTDEANCSVKQPGEVCGPTHFQCVST  |
| Q05793 | LRFRDQIRLSFDQPNDFKGVNVTMPSQPGVPLSSTQLQID   |
| Q05793 | SCSPGHSGRHCERCAPGYGNPSQGPCHRDGQVPEVLGCG    |
| Q05793 | PPQLTVQPGQAEFRCSATGNPTPMEWIGGPGQLPAKAQ     |
| Q05793 | AGSSHPEHEASFKLTVPSSQNSSFRLRSPVISIEPPSSTVQ  |
| Q05793 | IKVEWKIRDQELEDNVHISPNGSIITIVAPGPATMEPTACV  |
| Q05793 | TMEPTACVASNVYGMAQSVVNLVSHGPPVTVSVLPEGPVHVK |
| Q05793 | EGNTLVIIPRVAQQDSGQYICNATNSAGHTEATVVLHVESPP |
| Q05793 | VTLRLSLTQGS LIVGNLAPVNGTSQGKFQGLDLNEELYLGG |
| Q05793 | FVGCVRELRIQGEIVFHDVNLTHGISHCPTCQDRPCQNG    |
| Q05793 | LHTLLYLGGEVPSVQLSPATNMSAHFHGCVGEVSVNGKRLD  |
| P07898 | PEEEDTNALLTPRIKWSKLSNGTEIVLLVATGGKIRLNAEY  |
| P07898 | LPNYPAIPTDATLEIKALRSNHTGIYRCEVMYGIEDRQDTI  |
| P07898 | ARPNCGGNLVGVRTVYVLPANQGTGYPHPSRYDAICYSGDD  |
| P07898 | GSAFTIQTVTQTEVELPLPRNVTEEEARGSIATLEPMEITA  |
| P07898 | VLPDLFATSVTVETASPREENVTREEITGIWAVPEEVTSV   |
| P07898 | FATQPEQFTFQEAQLYCESQNATLASAGQLHAAWKQGLDRC  |
| P07898 | SFRPACGGDAPGVRTIYQHHNQTFPDLPSRHHAFCFRALP   |
| P07898 | EGIPSGEETTVELELSSEPENQTAQGTEVFPTDVSLLSARP  |

|        |                                               |
|--------|-----------------------------------------------|
| P07898 | LSARPSAFPATVIPEETSTNASIPEVSGEFPESEGEHPTSG     |
| P16112 | LPNYPAIPSDATLEVQSLRSNDSGVYRCEVMHGIEDSEATL     |
| P16112 | GCYGDKDEFPGVRTYGIKRDNETYDVYCFABEEMEGEVFYAT    |
| P16112 | KARPNCGGNLLGVRTVYVHANQTGYDPSSRYDAICYTGED      |
| P16112 | EEDITVQTVTWPDMELPLPRNITEGEARGSVILTVKPIFEV     |
| P16112 | PEEPFTFAPEIGATAFAEVENETGEATRPFWGFPTPGLGPAT    |
| P16112 | FATRLEQFTFQEALEFCESHNATATTGQLYAAWSRGLDKCY     |
| P16112 | TFRPACGGDKPGVRTVYLYPNQTGLPDLPSRHHAFRCFRGIS    |
| P16112 | TTAVPSGETTAILEFTTEPENQTEWEPAYTPVGTSPPLGIL     |
| P16112 | EPSGEPFGTPYFSGDFASTTNVSGESSVAMGTSGEASGLPE     |
| Q29011 | LPNYPAIPSDATLEIQNLRNSDSGIYRCEVMHGIEDSEATL     |
| Q29011 | GCYGDKDEFPGVITYGIKRDNETYDVYCFABEEMEGEVFYAT    |
| Q29011 | KARPNCGGNLLGVRTVYVLANQTGYDPSSRYDAICYTGED      |
| Q29011 | EEDITIQTVTWPDELPLPRNITEGEARGTVILTVKPVFEF      |
| Q29011 | PEEPFTFAPGTGATAFPEAENRTGEATRFWAFPEESTPGLG     |
| P07897 | LPNYPAIPSDATLEIQNLRNSDSGIYRCEVMHGIEDSEATL     |
| P07897 | GCYGDKDEFPGVRTYGIKRDNETYDVYCFABEEMEGEVFYAT    |
| P07897 | KARPNCGGNLLGVRTVYVLANQTGYDPSSRYDAICYTGED      |
| P07897 | EEDITIQTVTWPDELPLPRNITEGEARGNVIILAKPIFDM      |
| P07897 | FATQMEQFTFQEAQAFCAAQATLASTGQLYAAWSQGLDKC      |
| P07897 | NFRPACGGDKPGVRTVYLYPNQTGLPDLPSKHHAFRCFRGVS    |
| P07897 | MTSGDRTEISGEWSDHTSEVNVTVSTTVPESRWAQSTQHPT     |
| P05979 | VRFGLDRYQCDCTRGTGYSGNCTIPEIWTWLRRTLRPSPSF     |
| P05979 | IPSPPTYNIAHDYISWESFSNVSYTRILPSVPRDCPTPMD      |
| P05979 | LMPDSFRVGPQDYSYEQFLFNTSMLVDYVEALVDAFSRQP      |
| P05622 | LGPQTSRGLVITPPGPEFVLNISSFVLTCSGSAFVMMWQM      |
| P05622 | PWQEAAMNQDGTFFSSVLTILTNTVGGDTGEYFCVYNNSLGPE   |
| P05622 | SVLTILTNTVGGDTGEYFCVYNNSLGPELSEKRIYIFVPDP     |
| P05622 | GDREVDSDTYVYVSLQVSSINVSNAVQTVVRQGESITIRC      |
| P05622 | IGSILHIPTAELSDSGTYTCNVSVSVNDHGDEKAINISVIE     |
| P05622 | GTYT CNVSVSVNDHGDEKAINISVIENGYVRLLETGLDVEI    |
| P05622 | VSVSVNDHGDEKAINISVIENGYVRLLETGLDVEIAELHRS     |
| P05622 | RTL RVFEAYPMP SVLWLNKDNRTLGDGSGAGELV LSTRNMSE |
| P05622 | LKDNRTLGDGSGAGELV LSTRNMSETRYVSELI LVRVKVSEA  |
| P05622 | SHPANGEQTIRCRGRMPQPNVTWSTCRDLKRCPRKLSPTP      |
| P05622 | WSTCRDLKRCPRKLSPTPLGNSKEESQLETNVTFWEEQDE      |
| P05622 | RKLSPTPLGNSKEESQLETNVTFWEEQDEYEVVSTLRLRH      |
| P09619 | LEPQISQGLVVTPPGPELVNVSSTFVLTCSGSAFVVMWERM     |
| P09619 | PPQEMAKAQDGTFFSSVLTILTNTGLDGTGEYFCTHNSRGL     |
| P09619 | SVLTILTNTGLDGTGEYFCTHNSRGLTDERKRIYIFVPDP      |
| P09619 | GDREVDSDAYVYVRLQVSSINVSNAVQTVVRQGENITLMC      |



|        |                                              |
|--------|----------------------------------------------|
| P09619 | QVSSINVSNAVQTVVRQGENITLMCIVIGNEVVNFEWTP      |
| P09619 | IRSI LHIPSAELEDSEGTTCNVTESVNDHQDEKAINITVVE   |
| P09619 | GTYT CNVTESVNDHQDEKAINITVVESGYVRLLEVGTLQF    |
| P09619 | RTLQVVF EAYPPPTVLWFKDNRTLGDSSAGEIALSTRNVSE   |
| P09619 | FKDNRTLGDSSAGEIALSTRNVSETRYVSELTLVRVKVAEA    |
| P09619 | WSACRDLKRCPRELPPTLLGNSSEESQLETNVTYWEEEQE     |
| P09619 | RELPTLLGNSSEESQLETNVTYWEEEQEFVVSTLRLQH       |
| Q05769 | MSTGFDQYKDCCTRGTGFYGENCTTPEFLTRIKLLKPTPNT    |
| Q05769 | IDSPPTYNVHYGYKSWEAFSNLSYTRALPPVADDCPTPMG     |
| Q05769 | LLPDTFNIEDQEYSFKQFLYNNSILLEHGLTQFVESFTRQI    |
| Q05769 | GCPFTS FNVQDPQPTKTATINASASHSRLLDDINPTVLKRR   |
| P35354 | MSVGFQYKDCCTRGTGFYGENCSTPEFLTRIKLFLKPTPNT    |
| P35354 | IDSPPTYNADYGYKSWEAFSNLSYTRALPPVDDCPTPLG      |
| P35354 | LLPDTFQIHDQKYNQQFIYNNSILLEHGITQFVESFTRQI     |
| P35354 | GCPFTS FSVDPPELIKTVTINASSRSRGLDDINPTVLLKER   |
| P58822 | KKDLGNPTLSSWLPPTDCCNRTLGLVLCDDTDTQYRVNLL     |
| P58822 | PIPPAIAKLTQLHYLYITHTNVSGAIPDFLSQIKTLVTLDF    |
| O74213 | SGGHGLSIGSVGGRSDNTVKNVTFVDSTIINS DNGVRIKTN   |
| P26213 | SGGHGLSIGSVGGRDNTVKNVTISDSTVSNSANGVRIKTI     |
| P26214 | IGGHGLSIGSVGDRSNNVKNVTIEHSTVSNSENAVRIKTI     |
| Q95T64 | VSEEGNIYVGRGDWANTYANQTLAITFMGDYGRFKPGPKQ     |
| Q95T64 | LLAHAVANRNIDVDYKLV AQNQT KVTRS PGAYVYQEIRNWP |
| Q9GNK5 | EIPDLELPVGLVIALPTNSENCSQAICVLRVRLQTYDIE      |
| Q96PD5 | APNSGPHNRLYHFLGAWSLNATELDCPLSPELGLTKEV       |
| Q96PD5 | EPVHLQLQCMSQEQLAQVAANATKEFTEAFLGCPAHPRCR     |
| Q96PD5 | WVGAHTLGHNSRGFGVAIVGNYTAALPTEAALRTVRDTPS     |
| Q8VCS0 | QKVPVTEASITASAWILSAKNSSTHNSLHQRLLLKAPSHNT    |
| Q8VCS0 | KNSSTHNSLHQRLLLKAPSHNTTEPDPHLSPELQALISEV     |
| Q8VCS0 | TGDTLANIRATWPGLMDAFP NASSPDVGATLPNDKAKPTT    |
| Q8VCS0 | QVWEALVLLQKLEPEHLQLQNISQEQLAQVATLATKEFTEA    |
| Q8VCS0 | WVGAHTRGYNRSGFGVAFVGNVTGSLPNEAALNTVRDALPS    |
| P21809 | LRYSKLYRLGLGHNQIRMIENGSLSFPLTLRELHLDNNKLS    |
| P21809 | RVPAGLPDLKLLQVVYLHTNNITKVGVDNDFCPVGFVVKRAY   |
| P21810 | LRYSKLYRLGLGHNQIRMIENGSLSFPLTLRELHLDNNKLA    |
| P21810 | RVPSGLPDLKLLQVVYLHSNNITKVGVDNDFCPMGFVVKRAY   |
| P21793 | IENGAFQGMKKLSYIRIADTNI TTIPQGLPPSLTELHLDGN   |
| P21793 | KGLNNLAKLGLSFNSISAVDNGSLANTPHLRELHLDNNKLV    |
| P21793 | KVPGGLADHKYIQVVYLHNNNISAI GSNDFCPPGYNTRKAS   |
| P07585 | IENGAFQGMKKLSYIRIADTNI TSIPQGLPPSLTELHLDGN   |
| P07585 | KGLNNLAKLGLSFNSISAVDNGSLANTPHLRELHLDNNKLT    |
| P07585 | RVPGGLAEHKYIQVVYLHNNNISVVGSSDFCPPGHNTKAS     |

|        |                                              |
|--------|----------------------------------------------|
| P05088 | LVLLTHANSASQTSFSFQRFNETNLILQRDATVSSKGQLRL    |
| P05088 | EPTLSSLGRAFYSAPIQIWDNNTGAVAASPTSFTFNIDVFN    |
| P05088 | NTTGAVAASPTSFTFNIDVFNNSGPADGLAFVLLPVGSQPK    |
| P05087 | LVLLTHANSSNDIYFNFQRFNETNLILQRDASVSSSGQLRL    |
| P05087 | EPRVGSGLGRAFYSAPIQIWDNNTGTVASFATSFTFNIQVFN   |
| O70362 | ICKRGKYHDVSEERTHWTPFLNASIHYIRENYPLPWEKDTEK   |
| O70362 | LDDMAFWSTNIYRLTSFMLENGTSDCNLPENPLFISCDGRN    |
| O70362 | NGTSDCNLPENPLFISCDGRNHTLSGSKVQKNDFHRNLTMF    |
| O70362 | CDGRNHTLSGSKVQKNDFHRNLTMFISRDIRKNLNYTERGV    |
| O70362 | KNDFHRNLTMFISRDIRKNLNYTERGVFYSTGSWARPESVT    |
| O70362 | DGLPDLAVGAPSVGSGQLTYNGSVYVYVYGSQQGRLSSSPNV   |
| O70362 | YNGSVYVYVYGSQQGRLSSSPNVTISCKDTCNLGWTLLATD    |
| O70362 | VNGEEDFSWFGYSLHGVTVANRSLLLIGSPTWKNVSRMARS    |
| O70362 | LHGVTVANRSLLLIGSPTWKNVSRMARSSHKKNQEEKSLGK    |
| O70362 | SGDKAMGKLGTSLSGYSVVRVNGTLTQVLLVGAPTHDDVSKM   |
| P80108 | ICKGGKFHDVSESTHWTPFLNASVHYIRENYPLPWEKDTEK    |
| P80108 | LDDMAFWSTNIYHLTSFMLENGTSDCNLPENPLFIACGGQQ    |
| P80108 | GTSDCNLPENPLFIACGGQQNHTQGSKMQKNDFHRNLTSL     |
| P80108 | CGGQQNHTQGSKMQKNDFHRNLTSLTESVDRNINNYTERGV    |
| P80108 | KNDFHRNLTSLTESVDRNINNYTERGVFVNSWTPDSMSF      |
| P80108 | YKGAUVYVYFGSKQGMSSSPNITISCDIYCNLGTLLAAD      |
| P80108 | AAFYSGPSLSKKEKLNVEANWTVRGEEDFSWFGYSLHGVT     |
| P80108 | VRGEEDFSWFGYSLHGVTVDNRTL LLVGSPTWKNASRLGHL   |
| P80108 | LHGVTVDNRTL LLVGSPTWKNASRLGHLHHRDEKKS LGRV   |
| P80108 | SGDKAMGKLGTSLSGHVLMNGTLKQVLLVGAPTYDDVSKV     |
| Q95XM2 | EPQPKLAATMLLVTTGGTLPRNKTESFETACMIEEDVVMHPP   |
| Q10944 | GSWLGEKFNRNAIYIRSSDYNRTLMSAQANMAGLPPPKYPI    |
| Q10944 | NMELKATWRIFDNLFCEKQNNITWPSWMNSSIFERVDQLYN    |
| Q10944 | RIFDNLFCEKQNNITWPSWMNSSIFERVDQLYNEVSQLEFH    |
| Q10944 | FYDIYPKYATCLLIEMHKLANETRLIRVFHKNETDIDRLIE    |
| Q10944 | LLIEMHKLANETRLIRVFHKNETDIDRLIEYSIPGCDDPCT    |
| P07219 | KSSSRKSHSKQDNTIGNEFGNLTERTDNSLNVLISSIEMKE    |
| P07219 | DDVFVI PAAYPVAIKATS NVNFTGFGINANNNNRNLAGKT   |
| P02853 | KSSSRKSLSKQDNTIGNEFGNLTERTDNSLNVLISSIEMEE    |
| P02853 | DDVFVI PAAYPVAIKATS NVNFTGFGINANNNNRNLAGKT   |
| O00092 | RYPTSSKSKYKLVTAIQANATDFKGF AFLKTYNYTLGA      |
| O00092 | TAIQANATDFKGF AFLKTYNYTLGADDLTPFGEQQLVNSG    |
| O00092 | GATNRAAPAI SVI IPESETFNNTLDHGVC TKFEASQLGDEV |
| O00092 | LDHGVC TKFEASQLGDEVAANFTALFAPDIRARA EKHLPGV  |
| O00092 | FTNELIARLTRSPVQDHTSTNSTLVSNPATFPLNATMYVDF    |
| O00092 | VQDHTSTNSTLVSNPATFPLNATMYVDFSHDMSMVSIFFAL    |

|        |                                             |
|--------|---------------------------------------------|
| O00092 | YVDFSHDNMVSIFFALGLYNGTEPLSRTSVESAKELDGYS    |
| P34752 | LLPLYLLSGVTSGLAVPASRNQSSCDTVDQGYQCFSETSHL   |
| P34752 | QCFSETSHLWQYAPFFSLANESVISPEVPAGCRVTFAQVL    |
| P34752 | RYPTDSKGGKYSALIEEIQQNATTFDGKYAFLKTYNYSLGA   |
| P34752 | EETQQNATTFDGKYAFLKTYNYSLGADDLTPFGEQELVNSG   |
| P34752 | AQPGQSSPKIDVVISEASSNNTLDPGTCTVFEDSELADTV    |
| P34752 | LDPGTCTVFEDSELADTVEANFTATFVPSIRQRENDLSGV    |
| P34752 | YANELIARLTHSPVHDDTSSNHTLDSSPATFPLNSTLYADF   |
| P34752 | VHDDTSSNHTLDSSPATFPLNSTLYADFSHDNGIISILFAL   |
| P34752 | YADFSHDNGIISILFALGLYNGTKPLSTTTVENITQTDGFS   |
| P34752 | ILFALGLYNGTKPLSTTTVENITQTDGFSSAWTVPFASRLY   |
| P34755 | SGYGRVIETARKFGEFFGYNSTNAALNIISESEVMGADS     |
| P34755 | YYCAGPGDKNMAAVGAVYANASLTLNQGPKAAGSLFFNF     |
| P34755 | TTTCNVASASYPQYLSFWWNYNTTTELNYRSSPIACQEGDAM  |
| Q92508 | LPPAGIWARVGLKDFVGTNCSSPHALVLNTGLDWPVYAS     |
| Q92508 | SGALWRISPPSRAQMKRELYNGTADITLRFWNFQRDLAKG    |
| P01833 | GCITLISSEGYVSSKYAGRANLTNFPENGTFFVNVIAQLSQD  |
| P01833 | SEGYVSSKYAGRANLTNFPENGTFFVNVIAQLSQDSDSGRYKC |
| P01833 | NSRGLSFDVSLEVSQGPGLLNDTKVYTVDLGRVTVINCPFK   |
| P01833 | YKQIGLYPVLVIDSSGYVNPNYTGRIRLDIQGTGQLLFSVV   |
| P01833 | SEGWVKAQYEGRLSLEEPGNGTFTVILNQLTSRDAGFYWC    |
| P01833 | WRTTVEIKIIEGEPNLKVPGNVTAVLGETLKVPCHPCKFS    |
| P01833 | KVPCHFPCKFSSYEKYWCKWNNNGCQALPSQDEGPKAFVN    |
| Q6PD26 | IEGAVQRFVQPFNLRLSVAGNFSVDSQILYYAMLGVNPRFD   |
| Q6PD26 | AFHSPRWGGIMVYVDPKIYNASELPVRVEVDMVRVMEVFL    |
| P01832 | GRCVTLASTGYTSQEYSGRGLTDFPDRGEFVVTVDQLTQN    |
| P01832 | KLTFPDRGEFVVTVDQLTQNDSSGYKCGVGVNGRGLDFGV    |
| P01832 | GEGLVQKDYTGRLALFEEPNGTFSVVLNQLTAEDEGFYWC    |
| Q8BXQ2 | FIDATNTVPTASFKPLGLANDDDYFLRYAVLPREVVCTE     |
| Q8BXQ2 | ACPLASQSLVYVDITGYSDNETLEVSPPPTSTYQDVI LGT   |
| Q8BXQ2 | VILGTRKTYAVYDLFDTAMINNSRNLNIQLKWKRPDNEAL    |
| Q969N2 | FIDSTNTVPTASFKPLGLANDTDHYFLRYAVLPREVVCTE    |
| Q969N2 | PCPLASESRVYVDITTYNQDNETLEVHPPPTTYQDVI LGT   |
| Q969N2 | VILGTRKTYAVYDLDDTAMINNSRNLNIQLKWKRPENEAP    |
| Q9UKJ1 | SFYSTRPPSIHKDYVNRFLFNWTEGQKSGFLRISNLQKQDQ   |
| P12273 | KYTAACDDNPKTFYWFYTNRTVQIAAVVDVIRELGICPD     |
| Q13563 | FWKFTEGSLLDGLYWKMQPSNQTEADNRSFIFYENLLGV     |
| Q13563 | GSLLDGLYWKMQPSNQTEADNRSFIFYENLLGVPRIRQLR    |
| Q13563 | FIFYENLLGVPRIRQLRVNRGSCSIPQDLRDEIKECYDVY    |
| Q13563 | KECYDVYSVSEDRAPFGPRNGTAWIYTSEKDLNGSSHGWI    |
| Q13563 | RAPFGPRNGTAWIYTSEKDLNGSSHGWIATYSGAGYYLDL    |

|        |                                              |
|--------|----------------------------------------------|
| Q9XWV2 | KTDEELCAKRLATAYFHDEVNQTGWAFLEVDVISPKIPHYL    |
| Q9XWV2 | LKWMEQEIRENPEDEYWQQVNLTVNQLFGLIHGYENQLGAE    |
| Q9XWV2 | KRDHNTVTDMSSMIALMRSNNYTKDPLSKCDCNPYSAENA     |
| Q9XWV2 | CNPPYSAENAIACRSDLNPLNGTYPFKSLGFRDHGAIDVKV    |
| Q9GL30 | EKTIQVKNVLDKRGDAYGFYNNVSKTTGWGILEIKAGYGSQ    |
| Q9GL30 | DDFYLLSSGLVLLQTTNSVYNKTLQHVVPQSLLAWQVRV      |
| Q9GL30 | YNSGTYNQYMVLDLKKVNLNHSLEDEGLYIVEQIPTVEY      |
| Q9GL30 | AVLRKGYWFSYNI PFHEKVIYNWSGYPIILVKKLGLDYSYDLA |
| Q9GL30 | YAI SGPTVQGGLPVFWRSFNKTLHEGMPEAYNFDFITMKP    |
| Q6P4A8 | EKTVQVKNVMDKNGDAYGFYNNVSKTTGWGILEIRAGYGSQ    |
| Q6P4A8 | DDFYILSSGLILLQTTNSVFNKTLKQVIPETLLSWQVRV      |
| Q6P4A8 | YNSGTYNQYMVLDLKKVNLNHSLEKGTLYIVEQIPTVEY      |
| Q6P4A8 | DVLRKGYWFSYNVPFHEKIYNWSGYPLLQKLGLDYSYDLA     |
| Q6P4A8 | YAI SGPTVQGGLPVFRWDRFNKTLHQGMPEVYNFDFITMKP   |
| Q8VCI0 | SKKVEIKTVLDKNGDAYGYNDSIKTTGWGILEIRAGYGSQ     |
| Q8VCI0 | DDFYILSSGLILLQTTNSVYNKTLKQVVPKTLAWQVRV       |
| Q8VCI0 | HNSGTYNQYMVLDLKKVTINRSLDKGTLYIVEQIPTVEY      |
| Q8VCI0 | NVLRKGYWASYNIPFHKT IYNWSGYPLLVKLGLDYSYDLA    |
| Q8VCI0 | YAI SGPTVQDGLPPFNWRFNETLHRGMPEVDFNFVTMKP     |
| O62146 | VLDGFDCRNQVAVARWQNAVNTGWTFLEVETKENYCPQLQ     |
| O62146 | LLSKTVLTYHLKNAQEDYCKNFTGYCSRLSDFLTENQKWIQ    |
| O62146 | KWIQSSLETVAPDDLYGAVNRTHQVSGLIDAYEGREFKP      |
| O62146 | LHPILYLNNGDFYDLEKLNKTRDPAFEQTGGKCSGLIKV      |
| O62146 | DDFALQTSGLAVIETTISVFNTSLFENTKPVGQLPTWIRAI    |
| O62146 | CNPPYSAEAGISARGDLN PANGTYEFPQGQGHVNHGALDYKG  |
| Q8NHP8 | VSAGQLMVDGRHPDAVAVANLTNAIRETGWAFLELGTSGQ     |
| Q8NHP8 | TNAIRETGWAFLELGTSGQYNDLQAYAAGVVEAAVSEELI     |
| Q8NHP8 | PLGFLLQLSGDLEDELEALNKTIKPSLGSWSCSALIKLL      |
| Q8NHP8 | ELYQKTYWASYNIPSFETVFNASGLQALVAQYGDWFSYDGS    |
| Q8NHP8 | AQYGDWFSYDGS PRAQIFRRNQSLVQDMSMVRMLRYNDFL    |
| Q8NHP8 | CNPQNGENAI SARSDLN PANGSYPFQALRQRSHGGIDVKV   |
| Q3TCN2 | AASGQLRLEDGFHPDAVAVANLTNAIRETGWAYLDLSTNGR    |
| Q3TCN2 | TNAIRETGWAYLDLSTNGRYNDSLQAYAAGVVEASVSEELI    |
| Q3TCN2 | PLGFLLQLISGDLEDELEPALNKTNTKPSLGSWSCSALIKLL   |
| Q3TCN2 | ELYKTTYWASYNIPYFETVFNASGLQALVAQYGDWFSYTKN    |
| Q3TCN2 | CNPKPNAENAI SARSDLN PANGSYPFQALHQRHGGIDVKV   |
| Q9BL07 | QILNDHSSAKFDYTYVSVCVNSTDETLLDIVYAKECKNAAS    |
| Q9BL07 | AKECKNAASRVALGKYSNQVNTGWGILEIETFASHSYDVQ     |
| Q9BL07 | ELTRLIQIYYHYRNTIETMCNNHTLFCRRLYIYLQQLDWMR    |
| Q9BL07 | DWMSQVQANPPTDPFWRQVNLTFQALGTGIYDAYSKRNLT     |
| Q9BL07 | LHPIYMMQLAGDMFDLNKLLNKTA DPM EYPEGGRCSGFVKL  |

|        |                                             |
|--------|---------------------------------------------|
| Q9BL07 | DDYTITSAGLTSIETTIAIFNQTLTYDKFMKPEGQVHCWIR   |
| Q9BL07 | KMRFRAGGPPYDPLPVFDWNHTNLNVRHFGQPDVWNFTY     |
| Q9BL07 | FRAWGPPYDPLPVFDWNHTNLNVRHFGQPDVWNFTYVDL     |
| Q9BL07 | FDWNHTNLNVRHFGQPDVWNFTYVDLEWQLAAQVQLTPYD    |
| Q8IV08 | CYDPCEAVLVESIPEGLDFPNASTGNPSTSQAWLGLLAGAH   |
| Q8IV08 | LLAGAHSSLDIASFYWTLTNDHTQEPSAQGGEEVLRQLQ     |
| Q63434 | CFLQVLAVLAVHSQGALSAGNNSTEMEVVFFNEVWGRSYCR   |
| Q63434 | FLQVLAVLAVHSQGALSAGNNSTEMEVVFFNEVWGRSYCRP   |
| Q63434 | SRCSGCCGDEGLHCVALKTANITMQILKIPPNRDPHSYVEM   |
| P21755 | FASVLERHNKAAAYLVVGD SANFTNWAAGQPNEADGTCVKAD |
| P82142 | FANVLERHNKEAYLVVGN SANFTNWAEGQPKKADGTCVKAD  |
| Q7LZI1 | GDIAYNIKGCISSCPELSLSNRTHEVDRNELIKVECTDAVK   |
| P21756 | FANVLERHNKAAAYLVVGD SANFTNWAAGQPNEADGTCVKAD |
| P06868 | AVTESGHTCQRWSEQTPHKHNRTPENFPCKNLEENYCRPN    |
| P00747 | AVTVSGHTCQHWSAQTPHHTNRTPENFPCKNLDENYCRNPD   |
| P06867 | SVTASGHTCQRWSAQSPHKHNRTPENFPCKNLEENYCRNPD   |
| Q9R0E2 | DSDQLFYTKIFLNPEKREQINISLDHRCRIFQNLGDALDEV   |
| Q9R0E2 | NDLWEVFSNPEDWKEKYIHENYTKALAGKLVETPCPDVYWF   |
| Q9R0E2 | IALNRVGEDYEGGGCRFLRYNC SVRAPRKGWALLHPGRLTH  |
| O00469 | TVATKESDGFHRFMQSAKYFN YTVKVLGQGEWRGGDGINS   |
| O00469 | DDQLFYTKVYIDPLKREAINITLDHKCKIFQTLNGAVDEV    |
| O00469 | NGCTLCEFDTVDL SAVDVHPNVSIGVFIEQPTPFLPRFLDI  |
| O00469 | VFFDKAKHEIKTIKIVGPEENLSQAEARNMGMDFCRQDEKC   |
| O00469 | VFMYISNRHEFGRLSTANYNTSHYNDLWQIFENPVDWKE     |
| O00469 | IALNNVGEDFQGGGCKFLRYNC SIESPRKGWSFMHPGRLTH  |
| Q9R0E1 | TVATAETEGYRRFLQSAEFFNYTVRTLGLGQEWRRGGDVART  |
| Q9R0E1 | NYLGNYPNGWTPQGGCGFCNQTLRTPGGQPPRVLAVF       |
| Q9R0E1 | PDLWQIFDNPVDWREQYIHENYSRALDGEGLVEQPCPDVYW   |
| Q20679 | IALNKKGRDYEGGGVRYIRYNCTVPADEVGYAMFPGRRLTH   |
| P72186 | PPIVEKDVKTKEPSLEPKMYNSTWVINALQFIQEFYDGGSG   |
| P72186 | WKDFDTEGFVDTSF SFSKVVNGTLIINTTFQVASGLTLNES  |
| P72186 | EGFVDTSF SFSKVVNGTLIINTTFQVASGLTLNESTGLMEY  |
| P72186 | VVNGTLIINTTFQVASGLTLNESTGLMEYVVKTVVVSNTVI   |
| P72186 | LTLNESTGLMEYVVKTVVVSNTVIGNITSANGIYHFGLLPE   |
| P72186 | STGLMEYVVKTVVVSNTVIGNITSANGIYHFGLLPERYFDL   |
| P72186 | RYFDLNFQDQEDFYVLLVNS TGNFYDIAYVDTDLDYDFT    |
| P72186 | AYVDTDLDYDFTDEVPLGQYNVYDVAVFSYYYGPLNVLA     |
| P72186 | LSMYSGEWEVFSRLYGWDYTNVTTDTVQGVAPGAQIMAIRV   |
| P72186 | EGDPYTGQKYTELDQGHGLVNVTKSWEILKAINGTTLPIVD   |
| P72186 | LDQGHGLVNVTKSWEILKAINGTTLPIVDHWADKSYSDFAE   |
| P72186 | EIYATEPWIKPFVSGSVILENNTEFVLRVKYDVEGLEPGLY   |

|        |                                             |
|--------|---------------------------------------------|
| P72186 | VIEDEILNTIUIPEKFTPENNYTLTWYDINGPEMVTHHFFT   |
| P72186 | ESGFLVRIYGVIEITPSVWYINRTYLDNTNTEFSIEFNITNIY |
| P72186 | SVWYINRTYLDNTNTEFSIEFNITNIYAPINATLIPIGLGTY  |
| P72186 | LDNTNTEFSIEFNITNIYAPINATLIPIGLGTYNASVESVGD  |
| P72186 | ITNIYAPINATLIPIGLGTYNASVESVGDGEFFIKGIEVPE   |
| P72186 | QMTLDNGNIKLDKDSIILGSNESVVVTANITIDRDHPTGVY   |
| P72186 | IKLDKDSIILGSNESVVVTANITIDRDHPTGVYSGIEIRD    |
| P72186 | PTGVYSGIEIRDNEVYQDTNTSIAKIPITLVIDKADFAVG    |
| P72186 | DKADFAVGLTPAEGLVGEARNYTLIVKHALTLEVPVNATVI   |
| P72186 | GEARNYTLIVKHALTLEVPVNATVIIGNYTYLTDENGTVTF   |
| P72186 | LIVKHALTLEVPVNATVIIGNYTYLTDENGTVTFYAPTCL    |
| P72186 | LEVPVNATVIIGNYTYLTDENGTVTFYAPTCLGSDEITVI    |
| P72186 | PEITEEDINEPKLAMSSPEANATIVSVEMESEGGVKKTVTV   |
| P72186 | SVEMESEGGVKKTVTVEITINGTANETATIVVPVPKKAENI   |
| P72186 | ESEGGVKKTVTVEITINGTANETATIVVPVPKKAENIEVSG   |
| P72186 | RLYSQKFDELYQKALELGVNETLALALSHEKAKYEEKA      |
| P55058 | QELETITIPDLRGKEGHFYINI SEVKVTELQTSSELDQFP   |
| P55058 | QTSSELDQFPQELMLQITNASLGLRFRRLLYWFFYDGG      |
| P55058 | LGLRFRRLLYWFFYDGGYINASAEGVSIRTGLELSRDPAG    |
| P55058 | VSI RTGLELSRDPAGRMKVS NVSCQASVSRMHAAFGGTFKK |
| P55058 | ASTSNLMDMDFRGAFFPLTERNWSLPNRAVEPQLQEEERMVY  |
| P55058 | ALRGKALRTQLDLRRFRIYSNHSALSLALIPLQAPLKTML    |
| P55065 | QELETITIPDVYGAKGHFYINISDVRVTQLHLISSELHFQFP  |
| P55065 | TQLHLISSELHFQPDQDLLNISNASLGLHFRRLLYWFLY     |
| P55065 | HLISSELHFQPDQDLLNISNASLGLHFRRLLYWFLYDGG     |
| P55065 | LGLHFRRLLYWFLYDGGYINASAEGVSIRTGLQLSQDSSG    |
| P55065 | VSI RTGLQLSQDSSGRIKVS NVSCEASVSKMMAFGGTFRR  |
| P55065 | VSNGLDMEFRGAFFPLKEDNWSLPNRAVEPQLEDDERMVY    |
| P55065 | TLRGKALRVKLDLRRFQIYSNQSALESALIPLQAPLKTLL    |
| Q9UIW2 | HEQTGEVYVGAVNRIYKLSGNLTLRAHVTPVEDNEKCYP     |
| Q9UIW2 | LYLKSKEGKKFASVDFVFNCSVHQSLSCVNGSFPCHWC      |
| Q9UIW2 | ASVDFVFNCSVHQSLSCVNGSFPCHWCKYRHVCTHNVAAD    |
| Q9UIW2 | KYRHVCTHNVAADCAFLEGRVNVSEDCPQILPSTQIYVPGV   |
| Q9UIW2 | SAPIIININRAQLTNPEVKYNYTEDPTILRIDPEWSINSGG   |
| Q9UIW2 | SPLIILKGRNLLPPAPGNSRLNYTVLIGSTPCTLTVSETQLL  |
| Q9UIW2 | IGSTPCTLTVSETQLLCEAPNLGQHKVTVRAGGFESPGT     |
| P70206 | HEQTGEVYVGAVNRIYKLSGNLTLRAHVTPVEDNEKCYP     |
| P70206 | LYLKSKEGKKFASVDFVFNCSVHQSLACVNGSFPCHWC      |
| P70206 | ASVDFVFNCSVHQSLACVNGSFPCHWCKYRHVCTNNAAD     |
| P70206 | KYRHVCTNNAADCAFLEGRVNMSEDCPQILPSTHIYVPGV    |
| P70206 | SAPIVININRAQLSNPEVKYNYTEDPTILRIDPEWSINSGG   |

|        |                                             |
|--------|---------------------------------------------|
| P70206 | SPLIILKGRNLLPPAPGNSRLNYTVLIGSTPCILTVSETQLL  |
| P70206 | IGSTPCILTVSETQLLCEAPNLGQHKVTVRAGGFESFGM     |
| O75051 | HQGTGAVYVGAINRVYKLTGNLTIQVAHKTGFEEENKSCYP   |
| O75051 | YKLTGNLTIQVAHKTGFEEENKSCYPPLIVQPCSEVLTLTN   |
| O75051 | YRLLQAAYLAKPGDSLAAQAFNITSQDDVLFATFSKGQKQYH  |
| O75051 | LSLVVSDAPDLSAGIACAFGNLVEVEGQVSGSQVICISFGP   |
| O75051 | KYRNLCETHDPTTCSFQEGRINISEDCPQLVPTEEILIPVGE  |
| O75051 | GYEVLNIQGAHRVPALRFNSSVQCQNSSYQYDGMDSN       |
| O75051 | IGETPCAVTVSETQLLCEPPNLGQHKVMVHVGGMVFSFGS    |
| P70207 | HRRTGAVYVGAINRVYKLTGNLTIQVAHKTGFEEENKACYP   |
| P70207 | DDLFILVEPSHKKEHYLSVKNKTGMTYGVIVRSEGEDGKLF   |
| P70207 | YRLLQAAYLAKPGEALAAQAFNISSEDEDVLFATFSKGQKQYH |
| P70207 | LSLVVNDAPNLSEGIACAFGNLVEVEGQVSGSQVICISFGP   |
| P70207 | KYRNLCETHDPTTCSFQEGRINVSEDCPQLVPTEEILIPVGE  |
| P70207 | GYEVLNIQGAHVHRVPALRFNSSVQCQNSSYQYDGMDSN     |
| P70207 | SPIILKGNLCPASGGAKLNYTMIGETPCTVTVSETQLL      |
| P70207 | IGETPCTVTVSETQLLCEPPNLGQHKVMVHVGGMVFSFGS    |
| O15031 | KRLVECGSLFKGICALRALSNI SLRLFYEDGSGEKS FVASN |
| O15031 | FEDGPFYVFFVFNQDKHPARNRTL LARMCREDPNYSYLEM   |
| O15031 | YPLGSRDGLRGTA VLQRGGLNLTAVTVAENNHTVAFLGTS   |
| O15031 | TAVLQRGGLNLTAVTVAENNHTVAFLGTS DGRILKVYLT P  |
| O15031 | SHWLWSRSKSCVAVTSAQPNMSRRAQGEVQLTVSPLPALS    |
| O15031 | VTMQESGTFAFRTPKLSHDANETLPLHLYVKS YGKNIDSKL  |
| O15031 | HLYVKS YGKNIDSKLHVTLYNCSFGRSDCSLCRAANPDYRC  |
| O15031 | PDYRCAWCGGQSRVYEA LCSNTTSECPPPVITRIQPETGPL  |
| O15031 | LGSNLGVQAGDIQRISVAGRNCSFQPERYSVSTRIVCVIEA   |
| O15031 | NPVLRAFEPLRSFASGGRSINVTGQGFSLIQRFAMVVI AEP  |
| O15031 | PREAESLQPMTVVGTDYVFHNDTKVVFLSPAVPEEPEAYNL   |
| O15031 | HNDTKVVFLSPAVPEEPEAYNLTVLIEMDGHRLLRTEAGA    |
| O15031 | RALLRTEAGAFYVDPDPTFENFTGGVKKQVNKLIHARGTNL   |
| B2RXS4 | KRLVECGSLFKGICALRAMSNI SVRLFYEDGSGEKS FVASN |
| B2RXS4 | FEDDFYVFFVFNHQDKHPAKNRTL LARMCKDDPSYYSVEM   |
| B2RXS4 | YPLGSRDGLVATAVLRGGLNLTAVTVAENDHTVAFLGTS     |
| B2RXS4 | YGSIPVDINKKIKQDLALSGNLSSLYAMTQDKVFRLPVQEC   |
| B2RXS4 | AYRCWCRGQNRVYEA LCSNVTSECPPPVITRIQPETGPL    |
| B2RXS4 | QPLSVEPRQGPQAGGTTLTINGTHLDTGSKEDVRVTLNDVP   |
| B2RXS4 | RREAGALERVTVEGMEYVFYNDTKVVFLSPAVPEEPEAYNL   |
| B2RXS4 | YNDTKVVFLSPAVPEEPEAYNLTVLIRMDGHCAPLRTEAGV   |
| O43157 | ALWAGWVLTQLPPTAFTPNGTYLQHLARDPTSCTLYLGA     |
| O43157 | GASGASALCAFFLDEVDRLANRTRDACYTREGRAEDGTEVA   |
| O43157 | WLWSFQPELGCLQVAAMPANISREETREVFLSVPDLPPLW    |

|        |                                            |
|--------|--------------------------------------------|
| 043157 | KVHSIFPARGPRAGGTRLTLNGSKLLTGRLEDIRVVVDQP   |
| 043157 | WFGATERRLQRGQFKYTLDPNITSAGPTKSFSLGGREICVR  |
| 043157 | TACSLGPCSQQFEPECHVNSSQLITCRTPALPLPEDPW     |
| 060486 | DQLDYSLEHLSRLYRDQAGNCTEPVSLAPPARPRGSSFS    |
| 060486 | GLLLTGWTFDRGACEVRPLGNLSRNSLRNGTEVVVSHPPQGS |
| 060486 | FDRGACEVRPLGNLSRNSLRNGTEVVVSHPPQGSTAGVVYRA |
| 060486 | GRLKLCGAGSLHFVDAFLWNGSIYFPYYPYNYTSGAATGW   |
| 060486 | LHFVDAFLWNGSIYFPYYPYNYTSGAATGWPSMARIAQSTE  |
| 060486 | IASSTLIHSDLTSVYGTVMNRTVLFGLTGDGQLLKVILGE   |
| 060486 | RTVFLGLTGDGQLLKVILGENLTSNCPYIYEIKEETPVFY   |
| 060486 | SPRHSKCMVKNVDSRELCQNKSQPNRTCTCSIPTRATYKD   |
| 060486 | TRATYKDVSVVVMFSGSWNSDRFNFTNCSLKECPACV      |
| 060486 | QCPVAVEKTSGGGRPKENKGNRTNQLQVFYIKSEPKQVS    |
| 060486 | VSTLGSNVIVTGANFTRASNITMILKGTSTCDKDVIVSH    |
| 060486 | IALPHCSLIFPATTWISGGQNTMMGRNFVDIIDLIIISHEL  |
| 060486 | GRNFVDIDLIIISHELKGNINVSEYCVATYCGFLAPSLKSS  |
| 060486 | CVATYCGFLAPSLKSSKVRTNVTKLRVQDQTYLDCGTLQYR  |
| 060486 | VESEVDTELEVKIQKENDNFNISKDIEITLPHGQNGQLNC   |
| 060486 | FNISKDIEITLPHGQNGQLNCSFNITRNQDLTILCKIK     |
| Q8CJH3 | VFWAGCVVTLRSPLPAAFTANGTHLQHLARDPTTGTLYVGA  |
| Q8CJH3 | FLFQLSPGLQLEAVVSTGPNVDSRDLPPVIPDECPQAQPT   |
| Q8CJH3 | GASGTSVLCAPFLDEVDQLANYTRDACYTREGRAENGTKVA  |
| Q8CJH3 | VDQLANYTRDACYTREGRAENGTKVADIAYDVLSDCAQLPV  |
| Q8CJH3 | WLWSFQPELGCLRVAVSPANISREERREVFSLVPGPLSLW   |
| Q8CJH3 | LFGATERRLQHGQFKYTSDPNVTSVGPSSFFSGGREIWR    |
| Q8CJH3 | QGLAQKHVVPEKFEEPLVNSHLLMCRTPALPGPPWDSG     |
| Q9Y4D7 | GAAGTVYLAAVNRLYQLSGANLSLEAAVAVGVPDPSPLCHA  |
| Q9Y4D7 | GLVVVCGSIYQGFCQLRRRGNISAVAVRPPAAPPAEPVTV   |
| Q9Y4D7 | PPAEPVTVFPSMLNVAANHPNASTVGLVLPAAAGAGGSRL   |
| Q9Y4D7 | GSRLLVGATYTYGYSFFFRNRSLEDHRFENTPEIAIRSLD   |
| Q9Y4D7 | KATPVFRAPGLTSVAVASVNNYAVFLGTVNGRLLKINLNE   |
| Q9Y4D7 | NNYAVFLGTVNGRLLKINLNEVSMQVSRVVTVAYGEFVH    |
| Q9Y4D7 | DAYCGWCALETRCTLQQDCTNSQQHFWTSAEGPSPRCAM    |
| Q9Y4D7 | QDHVTVEMSVRVNGRNIVKANFTIYDCSRTAQVYPHTACTS  |
| Q9Y4D7 | SCLSAQWPCFWCSQQHSCVSNQSRCEASPNPTSPQDCPRTL  |
| Q9Y4D7 | QGAALECSFGLLEIFEAVVWNEVVRCDQVVLHTTRKSQVF   |
| Q9Y4D7 | EEIVCVTGFAPGPLSGVTVNASKEGKSRDRFSYVLPVHS    |
| Q9Y4D7 | TRITIHGNDLHVGSSELQVLVNDTDPCTELMRTDTSIACTMP |
| Q9Y4D7 | ALPAPVPVCFERRGCVHGNLTFWYMQNPVITATISPRRSP   |
| Q9Y4D7 | SPVSGGRTITVAGERFHMVQNVSMVHHIGREPTLCKVLNS   |
| Q9Y4D7 | QNVSMVHHIGREPTLCKVLNSTLITCPSPGALSNASAPVD   |



|        |                                             |
|--------|---------------------------------------------|
| Q9Y4D7 | TLCKVLNSTLITCPSPGALSNASAPVDFFINGRAYADEVAV   |
| Q9Y4D7 | IGQVSCDIQIVSDRIIHCSVNESLGAAVGQLPITIQVGNFN   |
| Q9Y4D7 | NESLGAAVGQLPITIQVGNFNQTIATLQLGGSETAIIVSIV   |
| P18632 | IIHGLYLYGCSTSVLGNVLINESFGVEPVHPQDGDALTLRT   |
| P18632 | GDALTLRTATNIWIDHNSFSNSDGLVDVTLTSTGVTTISNN   |
| P18632 | AIGGSSNPTILSEGENSFTAPNESYKKQVTIRIGCKTSSSCS  |
| P83947 | ELMDLSKERVVDSISILFHQNLTTTSHEDLHVWLSGVLTNH   |
| P83947 | IDAYQDTLYPHNYRQFYRDRNITGTVDVDFIGNAAVVFQNCN  |
| P85076 | KKKTNLMFIGDGIGKTWIKGNRSVVDGWTTFRSTVAVVGT    |
| P85076 | GDFALTTLYYREYKNTGPGSNTTARVTWPGYAVTTNETEVI   |
| P85076 | TGPGSNTTARVTWPGYAVTTNETEVIQFTVGNFIQGSQWLT   |
| P07738 | CSWVDQKLNSEGMEEARNCQKQKALNFEFDLVFTSVLNRS    |
| P07738 | DRRYKVCVPLDQLPRSESLKDVLERLLPYWNERIAPEVLR    |
| P07738 | VLRGKTLISAHGNSSRALLKHLEGISDEDIINITLPTGVP    |
| Q9TQ23 | VSTIVSQMMVGNHATDLWQNCSTSLMGSVQHCFSSSANEW    |
| Q8TEM1 | AAAKLNIPKVLPPFTRATRNVNFTLEASEGCRYWLSRPEVA   |
| Q8TEM1 | QSSLVLGHRSIHQGASRLPNSIIYVVEPGYLGFTVHPGDR    |
| Q8TEM1 | NIRIETVLPAAEFFEVLSSSQNGSYHRIRALKRQQTAI DAAL |
| Q8TEM1 | PWQPKTGAYQYTI RAHGGSGNFSWSSSHLVATVTVKGVMT   |
| Q8TEM1 | EMLFEGGPRPWILEPSKFFQNVTAEDTDSIGLALFAPHSSR   |
| Q8TEM1 | SHRNPRDLAAYDQEGRRFDNFSSLSIQWESTRPVLASIEP    |
| Q8TEM1 | NHPGIQAELRIREGSGYFFLNTSTADVVKVAYQEARGVAMV   |
| Q8TEM1 | LKLRAASPIITLVALDEALDNYTITFLIRGVAIGQTSLTAS   |
| Q8TEM1 | MQVTSEGGPQPQSNILFISISNESVALVSAAGLVQGLAIGNG  |
| Q8TEM1 | SNESVALVSAAGLVQGLAIGNGTVSGLVQAVDAETGKVVII   |
| Q8TEM1 | SGSMIGTSTIEVIAQEPPGANQTTIVAVKVPVSYLRVMS     |
| Q8TEM1 | SVLNFATNRDDFVQIGKGFNTNNTCVVRTVSVGLTLLRVWDA  |
| Q7Z5L7 | RSVYLHNNKLADAGLPDNMFGSSNVEVLIILSSNFLRHVPK   |
| Q7Z5L7 | LSSLRELYLQNNYLTDEGLDNETFWKLSLEYLDLSSNNLS    |
| Q7Z5L7 | LDNETFWKLSLEYLDLSSNNLSRVPAGLPRSLVLLHLEKN    |
| Q7Z5L7 | NQITGIGREDFATTYFLEELNLSYNRITSPQVHRDAFRKLR   |
| Q52S86 | EKVSTNPTIATSDSKGIPDLNKSILPSATNSMKPDTPTVTQT  |
| Q52S86 | SITPALTSIITPTSPPRQPSANSTTLKPPESSES PDKSHTA  |
| Q52S86 | GDDRICKCESPGRLTDKMLLLNLTRSGLCAGNNSDDKLI TLL |
| Q52S86 | GRLTDKMLLLNLTRSGLCAGNNSDDKLI TLLCRAAKATFNP  |
| P29150 | KMTVQSTIPSGSYADVYNARNMTRVFRPQSVQGS LAEAQF   |
| P14340 | ITYKCPFLKQNEPEDIDWCNSTSTWVTYGCTTTTGEHRRE    |
| P14340 | ETEARQPATLRKYCIEAKLTNTTTDSRCPTQGEPSLNEEQD   |
| P14340 | ENLEYTIVITPHSGEEHAVGNDTGKHGKEIKITPQSSITEA   |
| P14340 | AIKDNRAVHADMGYWIESALNDTWKIEKASFIEVKSCHWPK   |
| P14340 | WTLYAVATTFVTPMLRHSIENS SVNVSLTAIANQATVLMGL  |

|        |                                             |
|--------|---------------------------------------------|
| P14340 | AVATTFVTPMLRHSIENSSVNVSLTAIANQATVLMGLGKGW   |
| P14340 | LTLATGPITLWEGNPGRFWNTTIAVSMANIFRGSYLAGAG    |
| P09866 | VTYKCPLLVNTPEPIDDCWCNLTSTWVMYGTCTQSGERRRE   |
| P09866 | KTTAKEVALLRITYCIEASISNITTATRCPTQGEPLYKKEEQD |
| P09866 | ENLEYTVVVTVHNGDTHAVGNDTSNHGVTAMITPRSPSVEV   |
| P09866 | DLKYSWKTWKGAKIFTPEARNSTFLIDGPDTPSECPNERRAW  |
| P09866 | AIKDQKAVHADMGYWIESSKNQWQIEKASLIEVKTCLWPK    |
| P09866 | WTLYAVATTILTPLMRHTIENTSANLSLAAIANQAAVLMGL   |
| P09866 | AVATTILTPLMRHTIENTSANLSLAAIANQAAVLMGLGKGW   |
| P09866 | LTLATGPILTTLWEGNPGRFWNTTIAVSTANIFRGSYLAGAG  |
| P05769 | IGFAAALKLSTFQGKIMMTVNATDIADVIAIPTPKGPNQCW   |
| P05769 | DIKYEVGVFVHGSTDSTSHGNYSTQIGANQAVRFTISPNAP   |
| P05769 | ELDIGWKAWGKSLFAAELANSTFVVDGPETAECPNKRAW     |
| P05769 | IEDFGGITSTRGWLKLREENTSECDSTIIGTAVKGNHAVH    |
| P05769 | AVKGNHAVHSDLSYWIESGLNGTWKLERAI FGEVKSCWTPE  |
| P05769 | TTIREAGILCTAAALTLWDNNSAAWNSTTATGLCHVMRGS    |
| P05769 | GILCTAAALTLWDNNSAAWNSTTATGLCHVMRGSWIAGAS    |
| P07720 | DGTTVIRAEGKDAATQVRVENGTVCVILATDMGSWCDDSLTY  |
| P07720 | ANKIVYTVKVEPHTGDYVAANETHSGRKTASFTVSSERTIL   |
| P07720 | MAMWRSSATELNALVEGDANLTVVVDKLDPTDYRGGIFSL    |
| P07720 | AVKNGMAVHTDQSLWMKSVRNDTGTYIVELLVTDLRNCSWP   |
| P07720 | KSVRNDTGTYIVELLVTDLRNCSWPASHTIDNAEVVDSELF   |
| P08563 | DVSC EGLGAWVPTAPCARIWNQTQRACTFWAVNAYSSGGYA  |
| P08563 | VKFHTETRTVWQLSVAGVSCNVTEHPFCNTPHGQLEVQVP    |
| P08563 | HGQLEVQVPPDPGDLVEYIMNYTGNQQSRWGLGSPNCHGPD   |
| P03315 | TPEGSEEWSAPLITAMCVLANATPCFQPPCVCCYENNAE     |
| P03315 | EDNVDRPGYYDLLQAALTCRNGTRHRRSVSQHFNVYKATRP   |
| P03315 | LLSQSGNVKITVGGKKVKYNCTCGTGNVGTNSDMTINTC     |
| P03315 | VPRADEPARKGKVHIFPPLDNIICRVPMAREPTVIHGKREV   |
| P03315 | AYKAHTASLKAKVRVMYGNVNTQTVDVYVNGDHAVTIGGTQF  |
| Q9Y6A1 | HDVAAPLSPHSQEVSCYIDYNSMPAQNLWRLEIVNRGSDT    |
| Q9Y6A1 | RGSDTDVWKTILSEVRFVHVNTSAVLKLSGAHLPDWGYRQL   |
| Q9Y6A1 | QEQRERERELHSPAQVDVSRNLSFMARFSELQWRMLALRSD   |
| P27169 | YYSPSEVRVVAEGFDFANGINISPDGKYVYIAELLAHKIHV   |
| P27169 | KYVYIAELLAHKIHVYEKHANWTLTPLKSLDFNTLVDNISV   |
| P27169 | KHANWTLTPLKSLDFNTLVDNISVDPETGDLVVGCHPNGMK   |
| P27169 | VLRIQNILTEEPKVTQVYAENGTVLQGSTVASVYKGLLIG    |
| P52430 | KYVYIAELLAHKIHVYEKHANWTLTPLKVLNFDTLVDNISV   |
| P52430 | KHANWTLTPLKVLNFDTLVDNISVDPVETGDLVVGCHPNGMR  |
| P52430 | VLRIQNILSEDPKITVVYAENGTVLQGSTVASVYKGLLIG    |
| Q15165 | IYVADILAHEIHVLEKHTNMNLTQLKVLELDTLVDNLSIDP   |

|        |                                            |
|--------|--------------------------------------------|
| Q15165 | KHTNMNLTQLKVLELDTLVDNLSIDPSSGDIWVGCHPNGQK  |
| Q15165 | VLRIQNILCEKPTVTTVYANNGSVLQSSVASVYDGKLLIG   |
| Q15166 | LLGVGLSLVGEMFLAFRERVNASREVEPVEPENCHLIEELE  |
| Q15166 | KHDNWDLTQLKVIQLGTLVDNLTVPATGDILAGCHPNPMK   |
| Q15166 | VLRIQNVLSEKPRVSTVYANNGSVLQGTSVASVYHGKILIG  |
| Q15063 | PGVTNLIKTTQGSKIFLKEVNDTLLVNELKSKESDIMTNG   |
| P13686 | DRSLRKVPWYVLAGNHDHLGNVSAQIAYSKISKRWNFPSPF  |
| P13686 | SKRWNFPSFFYRLHFKIPQTNVSVAI FMLDVTTLCGNSDDF |
| P29288 | DRALRNIPWYVLAGNHDHLGNVSAQIAYSKISKRWNFPSPY  |
| P29288 | SKRWNFPSFYRLRFKVPRSNITVAIFMLDVTMLCGNSDDF   |
| P09889 | DPSLRNVPWHVLAGNHDHLGNVSAQIAYSKISKRWNFPSPY  |
| P09889 | SKRWNFPSFYRLRFKIPRSNVSVAIFMLDVTTLCGNSDDF   |
| P80366 | SEKNRKRRIAKGKMSTYRFFNYSSGFIHHTTIRKLYNTKY   |
| P80366 | HTTIRKLYNTKYVEVGLRNTTRRFSFITPPQTLGDVPTY    |
| P80366 | GLDVPYTFGLIGDLGQSFDSNTTLSHYELSPKKGQTVLFGV  |
| P80366 | AYQPWIWTAGNHEIEFAPEINETEFPKPFYRYHVPYEASQ   |
| P80366 | QPEYSAFREASFGHGMFDIKNRTHAHFSWNRNQDGVAVEAD  |
| P11117 | GMLQHWELGQALRQRYHGFLNTSYHRQEVYRSTDFDRITLM  |
| P11117 | SAEANLAGLFPNGMQRFNPNI SWQIPVHTVPI TEDRLK   |
| P11117 | TEDRLKFLGFCPRYEQLNETRQTPEYQNESSRNAQFLD     |
| P11117 | GPCPRYEQLNETRQTPEYQNESSRNAQFLDMVANETGLTD   |
| P11117 | QTPEYQNESSRNAQFLDMVANETGLDITLLETVWNVYDTLF  |
| P11117 | YQQA EKARLQGGVLLAQIRKNLTLMATTSQLPKLLVYSAHD |
| P11117 | GEQAPYASCHIFELYQEDSGNFSVEMYFRNESDKAPWPLSL  |
| P11117 | HIFELYQEDSGNFSVEMYFRNESDKAPWPLSLPGCPHRCPL  |
| P15309 | GMEQHVELGEYIRKRYRFLNESYKHEQVYIRSTDVRTLM    |
| P15309 | QDLFGIWSKVYDPLYCESVHNFTLPSWATEDMTKRELSE    |
| P15309 | CHLTELYFEKGEYFVEMYRNETQHEPYPLMLPGCSPSCPL   |
| P20646 | GMGQHVELGSYIRRYRGRFLNNSYKHDQVYIRSTDVRTLM   |
| P20646 | QDLFEIWSRLYDPLYCESVHNFTFRTWATEDAMTKKELSE   |
| P20646 | CHIMELYQDNGGTFVEMYRNETQNEPYPLTLPGCTHSCPL   |
| P15693 | GVKANYKTIGVSAARFNQCNSTFGNEVFSVMHRACKAGKS   |
| P15693 | AVTRLMGLFEPTEMKYDVNRNASADPSLAEMTEVAVRLLSR  |
| P15693 | YTSIILYGNPGYVLSNGNRPNVTDAESGDVNYKQQA VPLS  |
| P09242 | GVKANEGTVGVSAAATERTRCNTTQGNEVTSILRWAKDAGKS |
| P09242 | HNIKIDIVIMGGGRKMYPKNRTDVEYELDEKARGTRLDGL   |
| P09242 | DLISIWKSFKPRKHSHYVWNRTELLALDPSRVDYLLGLFE   |
| P09242 | VDYLLGLFEPGDMQYELNRNNTDPSLSEMVEVALRIILTKN  |
| P09242 | FTAILYGNPGYKVVVDGERENVSMVDYAHNNYQAQSAVFLR  |
| P09242 | PGYKVVVDGERENVSMVDYAHNNYQAQSAVPLRHETHGGEDV |
| P05187 | GVKGNFQTI GLSAAARFNQCNTTRGNEVISVMNRACKAGKS |

|        |                                            |
|--------|--------------------------------------------|
| P05187 | DGKNLVQEWLAKRQGARYVWNRTELMQASLDPSVTHLMGLF  |
| P05186 | GVKANEGTVGVSAAATERSRCNTTQGNEVTSILRWAKDAGKS |
| P05186 | HNIRDIDVIMGGGRKMYPKNKT DVEYESDEKARGTRLDGL  |
| P05186 | DLVDTWKSFKPRYKHSFIWNRELLTLDPHNVLYLGLFE     |
| P05186 | VDYLLGLFEPGDMQYELNRNNVTDPSLSEMVVVAIQILRKN  |
| P05186 | FTAILYGNPGYKVVGGGERENVSMVDYAHNNYQAQSAVPLR  |
| P83456 | GVKANEGTVGVSAAAVRSQANTTQGNEVTSILRWAKDAGKS  |
| P83456 | ENIPDIDVIMGGGRKMYPKNKT DVEYEPGQPKHSGTRKDGR |
| P83456 | FTAILYGNPGYKLVNGARENVTVDYQDNSYLAQAAVPLS    |
| P11491 | GWQYVGDRCNFDSSLKSHGENVTLPFLGLFADNDIPFEIDR  |
| P11491 | TSRQVTASYPQYVWYVQVLANATHSGEFLKRKLVDFVHEHK  |
| P10619 | YLES PAGVGFYSYDDKFYATNDTEVAQSNFEALQDFRFLFP |
| P10619 | MWHQALLRSGDKVRMDPPCTNTTAASTYLNNPYVRKALNIP  |
| P16675 | YIES PAGVGFYSYDDKMYVTNDTEVAENNYEALKDFRFLFP |
| P16675 | RFPEALMRSGDKVRLDPPCTNTTAPSNYLNNPYVRKALHIP  |
| 076840 | GATNIKIQEARKSTNNLALKNGSDHFYLNGLI QVEKEVE   |
| 076840 | LYCIDGKNKGRVEDDLCEENNAKPEFEKSCETVDCEAEWF   |
| 076840 | RVVYCHQVFANGRRVTVE DGNCTVERPPVKQTCNRFACPEW |
| 076840 | LGPCEGLTFVTGEWNLCTRCNDTEETREVTCKDSQGRAYPL  |
| 076840 | EVTCKDSQGRAYPLEKCLVDNSTE IPTDTRSCATQPPCEYE |
| 076840 | GGLEVVDGHCQAEKPEGKTNCTNEEKCTGTWYTSWSECT    |
| 076840 | DCNVDDCPTCVDSEFGCCPDNSTFATGEFNGFCSNCSETEF  |
| 076840 | FGCCPDNSTFATGEFNGFCSNCSETEFGCCADNVTVATGPN  |
| 076840 | GEFNGFCSNCSETEFGCCADNVTVATGPNKGC EEFVESPL  |
| 076840 | VECATIAPITALLGDGELIGND TDASNETHCSKTEFGCCP  |
| 076840 | APITALLGDGELIGND TDASNETHCSKTEFGCCPDWYTAA  |
| 076840 | YTAASGKNEGCPSTLGGCNETQFGCCHDDVTLARGANLE    |
| 076840 | PCELSDFGCCPDGETAALGKNGTGCGENCLTTKFGCCPDGK  |
| 076840 | TTTTPPFLMGGTVAPHKIAACNQTESGTVCGAGYKLAWHYD  |
| 076840 | NAFSSKADCESLCRVETLWSNNTDFCTLERSAGPCTDSISM  |
| 076840 | SESERVQLTSASTPVIYIVNKTAIFVGN TFRIRCNSYGV L |
| 076840 | VIKRLPGHRTTSRPLTPSKNFS LGTPPTSPSTVSTTFFR   |
| 076840 | SAPSDARVSRPTSNSCMDVGNASTCDLIVKNGLCGKKRYGT  |
| Q86829 | GATNIRIEETVPSSNYLACRNHSGHYLLNGDWRIDFPRPMF  |
| Q86829 | LTCSGPISLSLFI VMLVQEKNISLDYEYSIPELSHSQODT  |
| Q86829 | HWVEGEWSKCSKGCSDGFQNRSITCERISSSGEHTVEEDA   |
| Q86829 | GKCSKPCGGGERVREVLCLSNGTKSVNCDEEKVEPLSEKCN  |
| Q86829 | EASASESTDVSGASDSTGSTNASDSTPESSTEASSSTD DST |
| Q86829 | TPESSTEASSSTD DSTSDNSNVSESSTEASSSVSDSN     |
| Q86829 | SSTEASSSTD DSTSDNSNVSESSTEASSSVSDSN DSS    |
| Q86829 | VSDSNSSD GSTDGVSTTENS SDSTSDATSDSTASSDST D |



|        |                                             |
|--------|---------------------------------------------|
| P10163 | QSOGPPPHPGKPEGPPPEGNGKRSRSRSPPGKPPQGG       |
| P51888 | IHYLYLQNNFITELPVESFQNTGLRWINLDNNRIRKIDQR    |
| P51888 | AFIRLNYNKLTDRGLPKNSFNISNLLVLHLSHNRISVFAI    |
| P51888 | HNRISSVPAINNREHLYLNNNSIEKINGTQICPNDLVAFH    |
| P51888 | PAINNREHLYLNNNSIEKINGTQICPNDLVAFHDFSSDLE    |
| P13727 | DASKKDGAVESISVPMVDKNLTCPEEEDTVKVVGI PGQCT   |
| Q92954 | KNSAANRELQKKLKVKDNKKNRTKKKPTPKPPVVDEAGSGL   |
| Q92954 | LSDETNICNGKPVGLTTLRNGTLVAFRGHYFWMLSPFSPP    |
| Q86XR5 | PLPPPPPPPPRLSAPAPNSTSCPTTEESWWSGLVIIAV      |
| P04156 | VYYRPMDEYSNQNNFVHDCVNIITIKQHTVTTTTKGENFTET  |
| P04156 | HDCVNIITIKQHTVTTTTKGENFTE TDVKMMERVVQMCITQ  |
| P04273 | VYYRPVDQYNNQNNFVHDCVNIITIKQHTVTTTTKGENFTET  |
| P04273 | HDCVNIITIKQHTVTTTTKGENFTE TDIKIMERVVEQMCCTQ |
| P04925 | VYYRPVDQYSNQNNFVHDCVNIITIKQHTVTTTTKGENFTET  |
| P04925 | HDCVNIITIKQHTVTTTTKGENFTE TDVKMMERVVQMCVTQ  |
| P55751 | FDERYAQGRGFITKAVNGCHNASLTPEDKEQAQIHHEDL     |
| P55753 | FDERYAQGRGFITKAVNGCHNASLTPEDKEQAQIHHEDL     |
| P05710 | PDKEFTTCWVNPGTDGGLPTNYSLTYSKEGEKTTYECPDYK   |
| P05710 | NSCFFSKQYTSIWKIYIITVNATNQMGSSSDPLYVDVTYI    |
| P05710 | SSSDPLYVDVTYIVEPEPFRNLTEVVKQLKDKKTYLWVKWS   |
| P22393 | CQVSLRDLDRAVILSHYIHNLSSEMFNEFDKRYAQGRGFM    |
| P12420 | CQVSLRELFDRAVILSHYIHNLSSEMFNEFDKRYAQGRGFV   |
| P01236 | CQVTLRDLDRAVILSHYIHNLSSEMFSEFDKRYTHGRGFI    |
| P01238 | CQVSLRDLDRAVILSHYIHNLSSEMFNEFDKRYAQGRGFI    |
| P01240 | CQVSLRDLDRAVMVSHYIHNLSSEMFNEFDKRYAQGKGF I   |
| Q9QUG3 | YAANYWQFPDGIYYEGCSEANVTKEMLVTSCVNATQAAANQA  |
| Q9QUG3 | YYEGCSEANVTKEMLVTSCVNATQAAANQAEFSREKQDSKLH  |
| P00745 | RCDCAEGWEGRFCLHEVRFNSCSAENGGCAHYCMEEEGRRH   |
| P00745 | MRRWESWEVDLDIKEVIIHPNYTKSTSDNDIALLR LAKPAT  |
| P00745 | TQVGQETVVTGWGYRDETKRNRTFVLSFIKVPVV PYNACVH  |
| P00745 | ETKRNRTFVLSFIKVPVV PYNACVH AMENKISENMLCAGIL |
| P04070 | SCDCRSWEGRFQREVSFLNCSLDNGGCTHYCLEEVGWRR     |
| P04070 | LRRWEKWEVDLDIKEIVFHPNYSKSTTDNDIAL LH LAQPAT |
| P04070 | QETLVTGWGYHSSREKEAKRNRTFVLNFIKIPVV PHNECSE  |
| P04070 | EAKRNRTFVLNFIKIPVV PHNECSEVMSNMVSENMLCAGIL  |
| P33587 | KILKRDTDLEDELEPDPRIVNGTLTKQGDSPWQA ILLDSKK  |
| P33587 | LRRRDHWELDLDIKEILVHPNYTRSSSDNDIAL LR LAQPAT |
| P33587 | QETVVTGWGYQSDRIKDGRRNRFTILTFIRIPLVARNECVE   |
| O54990 | VLEEIKAMATAIKQTKDALQNMSSSLKSLQDAATQLNTNLS   |
| O54990 | LQNMSSSLKSLQDAATQLNTNLSVRNSIENLSSSDCTSD     |
| O54990 | PASKICDSIRPSLSLGSLSLNSQLPSVDRELNTVTEVDKT    |

|        |                                            |
|--------|--------------------------------------------|
| 054990 | LES LVKRGYTTIDEIPNTIQNQTVDVIKDKVNTLDSISSNI |
| 054990 | KDMSQSIPIEDMLLQVSHYLNNRNRYLNQELPKLEEDSYW   |
| 054990 | LLKEQWQFYLSGMLFNNPDINMTFEQVYRDCKRGRGIYAAF  |
| 054990 | YRDCKRGRGIYAAFQLENNVNVSDHFNIDQISENINTELEN  |
| 054990 | PEKVKKILASLDSVQHFLTNNVSLVIGETKKFGKTLGYF    |
| P82295 | EQLGQPHWPPVQYTVYRPTTNYTKAPPPPTSAMNPIFNFTH  |
| P82295 | PTTNYTKAPPPPTSAMNPIFNFTHFLYDKVLYRDEPIPEGY  |
| P82295 | YFMLGMVTYQGACAPLRDQENNTLFRQLDASIDLNHYLPPS  |
| P82295 | SNKEVVQPLKMSSAIKACHANQTI FDMMRQHNIYDINDLTR |
| P82295 | INSEQFIQTRGKDYINALGGNLTNSIDQMIDDYIDMIKEA   |
| P82295 | LTNSIDQMIDDYIDMIKEANESVGHCAPLSYIYRQVGLI    |
| P82295 | ERRREQDYFEDASPSVSRGNRSGDRGGGGDGAPGSSSM     |
| P27918 | TPLLPKYPPPTVSMVEGQGEKNVTFWGRPLPRCEELQGQKLV |
| P07224 | VEKGSYYPGTGVAQFSINYKNESNPEAWQINVSLNIRPSAG  |
| P07224 | GVAQFSINYKNESNPEAWQINVSLNIRPSAGTGVMLALVSD  |
| P07225 | VEKGSYYPGSGIAQFHIDYNNVSSAEGWHVNVTLNIRPSTG  |
| P07225 | GIAQFHIDYNNVSSAEGWHVNVTLNIRPSTGTGVMLALVSG  |
| P07225 | VTLNIRPSTGTGVMLALVSGNNTVFFAVSLVDSTSEKSQDI  |
| P22891 | DEFWRRYKGGSPCISQPCLNHGSCQDSIWGYTCTCSPGYEG  |
| P22891 | GVIIRENFLVTTAKCSLLHRNITVKTYFNRTSQDPLMIKIT  |
| P22891 | VLTTAKCSLLHRNITVKTYFNRTSQDPLMIKITHVHVHMRY  |
| P22891 | DFAEHLIIPRTRGLLSGWARNGTDLGNSLTTRPVTLVEGEE  |
| P22891 | NSLTTRPVTLVEGEECGQVLNVTVTTRTYCERSSVAAMHWM  |
| P00744 | DEFWRTYMGGSPCASQPCLNNGSCQDSIRGYACTCAPGYEG  |
| P00744 | GVLIQDNFVLTATCSLLYANISVKTRSHFRLHVRGVHVHT   |
| P00744 | MVPLRLRVTHVEPAECGRALNATVTRTSCERGAAGAARW    |
| Q9CQW3 | DEFWRQYGGGSPCVSQPCLNNGTCEDHIRSYSCTCSPGYEG  |
| Q9CQW3 | GVLLQEDFVLTAKCSLLHSNISVKANVDQIRIRIKSTHVHM  |
| Q9CQW3 | DFAEHVLI PGTEGLLSGWMLNGTHLATTMLLSVTQADGEE  |
| Q9CQW3 | TTPMLLSVTQADGEECGQTLNVTVTTRTSCEKGSVVMGPVW  |
| Q5FWE3 | EAPGTPKSLIPGPSDPGPAVNRTESPMGALQPDEAEWPGR   |
| P24158 | NYDAENKLNVDLLIQLSSPANLSASVATVQLPQQDQPVPHG  |
| P24158 | AMGWGRVGAHDPPAQLVQELNVTVTFPCRPHNICTFVPRR   |
| P04963 | AALPHSVRQEPGSGIGYPYDNNTPYVAPGPPTDSRAPCPAL  |
| P04963 | TNAFVVCEYVTGSDCGDSLVLNLTLLAEPHAFEDHSFSRKD  |
| P04963 | LPNDENPLVRIDWKKYFTNESFPYHLGWHPSPAREIEF     |
| P47033 | ALGYTDTGAVDAWYGEISKYNSNPGFSESTGHFTQVVWKS   |
| P47033 | TSTASSRSVTSNSVNSVKFANTTVFSAQTTSSVSASLSSSV  |
| P47033 | VTASESITSETAQASSSTEKNI SNSAATSSSIYSNSASVSG |
| P47033 | AEYAITSEQSSALATSVPATNCSSIVKTTTLENSSTTTITA  |
| P47033 | LATSVPATNCSSIVKTTTLENSSTTTITAITKSTTTLATA   |

|        |                                              |
|--------|----------------------------------------------|
| P47033 | STTTITAITKSTTTTLATTANNSTRAATAVTTIDPTLDPTDNS  |
| P47033 | SSTGASLDSLRTTTSISVSSNTTQLVSTCTSES DYSDSPSF   |
| P35495 | CVWTLQVDPKYKLLVSIPTLNLTCGKEYVEILEGAPGSKSL    |
| Q12355 | ATATAQSDLDKYSRCDTLVGNLTIGGGLKTGALANVKEING    |
| Q12355 | GNLTIGGGLKTGALANVKEINGSLTIFNATNLTSFAADSLE    |
| Q12355 | GLKTGALANVKEINGSLTIFNATNLTSFAADSLESITDSL N   |
| Q12355 | TGALANVKEINGSLTIFNATNLTSFAADSLESITDSLNLQS    |
| Q12355 | TSIKSPVETVSDSLQFSFNGNQTKITFDDLWANNISLTDV     |
| Q12355 | QFSFNGNQTKITFDDLWANNISLTDVHVSVFANLQKINSS     |
| Q12355 | ANNISLTDVHVSVFANLQKINSSLGFINNSISSLNFTKLNT    |
| Q12355 | DVHSVSFANLQKINSSLGFINNSISSLNFTKLNTIGQTF SI   |
| Q12355 | ANLQKINSSLGFINNSISSLNFTKLNTIGQTF SIVSNDYLK   |
| Q12355 | FTKLNTIGQTF SIVSNDYLKNLSFNSLSTIGGALVVANNTG   |
| Q12355 | TIGQTF SIVSNDYLKNLSFNSLSTIGGALVVANNTGLQKIG   |
| Q12355 | YLKNLSFNSLSTIGGALVVANNTGLQKIGGLDNLT TIGGTL   |
| Q12355 | IGGALVVANNTGLQKIGGLDNLT TIGGTLLEVGNFTSLNLD   |
| Q12355 | QKIGGLDNLT TIGGTLLEVGNFTSLNLD SLKSVKGGADVES  |
| Q12355 | LNLD SLKSVKGGADVESKSSNFSCNALKALQKKGKIGESF    |
| Q3YJS9 | KGII PATILEFLEGQLQEVDNNTDARLADYFDVIGGTGTGG   |
| Q3YJS9 | DICYSTAAPTYFPPHYFATNTSNGDQYDFNLVDGDVA AVD    |
| Q3YJS9 | NYKQMLLSLGTGTNSEFAKNYTAEEAAKWGILQWMSPLWE     |
| Q09614 | RFKQKPGRNSMKTGLDMDAWNETAAEQVLQAWQRNFTKSLY    |
| Q09614 | RDWLISIQRGFDEEVAKGSFNLTSGTVIGSNVSE DARLAHA   |
| Q09614 | FDEEVAKGSFNLTSGTVIGSNVSE DARLAHALMCSHGSLFG   |
| Q6ISU1 | CLVLDVAPPGLDSPIWFSAGNCSALDAFTYGPSPATDGTWT    |
| P41222 | QPNFQQDKFLGRWFSAGLASNSWLREKKAALSMCKSVVAP     |
| P41222 | KKAALSMCKSVVAPATDGGNLNSTFLRKNQCETRTMLLQP     |
| P22057 | QPNFQQDKFLGRWFSAGLASNSWFREKKE LLFMCQTVVAP    |
| P22057 | KKELLFMCQTVVAPSTEGGLNSTFLRKNQCETKVMVLQP      |
| Q6AWJ9 | SVLASSSRFQRPQSQSVVENESVKFECESTDSYSELHYDW     |
| Q6AWJ9 | FDSGKDALLREDARLVLHKQNGTLSFASIIASDAQYQCQL     |
| Q6AWJ9 | VHCKAQGTFTPPQVQWVRD GENTLDPDHVEVDANGTLIFRNV  |
| Q6AWJ9 | VQWVRD GENTLDPDHVEVDANGTLIFRNVNSEHRGNYTCLA   |
| Q6AWJ9 | VEVDANGTLIFRNVNSEHRGNYTCLATNSQGGINATVAINV    |
| Q6AWJ9 | VNSEHRGNYTCLATNSQGGINATVAINVVVT PKFSVPPVGP   |
| Q6AWJ9 | AIGDPKPTIQWDKDLKYLSENNTDRERFRFLENGTLEIRNV    |
| Q6AWJ9 | KDLKYLSENNTDRERFRFLENGTLEIRNVQVEDEGSYGCTI    |
| Q13308 | SGTFQCVARDDVTGEEARSANASFNKIEWEAGPVVLKHPAS    |
| Q13308 | HPRPTYQWFRDGTPLSDGQSNHTVSSKERNLTLR PAGPEHS   |
| Q13308 | RDGTPLSDGQSNHTVSSKERNLTLR PAGPEHSGLYSCCAHS   |
| Q13308 | HSGLYSCCAHS AFGQACSSQNFTLSIADES FARVV LAPQDV |



|        |                                               |
|--------|-----------------------------------------------|
| Q13308 | FSAQPPPSLQWLFEDETPITNRSRPPHLRRATVVFANGSLLL    |
| Q13308 | ETPITNRSRPPHLRRATVVFANGSLLLTQVRPRNAGIYRCIG    |
| Q13308 | DAGVYTCHAAANLAGQRRQDVNITVATVPSWLKQPDSQLEE     |
| Q13308 | VVWYRNQMLISEDSESRFEVFKNGTLRINSVEVYDGTWYRCMS   |
| Q13308 | WVTDNAGTLHFARVTRDDAGNYTCIASNGPQGQIRAHVQLT     |
| Q13308 | KGKDRI LDPTKLGPRMHI FQNGSLVIH DVAPEDSGRYTCIA  |
| Q8BKG3 | SFAAVDRLQDSGAFQCVARDNVTGEEVRSTNASFNK WIEA     |
| Q8BKG3 | SGAFQCVARDNVTGEEVRSTNASFNK WIEAGPVVLKHPAS     |
| Q8BKG3 | RDGTPLSDDQSTHTVSSRERNLTLRPASPEHSGLYSCCAHN     |
| Q8BKG3 | HSGLYSCCAHNAFGQACSSQNFTLSVADES FARVVLAPQDV    |
| Q8BKG3 | FSAQPPPSLQWVFEDETPITNRSRPPHLRRAVVFANGSLLL     |
| Q8BKG3 | ETPITNRSRPPHLRRAVVFANGSLLLTQVRPRNAGVYRCIG     |
| Q8BKG3 | DTGVYTCHASNLAGQRRQDVNITVATVPTWLRKQPDSQLEE     |
| Q8BKG3 | VIWYRNQMLISEDSESRFEVSKNGTLRINSVEVYDGTLYRCVS   |
| Q8BKG3 | WVTDNAGTLHFARVTRDDAGNYTCIASNEPQGQIRAHVQLT     |
| Q8BKG3 | KGKDRI LDPTKLGPRMHI FQNGSLVIH DVAPEDSGSYTCIA  |
| P16620 | FLCAICVQGSVKQEWAEIGKNVSLECASENEAVAWKLGNT      |
| P16620 | GKNVSLECASENEAVAWKLGNTINKNHTRYKIRTEPLKSN      |
| P16620 | ECASENEAVAWKLGNTINKNHTRYKIRTEPLKSNDDGSEN      |
| P16620 | HTRYKIRTEPLKSNDDGSENDSQDFIKYKNVLALLDVNIK      |
| P16620 | DFIKYKNVLALLDVNIKDSGNYTCTAQTGQNHSTEFQVRPY     |
| P16620 | LLDVNIKDSGNYTCTAQTGQNHSTEFQVRPYLPSKVLQSTP     |
| P16620 | IKRRIKQDVMLYCLIEY PQNETNRNLKWLKDG SQFEFLD     |
| P16620 | WLKDG SQFEFLDTFSSISKLN DTHLNFTLEFTEVYK KENG T |
| P16620 | SQFEFLDTFSSISKLN DTHLNFTLEFTEVYK KENG TYKCTV  |
| P16620 | KLNDTHLNFTLEFTEVYK KENG TYKCTV FDDTGLEITSKEI  |
| P16620 | EVPQVSIDFAKAVGANKIYLNWTVNDGNDPIQKFFITLQEA     |
| P16620 | FFITLQEA GTPFTYHKDFINGSHTSYILDHFKPNTTYFLR     |
| P16620 | YHKDFINGSHTSYILDHFKPNTTYFLRIVGKNSINGGQPTQ     |
| P16620 | FRVRACSDLTKTCGPWSENVNGTTMDGVATKPTNLSIQCHH     |
| P16620 | GPWSENVNGTTMDGVATKPTNLSIQCHHDNVTRGNSIAINW     |
| P16620 | TTMDGVATKPTNLSIQCHHDNVTRGNSIAINWDVPKTPNGK     |
| P16620 | IRRIDEPHHTLYESVSPNTNYTVVSAITRHKKNGEPATG       |
| P16620 | KELPDPEKLN IATYQEVHSDNVTRSSAYIAEMISSKYFRPE    |
| P16620 | SNSDSELPILSEKDNLIKANLTHEHALKILESKLDRKRNAV     |
| P16620 | NVPLHDSSRDVFDGEIDINSNYTGFL EIVRDRNNALMAYS     |
| P08575 | ASTFERENDFSETTTSLS PDNTSTQVSPDSL DNASAFNTTG   |
| P08575 | TTTSLSPDNTSTQVSPDSL DNASAFNTTGVSSVQTPHLPHTH   |
| P08575 | SPDNTSTQVSPDSL DNASAFNTTGVSSVQTPHLPHTHADSQT   |
| P08575 | LTTTSLLAHSSAALPARTSNTTITANTSDAYLNASETTTL      |
| P08575 | LAHSSAALPARTSNTTITANTSDAYLNASETTTLSPSGSA      |

|        |                                                        |
|--------|--------------------------------------------------------|
| P08575 | ALPARTSNTTITANTS DAYL NASETTT LSPSGSAVISTTTI           |
| P08575 | ISTTTIATTPSKPTCDEKYANITVDYLYNKETKLF TAKLNV             |
| P08575 | TPSKPTCDEKYANITVDYLYNKETKLF TAKLNVNENVECGN             |
| P08575 | NKETKLF TAKLNVNENVECGNNTCTNNEVHNLTECKNASVS             |
| P08575 | LNVNENVECGNNTCTNNEVHNLTECKNASVSI SHNSCTAPD             |
| P08575 | VECGNNTCTNNEVHNLTECKNASVSI SHNSCTAPDKTLILD             |
| P08575 | TNNEVHNLTECKNASVSI SHNSCTAPDKTLILDVPPGVEKF             |
| P08575 | ADTTICLKWKNIETFTCDTQNI TYRFQCGNMI FDNKEIKLE            |
| P08575 | EPEHEYKCDSEILYNNHKFTNASKI IKTDFGSPGEPQI IFC            |
| P08575 | RSEAAHQGVI TWNPQRSFHNFTLCYIKETEKDCNLNDKNL              |
| P08575 | KPYTKYVLSLHAYI IAKVQRNGSAAMCHFTTKSAPPSQVWN             |
| P08575 | NGSAAMCHFTTKSAPPSQVWNMTVSMTSDNSMHVKCRPPRD              |
| P08575 | TTKSAPPSQVWNMTVSMTSDNSMHVKCRPPDRNGPHERYH               |
| P08575 | RNGPHERYHLEVEAGNTLVRNESHKNCDFRVKDLQYSTDYT              |
| P10586 | RVQRDEAI YECTATNSLGEINTSAKLSVLEEEQLPPGFPSI             |
| P10586 | VAPRFSIPSSQEVMPGGSVNLTCVAVGAPMPYVKWMMGAE               |
| P10586 | EDEMPVGRNVLELSNVRSANYTCVAISSLGMIEATAQVTV               |
| P10586 | VRTDEDVPSGPPRKVEVEPLNSTAVHVYWKLPVPSKQHGQI              |
| P10586 | PVLAERNGRIISYTVVFRDINSQQELQNI TTDTRFTLTGLK             |
| P10586 | GRIISYTVVFRDINSQQELQNI TTDTRFTLTGLKPDTTYDI             |
| A2A8L5 | RVQRDEAI YECTATNSLGEINTSAKLSVLEEDQLPSGFPTI             |
| A2A8L5 | VAPRFSIPSSQEVMPGGSVNLTCVAVGAPMPYVKWMMGAE               |
| A2A8L5 | EDEMPVGRNVLELSNVMRSANYTCVAISSLGMIEATAQVTV              |
| A2A8L5 | VRTDEDVPSGPPRKVEVEPLNSTAVHVSWKLPVVPNKQHGQI             |
| A2A8L5 | TGLTTSTTELTWDPVLAERNGHITNYTVVYRDINSQLELQ               |
| A2A8L5 | STTELTWDPVLAERNGHITNYTVVYRDINSQLELQNV TND              |
| A2A8L5 | GHITNYTVVYRDINSQLELQNV TNDTHLTLGLKPDTTYDI              |
| A2A8L5 | TNYTVVYRDINSQLELQNV TNDTHLTLGLKPDTTYDIKVR              |
| P23470 | LDQYARVGEEYQELQLDGF DNESSNKTWMKNTGKTVA ILLK            |
| P23470 | ARVGEEYQELQLDGF DNESSNKTWMKNTGKTVA ILLKDDYF            |
| P23470 | GAGLPGRFKAEKVEFHWHGNSGAGSEHSINGRRFPVEMQI               |
| P23470 | GTEASKVCSSPPIHMKVQFLNQ TALQVSWSPETIYHPFIM              |
| P23470 | QAVCRNDMRSDFSQ TMLFQANTTRIFQGTRIVKTGP TASP             |
| P23470 | GEKDSEKKEKSGVTHAAEERNQTEPSPTPSSPNRTAEGGHQ              |
| P23470 | VTHAAEERNQTEPSPTPSSPNRTAEGGHQTI PGHEQDHTAV             |
| P23470 | SRGDRFSEDSRFITVNP AEKNTSGMISRPAPGRMEWIIPLI             |
| Q12913 | ATGENGITQISSAESFHKQNGTGTPQVETNTSE DGESSGA              |
| Q12913 | SSTAESFHKQNGTGTPQVETNTSE DGESSGANDSLRTP EQG            |
| Q12913 | GTGTPQVETNTSE DGESSGANDSLRTP EQSGNGTDGASQKT            |
| Q12913 | SE DGESSGANDSLRTP EQSGNGTDGASQKT P S S T G P S P V F D |
| Q12913 | VFDIKAVSISPTNVILT WKSNDTAASEYKYVVKH KMEN EKT           |

|        |                                             |
|--------|---------------------------------------------|
| Q12913 | VVKHKMENEKTIITVVHQPCWNTGLRPATSYVFSITPGIGN   |
| Q12913 | NITGLRPATSYVFSITPGIGNETWGDPRVIKIVITEPIPVSD  |
| Q12913 | SDLRVALTGVRKAALSWSNGNGTASCRVLLESIGSHEELTQ   |
| Q12913 | VLLESIGSHEELTQDSRLQVNIISGLKPGVQYNINPYLLQSN  |
| Q12913 | NISGLKPGVQYNINPYLLQSNKTKGDPLGTEGGLDASNTER   |
| Q12913 | GQQSRDTEVLLVGLPEPGTRYNATVYSQAANGTEGQPQAEF   |
| Q12913 | LLVGLPEPGTRYNATVYSQAANGTEGQPQAEFRFNAIQVFD   |
| Q12913 | QPQAEFRFNAIQVFDVTAVNISATSLTLIWKVSDNESSSN    |
| Q12913 | DVTAVNISATSLTLIWKVSDNESSSNYTYKIHVAGETDSSN   |
| Q12913 | NISATSLTLIWKVSDNESSSNYTYKIHVAGETDSSNLNVSE   |
| Q12913 | SSSNYTYKIHVAGETDSSNLNVSEPRAVIPGLRSSTFYNIT   |
| Q12913 | NLNVSEPRAVIPGLRSSTFYNITVCPVLGDIEGTPGFLQVH   |
| Q12913 | SFQMHITQEGAGNSRVEITTNQSIIGGLFPGTKYCFEIVP    |
| Q12913 | IIGGLFPGTKYCFEIVPKPGNGTEGASRTVCNRTVPSAVFD   |
| Q12913 | CFEIVPKPGNGTEGASRTVCNRTVPSAVFDIHVVVYVTTTEM  |
| Q12913 | SPDGASEYVYHLVIESKHGSNHTSYDKAITLQGLIPGTLY    |
| Q12913 | HTSTYDKAITLQGLIPGTLYNIITISPEVDHVWGDPNSTAQY  |
| Q12913 | PGTLYNIITISPEVDHVWGDPNSTAQYTRPSNVSNIIDVSTNT |
| Q12913 | PEVDHVWGDPNSTAQYTRPSNVSNIIDVSTNTTAATLSWQNF  |
| Q12913 | PNSTAQYTRPSNVSNIIDVSTNTTAATLSWQNFDDASPTYSY  |
| Q12913 | QNFDDASPTYSYCLLIEKAGNSSNATQVVTDIGITDATVTE   |
| Q12913 | DDASPTYSYCLLIEKAGNSSNATQVVTDIGITDATVTEIIP   |
| Q12913 | TCPPGANAGFELEVSSGAWNNATHLESCSSENGTEYRTEVT   |
| Q12913 | LEVSSGAWNNATHLESCSSENGTEYRTEVTYLNFTSYNIS    |
| Q12913 | HLESCSSENGTEYRTEVTYLNFTSYNISITTVSCGKMAAP    |
| Q12913 | SENGTEYRTEVTYLNFTSYNISITTVSCGKMAAPTRNTCT    |
| Q12913 | PTRNTCTTGITDPPPPDGSPNITSVSHNSVKVKSFGFEASH   |
| Q12913 | EKGRSQSLSEVLKYEIDVGNESTLGYNGKLEPLGSYRA      |
| Q12913 | YNGKLEPLGSYRACVAGFTNITFHPQNKGLIDGAESYVSF    |
| Q64455 | PIFDIEAVVSPTSVLLTWKHNDSGASECRIENKMESNLTFP   |
| Q64455 | TWKHNDSGASECRIENKMESNLTFPVKNQTSNITGLSPGT    |
| Q64455 | GASECRIENKMESNLTFPVKNQTSNITGLSPGTSYTFSI     |
| Q64455 | RIENKMESNLTFPVKNQTSNITGLSPGTSYTFSIISVTTN    |
| Q64455 | NITGLSPGTSYTFSIISVTTNETLNKTIITTEPWPVSDLHVT  |
| Q64455 | LSPGTSYTFSIISVTTNETLNKTIITTEPWPVSDLHVTSVGV  |
| Q64455 | SDLHVTSVGVQTARLTWSNANGTASYRMLIEELTHSSVNI    |
| Q64455 | ANGTASYRMLIEELTHSSVNIISGLKPGTNNSFAPESNET    |
| Q64455 | LIEELTHSSVNIISGLKPGTNNSFAPESNETQADFAVAEE    |
| Q64455 | SVNIISGLKPGTNNSFAPESNETQADFAVAEEVDPDANGTKR  |
| Q64455 | FPESNETQADFAVAEEVDPDANGTKRIPVTNLSQLHKNSLVS  |
| Q64455 | DFAVAEEVDPDANGTKRIPVTNLSQLHKNSLVSVDPPSGQDP  |

|        |                                                                  |
|--------|------------------------------------------------------------------|
| Q64455 | GQDPSLTEILLTDLKPDQYNATIYSQAANGTEGQPRNKVF                         |
| Q64455 | LLTDLKPDQYNATIYSQAANGTEGQPRNKVFKTNSTQVSD                         |
| Q64455 | IYSQAANGTEGQPRNKVFKTNSTQVSDVRAMNISASSMTLT                        |
| Q64455 | QPRNKVFKTNSTQVSDVRAMNISASSMTLTWKSNDGSRSTS                        |
| Q64455 | DGSRSTSIVYKIHVAGGTHSVNQTVNKTEAILGLSSSTLYN                        |
| Q64455 | TSIVYKIHVAGGTHSVNQTVNKTEAILGLSSSTLYNITVH                         |
| Q64455 | NQTVNKTEAILGLSSSTLYNITVHPFLGQTEGTPGFLQVY                         |
| Q64455 | TPGFLQVYTSPDQVSDFRVTNVSTRAIGLAWRSNDSKSF EI                       |
| Q64455 | VSDFRVTNVSTRAIGLAWRSNDSKSF EIFIKQDGGEKHRNA                       |
| Q64455 | SNDSKSF EIFIKQDGGEKHRNASTGNQSYMVEDLKPGETSYH                      |
| Q64455 | SFEIFIKQDGGEKHRNASTGNQSYMVEDLKPGETSYHF E I I P                   |
| Q64455 | YHF E I I PRGPDGTEGLSSTVNGSTDPASVTDIRVVNI STTE                   |
| Q64455 | LSSTVNGSTDPASVTDIRVVNI STTEMQLEWQNTDDASGYT                       |
| Q64455 | ASGYTYHLVLESKSGS I I RTNSSQKWITVGS LTPGTLYNVT                    |
| Q64455 | RTNSSQKWITVGS LTPGTLYNVTI FPEVDQIQI SNSITQY                      |
| Q64455 | GISNSITQYTRPSSVSHIEVNTTTTAAIRWKNE DAASASY                        |
| Q64455 | DAASASYAYSVLILKTDGGSNVTSNFTKDPSIL I PELIPGV                      |
| Q64455 | ASYAYSVLILKTDGGSNVTSNFTKDPSIL I PELIPGVSYTV                      |
| Q64455 | ACPFMYTGFE LGVRSDSWDMTRLENCTSDDDTECRTEVA                         |
| Q64455 | YTGFE LGVRSDSWDMTRLENCTSDDDTECRTEVAYLNFST                        |
| Q64455 | RLENCTSDDDTECRTEVAYLNFSTSYNIS IATLSCGKMALP                       |
| Q64455 | SDDDECRTEVAYLNFSTSYNIS IATLSCGKMALPAQNICT                        |
| Q64455 | PAQNICTTGITDPPTPDGSPNITSVSHNSVKVKS GF EASH                       |
| Q64455 | EKKGQSQGLSEVLN Y E I D V G N Q S T L G Y N G R L E P L G S Y R A |
| Q64455 | YNGRLEPLGSRACVAGFTNITYNLQNDGLINGDES Y V S F                      |
| Q15262 | DSSDHDPGEKARLQLPTMKENDTHCIDFSYLLYSQKGLNPG                        |
| Q15262 | PGLTNI LVRVNGPLANP IWNVTGFTGRDWLRAELAVSTFW                       |
| Q15262 | PCDKSPHFLRLGDVEVNAGQNA TFQCIATGRDAVHNKLWLQ                       |
| Q15262 | LKIAEI QARRIAVDWESLGYNITRCHTFNVTI CYHYFRGHN                      |
| Q15262 | RRIAVDWESLGYNITRCHTFNVTI CYHYFRGHNESKADCLD                       |
| Q15262 | NITRCHTFNVTI CYHYFRGHNESKADCLDMDPKAPQHVVNH                       |
| Q15262 | CLDMDPKAPQHVVNHLPYTNVSLKMILTNPEGRKESEETI                         |
| Q15262 | RSFDPVPVAGPPQTVSNLWNS THHVFMHLHPGTTYQFFIR                        |
| Q15262 | TYQFFIRASTVKGFGPATAINVTTNISAPTL PDYEGVDASL                       |
| Q15262 | FIRASTVKGFGPATAINVTTNISAPTL PDYEGVDASLNETA                       |
| Q15262 | VTTNISAPTL PDYEGVDASLNETATITVLLRPAQAKGAPI                        |
| Q15262 | FAAELPPGNLPEPAPFTVGDNRTYQGFWNPLAPRKGYN I Y                       |
| P35822 | DSSDHDPGEKARLQLPTMKENDTHCIDFSYLLYSQKGLNPG                        |
| P35822 | PGLTNI LVRVNGPLANP IWNVTGFTGRDWLRAELAVSTFW                       |
| P35822 | PCDKSPHFLRLGDVEVNAGQNA TFQCIATGRDAVHNKLWLQ                       |
| P35822 | LKIAEI QARRIAVDWESLGYNITRCHTFNVTI CYHYFRGHN                      |

|        |                                             |
|--------|---------------------------------------------|
| P35822 | RRIAVDWESLGYNITRCHTFNVTICYHYFRGHNESRADCLD   |
| P35822 | NITRCHTFNVTICYHYFRGHNESRADCLDMDPKAPQHVVNH   |
| P35822 | CLDMDPKAPQHVVNHLPPYTNVSLKMILTNPEGRKESEETI   |
| P35822 | RSFDPAVPVAGPPQTVSNLWNSTHHVFMHLHPGTTYQFFIR   |
| P35822 | TYQFFIRASTVKGFGPATAINVTTNISAPSLPDYEGVDASL   |
| P35822 | FIRASTVKGFGPATAINVTTNISAPSLPDYEGVDASLNETA   |
| P35822 | VTTNISAPSLPDYEGVDASLNETATTITVLLRPAQAKGAPI   |
| P35822 | FAAELPPGNLPEPAPFTVGDNRTYKGFWNPLAPRKGYNIIY   |
| P28827 | NTLTKPTS DPWMPSGSFMVLVNASGRPEGQRAHLLLPQLKEN |
| P28827 | NASGRPEGQRAHLLLPQLKENDTHCIDFHYFVSSKSNSPPG   |
| P28827 | PGLLVYVKVNNGLGNPIWNI SGPTRTWNRAELAISTFW     |
| P28827 | PLKEIKVTSSRRFIASFVNVNTTKRDAGKYRCMIRTEGGVG   |
| P28827 | LEVVEVKSQRQITIRWEPFGYNVTRCHSYNLTVHYCYQVGGQ  |
| P28827 | RQITIRWEPFGYNVTRCHSYNLTVHYCYQVGGQEQVREEVS   |
| P28827 | SWDTENSHPQHTITNLSPTYTNVSVKLIIMNPEGRKESQELI  |
| P28827 | TLYEITYKAVSSFDPEIDLNSQSGRVSKLGNETHLFFGLY    |
| P28827 | SSFDPEDLNSQSGRVSKLGNETHLFFGLYPGTTYSFTIR     |
| P28827 | QFTTKISAPSMPAYELETPLNQTDNTVTVMKPAHSRGAPV    |
| P28827 | RRTKKTTEILKCYVPVIHFQNASLNSQYFAAEFPADSLQ     |
| P28827 | FAAEFPADSLQAAQPFTIGDNKTYNGYWNTPLLPYKSYRIY   |
| Q16849 | GVKLEILAHEVHMSSGSFINISVVGPAITFRIRHNEQNLS    |
| Q16849 | FINISVVGPAITFRIRHNEQNLSLADVTQQAGLVKSELEAQ   |
| Q13332 | VAPRFSILPMSHEIMPGGNVNITCVAVGSPMPYVKKMQGAE   |
| Q13332 | EDDMPVGRNVLELTDVKDSANYTCVAMSSLGVI EAVAQITV  |
| Q13332 | VRTDEDVPSAPPRKVEAEALNATAIRVLWRS PAPGRQHGI   |
| Q13332 | VLSIPEDTPRGHPQILEAAGNASAGTVLLRWLPPVPAERNG   |
| P23471 | WDKTSLENTFIHNTGKTVEINLTNDYRVSSGGVSEMVFKASK  |
| P23471 | GGVSEMVFKASKITFHWGKCNMSSDGSEHSLEGQKFPLEMQ   |
| P23471 | VSRFGQAALDPFILLNLLPNSTDKYYIYNGSLTSPPCDT     |
| P23471 | LDPFILLNLLPNSTDKYYIYNGSLTSPPCDTVDWIVFKDT    |
| P23471 | EIIEHAVCSSEPENVQADPENYTSLLVTWERPRVYDTMIE    |
| P23471 | HEFLTDGYQDLGAILNLLPNMSYVLQIVAICTNGLYGKYS    |
| P23471 | AKTNRSPTRGSEFSGKGDVPNTSLNSTSQPVTKLATEKDIS   |
| P23471 | RSPTRGSEFSGKGDVPNTSLNSTSQPVTKLATEKDISLTSQ   |
| P23471 | EGTSASLNDGSKTVLRS PHMNLGTAESLNTVSI TEYEEES  |
| P23471 | GAEDSSGSSPATS AIPFISENISQGYIFSSENPETITYDVL  |
| P23471 | FSSENPETITYDVLIPESARNASEDSTSSGSEESLKDPSME   |
| P23471 | STDITAQPDVGSGRESFLQNTNYTEIRVDESEKTTKSFSAGP  |
| P23471 | SGASSDSEFLLPDTDGLTALNISSPVVAEFTYTTSVFGDD    |
| P23471 | TTSVFGDDNKALSKSEIIYGNELQIPSFNEMVYPESTV      |
| P23471 | MVYPESTVMPNMYDNVKNLNASLQETSVSISSTKGMFPGS    |

|        |                                            |
|--------|--------------------------------------------|
| P23471 | SLAHTTTKVFDEHISQVPENNFSVQPTHTVSQASGDTSLKP  |
| P23471 | LSIHKCMSCSSYRESQEKVMNDSSTHENSLMDQNNPISYSL  |
| P23471 | VLTSDEESGSGQGTSDSLNENETSDFSFADTNEKDADGIL   |
| P23471 | TSSVTSENSEVFHVSEAEASNSHESRIGLAEGLESEKKAV   |
| Q9BVG9 | LGVPLPERDYGGNCLIIDPDNETDPFHNIWDKLDGFVPAHF  |
| P17219 | KEIEDLGENSVPRFIETRNCNKTOPTCRPPYICKESLYSI   |
| Q15223 | LALGLTAFFLPGVHSQVVQVNDSDMYGFIGTDVVLHCSFANP |
| Q15223 | SFANPLPSVKITQVTWQKSTNGSKQNVAIYNPSMGVSVLAP  |
| Q15223 | EGVYICEFATFPTGNRESQLNLTVMKPTNWIETQAVLRA    |
| Q15223 | VVSWETRLKGEAEYQEIRNPNGTVTVISRYRLVPSREAHQQ  |
| Q15223 | KLTCKADANPPATEYHWTTLNGSLPKGVEAQNRTLFFKGP   |
| Q15223 | ATEYHWTTLNGSLPKGVEAQNRTLFFKGPINYSLAGTYICE  |
| Q15223 | GSLPKGVEAQNRTLFFKGPINYSLAGTYICEATNPIGTRSG  |
| Q15223 | GTIICEATNPIGTRSGQVEVNIETFPYTPSPEHGRRAGPV   |
| Q9JKF6 | LALGLTAFFLPGHTQVVQVNDSDMYGFIGTDVVLHCSFANP  |
| Q9JKF6 | SFANPLPSVKITQVTWQKASNGSKQNMAIYNPTMGVSVLPP  |
| Q9JKF6 | EGMYICEFATFPTGNRESQLNLTVMKPTNWIETRAVLRA    |
| Q9JKF6 | PSAVSWETRLKGEAEYQEIRNFNGTVTVISRYRLVPSREAH  |
| Q9JKF6 | AVSWETRLKGEAEYQEIRNPNGTVTVISRYRLVPSREAHRQ  |
| Q9JKF6 | FDGNWYLQRTDVKLTCKADANPPATEYHWTTLNGSLPKGVE  |
| Q9JKF6 | KLTCKADANPPATEYHWTTLNGSLPKGVEAQNRTLFFRGP   |
| Q9JKF6 | ATEYHWTTLNGSLPKGVEAQNRTLFFRGPITYSLAGTYICE  |
| Q9JKF6 | GTIICEATNPIGTRSGQVEVNIETFPYTPPEHGRRAGQMP   |
| P32507 | NADLRDATLAFRGLRVEDEGNYTCEFATFPNGTRRGVTWLR  |
| P32507 | FRGLRVEDEGNYTCEFATFPNGTRRGVTWLRVIAQPENHAE  |
| P32507 | PASAVAQGSQLLVHSVDRMVNTTFICTATNAVGTGRAEQVI  |
| Q9NQS3 | CGALAGPIIVEPHVTAVWGKNVSLKCLIEVNETITQISWEK  |
| Q9NQS3 | EPHVTAVWGKNVSLKCLIEVNETITQISWEKIHGKSSQTV   |
| Q9NQS3 | HHPQYGFVQGEYQGRVLFKNYSLNDATITLHNI GFSDSGK  |
| Q9NQS3 | VLVEPTVSLIKGPDSLIDGGNETVAAICIAATGKPVAHIDW  |
| Q9NQS3 | AHIDWEGDLGEMESTTTSFPNETATIIISQYKLFPTRFARGR |
| Q9NQS3 | WPDGLLASDNTLHFVHPLTFNYSGVYICKVTVNSLQQRSDQK |
| P15151 | SYSESKRLEFVAARLGAELRNASLRMFGLRVEDEGNYTCLF  |
| P15151 | GAELRNASLRMFGLRVEDEGNYTCLFVTFPQGSRSVDIWL   |
| P15151 | STGGRPPAQITWHSDLGGMPNTSQVPGFLSGTVTVTSLWIL  |
| P15151 | GTVTVTVSLWILVPSQVDGKNVTCKVEHESFEKPLLTVNL   |
| P15151 | KNVTCKVEHESFEKPLLTVNLTVYYPPEVVISGYDNNWYL   |
| P15151 | GQNEATLTCDARSNPEPTGYNWSTMGPLPPFAVAQGAQLL   |
| P15151 | PPFAVAQGAQLLIRPVDKPIINTTLCNVTVNALGARQAEITV |
| P15151 | QGAQLLIRPVDKPIINTTLCNVTVNALGARQAEITVQVKEGP |
| Q6UX71 | GQDSPEPRSFTDLLDDGQDNNQIEEDTDHNYVISRIYGP    |

|        |                                              |
|--------|----------------------------------------------|
| Q6UX71 | KDKVKIHGILSNTHRQAARVNLSFDFPFYGHFLREITVATG    |
| Q1ENI8 | CDKKGLVVDCSSSGLTRI PKNISRNVRLVIRNNRIHKLKR    |
| Q1ENI8 | CARPAEESWTGEEIKLTCAKNSSSKLVVWMYENVEVDSSSL    |
| Q1ENI8 | LVREHVEKGLILNVDELHPKNVSYESVLHVTHVQALMGLSG    |
| Q1ENI8 | DLTHVTALSRHSYATGAFCNRTCENLDPCFNIPLSPNDR      |
| Q1ENI8 | SEAGKEYLPFEKDSNMDCCRNFSEENPIRCFLAGDLRANEQ    |
| Q92626 | GDPFVATSIVEAIAIVDRAINSTRHLFDSRPRS PNDLLAL    |
| Q92626 | FERTLQLIQEHVQHGLMVDLNGTSYHYNDLVSPQYLNLIAN    |
| Q92626 | NGTSYHYNDLVSPQYLNLIANLSGCTAHRRVNNCSDMCFHQ    |
| Q92626 | PQYLNLIANLSGCTAHRRVNNCSDMCFHQKYRTHDGTENN     |
| Q92626 | QHCSNVCSNDPPCFVSMI PPNDSRARS GARC MFFVRSSPVC |
| Q92626 | NIQRGRDHGIPPHYDYRVYCNLSAAHTFEDLKNEIKNPEIR    |
| Q92626 | AQLTQIKQTSLARILCDNADNITRVQSDVFRVAEFPHGYGS    |
| Q92626 | TKKTRPRKIPSVGRQGEHLSNSTSAFSTRSDASGTNDFREF    |
| Q92626 | KLESRLSTTECVDAGGES HANN TKWK DACTICECKDGQVT  |
| Q9VZ24 | QWVFNQRLLQSTPSSLQLQANGSLILLQPQLSAGTYRCEA     |
| Q9VZ24 | PNVQLAEKYQISGAGSLFVKNVTI PDGGRYECQLKNQFGRA   |
| Q9VZ24 | GDRYVRIAFEA AKEIDLAINNTLDMLFSNRSDKAPPNYGE    |
| Q9VZ24 | AEEAKEIDLAINNTLDMLFSNRSDKAPPNYGELLRVFRFPT    |
| Q9VZ24 | AAEIYERTLVNIRKHVQEGDNLTKSEEYFRDLLSREHLH      |
| Q9VZ24 | REHLHLVAELSGCMEHREMPNCTDMCFHSRYRSIDGTENN     |
| Q9VZ24 | SYIDASQVYGYSTAFQAQLRNLTSQEGLLRVGVHFPQKDM     |
| Q9VZ24 | FATAALRFGHTIINPILHRLNETFQIPQGHLLLHKAFAP      |
| Q9VZ24 | NIQRGRDHGMPGYNVYRKLCLNTVAQDFEDLAGEISSAEIR    |
| P20742 | DRLLHLCLVLLILLLSASDSNSTEPQYMLVLPSSLHTEAPK    |
| P20742 | VPSLLHTEAPKKGCVLLSHLNETVTVSASLES GRENRSLFT   |
| P20742 | LLSHLNETVTVSASLES GRENRSLFTDLVAEKDLFHCVSFT   |
| P20742 | PKFEVKVQVPKIIISIMDEKVNITVCGEYTYGKVPVPLATVS   |
| P20742 | GVPIPNKLEFFISVNDANYSNATTNEQGLAQFSINTTISISV   |
| P20742 | DANYYSNATTNEQGLAQFSINTTISISVKNLFRVFTVHPNL    |
| P20742 | VPETVRSYFPETWIWELVAVNSSGVAEVGVTPDITTEWKA     |
| P20742 | CGNERQTLSTWTVTPKTLGNVNFVSAEAMQSLLELCNEVVE    |
| P20742 | EAEGIEQEKTFSSMTCASGANVSEQLSLKLP SNVVKESARA   |
| P20742 | GCGEQNMVLFAPNIYVLNLYNETQQLTQEI KAKAVGYLITG   |
| P20742 | SVSRTEVSNHVLIIYVEQVTNQTLSFSFMVLQDIPVGDLPK    |
| Q7SIC2 | KHYENFYCNKGSFQLWAQSGNETQQTRVLSSGDYGSVPRNV    |
| Q7SIC2 | GNETQQTRVLSSGDYGSVPRNVTHTFQIQDPDTEMTGVIVP    |
| Q7SIC2 | EMTGVI VPGGFEDLFY YLGTNATDTHTPYIPSSDSSSTT    |
| Q7SIC2 | TLQSFVYAELSFTPRTDTVNGTAPANTVWHTGANALASTA     |
| Q7SIC2 | SQYGYQIVAPFVTATQAQDTNYTLSTISMSTPSTVTVPTW     |
| Q9CYK2 | VVGLHLLLLQATVLSLTAGNLSLVSAAWTQEKHHQPAHL      |

|        |                                                                               |
|--------|-------------------------------------------------------------------------------|
| Q9CYK2 | LSLVSAAWTQEKNHHQPAHLNSSSLQQVAEGTISI SEMWQND                                   |
| Q16769 | VSPSASAWPEEKNYHQPA ILNSSALRQIAEGTISI SEMWQND                                  |
| Q16769 | HELHELGLLKDHSLEGRY FQNYSYGGVI QDDHIPFLRRGVP                                   |
| O00391 | CRDFNIPGFPTVRRFFKAFTKNGSGAVFPVAGADVQTLRERL                                    |
| O00391 | ANVVRKFGVTD FPSCYLLFRNGSVSRVPVLMESRSFYTAYL                                    |
| O00391 | VQNVAAAPELAMGALELESRNSTLDPGKPEMMKSP T N T P H                                 |
| P02752 | SPEPNMHECTLYSESSCCYANFTEQLAHSPI I KVSNSYWNR                                   |
| P02752 | DESGENHCKSKCVPYSEMYANGTDMCQSMWGESFKVSESSC                                     |
| Q05186 | VRKERVVRPDSELGERPPEDNQSFQYDHEAFLGKEDSKTFD                                     |
| Q15293 | VRKERVVRPDSELGERPPEDNQSFQYDHEAFLGKEDSKTFD                                     |
| Q96D15 | AAWDTYDTRDGRVWEE LR NATY GHYAPGEEFH DVE DAET                                  |
| P78509 | FGNQFMCSVVASHVSHLPTTNLSF IWIAPPAGTGC VNF MAT                                  |
| P78509 | GNAVTFCEPYGPRELIT TGLN T T T ASVLQFSIGSGSCRF SY                               |
| P78509 | GSGSCRF SYSDPSI IVLYAKNNSADWIQLEKIRAPSNVSTI                                   |
| P78509 | LYAKNNSADWIQLEKIRAPSNVSTI I H I L Y L P E D A K G E N V Q                     |
| P78509 | CLPEICAGPHLPHSTVYSSENYSGWNRIT I P L P N A A L T R N T                         |
| P78509 | DYPMNQMSVWMLLANEGMVKNETFCAATPSAMIFGKSDGDR                                     |
| P78509 | QPQHKGKSAQWALDDVLI GMNDSSQTGFQDKFDGSI DLQAN                                   |
| P78509 | TVYLP LST I S P R T R F R W I Q A N Y T V G A D S W A I D N V V L A S G C P   |
| P78509 | FPQTTN I L F I N V P L P Y T A Q T N A T R F R L W Q P Y N N G K K E E I W I  |
| P78509 | DNVYIGPQCEEMCNGQGSCINGTKCICDPGYSGPTCKISTK                                     |
| P78509 | LQYSLNGGLSWSLLQEFLFSNSNVGRY I A L E I P L K A R S G S                         |
| P78509 | PSENGHFYSPWVIDQILIGGNISGNTVLEDDFTT L D S R K W L                              |
| P78509 | SGMALHFSGGCSRLVTVDLNL T N A E F I Q F Y F M Y G C L I T P N                   |
| P78509 | DLDLRGAKFLQYWGRIGSENMTSCHRPICRKEGVLLDYST                                      |
| P78509 | YQKYISVRHDY I L L P E D A L T N T T R L R W W Q P F V I S N G I V V S G       |
| P78509 | EINPSQLVDTFDDEGTSHEENWSFY P N A V R T A G F C G N P S F H                     |
| P78509 | SNSIGCSPPQFHEATIYN SVNSSSWKRTIQLPDHVSSSAT                                     |
| P78509 | NVPLEARMKGVLLRWWQPRHNGTGHQWALDHVEVVLVSTR                                      |
| P78509 | WALDHVEVVLVSTRQNYMMNFSRQHGLRHFYNRRRSLRR                                       |
| Q60841 | FGNQFMCSVVASHVSHLPTTNLSFVWIAPPAGTGC VNF MAT                                   |
| Q60841 | GNAVTFCEPYGPRELIT T T C L N T T T A S V L Q F S I G S G S C R F S Y           |
| Q60841 | GSGSCRF SYSDPSITVSYAKNNTADWIQLEKIRAPSNVSTV                                    |
| Q60841 | SYAKNNTADWIQLEKIRAPSNVSTVIH I L Y L P E E A K G E S V Q                       |
| Q60841 | CLPEICAGPHLPHSTVYSSENYSGWNRIT I P L P N A A L T R D T                         |
| Q60841 | DYPMNQMSVWMLLANEGMAKNDSFCATTPSAMVFGKSDGDR                                     |
| Q60841 | VCFCDLGYTAAQGTCSNTPNHSEMFRFEGKLSPLWYKIT                                       |
| Q60841 | QPQHKGKSAQWALDDVLI G V N D S S Q T G F Q D K F D G S I D L Q A N              |
| Q60841 | TVYLP L A T N S P R T R F R W I Q T N Y T V G A D S W A I D N V I L A S G C P |
| Q60841 | FPQTT I L F I N V P L P Y G A Q T N A T R F R L W Q P Y N N G K K E E I W I   |
| Q60841 | DNVYIGPQCEEMCYGHGSCINGTKCICDPGYSGPTCKISTK                                     |



|        |                                             |
|--------|---------------------------------------------|
| Q60841 | LQYSLNGGLSWSLLQEFLFSNSNVGRYIALEMLKARSGS     |
| Q60841 | PSENGHFYSPWVIDQILIGGNI SGNTVLEDDFSTLDSRKWL  |
| Q60841 | SGLALHFSGGCSRLLVTVDLNLTNAEFIQFYFMYGCLITPS   |
| Q60841 | DLDLRGAKFLQYWGRIGSENNMTSCHRPVCRKEGVLLDFST   |
| Q60841 | FQKYISVRHDYILLPEGALTNTTRLRWWQPFVISNGLVVS    |
| Q60841 | EINPSQLVDTFDDEGSSHEENWSFY PNAVRTAGFCGNPSFH  |
| Q60841 | SNSIGCSPFQFHEATIYNVNSSWKRTIQLPDHVSSSAT      |
| Q60841 | NVPLEARMKGVLLRWWQPRHNGTGHQWALDHVEVVLVSTR    |
| Q60841 | WALDHVEVVLVSTRKQNYMMNFSRQHGLRHFYNNRRRSLRR   |
| P81191 | QYVRAAISICGPNMQTMRPRNGSGPIVPPDFLAMYGMARY    |
| P00797 | VDMARLGPEWSQPMKRLTLGNTTSSVILTNYMDTQYYGEIG   |
| P00797 | YTACVYHKLFDAADSSSYKHNGTELTLYSTGTVSGFLSQD    |
| Q6H3X3 | LHYDCGSKTVTPVSPGLGKLNVTTAWKAQNPVLEVV DILT   |
| P30986 | LNCA LGGNDLLSCLTFNGVRNHTVFSADSDSDFNRFHLHLSI |
| P30986 | FTPFPHRSGTRLMVEYIVAWNQSEQKKKTEFLDWLEKVYEF   |
| P30986 | NPRLGYVNHIDL DLGGIDWGNKTVNNAIEISRSWGESYFL   |
| P07949 | TRLHENNWICIQEDTGLLYLNRSLDHSSWEKLSVRNRGFPL   |
| P07949 | SLREGECQWPGCARVYFSFFNTSFPACSSLKPRELFCFPETR  |
| P07949 | NRPPGTFHQFRLLPVQFLCPNISVAYRLLGEGLPFRCAPD    |
| P07949 | STLLPGDTWAQQTFRVEHWPNETSVQANGSFVRATVHDYRL   |
| P07949 | TWAQQTFRVEHWPNETSVQANGSFVRATVHDYRLVLRNRLS   |
| P07949 | QANGSFVRATVHDYRLVLRNRLSISENRTMQLAVLVNDSDF   |
| P07949 | VRATVHDYRLVLRNRLSISENRTMQLAVLVNDSDFQGPAG    |
| P07949 | VLRNRLSISENRTMQLAVLVNDSDFQGPAGVLLLHFNVS     |
| P07949 | VLVNDSDFGQGPAGVLLLHFNVSVLPVSLHLPSTYSLVSR    |
| P07949 | ENCQAFSGINVQYKLSHGANCSTLGVVTS AEDTSGILFVN   |
| P07949 | NCSTLGVVTS AEDTSGILFVN DTKALRRPKCAELHYMVVAT |
| P07949 | LGSPTRCEWRQGDGKGI TRNFSTCSPSTKTC PDGHCDVVE  |
| Q00017 | GRTDCSGTGAEVCSYVYDGVNETILTFFPAYLENAAKLFTAK  |
| Q00017 | AGVEYVDHWSYVDSIYETLGNATVNSYFPI DHTHTSPAGAE  |
| Q9UBD6 | VFVRYDFEADAHWWSERTHKNLSDMENEFFYRYPFQDVHV    |
| Q96CC6 | PHWEPEDITKWP ICTKNSAGNHTNHPHMDCVITGRPCCIGT  |
| Q00001 | ASTKGATKTCNILSYGAVADNSTDVGP AITSAWAACKSGGL  |
| Q00001 | DIDGYWSSMTAVAGDGVQLNNITVKNWKGTEANGATRPPIR   |
| P02879 | SGWSFTLEDNNIFPKQYPIINFTTAGATVQSYTNFIRAVRG   |
| P02879 | TAIQESNQAFASPIQLQRRNGSKFSVDVSILIP IALMV     |
| P02879 | VMIYDCNTAATDATRWQIWDNGTI INPRSSLVLAATSGNSG  |
| P02879 | GTTLTVQTNIYAVSQGWLPNTNTQPFVTTIVGLYGLCLQAN   |
| P16094 | GIFRTPIVLVDNKGNRVQITNVTSKVVTSNIQLLNRNIA     |
| P34967 | TERKDVETTLCPNASSRVSKNISYDSSYPALENKAGRSRSQ   |
| P24817 | VYDIPLLYSTISDSRRFILLNLTSAAYETISVAIDVTNVYV   |

|        |                                              |
|--------|----------------------------------------------|
| P33186 | RFTFIENQIRNNFQQRIRPANNTISLENKWGKLSFQIRTSG    |
| P84853 | SLRNEAKDPSLQCYGIPMLPNNSSTIKYLVLKLGASQKTI     |
| P84531 | IANNVGTGFKPSQTIISLENNWSALSQIQIAKNKNGQFET     |
| P84530 | GSSSTSYSKFIGALRKALPSNGTVYNI TLLSSASGASRYT    |
| P84530 | SYSKFIGALRKALPSNGTVYNI TLLSSASGASRYTLMKLS    |
| P84530 | GKAITVAIDVTNVYIMGYLVNSTSYFFNESDAKLASQYVFA    |
| P84530 | IDVTNVYIMGYLVNSTSYFFNESDAKLASQYVFASTIVTL     |
| P84530 | ISLENEWSALSQIQIQAQTNNGTFKTPVVIMDAGGQVEIG     |
| Q9HB40 | TVRKDAYMFWWLYYATNSCKNFSELPVMMWLGQGGPGSSTG    |
| Q9HB40 | LQAASLLFVDNPGVTGFSYVNGSGAYAKDLAMVASDMMVLL    |
| Q9HB40 | EEDFMKPVISIVDELEAGINVTYNGQLDLIVDTMGQEAW      |
| Q8TEB7 | ALSPQAPGSRGAEAVWTAYLNVSWRVPHTGVNRTVWELSEE    |
| Q8TEB7 | AEAVWTAYLNVSWRVPHTGVNRTVWELSEEGVYGQDSPLEP    |
| Q8TEB7 | AGVLVPDGPALNACNPHTNFTVPTVWGSTVQVSWLALIQ      |
| Q6ZSG1 | PIPHYQHLYLATPRMHFPRNSSSTQMVVHEIRNYPYQLH      |
| P00667 | DPSASSISSNYCNQMMQSRNLTDRCRCPVNTFVHESLADV     |
| P07847 | DSSTSSASSNYCNQMMKSRNLTDRCRCPVNTFVHESLADV     |
| P00668 | DSNPSSVSSNYCNQMMKSRNLTDRCRCPVNTFVHESLADV     |
| P00673 | AVCSQKNVLCNGRNTCYESNSTMHITDCRQTGS SKYPNCA    |
| P61823 | VLLSLLVLLVLLVVRVQPSLGKETAATAAKFERQHMDSSSTAAS |
| P61823 | VLVLLVVRVQPSLGKETAATAAKFERQHMDSSSTAASSNYCN   |
| P61823 | DSSTSAASSNYCNQMMKSRNLTKDRCKPVNTFVHESLADV     |
| P61823 | TSAASSNYCNQMMKSRNLTKDRCKPVNTFVHESLADVQAV     |
| P61823 | SSSNYCNQMMKSRNLTKDRCKPVNTFVHESLADVQAVCSQK    |
| P00657 | DSSTSSASSNYCNQMMKSRNMTSDRCRCPVNTFVHESLADV    |
| P00664 | DPSPSSASSNYCNQMMQSRNLTDRCRCPVNTFVHESLADV     |
| P67926 | DSSTSSASSNYCNQMMKSRNLTDRCRCPVNTFVHESLADV     |
| P00675 | DSSGSPSTNANYCNEMMKGRNMTQGYCKPVNTFVHEPLADV    |
| P00685 | DSGSSLSSSDYCNKMMKVRNMTQESCKPVNTFVHESLQDV     |
| P00659 | BSSTSSASSBYCBZMMKSRNLTDRCRCPVNTFVHZSLABV     |
| P00662 | DSSTSSVSSNYCNEMMTSRNLTDRCRCPVNTFVHESLADV     |
| P00672 | DTSSSLNDSNYCNQMMVRRNMTQDRCKPVNTFVHESEADV     |
| P00674 | DSGSTSSNPTYCNQMMKRRNMTQGWCKPVNTFVHEPLADV     |
| P00674 | PVNTFVHEPLADVQAICLQKNITCKNGQSNQYQSSSMHIT     |
| P07998 | DSDSPPSSSTYCNQMMRRRNMTOGRCKPVNTFVHEPLVDV     |
| P07998 | NVCFQEKVTCNKGQNCYKSNS SMHITDCRLTNGSRYPNCA    |
| P07998 | GQNCYKSNS SMHITDCRLTNGSRYPNCA YRTSPKERH IIV  |
| P04060 | DSSGSPSSNSNYCNEMMRNRNMTQDRCKPVNTFVHEPLADV    |
| P00682 | DSTVATSSSPTYCNQMMKRRNMTQGYCKPVNTFVHESLADV    |
| P00676 | DSRGSPSTNPNYCNEMMKSRNMTQGRCKPVNTFVHEPLADV    |
| P00671 | DPDSSSNSSNYCNLMSRRNMTQGRCKPVNTFVHESLADV      |

|        |                                             |
|--------|---------------------------------------------|
| P00671 | AVCSQINVNCKNGQTNCYQSNSTMHITDCRQTGSSSKYPNCA  |
| P04059 | DSSGSPSTNPNYCNAMMKSRNMTQERCKPVNTFVHEPLADV   |
| P19644 | DSGSSPSSSSTYCNQMMKLRNMTQGSCCKSVNTFVHEPLVDV  |
| P16414 | SIDS PGNLSPTYCNQMLLRNMTKGSCCKPVNTFVHEPLKDI  |
| P67927 | DSSTSSASSSNYCNQMMKSRNLTQDRCKPVNTFVHESLADV   |
| P10153 | SLHVKPPQFTWAQWFETQHIINMTSQQCTNAMQVINNYQRRC  |
| P10153 | NQNTFLLTTFANVVVNCGNPNMTCPSNKTRKNCHHSGSQVP   |
| P10153 | LTTFANVVVNCGNPNMTCPSNKTRKNCHHSGSQVPLIHCNL   |
| P10153 | SNKTRKNCHHSGSQVPLIHCNLTTSPQNI SNCRYAQT PAN  |
| P10153 | HHSGSQVPLIHCNLTTSPQNI SNCRYAQT PANMFYIVACD  |
| P81649 | TIQHIQPSPLQCCKAMGVNNTYWHCKPQNTFLHDSFDVA     |
| P81649 | PQNTFLHDSFDVATACNLPNI TCKNGQNNCHQSAKPVSLT   |
| P81649 | CKNGQNNCHQSAKPVSLTQCNEFTGGNYPCRYKDAAYKFF    |
| P39873 | PVNTFVHESLDDVKAVCSQKNI TCKNGHPNCYQSKSTMSIT  |
| O43567 | LINSKPENACEFIVPPPVDNSSGTFIVLIRRLDCNFDIKV    |
| P19791 | WPDNCDGSYQEYCDSDREYSNITS ILEAQDRTELLSYMKEY  |
| Q7SID5 | VLTWPASFYANHCERIAPNNFTI HGLWPDNVKTRLHNCKP   |
| P00679 | DEGSPSNSSNYCNVMMIRRNMTQGRCKPVNTFVHESLADV    |
| O80322 | RNGPDPEKCKTTALNSQKIGNMTAQLEI IWPVNLNRSDHVG  |
| O80322 | NSQKIGNMTAQLEI IWPVNLNRSDHVGFEKEWIKHGTCGY   |
| O80322 | IKDDMHYLQTVIRMYITQKQNVSA ILSKAAIQPNGTNRPLV  |
| O80322 | MYITQKQNVSA ILSKAAIQPNGTNRPLVDIENAIRRGTNNT  |
| O80322 | QPNGTNRPLVDIENAIRRGTNNTKPKFKCQKNTRTTTELVE   |
| P04007 | LVLTPWITFCRIKHCERTPTNFTI HGLWPDNHTTMLNYCDR  |
| P04007 | RIKHCERTPTNFTI HGLWPDNHTTMLNYCDR SKPYNMFTDG |
| P04007 | LSSLRNHGISRGSYTVQNLNNTI KAITGGFFNLTC SRLRE  |
| Q40965 | KTKRYRKIQRLEPQLEI IWPVNSDRKANRGFWRKQWYKHGS  |
| Q40965 | LPNQKHYFETVIRMF LAEKQNVSRILSMATIEPEGKNRTLL  |
| Q40965 | AEKQNVSRILSMATIEPEGKNRTLEIQNAIRAGTNNMIPK    |
| Q40965 | KCQKVNMGTELVETLCHDSNLTQFINCPRLPQASPYFCP     |
| O80323 | TVGYDYFQFTQQYQLAVCN SNRTLCKDPPDKLFTVHGLWPS  |
| O80323 | IDNENHYFETVIKMYISKQNVSRILSKAKIEPDGKKRALL    |
| Q40966 | RNGPDPEKCKTTMNSQKIGNMTAQLEI IWPVNLNRSDHVG   |
| Q40966 | NSQKIGNMTAQLEI IWPVNLNRSDHVGFWEREWLKHGTCGY  |
| Q40966 | IKDDMHYLKTVIKMYITQKQNVSA ILSKATI QPNGNNSLV  |
| Q40966 | TQKQNVSA ILSKATI QPNGNNSLVDIENAIRSGNNTKPK   |
| Q40966 | QPNGNNSLVDIENAIRSGNNTKPKFKCQKNTRTTTELVE     |
| P93460 | TVGYDYFQFTQQYQLAVCN SNRTPCKDPPDKLFTVHGLWPS  |
| P93460 | IDNENHYFETVIKMYISKQNVSRILSKAKIEPDGKKRALL    |
| O80324 | FTVHGLWPSNDVGD DPIYCKNKTIKSQQIGNLTAQLII IWP |
| O80324 | DVGD DPIYCKNKTIKSQQIGNLTAQLII IWPVLDRTDHVG  |

|        |                                             |
|--------|---------------------------------------------|
| 080324 | IKDEMHYFKTVIKMYITQKQNVSEILSRAKIEPEGKIRRRD   |
| 080324 | INAIRLGTKDKKPKLKCQKNNQTTELVEITICSDRNLQFI    |
| 080324 | KCQKNNQTTELVEITICSDRNLQFIDCPRSSFKGS PFHCP   |
| Q40381 | LVLQWPTAFCHTTPCKRI PNNFTIHGLWPDNVSTTLNYCAA  |
| Q40381 | HTTPCKRI PNNFTIHGLWPDNVSTTLNYCAAENFKNI EDD  |
| Q40381 | SLRNHGII PGRGMKYTVQKINSTIKKITQGYFNL SCKTGIM |
| 080325 | DKLFTVHGLWPSNLNGPHPENCTNATVNP HRIKNIQAQLKI  |
| 080325 | FTVHGLWPSNLNGPHPENCTNATVNP HRIKNIQAQLKI IWP |
| 080325 | VGFWNKQWIKHGSCGYPAIMNDTHYFQTVINMYITQKQNV S  |
| 080325 | IMNDTHYFQTVINMYITQKQNVSEILSKAKIEPLGIQRPLV   |
| 080325 | AKIEPLGIQRPLVHIENAIRNSTNNKPKFKCQKNSGVTEL    |
| P10281 | AAGAVFEFPSCPDKIPFSCQNSTAVADSCCFNSPGGALLQT   |
| P10281 | WPDNCDGSYGQFCDKSREYSNITAILQEQRTELLSYMKKY    |
| O00584 | RDPPDYWTIHGLWPKSEGCNRSWPFNLEEIKDLLPEMRAY    |
| O00584 | IKDLLPEMRAYWPDVHSFPNRSRFBWHEWEKHGTCAAQVD    |
| O00584 | EVQTIQIIECLTKDQQLQNCTEPGEQSPKQEVWLANGA      |
| P24657 | WPDNCDGSFPQTC DASRAYTNI TDILTAMGADDTLQYMQTY |
| Q8WZ75 | QEPQDYTEFVELLAVRIQLENVTLNPDPAEGPKPRPAVWL    |
| Q8WZ75 | LRLPEKVPSPAPPQEVTLKPGNGTVFVSWVPPAENHNGIIR   |
| Q8WZ75 | PPAENHNGIIRGYQVWSLGNTSLPPANWTVVGEQTQLEIA    |
| Q8WZ75 | NGIIRGYQVWSLGNTSLPPANWTVVGEQTQLEIATHMPGSY   |
| Q8WZ75 | LRGSHSLELRACELGNRGSKNLSQSPGAVPQALVAWRALGP   |
| Q8I7I5 | RNLAYPLDSGEVHWTGLAEYNYSSRISSCRHGCEVDDERES   |
| Q8I7I5 | KPLNGILGWRWTSLPQNSFRNSLSSEVHVPFEGHEHVEVR    |
| Q8I7I5 | YVNQVEIELVSVASSRLIFSNGTHLESEIDQYALGDSATV    |
| Q8I7I5 | DTTIAIGSSKGLWTYQMSANQTDDEDQSSVIQLKTVGEMD    |
| Q8I7I5 | GHVYTLNADNKVYRTEMVAFNATGIETVASIQYLQDMSFSN   |
| Q8I7I5 | SPSNGIFFDVSKFLLYSALQNGSMMTLNPVTDHVHIFKDVG   |
| Q8I7I5 | RVSWDESNTLPFQAQGSWRNFYFLKVTAPDITDFSPIEI     |
| Q8I7I5 | IPADDSVKIVEKLQYPHVLDNNTKTVYLAGDHSMGIFKKYL   |
| Q8I7I5 | VMGISSDDTTGMVHFLTQARNGTITLWESDPENRTPRDIAS   |
| Q8I7I5 | IFREKMGQDPPPIITIQSETNFTIPSEVLEAWSSAQRFDVS   |
| Q8I7I5 | SAQRFDVSVQAMTPWATAVLNRTGLTAPVKPPTSPTQLRIF   |
| Q8I7I5 | ISFFWGPPSEWNGTPYQYIVNCTKDDGSGWIGGPVTTSSQSHY |
| Q8I7I5 | TDAKQLAYDPFMNTAYLLTKNGSLFALDMNKNTANLALTV    |
| Q8I7I5 | AGISVPTSIAVIALSETVSSNISDDTTSCLINPCRVKIANL   |
| Q8I7I5 | AVSSEAVARTLDVPGTLRPNVNTGSSLLLRWNGLEPEHRPS   |
| Q8I7I5 | SIAYQYRESGGANNEWQFPMNVSEFPDVTTELVPITNLLSA   |
| Q8I7I5 | KEPMSDGGSPITSYAVETRINKTAEWEIAERGLDGWKTWWR   |
| Q04912 | VPSFSAGGLVQAMVTYEGDRNESAVFVAIRNRLHVLGPDLK   |
| Q04912 | DDFFQSPSFCPNPPGLEALSPNTSCRHFPLLSSSSFSRVDLF  |

|        |                                                 |
|--------|-------------------------------------------------|
| Q04912 | LFNGLLGPVQVTALYVTRLDNVTVAHMGTM DGRILQVELVR      |
| Q04912 | DGRI LQVELVRS LN YLLYVS NFSLGDSGQP VQRDVSR LGDH |
| Q04912 | FVEE FECELE PLGTQAVGFTNVSLTVTNMPPGKHFRVDGTS     |
| Q04912 | TCLTLEGQSLSVGTSRAVLVNGTECLLARVSEGGQLLCATPP      |
| Q04912 | QQLCRLPEYVVRDPQGWVAGNLSARGDGAAGFTLPGFRFLP       |
| Q04912 | EHAIKFEY IGLGAVADCVGINVTVGGESCQHEFRGDMVVCP      |
| Q03691 | GNPRNPTCPMASLIYQHGTYNISENGTLVLNPIEVDGRQLF       |
| Q03691 | NPTCPMASLIYQHGTYNISENGTLVLNPIEVDGRQLFSDPC       |
| Q03691 | GRQLFSDPCNDGVSSTYSRYNQTETFKEYAVGIDPYHGIYT       |
| P04843 | SFKTILPAAAQDVYRDEIGNVSTSHLLILDDSVEMEIRPR        |
| P04844 | SLFYAAQASQALSGCEISISNETKDLLLAAVSESSVTQIY        |
| Q9BZR6 | IFLHGNRISHVPAASFRACRNLTILWLHSNVLARIDAAAF        |
| Q9BZR6 | IYLLQDNALQALPDDTFRDLGNLTHLFLHGNRISSVPERAFR      |
| Q9HBX9 | YFSHGGGQDVKCSLGYFPCGNI TKCLPQLLHCNGVDDCGNQ      |
| Q9HBX9 | QGLELDCDETNLRAVPSVSSNVTAMSLQWNLIRKLPDCFK        |
| Q9HBX9 | QHMPRLHWLDLEGNHIHNLRLNLTIFISCSNLTVLVMRKNKIN     |
| Q9HBX9 | LDLEGNHIHNLRLNLTIFISCSNLTVLVMRKNKINHLENTFA      |
| Q9HBX9 | NKIENLPPLIFKDLKELSQLNLSYNPIQKIQANQFDYLVKL       |
| Q9HBX9 | LSLEGIEISNIQQRMFRPLMNLSHIYFKKFQYCGYAPHVRS       |
| P55012 | VVYIGIAVSVGSCVVRDATGNVNDTITTELTNCTSAACKLN       |
| P55012 | YIGIAVSVGSCVVRDATGNVNDTITTELTNCTSAACKLNFD       |
| P55012 | SCVVRDATGNVNDTITTELTNCTSAACKLNDFSYCESNTC        |
| Q9JIS8 | YAGGIKSI FDPVFPVCM LGNRTL SRDQFDICAKTVVVDNE     |
| Q9JIS8 | GNRTL SRDQFDICAKTVVVDNETVATRLWTFCHSPNLTAD       |
| Q9JIS8 | VVVDNETVATRLWTFCHSPNLTADSCDPYFLLNVTETPG         |
| Q9JIS8 | SFTVLVGIFFPSVTGIMAGSNRSGDLRDAQKSIPVGTILAI       |
| Q9WVL3 | YAGVIKTAFA PPDIPVCLLGNRTL ANRNFDTCAKMQVVSNG     |
| Q9WVL3 | GNRTL ANRNFDTCAKMQVVSNGTVTTALWRLFCNGSSLGAT      |
| Q9WVL3 | AKMQVVSNGTVTTALWRLFCNGSSLGATCDEYFAQNNVTEI       |
| Q9WVL3 | RLFCNGSSLGATCDEYFAQNNVTEIQGIPGVASGVFLDNLW       |
| Q99MR3 | LLVSGSLASVLVSFVAVGFRNI PLAPRPGTNASSVPHRHGH      |
| Q99MR3 | LVSFVAVGFRNI PLAPRPGTNASSVPHRHGHFTGFNGSTLR      |
| Q99MR3 | PRPGTNASSVPHRHGHFTGFNGSTLRDNLGAGYAEDYTGA        |
| Q9JIP7 | YYGMRALLVLYFRNFLGWDDNLSTAIYHTFVALCYLTPILG       |
| Q9JIP7 | LPVFPGGNQVQIKVLNIGNNNMTVHFPGNSVTLA QMSQTD       |
| Q9JIP7 | AQMSQTDTFMTFDIDKLT SINISSSGSPGVTTVAHDFEQGH      |
| Q9JIP7 | LNEMVTIKMSGKYENVTSHNASGYQFFPSGEKQYINTTA         |
| Q9JIP7 | TSHNASGYQFFPSGEKQYINTTAVAPTCLTDFKSSNLDFG        |
| Q9BZV2 | FSMMPSEFFLIPYLSGPDKNLTSAEITNEIFPVWTYSYLV        |
| Q9BZV2 | VTLAAYTAGSVLAQLLVS LANMSYFYLNVISLASVSVAFLE      |
| P21453 | KAHRSSVSDYVNYDIIVRHYNYTGKLNISADKENSIKLTSV       |

|        |                                             |
|--------|---------------------------------------------|
| P21453 | VSDYVNYDIIVRHYNYTGKLNISADKENSIKLTSVVFLIC    |
| Q08357 | LLGAKVGETIRKGIIDVNLNETVETLMAGEVSAMVGSVAV    |
| 076082 | LSSVFLIATPEHRCRVPDAANLSSAWRNHTVPLRLRDGREV   |
| 076082 | ATPEHRCRVPDAANLSSAWRNHTVPLRLRDGREVPHSCRRY   |
| 076082 | LRDGREVPHSCRRYRLATIANFSA LGLEPGRDVDLGQLEQE  |
| Q4U2R8 | IQVTLVVLP LLLMASHNTLQNFTAAPTHHCRPPADANLSK   |
| Q4U2R8 | TLQNFTAAPTHHCRPPADANLSKNGGLEVWLPDRRQGPPE    |
| Q4U2R8 | QQQPESCLRFTSPQWGLPFLNGTEANGTGATEPCTDGIYD    |
| Q4U2R8 | SCLRFTSPQWGLPFLNGTEANGTGATEPCTDGIYDNSTFP    |
| Q4U2R8 | GTEANGTGATEPCTDGIYDNSTFPSTIVTEWDLVCSHRAL    |
| Q8VC69 | IQVTMVVAP LLLMASHNTLQNFTAAPAHHCRPPANANLSK   |
| Q8VC69 | TLQNFTAAPAHHCRPPANANLSKDGLEAWLPDKQGRPE      |
| Q8VC69 | WLPLDKQGRPESCLRFPFPHNGTEANGTGATEPCLDGWVYD   |
| Q8VC69 | KQGRPESCLRFPFPHNGTEANGTGATEPCLDGWVYDNSTFP   |
| Q8VC69 | GTEANGTGATEPCLDGWVYDNSTFPSTIVTEWNLVCSHRAF   |
| Q8VC69 | VLILNYLQTAVSGTCAAYAPNYTVYCFRLLSGMSLAI       |
| Q9Y694 | REPDGTLSSCLRFAYPQALPNTTLGEERQSRGELEDEPATV   |
| Q9UHI7 | AKAILALERWKCPPEEEIYGNWSLPLNTSHIWHPRIREVQG   |
| Q9UHI7 | LERWKCPPEEEIYGNWSLPLNTSHIWHPRIREVQGAIMVSS   |
| P40879 | LSMMVGLAVSGAVSKAVPDRNATTLGLPNNNSNNSLLDDER   |
| P40879 | VSGAVSKAVPDRNATTLGLPNNNSNNSLLDDERVRVAAAAS   |
| P40879 | VSKAVPDRNATTLGLPNNNSNNSLLDDERVRVAAAASVTVL   |
| Q62674 | CVAGILYVPRGVEVDCVSLLNQTVSSSSFEVYLCCRQVFQS   |
| Q99808 | PWNFFMTATQYFTNRLDMSQNVSLVTAELSKDAQASAAPAA   |
| Q14542 | PWNFFITAIPIYFQARLAGAGNSTARILSTNHTGPEDAFNFN  |
| Q14542 | PYFQARLAGAGNSTARILSTNHTGPEDAFNFNWVTLLSQL    |
| Q14542 | MSIVCYLSLPHLKFARYY LANKSSQAQAELETKAELLQSD   |
| Q9JIM1 | PWNFFMTATKYFTNRLDVSQNVSSDTQSCSTKALADPTV     |
| Q969I6 | VIYKKFQIPCPLPVL DHSVGNLSFNNTLPMHVVMLPNNSES  |
| Q969I6 | KFQIPCPLPVL DHSVGNLSFNNTLPMHVVMLPNNSESDVN   |
| Q969I6 | HSVGNLSFNNTLPMHVVMLPNNSESDVNFMMDYTHRNPAG    |
| Q13433 | DLAISTRQYHLQQLFYRYGENNSLSVEGFRKLLQNI GIDKI  |
| Q13433 | LAISTRQYHLQQLFYRYGENNSLSVEGFRKLLQNI GIDKIK  |
| Q13433 | STPPSVTSKSRVSRLAGRKTNE SVSEPRKGFMYSRNTNENP  |
| Q13433 | EPRKGFMYSRNTNENPQECFNASKLLTSHGMGIQVPLNATE   |
| Q13433 | ECFNASKLLTSHGMGIQVPLNATEFNLYLCPAI INQIDARSC |
| Q13433 | SAMLAYLGMATGIFIGHYAENVSMWIFALTAGLFMYVALVD   |
| Q8C145 | DLAVTMQRHHLQQLFYRYGENNSLSVEGFRKLLQNI GIDKI  |
| Q8C145 | PSITEKSRVGRLSRLARKKSNE SVSEPRKGFMYSRNTNDNI  |
| Q8C145 | EPRKGFMYSRNTNDNIQECFNATKLLTSHGMSIQALLNATE   |
| Q8C145 | ECFNATKLLTSHGMSIQALLNATEFNLYLCPAI INQIDARAC |

|        |                                            |
|--------|--------------------------------------------|
| Q8C145 | SAMLAYLGMATGIFIGHYAENVSMWIFALTAGLFMYVALVD  |
| Q6P5F6 | LHDRNHRFHRRRLHHHLDHNTTRHVHNDsvAHSEHGEPGH   |
| Q6P5F6 | FHHRHRLHHHLDHNTTRHVHNDsvAHSEHGEPGHSPSPETN  |
| Q6P5F6 | NDSVAHSEHGEPGHSPSPETNKTEQSEVKSvkVRRKEK GK  |
| Q6P5F6 | IYSTPSHKDQSEDDRQHECLNVTQLLKHFGGLGPNSPISPDL |
| Q15043 | LTLQQLKALLNHLDVGVGRGNVTQHVQGHRNLSTCFSSGDL  |
| Q15043 | VQGHRNLSTCFSSGDLFTAHNfSEQSRIGSSELQEFcPTIL  |
| Q75N73 | GLPPLSATSfLEDLMdryGKNDsLTLTQLKSLLDHLHVGVG  |
| Q75N73 | LTLTQLKSLLDHLHVGVGRDNVSQPKegPRNLSTCFSSGDL  |
| Q75N73 | DHLHVGVGRDNVSQPKegPRNLSTCFSSGDLFAAHNLSERS  |
| Q75N73 | KEGPRNLSTCFSSGDLFAAHNLSERSQIGASEfQEFcPTIL  |
| Q9Y6R1 | YNTLFsCTCVPPDPANISISNDTTLAPEYLPTMSSTDMYHN  |
| Q9Y6R1 | NDTTLAPEYLPTMSSTDMYHNtTFDwAFLSKKECSKYGGNL  |
| Q9JI66 | YNTHfSACCLPPDPVNLsvSNDTTLAPEDLPTVSSTDMYHN  |
| Q9JI66 | NDTTLAPEDLPTVSSTDMYHNATFDWAYLSKKECVKFGGKL  |
| Q9Y6M7 | KPYVATLSLHSLfELRSCILNGTVMLDMRASTLDEIADMVL  |
| Q9Y6M7 | RNGEGLSASRHSRLTGLSASNLSLRGESPLSLLLGHLLPSS  |
| Q9Y6M7 | ASPQsAPGNLDNSKSGEIKGNsgGSRENStVDFSKVDMNF   |
| Q9Y6M7 | NLDNSKSGEIKGNsgGSRENStVDFSKVDMNFMRKIPTGA   |
| Q9Y6M7 | NNLDKLTsYSCVCTEPPNfSNETLAQWKKDNITAHNISWRN  |
| Q9Y6M7 | CVCTEPPNfSNETLAQWKKDNITAHNISWRNLTVSECKLR   |
| Q9Y6M7 | PPNfSNETLAQWKKDNITAHNISWRNLTVSECKLRGVFLG   |
| Q8BTY2 | KPYVATLSLHSLfELRSCILNGTVMLDMRASTLDEIADMVL  |
| Q8BTY2 | NLDNSKSGEMKGNsgGSRENStVDFSKVDMNFMRKIPTGA   |
| Q8BTY2 | NNLDELTSYTCVCAEPSNfSNETLELWKRKNITAYSVSWGN  |
| Q8BTY2 | CVCAEPSNfSNETLELWKRKNITAYSVSWGNLTVSECKTFH  |
| Q8BTY2 | NETLELWKRKNITAYSVSWGNLTVSECKTFHGfMfVGSACGP |
| P35542 | KLISRsvYLQGLIDCYLFGNSSTVLEDSKsNEKAEEWGRS   |
| P20840 | IREGDEFTLSMPHVYRIKLLNSQTATISLADGTEAFKCYV   |
| P20840 | ADGTEAFKCYVsQQAAyLYENTTFCTAQNDLSSyNTIDGS   |
| P20840 | TAQNDLSSyNTIDGSITfSLNFSDGGSSyEYELENAKFFKS  |
| P20840 | SSVQVYSSNDfNDWwFPQSYNDTNADVTCFGSNLWITLDEK  |
| P20840 | NVNTIDHALEfQYtCLDTIANTTYATQfSTTREFIVYQGRN  |
| P20840 | LTSINTsAYSTGSISTVETGNRTTSEVISHVVTSTKLSPT   |
| P20840 | SPTATSLTIAQTSIYSTDSNITVGTDIHTTSEVISDVETI   |
| P20840 | WTGAMNTYISQFTSSSFATINStPIISSAVFETSdASIVN   |
| P20840 | ISSAVFETSdASIVNVHTENITNTAAVPSEEPfVFNATRn   |
| P20840 | VHTENITNTAAVPSEEPfVFNATRnSLNSfCskQPSSPSS   |
| P20840 | SSLIAYPSSASGSQLSGIQQNFTSTSLMISTYEGKASIFFS  |
| P81608 | ENIEENGSMRVfVEHIRVLDNSsLAFKfQRKvNGECTDFYA  |
| P02743 | PRESVTDHVNLITPLEKPLQNFTLCFRAYSdLSRAYSLFSY  |

|        |                                               |
|--------|-----------------------------------------------|
| P12246 | PRESETDHVKLI PHLEKPLQNFTLCFRTYSDLSRSQSLFSY    |
| P17900 | KDPAVIRSLTLEPDPIIVPGNVTL SVMGSTSVPLSSPLKVD    |
| Q8C1C1 | GAVCHDCVQLISLLQDALESNLT LAEVTVQNQCQSMGPGLA    |
| Q8C1C1 | GLTCDVCLNLVQELDKWLVTNSTEALISHTLERVCTVVPEP     |
| P20097 | SVTCKACEYVVKVMELI DNNRTEEKIIHALDSVCALLPES     |
| P26779 | SLPCDICKDVITAAGNLLKDNATEQEILMYLERTCDWLPKP     |
| P26779 | ATEQEILMYLERTCDWLKPNMSASCKEIVDSYLPVILDMI      |
| P26779 | GNVCQDCIQLVTDVQEA LR TNSTFVEALVDHAK ECDRLGP   |
| P26779 | DIYCEVCEFVVKVAKLI DNNRTEEEILHALDKVCSKLP TS    |
| P26779 | GGFCEVCKKLVGYLDRNLEKNSTKEQILAALEKGC SF LDPQ   |
| P07602 | SLPCDICKDVVTAAGDMLKDNATEEEILVYLEKTCDWLPKP     |
| P07602 | ATEEEILVYLEKTCDWLKPNMSASCKEIVDSYLPVILDI I     |
| P07602 | GDVCQDCIQMVTDIQTAVRTNSTFVQALVEHVKE ECDRLGP    |
| P07602 | DVYCEVCEFLVKEVTKLI DNNKTEKEILDAFDKMCSKLP KS   |
| P07602 | GGFCEVCKKLVGYLDRNLEKNSTKEQILAALEKGC SF LDPD   |
| Q61207 | SLPCDICKTVVTEAGNLLKDNATQEEILHYLEKTCEWIHDS     |
| Q61207 | EDVCQDCMKLVSDVQTA VTKTNS SFIQGFVDHVKE DCDRLGP |
| Q61207 | VILCQTCQFVMNKFSELI VNNATEELLVKGLSNACALLPDP    |
| Q61207 | GGFCEVCKKLVLYLEHNLEKNSTKEEILAALEKGC SF LDPD   |
| P43007 | SNLVVAAFRTYATDYKVV TQNSSSGNVTHEKIPIGTEIEGM    |
| P43007 | AAFRTYATDYKVV TQNSSSGNVTHEKIPIGTEIEGMN I LGL  |
| O35874 | NSGPPPVSKETVDSFLDLLRNLFPSNLVVA AFTTSATDYTV    |
| O35874 | PVSKETVDSFLDLLRNLFPSNLVVA AFTTSATDYTVVTHNT    |
| O35874 | SNLVVAAFTTSATDYTVVTHNTSSGNVTKEKIPVVT DVEGM    |
| O35874 | AAFTTSATDYTVVTHNTSSGNVTKEKIPVVT DVEGMN I LGL  |
| P13866 | GYDAFMEKYMKA IPTIVSDGNTTFQEKCYTPRADS FHFIFRD  |
| P31641 | AWATYYLQSFQKELPWAHCNHSWNTPHCMEDTMRKNK SVW     |
| P31641 | WAHCNHSWNTPHCMEDTMRKNKSVWITISSTNFTSPVIEFW     |
| P31641 | HCMEDTMRKNKSVWITISSTNFTSPVIEFWERNVLSLSPGI     |
| P97260 | YHAKFLSSLRARLMLLHPSPNC SLRAENLVHVHFKEEIGIA    |
| P97260 | ASRPDPAFSIFPPDAPKLPENQTVPGELPEHAAPAEGVHDS     |
| P97260 | DEELWRRLSFRHWPTLFNYYNITLAKRYISLLPVIPVTLRL     |
| P21583 | I SEMVQLSDSLTDL LDKFSNISEGLSNYSIIDKLVNI VDD   |
| P21583 | YSIIDKLVNI VDDLVECVKENS SKDLKKSFKSPEPRLFTPE   |
| P21583 | KSFKSPEPRLFTPEEFFRIFNRSIDAFKDFVVAE TSDCVV     |
| P21583 | SRVSVTKPFMLPPVAASSLRNDSSSNRKAKNPPGDSSLHW      |
| P21581 | LRDMVTHLSVSLTTL LDKFSNISEGLSNYSIIDKLGKIVDD    |
| P21581 | CMEENAPKNVKESLKKPETRNFTPEEFFSIFNRSIDAFKDF     |
| P21581 | ESLKKPETRNFTPEEFFSIFNRSIDAFKDFMVA S D TSDCVL  |
| P21581 | SRVSVTKPFMLPPVAASSLRNDSSSNRKA KSPEDPGLQW      |
| P37089 | EELEELDRITEQTLFDLYKYNSYTRQAGARRRSRDLLGA       |



|        |                                            |
|--------|--------------------------------------------|
| P37089 | DNNPQVDRKDWKIGFQLCNQNKSDCFYQTYSSGVDVREWY   |
| P37089 | EALGNFIFTCRFNQAPCNQANYSKFHHPMYGNCYTFNDKNN  |
| P37089 | ANYSKFHHPMYGNCYTFNDKNNSNLWSSMPGVNNGLSLTL   |
| P37089 | ISMRKEALDSLGGNYGDCCTENGSDVPVKNLYPSKYTQQVCI |
| P37089 | SRWPSVKSQDWIFEMLSLQNNYTIINNKRNQVAKLNIFFKEL |
| Q14108 | VARVFQKAVDQSIIEKKIVLRNGTEAFDSWEKPLPVYTQFY  |
| Q14108 | EAFDSWEKPLPVYTQFYFFNVNPEEILRGETPRVEEVGP    |
| Q14108 | EVGPYTYRELRNKANIQFQDNGTTISAVSNKAYVFERDQSV  |
| Q14108 | SLIHVFRPDISPYFGLFYEKNGTNDGDYVFLTGEDSYLNFT  |
| Q14108 | EKNGTNDGDYVFLTGEDSYLNFTKIVEWNGKTSLDWWTDK   |
| Q14108 | VEWNGKTSLDWWTDKCNMINTDGDGDSFHPLITKDEVLYVF  |
| Q14108 | YESVQGLPAFRYKVPAEILANTSDNAGFCIPEGNCLGSGVL  |
| Q14108 | TSDNAGFCIPEGNCLGSGVLNVSICKNGAPIIMSPHFYQA   |
| Q14108 | LDDFVETGDIRTMVFPVMYLNESVHIDKETASRLKSMINTT  |
| Q14108 | YLNESVHIDKETASRLKSMINTTLIITNIPYIIMALGVFFG  |
| Q8WTV0 | EKPQVRERGYPVYREFRHKSNITFNNDTVSFLEYRTFQFQ   |
| Q8WTV0 | ERGPYVYREFRHKSNITFNNDTVSFLEYRTFQFQPSKSHG   |
| Q8WTV0 | MTLKLIMTLAFTTLGERAFMNRVGEIMWGYKDPLVNLINK   |
| Q8WTV0 | NKYFPGMFPFKDKFGLFAELNNSDGLFTVFTGVQNISRIH   |
| Q8WTV0 | LFAELNNSDGLFTVFTGVQNISRIHLVDKWNGLSKVDFWH   |
| Q8WTV0 | DKWGLSKVDFWHSQCNMINTSGQMPPFMTPESSLEFY      |
| Q8WTV0 | SGVFEGIPTYREVA PKTLFANGSIYPPNEGFCPCLESQIQN |
| Q8WTV0 | NGSIYPPNEGFCPCLESQIQNVSTCRFSAPLFLSHPHFLNA  |
| Q8WTV0 | PNQEAHSLFLDIHPVTGIPMNCVKLQLLSLYMKS VAGIGQT |
| O35114 | VARVFQKAVDQTIIEKNMVLQNGTKVFNSWEKPLPVYIQFY  |
| O35114 | KVFNSWEKPLPVYIQFYFFNVNPEEILQGEIPLLEE VGP   |
| O35114 | EVGPYTYRELRNKANIQFGENGTTISAVTNKAYVFERNQSV  |
| O35114 | FGENGTIISAVTNKAYVFERNQSVGDPNVDLIRTNIPLLT   |
| O35114 | SLVHIFKPDVSPNFGFLFYERNGTNDGEYVFLTGEDNYLNFS |
| O35114 | ERNGTNDGEYVFLTGEDNYLNFSKIVEWNGKTSLDWWTDT   |
| O35114 | VEWNGKTSLDWWTDTCNMINTDGDGDSFHPLISKDEVLYLF  |
| O35114 | FENVEGLPAFRYKVPAEILANTSENAGFCIPEGNCMDSGVL  |
| O35114 | TSENAGFCIPEGNCMDSGVLNISICKNGAPIIMSPHFYQA   |
| O35114 | LDDFVETGDIRTMVFPVMYLNESVLIDKETANQLKSVINTT  |
| O35114 | YLNESVLIDKETANQLKSVINTTLVVNIPYIIMALGVFFG   |
| P18828 | QIVAVNVPPEDQDGSDDSDNFSGSGTGALPDTLSRQTPST   |
| Q9N3X8 | EATNAAGADLASVWVKEGEANETVATEMSEDMGLEEEISM   |
| Q9N3X8 | VGPDNTGEYRCRVTVDGREENASAMLQIEKPAMPERVRAE   |
| Q9N3X8 | AMLQIEKPAMPERVRAELHNETMPAKVVRVWNEGFDGNEP   |
| Q9N3X8 | LGYVVRYRLAGYSSLTWNEKNLTTKDARNTLVDELITWREY  |
| Q9N3X8 | VTTSEGRPTQAPKNVRVKVLNSTAVAIEFTAPEQQRIPGVN  |

|        |                                                |
|--------|------------------------------------------------|
| Q9N3X8 | DPDRRQLTTVVNELEKFGHYNLTTLCFTTPGDGPRSNVVKV      |
| Q9N3X8 | HWAASSPDVKTKEVDGSTTNFTIDGLQPSTRYGVDMAST        |
| Q9N3X8 | IRQWVVEGKMADSSVFAHVFNVSAPKARSITVTGLRPFTQY      |
| Q9N3X8 | KSTWNSDAIGYRIHYREYPSNETWQMEEIAIRDEHEDKEEK      |
| Q9N3X8 | TYFFSVWAETSAGKGEQRSANVTIGPSKDGPPPPSKPQITS      |
| O97394 | AGSIFSEKSDVVVAYMGI FENTTEGRLTVISGHPAIFDMPP     |
| O97394 | RAKAINQLGKEESSAFVHLNVSGDPYIEVAPEIIVRPQDV       |
| O97394 | LKDGLAVETAGVRHTLNDPWNRTLALLQANS SHS GEYTCQV    |
| O97394 | AGVRHTLNDPWNRTLALLQANS SHS GEYTCQVRLRSGGYP     |
| O97394 | SASTWLRVKTSAPIMELPPQNV TALDGKDATIS CRAVGSPN    |
| O97394 | TALDGKDATIS CRAVGSPNPNI TWIYNETQLV DISSRVQIL   |
| O97394 | DATIS CRAVGSPNPNI TWIYNETQLVDI SSRVQILESGDLL   |
| O97394 | QAVRASDVGSYACVVTSPGGNETRAARLSVIELPFPSPNVK      |
| O97394 | PFPPSNVKVERLPEPQQRSINVS WT PPGFDGNSPI SKFI IQR |
| O97394 | LEKFVGPVFDPLLNWITELSNVSADQRWILLENLKAATVYQ      |
| O97394 | LGYILRYRLFGYNNVPSYQNI TNEAQRNFLIQELI TWKDY     |
| O97394 | IKTKEGVPEAPPTNVKVEAINSTAARCRWTPPNPQQINGIN      |
| O97394 | IDPLAEQTAILGGLEKFTBYNISVLCFTDPGDGVASSQVAV      |
| O97394 | LTGYTVRYQVKDRPDTLKSFNLTADDELTVNQLQATTHYW       |
| O97394 | ALSNIEAFSVVLQFTPGFDGNSITKWKVEGQTARNMTWFT       |
| O97394 | PGFDGNSITKWKVEGQTARNMTWFTICEINDPDAETLTVT       |
| O97394 | PSEATKDFQTIQARPKHPFNVTVRAMSAQQLRVWIPLQQ        |
| O97394 | LRVRWIPLQQTEWYGNPRGYNISYKQLVKTPGTIKYVPRSV      |
| O97394 | TAVERTREAVPSYGPLDVQANATSSTTVVQWGEVPRQHRN       |
| O97394 | KVFYAAADRQQLHKTIPNNATFTTTLTELKKYVVYHVQV        |
| O97394 | ALSTPPIRVQTFEDTPGVPSNVSPDVS LTMARI IWDVPVD     |
| O97394 | WDVPVDPNGKILAYQVTTYTLNGSAMLNYSREFPPSDRTFRA     |
| O97394 | PNGKILAYQVTTYTLNGSAMLNYSREFPPSDRTFRATELLPG     |
| O97394 | TYETTEENEKFSKQVKQKVSNTTLRVQNLEEEVTTYFTVRA      |
| O97394 | TYFTVRAQTSVDYGPGISENVTTGPQDGSVPAPRDILITK       |
| Q9UBV2 | AKRRQMQEAEEMMYQTGMKILNGSNKKSQKREAYRYLQKAAS     |
| Q9UBV2 | SNKKSQKREAYRYLQKAASMNHTKALERSYALLFGDYLPQ       |
| Q9UBV2 | EGSPKGTALGFLYASGLGVNSQAKALVYYTFGALGGNLI        |
| Q9UBV2 | HAMAFLGKMYSEGSDIVPQSNETA LH YFKKAADMGNPVGQS    |
| Q9UBV2 | VAQSNAAFILDQREASIVGENETYPRALLHWNRAASQGYTV      |
| Q9BYH1 | YIDSSDYPLLPLNFLECTYNVTYTYGYVELQVKS VNLS D      |
| Q9BYH1 | CTYNVTYTYGYVELQVKS VNLS D GELLSIRGVDGPTLTVL    |
| Q9BYH1 | SDGELLSIRGVDGPTLTVLANQTLVLEGQVIRSPNTTISVY      |
| Q9BYH1 | AHFHCHLGYEIQGAKMLTCINASKPHWSSQEPICSA PCGGA     |
| Q9BYH1 | KPHWSSQEPICSA PCGAVHNATIGRVLSPSPY PENTNGSQF    |
| Q9BYH1 | GAVHNATIGRVLSPSPY PENTNGSQFCIWTIEAPEGQKLHLH    |

|        |                                             |
|--------|---------------------------------------------|
| Q9BYH1 | HFERLLLHDKDRMTVHSGQTNKSALLYDSLQTESVPFEGLL   |
| Q9BYH1 | NIRFEAFEKGHCYEPYIQNGNFTTSDPTYNIGTIVEFTCDP   |
| Q9BYH1 | HSLEQGPAIIECINVRDPYWNDEPLCRAMCGGELSAVAGV    |
| Q9BYH1 | CIWKIHVGEKRIFLDIQFLNLSNSDILTIYDGDEVMPHIL    |
| Q9BYH1 | AGLIFGKGQGFIMNYIEVSRNDSCSDLPEIQNGWKTTSHTE   |
| P30650 | DKICNCYNREYVYNIPEFALNSSRIKPLNHLRLDPPLPFQF   |
| Q14242 | EYEYLDYDFLPETEPPEMLRNSTDTPPLTGPPTPESTTVEP   |
| Q14242 | TGLDAGGAVTELTTELANMGNLSTDAAMEIQTTQPAATEA    |
| Q14242 | LFIFPFSVSSVTHKGIPMAASNLVSNYPVGAPDHI SVKQCLL |
| Q95XP4 | AGALFVGSEGAIFRLWAYNINDTGENVFAKKQLVLSESEES   |
| Q95XP4 | LRDQQEPRTEIGICVVDPTFNFTAVVVDSGNPEDATSVYSG   |
| Q95XP4 | DIGGRNVLRQVWTSFVKARLNCV SANFFPYFDHIQSVKRV   |
| Q24323 | EDRDTLYVGAMDRVFRVNLQNISSSNCNRDVINLEPTRDDV   |
| Q24323 | DRLYVCGTNAHNPKDYVIYANLTHLPRSEYVIGVGLGIACK   |
| Q24323 | SEYVIGVGLGIACKPYDPLDNSTAIYVENGNPGLPGLYSG    |
| Q24323 | SGTNAEFTKADTVIFRTDLYNTSAKRLEYKFKRTLKYDSKW   |
| Q24323 | DVGGKNLLAHNWTYKARLNCISGEPFFYFNEIQSVYQL      |
| Q24323 | SAWLPVLNSRVPEPRPGTCVNDTSNLPDVLNFI RSHPLMD   |
| Q24323 | WDKEANTCRPYELDLLQDVANETS DICDSSVLKKKIVVTYG  |
| Q24323 | NEADGGRYDCHLGGSLCSYNI TVDAHRCTPPNKSNDYQKI   |
| Q24323 | GGSLCSYNI TVDAHRCTPPNKSNDYQKIYSDWCHEFEKYK   |
| O08665 | KLSYKEMLESNNVITFNGLANSSSYHTFLLDEERSRLYVGA   |
| O08665 | WAGKDILKECANFIKVLEAYNQTHLYACGTGAFHPICTYIE   |
| O08665 | QHHDNHGSPLEERIIYGVENSSTFLECSPKSQRALVYWQF    |
| Q62179 | PRISVPLGSEERLIRKFEAENISNYTALLSQDGKTLVYGA    |
| Q62179 | SVPLGSEERLIRKFEAENISNYTALLSQDGKTLVYGAREA    |
| Q62179 | SQDGKTLVYGAREALFALSNLSFLPGGEYQELLWSADADR    |
| Q62179 | FKGKDPKRDQNYIKILLPLNSSHLLTCGTAAFSPLCAYIH    |
| Q62179 | QVPTPRPGACITNSARERKINSSQLPDRVLNFKDHF LMD    |
| Q62179 | SHGGLLYASSHSGVVQVPVANC SLYPTCGDCLLARDPYCAW  |
| Q62179 | LASRPWTQDIEGASVKELCKNSSYKARFLVPGKPKQVQIQ    |
| Q62179 | ACPLLSNLATRLWVHNGAPVNASASCRVLP TGDLLVGSQQ   |
| Q62179 | VMEEGVMDQKNQRDGT PVIINTSRVSAPAGGRASWGADKSY  |
| Q9NPR2 | SLPLGSEERPFLRFEAEHISNYTALLSRDGR TLYVGAREA   |
| Q9NPR2 | SRDGR TLYVGAREALFALSSNLSFLPGGEYQELLWGADAEK  |
| Q9NPR2 | HLFTCGTAAFSPMCTYINMENFTLARDEKGNV LLEDGKGRC  |
| Q9NPR2 | PVPTPRPGACITNSARERKINSSQLPDRVLNFKDHF LMD    |
| Q9NPR2 | THRGLLYAASHSGVVQVPMANCSLYRSCGDCLLARDPYCAW   |
| Q9NPR2 | ACPLLSNLATRLWLRNGAPVNASASCHVLP TGDLLVGTQQ   |
| O35464 | LHCAGAGFPEDSEPI SISHGNYTKQYPV FVGHKPGRNTTQR |
| O35464 | ISHGNYTKQYPV FVGHKPGRNTTQRHRLDIQMIMMNR TLY  |

|        |                                              |
|--------|----------------------------------------------|
| 035464 | KPGRNTTQRHRLDIQMIMIMNRRLTYVAARDHIYTVDIDTSH   |
| 035464 | MGGSRVLEKQWTSFLKARLNCSVPGDSHFYFNI LQAVTDV    |
| 035464 | TMVRYRLTKIAVDNAAGPYQNHTVVFLGSEKGIILKFLARI    |
| 035464 | GSEKGIILKFLARIGSSGFLNGSLFLEEMNVYNPEKCSYDG    |
| Q92854 | RITWEHREVHLVQFHEPDIYNY SALLSEDKDTLYIGAREA    |
| Q92854 | LLSEDKDTLYIGAREAVFAVNALNISEKQHEVYWKVSEDKK    |
| Q92854 | EDKDTLYIGAREAVFAVNALNISEKQHEVYWKVSEDKKAKC    |
| Q92854 | SATSLYVCGTNAFQPACDHLNLT SFKFLGKNEDGKGRCPFD   |
| Q92854 | GELYSGTSYNFLGSEPIISRNS SHSPLRTEYAIPWLNEPSF   |
| Q92854 | FYALFTPQLNNVGLSAVCAYNLSTAEVFSHGKYMOSTTVE     |
| Q92854 | NGPVFKPRPGACIDSEARAANYTSSLNLPDKTLQFVKDHPL    |
| Q92854 | LMDDSVTPIDNRPLIKKDVNYTQIVVDRTQALDGTVDVM      |
| Q92854 | VLKAESPKYGLMGRKNLLIFNLSEGD SGVYQCLSEERVKNK   |
| Q92854 | FNLSEGD SGVYQCLSEERVKNKTVFQVVAKHVLEVKVVPKP   |
| 009126 | RLTWEHGEVGLVQFHKPGIFNY SALLMSEDKDTLYVGAREA   |
| 009126 | EDKDTLYVGAREAVFAVNALNISEKQHEVYWKVSEDKKSKC    |
| 009126 | SSTSLYVCGTNAFQPTCDHLNLT SFKFLGKSEDGKGRCPFD   |
| 009126 | GELYSGTSYNFLGSEPIISRNS SHSPLRTEYAIPWLNEPSF   |
| 009126 | NGPVPTPRPGACIDSEARAANYTSSLNLPDKTLQFVKDHPL    |
| 009126 | LMDDSVTPIDNRPKLIKKDVNYTQIVVDRTQALDGTVDVM     |
| 009126 | ELKAASPKYGFVGRKHLLIFNLSDGD SGVYQCLSEERVKNK   |
| 009126 | FNLSDGD SGVYQCLSEERVKNKTVSOLLAKHVLEVKMVPT    |
| 075326 | SSVWVGGRKVYLFDFPEGKNASVRTVNI GSTKGSCLDKRD    |
| 075326 | SEGLLACGTNARHPSCWNLVNGTVVPLGEMRGYAPFSPDEN    |
| 075326 | DKIYFFREDNPDKNPEAPLNVSRVAQLCRGDQGGESSLSV     |
| 075326 | PDPSGQRDTRVYGVFSNPWNYSAVCVYSLGDIDKVFRTSS     |
| 075326 | NVEQSCEPGHQSPNCILFIENLTAQQYGHYFCEAQEGSYFR    |
| P49908 | SLCKQPPAWSIRDQDPLNNSG SVTVVALLQASUYLCILQA    |
| P49908 | ILQASKLEDLRLVKLKEGYSNISYIVVNHQGISSRLKYTHL    |
| P49908 | KYTHLKNKVSEHIPVYQQEENQTDVWTL LNGSKDDFLIYDR   |
| P49908 | SEHIPVYQQEENQTDVWTL LNGSKDDFLIYDRCGRLVYHLG   |
| P49908 | LTFPYVEEAIKIAYCEKCGNCSLTTLKDEDFCKRVSLATV     |
| P49908 | UQCKENLPSLCSUQGLRAEENITESCQURLPPAAUQISQQL    |
| P25236 | LLQASRLEDLRIKLENQGYFNISYIVVNHQGPSQLKHAHL     |
| P25236 | LTFPYVEEAIKIAYCEKCGNCSFTSLEDEAFCKNVSSATA     |
| P25236 | CEKRCGNCSFTSLEDEAFCKNVSSATASKTTEPSEHNHKK     |
| Q12884 | SRVHNSEENTMRALTLKDILNGTFSYKTFPPNWI SGQEYLH   |
| Q12884 | ADNNIVLYNIETGQSYTILSNRTMKS VNASN YGLSPDRQFV  |
| Q12884 | YNIETGQSYTILSNRTMKS VNASN YGLSPDRQFVYLES DYS |
| Q12884 | ATKYALWVSPNGKFLAYAEFNDDIPVIAYSYGGDEQYPRT     |
| Q12884 | SWLTWVTDERVCLQWLKRVQNVSVLSICDFREDWQTDWCPK    |

|        |                                             |
|--------|---------------------------------------------|
| Q12884 | VYTERFMGLPTKDDNLEHYKNSTVMARAEYFRNVDYLLIHG   |
| Q9NRX5 | AMTNEPETNCNPSLSIIIGYNTTSTVPKEGQSVQWWHAQGI   |
| Q12874 | PNEICVPMSEVEFEELLKARENPFEEAQNLEVEFTDEEGYGRY |
| Q8N474 | EMLKCDKFPEGDVCIAMTPPNATEASKPQGTVCPPCDNEL    |
| P35248 | GPMGLSGLPGPRGPVGPKEGNGSAGEPGPKGERGLVGPPTS   |
| P02780 | CCYASGSGCSILDEVIRGTINSTVTLHDYMKLVKPYVQDHF   |
| Q16585 | TGNNQPIVFQQGTTKLSVENNKTSITSDIGMQFFDPRTQNI   |
| Q16585 | LPSGVKSLNVQKASTERITSNATSDLNIKVDGRAIVRGNEG   |
| Q16585 | TIEFHMGGNMELKAENSIILNGSVMVSTRLPSSSSGDLG     |
| O43556 | LGDFLGAVKNVWQPERLNAINITSALDRGGRVPLPINDLKE   |
| P04278 | SFCLNGLWAQGRQLDQALNRSHEIWTWSCPQSPGNGTDA     |
| P15196 | SFCLDGLWAQGGKLDMDKALNRSQDIWTHSPPSSPGNGTDT   |
| Q15465 | REPRERLLTAHLLFVAPHNDSATGEPEASSGSGPPSGGA     |
| P97797 | LKVTQPEKSVSVAAGDSTVLNCTLSLLPVGPIKWYRGVGO    |
| P97797 | VGQRLLIYSFTGEHFPRVTNVSDATKRNNMDFSIRISNVT    |
| P97797 | KPSPPEVSGPADRGIPDQKVNFTCKSHGFSPRNITLKWFKD   |
| P97797 | RGIPDQKVNFTCKSHGFSPRNITLKWFKDQELHHLETTVN    |
| P97797 | WFKDQELHHLETTVNPBGKNVSYNISSTVRVVLNSMDVHS    |
| P97797 | GQELHHLETTVNPBGKNVSYNISSTVRVVLNSMDVHSKVIC   |
| P97797 | KVICEVAHITLDRSPLRGIANLSNFIRVSPTVKVTQQSPTS   |
| P97797 | IRVSPVTKVTQQSPTSMNQVNLTCRAERFYPEDLQLIWLEN   |
| P97797 | TCRAERFYPEDLQLIWLENGNVSRRNDTPKNLTKNTDGTNY   |
| P97797 | EDLQLIWLENGNVSRRNDTPKNLTKNTDGTNYTSLFLVNSS   |
| P97797 | GNVSRNDTPKNLTKNTDGTNYTSLFLVNSSAHREDVVFTC    |
| P97797 | PKNLTKNTDGTNYTSLFLVNSSAHREDVVFTCQVKHDQQP    |
| P97797 | REDVVFTCQVKHDQQPATRNTVGLLAHSSDQGSMTFFPG     |
| P97797 | TVLGLAHSDDQGSMTFFPGNATHNWNVFIGVGVACALLV     |
| P78324 | QVICEVAHVTLQGDPLRGANLSETIRVPPTLEVTTQQPVRA   |
| P78324 | IRVPPTLEVTTQQPVRAENQVNVTCQVRKFPQRLQLTWLEN   |
| P78324 | TCQVRKFPQRLQLTWLENGNVSRTETASTVTENKDGTYNW    |
| P78324 | ASTVTENKDGTYNWSWLLVNVSAHRDDVKLTCQVEHGDQP    |
| P04148 | RGQIPSQYEIPVFQFEIPYFNATYVDHNLITRNHDQCRVSE   |
| P04148 | NVRTLKTVLTVDPCWLNFEENRTLAQHMSFKEDVLSFYIN    |
| P04148 | NRTLAQHMSFKEDVLSFYINGSYPLIRLTTVFDKGNFIDL    |
| Q9Y274 | EFDNIPCKKCVVVGNGGVLKNKTLGEKIDSYDVIIRMNNGP   |
| Q9Y274 | TTFRLFPESVSDPIHNDPNTTVILTAFKPHDLRWLLELL     |
| Q9Y274 | IAITLAFYICHEVHLAGFKYFNFDLKSPLHYGNATMSLMN    |
| Q9Y274 | HLAGFKYFNFDLKSPLHYGNATMSLMNKAYHNVTAEQLF     |
| Q9Y274 | SPLHYGNATMSLMNKAYHNVTAEQLFLKDIIEKNLVINL     |
| Q92187 | EHQETQLIGDGLSLSRSLVNSSDKIIRKAGSSIFQHNVEG    |
| Q92187 | KIIRKAGSSIFQHNVEGWKINSSLVLEIRKNIIRFLDAERD   |

|        |                                            |
|--------|--------------------------------------------|
| Q92187 | KSSFKPGDVIHYVLDRRRTLNI SHDLHSLLEPVSPMKNRRF |
| Q92187 | KSDFITMNPVQVQRAFGGFRNESDREKRVHRLSMLNDSVLW  |
| Q92187 | FGGFRNESDREKRVHRLSMLNDSVLWI PAFMVKGGEKHVEW |
| Q92187 | LNGKAVKYHYDDLKYRYFSNASPHRMPLEFKTLNVLHNRG   |
| O43173 | VPITNSLTQELQEKPSKWKFNRTAFLHQEQEILQHVDVIKN  |
| O43173 | NRTAFLHQEQEILQHVDVIKNFSLTKNSVRIGQLMHYDYSS  |
| O43173 | ISNNFRSLLPDVSPIMNKHYNICAVVGNISGILTGSQCQGEI |
| O43173 | VFRCNFAPTEAFQRDVGRTKNTLTFNPSILEKYNNLLTIQ   |
| Q9HAT2 | DPMKPGPFVEVMAQQTLEKINFTRLRVHDVLFQDVWLCSGQS |
| Q9HAT2 | GDVWLCSGQSNMQMTVLQIFNATRELSNTAAYQSVRILSVS  |
| Q9HAT2 | SVTGPSKHSVLWNAMIHPLCNMTLKGVVVYQGESNINYNND  |
| Q9HAT2 | LKGVVYQGESNINYNNDLYNCTFPALIEDWRETFHRGSQG   |
| Q9HAT2 | KQTVAYRLHLGARALAYGEKNLTFEGPLPEKIELLAHKGLL  |
| Q9HAT2 | LTFEGLPEKIELLAHKGLLNLTYQQIQVQKDNKIFEIS     |
| P15907 | PGPGIKFSAEALRCHLRDHVNVSMVEVTDFFPNTSEWEGYL  |
| P15907 | RCHLRDHVNVSMVEVTDFFPNTSEWEGYLPKESIRTKAGPW  |
| P13721 | PGPGVKFSVEALRCHLRDHVNVSMIEATDFFPNTTEWEGYL  |
| P13721 | RCHLRDHVNVSMIEATDFFPNTTEWEGYLPKENFRTKVGPW  |
| P13721 | KWYQKPDYFFETYKSYRRLNPSQPFYILKQPMPWELWDII   |
| Q96JF0 | DGDRLYSSMSRAFLYRLWKGNVSSKMLNPLQKAMKDYLT    |
| Q9GZC8 | LVIGLTQNNSTPSPITSSNSSVLVFEISSKMKMIEKLE     |
| Q9GZC8 | TTKTLNQLTFVVKPIGFFLNCSEQNISQFHVTLYSEDDIC   |
| Q9GZC8 | SNQKLTQKPIGFFLNCSEQNISQFHVTLYSEDDICANLIT   |
| Q9GZC8 | FHVTLYSEDDICANLITVPANESIYDRSVISDKTHNRRVLS  |
| Q9GZC8 | MFKSFRIFFVFIAPDDSGCSTNTRKSFNEKKKISFEFKKLE  |
| Q9GZC8 | TSRKSFNKSKKISFEFKKLENQSYAVPTALMMIFLTPCLL   |
| Q8CIF6 | PLCVLLVASVESHGALGPKNVSQKDAEFERTYADDVNSEL   |
| Q8CIF6 | EFERTYADDVNSELVNIYTFNHTVTRNRTEGVRVSVNVLNK  |
| Q8CIF6 | ADDVNSELVNIYTFNHTVTRNRTEGVRVSVNVLNKQKQAPL  |
| Q8CIF6 | YQRKYLQKVERTLCQPPTKNESEIQFFYVDVSTLSPVNTT   |
| Q8CIF6 | TKNESEIQFFYVDVSTLSPVNTTYQLRVNRVDNFVLRGTGEL |
| Q8CIF6 | QLRVNRVDNFVLRGTGELTFNTTAAQPPQYFKYFDPGVDVSV |
| Q8CIF6 | IAVFYALPVVQLVITYQTVVNVNVTGNQDICYNFLCAHPLGN |
| Q8CIF6 | NVTGNQDICYNFLCAHPLGNLSAFNNILSNLGYILLGLLF   |
| Q8CIF6 | AMGTALMMEGLLSACYHVCNPNYTFQFDTSEFMYIAGLCML  |
| Q8CIF6 | MYMIAGLCMLKLYQKRHPDINASAYSAYACLAIVIFFSVLG  |
| Q9Y286 | WAVQEESTRDRFHLLGDPQTKNCTLSIRDARMSDAGRYFFRM |
| Q9Y286 | FFRMEKGNIKWNYKYDQLSVNVNTALHTRPNILIPGTLESGC |
| Q9Y286 | ALHTRPNILIPGTLESGCQNLTCVSPWACEQGTPPMISWM   |
| Q9Y286 | QHHGTSLTCQVTLPGAGVTTNRTIQLNVSYPPQNLTVTVFQ  |
| Q9Y286 | LTCQVTLPGAGVTTNRTIQLNVSYPPQNLTVTVFQEGGTAS  |

|        |                                             |
|--------|---------------------------------------------|
| Q9Y286 | PGAGVTTNRTIQLNVSYPQNLTVTVFQEGGTASTALGNSS    |
| Q9Y286 | PQNLTVTVFQEGGTASTALGNSSLSVLEGQSLRIVCAVDS    |
| Q9Y286 | DEGEFTCRAQNSLGSQHVSINLSLQOEYTGKMRPVSGVLLG   |
| Q9H173 | ELNVVIETDMQIMVRLINKFNSSSSSLEEKIAALFDLEYV    |
| Q9H173 | MDNAQDLLSFGGLQVVINGLNSTEPVKEYAAFLVGAAFSS    |
| O00241 | QVICEIAHITLQGDPLRGATANLSEAIRVPPPLEVTQQPMRA  |
| O00241 | IRVPPTLEVTQQPMRAENQANVTCQVSNFYPRGLQLTWLEN   |
| O00241 | TCQVSNFYPRGLQLTWLENGNVSRTETASTLIENKDGTYNW   |
| Q9P1W8 | QVICEVAHVTLQGDPLRGATANLSEAIRVPPPLEVTQQPMRV  |
| Q9P1W8 | IRVPPTLEVTQQPMRVGNQVNVTCQVRKFYPPQLQLTWSEN   |
| Q9P1W8 | GNVCQRETASTLTENKDGTYNWTWFLVNI SDQRDDVVLTIC  |
| Q9P1W8 | ASTLTENKDGTYNWTWFLVNI SDQRDDVVLTICQVKHDGQL  |
| Q9Y3P8 | PRLRAVCLWTLTSAAMSRGDNCTDLLALGIPSIQAWGLWV    |
| Q03567 | RFALSLVMFFGCLVTYMMRTNMSFAVVCMVNENKTDTGVEK   |
| Q03567 | LVTYMMRTNMSFAVVCMVNENKTDTGVEKVSRCGKEMT PVE  |
| Q03567 | TDTGVEKVSRCGKEMTPVESNSSVIGEFDWDKQTTGMVLSS   |
| Q03567 | WGAYTMLVSLPSFLKDVGLGNLSSLGAVASIPYIAYFLAIN   |
| Q03567 | NTISALAGIISPAVSSYLTPNGTQEEWQMVWLWTAGILTIG   |
| P19634 | RSIGDVTTAPPEVTPESRPVNHVSVDHGMKPRKAFPVLGID   |
| Q92581 | YGLLVGLVLRVGIHVPSDVNNVTLSCVEQSSPTLLVTFDP    |
| Q8IVB4 | ESGTVYDCVKLTFSPSTLLVNI TDQVYEEKYKREISQHNIN  |
| Q96DU3 | VTLPLEFPAGEKVNFTIWLFNETSIAFIVPHETKSPEIHVT   |
| Q96DU3 | PHETKSPEIHVTNPKQGKRLNFTQSYSLQLSNLKMEDTGSY   |
| Q96DU3 | AKLSSYTLRILRQLRNIQVTNHSQLFQNMTCELHLTCSVED   |
| Q96DU3 | LRILRQLRNIQVTNHSQLFQNMTCELHLTCSVEDADDNVSF   |
| Q96DU3 | LFQNMTCELHLTCSVEDADDNVSRWEALGNTLSSQPNTLV    |
| Q96DU3 | LTCSEVEDADDNVSRWEALGNTLSSQPNTLVSWDPRISSEQ   |
| Q96DU3 | ADDNVSRWEALGNTLSSQPNTLVSWDPRISSEQDYTCIAE    |
| Q96DU3 | WDPRISSEQDYTCIAENAVSNLSFSVSAQKLCEDVKIQYTD   |
| Q7T2Q0 | CPLGWSSFDQHCYKVFEPVKNWTEAEEICMQQHKGSRLASI   |
| O94813 | LRSVPRNI PRNTERLDLNGNNI TRITKTDFAGLRHLRVLQL |
| O94813 | IEDGAFRALRDLEVLTLNNNNITRLSVASFNHMPKLRTFRL   |
| O94813 | EFTVLEATGIFKKLPLRKRINFNNKITDIEEGAFEGASGV    |
| O94813 | KGLESKTLMLRSNRITCVGNDSFIGLSSVRLLSLYDNQIT    |
| O94813 | SNYKHLTLIDLNNRISTLSNQSFNMTQLLTLILSYNRLR     |
| O94813 | LTLIDLNNRISTLSNQSFNMTQLLTLILSYNRLRCIPPR     |
| O94813 | GFEGENCEVNVDDCEDNDCENNSTCVDGINNYTCLCPPEYT   |
| O94813 | FEGENCEVNVDDCEDNDCENNSTCVDGINNYTCLCPPEYTG   |
| O94813 | VDDCEDNDCENNSTCVDGINNYTCLCPPEYTGELCEEKLD    |
| O94813 | NFINKESYLQIPSAKVRPQTNITLQIATDEDSGILLYKGDK   |
| O94813 | LALDQSLSLSDVGGNPKIITNLSKQSTLNFDSPLYVGGMPG   |

|        |                                              |
|--------|----------------------------------------------|
| O94813 | YVGGMPGKSNVASLRQAPGQNGTSFHGCI RNLYINSELQDF   |
| Q4PRD1 | CPSGWLSYEQHCYKGFNDLKNWTD AEKFCTEQKKGSHLVSL   |
| Q4PRD2 | GHLVSI ESMEAEFVAKLLSNTTGKFI THFWIGLMIKDKEQ   |
| P23126 | LVNSEENSNSIITDEDYDHYNSSL DSSNNVKHSQEA FHRNS  |
| P23126 | SQEA FHRNSDPDGFPEYEF LNETSIEI KEELGQELHQLQLI |
| Q9Y6L6 | LTALPHFFMGYYRYSKETNINSSENSTLSTCLINQILSL      |
| Q9Y6L6 | PHFFMGYYRYSKETNINSSENSTLSTCLINQILSLNRAS      |
| Q9Y6L6 | CFTAVMSLSFYLLYFFILCENKSVAGLTMTYDGNNPVTSHR    |
| Q9Y6L6 | SPCLAGCKSSSGNKKPIVFNCSCLEVTGLQNRNYS AHLGE    |
| Q9Y6L6 | KKPIVFNCSCLEVTGLQNRNYS AHLGECPRDDACTRKFYF    |
| Q9Y6L6 | TTCIKWSTNNCGTRGSCRTYNSTSF SRVYLG LSSMLRVSSL  |
| P46720 | SLPHFFMGRYEYETTISPTGNLSSNSFLCMENRTQTLKPTQ    |
| P46720 | YETTISPTGNLSSNSFLCMENRTQTLKPTQDPAECVKEMKS    |
| P46720 | FVGTGTNMVFQDCSCIQSLGNSSAVLGLCKKGP CANRLQY    |
| P83684 | AVAVLRGDSKITGTVTFEQANESAPTTVSWNITGHDPNAER    |
| P34461 | IPTELI GTIDFDQSGSFLKLN GSVSGLAAGKHGFIHEKGD   |
| P08294 | LAPRAKLDAFFALEGFPEPNSSSRAIHVHQFGDLSQGCES     |
| P21919 | PLVYLQTTLDRYDDVPDVL LNKTWMEK LISLEQGVVLLI    |
| Q8WY21 | TFALTGDSAHNQAMVHWSGHNSSVILILTKLYDYNLGSITE    |
| Q8WY21 | VHLEARTVDGSHYLTCRMQNCTEARNRQPPFGYIDPDSLI     |
| Q8WY21 | MHVI STDENQVFAAVQEW NQNDTYNLYISDTRGVYFTL ALE |
| Q8WY21 | AFWFNPSSLSKDCSLGQSYL NSTGYRKVVSN NCTDGVREQY  |
| Q8WY21 | DCSLGQSYL NSTGYRKVVSN NCTDGVREQY TAKPKC PGKA |
| Q8WY21 | APRGLRIVTADGKLTAEQGHNV TLMVQLEEGDVQRTLIQVD   |
| Q8WY21 | DVQRTLIQVDFDGI AVSYVNLSSMEDGIKHVYQNVGIFRV    |
| Q8WY21 | CPLHVLHLSLFPVTTKNKEVNATAVLWPSQVGTLYVWWYG     |
| Q8WY21 | ATAVLWPSQVGTLYVWWYGN NTEPLITLEGSISFRFTSEG    |
| Q9EPR5 | SFVLKGDATHNQAMVHWTGENSSVILILTKYYHADMGK VLE   |
| Q9EPR5 | VHVEAQDLSGGYRYTCL IYNCSAQPHIAPFSGPIDRGS LT   |
| Q9EPR5 | IDRGS LTVQDEYIFLKATSTNR TKYYVSYRRSDFVLMKLPK  |
| Q9EPR5 | SIPLKILKFSVDEGHTWSTHNF TSTS VFDGLLSEPGDETL   |
| Q9EPR5 | DVLTTKYQVDLGDGFKAMYVNL TLTGEP IRHHYESPGIYRV  |
| Q9EPR5 | SPLQALYLEVVPVIGVNQEVNLTAVLLPLNPNLTVFYWWIG    |
| Q9EPR5 | PVIGVNQEVNLTAVLLPLNPNLTVFYWWIGHSLQPLLSLDN    |
| Q92673 | RKRS AALQPEPIKVYGQVSLNDSHNQM VVHWAGEKSNVIVA  |
| Q92673 | SYDYGKSFKKISDKLNFLGNRSEAVIAQFYHSPADNKRYI     |
| Q92673 | EYYIADASEDQVFCVSHSNR TNLYISEA EGLKFSLSLEN    |
| Q92673 | PFADFHRVEGLQGVYIATLINGS MNEENMRSVITFDKGGTW   |
| Q92673 | VFTIFGSNKENVHSWLILQVNATDALGVFCTENDYKLWSPS    |
| Q92673 | RTPHATCFNGEDFDRPVVSNCSCTREDECDFGFKMSEDL      |
| Q92673 | EHNCLYWSDLALDVIQRICLNGSTGQEV IINSGLETVEALA   |



|        |                                             |
|--------|---------------------------------------------|
| Q92673 | AGFKKIEVANPDGDFRLTIVNSSVLDRPRALVLPQEGVMF    |
| Q92673 | NTGSNACVPRPCSLCLPKANNRSRSCRPEDVSSSVLPSPGD   |
| Q92673 | SSVLPSPGDLMCDPCQGYQLKNNTCVKQENTCLRNQYRCSNG  |
| Q92673 | CGDNSDESHCEMHQCRSDEYNCSSGMCIRSSWVCDGDNDCCR  |
| Q92673 | IRSSWVCDGDNDCRDWSDEANCTAIYHTCEASNFCRNGHC    |
| Q92673 | DGSDDEPVCNEKCKNGFRCPNGTCIPSSKHCDGLRDCSDGS   |
| Q92673 | MDDCGDYSDEANCENPTEAPNCSRYFQFRCENGHCI PNRWK  |
| Q92673 | CDGYRDCADGSDDEEACPLLANVTAASTPTQLGRCDRFEFEC  |
| Q92673 | YNVYRVRVVGESIWKTLETHSNKNTNVLKVLKPDTTYQVKVQ  |
| Q92673 | YIVEYSRSGSKMWASQRAASNFTIKNLLVNTLYTVRVAAV    |
| Q92673 | LLVNTLYTVRVAAVTSRIGNWSDSKSI TTIKGKVI PPPDI  |
| Q92673 | HKQERRTLNFRGSI LSHKVGNLTAHTSYEISAWAKTDLGDS  |
| Q92673 | EHVMTRGVRPPAPSLKAKAINQTAVECTWTGPRNVVYGIFY   |
| Q92673 | YATSFLDLYRNPKSLTTSLHNKTVIVSKDEQYLFVLRVVVP   |
| Q92673 | AVAVKDLIRKTDRSYKVKSRNSTVEYTLNKLEPGGKYHIIV   |
| Q92673 | EYTLNKLEPGGKYHIIVQLGNMSKDSSIKITTVSLSAPDAL   |
| Q92673 | TENDHVLLFWKSLALKEKHFNESRGEIHMFD SAMNITAYL   |
| Q92673 | KEKHFNESRGEIHMFD SAMNITAYLGNTTDNFFKISNLKM   |
| Q92673 | SRGYEIHMFDSAMNITAYLGNTTDNFFKISNLKMGHNYTFT   |
| Q92673 | AYLGNTTDNFFKISNLKMGHNYTFTVQARCLFGNQCGEPA    |
| Q99523 | SAPGEDEECGRVRFVAKLANNTHQHVFDLDRGSVLSWVG     |
| Q99523 | SKLYRSEDYGNFKDITDLINNTFIRTEFGMAIGPENS GKV   |
| Q99523 | KLYRSEDYGNFKDITDLINNTFIRTEFGMAIGPENS GKVV   |
| Q99523 | KAVCLAKWGS DNTIFFTTYANGSCKADLGALELWRTSDLGK  |
| Q99523 | YSKSLDRHLYTTTGGGETFTNVTSLRGVYITSVLSEDNSIQ   |
| Q99523 | FTRDPIYFTGLASEPGARSMNISIWGFTE SFLTSQWVSYTI  |
| Q99523 | SICLCSLEDFLCDFGYRPFENDSKCQEPELKGHDLEFCLY    |
| Q80X76 | VFGCPDVTLGRNTAVREVQENITSVDSLTLASSNTDFAFSL   |
| Q80X76 | LLSLGAKSNTLKEI LEGLKFNL TETPEPDIHQGFYLLDLL  |
| Q80X76 | FTADFQQPLEATKLINDYVSNHTQ GKIKELISDLDKRTL MV |
| Q80X76 | TPYFRDEELSCTVVELKY TGNASAMFILPDQGMQOVEASL   |
| P07759 | VLCFPDGTKEMDIVFHEHQDNGTQDDSLTLASVNTDFAFSL   |
| P07759 | LVSLGAKGKTMEEI LEGLKFNL TETPEADIHQGFNLLQSL  |
| P07759 | FTADFQQPTEAKNLINDYVSNQTQGMIKELISELDER TLMV  |
| P07759 | TRHFRDEELSCSVLELKY TGNASALLILPDQGRMQOVEASL  |
| Q03734 | LVSLGAKGNTLEEI LEGLKFNL TETSEADIHQGFHLLQRL  |
| Q03734 | FTADFQQPTEATKLINDYVSNQTQGMIKKLI SELDDRTLMV  |
| Q03734 | TRHFRDEELSCSVLELKY TGNASALFILPDQGRMQOVEASL  |
| P08723 | IRIFLTVIDLKIGIQLRFGGNWSDVYGSRS LKYKEFLLEDG  |
| P34525 | IGVKSKEYFLDDGTNLLNHKNVTFVLRYNVIPNSGYLRLVQ   |
| P28687 | KDMKSKYFFFDDGNGLKGNRNVTLSWNVV PNAGLLPLVT    |

|        |                                             |
|--------|---------------------------------------------|
| P61008 | KDMKTKYFFDDGNGLKGNRNVTLLTSWNVVFNAGILPLVT    |
| P61009 | KDMKTKYFFDDGNGLKGNRNVTLLTSWNVVFNAGILPLVT    |
| P51688 | RFRNALLLADDGGFESGAYNNSAIATPHLDALARRSLLFR    |
| P51688 | GKKHVGPETVYFFDFAYTEENGSVLQVGRNITRIKLLVRKF   |
| P51688 | VYFFDFAYTEENGSVLQVGRNITRIKLLVRKFLQTQDDRPF   |
| P51688 | GRMDQGVGLVLQELRDAGVLNDTLVIFTSDNGIPFPSGRTN   |
| P51688 | KMPFPIDQDFYVSPTFQDLLNRTTAGQPTGWYKDLRHYYR    |
| Q8CEK3 | PYSVFSVNI FAGPENVIKEPNCTMYKSKSECSNIAENPVCA  |
| Q9R097 | EGTYLQLTRTDSQPEETANLTI TVLTAKQTEDYCLASYK    |
| O43291 | FCLVSKVVGRCRASMPRWYVNTDGSQQLFVYGGCDGNSNN    |
| O43291 | NSNNYLTKEECLKKCATVTENATGLATSRNAADSSVPSAP    |
| Q01083 | QAPVTSSTMRTTTTTTTTPRPNI TFPTYKCPETFDAWYCLND |
| Q9HCB6 | KPILDCCACGTAKYRLTFYGNWSEKTHPKDYPRRANHWSAI   |
| Q9HCB6 | MLPECPIDCELTEWSQWSECNKSCGKGHVIRTRMIQMEPQF   |
| Q8TCT8 | TKDYCMLYNPYWTALPSTLENATS ISLMNLTSTPLCNLSDI  |
| Q8TCT8 | NPYWTALPSTLENATS ISLMNLTSTPLCNLSDIPPVGIKSK  |
| Q8TCT8 | STLENATSISLMNLTSTPLCNLSDIPPVGIKSKAVVVPWGS   |
| Q8TCT8 | HFLEKARIAQKGGAEAMLVNNNSVLFPPSGNRSEFPDVKIL   |
| Q8TCT8 | KGGAEAMLVNNNSVLFPPSGNRSEFPDVKILIAFISYKDFR   |
| Q8TCT8 | EFPDVKILIAFISYKDFRDMNQTLGDNITVKMYSPSWPNFD   |
| Q8TCT8 | ILIAFISYKDFRDMNQTLGDNITVKMYSPSWPNFDYTMVVI   |
| P09486 | QDPTSCPAPIGEFEKVCNSDNKTFDSSCHFFATKCTLEGTK   |
| Q14515 | TDSNQQESITKREENQEQRNYSHHQLNRSSKHSQGLRDQG    |
| Q14515 | SITKREENQEQRNYSHHQLNRSSKHSQGLRDQGNQEQDPN    |
| Q14515 | NRSSKHSQGLRDQGNQEQDPNISNGEEEEKEPGEVGTTHND   |
| Q14515 | EFDQGNQEEDNSNAEMEEENASNVNKHIEQTEWQSQEGKT    |
| Q14515 | ENENIGTTEPGEHQEAKKAENSNEEETSSEGNMRVHAVDS    |
| Q14515 | CQDPVTCPPTKPLDQVCGTDNQTYASSCHLFATKCRLEGTK   |
| P43307 | IVESLDASFRYPQDYQFYIQNF TALPLNTVVPQRQATFEY   |
| P43307 | LVINLNYKDLNGNVFQDAVFNQTVTVIEREDGLDGETIFMY   |
| Q9CY50 | IVESLDASFRYPQDYQFYIQNF TALPLNTVVPQRQATFEY   |
| Q9CY50 | SFRYPQDYQFYIQNF TALPLNTVVPQRQATFEYSFIPAEP   |
| Q9CY50 | LVINLNYKDLNGNVFQDAVFNQTVTVIEREDGLDGETIFMY   |
| P43308 | DFGIVSGMLNVKWDRIAPASNVSHTVVLRPLKAGYFNFTSA   |
| P43308 | APASNVSHTVVLRPLKAGYFNFTSATITYLAQEDGPVVIGS   |
| Q22169 | SFDIVKGLLFVHFEQIPAGSNVTHSVVIRPRAFGFFNYTAA   |
| Q22169 | PAGSNVTHSVVIRPRAFGFFNYTAAQVTTYTDNENHHVTLT   |
| Q9CPW5 | DFGIVSGMLNVKWDRIAPASNVSHTVVLRPLKAGYFNFTSA   |
| Q9CPW5 | APASNVSHTVVLRPLKAGYFNFTSATITYLAQEDGPVVIGS   |
| P56677 | QKVFNGHLRITNEIFLDAYENSTSTEFISLASQVKEALKLL   |
| P56677 | LSPMEPHAVVRLCGTFSPSYNLTFLLSQNVFLVTLITNTDR   |

|        |                                              |
|--------|----------------------------------------------|
| P56677 | SDTQGTFSPPYYPGHYPNINCTWNIKVPNNRNVKVRFKLF     |
| P56677 | YVEINGEKYCGERSQFVVSSNSKITVHFHSDHSYTDTGFL     |
| P56677 | LRCDGWADCPDYSDERYCRCNATHQFTCKNQFCKPLFWVCD    |
| P56677 | HTKEGGTGALILQKGEIRVINQTTCEDLMPQQITPRMCMVG    |
| Q9NY15 | PGGAETPCNGHGTCLDGMDRNGTCVCQENFRGSACQECQDP    |
| Q9NY15 | DGMVCLPKDPCTDNLGGCFSNSTLCVYQKPGQAFCTCRPGL    |
| Q9NY15 | YQKPGQAFCTCRPGLVLSINSNASAGCFACSPFSCDRSATC    |
| Q9NY15 | TAGPFTVLVPSVSSFSRMTNASLAQQLCRQHIIAGQHILE     |
| Q9NY15 | VEKLISKGRILTMANQVLAVNISEEGRI LLGPEGVPLQRVD   |
| Q9NY15 | HCSEEQHKIVAGSCVDCQALNTSTCPNSVKLDI FPKECVY    |
| Q9NY15 | VYIHDPTGLNVLKKGCSYCNQTIMEQGCKGFFGPDCTQC      |
| Q9NY15 | FGPDCTQCPGGFSNCPYKGNCSGDIQGNGACLCFPDYKGI     |
| Q9NY15 | GSGGVCQQGTCA PGFSGRFCNESMGDCGPTGLAQHCHLHAR   |
| Q9NY15 | ARLGGQEVATLNPTRWEIRNISGRVWVQNASVDVADLLAT     |
| Q9NY15 | TLNPTRWEIRNISGRVWVQNASVDVADLLATNGVLHILSQ     |
| Q9NY15 | HHGLVPQIEAATAYTIFVPTNRSLEAQGNSSHLDADTVRHH    |
| Q9NY15 | EAATAYTIFVPTNRSLEAQGNSSHLDADTVRHHVVLGEALS    |
| Q9NY15 | LRKGGHRNSLLGPAHWIVFYNHSGQPEVNHVPLEGPMLEAP    |
| Q9NY15 | TVGSSRCLHSHAEALREKCVNCTRFRCTQGFQLQDTPRKS     |
| Q9NY15 | CHEGFHGTACEVCELGRYGPNCTGVCDCAHGLCQEGLOGDG    |
| Q9NY15 | IFCSEVDPCAHHGGCSPHANTKVAPGQRTCTCQDGYMGD      |
| Q9NY15 | KELKGDGPF TIFVPHADLMSNLSQDELARIRAHRQLVFRYH   |
| Q9NY15 | VLLPPEALHWEPPDDAPIPRRNVAAAQGFYKIFSGLLKVA     |
| Q9NY15 | RVCTVADLCQDGHGGCSEHANCQVGTMTVTCTCLPDYEGDG    |
| Q9NY15 | FQEKRAGVFHLQATSGPYGLNFSEAEACEAQGAVLASFPQ     |
| Q9NY15 | PQLSAAQQLGFHLC LMGWLANGSTAHPVVFPVADCGNGRVG   |
| Q9NY15 | FPVADCGNGRVGIVSLGARKNLSERWDAYCFRVQDVACRCR    |
| Q9NY15 | VGDGISTCNGKLLDVLAAATANFSTFYGMMLGYANATQRGLD   |
| Q9NY15 | DVLAATANFSTFYGMMLGYANATQRGLDFLDFLDELTYKT     |
| Q9NY15 | LDELTYKT L FVPVNEGFDNMTLSGPDLELHASNATLLSA    |
| Q9NY15 | NEGFDNMTLSGPDLELHASNATLLSANASQKLLPAHSGL      |
| Q9NY15 | MTLSGPDLELHASNATLLSANASQKLLPAHSGLSLII SDA    |
| Q9NY15 | GKLLPAHSGLSLII SDAGPDNS SWAPVAPGTVVVSRII VWD |
| Q8WWQ8 | PGGAGSPCNGRGS CAEGMEGNGTCSQEGFGGTACETCADD    |
| Q8WWQ8 | GVGC SMTDICKSDNPCHRANCTTVAPGRTECICQKGYVD     |
| Q8WWQ8 | AAQYFVKLHI IAGQMNI EYMNTDMFYTLTGKSGEIFNSDK   |
| Q8WWQ8 | VATL ISTPHIRSMANQLIQFN TTDNGQILANDVAMEEIEIT  |
| Q8WWQ8 | HRCVYSGRFGSLKSGCARYCNATVKI PKCKGFYGPDCNQC    |
| Q8WWQ8 | PGGFSNPCSGNGQCADSLGGNGTICEEGFQGSQCQFCSDP     |
| Q8WWQ8 | TSACGPYVQFCHI HATCEYSNGTASCICKAGYEGDGLCSE    |
| Q8WWQ8 | GRDCSEINNCLLPSAGGCHDNASC LYVGPQNECECKKGR     |

|        |                                            |
|--------|--------------------------------------------|
| Q8WWQ8 | NAAVELSFLEAAIFNRWINNASLQPTLSATSNLTVLVPSQ   |
| Q8WWQ8 | AIFNRWINNASLQPTLSATSNLTVLVPSQQATEDMDQDEKS  |
| Q8WWQ8 | SDMLATSLQGNFHLAKVDGNITIEGASIVDGDNAATNGVI   |
| Q8WWQ8 | SYFLSFHLNDQLYVNEAPINYTNVATDKGVIHGLGKVLEI   |
| Q8WWQ8 | KGVIHGLGKVLEIQKNRCDNNDTTIIRGRCRTCSSELTCPF  |
| Q8WWQ8 | PCPGNAQNVCFNGICLDGVNGTGVECEGEGFSGTACETCT   |
| Q8WWQ8 | GPLDGDSCDCDVGWRGVHCDNATTEDNCNGTCHTSANCLTN  |
| Q8WWQ8 | DCDVGWRGVHCDNATTEDNCNGTCHTSANCLTNSDGTASCK  |
| Q8WWQ8 | NCLTNSDGTASCKCAAGFQNGGTICTAINACEISNGGCSAK  |
| Q8WWQ8 | CTLINVCLTKNGGCSEFAICNHTGQVERTCTCKPNYIGDGF  |
| Q8WWQ8 | LRYHVVACHQLLENLKLISNATSLQGEPIVIVSVSQSTVYI  |
| Q8WWQ8 | LLSPKNLLITPKDNSGRILQNLTTLATNNGYIKFSNLIQDS  |
| Q8WWQ8 | RGVCLDQYSATGECKCNTGFNGTACEMCWPGRFGPDCLPCG  |
| Q8WWQ8 | QAVLPAVCTPPCSAHATCKENNTCECNLDYEGDGITCTVVD  |
| Q8WWQ8 | FASQNCGSGVVGIVDYGPRPNKSEMWDVFCYRMKDVNCTCK  |
| Q8WWQ8 | GPRPNKSEMWDVFCYRMKDVNCTCKVGYVGDGFSCGNLLQ   |
| Q8WWQ8 | QVLMSPSLTNFLTEVLAYSNSARGRAFLEHLTDLSIRGT    |
| Q8WWQ8 | LTDLIRGTFLVFPQNSGLGENETLSGRDIEHHLANVSMFFY  |
| Q8WWQ8 | NSGLGENETLSGRDIEHHLANVSMFFYNDLVNGTTLQTRLG  |
| Q8WWQ8 | GRDIEHHLANVSMFFYNDLVNGTTLQTRLGSKLLITASQDP  |
| Q08264 | VARCLNGALAVGCGTFACLENSTCDTDGMHDICQLFFHTAA  |
| P43647 | VARCLNGALDVGCGTFACLENSTCDTDGMHDICQLFFHTAA  |
| P43648 | VARCLNGALAVGCGTFACLENSTCDTDGMHDICQLFFHTAA  |
| D6VTK4 | APSLSNLFYDPTYNPGQSTINYTSIYNGSTITFDELQGLV   |
| D6VTK4 | FYDPTYNPGQSTINYTSIYNGSTITFDELQGLVNSTVTQA   |
| Q687X5 | LHVLYTLVPIRYYVRWRLGNLTVQAILKKENPFSTSSAW    |
| P00302 | SAGWKVPPFGDVVDYDVKWASNKTFHIGDVLVFKYDRRFHNV |
| P00302 | KYDRRFHNVDKVTQKNYQSCNDTTPIASYNTGBBRINLKTV  |
| Q13586 | EDKLISVEDLWKAWKSSEVYNWTVDEVVQWLITYVELPYE   |
| Q13586 | EETFRKLQLSGHAMPRLAVTNTMTGTVLKMTDRSHRQKLQ   |
| P08842 | PNIIIVMADDLGIGDPGCGYGNKTIRTPNIDRLASGGVKLTQ |
| P08842 | PLNCFMMRNYEIIQQPMSYDNLQRLTVEAAQFIQRNTETP   |
| P46978 | PEDAKVMSWWDYGYQITAMANRTILVDNNTWNNTHISRVGQ  |
| P46978 | SWWDYGYQITAMANRTILVDNNTWNNTHISRVGQAMASTE   |
| P46978 | YGYQITAMANRTILVDNNTWNNTHISRVGQAMASTEKAYE   |
| P46977 | PEDAKVMSWWDYGYQITAMANRTILVDNNTWNNTHISRVGQ  |
| P46977 | SWWDYGYQITAMANRTILVDNNTWNNTHISRVGQAMASTE   |
| P46977 | YGYQITAMANRTILVDNNTWNNTHISRVGQAMASTEKAYE   |
| Q3TDQ1 | YGYQIAGMANRTTLVDNNTWNNSHIALVGKAMSSNETAAYK  |
| Q3TDQ1 | VDNNTWNNSHIALVGKAMSSNETAAYKIMRSLDVYVLVIF   |
| Q8TCJ2 | TVYPGLMITAGLIHWILNLTNITVHIRDVCVFLAPTFSGLT  |

|        |                                            |
|--------|--------------------------------------------|
| Q8TCJ2 | DEHARVMSWWDYGYQIAGMANRTTLVDNNTWNNSHIALVVK  |
| Q8TCJ2 | SWWDYGYQIAGMANRTTLVDNNTWNNSHIALVVKAMSSNET  |
| Q8TCJ2 | YGYQIAGMANRTTLVDNNTWNNSHIALVVKAMSSNETAAYK  |
| Q8TCJ2 | VDNNTWNNSHIALVVKAMSSNETAAYKIMRTLVDVYVLVIF  |
| P46975 | ADDARVMSWWDYGYQIAGMANRTTLVDNNTWNNSHIALVVK  |
| P46975 | SWWDYGYQIAGMANRTTLVDNNTWNNSHIALVVKAMSSNES  |
| P46975 | YGYQIAGMANRTTLVDNNTWNNSHIALVVKAMSSNESAAAYE |
| P46975 | VDNNTWNNSHIALVVKAMSSNESAAAYEIMTELDVYIILVIF |
| P14410 | PEQFPTEGICARQCWRPWNDSLIPWCFVDNHGYNVQDM     |
| P14410 | DHGQKYVILDPAISIGRRANGTTYATYERGNTOHVWINES   |
| P14410 | RANGTTYATYERGNTOHVWINESDGSTPIIGEVWPGLTVYP  |
| P14410 | DVTTASRKNPLGLIVALGENNTAKGDFFWDDGETKDTIQN   |
| P14410 | GETKDTIQNGNYILYTFVSNNTLDIVCTHSSYQEGTTLAF   |
| P14410 | TDSVTEVVAENNQPMNAHSNFTYDASNQVLLIADLKLNLG   |
| P14410 | TYDASNQVLLIADLKLNLGRNFSVQWNQIFSENERFNCYPD  |
| P14410 | HPVMPAYWALGFQLCRYGYANTSEVRELYDAMVAANIPYDV  |
| P14410 | DKIRGEGMRYIIILDPAISGNETKTYPAFERGQQNDVFVKW  |
| P14410 | FVKWPNTNDICWAKVWPDLPNITIDKTLTEDEAVNASRAHV  |
| P14410 | VWPDLPNITIDKTLTEDEAVNASRAHVAFPDFFRSTAEWW   |
| P14410 | NEKMKFDGLWIDMNEPSSFVNGTTNQCENDELNYPYFPE    |
| P14410 | MMEFSLFGMSYTGADICGFFNNSYHLCTRWMQLGAFYPYS   |
| P14410 | YPYSRNHNIANTRRQDPASWNETFAEMSRNINIRYTLTPY   |
| P14410 | RWFDYHTGKDIGVRQGFQTFNASYDTINLHVRGGHILPCQE  |
| P14410 | DGESIDTYERDLYLSVQFNLNQTTLTSTILKRGYINKSETR  |
| P14410 | VQFNLNQTTLTSTILKRGYINKSETRLGLSHVWGKGTTPVN  |
| Q9VEX0 | RSSLTGMVYVHNHNVFTNNDNCSSPQWQATHESTRSYATYLS |
| Q9VEX0 | TYLSNAGYRTGYFGKYLNKYNGSYIPPGWREWGGIMNSKY   |
| Q9VEX0 | SYIPPGWREWGGIMNSKYNYNSINLNGQKIKHGFYAKDY    |
| Q9VEX0 | GQKIKHGFYAKDYYPDLIANDSIAFLRSSKQONQRPVLL    |
| Q9VEX0 | SFPAPHPEDSAPQYSHLFFNVTHHTPSYDHAPNPKQWI     |
| Q9VEX0 | EQIAESRARLQIERRNMKLANSLEDFLEGAGESTTIVSS    |
| Q9VEX0 | VVDQLVDHTRSKRDLPASSNETIAQVIQQIQSTLEILELK   |
| Q9VEX0 | IQSTLEILELKFNEHELHASNSGNSYERGEKYTKSGGHRC   |
| Q9VEX0 | EKYTKSGGHRCFVDATTAKVNCNSVIYDDEKTWRTSRTQID  |
| Q9VEX0 | NDNRRRNDQSVLDSGAGPEFNMSYFTEISSTPRSNVVGQTE  |
| Q9VEX0 | HWRTAPLWNSPFCFCMNANNNTYSCLRTINGTHNFLYCEF   |
| Q9VEX0 | SFFFCMNANNNTYSCLRTINGTHNFLYCEFTTGLITFYNL   |
| Q9VEX0 | INGTHNFLYCEFTTGLITFYNLTI DRFETINRAAGLTPGER |
| Q8IWU6 | NIILVLTDDQDVELGSLQVMNKTRKIMEHGGATFINAFVTT  |
| Q8IWU6 | RSSMLTGKYVHNHNVYTNENCSSPSWQAMHEPRTFAVYLN   |
| Q8IWU6 | NCSSPSWQAMHEPRTFAVYLNNTGYRTAFFGKYLNEYNGSY  |

|        |                                            |
|--------|--------------------------------------------|
| Q8IWU6 | VYLNNTGYRTAFFGKYLNEYNGSYIPPGWREWLGLIKNSRF  |
| Q8IWU6 | SYIPPGWREWLGLIKNSRFYNYTVCRNGIKEKHGFDYAKDY  |
| Q8IWU6 | GIKEKHGFDYAKDYFTDLITNESINYFKMSKRMYPHRPVMM  |
| Q8IWU6 | SHAAPHGPEDSAPQFSKLYPNASQHITPSYNYAPNMDKHWI  |
| Q8IWU6 | SNAVGPPPTTVRVTHKCFILPNDSIHCERELYQSARAWKDHK |
| Q8IWU6 | HWQTAPFWNLGSGFCACTSSNNNTYWCLRTVNETHNLFCF   |
| Q8IWU6 | GSFCACTSSNNNTYWCLRTVNETHNLFCFATGFLEYFDM    |
| Q8IWU5 | NIILVLTDDQDVELGSMQVMNKTRIMEQGGAHFINAVTT    |
| Q8IWU5 | RSSILTGKYVHNHTYTNENCSSPSWQAQHESTRFAVYLN    |
| Q8IWU5 | NCSSPSWQAQHESTRFAVYLNSTGYRTAFFGKYLNEYNGSY  |
| Q8IWU5 | VYLNSTGYRTAFFGKYLNEYNGSYVPPGKKEWVGLLKNSRF  |
| Q8IWU5 | SYVPPGKKEWVGLLKNSRFYNYTLCRNGVKEKHGSDYSKDY  |
| Q8IWU5 | GVKEKHGSDYSKDYLTDLITNDSVFFRTSKKMYPHRPVLM   |
| Q8IWU5 | SHAAPHGPEDSAPQYSRFPNASQHITPSYNYAPNPKHWI    |
| Q8IWU5 | AIEVDGRVYHVGLGDAQFRNLTKRHWPAPEDQDDKGGD     |
| Q8IWU5 | LPDYSAANPIKVTHRCYILENDTVQCDDLKSLQAWKDHK    |
| Q8IWU5 | LLREQKRKKLRLKRLQNNDTCSMPGLTCFTHDNQHWQT     |
| Q8IWU5 | HWQTAPFWTLGPFCACTSANNNNTYWCMTINETHNLFCF    |
| Q8IWU5 | GPFCACTSANNNNTYWCMTINETHNLFCFATGFLEYFDL    |
| Q8NBK3 | IDAFYMDAYEVSNTFEKFNSTGYLTAEKFGDSFVFEGM     |
| Q8NBK7 | FAARGGLKGQVYPWGNWFQPNRTNLWQKFKPKGDKAEDGFH  |
| Q9UH99 | SARIRPTAVTLEHVPKALSPNSTISSAPKDAIFGFDEDLQ   |
| Q8BJS4 | SARIRPTAVTLEHVPKALSPNSTISSAPKDAIFGFDEDLQ   |
| Q17374 | KTESVIEERMEYGRMILLVCNKTKAKHRSDIPLWLKEFNQK  |
| Q17374 | PETITYYHYTYRQAVSFIDTNETDVPNLIYFIGVKRVVFN   |
| Q17374 | LILLEPRVYEDLNVLSDTNSCSSKYLADRPKCPQPSWS     |
| Q9DBX3 | GTWLAHPYKVESEKSQLVNETHWQYYGTSDRGNLNLTW     |
| Q9DBX3 | QLVNETHWQYYGTSDRGNLNLTDWTSALPTPAVTIELWGY   |
| Q9DBX3 | LETTLSDLRVQGRAQPGRMPNGTQARGTGLTAVAVQEDNSD  |
| Q6UWL2 | GRTQCVDKNECQFGATLVCGNHTSCHNTPGGFYCICLEGYR  |
| Q6UWL2 | HNTPGGFYCICLEGYRATNNKTFIPNDGTFCTDIDECEVS   |
| Q6UWL2 | SCTEIDCGTPPEVPDGYIIGNYTSLSGSQVRYACREGFFSV  |
| Q6UWL2 | HCQEINCGNPPEMRHAILVGNHSSRLGGVARYVCQEGFESP  |
| Q6UWL2 | VISIKGQRDPMESVREETVNLTTDSRTPEVCLALYPGTNY   |
| Q6UWL2 | VNLTTDSRTPEVCLALYPGTNYTVNISTAPPRRSMPAVIGF  |
| Q6UWL2 | ISSSRDPEVCLDLRPGTNYNVSRLRALSSELPVVISLTTQI  |
| Q9UGT4 | GTWLAVHPNKVSMMEKSELVNETRWQYYGTANTSGNLSLTW  |
| Q9UGT4 | KSELVNETRWQYYGTANTSGNLSLTWHVKSLEPTQITIELW  |
| Q9UGT4 | GLTAVAVQEGNSDVVEVRLANRTGGLEVLNQEVLSTFEQS   |
| P08471 | FEIGIVNSGSGACYTEPASQNLKSVSVYAQAQRDRLSAFG   |
| P08471 | AAQRDRLSAFGVLLAGAPVSNMTYLTPRWDSLNMTTISNLN  |

|        |                                             |
|--------|---------------------------------------------|
| P08471 | LLAGAPVSNMTYLTPRWDSLNMTTISNLNFSKTQANGTRIC   |
| P08471 | NMTYLTPRWDSLNMTTISNLNFSKTQANGTRICLLELFKPTT  |
| P08471 | RWDSLNMTTISNLNFSKTQANGTRICLLELFKPTTINEFCER  |
| Q8N3V7 | AADVQNQLASPSATLTTPTSNSSHNPPATDVNQNPATVVP    |
| Q16563 | CGGFKGQTEIQVNCPPAVTENKTVTATFGYPFRLNEASFQP   |
| Q16563 | PCKKKAFLCYFGSVTSMGSLNVSVIFGFLNMIWGGNAWFV    |
| O09117 | TCGGFKGKTEIQVNCPKVGVNKNQTVTATFGYPFRLNQASF   |
| O09117 | GGFKGKTEIQVNCPKVGVNKNQTVTATFGYPFRLNQASFHT   |
| O09117 | VTATFGYPFRLNQASFHTPPNVSCDVNWEKHVLIQDYSSS    |
| O09117 | CNPESGVSCYFVSVTSMGSLNVSVIFGFLNMIWGGNAWFV    |
| P21707 | ASHPEALAAPVTTVATLVPHNATEPASPGEGKEDAFSKLKQ   |
| Q9NUM4 | YIGVKSAYVSYDVQKRTIYLNI TNTLNI TNNNYSVEVENI  |
| Q9NUM4 | AYVSYDVQKRTIYLNI TNTLNI TNNNYSVEVENITAQVQF  |
| Q9NUM4 | LNITNTLNI TNNNYSVEVENI TAQVQFSKTVIGKARLNNI  |
| Q9NUM4 | ENITAQVQFSKTVIGKARLNNITI IGPLDMKQIDYTVPTVI  |
| Q9NYV8 | LLLVTSVFLFLNIALINI HINASINGYRRNKTCSSDSSNFT  |
| Q9NYV8 | FLNIALINI HINASINGYRRNKTCSSDSSNFTFRFSSLIVLT |
| Q9NYV8 | HINASINGYRRNKTCSSDSSNFTFRFSSLIVLTSTVFIFIPF  |
| Q64302 | IVASLGLAEGPKCSDAHGVWNYTFASTEQQYLLNSMWSKC    |
| Q64302 | SDAHGVWNYTFASTEQQYLLNSMWSKCYEPKHIVEWHVTL    |
| P48230 | GYSFII SAIS INKGPCKLMANSTWGYPFHDGDYLNDEALWN |
| P48230 | YLNDEALWNKCREPLNVVFWNLTLFSLILLVGGIQMVLCAI   |
| P40200 | VWEKTVNTEENVYATLGS DVNLTCQTQTVGFFVQMOWSKVT  |
| P40200 | FYCA YGRPCESLVTFTETPENGSKWTLHLRNMSCSVSGRYE  |
| P40200 | SLVTFTETPENGSKWTLHLRNMSCSVSGRYECLMLVLYPEGI  |
| P40200 | QTKIYNLLIQTHVTADWNSNHTIEIEINQLEI PCFQNSS    |
| P40200 | IQTHVTADWNSNHTIEIEINQLEI PCFQNSSSKISSEFT    |
| P40200 | NSNHTIEIEINQLEI PCFQNSSSKISSEFTYAWSVENSST   |
| P40200 | SVENSSTDSWVLLSKGIKEDNGTQETLISQNHLSNSTLLK    |
| P40200 | GIKEDNGTQETLISQNHLSNSTLLKDRVKLGTDYRLHLSP    |
| P40200 | LRSS TT VVFAKPEIPVIVENNSTDV LVERRFTCLLKNVFP |
| P40200 | RSSTTVKVFAKPEIPVIVENNSTDV LVERRFTCLLKNVFPK  |
| P40200 | TDV LVERRFTCLLKNVFPKANI TWFDGSFLHDEKEGIYIT  |
| P40200 | FLELKS VLTRVHSNKPAQSDNLTIWCMALSPVPGNKVWNIS  |
| P40200 | SDNLTIWCMALSPVPGNKVWNISSEKITFLLGSEISSTDPP   |
| P40200 | SSVTLVDVSALRPNTTPQPSNSMTTRGFNYPWTSSGTDTK    |
| P40200 | LHDNVFTSTARAFSEVPTTANGSTKTNHVHITGI VVNKPKD  |
| Q19981 | SKGWYGSQCDHCFGRIRISDNASYISDGPLDYSPSAKCTWL   |
| Q19981 | ASGKALVHFFSDLA INLNGFNVSYESNRCAYNCSNHGSCLN  |
| Q19981 | DLAINLNGFNVSYESNRCAYNCSNHGSCLNKCDCEDEGYKG   |
| Q19981 | WSIGGEFFDGSSDPNNIDVYNVTSRIWSKVEVSGDMPKPRF   |

|        |                                             |
|--------|---------------------------------------------|
| Q19981 | TNELWIFDMGSKKWAQQT HKNETI IAAPFAVAGHSAHVIRS |
| Q19981 | FGFMHHVQIYNFETEETVANTSDHVYGRFKHSAVEYTTPT    |
| Q19981 | VEYTTPTGATAILVYGGSMWNNTI TDSLQFDTS TKKWSNL  |
| Q19981 | YLHAAAYLNGLMVVVGGRSNVTAGSKSECFSNMVQSYDVA    |
| Q19981 | KSECFSNMVQSYDVACKQWSNMSTAPVDLKRFGH SVHVIGQ  |
| Q19981 | SVLADRNFSLSPSHFPSFRNATECPMPCAQRNNCS DCTDL   |
| Q19981 | SHFPSFRNATECPMPCAQRNNCS DCTDLEQCMWCPSTNRC   |
| Q19981 | HFPSFRNATECPMPCAQRNNCS DCTDLEQCMWCPSTNRCI   |
| Q19981 | TGLGLCIRGTSTGPLEPKPENSTWYF IDC PACQCNHSTCF  |
| Q19981 | CFTSVGSFPFVTIEKCQSCQNHTTGAHCERCAPGFYGDARN   |
| Q19981 | FYELAVDFIFTFKLRSDDKNHTSEIYLYSVPYKKT DVTDF   |
| Q19981 | TDVTFQISCESPKGNALVALNMTSSYVNLADK SQAMVDT    |
| Q19981 | KGFRRVYVADKGYPPGPDSTNTFFVRVYNFNTPVQIVVSF    |
| A2A690 | NAQNGHLEDDYYS PHGMLANGSRGDLLERVSQASSY PDVK  |
| Q7Z7G0 | ALGNAQKLPKGRPNLKVHINTSDS ILLKFLRPSNVKLE     |
| P10636 | KSTPTAEDVTA PLVDEGAPGQAAQPHTEI PEGTTAEEAG   |
| P10636 | PRGKPVSRVPQLKARMSKSKDGTGSDDKKAKTSTRSSAKT    |
| P10636 | SRTGSSGAKEMKLGADGKTKIATPRGAAPPQKQANATR      |
| P10636 | KGADGKTKIATPRGAAPPQKQANATRI PAKTPPAPKTPP    |
| P10636 | PRGAAPPQKQANATRI PAKTPPAPKTPPSSGEPKSGDR     |
| P10636 | TPGSRRTPSLPTPTREP KKVAVVRTPPKSPSSAKSRLQT    |
| P10636 | SLPTPTREP KKVAVVRTPPKSPSSAKSRLQTAPVMPDLK    |
| P10636 | AKSRLQTAPVMPDLKNVSKIGSTENLKHQPGGKQVQI IN    |
| P10636 | IGSTENLKHQPGGKQVQI INKKLDLSNVQSKCGSKDN IKHV |
| P10636 | GSTENLKHQPGGKQVQI INKKLDLSNVQSKCGSKDN IKHVP |
| P10636 | NIHHPGGQVEVKSEKLD FKDRVQSKI GSLDNITHVPGGG   |
| P10636 | GGQVEVKSEKLD FKDRVQSKI GSLDNITHVPGGGNKKIET  |
| P10636 | RVQSKI GSLDNITHVPGGGNKKIETHKLT FRENAKAKTDHG |
| Q9XTQ6 | VAYCGGVHAGEIVAELYHTNVTKWHTDYERQLVDFS IWF    |
| Q9XTQ6 | WFGASTPDVFLGFSDFGDTNNSDVL MYNSKKEIKDAYTN    |
| Q9XTQ6 | VNYIYYPASDVEVCKSAISNSTLRAYFSERHGM DGKRMQI   |
| P01848 | RDSKSSDKSVCLFTDFDSQTNVSQSKDSVYITDKTVLDMR    |
| P01848 | SDVYITDKTVLDMRSMDFKSNSAVAWSNKSD FACANAFNNS  |
| P01848 | KTVLDMRSMDFKSNSAVAWSNKSD FACANAFNNS IIPEDTF |
| P01848 | SCDVKLVEKSFETDTNLFQNL SVIGFRILLKVAGFNLLM    |
| P20061 | PLTNYQLSLDLVALCLFN GNSTA EVVNHFTPENKNY YFG  |
| P20061 | TCVKKSLINGQIKADEGSLKNI SIYTKSLVEKILSEKKENG  |
| P20061 | GKTFLDINKDSSCVSASGNFNISADEPITVTPPDSQSY ISV  |
| P20061 | ISADEPITVTPPDSQSYISVNYSVRINETYFTNVTVLNGSV   |
| P20061 | ITVTPPDSQSYISVNYSVRINETYFTNVTVLNGSVFLSVME   |
| P20061 | DSQSYISVNYSVRINETYFTNVTVLNGSVFLSVMEKAQKMN   |



|        |                                             |
|--------|---------------------------------------------|
| P20061 | ISVNYSVRINETYFTNVTVLNGSVFLSVMKAQKMNDTIFG    |
| P20061 | NVTVLNGSVFLSVMKAQKMNDTIFGFTMEERSWGPYITCI    |
| Q2MV57 | LSLLQVEEGVLPVPTCGGRRNETVDWNVTVSPRESTLEVTTI  |
| Q2MV57 | EEGVLVPVPTCGGRRNETVDWNVTVSPRESTLEVTVIRWKRGL |
| Q2MV57 | SASHNASCLAHLIQVEIYPNTSVTHNASENMTVIPNQVYQ    |
| Q2MV57 | HLLIQVEIYPNTSVTHNASENMTVIPNQVYQPLGPCPCDLT   |
| Q2MV57 | SVGSAPRNVNVEEHYVFRWQNNISGLDITVIRAEISAQQR    |
| Q9UIK5 | PVKLAAFPSTLSDCQPTPTGWNC SGYDDRENDLFLCDTNTCK |
| Q9UIK5 | IDCSQTNFNPLCASDGKSYDNACQIKEASCQKQEKIEVMSL   |
| Q9UIK5 | EASCQKQEKIEVMSLGRCDNTTTTTSKEDGHYARTDYAEN    |
| Q9WTS6 | LSYFIAMHLFGLNWHLQQTENDTFENGKVNSDTVPTNTVSL   |
| Q9WTS6 | TNTVSLPSGDNGKLGGFTHENNTIDSGELDIGRRAIQEVPP   |
| Q9WTS6 | PPGIFWRSQFLFIDQPQFLKFNISLQKDALIGVYGRKGLPPS  |
| Q9WTS6 | DQCSGHGTYLQESGSCCTDPNWTGPDSCNEICSVDCGSHGV   |
| Q9WTS6 | RISFLIGSDSTHVLPGESFFNKSLASVIRGQVLTADGTPLI   |
| Q9WTS6 | LASVIRGQVLTADGTPLIGVNVSVFLHYSEYGTITRQDGMF   |
| Q9WTS6 | IDGSLYVGDFNYVRRIFPSGNVTSVLELRNKDFRHSNPAH    |
| Q9WTS6 | SMNFYEVASPTDQELYIFDINGTHQYTVSLVTGDYLYNFSY   |
| Q9WTS6 | FDINGTHQYTVSLVTGDYLYNFSYSNDNDVAVTDSNGNTL    |
| Q9WTS6 | KSDETGWTTFFDYDSEGRLTNVTFPTGVVTNLHGDMDKAIT   |
| Q9WTS6 | KAITVDIESSSREEDVSI TSNLSS IDSFYTMVQDQLRNSYQ |
| Q9WTS6 | HYQTEPHVLAGTANPTVAKRNMTPGENGQNLVEWRFRKEQ    |
| Q9WTS6 | AYDTS GHPTLWLPSSKLMVNVTY SSTGQIASIQRGTTSEK  |
| Q9WTS6 | TMQTIRSIGYYRNIYNPPESNASIITDYNEEGLLQTAFLG    |
| Q9WTS6 | IQYDNMGRVTKREIKIGPFANTTKYAYEYDVGQLQTVYLN    |
| Q9WTS6 | QHLQFFYADLTYPTRITHVYNHSSSEITSLYYDLQGHLFAM   |
| Q9WTS6 | ESDLGTLRLTSGRKALENGINVTVSQSTTVVNGRTRRFADV   |
| Q3UHK6 | PPGTFWRSQVFI DHPVHLKFNVS LGKAALVGIYGRKGLPPS |
| Q3UHK6 | HACVIRGQVMTSDGTPLVGVNISFINNPLFGYTI SRQDGSF  |
| Q3UHK6 | SDGSLYVGDFNYIRRI FPSGNVTNILEMRNKDFRHSHPAH   |
| Q3UHK6 | FDTSGKHLYTQSLPTGDYLYNFYTYTGDGDITHITDNNGNMV  |
| Q3UHK6 | KSNENGWTTFFYEYDSFGRLTNVTFPTGQVSSFRSDTDSSVH  |
| Q3UHK6 | DSSVHVQVETSSKDDVTITTNLSASGAFYTLQDQVRNSYY    |
| Q3UHK6 | ALQTEPHLLAGTVNPTVGKRNVTLPIDNGLNLVEWRQRKEQ   |
| Q3UHK6 | LYDQAGRPSLWSPS SRLNGVNVTYSPGGHIAGIQRGIMSER  |
| Q3UHK6 | TLETIRSVGYRNIYQPPEGNASVIQDFTEDGHLHHTFYLG    |
| Q3UHK6 | VQYDNMGRVVKELKVGYPYANTRYSYDYDADGQLQTVSIN    |
| Q3UHK6 | HHLQFFYADLTNPTKVTHLYNHSSSEITSLYYDLQGHLFAM   |
| Q3UHK6 | EGDLAILGLSGGRRTLENGVNVTVSQINTVLSGRTRRYTDI   |
| P24821 | LATEGGVLKVI RHRKQSGVNATLPEENQPVVFNHVYNIKL   |
| P24821 | CCLQPATGRLDTRPFCSGRGNFSTEGCGCVCEPGWKGPNC    |

|        |                                            |
|--------|--------------------------------------------|
| P24821 | RGNFSTEGCGVCEPGWKGPNCSEPECPGNCHLRGRCIDGQ   |
| P24821 | GEDCSELICPNDCFDRGRINGTCYCEEFTGEDCGKPTCP    |
| P24821 | YRQTGLAPQYEYEISLHIVKNNTRGPGLKRVTTTRLDAPSQ  |
| P24821 | ETSLTLWKTLAKFDRYRLNYSLPTGQWVGVLPRNTTSY     |
| P24821 | RYRLNYSLPTGQWVGVLPRNTTSYVLRGLEPGQEYNVLLT   |
| P24821 | RHKSKPARVKASTEQAPELENLTVTEVGWDGLRLNWTAAQDQ |
| P24821 | QAPELENLTVTEVGWDGLRLNWTAAQAYEHFIIQVQEANK   |
| P24821 | QAYEHFIIQVQEANKVEAARNLTVPGSLRAVDIPGLKAATP  |
| P24821 | ETPNLGEVVVAEVGWDALKNLWTAPEGAYEYFFIQVEADT   |
| P24821 | GAYEYFFIQVEADTVEAAQNLTVPGLRSTDLPLGLKAATH   |
| P24821 | DFSTTPLSVEVLTEEVPDMGNLTVTEVSWDALRLNWTTPDG  |
| P24821 | EVPDMGNLTVTEVSWDALRLNWTTPDGTQFTTIQVQEADQ   |
| P24821 | GTQFTTIQVQEADQVEEAHNLTVPGSLRSMIPGLRAGTP    |
| P24821 | DLPQLGDLAVSEVGWDGLRLNWTAAADNAYEHFVIQVQEVNK |
| P24821 | NAYEHFVIQVQEVNKVEAAQNLTLPGLRAVDIPGLEAATP   |
| P24821 | RTPVLSAEASTAKEPEIGNLVSDITPESFNLSWMTDGI F   |
| P24821 | TAKEPEIGNLVSDITPESFNLSWMTDGI FETFTIEIIDS   |
| P24821 | FETFTIEIIDSNRLLLETVEYNISGAERTAHISGLPPSTDFI |
| P24821 | SIRTKTISATATTEALPLENLTI SDINPYGFTVSWMASEN  |
| P24821 | EPVSGSFTTALDGP SGLVTANITDSEALARWQPAIATVDSY |
| P24821 | GAFWYRNCHRVNLMGRYGDNNHSQGVNWFHWKGHEHSIQFA  |
| Q80YX1 | LTPEGGLKKIIRHKRESGLNMTLPEENQPVVFNHIYNIKL   |
| Q80YX1 | CCLQPAEGRDTRPFCSGRGNFSAEGCGVCEPGWKGPNC S   |
| Q80YX1 | RGNFSAEGCGVCEPGWKGPNCSEPCPGNCNLRGQCLDGQ    |
| Q80YX1 | GEDCSELICPNDCFDRGRINGTCYCEEFTGEDCGELTCP    |
| Q80YX1 | YRQTGLAPQYEYEISLHIVKNNTRGPGLKRVTTTRLDAPSH  |
| Q80YX1 | QDSLTFFWTTPLAKFDRYRLNYSLPTGQSMEVQLPKDATSH  |
| Q80YX1 | RHKSKPARVKASTEVPSELENLTVTEAGWDGLRLNWTADDL  |
| Q80YX1 | EVPSLENLTVTEAGWDGLRLNWTADDLAYEYFVIQVQEANN  |
| Q80YX1 | LAYEYFVIQVQEANNVETAHNFTVPGNLRAADIPGLKVATS  |
| Q80YX1 | TTPNLGEVTVAEVGWDALTLNWTAP EGAYKNFFIQVLEADT |
| Q80YX1 | GAYKNFFIQVLEADTTQTVQNLTVPGGLRSVDLPGLKAATR  |
| Q80YX1 | DLPQLGGLSVTEVSWDGLTLNWTDDLAYKHFFVQVQEANN   |
| Q80YX1 | LAYKHFFVQVQEANNVEAAQNLTVPGLRAVDIPGLKADTP   |
| Q80YX1 | RTPMLSTDVSTAREPEIGNLVSDVTPKSFNLSWTATDGI F  |
| Q80YX1 | TAREPEIGNLVSDVTPKSFNLSWTATDGI FDMFTIEIIDS  |
| Q80YX1 | FDMFTIEIIDSNRLLQTAEHNISGAERTAHISGLPPSTDFI  |
| Q80YX1 | SIRTKTISTATTEALPLENLTI SDTNPYGFTVSWTASEN   |
| Q80YX1 | DPVSGTLITALDGP SGLLIANITDSEALAMWQPAIATVDSY |
| Q80YX1 | WKAYAAGFDRREEFWLGLDNLSKITAQQYELRVDLQDHG    |
| Q80YX1 | GAFWYKNCHRVNLMGRYGDNNHSQGVNWFHWKGHEYSIQFA  |

|        |                                             |
|--------|---------------------------------------------|
| O61307 | RMKFLIDESSLQNYAKLETFNESRSRAVIRGRVVTSLGMGLV  |
| Q9UQP3 | YVEGFGDPMKEFWLGLDKLHNLTTGTPARYEVVRVDLQTANE  |
| P10646 | CFLEEDPGICRGYITRYFYNNQTKQCERFKYGGCLGNMNNF   |
| P10646 | CEDGPNGFQVDNYGTQLNAVNNSLTPQSTKVPSLFEFHGPS   |
| P02786 | KLVHANFGTKKDFEDLYTPVNGSIVIVRAGKITFAEKVANA   |
| P02786 | FFGHAHLGTGDFYTPGFPSFNHTQFPPSRSSGLPNI PVQTI  |
| P02786 | HTLPALLENLKLKRNNGAFNETLFRNQLALATWTIQGAAN    |
| Q62351 | KLVHANFGTKKDFEELSYVNGSLVIVRAGEITFAEKVANA    |
| Q62351 | LF'GHAHLGTGDFYTPGFPSFNHTQFPPSQSSGLPNI PVQTI |
| Q62351 | WGSGSHTLSALVENLKLKRNITAFNETLFRNQLALATWTI    |
| Q62351 | HTLSALVENLKLKRNITAFNETLFRNQLALATWTIQGVAN    |
| Q9UP52 | VGEQLPLEDPDVYCPYSAIGNVTGELVYAHYGRPEDLQDLR   |
| Q9UP52 | VYGHVHLGTGDFYTPGFPSFNHTQFPPVASSGLPSIPAQPI   |
| Q9UP52 | KTSPLLTSLIESVLKQVDSPNHSGQTYEQVVFTNPSWDAE    |
| Q9UP52 | MGRGDHTLGALLDHLRLRSNSSGTPGATSSSTGFQESRFR    |
| P20352 | FLGCLLLQVIAGAGIPEKAFNLTWISTDFKTI LEWQPKPTN  |
| P20352 | NLTWISTDFKTI LEWQPKPTNYTYTVQISDRSRNWKNCFS   |
| P20352 | EQDGRKLNVVVKDSLTLVLRKNGTFLTLRQVFGKDLGYIITY  |
| P20352 | GKDLGYIITYRKGSSTGKKTNI TNTNEFSIDVEEGVSYCFF  |
| O88393 | AGVPRLFLVSEGSVVQFSSGNFSLTAETEERSFPQENEHLL   |
| O88393 | TNGYSGMELTLLDPSCAKMNGTHFVLESPLNGCGRHRRS     |
| O88393 | PGDTDEGETAPLSRAGVVVFNCSLRQLRSPSGFQDQLDGNA   |
| O88393 | FNCSLRQLRSPSGFQDQLDGNATFNMEYNTDLFLVPSPGV    |
| O88393 | PIPHAEVDKRFSEVFKSVFNTSLFLHCELTLCSRNKGSQ     |
| P26342 | SACLATAGPEPSTRCELS PINASHPVQALMESFTVLSCAS   |
| P26342 | AGVPRLFLVSEGSVVQFSGNFSLTAETEERNFPQENEHLL    |
| P26342 | TNGYSGMELTLLDPSCAKMNGTHFVLESPLNGCGRHRRS     |
| P26342 | PGDGDEGETAPLSRAGVVVFNCSLRQLRNPSPGFQQLDGNA   |
| P26342 | FNCSLRQLRNPSPGFQQLDGNATFNMEYNTDLFLVPSPGV    |
| P26342 | PIPHAEVDKRFSEVFKSVFNTSLFLHCELTLCSRKKGSL     |
| P09533 | PPSQGEVPPGPLPEAVLALYNSTRDRVAGESAEPEPEPEAD   |
| P09533 | THNEIYDKFKQSTHSIYMFFNTSELREAVPEPVLLSRAELR   |
| P09533 | RLRLKLVQHVELYQKYSNNSWRYLSNRL LAPSDSPEWL     |
| P07200 | PPSQGDVPPGPLPEAVLALYNSTRDRVAGESVEPEPEPEAD   |
| P07200 | SGNQIYDKFKGTPHSLYMLFNTSELREAVPEPVLLSRAELR   |
| P07200 | RLRLKLVQHVELYQKYSNNSWRYLSNRL LAPSDSPEWL     |
| P01137 | PPSQGEVPPGPLPEAVLALYNSTRDRVAGESAEPEPEPEAD   |
| P01137 | THNEIYDKFKQSTHSIYMFFNTSELREAVPEPVLLSRAELR   |
| P01137 | RLRLKLVQHVELYQKYSNNSWRYLSNRL LAPSDSPEWL     |
| Q99041 | WCSDDSVFMASEEDRAEYVLNDTGMYMGFAKQIKEKPWTF    |
| Q99041 | VSRAICTMCAANNFGVLVGNWTDYDYSNGTAPYVWASSVPI   |

|        |                                              |
|--------|----------------------------------------------|
| Q99041 | MMCAANNFVGLVGNWTGDYSNGTAPYVWASSVPILQOHYIT    |
| Q99041 | QNQEREKNVLIAVETASIGKNI STKMVGENRRQDITLHYKF   |
| Q99041 | NSRTLHISVLQNSVELGHPINLTIVLKRKTATPQNVNISC     |
| Q99041 | GHPINLTIVLKRKTATPQNVNISCSDLQTYTGNKKTNLGV     |
| Q62313 | ATDHSGLGDSRRQPEKTD AELNETARPLSPVNPKEKSDQSS   |
| Q62313 | GTLTDSMKNEKDDLYKDS SGN TSAESSHFFAYLVTA AVLVA |
| P05543 | ATIHCASPEGKVTACHSSQPNATLYKMSSINADFAFNLYRR    |
| P05543 | MLSFGACCSTQTEIVETLGFNLDTMPVEIQHGFQHLICSL     |
| P05543 | LGFNLDTMPVEIQHGFQHLICSLNFPKKELELQIGNALFI     |
| P05543 | KFLNDVKTLYE TEVFSTDFSNISAAKQEINSHVEMQTKGKV   |
| P05543 | VQVPMHQMEQYYHLVDMELNCTVLQMDYSKNALALFVLPK     |
| P00735 | KLNECLEGNCAEGVGMNRYGNVSVTRSGIECQLWRSRYPHK    |
| P00735 | TRSGIECQLWRSRYPHKPEINSTTHPGADLRENF CRNPDGS   |
| P00735 | ISDRWVLTA AHCLLYPPWDKNFTVDDLVRIGKHSRTRYER    |
| P00734 | AACLEGNCAEGLGTNYRGHVNI TRSGIECQLWRSRYPHKPE   |
| P00734 | TRSGIECQLWRSRYPHKPEINSTTHPGADLQENFCRNPDSS    |
| P00734 | ISDRWVLTA AHCLLYPPWDKNFTENDLLVRIGKHSRTRYER   |
| P19221 | MDCLEGRCAMDLGVNYLGT VNVTHGTGICQLWRSRYPHKPE   |
| P19221 | THTGTGICQLWRSRYPHKPEINSTTHPGADLKENFCRNPDSS   |
| P19221 | ISDRWVLTA AHCLLYPPWDKNFTENDLLVRIGKHSRTRYER   |
| P19221 | CKASTRIRITDNMF CAGFKVNDTKRGDACEGDSGGPFVMKS   |
| P04216 | VTSLTACLVDQSLRLDCR HENTSSSPIQYEFSLTRETKKHV   |
| P04216 | KKHVLFGT VGVPEHTYRSRTNFTSKYNMKVLYLSAFTSKDE   |
| P04216 | EGTYTCALHHS GHSPPISSQNVTVLRDKLVKCEGISLLAQN   |
| P04216 | NVTVLRDKLVKCEGISLLAQNTSWLLLLLSLLQATDFM       |
| P01267 | AACLSFCQLQKQQILLSSYIN STATSYLPQCQDSGDYSFVQ   |
| P01267 | AACLSFCQLQKQQILLSSYIN STATSYLPQCQDSGDYSFVQ   |
| P01267 | AKRLQQNLFGGRFLVKVGFNL SGALGTRGTFNF SHFFQQL   |
| P01267 | AKRLQQNLFGGRFLVKVGFNL SGALGTRGTFNF SHFFQQL   |
| P01267 | FLVKVGFNL SGALGTRGTFNF SHFFQQLGLPGFQDGRALA   |
| P01267 | FLVKVGFNL SGALGTRGTFNF SHFFQQLGLPGFQDGRALA   |
| P01267 | SPCQLQAERAF LGTVRTLVS NFPSTLPALSSIIYPQCSASGQ |
| P01267 | FPGLARYSSFQDVPVSVLEGNQTQ PGGNVFLEPYLFWQILN   |
| P01267 | FPGLARYSSFQDVPVSVLEGNQTQ PGGNVFLEPYLFWQILN   |
| P01267 | EVKLRVLQFIREAEEIVTYSNSRFP LGESFLAAKGIRLTD    |
| P01267 | EVKLRVLQFIREAEEIVTYSNSRFP LGESFLAAKGIRLTD    |
| P01267 | SEAGTWCVD PASGEGVPPGTNSSAQCPSLCEVLQSGVPSRR   |
| P01267 | SEAGTWCVD PASGEGVPPGTNSSAQCPSLCEVLQSGVPSRR   |
| P01267 | PVCCDSSVKVECLSRERLGVNITWKLQLVDAPPASLPDLQD    |
| P01267 | SPDVLLCHVRDWRDPAEA QANASCPGVTYDQDSRQVTLRLG   |
| P01267 | SPDVLLCHVRDWRDPAEA QANASCPGVTYDQDSRQVTLRLG   |

|        |                                             |
|--------|---------------------------------------------|
| P01267 | TDLTTGLFSPVDLIQVIVDGNVSLPSQQHWLFKHLFSLQQA   |
| P01267 | TDLTTGLFSPVDLIQVIVDGNVSLPSQQHWLFKHLFSLQQA   |
| P01267 | FFECERLCMDPCCTGFGFLNVSQLKGGEVTCCLTNSLGLQ    |
| P01267 | IVDPSIRNFDVAHISTAAGVNFSAARDRCLWECSRHQDCLV   |
| P01267 | GVPYAAPPLGEKRFRAPEHLNWTGSWEATKPRARCWQPGIR   |
| P01267 | GVPYAAPPLGEKRFRAPEHLNWTGSWEATKPRARCWQPGIR   |
| P01267 | PGVSEDCLYLNVFVQNMNASVLVFFHNAAEGKSGDRP       |
| P01830 | VISLTAACLVNQNLRLDCRHENNTNLP IQHEFSLTREKKHV  |
| P01830 | TYRSRVNLFSDRFIKVLT LANFTTKDEGDYMCELRVSGQNP  |
| P01830 | KDEGDYMCELRVSGQNPTSSNKTINVIRDKLVKCGGISLLV   |
| P01831 | VTSLTAACLVNQNLRLDCRHENNTKDNSIQHEFSLTREKRKH  |
| P01831 | TYRSRVTLNQPYIKVLT LANFTTKDEGDYFCELQVSGANP   |
| P01831 | KDEGDYFCELQVSGANPMSSNKSISVYRDKLVKCGGISLLV   |
| P01266 | GSFQTVQCQNDGRSCWCVGANGSEVLGSRQPGRPVACL SFC  |
| P01266 | KSPFQCSAEGEFMPVQCKFVNTTMMIIFDLVHSYNRFPDAF   |
| P01266 | PKRLQQNLFGGKFLVNVGQFNLSGALGTRGTFNFSQFFQQL   |
| P01266 | FLNGGRQEDLAKPLSVGLDSNSSTGTPEAAKKDGTMNKPTV   |
| P01266 | TPCQLQSEQAFLRTVQALLSNSMLPTLSDTYIPQCSTDGQ    |
| P01266 | DLTPAKLLVKIMSYREAASGNFSLFIQSLYEAGQDVFPVL    |
| P01266 | EAKLRVLQFIRETEEIVSASNSRFPPLGESFLVAKGIRLRN   |
| P01266 | GTRVTGGQPACESPRCPLPFNASEVVGGTILCETISGPTGS   |
| P01266 | RGFCQIQVKTFGTLVSI PVCNNSVQVGCLTRERLGVNVTW   |
| P01266 | GFCQIQVKTFGTLVSI PVCNNSVQVGCLTRERLGVNVTWK   |
| P01266 | PVCNNSVQVGCLTRERLGVNVTWKSRLIEDIPVASLPDLHD   |
| P01266 | GFQNMLSGLYNP IVFSASGANLTAHLFCLLACDRDLCCDG   |
| P01266 | SFSVLLCNVKDWM DPSEAWANATCPGVTYDQESHQVILRLG  |
| P01266 | FFECERRCDADPCCTGFGFLNVSQLKGGEVTCCLTNSLGIQ   |
| P01266 | GVPYAAPPLAERRFQAPEFLNWTGSWDASKPRASCWQPGTR   |
| P01266 | PGVSEDCLYLNVFIPQNVAPNASVLVFFHNTMDREESEGWP   |
| P01266 | WYYSLEHSTDDYASFSRALENATRDYFIICPIIDMASAWAK   |
| Q02763 | QQASFLPATLMTV DKGDNVNI SFKKVLIKEEDAVIYKNGS  |
| Q02763 | NVNI SFKKVLIKEEDAVIYKNGSFIHSVPRHEVPDILEVHL  |
| Q02763 | TNEEMTLVKPDGTVLHPKDFNHTDHFSAIFTIHRILPPDS    |
| Q02763 | DSGVWCVSVNTVAGMVEKPFNISVKVLPKPLNAPNVIDTGH   |
| Q02763 | LPKPLNAPNVIDTGHNFVINISSEPYFGDGP IKS KLLYK   |
| Q02763 | SIGLPPRGLNLLPKSQTTLNL TWQPIFPSSEDDFYVEVER   |
| Q02763 | VEVERRSVQKSDQQNIKVPGNLTSVLLNNLHPREQYVVRAR   |
| Q02763 | LTAWTSLDILPPQPENIKISNITHSSAVISWTILDGYSISS   |
| Q02763 | TIRYKVGKNEHQHV DVKIKNATITQYQLKGLEPETAYQVD   |
| P01033 | TAF CNSDLVIRAKFVGTPEVNQT TLYQRYEIKMTKMYKGFQ |
| P01033 | IRFVYTPAMESVCGYFHRSHNRSEFLIAGKLDGGLLHITT    |

|        |                                              |
|--------|----------------------------------------------|
| Q21265 | KGLNNLRVTVQHVEVFKKPSNMTTLPDEIFTFSEAPACGLK    |
| Q9GZM7 | RADDICALPYLGAICYCDLFCNRTVSDCCPDFWDFLGVPPP    |
| Q9GZM7 | LVDPMIKAINQGNYGWQAGNHSAFWGMTLDEGIRYRLGTI     |
| Q8TB96 | PLLAGLALLGVGPVPARALHNVTAELFGAEAWGTAAAFGDL    |
| Q8TB96 | VFLADQONAPYFKPKVKVSVFKNHSA LITSVVPGDYDGDSQMD |
| Q8TB96 | TYLPKNYAKSELGAVIFWGQNQTLDPNNMTILNRTFQDEPL    |
| Q8TB96 | AKSELGAVIFWGQNQTLDPNNMTILNRTFQDEPLIMDFNGD    |
| Q8TB96 | GAVIFWGQNQTLDPNNMTILNRTFQDEPLIMDFNGDLIPDI    |
| Q8TB96 | DEPLIMDFNGDLIPDIFGITNESNQPIILGGNLSWHPALT     |
| Q8TB96 | IPDIFGITNESNQPIILGGNLSWHPALTTTSMKRIPHSHA     |
| Q8TB96 | SHAFIDLTEDFTADLFLTLNATTSTFQFEIWENLDGNFSV     |
| Q8TB96 | TTLNATTSTFQFEIWENLDGNFSVSTILEKPNMMVVGQSA     |
| Q8TB96 | TLHIGDYNMDGYPDALVILKNTSGSNQQAFLLENVPCNNAS    |
| Q8TB96 | LKNTSGSNQQAFLLENVPCNNASCEEARRMFKVYWELTDLN    |
| Q8TB96 | VNQPGPYIMYTTVDANGYLKNGSAGQLSQAHLALQLPYNV     |
| Q15399 | RSKNGLIHVPKDLQKTTILNISQNYISELWTSILSLSKL      |
| Q15399 | KHLDLSFNADFALPICKEFGNMSQLKFLGLSTTHLEKSSVL    |
| Q15399 | FLGLSTTHLEKSSVLPIDIAHLNISKVLLVLGETYGEKEDPEG  |
| Q15399 | DVFGFPQSYIYEIFSNMNIKNFTVSGTRMVHMLCPSKISPF    |
| Q15399 | SVSYDEKKGDCSWTKSLLSLNMSSNILTDITFRCLPPRIKV    |
| Q15399 | YPESYRGTLKDFHMSLSCNITLLIVTIVATMLVLAVTVT      |
| O60603 | DSFSSLGSLHLDLSYNYLSNLSSWFKPLSLTFLNLLGN       |
| O60603 | LEIDASDLQSYEPKSLKSIQNVSHLILHMKQHILLEIFVD     |
| O60603 | LRQNHLASLEKTGETLLTLKNLTNIDISKNSFHSMPETCQW    |
| O60603 | KNSFHSMPETCQWPEKMKYLNLSSTRIHSVTGCI PKTLEIL   |
| Q9QUN7 | KYLNLMGNPYQTLGVTSLFPNLTNLQTLRIGNVETFEIRR     |
| Q9QUN7 | LSQNHRLSMQKTGEILLTLKNLTSLDISRNTFHPMPDSCQW    |
| Q9QUN7 | RNTFHPMPDSCQWPEKMRFLNLSSTGIRVVKTCIPQTEVL     |
| O15455 | HEVADCASHLKLTVQPDLPNTITVLNLTHNQLRRLPAANFT    |
| O15455 | CSHLKLTQVPDDLPTNITVLNLTHNQLRRLPAANFTRYSQL    |
| O15455 | PTNITVLNLTHNQLRRLPAANFTRYSQLTSLDVGFTISKL     |
| O15455 | LNQHNLSQLSDKTFACNTLTELHLSNSIQIKNNPFV         |
| O15455 | LLSNNKIQALKSEELDI FANSLKLELSSNQIKEFSFGC      |
| O15455 | FLNNVQLGPSLTEKLCLELANTSIRNLSLSNSQLSTTSNTT    |
| O15455 | QLGPSLTEKLCLELANTSIRNLSLSNSQLSTTSNTTFLGLK    |
| O15455 | LANTSIRNLSLSNSQLSTTSNTTFLGLKWTNLTMLDLSYNN    |
| O15455 | LSNSQLSTTSNTTFLGLKWTNLTMLDLSYNNLVVGNDSFA     |
| O15455 | LKWTNLTMLDLSYNNLVVGNDSFAWLPQLEYFFLEYNNIQ     |
| O15455 | LINLKYLSLSNSFTSLRTLNETFVSLAHSPLHILNLTKNK     |
| O15455 | LRTLNETFVSLAHSPLHILNLTKNKISKIESDAFWSLGH      |
| O15455 | LRRVALKNVDSSPSPFQPLRNLITLDLSNNNIANINDDMLE    |

|        |                                            |
|--------|--------------------------------------------|
| O15455 | NLQKNLITSVEKKVFGPAFRNLTELDMRFNPFDCICESIAW  |
| O15455 | MRFNPFDCICESIAWFVNWINETHTNIPELSSHYLCNTPPH  |
| Q99MB1 | YNVADCSHLKLTHIPDDLPSNITVNLNTHNQLRRLPPTNFT  |
| Q99MB1 | CSHLKLTHIPDDLPSNITVNLNTHNQLRRLPPTNFTRYSQL  |
| Q99MB1 | PSNITVNLNTHNQLRRLPPTNFTRYSQLAILDAGFNSISKL  |
| Q99MB1 | LNLQHNELSQISDQTFVFNLTNTELDLMSNSIHKIKSNPFK  |
| Q99MB1 | LLLAKNKILALRSELEFLGNSSLRKLDLSSNPLKEFSPGC   |
| Q99MB1 | LLNNAQLNPHLTEKLCWELSNTSIQNLSLANNQLLATSEST  |
| Q99MB1 | QLNPHLTEKLCWELSNTSIQNLSLANNQLLATSESTFSGLK  |
| Q99MB1 | LANNQLLATSESTFSGLKWTNLQLDLSYNNLHDVGNNGSFS  |
| Q99MB1 | LKWTNLQLDLSYNNLHDVGNNGSFSYLSLRYLSLEYNNIQ   |
| Q99MB1 | LVSLKYLSLSKFTTSLQTLTNETFVSLAHSPLLTNLTKNH   |
| Q99MB1 | LQTLTNETFVSLAHSPLLTNLTKNHISKIANGTFSWLGQL   |
| Q99MB1 | LAHSPLLTNLTKNHISKIANGTFSWLGQLRILDGLNEIE    |
| Q99MB1 | LRRVALKNVDISPSPPRPLRNLTIDLNSNNIANINEDLLE   |
| Q99MB1 | MRFNPFDCICESISWFVNWINQHTHNISELSTHYLCNTPHH  |
| Q99MB1 | FDCTCESISWFVNWINQHTHNISELSTHYLCNTPHHYGF    |
| O00206 | MAFLSCVRPESWEPCVEVVPNITYQCMELNFYKIPDNLFFS  |
| O00206 | KELNVAHNLIQSFKLPEYFSNLTNLEHLDLSSNKIQSIYCT  |
| O00206 | NKIQSIYCTDLRVLHQMPLLNLSLDLSLNPMFIQPGAFKE   |
| O00206 | EFRNEGLEKFDKSALEGLCNLTIEEFLRAYLDYLDLDDIID  |
| O00206 | RLAYLDYLDLDDIDLFNCLTNVSSFSLVSVTIERVKDFSYN  |
| O00206 | KMAGNSFQENFLPDIFTELRLNLTFLDLSQCQLEQLSPTAFN |
| O00206 | CQLEQLSPTAFNSLSSLQVLNMSHNNFFSLDTFPYKCLNSL  |
| O00206 | HIMTSKKQELQHFPSLAFNLNLTQNDFACTCEHQSFLOWIK  |
| O00206 | VERMECATPSDKQGMVLSLNTCQMNKTIIGVSVLSVLVV    |
| O00206 | ATPSDKQGMVLSLNTCQMNKTIIGVSVLSVLVSVVAVL     |
| Q9QUK6 | ALFFSCLTPGSLNPCIEVVPNITYQCMDQKLSKVPDDIPSS  |
| Q9QUK6 | TKNIDLFSNPLKILKSYSFSNFSELQWLDLSRCEIETIEDK  |
| Q9QUK6 | KKLNVAHNFIHSCKLPAYFSNLTNLVHVDLSYNYIQTITVN  |
| Q9QUK6 | NYIQTITVNDLQFLRENQVNLSDMSLNPIDFIQDQAFQG    |
| Q9QUK6 | IQDQAFQGIKHELTLRGNFNSNIMKTCLQNLGLHVHRL     |
| Q9QUK6 | FRLTYTNDFDDIVKFHCLANVSAMSLAGVSIKYLEDVPKH   |
| Q9QUK6 | NTLKMAGNSFKDNTLSNVFANTTNLTFLDLSKQLEQISWG   |
| Q9QUK6 | KMAGNSFKDNTLSNVFANTTNLTFLDLSKQLEQISWGVFD   |
| Q9QUK6 | CQLEQISWGVFDLHRLQLNMSHNNLLFLDSSHYNQLYSL    |
| Q9QUK6 | NRIETSKGILQHFPKSLAFFNLNNSVACICEHQKFLQWVK   |
| Q9QUK6 | ETSKGILQHFPKSLAFFNLNNSVACICEHQKFLQWVKEQK   |
| Q9QUK6 | EQKQFLVNVEQMTCATPVEMNTSLVLDFNNSCYMYKTIIS   |
| Q9QUK6 | VEQMTCATPVEMNTSLVLDFNNSCYMYKTIISVSVSVIV    |
| Q9QUK6 | EQMTCATPVEMNTSLVLDFNNSCYMYKTIISVSVSVIVV    |

|        |                                            |
|--------|--------------------------------------------|
| O60602 | PVFGIPSCSFDGRIAFYRFCNLTQVPQVLNTERLLLSFNY   |
| O60602 | FDGRIAFYRFCNLTQVPQVLNTERLLLSFNYIRTVTASSF   |
| O60602 | NMVLEILDVSGNGWTVDITGNFSNAISKSQAFSLILAHHIM  |
| O60602 | NKINKIADEAFYGLDNLQVLNLSYNLLGELYSSNFYGLPKV  |
| O60602 | IPSIDIFLSGNKLVTLPKINLTANLIHLSENRENLDILY    |
| O60602 | DITHNKFICECELSTFINWLNHTNVTIAGPPADIYCVYPDS  |
| O60602 | HNKFICECELSTFINWLNHTNVTIAGPPADIYCVYPDSFSG  |
| Q9EPW9 | VGSMTPFSNELESMVDYSNRNLTHVPKDLPRTKALSLSQN   |
| Q9EPW9 | HVFLFNQDLEYLDVSHNRLQNISCCPMASLRHLDLSFNDFD  |
| Q9EPW9 | RHLDLSFNDFDVLVCKEFGNLTKLTFGLSAAKFRQLDLL    |
| Q9EPW9 | LLDLVSYHIKGGETESLQIPNTTVLHLVHFNLSFVQVNM    |
| Q9EPW9 | PNTTVLHLVHFNLSFVQVNMVNALGHLQLSNIKLNDEN     |
| Q9EPW9 | ENCQRLMTFSELTRGPTLLNVTLQHIETTWKCSVKLFQFF   |
| Q9EPW9 | CSVKLFQFFWPRPVEYLNLYNLTIIRIDREEFTYSETALK   |
| Q9EPW9 | SDFPFHVMCPSPPSFTFLNFTQNVFTDSVFGCSTLKRL     |
| Q9EPW9 | TLILQRNGLKNFFKVALMTKNMSSLETLDVSLNSLNSHAYD  |
| Q9EPW9 | SLNSHAYDRTCAWAESILVNLSSNMLTGSVFRCLPPKVKV   |
| Q9NR97 | SMLTCIFLLISGSCELCAEENFSRSPCDEKKQNDSVIAEC   |
| Q9NR97 | CELCAEENFSRSPCDEKKQNDSVIAECNRRLQEVPTVG     |
| Q9NR97 | TVGKYVTELDLSDNFITHITNESFQGLQNLTKINLNHNPNV  |
| Q9NR97 | LDLSDNFITHITNESFQGLQNLTKINLNHNPNVQHONGNPG  |
| Q9NR97 | NHNPVQHONGNPGIQSNGLNITDGAFLNKLNLRELLLEDN   |
| Q9NR97 | IPSGLPESLTELSLIQNNIYNIITKEGISRLINLKNLYLAWN |
| Q9NR97 | LFLSNTQIKYISEEDFKGLINLTLDLGNCPRCFNAPFPC    |
| Q9NR97 | FPCVPCDGGASINIDRFQNLTLQLRYLNLSSLSLRKINAA   |
| Q9NR97 | GASINIDRFQNLTLQLRYLNLSSLSLRKINAAWFKNMPHL   |
| Q9NR97 | RLEILDLSFNYIKGYPQHINISRNFSKLLSLRALHLRGYV   |
| Q9NR97 | LDLSFNYIKGYPQHINISRNFSKLLSLRALHLRGYVFQEL   |
| Q9NR97 | RGYVFQELREDDFQPLMQLPNLSTINLGINFIKQIDFKLFQ  |
| Q9NR97 | LSTINLGINFIKQIDFKLFQNFNSLEIYLSENRISPLVKD   |
| Q9NR97 | IYLSENRISPLVKDTRQSYANSSSFQRHIRKRRSTDFEFDP  |
| Q9NR97 | NSIFFIGPNQFENLPDIACLNLSANSNAQVLSGTEFSAIPH  |
| Q9NR97 | FSAIPHVKYLDLTNNRLDFDNASALTELSDLEVLDSLNSH   |
| Q9NR97 | SYNSHYFRIAGVTHHLEFIQNFNTNLKVLNLSHNNIYTLTDK |
| Q9NR97 | IAGVTHHLEFIQNFNTNLKVLNLSHNNIYTLTDKYNLESKSL |
| Q9NR97 | LDILWDDDNRYISIFKGLKNLTRLDSLNRKHIPNEAFL     |
| Q9NR97 | LNLPASLTELHINDNMLKFFNWTLQQFPRLELDDLGRNKL   |
| Q9NR97 | LSEVSSLKHLDLSSNLLKTINKSALETKTTTKLSMLELHGN  |
| Q17598 | LAIYSTTVFKSAMNIVCATINASTVKSSDPCHESWPEILTR  |
| Q17598 | GAFAFEHVQDIYTLNFFHDGNTSFIYSIIDYFLALFPITL   |
| Q9D563 | IIDTERLERSQRMRDQGPANRSQQEPLSSHSGLWRTCRVQ   |



|        |                                              |
|--------|----------------------------------------------|
| Q9D563 | WRTCRVQSSCTPLMNPFWQENVTVSDSSRQLLTMHGTFVIL    |
| Q92545 | RASFSSREADNHTAFIRIKTNASDSTEFIIILPVEVEVTAP    |
| Q9H813 | IPPLTSPGQPGDMNCTTQRINYTDPFNSQTVKSALIVQGPR    |
| Q9H813 | GQPGDMNCTTQRINYTDPFNSQTVKSALIVQGPREVKKREL    |
| Q9H330 | SSLWIWTLVVGyvLTVSFKWNASTERYLRAVSI PVWII L LF |
| Q9H330 | LTAKVHQESVHMIEVTSNLINETLANHPEWANWLP EAQV V Q |
| Q9H330 | YQYGREWITHKLHKILGDKVNNTAVIEKQVLELWDRLYHSW    |
| Q9H330 | VIEKQVLELWDRLYHSWFVKNVTHSGRHKGQKLHVSRQNSW    |
| P61228 | ILCEDVPVLYGPGQTGQQPANESFRNEGKCLKMGYRAEDV     |
| Q8BXN9 | LFRNTTILKFDGEPDQSLNITWFLKSADCYNEYNFKAD       |
| Q8BXN9 | FSGDFTHRLPLLGEKQEAKENATNVFTGDKIAMHEPLQTW     |
| Q8BXN9 | DFTHRLPLLGEKQEAKENATNVFTGDKIAMHEPLQTWQDA     |
| Q8NBN3 | LFRNTTIFLKFIDGEPCDLSLNI TWYLSADCYNEYNFKAE    |
| Q8NBN3 | KLKEKRGLSGKYQTSSKLFQNCSELFKQTTFSGDFMHRLLP    |
| Q8NBN3 | FSGDFMHRLLPLLGEKQEAKENGTNLTFIGDKTAMHEPLQTW   |
| Q8NBN3 | DFMHRLLPLLGEKQEAKENGTNLTFIGDKTAMHEPLQTWQDA   |
| Q9HD45 | YLWTYKKLEIGFNGNRIVDVNLTSEGKVKLV PNTKI QMSYS  |
| Q9HD45 | CCICFFVILPLNLVGTILGRNLSGQPNFPCRVNAVPRPIPE    |
| Q9ET30 | YLWTYKKLEIGFNGNRIVDVNLTSEGKVKLV PNTKI QMSYS  |
| Q9ET30 | CCICFFVILPLNLVGTILGRNLSGQPNFPCRVNAVPRPIPE    |
| Q11069 | FVVIPEWLADSRQTQFGDDRYNKTKAIKVMPPAVRARADELS   |
| Q11069 | LPVGFVIASKTSPKSCGPFQNSFFYSVITDVLHENLDKTL     |
| Q9BVK6 | EGRFTFTSHTPGEHQICLHSNSTKFSLFAGGMLRVHLDIQV    |
| Q7Z7H5 | EGRFTFTSHTPGDHQICLHSNSTRMALFAGGKLRVHLDIQV    |
| Q5FWI3 | DFSRLNVRVIDQDTARVLENEKFDTHEYHNESRRLQEFRLR    |
| Q5FWI3 | IDQDTARVLENEKFDTHEYHNESRRLQEFRLRAQEPGRIVAI   |
| Q5FWI3 | RYSSAIGFLMKNQSWQTPRNNVSLVKFGPQVSLNVFFGKPG    |
| Q5FWI3 | RFQSPGKAEIQRGDPSIISVNGDFTFRSAGALLIIVDACS     |
| P43298 | VTRIQIGHSLQGTLSPLDRNLSELERLELQWNNISGVPVPS    |
| P43298 | TLSPDLRNLSELERLELQWNNISGVPVPSLSGLASLQVLMLS   |
| P43298 | QSVEIDNPFKSWEIPESLRNASALQNFANSANVSGSLPG      |
| P43298 | NNPFKSWEIPESLRNASALQNFANSANVSGSLPGFLGFDE     |
| P43298 | EIPESLRNASALQNFANSANVSGSLPGFLGFDEFPGLSIL     |
| P43298 | QVQSLWLNQKLTGDI TVLQNM TGLKEVWLHSNKFSGLPLD   |
| P43298 | NSFTGPVPASLSLESKVVNLTNNHLQGPVPVFKSSVSVD      |
| P43298 | ESWKGNDPCTNWIACSNGNITV ISLEKMELTGTISPEFG     |
| P43298 | TISPEFGAIKSLQRIILGINNLTGMIPQELTTLPLNKTLDV    |
| Q6ZUK4 | QYCSIQAEGTSQNTSRKEDFNQTLTSNEQTSRADDLIETAK    |
| Q6ZUK4 | AEGTSQNTSRKEDFNQTLTSNEQTSRADDLIETAKVFNLNL    |
| Q0P6H9 | KYSAVRRDGSFHYVHSTPFGNYSFICVDATVNP GPKRPYNF   |
| Q0P6H9 | ILIIFRYRGYPPELKEPSGFINLTSFSLHVLSKINIFYYSVL   |

|        |                                                                         |
|--------|-------------------------------------------------------------------------|
| Q96JJ7 | LLYELGDTGKLVAVLAVIDEKNTSVEHTRLKSIIQEVARDYR                              |
| Q96JJ7 | NDYINTLLMDELTVPTVVVLNNTSNQQYFLDRQIKNVEDMV                               |
| Q9Y275 | EAPAVTAGLKI FEP P P A P G E G N S S Q N S R N K R A V Q G P E E T V T Q |
| Q9Y275 | DELSLVTLFRCIQNMPETLPNNSCY SAGIAKLEEGDELQLA                              |
| O43508 | QDGAQAGVDGTVSGWEARINS S S P L R Y N R Q I G E F I V T R A G             |
| O43557 | QLIQERRSHEVNPA AHL T G A N S S L T G S G G P L L W E T Q L G L A F      |
| P06804 | NGLPLISSMAQT L T L R S S S Q N S S D K P V A H V V A N H Q V E E Q L E  |
| P01374 | SLLWRANTDRAFLQDGFSLSNLLVPTSGIYFVYSQVVFS                                 |
| P43488 | EDGQLF ISSYKNEYQTMEVQNN SVIKCDGLYI I Y L K G S F F                      |
| P23510 | KKEKGFILTSQKEDEIMKVQNN SVI INCDGFYLI SLKGYFS                            |
| P23510 | I INCDGFYLI SLKGYFSQEVNISLHYQKDEEPLFQLKKVRS                             |
| P23510 | VRSVNSLMVASLTYKDKVYLVNVT DNTSLDDFHVNGGELIL                              |
| P23510 | SLMVASLTYKDKVYLVNVT DNTSLDDFHVNGGELILIHQNP                              |
| O35305 | KCLLHKVCDAGKALVAVDPGNHTAPRRCTAGYHWNSDCE                                 |
| O35305 | CLGFFSDVFSSTDKCKPWTNCTLLGKLEAHQGTTESDVVC                                |
| Q92956 | LSKCLQCQMCDPAMGLRASRNCRTENAVCGCSPGHFCIVQ                                |
| Q92956 | GGTESQDTLCQNCPPGTFSPNGTLEECQHQTCSWLVTKAG                                |
| P20333 | RPGTETS DVVCKPCAPGTF SNTSSTDICRPHQICNVVAIP                              |
| P20333 | TSSTDICRPHQICNVVAIPGNASMDAVCTSTSPTRSMAPGA                               |
| O75509 | GQVLTCDKCPAGTYVSEHCTNTSLRVCSSCPVGTFRHENG                                |
| O75509 | LPCAALTDRECTCPGPMFQSNATCAPHTVCPVGWGVRRKGT                               |
| O75509 | RPEHMETHEVPSSTYVPKGMNSTESNSSASVRPKVLSSIQE                               |
| O75509 | ETHEVPSSTYVPKGMNSTESNSSASVRPKVLSSIQEGTVPD                               |
| O75509 | SSASVRPKVLSSIQEGTVPDNTSSARGKEDVNKTLPNLQVV                               |
| O75509 | SIQEGTVPDNTSSARGKEDVNKTLPNLQVVNHQQGPHRHI                                |
| P25445 | SSKRRRCRLCDEGHGLEVEINCTRTQNTKCRCKPNFFCNST                               |
| P25445 | EINCTRTQNTKCRCKPNFFCNSTVCEHC DPCTKCEHGI I KE                            |
| Q5JTV8 | YQQQDEKLWKRSTFLEKHLNS SHPRSQPAILLLTAARDAE                               |
| Q8BYU6 | QSSFLWQRGRKFLQKHLNASNPSEPATIIFTAAREGKETLK                               |
| O14656 | GLNSDYVHLFVATLHFPHASNITLYKDQLQLWIRGNVSACA                               |
| O14656 | FPHASNITLYKDQLQLWIRGNVSACARSIFIF'DEMDKMHAG                              |
| Q68G38 | GLNSDYVHLFVATLHFPHASNITLYKDQLQMWIRGNVSACA                               |
| Q68G38 | FPHASNITLYKDQLQMWIRGNVSACARSIFIF'DEMDKMHAG                              |
| Q9ER38 | TAWLCRFQDCCSGGDCRISNNLTGLESDLRVR LHGQHLAS                               |
| Q9ER38 | AWLCRFQDCCSGGDCRISNNLTGLESDLRVR LHGQHLASK                               |
| Q95NU5 | VLSFHGYTGSGKNYVAEI IANNTFRLGLRSTFVQHIVATND                              |
| Q95NU5 | YESGYPREQLRLEAFERELMNFSYNEKGLQMSSELISNHLI                               |
| P00750 | GISYRGTWSTAESGAECTNWNSSALAQRPYSGRRPD AIRLG                              |
| P00750 | SSEFCSTPACSEGNSDCYFGNGSAYRGTHSLTESGASCLPW                               |
| P00750 | LKEAHVRLYPSRCTSQHLLNRTVTDNMLCAGDTRSGGPQA                                |
| Q13641 | QCPALCECSEAARTVKCVNRNLTEVPTDLPAYVRNLFLTGN                               |

|        |                                            |
|--------|--------------------------------------------|
| Q13641 | AVLPAGAFARRPPLAELALNLSGSRLDEVVRAGAFEHLPSL  |
| Q13641 | RNLTHLESLHLEDNALKVLHNGTLAELQGLPHIRVFLDNNP  |
| Q920L0 | TVLPAGAFARQPFLADLEALNLSGNHLKEVCAGAFEHLFGL  |
| Q920L0 | RNLTHLESLHLEDNALKVLHNSLAEWHLAHVKVFLDNNP    |
| Q8BWC0 | YYVFAMIGINLFRGVIVPPGNSLVPDNNNAVCGSFQELGY   |
| Q8BWC0 | GINLFRGVIVPPGNSLVPDNNNAVCGSFQELGYWPNNFDD   |
| P40225 | PPTTAVPSRTSLVLTNLNLPNRTSGLLETNFTASARTTGSG  |
| P40225 | TSLVLTNLNLPNRTSGLLETNFTASARTTGSGLLKWQQGFR  |
| P40225 | TGSGLLKWQQGFRAKIPGLLNQTSRSLDQIPGYLNRIHELL  |
| P40225 | QTSRSLDQIPGYLNRIHELLNCTRGLFPGPSRRTLGPDIS   |
| O14773 | VTGTVGLHLGVTSPVIRKRYNLTSQDVGSGTSNNSQACAQF  |
| O14773 | PSVIRKRYNLTSQDVGSGTSNNSQACAQFLEQYFHSDLAQ   |
| O14773 | RGRAGIEASLDVQYLSMAGANISTWVYSSPGRHEGQEPFLQ  |
| O14773 | SSPGRHEGQEPFLQWLMLLSNESALPHVHTVSYGDEDESL   |
| O14773 | EEAVTKFLSSSPHLPSSYFNASGRAYPDVAALSDGYWVVS   |
| O89023 | QVGTVSLHLGVTPSVLRQRYNLTAQDVGSGTTNNSQACAQF  |
| O89023 | PSVLRQRYNLTAQDVGSGTTNNSQACAQFLEQYFHNSDLTE  |
| O89023 | RGRAGIEASLDVEYLSMAGANISTWVYSSPGRHEAQEPFLQ  |
| O89023 | SSPGRHEAQEPFLQWLMLLSNESSLPHVHTVSYGDEDESL   |
| O89023 | EEAVAQFLKSSSHLPSSYFNASGRAYPDVAALSDGYWVVS   |
| Q18936 | ERESQLSVKTSPEWIDELFPNVSFIDSPHQVIRGFCRDVF   |
| Q18936 | VLYPPIIYFTFLRKKLKTPPNNTSGLFMYRKHKDEQGSDDL  |
| Q18936 | LYPPIIYFTFLRKKLKTPPNNTSGLFMYRKHKDEQGSGLDP  |
| O15533 | EGAVAFAAWDDDEPWGPWTGNGTFWLPRVQPFQEGTYLATI  |
| O88856 | LGYPDYANPPNYGNPDPIVINNTHRVLKGDYKTPANLKGYP  |
| O77081 | DGDESLPFHQLTSVRSDDGYNRTSFFIFIGGVPRSGTTLMR  |
| O00300 | DECLYCSVPCKELQYVKQECNRTHNRVCECKEGRYLEIEFC  |
| O00300 | QAGTPERNTVCKRCPDGFNSNETSSKAPCRKHTNCSVFGLL  |
| O00300 | CPDGFNSNETSSKAPCRKHTNCSVFGLLLTQKGNATHDNIC  |
| O00300 | APCRKHTNCSVFGLLLTQKGNATHDNICSGNSESTQKCGID  |
| O00300 | KIIQDIDLCEMSVQRHIGHANLTFEQLRSLMESLPGKKVGA  |
| P07204 | GSQVEHDCFALYPGPATFLNASQICDGLRGHLMTVRSSVA   |
| P07204 | GCGDPKRLGPLRGFQWVTGDNNTSYSRWARLDLNGAPLCGP  |
| P07204 | CGDPKRLGPLRGFQWVTGDNNTSYSRWARLDLNGAPLCGPL  |
| P07204 | CVEPVDPCFRANCEYQCQPLNQTSYLCVCAEGFAPIPHEPH  |
| P07204 | VCAEGFAPIPHEPHRCQMFNCQTACPADCDPNTQASCECPE  |
| P15306 | GCDDPVHLGPLRGFQWVTGDNHTSYSRWARPNQDTAPLCGP  |
| P15306 | CRAPPGTSEGHWAWEATGAWNCSVENGGCEYLCNRSTNEPR  |
| P15306 | WEATGAWNCSVENGGCEYLCNRSTNEPRCLCPRDMDLQADG  |
| P15306 | ICAPGFAPKPDPEPKCEMFCNETSCPADCNPSPVCECPE    |
| P82179 | ALIIITWSAVAVVMFDLVDYKNFSASSLSKIGSDPLKLVHDA |

|        |                                            |
|--------|--------------------------------------------|
| P82179 | EMKHLKEEKVSTRKESLQSHNVTKAEKPARVSRLEDVSA    |
| Q28820 | ALIIITWSAVAVVMFDLVDYKNFSASSIAKMGSDPLKLVHDA |
| Q28820 | IEKSEKEIKVPARRESHQLQNVTKAEKPARGSKGFEDEVPA  |
| Q9W2M2 | FAIDALDTLEHEFEFFVNNHNVTVKNHSLCVYRDSSSGPRP  |
| Q9W2M2 | LDTLEHEFEFFVNNHNVTVKNHSLCVYRDSSSGPRPESYRE  |
| Q9W2M2 | ESGMDFSSRWFISPTGTNDGNRSALSTTSIVPVDLNAYLYW  |
| Q9W2M2 | QKPRDYYPPTNLSPLWVKAFNISESEKISASVMAYIERNKL  |
| Q9W2M2 | APMQYILVEGLNNLNTPEAKNMSLKWATRWWKTNFAAFSKD  |
| P02789 | SCHTAVGRTAGWVI PMGLIHNRTGTCNFDEYFSEGCAPGSP |
| P02787 | GGFVYIAGKCGLVPLAENYNKSDNCEDTPEAGYFAIAVVK   |
| P02787 | TAVGRTAGWNI PMGLLYNKINHCRFDEFFSEGCAPGSKKDS |
| P02787 | KDKEACVHKILRQQHFLGNSVNTDCSGNFCLFRSETKDLLF  |
| Q921I1 | INHCKFDEFFSQGCAPGYEKNSTLCDLIGPLKCAPNNKEE   |
| P19134 | INHCRFDEFFRQGCAPGSQKNSLCELCVGPSPVAPNNREG   |
| O77698 | TVFENLPEKADRQYELLCNNTRAPVDAFKECHLAQVPSH    |
| O77698 | DGKEDLIWKLLSKAQEKFGKNKSGSQFLGSPPGQRDLLFK   |
| O77698 | SCHTAVDRTAGWNI PMGLIANQTGSCAFDEFFSQSCAPGAD |
| O77698 | GYTGAFRCLAEDVGDVAFVKNDTVWENTNGESTADWAKNLN  |
| Q9TUM0 | TVFESLPAKADRQYELLCNNTRKPVDAFQECHLARVPSH    |
| Q9TUM0 | VWCAVGSDEQLKCEWSRQSNQSVVCATASTTEDCIAVLK    |
| Q9TUM0 | RSKLCALCAGNEEGQNKCVPNSSERYGYTGAFRCLAENVG   |
| Q9TUM0 | KNTEQWAKDLKLGDFELLCNCTRKPVTEAESCHLAVAPNH   |
| P24627 | TVFENLPEKADRQYELLCNNSRAPVDAFKECHLAQVPSH    |
| P24627 | CAVGPEEQKCKQQWSQQSGQNVTCATASTDDCIVLVKGE    |
| P24627 | SCHTAVDRTAGWNI PMGLIVNQTGSCAFDEFFSQSCAPGAD |
| P24627 | GYTGAFRCLAEDVGDVAFVKNDTVWENTNGESTADWAKNLN  |
| P02788 | TGLRRTAGWNVPIGTLRPFNLNWTGPPEPIEAAVARFFSASC |
| P02788 | SCHTAVDRTAGWNI PMGLLFNQTGSCKFDEYFSQSCAPGSD |
| P02788 | MDKVERLKQVLLHQQAKFGRNGSDCPDKFCLFQSETKNLLF  |
| Q13507 | FLGLLVFNASDRFEGITTLPNITVTDYPKQIFRVKTTQFTW  |
| Q9Y210 | FLGLLVMNAADRFEGETKLLPNETSDNAKQLFRMKTSCFSW  |
| Q9Y210 | FIARFMAFWHASKAQSIIDANDTLKDLTKVTLGDNVYKYNL  |
| Q8R4D5 | QVPSDVDSTTYDFSHCTFSGNESKPLCVELDEHNLPRFPEW  |
| Q7Z2W7 | QVPSDVDGTTYDFAHCTFTGNESKPLCVELDEHNLPRFPEW  |
| O35433 | YLVFLFGFSTAVVTLIEDGKNSLPMESTPHKCRGSACKPG   |
| Q9NQA5 | LYMICFTTCCVYRPLKFRGNRTHSRDITILQKLLQEAYE    |
| Q15661 | QFYTAQIGADIALELEEFPNVSSHVHTVTLPPASETFPPG   |
| Q15661 | GNTRDSCQGDSSGGLVCKVNGTWLQAGVVSWECAQPNR     |
| P01222 | IPTEYTMHIERRECACTINTTICAGYCMTRDINGKFLFP    |
| P01224 | IPTEYMMHVERKECACTINTTICAGYCMTRDFNGKFLFP    |
| P01223 | IPTEYMMHVERKECACTINTTICAGYCMTRDVNGKFLFP    |

|        |                                              |
|--------|----------------------------------------------|
| P16473 | LKLIETHLRTIPSHAFSNLPNISRIYVSDVTLQQLESHSF     |
| P16473 | SRIYVSDVTLQQLESHSFYNLSKVTHIEIRNTRNLTYIDP     |
| P16473 | ESHSFYNSKVTHIEIRNTRNLTYIDPDALKEPLLKFLGI      |
| P16473 | EITDNPYMTSIPVNAFQGLCNETLTKLYNNGFTSVQGYAF     |
| P16473 | ETLTKLYNNGFTSVQGYAFNGTKLDAVYLNKNKYLTVIDK     |
| P16473 | HCCAFKNQKKIRGILESLMCNESSMQSLRQRKSVNALNSPL    |
| P40689 | NDNSEPDRWVKEPTKNIYRNLSGLAESHEDTTPGIFHGDF     |
| P40689 | PWEAFTGGWFPDAAKLGINTSF IQGDYSYVLRVVRFRE      |
| P40689 | PVHQPLEPDVRSRMDQLQIGNITS AVRFMEDVGTHTYVNSYT  |
| P40689 | YVNSYTTGNSLYQVFVYSRKNYSMIKERIKSKGLNGLSKLD    |
| P40689 | YNYFAPWFAAHLGQIRASANATVERWARRKLQY EYVVKY     |
| P40689 | RKLQY EYVVKYVTLKLHGNSTLLRSLDSDLGNDAILQLD     |
| O60635 | LIVVPAIKKDYGSQEDFTQVWNTTMKGLKCCGFTNYTDFEDS   |
| O60635 | EDFTQVWNTTMKGLKCCGFTNYTDFEDSPYFKENSAFPFPC    |
| O60635 | FEDSPYFKENSAFPFPCNDNVNTANETCTKQKAHDQKVE      |
| O60635 | FKENSAFPFPCNDNVNTANETCTKQKAHDQKVEGCFNQL      |
| Q9CQ88 | QFGISCSCLAINRNTQADVINASWSVLSNSTRHELEERSFDC   |
| Q9CQ88 | LAINRNTQADVINASWSVLSNSTRHELEERSFDCCGLFNLT    |
| Q9CQ88 | VLSNSTRHELEERSFDCCGLFNLTTLRLQDDTSCSAVCKTKS   |
| O14817 | VGLTNAWSIIQTDFRCCGVSNYTDWFEVYNATRVDPSCCLE    |
| O14817 | IQTDFRCCGVSNYTDWFEVYNATRVDPSCCLEFSESCGLHA    |
| P19075 | LQVATGILGAVFKSKSDRIVNETLYENTKLLSATGESEKQF    |
| O70401 | FRHEIKNSFKSNYENALKEYNSTGDIRSEAVDKIQSTLHCC    |
| Q8BJU2 | LGENTVPDRCCMENSQGCGRNSTTPLWRTGCYEKVKLWFDD    |
| P35441 | RNKGCSSTNVLLTLDNNVVGSSPAIRTNYIGHKTKDLQA      |
| P35441 | HCQNSVTICKKVSCPIMPASNATVPDGECCPRCWPSDSADD    |
| P35441 | ICGEDTDLDGWPNENLVCVANATYHCKKDNCNLPNSGQED     |
| P35441 | YWDTNPTRAQGYSGLSVKVNSTTGPGEHLRNLWHTGNTF      |
| P07996 | RNKGCSSTNVLLTLDNNVVGSSPAIRTNYIGHKTKDLQA      |
| P07996 | HCQNSVTICKKVSCPIMPASNATVPDGECCPRCWPSDSADD    |
| P07996 | ICGEDTDLDGWPNENLVCVANATYHCKKDNCNLPNSGQED     |
| P07996 | YWDTNPTRAQGYSGLSVKVNSTTGPGEHLRNLWHTGNTF      |
| P35442 | DGTRHVVSLEDVGLADSQWKNVTVQVAGETYSLHVGCDLID    |
| P35442 | RVSNDNQFLWELIGGPPKTRNMSACWQDGRFFAENETWVVD    |
| P35442 | GPPKTRNMSACWQDGRFFAENETWVVDSTCTCTCKFKFTIC    |
| P35442 | DGGWSHSPWSSCSVTCGVGNI TRIRLCNSPVPQMGKKNCK    |
| P35442 | CSSF PDGWSWCGSCPVGFLGNTHCEDLDECALVPDIFST     |
| P35442 | ICGEDSDLDGWPNLNLV CATNATYHC IKDNCNPHLPNSGQED |
| P35442 | YWEDQPTRAYGYSGLSVKVNSTTGTGEHLRNLWHTGNTF      |
| P02766 | YWKALGISPFHEHAEVFTANDSGPRRYTIAALLSPYSYST     |
| P07309 | YWKTLGISPFHEFADVFTANDSGHRRHYTIAALLSPYSYST    |

|        |                                             |
|--------|---------------------------------------------|
| P55955 | SLVVCLLLAACALECTARLQNVTVKGVAVCNKKRLANVEVQ   |
| P34500 | GFLDSDDKMASGKADSHGEFNLSGSTKEITGIEPYLVVFHD   |
| Q20332 | TKKSYQISTAQISQFQEAALNTTVHLKNLEDTVHVESKTK    |
| Q20332 | TTVHLKNLEDTVHVESKTKNATIVQQIDQILTNITDEIDI    |
| Q20332 | VESKTKNATIVQQIDQILTNITDEIDI IAKNGKLFQAKHG   |
| Q20332 | HDNLPLPVARHVALLNNI PANKSQLDRLMEVAFNSSAAIVN  |
| Q20332 | LLNNIPANKSQLDRLMEVAFNSSAAIVNSSAVGDDITKML    |
| Q20332 | NKSQLDRLMEVAFNSSAAIVNSSAVGDDITKMLKLAGAVS    |
| Q20332 | SSSSCYVFHDDVNFYGTCTNQSVMGSIYMLSTLLLVFLL     |
| Q9C0H2 | YNGGETSDGIHRATYSLRHRANRTVAGVQDRVWDTAVGLNHT  |
| Q9C0H2 | HANRTVAGVQDRVWDTAVGLNHTAEPSLQTLERQLAGRPEP   |
| Q9C0H2 | TVPWEQPATKDP LLRVQEVNLNGTEVNLQHLTALVDCRSLHL |
| P01739 | QNVQQSPESLIVPEGARTSLNCTFSDSASQYFWWYRQHSBK   |
| P01738 | YSGDPVVQGVNGFEAEFSSKSNSSFLHRKASVHWSDSAVYFC  |
| P01733 | NNVPIDDSGMPEDRFSAKMPNASFSTLKI QPSEPRDSAVYF  |
| Q19907 | AWLFRTYELQADIKRRSVFGNTTNLVRRLQLAERWIEMHKDA  |
| Q19907 | LVRRLQLAERWIEMHKDAVLRNDSALFRRAAEAVEWLLDEL   |
| Q19907 | DSALFRRAAEAVEWLLDELNLSDHIRDLSEETPWTWTGAM    |
| Q18120 | KINQLQIKRQRLMTAEEEYNRTAKVLTTFFQETLGI VADM   |
| Q96J42 | TESLSPKVNCEERNITGLENFTLKI LNMSQDLMDFLNPNP   |
| Q96J42 | KVNCEERNITGLENFTLKI LNMSQDLMDFLNPNP SDCTLVL |
| Q96J42 | ENFTLKI LNMSQDLMDFLNPNP SDCTLVLFYTPWCRFSASL |
| Q96J42 | PMARFNHTDRTLET LKIFIFNQGTGIEAKKNVVVTQADQIGP |
| Q6P6J9 | TDSLSPKVNCEERNITGLENFTLKI LNMSQDLMDFLNPNP   |
| Q6P6J9 | KVNCEERNITGLENFTLKI LNMSQDLMDFLNPNP SDCTLVL |
| Q6P6J9 | ENFTLKI LNMSQDLMDFLNPNP SDCTLVLFYTPWCRFSASL |
| Q6P6J9 | PMARFNHTDRTLET LKIFIFNQGTGIEAKKNVVVTQADQMGP |
| Q17688 | NVEELTEEGMPFLIYFRDPDNKTTDKVFGAEAVARELYDQRS  |
| P55144 | LKLMGAPVKMTVSQGGQPVKLNCSVEGMEDPDIHWMKDGTVV  |
| P55144 | SVEGMEDPDIHWMKDGTVVQNASQVSI SISEHSHWIGLLSLK |
| P55144 | IYWWRGLTKVGGPAPSPVNLNVTGVTQRTEFSCEARNIKGL   |
| P55144 | GLATSRPAIVRLQAPPAAFFNTTVTTISSYNASVAVVPGAD   |
| P55144 | RLQAPPAAFFNTTVTTISSYNASVAVVPGADGLALLHSCTV   |
| P55144 | AVVVVPVPPFTCLLRNLAPATNYSLRVRCANALGPSYGDWV   |
| P55144 | IPEDPGEGLGFPYKLSWVQENGTQDELMEGTRANLTDWDP    |
| P55144 | LSWVQENGTQDELMEGTRANLTDWDPQKDLI LRVCASNAI   |
| O62053 | SRLVLLAVSVALVSAIAVGNRSSHLLKSKESSDGHTERC     |
| O62053 | GHTERCEYTGDLTVKTDSTCNHSTYIMTKVTPPNESPSNGV   |
| O45944 | ATISGSFSSISEWKA VCECNLSKLNHAKTGNCKTTALWK    |
| O45944 | NHAKTGNCKTTALWKVTS DNTCTASEY LKITVFPANDDPLN |
| Q22957 | ILFLGSTYGASVATEK LKASNCTKTEGFQAIACVLRMADFA  |

|        |                                             |
|--------|---------------------------------------------|
| Q22957 | DAVVYVAKDFADCSEKLENKNSTCYQNWDPFPAIDDEETDE   |
| O45160 | VMVFVGSACASQIEKLEKSENCTEADKFLEMSCQLFDKST    |
| O45160 | RKRKLIKLI RNYCDGIVYVTQNFTECDKLESKNSTCYSAWD  |
| O45160 | DGIVYVTQNFTECDKLESKNSTCYSAWDPPFENFEEELDE    |
| O45160 | RKQKLNLI RTYCDSIVFISNNFTDCDAKLERKNSTCYTDWD  |
| O45160 | DSIVFISNNFTDCDAKLERKNSTCYTDWDPPFENYEEELDE   |
| O16406 | TSFLKLAI IGTVLLGVAHGANLTAAEKETYCELRSAIQTFLL |
| O16406 | EFKKTCDLSLKNCFAITRCGPNSTMDEAELFRMVEKNCEAVV  |
| O01454 | TVLLGVANGASVATASAKGSNCTVQDGYAALMCLVRLSDFA   |
| O01454 | TKLKEFKRSCDSLHSCYSNLNCTTKSDDEKDKYVESIKQYC   |
| P22309 | PFQREDVKESFVSLGHNVFENDSFLQRVIKTYKKIKKDSAM   |
| P22309 | VGGINCLHQNPLSQEFEAYINASGEHGIVVFSLGSVMSEIP   |
| P22309 | GKIPQTVLWRYTGTRPSNLANNIILVKWLPQNDLLGHPMTR   |
| P35503 | LYFETEHLKFKFRSMAMLNMSLVYHRSCVELLHNEALIR     |
| P35503 | LVYHRSCVELLHNEALIRHLNATSFDVVLTDPVNLCAAVLA   |
| P35503 | IGGINCANRKLPLSQEFEAYINASGEHGIVVFSLGSVMSEIP  |
| P35503 | GKIPQTVLWRYTGTRPSNLANNIILVKWLPQNDLLGHPMTR   |
| P22310 | GFFETEHLKRYSRSMAMNNSLALHRCCVELLHNEALIR      |
| P22310 | LALHRCCVELLHNEALIRHLNATSFDVVLTDPVNLCAAVLA   |
| P22310 | IGGINCANGKPLSQEFEAYINASGEHGIVVFSLGSVMSEIP   |
| P22310 | GKIPQTVLWRYTGTRPSNLANNIILVKWLPQNDLLGHPMTR   |
| Q9HAW9 | RGHEVVVMPEVSWQLGKSLNCTVKTYSTSYTLEDLDREFM    |
| Q9HAW9 | IGGINCHQKPLPMEFEAYINASGEHGIVVFSLGSVMSEIP    |
| Q9HAW9 | GKIPQTVLWRYTGTRPSNLANNIILVKWLPQNDLLGHPMTR   |
| O60656 | RGHEVVVMPEVSWQLGRSLNCTVKTYSTSYTLEDLDREFK    |
| O60656 | IGGINCHQKPLPMEFEAYINASGEHGIVVFSLGSVMSEIP    |
| O60656 | GKIPQTVLWRYTGTRPSNLANNIILVKWLPQNDLLGHPMTR   |
| P06133 | FVQSSGENGVVFSLGSMSVNTSEERANVIASALAKIPQKV    |
| P16662 | IQRGHEVTVLASSASILFDPNNSALKIEIYPTSLTKTELE    |
| P16662 | QRGHEVTVLASSASILFDPNNSALKIEIYPTSLTKTELEN    |
| P16662 | FVQSSGENGVVFSLGSMSVNMTERANVIASALAIQIPQKV    |
| P36537 | VQRGHEVTVLASSASILFDPNDSSTLKLEVYPTSLTKTEFE   |
| P36537 | FVQSSGENGVVFSLGSMSVNMTEERANVIATALAKIPQKV    |
| P36537 | FWIEFVMRHKGAKHLRVAAHNLTWFQYHSLDVIGFLACVA    |
| P54855 | ELVQRGHEVTVLTSSASTLVNASKSSAIKLEVYPTSLTKNY   |
| P54855 | FVQSSGENGIVVFSLGSMSISNMSEESANMIASALAIQIPQKV |
| P54855 | FWIEFVMRHKGAKHLRVAAHNLTWQYHSLDVIAFLACVA     |
| Q9XU84 | CMPEGYQLTEWEYALKFWNINGSSSHSFESCYGTTKNFVES   |
| Q9XU84 | TANEFQLTEGAIKTALSSEPNSTVVDQIFDLVYSGTNQVLS   |
| Q18081 | IADELANAGHEVVNFEPDFLNLTDKFPCKKRRWPVTGLN     |
| Q18081 | FVKIMEKGGVILFSLGTIANNTNLPPTIMENLMKITQKFK    |

|        |                                             |
|--------|---------------------------------------------|
| Q21706 | SKSHLISNGRIADELAKAGHNVTLLEIDFLGIVDSTKSAKL   |
| Q21706 | EAEMKKGDKGVIYFSLGT IANTSTIDKKVMESFLEIVKKFP  |
| Q10941 | ASEMSKKGEGVIYFSLGT IANTTKIDSKVMRTVLDIVKKFP  |
| Q22295 | YSKLLDNYDGAKHAKVWRLHNVTEAYDTKLGTLANVMENSH   |
| Q22295 | LNLFRKEVSSDFPSIAEI IRNVSLVLVNTDEIFDLPRSYS   |
| Q22295 | PRSYSSKFVYVGMLEAGKDENVTLPKKQDDYFKKGKSGSVF   |
| Q22295 | KWIDFVLKYETSEHFDLESNNLSI IEHNHLDLFFYLICI SL |
| Q6RJQ3 | AVKGHRLMNGLQYRLPYATWNFSQLHLGQIFSLTFNVSTDT   |
| Q6RJQ3 | PYATWNFSQLHLGQIFSLTFNVSTDTAGMYEVCVLRNYSHGL  |
| Q6RJQ3 | FSLTFNVSTDTAGMYEVCVLRNYSHGLIMQRFVILTQLETLS  |
| P42849 | NCKKENPISHMTTPPVKIMLNTTGPQYY ICTVGDHCRVQK   |
| Q09274 | TGDRKGCSCFAAFKKGKIEIDTNNTAGFMNLHTRSCLCQLDTV |
| Q09274 | DRDFTLHYDNTFGNCYTFNYNRTAEVASHRAGANYGLRVLL   |
| Q09274 | AEVASHRAGANYGLRVLLYANVSEYLPTEAVGFRI TVHDK   |
| Q09274 | VIVEACGCADPMYPVEMFGNNTKPCQAVNMDQRECLRNTT    |
| Q09274 | FGNNTKPCQAVNMDQRECLRNTTLWLGEVLYSKGKEAII PDC |
| P34374 | KVRSQFAYKAKISLEARSVRNDSTVNDPQSKSFIRFMSAQ    |
| P34374 | QGNDGTTIYESNHLGKRLKVNETKSFNLTQANFYTLPTSS    |
| P34374 | TIYESNHLGKRLKVNETKSFNLTQANFYTLPTSSVSSAVH    |
| P34374 | HNDYFNIMTFSKNTFLLDGCNGTNGLLQATMRNKALRRKM    |
| P34374 | YRERLYLPRPEIFAEPVPI TNQSFAMNMKASRRKIRLQKS   |
| P34374 | QKSEARSRMFVTTVSYPIVNETFMGVAAVNI PLTEVAQKS   |
| P34374 | MDWMGDKRWRLPHWRYCFLNDTDTHMSKEEAFE IYAQQMS   |
| P34374 | KNNLIHLAFFATPSGMIRYYNLTLDQDYDIDPYWSIFEHIG   |
| P34374 | DDRYYRRAVRMKDTIMFDVSNNSKIWYKSETQLTGYGLNEN   |
| P34374 | NNSKIWYKSETQLTGYGLNENLMLGQAFKAIYLDKAVLGV    |
| P34374 | FYFSNKDGKNRPGTTHLVNGNRSERPCKMNAKCSVKMEASF   |
| Q06561 | LNIRDPAPPQRGAAPQIDPPNQTVNVNDPAQFRCWVPGQPR   |
| Q06561 | VYTVGQPAYLSCIGKTETKPNQSVVWTKEEGLPSSGRVEQ    |
| Q06561 | QSFQGCVYBILINSQDVDLQNLSSSGDISSCEESQFPVEED   |
| Q06561 | SEEIVVGDVYSTQEPNNICANSTCGMNGQCVPRNMTHYTCE   |
| Q06561 | EPNNICANSTCGMNGQCVPRNMTHYTCECKLYYDGPCTCSLF  |
| Q22271 | TRTELLARSKKLVRLTNLMSNFTAESWKMLNNAQHGVSNMD   |
| Q26261 | VIRASDGLIMSAAARLSDSGNYTCEATNVANSRKTDPVEVQ   |
| P35456 | LLATTCVPASQGLQCMQCESNQSLVEECALGQDLCRTTVL    |
| P35456 | WQDDRELEVVTRGCAHSEKTNRTMSYRMGSMI ISLTETVCA  |
| P35456 | DYTRGCGSLPGCPGTAGFHSNQTFHFLKCCNYTHCNGGFVL   |
| P35456 | GCPGTAGFHSNQTFHFLKCCNYTHCNGGFVLDLQSFPPNGF   |
| P35456 | PVLDLQSFPPNGFQCYSCBGNNTLGCSSBEEASLINCRCGPMN |
| P35456 | INCRGPMNQCLVATGLDVLGNRSYTVRGCATASWCQGSVA    |
| P35456 | CATASWCQGSVADSFPTHNLVSVSCCHGSGCNSPTGGAPR    |



|        |                                             |
|--------|---------------------------------------------|
| Q03405 | WEEGEELELVEKSCETHSEKTNRTLSTYRTGLKITSLETVVCG |
| Q03405 | RHLRGCGYLPGCPGNGFHNNDTFHFLKCCNTTKCNEGPIIL   |
| Q03405 | GCPGNGFHNNDTFHFLKCCNTTKCNEGPIILELENLPQNGR   |
| Q03405 | PILELENLPQNGRQCYSCKGNSTHGSSEETFLIDCRGPMN    |
| Q03405 | IDCRGPMNQCLVATGTHEPKNQSYMVRGCATASMCQHAHLG   |
| P80607 | STPFFNTLYDFYREGADFVRGYPFSLREGAHTAVSHGLWL    |
| P00749 | SMYNDPQFGTSCIEITGFGKENSTDYLYPEQLKMTVVKLISH  |
| P07911 | FITTAATDTSEARWCSECHSNATCTEDEAVTTCTCQEGFTG   |
| P07911 | FTGDGLTCVDLDECAIPGAHNCSANSSCVNTPGSFSCVCPE   |
| P07911 | GLTCVDLDECAIPGAHNCSANSSCVNTPGSFSCVCEGFRLL   |
| P07911 | RMAETCVPVLRCNTAAPMWLNGTHPSSDEGIVSRKACAHWS   |
| P07911 | CCLWDASVQVKACAGGYVYNLTAPPECHLAYCTDPSSVEG    |
| P07911 | IDEDCKSNNGRWHCQCKQDFNITDISLLEHRLECGANDMKV   |
| P07911 | DWVSVVTPARDGPCGTVLTRNETHATYSNTLYLADEIIIRD   |
| P98119 | GVTYRGTWSTAESRVECINWNSSLLTRRTYNGRMPDAFNLG   |
| P98119 | LKEGHVRLYPSSRCAPKFLFNKTVTNNMLCAGDTRSGEIYP   |
| P10379 | VLIQILAPAKAAEHSVFTHKNASSVLGQLVTSSTLVWESYD   |
| P10379 | PFRYELRDIKLDRLRTDIQENMTELVTRKLENLEDKYSTVE   |
| P10379 | TEKRSENKAVHTKLWPGTAINVTLRGNVTTLEAPYSGKLFA   |
| P10379 | VRKSYLKEVKLEFSPVYWIENGLVPTTTTTTTTSTSTTH     |
| P10379 | EKTLHDSPPSSNELNSHEAPENMSSDPGKDVALAGFGVNAAG  |
| O61460 | RFSEIDIDNWKNIQRLARNSNMTTETLGMEDSDTKTIRIA    |
| O61460 | QLVYFRPQVTGPKETDMVRMNGSCIPNASKKIPGVDLIGLC   |
| O61460 | PQVTGPKETDMVRMNGSCIPNASKKIPGVDLIGLCMSTGSG   |
| O61460 | FEVEVRPAIVKKRTFETRHVNMTYTTFTIGLNPETVYQFRVR  |
| O61460 | LGRGLMSSPSSNEVEESQFLNQTGSALLIIITALLIIVIAVA  |
| Q9R1Q9 | EKLGASPLHVDLATALKELKLNASLPALLIIRLPYTASSGLM  |
| Q9R1Q9 | GRQLLQTVASPAIHPPVSYNDTAPRILFWAQNFVAYKDE     |
| Q9R1Q9 | AIHPPVSYNDTAPRILFWAQNFVAYKDEWKDLTSLTFGVE    |
| Q9R1Q9 | VAYKDEWKDLTSLTFGVENLNLGTFWNSFAMLSLTYEPL     |
| Q9R1Q9 | KDLTSLTFGVENLNLGTFWNSFAMLSLTYEPLFGATVTF     |
| Q9R1Q9 | RFYPVSARYWFAMERLEIHSNGSVAHFNVSQVTGPSIYSFH   |
| Q9R1Q9 | RYWFAMERLEIHSNGSVAHFNVSQVTGPSIYSFHCEYVSSV   |
| Q9R1Q9 | VTNVPSVWQMTLHNFQIQAFNVTGEQFSYASDCAGFFSPGI   |
| Q15904 | EKLGASPLHVDLATALRELKLNASLPALLIIRLPYTASSGLM  |
| Q15904 | GRQLLQKQVPSPVIHPPVSYNDTAPRILFWAQNFVAYKDQ    |
| Q15904 | VIHPPVSYNDTAPRILFWAQNFVAYKDQWEDLTPFTFGVQ    |
| Q15904 | VAYKDQWEDLTPFTFGVQELNLTGTFWNSFARLSLTYERL    |
| Q15904 | EDLTPFTFGVQELNLTGTFWNSFARLSLTYERLFGTTVTF    |
| Q15904 | RLYPVSARHWFMTMERLEVHNSGVAIFNASQVTGPSIYSFH   |
| Q15904 | RHWFMTMERLEVHNSGVAIFNASQVTGPSIYSFHCEYVSSL   |

|        |                                               |
|--------|-----------------------------------------------|
| Q6EMK4 | LDLSQNQIASLPSGVFQPLANLSNLDLTANRLHEITNETFR     |
| Q6EMK4 | QPLANLSNLDLTANRLHEITNETFRGLRRLERLYLGKNRIR     |
| Q6EMK4 | AQLRPEDLAGLAALQELDVSNLSLQALPGDLSGLFPRLRLL     |
| Q6EMK4 | LQRYLQGS SVQLRSLRLTYRNLSGPDKRLVTLRRLPASLAEY   |
| Q6EMK4 | LVTLRRLPASLAEYTVTQLRPNATYSVCVMPLGPGRVPEGEE    |
| P19320 | APEIFWSKKLDNGNLQHLSGNATLTLIAMRMEDSGIYVCEG     |
| P19320 | FSWRTQIDSPLSGKVRSEGTNSTLTLSPVSEFENEHSYLCTV    |
| P19320 | QVELYSFPRDPEIEMSGGLVNGSSVTVSCKVPSVYPLDRLE     |
| P19320 | GETILENIEFLEDTDMKSLNKSLLEMTFIPTIEDTGKALVC     |
| P19320 | PRDTTVLVSPSSILEEGSSVNMTCLSQGFPAFKILWSRQLP     |
| P19320 | APKILWSRQLPNGELQPLSENATLTLISTKMEDSGVYLCEG     |
| P29533 | DSTLKERETVKELQVYISPRNTTISVHPSTRLQEGGAVTMT     |
| P29533 | MTCSSSEGLPAPEIFWGRKLDNEVLQLLSGNATLTLIAMRME    |
| P29533 | APEIFWGRKLDNEVLQLLSGNATLTLIAMRMEDSGVYVCEG     |
| P29533 | PEDPVIKMSGPLVHGRPVTVNCTVPNVYFFDHLEIELLKE      |
| P29533 | PKETTIWVSPSPILEEGSPVNLTCSSDGIAPFKILWSRQLN     |
| P29533 | LTCSSDGIAPFKILWSRQLNNGELQPLSENTTLTFMSTKRD     |
| P29533 | APKILWSRQLNNGELQPLSENTTLTFMSTKRDDSGIYVCEG     |
| P02854 | RAKLSPGDVVFI PAGHPVA INASSDLNLIGLGINAENNERN   |
| Q91132 | DKGIYTPGSPVLYRVFSDHNTSKMNKTIVIEFQTPEGILV      |
| Q91132 | TPGSPVLYRVFSDHNTSKMNKTIVIEFQTPEGILVSSNSV      |
| Q91132 | PDLVSLGTWRIVAKYEHS PENYTA YFDVRKYVLP SFEVRLQ  |
| Q91132 | LTFYNAQLQEKANVCNKFHLNVSVENIHLNAMGAKGALMLK     |
| P16612 | MRCAGCCNDEALECVPTSESNVTM QIMRIKPHQSQHIGEMS    |
| P49767 | PCVSVYRCGGCCNSEGLQCMNTSTSYLSKTLFEITVPLSQG     |
| P49767 | LFEITVPLSQGPKPVTISFANHTSCRCMSKLDVYRQVHSII     |
| P49767 | QVHSIIRRSPLATLPQQAANKTCPTNYMWNHICRCLAQE       |
| O43915 | PCVNVFRCGGCCNEESL ICMNTSTSYISKQLFEISVPLTSV    |
| O43915 | LFEISVPLTSVPELVPVKVANHTGCKCLPTAPRHPYSIIRR     |
| O43915 | DRCECVCKTPCPKDLIQHPKNCSCFECKESLETCCQKHKLF     |
| P15692 | MRCGGCCNDEGLECVPTSESNITM QIMRIKPHQSQHIGEMS    |
| P35968 | SVSLDLPRLSIQKDILTIKANTLQITCRGQRDLDWLWFNN      |
| P35968 | NTTLQITCRGQRDLDWLWFNNQSGSEQRVEVTECSDGLFCK     |
| P35968 | VTECSDGLFCKTLTIPKVI GNDTGAYKCFYRETDLASVIYV    |
| P35968 | SFFIASVSDQHGVVYITENKNKT VVI PCLGSI SNLNVSLCA  |
| P35968 | ITENKNKT VVI PCLGSI SNLNVSLCARYPEKRFV PDGNRIS |
| P35968 | DVVLSPSHGIELSVGEKLVLNCTARTELNVGIDFNWEYPSS     |
| P35968 | TRSDQGLYTCAASSGLMTKKNSTFVRVHEKPFVAFGSGMES     |
| P35968 | YLGYPPEIKWYKNGIPLSNHTIKAGHVLTIMEVSEKDTG       |
| P35968 | HTIKAGHVLTIMEVSEKDTGN YTVILTNPISKEKQSHVVS L   |
| P35968 | FQGGNKIEVNKNQFALIEGKNKT VSTLVIQAANVSALYKCE    |

|        |                                             |
|--------|---------------------------------------------|
| P35968 | QFALIEGKNKTVSTLVIQAANVSALYKCEAVNKVGRGERVI   |
| P35968 | QPTEQESVSLWCTADRSTFENLTWYKLGFPPLPIHVGEPLT   |
| P35968 | IHVGEPLTPVCKNLDTLWKLNATMFSNSTNDILIMELKNAS   |
| P35968 | PTPVCKNLDTLWKLNATMFSNSTNDILIMELKNASLQDQGD   |
| P35968 | KLNATMFSNSTNDILIMELKNASLQDQGDYVCLAQDRKTKK   |
| P35968 | VVRQLTVLERVAPTITGNLENQTTSIGESIEVSCASGNPP    |
| P35968 | IEVSCASGNPPQIMWFKDNETLVEDSGIVLKDGNRNLT I    |
| P35968 | FKDNETLVEDSGIVLKDGNRNLTIRRVKEDGLYTCQACS     |
| P35916 | LCLGLLDGLVSGYSMTPTTLNITEESHVIDTGDSLSISCRG   |
| P35916 | CEGTDARPYCKVLLLHEVHANDTGSYVCYYKYIKARIEGTT   |
| P35916 | LLVNRKDAMWVPCLVSIPLNVTLSQS SVLWPDGQEVVWD    |
| P35916 | DIQLLPRKSLELLVGEKLVNCTVWAEFNSGVTFDWDYPGK    |
| P35916 | VPERRSQQTHTESSILT IHNVSQHDLSYVCKANNGIQRF    |
| P35916 | EASTGTYTLALWNSAAGLRNI SLELVVNVPPQIHEKEASS   |
| P35916 | QDAVNPIESLDTWTEFVEGKNKTVSKLVIQANVSAMYKCV    |
| P35916 | WTEFVEGKNKTVSKLVIQANVSAMYKCVVSNKVGQDERLI    |
| P35916 | VLLSCQADSYKYEHLRWYRLNLSTLHDAHGNPLLLDCKNVH   |
| P35916 | KHCHKKYL SVQALEAPRLTQNLTDLLVNVSDSLEMQCLVAG  |
| P35916 | LSVQALEAPRLTQNLTDLLVNVSDSLEMQCLVAGAHAPSIV   |
| P35916 | VREEDAGRYLCSVCNAKGCVNSASVAVEGSEDKGSMEIVI    |
| P35917 | LCLGLLQGLANGYSMTPTTLNITEDSYVIDTGDSLSISCRG   |
| P35917 | CEGTEARPYCKVLLLAQTHANNNGSYHCYYKYIKARIEGTT   |
| P35917 | LLVNRKDSMWVPCLVSIPLNITLSQS SALHPDGQEVLWD    |
| P35917 | DIQLYPKSMELLVGEKLVNCTVWAEFDSGVTFDWDYPGK     |
| P35917 | VPERRSQQTHTESSILT IHNVSQNDLGPVCEANNGIQRF    |
| P35917 | EASAGVYTLALWNSAAGLRQNI SLELVVNVPPHIHEKEASS  |
| P35917 | QDAVNPIESLDSWTEFVEGKNKTVSKLVIQDANVSAMYKCV   |
| P35917 | WTEFVEGKNKTVSKLVIQDANVSAMYKCVVSNKVGQDERLI   |
| P35917 | SEPSEDPLEGQSVRLSCRADNYTYEHLRWYRLNLSTLHDAQ   |
| P35917 | VRLSCRADNYTYEHLRWYRLNLSTLHDAQGNPLLLDCKNVH   |
| P35917 | KHCHKKYL SVQALEAPRLTQNLTDLLVNVSDSLEMRCPVAG  |
| P35917 | LSVQALEAPRLTQNLTDLLVNVSDSLEMRCPVAGAHVPSIV   |
| P35917 | VREEDAGRYLCSVCNAKGCVNSASVAVEGSEDKGSMEIVI    |
| P05690 | NENDRVVQLTVEPMSRQYVNI TMQSPMERIELKNVQVPRV   |
| P02845 | ASFVYSHMKSLSKSRLPFMYNISSACNIALKLLSPKLD SMS  |
| P02845 | EDIQAKLKRI LGIDSMFKVANKTRHPKNRPSKKGNTVLA EF |
| P02845 | QVKQARNKDASSSRSSKSSNSKRSSSKSSNSKRSSSSS      |
| P02845 | SSSRSSKSSNSKRSSSKSSNSKRSSSSSSSSSSSSSRSSS    |
| P02845 | SSSSKSSSHSHSHSHSHGHLNGSSSSSSSRVSHHSHEHH     |
| P02845 | QLVVYADTDSVRPRVQVFVTNLTDSSKWKLCADASVRNAHK   |
| P02845 | LKARCSVSYNKIKTFNEVKFNYSMPANCYHILVQDCSSELK   |

|        |                                             |
|--------|---------------------------------------------|
| P02845 | MHPVNGQVKLLVDGAESPTANISLISAGASLWIHNENQGFA   |
| P55155 | NENDRVVQLTVEPMSRQYVNI TMQSPIERVELKNVQVPRV   |
| Q9N4J2 | NEDRRVVLQLSVEPLSRQYMNMTIQTPEQEVELKNVRI PRV  |
| P18948 | CKDCQQTLEQDKMSSTVLNINI GTSSSFLINSVELRSQHL   |
| P18948 | SRKNMIRATINVEPRQLTVNMTIETPMETTVELERVELPFR   |
| P18947 | NEDRRVVLQLSVEPLSRQYMNMTIQTPEQEVELKNVRI PRV  |
| P38435 | DHADMLKQYATCLSRLLPKYNVTEPQIYFDIIVS INDRFQQ  |
| P38435 | VFIADFPGLHLENFVSEDLGNTSIQLLQGEVTVELVAEQKN   |
| P0C6E3 | KSASSVTLASFANWRESVLPNRTSHDNAQLLTAIVFNRGVI   |
| P0C6E3 | LQVAITMAHEIGHNLGMGHDNNSC TCGGYSCIMLPALSDQP  |
| P0C6E3 | GGYSCIMLPALSDQPSKYFSNCSYIQYRDFIMNQDPQCILN   |
| P30403 | SYETLKAFGKWRESDLIKHVNHSNAQFLMDMKFIKNIIGKA   |
| P30403 | GSSECIMSSHTSDPPSKYFSNCSYQFWKYTENQNPQCILN    |
| P0DM89 | SLNILVALVYLEIWSKEDLINVTSAAKDTLASFGNWRATDL   |
| P0DM89 | NCGTCVMAPTISDQISKLFSNCSKNDYENFLTLYKPKQCILN  |
| P0DM89 | YCYNGKCPIMLNQCISFYGSNATVAPDICFNYNLKGEGNFY   |
| P0DM90 | SLNILVALVYLEIWSKEDLINVTSAAKDTLASFGNWRATDL   |
| P0DM90 | NCGTCVMAPTISDQISKLFSNCSKNDYENFLTLYKPKQCILN  |
| O93523 | GDYPCIMGPTISNEPSKFFSNCSYIQCWDFIMKENPQCILN   |
| Q7LZ61 | FNKIFIELVIIVDHSMAKKCNSTATNTKIYEIVNSANEIFN   |
| Q7LZ61 | PLNIHVTLIGVEFWCDRDLINVTS SADETLNSFGEWRASDL  |
| Q7LZ61 | MAHELSHNLGMYHDGKNCICNDSSCVMSFVLSQPSKLSFN    |
| Q7LZ61 | NDSSCVMSFVLSQPSKLSFNCSIHDIYQRYLTRYKPKCIFN   |
| P0C7B0 | GDYACIMGATISHEPSTFFSNCSYIQCWDFIMDNHEPCEIVN  |
| Q8JIR2 | RDLLKRKSHDNAQLLTAIDFNGTII GLAHVASMCDPKCSTG  |
| Q8JIR2 | VAVIMAHMGHNLGIRHDRENCTCHANS CIMS AVISDQPSK  |
| Q8JIR2 | HANSCIMS AVISDQPSKYFSNCSHVQYWN YINDDEPQCILN |
| Q8JIR2 | YCYNGNCPIMYHQCYALWGANATVAKDSCFEDNQKGN DYGY  |
| P20164 | ALVYLEIWSKQNKITVQSASNVTLDLFGDWRESVLLKQRSH   |
| P20164 | GGFPCIMSPMISDPPSELFSNCSKAYYQTFFLT DHKPQCILN |
| P20164 | YCYNGKCPIMFYQCYFLFGSNATVAEDDCFN NNKKGDKYFY  |
| P20164 | QEDVKCGRLFCDNKYPCHYNYSEDLDFGMVDHGT CADGK    |
| D3TTC2 | VEVGEECDGSPADCQSACCNATTCKLQHEAQCDSEECCEK    |
| P82942 | TVLLPRKRNDNAQLLTGINLNGTAVGIAYPGSLCTQRSVFV   |
| D3TTC1 | GIDFNGNTVGRAYIGSLCKTNE SVAIVQDYNRRI SLVASTI |
| D3TTC1 | PTDSLQRNGHPCQNNQSYCYNGT CPTLTNQCI TLLGPHFTV |
| Q9DGB9 | KKYVKLFLVADYIMYLKGRNLTA VRTRMYDIVNVI TPIYH  |
| Q90282 | GDYACIMRPEISPEPSTFFSNCSYFECWDFIMNHNPECILN   |
| Q58CQ9 | RASSLDTFIAAVYEHAVI LPNATLVVPSFEEALAVMNRNLD  |
| Q58CQ9 | SASKQGAHIIVTPEDGIYGFNFTRESIYPYLEDI PDPQVNW  |
| Q58CQ9 | CLAKDNSIYIVANIGDKKSCNASDPQC PPDGRYQYNTDVVF  |

|        |                                             |
|--------|---------------------------------------------|
| Q58CQ9 | NLFLNEDQFNAPKEPEVVTFNNTFGKFGIFTCFDILFHDP    |
| Q58CQ9 | EEGKLLLAQLDSDPHPTPVVNWTSYASGVEAHSVGNQEFTG   |
| Q58CQ9 | FTGIIFDFEFTFLELKEIGGNYTVCQDLCCHLSYKMSEKR    |
| O95497 | RASCQDTFTAAYVEHAAI LPNATLTPVSREEALALMNRNLD  |
| O95497 | NNRNRFGQTPVQERLSCLAKNNSIYVVANIGDKKPCDTSDF   |
| O95497 | NLFMGENQFNVFKEPEIVTFNNTFGSFGIFTCFDILFHDP    |
| O95497 | LASNIHYPSSKMTGSGIYAPNSSRAFHYDMKTEEGKLLLSQ   |
| O95497 | EEGKLLLSQLDSDPHSHSAVVNWTSYASSIEALSSGNKEFKG  |
| O95497 | FKGTVFDFEFTFVKLTGVAGNYTVCQKDLCCCHLSYKMSNI   |
| O95498 | QVGTQDSFIAAVYEHAVI LPNKTEFPVSQEDALNLMNENID  |
| O95498 | AWAMGMVNLVANTHHVSLNMTGSGIYAPNGPKVYHYDMK     |
| O95498 | IKPPFVQKNTFRGFI SRDGFNFTELFENAGNLTVQKELCC   |
| O95498 | FRGFISRDFNFTELFENAGNLTVQKELCCCHLSYRMLQKE    |
| O95498 | HGRRRREYWQVCTLLKCKTTNLTTCGRPVETASTRFEMFSL   |
| O95498 | EIHLSPGKFEVLKDGRLVKNKGSSGPIITVSLFGRWYTKDS   |
| Q9NFP1 | LSLSAWSDSLAGEVEI INSENASATDII VFPSTLNSAGST  |
| Q9NFP1 | GSTTFVNPEDQINPCLSDPNATYEEFLVTLSCAARNASK     |
| Q9NFP1 | SDPNATYEEFLVTLSCAARNASKYIVINLTKQKCEDIPE     |
| Q9NFP1 | EEFLVTLSCAARNASKYIVINLTKQKCEDIPEDTRPCASN    |
| Q9NFP1 | DRQGVVSRYRKVHLYGEAKNSTFLPELITFETDFGVTFGH    |
| Q9NFP1 | YVENYESELLKLEGTSGAINRTICQGSFCCNFDIAWRSLG    |
| Q9NFP1 | QGSFCCNFDIAWRSLGTATENGSYYSYRLGTYDGRWNNNV    |
| P26332 | WIDAWKAKKALTGAETAEFRNETAGIAGKTGVTKLVVEALL   |
| P26332 | KEEAKKVADETAKDGTNTNTGSSNSFVISKTPWLAVL       |
| P02896 | EDKICSWHKEVKAGEKHCKFNSTKAKEKGVSVTQTQTAGGT   |
| P26334 | NADKKCSYETETDGTCKKCFNATKAEKSGAPVTQAQTVGET   |
| P81824 | IVVGRPCKINVHRSLVLLYNSSSLCSGTLINQEWVLTAA     |
| P85109 | NFDDEQRRSPKEYFFRC SNNFTKWDKDIMLIRLDS PVNNS  |
| P85109 | SNNFTKWDKDIMLIRLDS PVNNSAHIAPLSLSPNPPSVGSV  |
| P85109 | TTSPQEDLSDVPRCANINLNFNTVCRAAYPWL PATSRVLCA  |
| P81176 | PNKDEQTRVPKEKFFCLSSKNYTLWDKDIMLIRLDS PVKNS  |
| P81176 | KNYTLWDKDIMLIRLDS PVKNS THIEPFSLPSPSPSVGSVC |
| Q9PSN3 | SFLCGGTLINQEWVLTAAHCNMSNIYIYLG MHNQSVQFDDE  |
| Q9PSN3 | WVLTAAHCNMSNIYIYLG MHNQSVQFDDEERRYPKEYLFR   |
| Q9PSN3 | QFDDEERRYPKEYLFRCSKNFTKWDKDIMLIRLNKPVNNS    |
| Q9PSN3 | SPPIVGSVCRVMGWTITSPNETLPDVPRCVNINLFNYTVC    |
| Q9PSN3 | ITSPNETLPDVPRCVNINLFNYTVC RGVFPRLPERSRILCA  |
| P09872 | LNKDALRRFPKEYFCLNTRNDTIWDKDIMLIRLNRPVRNS    |
| P09872 | NPPSVGSVCRIMGWTITSPNATLPDVPHCANINILDYAVC    |
| P26324 | GGDECNINEHRFLVAVYEGTNWTFICGGVLHPEWVITAEH    |
| P26324 | SEKFDDEQERYPKKRYFIRC NKTRTSWDEDIMLIRLNKPVN  |

|        |                                               |
|--------|-----------------------------------------------|
| P26324 | NKTRTSWDEDIMLIRLNKPVNNSEHIAPLSLPSNPPIVGSD     |
| P26324 | INRRIDVLSDEPRCANINLHNFTMCHGLFRKMPKKGRVLC      |
| P04971 | ITTS EDTY PDVPHCANINLFNNTVCREAYNGLPAKTL CAGV  |
| Q918X1 | LVIGNECDINEHRFLVAFFNNTGFFCGGTLINPEWVVTAA      |
| P20948 | AGKAACEKTAASIEDVFMKLNFS E PSAVVTTLDGTRVELQN   |
| P20948 | LVAALQARAHELEDAFTIFNESVLETQIAWESSRPPSTDA      |
| P20948 | ESVLETQIAWESSRPPSTANTSQKGPLQRPEKSGESSHLP      |
| P21614 | STSEDCMASELPEHTIKIQNLSKKNKFECCQENTPMNI        |
| P04004 | DVFTMPDEYTVYDDGEEKNATVHEQVGGPSLTS DLQAQS      |
| P04004 | PPAEELCSGKPFDAFTDLKNGSLFAFRGQCYELDEKAVR       |
| P04004 | FKGSQYWRFEDGVLD PDY PRNISDGF DGI PDNVDAALALPA |
| P29788 | DVFTMPEDDYWSYDYVEEPKNNTNTGVQPENTSPPGDLNPR     |
| P29788 | EFPEEELCSGKPFDAFTDLKNGSLFAFRGQCYELDETA VR     |
| P29788 | FKGSQYWRFEDGVLD PGY PRNISEGFSGI PDNVDAAFALPA  |
| P04275 | GKRVLSVYLGEFFDIHLFVNGTVTQGDQRVSM PYASKGLY     |
| P04275 | FVARIDGSGNFQVLLSDRYFNKTCGLCGNFNIFAEDDFMTQ     |
| P04275 | WALSSGEQWCERASPPSSSCNISSGEMQKGLWEQCQLLKST     |
| P04275 | GRCELNC PKGQVYLQCGTFCNLTCSRSLSPDEECNEACLEG    |
| P04275 | APGETVKIGCNTCVCQDRKNCTDHVCDATCSTIGMAHYLT      |
| P04275 | PQSCEERNLRENGYECEWRYN SCAPACQVTCQHPEPLACPV    |
| P04275 | KVTLNPSDPEHCQICHCDVVNLTC EACQEPGGLVVPPTDAP    |
| P04275 | MVLDVAVFVLEGS DKTIGEADFNRSKEFMEEVIQRMDVQDSI   |
| P04275 | EAQSKGDI LQRVREIRYQGGNRTNTGLALRYLSDHSFLVSQ    |
| P04275 | CPPSLVYNHCEHGCPRHCDGNVSSCGDHPSEGCFPPDKVM      |
| P04275 | AWVPDHQPCQICTCLSGRKNCTTQPCPTAKAPT CGLCEVA     |
| P04275 | VPHCERGLQPTLTNPGECRPNFTCACRKECKRVSPSPCPP      |
| P04275 | LP TLRKTQCCDEYECACNCVNSTVSCPLGYLASTATNDCCG    |
| P04275 | NPCLINECVRVKEEVFIQQRNVSCPQLEVPVCP SFGQLSCK    |
| P04275 | CKTSACCPSCRCERMEACMLNGTVIGPGKTV MIDVCTTCRC    |
| P04275 | QCSCCSPTRTEPMQVALHCTNGSVVYHEVLNAMECKCSPRK     |
| Q14508 | LVSGTGA EKTGVCPELQADQNTQECVSDSECADNLKCCSA     |
| P56695 | TAILLFCWFYVYRSEG MKVYNSTLTWQQYGF LCGPRAWKET   |
| P56695 | FLGDWMRCLYGEAYPSCSSGNTSTAEELCR LKQLAKHPCH     |
| P49893 | LLLLCCSGICGAIQWLGLTVNGSRVAWNESEHCRLLDGLVP     |
| P49893 | GICGAIQWLGLTVNGSRVAWNESEHCRLLDGLVPDQSQLCK     |
| P49893 | VNAAKQTKLTCQMTLSDMRWNCSSVENAPSFTPDLSKGTRE     |
| P49893 | PDYCTKNPKLGSYGTQDRLCNKTSVGS DSCNLMCCGRGYNA    |
| Q93097 | GEGAREWIRECQHQFRHHRWNCTTLDRDHTVFGRVMLRSSR     |
| Q93097 | DYLR RRYDGA VQVMATQDGANFTAARQGYRRATR TDLVYFD  |
| P56704 | AEGIKIGIQECQHQFRGRRWNCTTVHDSLAI FGPVLDKATR    |
| P56704 | PNFCEPNPETGSFGTRDRTCNVSSHGIDGCDLLCCGRGHNA     |

|        |                                             |
|--------|---------------------------------------------|
| P28026 | RETSFVHAISSAGVMYTLTRNCMGGDFDNCGDDSRNGRIG    |
| P28026 | SSVAGSELIFLEDSPDYCLKNI SLGLQGTEGRECLQSGKNL  |
| P28026 | KNISLGLQGTEGRECLQSGKNLSQWERRSCKRLCTDCGLRV   |
| P22725 | GEGAKTGIKECQYQFRHRRWNCSTVDNTSVFGRVMQIGSRE   |
| P22725 | GIKECQYQFRHRRWNCSTVDNTSVFGRVMQIGSRETAFTYA   |
| P22725 | NSPTTQDLVYIDPSPDYCVRNESTGSLGTQGRLCNKTSSEGM  |
| P22725 | PDYCVRNESTGSLGTQGRLCNKTSSEGMDCCELMCCGRGYDQ  |
| P09615 | VKGANLAISECQHFRNRWNCSTRNFRSGKNLFGKIVDRG     |
| P09615 | LAISECQHFRNRWNCSTRNFRSGKNLFGKIVDRGCRETS     |
| P09615 | PSFCEKNLRQGI LGTHGRQCNETSLGVDGCGLMCCGRGYRR  |
| P91573 | FKEIVCVKDLQWTSGLVE INNGHTRTLKTECCSYEGMSDAK  |
| P78423 | ATFCHLTVLLAGQHHGVTKCNITCSKMTSKIPVALLIHYQQ   |
| P47989 | ALKIPTSKIYISETSTNTVPNTSPTAASVSADLNGQAVYAA   |
| Q8L5C6 | KGVPSVLSIGGYGTGYSLPSNRSA LDLFDHLWNSYFGGSKP  |
| Q95333 | LICACAWGHPKSLNQREDVRNCSTSPPYLPVTAVNTTAQLT   |
| Q95333 | QREDVRNCSTSPPYLPVTAVNTTAQLTALREQMLTQNL SAY  |
| Q95333 | VTAVNTTAQLTALREQMLTQNL SAYIIPDPTDAHMEYIGEC  |
| Q95333 | YNPFFYSYTLTDSIRL FANKSRFSSETLQYLNSSCNSSM    |
| Q95333 | SSIRL FANKSRFSSETLQYLNSSCNSSMCVQLEDYSQIRDS  |
| Q95333 | LFANKSRFSSETLQYLNSSCNSSMCVQLEDYSQIRDSIQAY   |
| Q6YDN9 | AFYLSSTNNEHDEIDFEFLGNRTGQPVILQTNVFTGGKGNR   |
| Q965Q8 | SRAITPSCAKLQLEACQLKNGTFTINFENQCPNHDSRLI     |
| Q965Q8 | GFLYFGLFEGHECFGNDVSNATAVDDVECRAYKCPGNENS    |
| Q965Q8 | LQVIRDSMKIEKFKDWDYIINFSESDPILPISDFERLITV    |
| Q965Q8 | KIETTDGATFEFLIHRLSHVNL TENEKLV EHG YLLRAVSF |
| Q965Q8 | GTKFEWKEELCREYMGFVTDNDTLHTRLQWHPT EHVKKVGD  |
| Q965Q8 | PYDSVFGGQFDSWNVGKKLSNLTTC SNFFVDIISPSSPDDA  |
| B3A0S5 | CHTLVWHSQLPSWVANGWNNQTLQAVMRDHINAVMGRYRG    |
| Q9BPN8 | DQMPEKWIQELTGAKLTSFINVTS GECIGNVSKPDLFKISR  |
| Q9BPN8 | ELTGAKLTSFINVTS GECIGNVSKPDLFKISR FESIIGADT |
| Q9BPN8 | EVVGGVNAQKWVTCIDGATANDTKVLELVRYAGEETIRPAQ   |
| Q9BPN8 | QSPFSNPLLSIRLAE LPFNSTVALNHVSVELDRYELPVG    |
| Q9BPN8 | YELPVGNEAAVVHGVWCKNRNDTVLVLKPLDEYAAI LNYFD  |
| Q9BPN8 | LVLKPLDEYAAI LNYFDPSTNRSDVVEVLVSKTKKVIHIAG  |
| Q9BPN8 | AGDSFENGVKLFKATPKRYKNGTDYILHDFNYGYEFTMSHG   |
| Q9BPN8 | HGACQSFSPLDSSSEDV LVKNGTDHFIMNM EWLLVDPGLR  |
| Q9BPN8 | SRLNMKTVQLSNCYDEQKFANNTLMVQIKDKTSLDLSQVGL   |
| Q9BPN8 | EMIVRVAEKTEKKPGNVVGYNYTTELTTAEIFKLMNDSMTL   |
| Q9BPN8 | NVVGYNYTELTTAEIFKLMNDSMTLDKMPIEVLKNNGVKE    |
| Q20762 | LTAGQIDLHMYFPFYGGLYNSTLSVNGYIGFATVLDQGP     |
| Q20762 | AADFRQNSRSGRCQALFNGGNHTGLVPVDPTQDFKNTPKVL   |

|        |                                              |
|--------|----------------------------------------------|
| Q20762 | MVRGRYMFVRVDDVVRPAGCSNKTGGTYPMLIYPNIVNMLGE   |
| Q20762 | YDWFKNPLPYTTMPLVWYPRNFTNPEMTQHMDQVRMDDTL     |
| Q20762 | CHDWYDEDEGAQWNFIRDTEETNSSCCPIERQAIADIGRFMPH  |
| Q20762 | RVDFSLGGRYMAQQDLVQPTNATVVTGVVLEATGTDRVHV     |
| O44443 | GCGKGETLFGTSCTPHMCQHNGTIAVGKKEIEICPPPPWDG    |
| Q18594 | VGLPRGCVGTECNFAFSSISNGTHEIEIFGNSVIDKTWLA     |
| Q18594 | DEQTLYCKMAHRVEPIIDRFNVSKVEILMAKGTWMKGGLSY    |
| Q18594 | IILMAKGTWMKGGLSYHGNTNRNTGIIIDLSGESKHKRKN SAV |
| P90850 | LIQPDILEKIHTGRYSWSARNYSAFWGRSLSDGIKYRLGTL    |
| P90850 | SVSTTAISSDRLAIISEGRINSTLSSQQLLSCNQHRQKGE     |
| O16887 | CSIQKCCVNLVLSKLVGKNISAEMYDDIDKYTDYGCIFT      |
| Q18474 | FFAIMVTNPTVVQQVNIQIEVNLQSNPQFVKFVHNI SHLHI   |
| Q18474 | VNQIEVNLQSNPQFVKFVHNI SHLHIKLNTELNETRLPI     |
| Q18474 | FVKFVHNI SHLHIKLNTELNETRLPIVQKFLKELPKAMCN    |
| Q18474 | NETRLPIVQKFLKELPKAMCNVSY SIPALFEGTAVMANTTL   |
| Q18474 | AMCNVSY SIPALFEGTAVMANTTLYGKVNPMSSSVISSVHQ   |
| Q18474 | VNPMSSSVISSVHQKIFSLNNTIIPSVDVHDI FHPRMNIV    |
| Q18474 | RMNIVELDNRKHEDLLQIMSNRTGDFKLN TGDFIKEIVL FN  |
| Q18474 | NRTGDFKLN TGDFIKEIVL FNSTESGSFHEEIGRAVLAPCS  |
| Q18474 | STESGSFHEEIGRAVLAPCSNFTLLRFKKPELISNRVPIFP    |
| Q19040 | FLAEMFVSGVNGDCACYEANNVTGKSAPISNSYMTEDFSPC    |
| Q19040 | ITIKYSQTGSGASMPILNINNGTFVTNVVYGSISTAAGLAP    |
| Q19040 | EGDID SALIGLADLAFTVNKNASTDRNNVQRSVLLTAEW     |
| Q19040 | GDNVASKFTELGLNLLVVGYNLTD AETSQLLRTDRWYNAIN   |
| Q19040 | NLTD AETSQLLRTDRWYNAINSSDKITNVAAFVNPFFYFNN   |
| Q19040 | PPFGITNSVDGTYSWFQEPYNYTGPHGINGVWTD PFDGQTG   |
| Q19077 | VGKNSVVAEEDFDYCATMKNI STKEITYSGRTGATRVFEK    |
| Q21874 | LTSGMTIDL YMFPPYGGLYNYTTISVNGYLG FATVLDQGP   |
| Q21874 | AQDFRGNRSRGR CRAVFNNGNHTGTV EVDPTQPYKNTPKVL  |
| Q21874 | MVRGRYMFVRVDDVVRPAGCSNKTGGTYPIMIYPNIVNMLGD   |
| Q21874 | YEWYKNPMTNYLMPITWYPRNFTNPDILTNGNMMGVRISDD    |
| Q21874 | TLYTYRVGFFKLAPINPDANGTQLLPLGLVSAPISLHWLWT    |
| Q21874 | CHDWYDEDEGALWNFIRDTEETNTSCPIETQALLDLGRFMPH   |
| Q21874 | KVDFGLLGRYISQYELVQPTNATVITGIALEATGTERVIVM    |
| O76565 | LIARDLETGNFPVVSVEFDLNN SAEALEEFPEDA FRDKISS  |
| O76565 | SCVGTDDTLTIQFVILKKTNSALPFAIEDLIDAESIATR      |
| Q9GUC9 | IAKHILMVNPDVVALQEVYANVTRNL TMLGHPWVAVERN H   |
| Q9GUC9 | ILMVNPDVVALQEVYANVTRNL TMLGHPWVAVERNHEY PD   |
| Q9GUC9 | RNHEYPTAILTRHVLIPNTNLSTSGAVGVKIMLRTGFMIH     |
| Q9GUC9 | NVSDPGITWSTVNKNFPEWNYTIPEPQDRIDFLFYKGPVV     |
| Q23307 | ENNEVITVQNAFRIKCLTEDNGSWKTEIIGCVTPDGTEINA    |



|        |                                             |
|--------|---------------------------------------------|
| Q23307 | IPAGETGKIGGFVVKCEQHANGTITMQAANDPKSYDCTAKD   |
| Q23307 | QGKIIGCHAENVGNTIGINQNVTSGDIVYSCTKDGSNYSFK   |
| Q11101 | PVLCQYACSSSELKFGTACSENKTSWKWYDSKLLFCYPYKY   |
| P34434 | APTTPGSEDEDCDWGMQQRIDNCSEPIVHFLSQIERLNLKNM  |
| P90893 | RLTASDGASIQETYPNLQVHNFTQKLDHFDPYNTKTNQKY    |
| P90893 | DPYNTKTNQKYFYNPVFSRNSIIFLMIGGEGPENGKWA      |
| P90893 | TAEGRNSLNNHFNLPFPDANTTKLDINNFFGNI FNTYQGM   |
| P90893 | FGNI FNTYQGMTQYTYDQGSNSTHSDKTVRKMCDIMTNATE  |
| P90893 | GQSNSTHSDKTVRKMCDIMTNATETDVVMRVENLFLWFNQ    |
| P90893 | VVMRVENLFLWFNQMEPASANLTVMPNSYWDVVISQVSGDL   |
| P90893 | SQIMGGNKKSQNYGGADFYNATNVVLPNGSLDPWHALGTY    |
| P90893 | KSQNYGGADFYNATNVVLPNGSLDPWHALGTYGTIKSQSL    |
| P90893 | WHALGTYGTIKSQSLPYLINGTAHCGDMYPSYDGEPGSLI    |
| P34501 | AGRETQTNLGFDCPFPGFRFNYTMVYPMGMLS FGLPPFSAP  |
| P34501 | RQMPGRVSPQGMVVDPWLLDNI TRHIQDGYTGANGFRAEHA  |
| P34501 | QVVLASDEIRTFAI FNYARLNWTS SNEAGGLDGFGGKQAM  |
| P34501 | AGGLDGFGGKQAMAGFNGNGTGWYGLPYSSEGRLWKLY      |
| P34501 | LTPGRWIHRVDEVI IPAGCTNASNGMMTAPPWGP MHGGMA  |
| P34501 | SNGMMTAPPWGP MHGGMAINVS GPCLRPADSVKVN FENWQ |
| P34501 | FYVVNSERAPASVSLKDSVDNKTNRWYEPYAQELALGWQAM   |
| P34501 | KTNRWYEPYAQELALGWQAMNLTWNTGARVDI SLFGY WEDA |
| P34501 | KLMVQVRLEQPDDTLWHAHV NATVITGVAVQENDSSIVQVY  |
| P34501 | DTLWHAHV NATVITGVAVQENDSSIVQVYARKPMRRWRYRT  |
| P34501 | PHWKHQQFKHLDIRNPLQNMNQSEIVIMLKSGVGIRIFEGF   |
| P34501 | IRIFEGFGMLDVMVTLPPSYNTTCRPGESLSSSLNAPRGQR   |
| P34501 | PLLFAESDYRVPYWPQTI DMNASRVFTMEQVVSTCQNNPEC  |
| P34501 | VVFSCKPKYYIHGDI ERVCRNGTWS PGWAWCRDRNLEYAL  |
| Q21268 | GFPFYRNRAEQLAECWKA VPNDTNVLI THTPPLGYLDQFGD |
| P34572 | QKVGLLAKDINDIVASQVDSNSTCTKYGFTRQQKSHDDD     |
| Q23570 | EALPNFEDYMEVVTCIQGKQNISMAAEVCFEGPTKLDRTKM   |
| Q23570 | QENIVAQMAPEMDWAPWILINGTRYKEAEEDLWQFLCDRFI   |
| P34639 | CYSRMIVVQNRDHNHIDMTNSTLLLADEGNTYYIRMHDVK    |
| P52716 | PGLLFKANFKSYSGYVDANANGTWKMHYMLTESRSNPDTDP   |
| P52716 | AAQNYQALTNFFNVAQPKYTNRTFYLSGESYAGIYI PMLTD  |
| P52716 | TLWSAYHGRVSEQNWADIKANCSKGADVDSFDFSQFTTSQN   |
| P52716 | PQAWKQKNTWEDCRMSIYNNYTLKYNTNRFFNNIITNLT     |
| P52716 | QKNTWEDCRMSIYNNYTLKYNTNRFFNNIITNLTTDFRFL    |
| P52716 | YNNYTLKYNTNRFFNNIITNLTTDFRFLIYNGDVDTVCNY    |
| P52716 | AGPSVQMI SNFVWAPKNVVINYTSQDNFNPNIQLSDLVDSG  |
| Q19948 | GSTGCVVTGNVLYANGIRLRNLTSSEQSELATYQTEVEQYK   |
| Q17405 | AFLGHYLTQNYEMMQFKSANESMTTCKNFTRSHKKHQDIV    |

|        |                                             |
|--------|---------------------------------------------|
| Q17405 | KQNYEMMQFKSANESMTTCKNFTRSHKKHQDIVNEEDADEN   |
| Q17405 | NFTRSHKKHQDIVNEEDADENASIKQPTKEELALPKNVQPV   |
| Q17405 | LPKNVQPVWYDVLSLSPKVGNGTMGLAHVKLNIEEPTNKIV   |
| Q17405 | KIQLSKEVTKRAKKSVDSGTNSSEMPEGSGEAMATTATT     |
| Q17405 | TLNKVLDPDFVIGDLVASEVNTSGITIRIWRPEVKHSTE     |
| Q17405 | AKYWFNWEVPLFLKSSGPGVGNVSWLHEAFRLPLNTSDSIYL  |
| Q17405 | KSSGPGVGNVSWLHEAFRLPLNTSDSIYLNNTDSNGVYRVNYE |
| Q17405 | LISDVFALANS GALPFETALNVTSYLPMETATVPWLIATRI  |
| Q17405 | NEKLNELFVEGFLAPCQFSGNFSSDCSEVPGDLREKVCYNG   |
| Q17405 | CSEVPGDLREKVCYNGVEFGNDTVFETVRELAKEEVDGAEK   |
| Q17405 | NSLACFRDPRALRRLILDNLNSTSTVTLRLRKMNSRPVQKE   |
| Q17405 | LRKMNSRPVQKEIATNWIIDNWSTVLKKKFKNDPETLNAIA   |
| Q09288 | VTYRASPGHYRACEHDFFSGNTSAVQADPMDPVEPFIRK     |
| Q09322 | CQKYVEKLAVVQSEMVCATNWSIPPVVCTKCFQNYINFKQ    |
| Q09322 | INFKQFEYETKNLNNVYSLDNRTCSQVIYDNYLLSYSTDIS   |
| Q09322 | EIWEKSRCDSCITIKWNFPQNKSEVSFSERTMQFQNRMYEW   |
| Q09322 | FSERTMQFQNRMYEWRNCVVNYTSGGVLDDNLTNGSKICNL   |
| Q09322 | RMYEWRNCVVNYTSGGVLDDNLTNGSKICNLCKTFDELFG    |
| Q09322 | EWRNCVVNYTSGGVLDDNLTNGSKICNLCKTFDELFGYIW    |
| Q09322 | YWKIYTPDVFVDFVETTMNDTIHLWDDVWKAQDRNR        |
| Q09606 | YAAF LYANPPMKNVMKFNLFNVTNPDEVKYLGAPELIEVG   |
| Q09606 | YGSQ LNYIPEMKTFA YLSGYNNSYDENYWINTGYNDFNKL  |
| Q09606 | AGFRYKNQENVDFYFPDWCDKNTTSLSQCKTANGTFLLP     |
| Q09606 | FPDWCDKNTTSLSQCKTANGTFLLPPIFPLVCYPGHNA      |
| Q09347 | TYQVEKRNDHVLWRSGKCLNSTVNYRIGCKFDDPFETQFK    |
| Q09365 | CITHCADRKS VKAAVRFQFANQSTAVPTYKVRRTFTRYSGM  |
| Q09364 | CITHCADRKS VKAAVRFQFANQSTAVPTYNVRHYTRKSGV   |
| Q19374 | HTPMTKFSPPGFPNADIFFKNETATATRTLKHRFAWALLW    |
| Q19374 | VLSDSQYSLFYDYVIGHKFTNQSGAGIWTTPGIAGIGYGD    |
| Q10011 | EVITIRDKGWL NAYATGIQMNISAAAYQLDGGPQVKIGDCT  |
| Q10011 | FDLAADIVYGKSLCHPINIGNWTALLALNILYSSDASSTPG   |
| Q10011 | FFHTYSTPYFVMSEKEGVMLNMSLAVDLFINPYAKTKQNIL   |
| Q10011 | KQNILARLVVDTFSTVEPFLNHTRIHGRLQNSTITARVDFS   |
| Q10011 | DTFSTVEPFLNHTRIHGRLQNSTITARVDFS NIGDIPKAF   |
| Q10011 | TAREAVRSVLGVGIPIPSYDNVTLADSSSTIEVFDQFLRANI  |
| Q10019 | SPSSSVYNASTLILPSKTKNRSSNSSIDSGIRDEQLTPSP    |
| Q10022 | VTKHVGRRLRPHFLDVCKLANDTCVTGDSHRYITDYTCTGP   |
| P54002 | IHNHYGSHVEIYRSLNAELTNRTNFKNFHDPIRVCVGREWH   |
| P52717 | ASVVYIESFAGVGYSYATDGNITTDNDLTSLENYEAVKQFF   |
| P52717 | MKHMRLRGVAPAMAHFDEL LKNQTKTSLYQLKNKSQSQKPL  |
| P52717 | AHFDEL LKNQTKTSLYQLKNKSQSQKPLKADVPC LNDTEM  |

|        |                                            |
|--------|--------------------------------------------|
| P52717 | QFLKNKSQSQKPLKADVPCLNDEMLSYMNNPKVRKATHIP   |
| O17861 | KCGFASFCDKHRAATHNQKINITVLIIEALCPDCQNFLTKQL |
| Q10904 | MIYFPSVFKKLGVVTDALTNKTIYTIVRNEDVEALQVFKF   |
| P52714 | DYYDFMQFMKTTNKM DYLDADNSTECGRLEPLLGQFSETFD |
| P25311 | LQKAREDFMETLKDIVEYYNDSNGSHVLQGRFGCEIENNR   |
| P25311 | AREDFMETLKDIVEYYNDSNGSHVLQGRFGCEIENNRSSG   |
| P25311 | YNDNNGSHVLQGRFGCEIENNRSSGAFWKYYYDGDYIEFN   |
| P25311 | WTRAGEVQEPQLRGDVLHNGNGTYQSWVVAVPPQDTAPYS   |
| Q64726 | YKDTTGSHTFQGMFGCEITNNRSSGAVWRYAYDGEDFIEFN  |
| Q64726 | VQRAKAYLEEECEPEMLKRYLNYSRSHLDRIDPPTVTITSRV |
| Q64726 | WNKANKLAFEPERGVFPNGNGTYLSWAEVEVSPQDIDFFF   |
| Q62005 | FEYSYDCGVRGMQLLVFPRPNQTVQFKVLDEFGNRFVNNC   |
| Q62005 | PNQTVQFKVLDEFGNRFVNNCSICYHWVTSEAQEHTVFSA   |
| Q62005 | GTHLPQERCQVAGSHIPCMVNGSSKETCQQAGCCYDSTKEE  |
| Q62005 | GPQGSITRDSAFRLHVRCIFNASDFLPIQASIFSPQPPAPV  |
| Q62005 | TCSTTCDSGIARRRRSSGHHNITLRALDIVSSPGAVGFEDA  |
| Q62005 | SPGAVGFEDAAKLEPSGSSRNSSSRMLLLLLAITLALAAGI  |
| O54766 | FQYSYDCGVQGMQLLVFPRPNQTIQFKVLDEFGNRFVNNC   |
| O54766 | PNQTIQFKVLDEFGNRFVNNCSICYHWVISEAQKPAVFSA   |
| O54766 | GPQGSITRDGVFRLHVRCIFNASDFLPIRASIFSPQPPAPV  |
| Q9BH10 | TLGNKIQHASVVDSLGLKMLNCTYVLDPEKLTLPKAPYESCT |
| Q9BH10 | AGPKPQMGWTVTVGDGERAQNLTQEQALTYQYNLLIENQKM  |
| Q9BH10 | PGQTIILSSRLICASDPVTCNATHMTLTIPFPGLKKSVSF   |
| Q9BH10 | KDYPVVRYLRQPIYLEVRVLNRTDPNIKLVLDLDCWATSTMD |
| P20239 | RFDMEKWNPSVVDTLGSEILNCTYALDLERFVLFKFPYETCT |
| P20239 | RDLISFSFPQLFSRLADENQNVSEMGWIVKIGNGTRAHILP  |
| P20239 | SRLADENQNVSEMGWIVKIGNGTRAHILPLKDAIVQGFNLL  |
| P20239 | IVQGFNLLIDSQKVTLHVPANATGIVHYVQESSYLYTVQLE  |
| P20239 | GQKIVFSSHAICAPDLSVACNATHMTLTIPFPGLKLESVDF  |
| P20239 | FEVYSHQTKPALNLDLTLVGNSSCQPIFKVQSVGLARFHIP  |
| O54767 | RFDMEKWNPSLVDTFGNEISNCTYALDLEKFIKFPYETCT   |
| O54767 | EDLISFSFPQLFSRLADENQNVSEMGWIKIGNGTRVHTLP   |
| O54767 | SRLADENQNVSEMGWIKIGNGTRVHTLPLKDAIVQGFNLL   |
| O54767 | IVQGFNLLIDSQKITLHVPANATGVAHYVQESSYLYTVQLK  |
| O54767 | GQKITFSSQAICAPDLSVACNVTHMSLTIPFPGLKKSVMGF  |
| O54767 | FEVYSHQTKPALNLESLLVGNSSCQPIFKVQSLGLARFHIP  |
| O54767 | IIMDGCEYELDNYRTTFHAANSAAHSGHYQRFVKTFAFV    |
| P79762 | VIIRTNPAVPIECHYPRENVSSNAIRPTWSPFNALSAAE    |
| P21754 | VTDDALVYSTFLLHDPVGNLSIVRTNRABIEICRYPRQ     |
| P21754 | SIVRTNRABIEICRYPRQGNVSSQAILPTWLPFRTTVFSE   |
| P21754 | SHVPLRLFVDHCVATPTPDQNASPYHTIVDFHGCLVDGLTD  |

|        |                                             |
|--------|---------------------------------------------|
| P21754 | KVPRPGPDTLQFTVDVVFHFANDSRNMIYITCHLKVTLAEQD  |
| Q07287 | TATPPALVVWDRRRLHKLQNDSCGCTVWHKGGSSMGVEA     |
| Q07287 | GNTVTSRCTQDGHFSIAVSRNVTS PPLLWDSVHLAFRNDSE  |
| Q07287 | VSRNVTS PPLLWDSVHLAFRNDSECKPVMETHTFVLFRRFPF |
| Q07287 | PGPLTLELQIAKDERYGSYYNADYPVVKLLREPIYVEVSI    |
| Q07287 | ICVTTCPAARRRRSSDIHFQNGTASISSKGPMLLQATRDS    |
| P97708 | SILRTNRVEVPIECRYPRQGNVSSHPIQPTWVPFSATVSSE   |
| P97708 | QVPRPRPETLQFTVDVVFHFANSRNTVYITCHLKVAPANQI   |
| P97708 | HLKVAPANQIPDKLNKACSFNKTSQSWLPVEGDADICDCCS   |
| P97708 | SQSWLPVEGDADICDCCSNGNCSNSSSEFETHEPAQWSTL    |
| P97708 | WLPVEGDADICDCCSNGNCSNSSSEFETHEPAQWSTLVSR    |
| P10761 | SILRTNRVEVPIECRYPRQGNVSSHPIQPTWVPFRATVSSE   |
| P10761 | QVPRPRPETLQFTVDVVFHFANSRNTLYITCHLKVAPANQI   |
| P10761 | HLKVAPANQIPDKLNKACSFNKTSQSWLPVEGDADICDCCS   |
| P10761 | SQSWLPVEGDADICDCCSHGNCNSSSSQFQIHGPRQWSKL    |
| P10761 | WLPVEGDADICDCCSHGNCNSSSSQFQIHGPRQWSKLVSR    |
| Q8R121 | EEKEEGKDEEYWLRSQQLSNETS SFGFNLLRKI SMRHDGN  |
| Q8R121 | LSQGSFAFIHKDFDIKETYFNLSKKYFDIEYVSINFQNSSQ   |
| Q8R121 | DTFHLDKYRAIKVPMYREGNFTSTFDKKFRCHILKLPYQG    |
| Q8R121 | FTSTFDKKFRCHILKLPYQGNATMLVVLMEKTGDYLALEDY   |
| P42098 | VTDDALVYSTFLRHDRPAGNLSI LRTNRAEVPIECHYPRQ   |
| P42098 | SILRTNRAEVPIECHYPRQGNVSSWAILPTWVPFRRTTVFSE  |
| P42098 | FRTTVFSEEKLVFSLRLMEENWSAEKMTPTFQLGDRAHLQA   |
| P42098 | KAPRPGPETLQFTVDVVFHFANDSRNTIYITCHLKVTPADRV  |
| Q9UK55 | VWLVPLGAPSPQSPETPAPQNQTSRVVQAPKEEEEDEQEAS   |
| Q9UK55 | LTQGSFAFIHKDFDVKETFNLSKRYFDTECVPMNFRNASQ    |
| Q9UK55 | TFFNLSKRYFDTECVPMNFRNASQAKRLMNHYINKETRGI    |
| Q9UK55 | FASTFDKNFRCHVCLKLPYQGNATMLVVLMEKMGDHLALEDY  |
| P05532 | ARVDDSGVFCYANNTFGSANVTTLKVVEKGFINISPVKN     |
| P05532 | NVTTLKVVEKGFINISPVKNITVFTDGENVDLVVEYBAY     |
| P05532 | DLVVEYEAYPKPEHQQWIYMNRTSANKGKDYVKS DNKSNIR  |
| P05532 | QWIYMNRTSANKGKDYVKS DNKSNIRYVNQLRLRLKGTGEG  |
| P05532 | CTGAEQRCTTPVSPVDVQVQNVSVSPFGKLVVQSSIDSSVF   |
| P05532 | VSPFGKLVVQSSIDSSVFRHNGTVECKASNDVGKSSAFFNF   |
| Q9UKR0 | SIFLLLCVLGLSQAATPKIFNGTECGRNSQPWQGLFEGTS    |
| Q9UKR0 | SGWGITNHPRNFPDQLLQCLNLSIVSHATCHGVYGRITSN    |
| P06870 | DDENTAQFVHVSESFPHPGFNMSLLENHTRQADEDYSHDLM   |
| P06870 | QFVHVSESFPHPGFNMSLLENHTRQADEDYSHDLMMLRLTE   |
| P06870 | EEPEVGSTCLASGWSIEFENFSFPDDLQCVDLKILPNDEC    |
| P12323 | EDEDTAQHFLVSQSVPHPDFNMSLLEPHNLPNEDYSHDLM    |
| P12323 | LQCVGLEI LPSKNCDDAHIANVTGTMLCAGDLAGGKDTCVG  |

|        |                                            |
|--------|--------------------------------------------|
| P00759 | QRRLVRQSFRRHPDYIPLIVTNDTEQPVHDHSNDLMLLHLS  |
| P00759 | LQCVNIHLLSNEKCIETYKDNVTDVMLCAGEMEGKDTACAG  |
| P07288 | VCGGVLVHPQWVLTAAHCIRNKSIVILLGRHSLFHPEDTGQV |
| 075882 | PEVVATSGYALLHFFSDAAYNLTFGNITYSFDMPNNCSGR   |
| 075882 | TSGYALLHFFSDAAYNLTFGNITYSFDMPNNCSGRGECKI   |
| 075882 | DAAYNLTFGNITYSFDMPNNCSGRGECKISNSSDTVECEC   |
| 075882 | TYSFDMPNNCSGRGECKISNSSDTVECECSENWKGEACDI   |
| 075882 | EACDIPHCTDNCGFPHRGICNSSDVRGCSCFSDWQPGCSV   |
| 075882 | RGCSCFSDWQPGCSVPVPANQSFWTREESNLKLPRAHSHK   |
| 075882 | ASHKAVVNGNIMWVVGGMFNHSDYNMVLAYDLASREWLP    |
| 075882 | HSDYNMVLAYDLASREWLPNRSVNNVVRYGHSALYKDK     |
| 075882 | SLALYKDKIYMYGGKIDSTGNVTNELRVFHIHNESWVLLTP  |
| 075882 | GGKIDSTGNVTNELRVFHIHNESWVLLTPKAKEQYAVVGHS  |
| 075882 | YLHTAVIVSGTMLVFGGNTHTDTSMSHGAKCFSSDFMAYDI  |
| 075882 | LPRPDLHHDVNRFGHSAVLHNSMVFVGGFNSLLSIDI LVF  |
| 075882 | YSCTANTNDCHWCNDHCVPRNHSCSEGQISIFRYENCPKDN  |
| 075882 | QSSQSMSKLTLPWVGLRKINVSYWCWEDMSPFTNSLLQWM   |
| 075882 | GILSEPSTRGLKAATCINPLNGSVCERPANHSKQCRTPCA   |
| 075882 | GLKAATCINPLNGSVCERPANHSKQCRTPCALRTACGDCT   |
| 075882 | ASFPFGQCMWYTMSTCPENCNCGYCTCSHCLEQPGCGWCT   |
| 075882 | GPVKMPSQAPTGNFYQPPLLNSMCLEDSRYNWSFIHCPAC   |
| 075882 | GNFYQPPLLNSMCLEDSRYNWSFIHCPACQCNHSGKINQ    |
| 075882 | YNWSFIHCPACQCNHSGKINQSI CEKCNLTGKHCETCI    |
| 075882 | ACQCNGHSGKINQSI CEKCNLTGKHCETCISGFYGDPTN   |
| 075882 | TAINFVATPDEQNRDLDMFINASKNFNLNITWAASFAGTQ   |
| 075882 | PDEQNRDLDMFINASKNFNLNITWAASFAGTQAGEEMPVV   |
| 075882 | NIKEYKDSFSNEKFDFRNHPNITFFVYVSNFTWPIKIQIAF  |
| 075882 | SNEKFDFRNHPNITFFVYVSNFTWPIKIQIAFSQHSNFMDL  |
| Q76LX8 | AQFRVHLVKMVLTEPEGAPNITANLTSSLLSVCWSQTIN    |
| Q8IUA7 | LKGRTIMGWPDEKSMDELNLNYSIDAVRVI FTDTFSYHLKF |
| Q8IUA7 | EKGFVAFQAAINAAIEIATNHSVMEQLMSVTGVHMKILPF   |
| Q8IUA7 | FLHSLRRQNIAIEVDAGFTRNGTDDPSYNGAIVSGDEKDH   |
| 094911 | LGRVDTFNESRFSVYTPVTNTTQIMNKVASTPFLAGKEV    |
| 094911 | DLYLFSCISFSSFTYYASVNVTRERKRMKALMTMMGLRDS   |
| 094911 | HDSFEQAPPEFQGKEAIRIRNVTKYKGPDKIEALKDLVF    |
| 094911 | PTKGSVTIYNNKLESEMADLENLSKLTGVCPQSNVQDFLTV  |
| 094911 | FIQSVEHQNIAIEVDAGFTRNGTDDPSYNGAITVCCNEKNY  |
| 095342 | VFIDYDVELQELQIPGKACVNNTIVWTNSSLNQNMNGTRC   |
| 095342 | ELQELQIPGKACVNNTIVWTNSSLNQNMNGTRCGLLNIES   |
| 095342 | IPGKACVNNTIVWTNSSLNQNMNGTRCGLLNIESEMIKFA   |
| 095342 | KACVNNTIVWTNSSLNQNMNGTRCGLLNIESEMIKFASY    |

|        |                                            |
|--------|--------------------------------------------|
| Q09427 | IDYWLAkWTDsALVLSpAARNCSLSQECdLDQsVYAMVFTL  |
| Q09429 | IDYWLAkWTDsALVLSpAARNCSLSQECALDQsVYAMVFTV  |
| Q9UNQ0 | YGFTALQHNEFLGQNFcPGLNATGNnPCNYATCTGEEYLK   |
| U6A629 | LPLLASyASAVTIsvAKSGGNVTTGLQYgAMEEEInHCgEG  |
| U6A629 | TYPsNLDAsAVGGSTLSLQNLsNPLSSALPTsvRITGKGT   |
| U6A629 | ANDWVQHEFTLTpKKKAsSSNNTFVLTfDASKASGGSLDFN  |
| U6A629 | LRFPgGNnLEGQTIEGRWkWNETIGPLTQRpGRATTWGYEE  |
| U6A629 | AKYGHpKpWtIRyVEVGNEDnSSGLSSyKsYRFQAFYDAI   |
| U6A629 | KSTsWHVYnNHMTnTLpATsNDTFGpPLLChRCETAKTNSH  |
| U6A629 | LChRCETAKTNSHIFKAaVYNStADVPVSLTFEGVGRGTTA  |
| Q8NK89 | ISPLTAGGIADAsAQDTFCANTtCLITIIYDQSGNGNHLTQ  |
| Q8NK89 | NAETsSDTDGAGHMEAIYLGnStTWGyGAGDGPWIMVDMEN  |
| U6BLZ9 | KRGSDGATTDIAPRHAGGVANATHQDTFCAGTTCLITIIYD  |
| U6BLZ9 | PNKWAIrGgNAAsGpLStFYngSRPNARGYNpMSKEGAILL  |
| U6BLZ9 | GSSISLRATTLcCTTRYVAHngStVNTQVvSSSSsAALKQq  |
| P42254 | LLSLVQNAHGISLkVSTQGGnSSpILyGFMfEDInHSGDg   |
| P42254 | STQGGnSSpILyGFMfEDInHSGDGGIYGQMLQNPGLQGT   |
| P42254 | GDGGIYGQMLQNPGLQGTAPnLTAWAAVGDATIAIDGDSPL  |
| P42254 | HSSFWIKGDYSGDITVRLVGNyTGTEYgSTTIThTStADNF  |
| P42254 | GNYTGTEYgSTTIThTStADnFTQAsVKFPtTKAPDGNVLY  |
| P42254 | LRFPgGNnLEGNSAENRWkWNETIGDLCDRpGREGTWTYYN  |
| P42254 | GDTStTYGAwRAANGQEEpWnLTMVEIGNEDMLGGGCEsYA  |
| P42254 | YHDYStPDGLVGQFNyFDnLNRsvPYFIgEYSrWEIDWPNM  |
| P42254 | FERNsDVVKMAAYAPLLQLINStQWTPDLIGYtQSPGDIFL  |
| P13689 | lMGSSSLKYPGQPQEIpfFQNTfSIPVNDPhQVWNSDEHE   |
| P11140 | VMIYDCTsAVAEATYWEIWDNGTIInPKsALVLSAESSsMG  |
| P11140 | GGTLTVQtNEyLMRQGWRTGNNTSPFVtSISGyDLcMQAQ   |
| P38433 | PVGNLRfKkPKPKQpWRIPLNATTpPNSCIQsEDTYFGDFY  |
| P38433 | EPRDVALARAVILYNAMKCGNMSLInPDYDRILDCfQRADA  |
| P38433 | VlHGyEInFIgEPLNQRfNYtDEERElsNRfMRYWANFA    |
| P38433 | DGSfTQDvWPKYNSVsMEYMNMTVESSySPMKRIHGpRRK   |
| Q9BYF1 | NHEAEDLFYQSSLASWNYNTNIteENVQNMnNAGDKWSAFL  |
| Q9BYF1 | SAFLKEQStLAQMYPLQEIQNLtVKLQLQALQqNGSSVLSE  |
| Q9BYF1 | YPLQEIQNLtVKLQLQALQqNGSSVLSEdKSKRLNtILNTM  |
| Q9BYF1 | WDAQRIfKEAEKFFVsVGLPNMTQGFwENSMLTDpGNVQKA  |
| Q9BYF1 | AATPKHLKsIGLLSPDFQEDNETEInFLlKQALtIVGTLpF  |
| Q9BYF1 | QEALCQAkHEGpLHKCDISnStEAGQKLFNMLRLGKSEPW   |
| Q9BYF1 | VRVANLkPRIsfNFFVtAPKNVSDIIPrTEVEKAIrMSRSR  |
| P07140 | QERYEYfPFGfSGEEIwNPNTNVSEdCLYInVWAPAKARLRH |
| P07140 | EHPNGKQADTDHLIHNGNPQNTnGLPIliWiYGGGfMTGS   |
| P07140 | HMTSEKAVEIGKALINDCNcNASMLKtNPAHVMSCMRSVDA  |

|        |                                             |
|--------|---------------------------------------------|
| P07140 | GEWMGVLHGDEIEYFFGQPLNNSLQYRPVERELGKRMLSAV   |
| P21836 | RRRATLLARLVGCPGAGGNDTELIACLRTRPAQDLVDHE     |
| P21836 | VVKDEGSYFLVYGVPGFSKDNEISRAQFLAGVRIQVFPQA    |
| P21836 | GVPHGYEIEFIFGLPLDPSLNYTTEERIFAQRLMKYWTNFA   |
| P04058 | PVGNMRFRRPEPKKPWSGVWNASTYPNNCQQYVDEQFPGFS   |
| P04058 | GDHNVICPLMHFVNKYTKFGNGTYLYFFNHRASNLVWPEWM   |
| P04058 | GVIHGYEIEFVFGPLPVKELNYTAEELSRIMHYWATFA      |
| P04058 | HQRLRVQMCVFNQFLPKLLNATACDGELESSSGTSSSKGII   |
| P12821 | LLLLLPPQPALALDPGLQPGNFSADEAGAQLFAQSYNSSAE   |
| P12821 | LQPGNFSADEAGAQLFAQSYNSSAEQVLFQSVAAASWAHDTN  |
| P12821 | NSSAEQVLFQSVAAASWAHDTNITAENARRQEEAALLSQEFA  |
| P12821 | QEFAEAWGQKAKELYEPIWQNFDPQLRRIIGAVRTLGSAN    |
| P12821 | TLGSANLPLAKRQQYNALLSNMSRIYSTAKVCLPNKTATCW   |
| P12821 | YNALLSNMSRIYSTAKVCLPNKTATCWSLDPDLTNI LASSR  |
| P12821 | VFFPDKPNLDVTSTMLQQGNATHMFRVAEEFFTSLELSPM    |
| Q5RDA4 | SLGWLKSNCRHERDAGVCTNETRSTHTLDLSRELSEALGQ    |
| Q5RDA4 | HTVILTANLEAQALWKEPGSNVMSVDAECVPMVRDLLRYF    |
| Q5RDA4 | LVEKIRFPMMLEPELFEQFNLSLYWSHEALFQKKTQALE     |
| Q5RDA4 | LQALEFHTVFPQLLARYKGLNLTEDTYKPRIYTSPTWSAFV   |
| Q5RDA4 | VADVDFEGWKAAPSAALDTNSKSTSSFPAGHFNGFRT       |
| A7E3W2 | CENMWDLTDA SVVCRALGFQNA TEALGGAAPGPGYGPIMLD |
| A7E3W2 | SLGWMSNCRHDKDASVICTNETRGVYTLDLSEGELPAALEQ   |
| A7E3W2 | LVGQVRFPMPMPQDLFSLQFNLSLYWSHEALFQKKTQALE    |
| A7E3W2 | LQALEFHTVFPFELLAQYWGLNLTEGTYQPRLYTSPTWSQSV  |
| Q99538 | YDDIAYSEDNPTPGIVINRPNGTDVYQGVPKDYTGEDVTPQ   |
| Q99538 | DHGSTGILVFPNEDLHVKDLNETIHYMYKHKMYRKMVFYIE   |
| Q99538 | VEDLTKETLHKQYHLVKSHTNTSHVMQYGNKTI STMKVMQF  |
| Q99538 | HKQYHLVKSHTNTSHVMQYGNKTI STMKVMQFQGMKRKASS  |
| Q9BXB1 | LTAVPEGLSAFTQALDISMNNITQLPEDAFKNFPFLEELQL   |
| Q9BXB1 | LQALTLALNKISSIPDFAFTNLSSLVVLHLHNNKIRSLSQH   |
| Q9BXB1 | LRTIHLYDNPLSFVGNFAFHNLSLHSLVIRGASMVQQFPN    |
| Q9BXB1 | NLSLHSLVIRGASMVQQFPNLGTVHLESILTGTGKISSI     |
| Q9BXB1 | EDNSLQDHSAQEKGTAANVTSTLENEEHSQIIHCTPS       |
| O75473 | DGRMLLRVDCSDLGLSELPSNLSVFTSYLDLSMNNISQLLP   |
| O75473 | LSELPSNLSVFTSYLDLSMNNISQLLPNPLPSLRFLEELRL   |
| O75473 | LQAMTLALNKIHHIPDYAFGNLSSLVVLHLHNNRIHSLGKK   |
| O75473 | CAFGVCENAYKISNQWNGDNSMDDLHKKDAGMFAQQDER     |
| O75473 | LFTNCILNCPVAFLSFSSLINLTFISPEVIKIFILVVVPLP   |
| P38571 | TLHSEGGGKLTAVDPETNMNVSEIISYWGFPSEEYLVETE    |
| P38571 | LVETEDGYILCLNRIPHGRKNHSDKGPVVFVFLQHGLLADS   |
| P38571 | VVFLQHGLLADSSNVVTNLANS SLGFILADAGFDVWVGNSR  |

|        |                                           |
|--------|-------------------------------------------|
| P38571 | AFSYDEMAKYDLPASINFILNKTGQEQVYYVGHSGGTTIGF |
| P38571 | LKELCGNLCFLLCGFNERNLNMSRVDVYTHSPAGTSVQNM  |
